# Supplementary material for: Utility of the trnH–psbA Intergenic Spacer Region and Its Combinations as Plant DNA Barcodes: A Meta-Analysis
Source: PubMed Central journal article supplement (PMC3498263; doi:10.1371/journal.pone.0048833), 2012-11-14
Supplement: pone.0048833.s001.pdf [file pone.0048833.s001.pdf]

**Table S1.** List of sequences containing *rps19*.

| <b>Taxonomy group</b> | <b>Family</b>   | <b>Genus</b>      | <b>Species</b>                | <b>GenBank accesstion no.</b> |
|-----------------------|-----------------|-------------------|-------------------------------|-------------------------------|
| Eudicotyledons        | Asteraceae      | <i>Achillea</i>   | <i>Achillea millefolium</i>   | FJ395492                      |
| Eudicotyledons        | Asteraceae      | <i>Eupatorium</i> | <i>Eupatorium perfoliatum</i> | GU014469                      |
| Eudicotyledons        | Melastomataceae | <i>Melastoma</i>  | <i>Melastoma candidum</i>     | JF708230                      |
| Eudicotyledons        | Acanthaceae     | <i>Ruellia</i>    | <i>Ruellia elegans</i>        | GU003917                      |
| Eudicotyledons        | Lamiaceae       | <i>Glechoma</i>   | <i>Glechoma hederacea</i>     | FJ395524                      |
| Eudicotyledons        | Lamiaceae       | <i>Mentha</i>     | <i>Mentha spicata</i>         | EU585744                      |
| Eudicotyledons        | Rosaceae        | <i>Potentilla</i> | <i>Potentilla reptans</i>     | FJ395525                      |
| Eudicotyledons        | Asteraceae      | <i>Senecio</i>    | <i>Senecio vulgaris</i>       | FJ395482                      |
| Eudicotyledons        | Fagaceae        | <i>Quercus</i>    | <i>Quercus phillyraeoides</i> | AB650376                      |
| Eudicotyledons        | Fagaceae        | <i>Quercus</i>    | <i>Quercus phillyraeoides</i> | AB650377                      |
| Eudicotyledons        | Fagaceae        | <i>Quercus</i>    | <i>Quercus phillyraeoides</i> | AB650378                      |
| Eudicotyledons        | Fagaceae        | <i>Quercus</i>    | <i>Quercus phillyraeoides</i> | AB650379                      |
| Eudicotyledons        | Fagaceae        | <i>Quercus</i>    | <i>Quercus phillyraeoides</i> | AB650380                      |
| Eudicotyledons        | Fagaceae        | <i>Quercus</i>    | <i>Quercus phillyraeoides</i> | AB650381                      |
| Eudicotyledons        | Fagaceae        | <i>Quercus</i>    | <i>Quercus phillyraeoides</i> | AB650382                      |
| Eudicotyledons        | Fagaceae        | <i>Quercus</i>    | <i>Quercus phillyraeoides</i> | AB650383                      |
| Eudicotyledons        | Fagaceae        | <i>Quercus</i>    | <i>Quercus phillyraeoides</i> | AB650384                      |
| Eudicotyledons        | Fagaceae        | <i>Quercus</i>    | <i>Quercus phillyraeoides</i> | AB650385                      |
| Eudicotyledons        | Fagaceae        | <i>Quercus</i>    | <i>Quercus phillyraeoides</i> | AB650386                      |
| Eudicotyledons        | Fagaceae        | <i>Quercus</i>    | <i>Quercus phillyraeoides</i> | AB650387                      |
| Eudicotyledons        | Fagaceae        | <i>Quercus</i>    | <i>Quercus phillyraeoides</i> | AB650388                      |
| Eudicotyledons        | Fagaceae        | <i>Quercus</i>    | <i>Quercus phillyraeoides</i> | AB650389                      |
| Eudicotyledons        | Fagaceae        | <i>Quercus</i>    | <i>Quercus phillyraeoides</i> | AB650390                      |
| Eudicotyledons        | Fagaceae        | <i>Quercus</i>    | <i>Quercus phillyraeoides</i> | AB650391                      |
| Eudicotyledons        | Fagaceae        | <i>Quercus</i>    | <i>Quercus phillyraeoides</i> | AB650392                      |
| Eudicotyledons        | Fagaceae        | <i>Quercus</i>    | <i>Quercus phillyraeoides</i> | AB650393                      |
| Eudicotyledons        | Fagaceae        | <i>Quercus</i>    | <i>Quercus phillyraeoides</i> | AB650394                      |
| Eudicotyledons        | Fagaceae        | <i>Quercus</i>    | <i>Quercus phillyraeoides</i> | AB650395                      |
| Eudicotyledons        | Fagaceae        | <i>Quercus</i>    | <i>Quercus phillyraeoides</i> | AB650396                      |
| Eudicotyledons        | Fagaceae        | <i>Quercus</i>    | <i>Quercus phillyraeoides</i> | AB650397                      |
| Eudicotyledons        | Fagaceae        | <i>Quercus</i>    | <i>Quercus phillyraeoides</i> | AB650398                      |
| Eudicotyledons        | Fagaceae        | <i>Quercus</i>    | <i>Quercus phillyraeoides</i> | AB650399                      |
| Eudicotyledons        | Fagaceae        | <i>Quercus</i>    | <i>Quercus phillyraeoides</i> | AB650400                      |
| Eudicotyledons        | Fagaceae        | <i>Quercus</i>    | <i>Quercus phillyraeoides</i> | AB650401                      |
| Eudicotyledons        | Fagaceae        | <i>Quercus</i>    | <i>Quercus phillyraeoides</i> | AB650402                      |
| Eudicotyledons        | Fagaceae        | <i>Quercus</i>    | <i>Quercus phillyraeoides</i> | AB650403                      |
| Eudicotyledons        | Fagaceae        | <i>Quercus</i>    | <i>Quercus phillyraeoides</i> | AB650404                      |
| Eudicotyledons        | Fagaceae        | <i>Quercus</i>    | <i>Quercus phillyraeoides</i> | AB650405                      |
| Eudicotyledons        | Fagaceae        | <i>Quercus</i>    | <i>Quercus phillyraeoides</i> | AB650406                      |
| Eudicotyledons        | Fagaceae        | <i>Quercus</i>    | <i>Quercus phillyraeoides</i> | AB650407                      |
| Eudicotyledons        | Fagaceae        | <i>Quercus</i>    | <i>Quercus phillyraeoides</i> | AB650408                      |
| Eudicotyledons        | Fagaceae        | <i>Quercus</i>    | <i>Quercus phillyraeoides</i> | AB650409                      |
| Eudicotyledons        | Fagaceae        | <i>Quercus</i>    | <i>Quercus phillyraeoides</i> | AB650410                      |
| Eudicotyledons        | Fagaceae        | <i>Quercus</i>    | <i>Quercus phillyraeoides</i> | AB650411                      |
| Eudicotyledons        | Fagaceae        | <i>Quercus</i>    | <i>Quercus phillyraeoides</i> | AB650412                      |
| Eudicotyledons        | Fagaceae        | <i>Quercus</i>    | <i>Quercus phillyraeoides</i> | AB650413                      |
| Eudicotyledons        | Fagaceae        | <i>Quercus</i>    | <i>Quercus phillyraeoides</i> | AB650414                      |
| Eudicotyledons        | Fagaceae        | <i>Quercus</i>    | <i>Quercus phillyraeoides</i> | AB650415                      |
| Eudicotyledons        | Fagaceae        | <i>Quercus</i>    | <i>Quercus phillyraeoides</i> | AB650416                      |
| Eudicotyledons        | Fagaceae        | <i>Quercus</i>    | <i>Quercus phillyraeoides</i> | AB650417                      |
| Eudicotyledons        | Fagaceae        | <i>Quercus</i>    | <i>Quercus phillyraeoides</i> | AB650418                      |

|                |               |                    |                               |          |
|----------------|---------------|--------------------|-------------------------------|----------|
| Eudicotyledons | Fagaceae      | <i>Quercus</i>     | <i>Quercus phillyraeoides</i> | AB650419 |
| Eudicotyledons | Fagaceae      | <i>Quercus</i>     | <i>Quercus phillyraeoides</i> | AB650420 |
| Eudicotyledons | Fagaceae      | <i>Quercus</i>     | <i>Quercus phillyraeoides</i> | AB650421 |
| Eudicotyledons | Fagaceae      | <i>Quercus</i>     | <i>Quercus phillyraeoides</i> | AB650422 |
| Eudicotyledons | Fagaceae      | <i>Quercus</i>     | <i>Quercus phillyraeoides</i> | AB650423 |
| Eudicotyledons | Fagaceae      | <i>Quercus</i>     | <i>Quercus phillyraeoides</i> | AB650424 |
| Eudicotyledons | Fagaceae      | <i>Quercus</i>     | <i>Quercus phillyraeoides</i> | AB650425 |
| Eudicotyledons | Fagaceae      | <i>Quercus</i>     | <i>Quercus phillyraeoides</i> | AB650426 |
| Eudicotyledons | Fagaceae      | <i>Quercus</i>     | <i>Quercus phillyraeoides</i> | AB650427 |
| Eudicotyledons | Fagaceae      | <i>Quercus</i>     | <i>Quercus phillyraeoides</i> | AB650428 |
| Eudicotyledons | Fagaceae      | <i>Quercus</i>     | <i>Quercus phillyraeoides</i> | AB650429 |
| Eudicotyledons | Fagaceae      | <i>Quercus</i>     | <i>Quercus phillyraeoides</i> | AB650430 |
| Eudicotyledons | Fagaceae      | <i>Quercus</i>     | <i>Quercus phillyraeoides</i> | AB650431 |
| Eudicotyledons | Fagaceae      | <i>Quercus</i>     | <i>Quercus phillyraeoides</i> | AB650432 |
| Eudicotyledons | Fagaceae      | <i>Quercus</i>     | <i>Quercus phillyraeoides</i> | AB650433 |
| Eudicotyledons | Fagaceae      | <i>Quercus</i>     | <i>Quercus phillyraeoides</i> | AB650434 |
| Eudicotyledons | Fagaceae      | <i>Quercus</i>     | <i>Quercus phillyraeoides</i> | AB650435 |
| Eudicotyledons | Fagaceae      | <i>Quercus</i>     | <i>Quercus phillyraeoides</i> | AB650436 |
| Eudicotyledons | Fagaceae      | <i>Quercus</i>     | <i>Quercus phillyraeoides</i> | AB650437 |
| Eudicotyledons | Fagaceae      | <i>Quercus</i>     | <i>Quercus phillyraeoides</i> | AB650438 |
| Eudicotyledons | Fagaceae      | <i>Quercus</i>     | <i>Quercus phillyraeoides</i> | AB650439 |
| Eudicotyledons | Fagaceae      | <i>Quercus</i>     | <i>Quercus phillyraeoides</i> | AB650440 |
| Eudicotyledons | Fagaceae      | <i>Quercus</i>     | <i>Quercus phillyraeoides</i> | AB650441 |
| Eudicotyledons | Fagaceae      | <i>Quercus</i>     | <i>Quercus phillyraeoides</i> | AB650442 |
| Eudicotyledons | Fagaceae      | <i>Quercus</i>     | <i>Quercus phillyraeoides</i> | AB650443 |
| Eudicotyledons | Fagaceae      | <i>Quercus</i>     | <i>Quercus phillyraeoides</i> | AB650444 |
| Eudicotyledons | Fagaceae      | <i>Quercus</i>     | <i>Quercus phillyraeoides</i> | AB650445 |
| Eudicotyledons | Fagaceae      | <i>Quercus</i>     | <i>Quercus phillyraeoides</i> | AB650446 |
| Eudicotyledons | Fagaceae      | <i>Quercus</i>     | <i>Quercus phillyraeoides</i> | AB650447 |
| Eudicotyledons | Fagaceae      | <i>Quercus</i>     | <i>Quercus phillyraeoides</i> | AB650448 |
| Eudicotyledons | Fagaceae      | <i>Quercus</i>     | <i>Quercus phillyraeoides</i> | AB650449 |
| Eudicotyledons | Fagaceae      | <i>Quercus</i>     | <i>Quercus phillyraeoides</i> | AB650450 |
| Eudicotyledons | Fagaceae      | <i>Quercus</i>     | <i>Quercus phillyraeoides</i> | AB650451 |
| Eudicotyledons | Fagaceae      | <i>Quercus</i>     | <i>Quercus phillyraeoides</i> | AB650452 |
| Eudicotyledons | Fagaceae      | <i>Quercus</i>     | <i>Quercus phillyraeoides</i> | AB650453 |
| Eudicotyledons | Fagaceae      | <i>Quercus</i>     | <i>Quercus phillyraeoides</i> | AB650454 |
| Eudicotyledons | Fagaceae      | <i>Quercus</i>     | <i>Quercus phillyraeoides</i> | AB650455 |
| Eudicotyledons | Fagaceae      | <i>Quercus</i>     | <i>Quercus phillyraeoides</i> | AB650456 |
| Eudicotyledons | Fagaceae      | <i>Quercus</i>     | <i>Quercus phillyraeoides</i> | AB650457 |
| Eudicotyledons | Fagaceae      | <i>Quercus</i>     | <i>Quercus phillyraeoides</i> | AB650458 |
| Eudicotyledons | Fagaceae      | <i>Quercus</i>     | <i>Quercus phillyraeoides</i> | AB650459 |
| Eudicotyledons | Fagaceae      | <i>Quercus</i>     | <i>Quercus phillyraeoides</i> | AB650460 |
| Eudicotyledons | Fagaceae      | <i>Quercus</i>     | <i>Quercus phillyraeoides</i> | AB650461 |
| Eudicotyledons | Fagaceae      | <i>Quercus</i>     | <i>Quercus phillyraeoides</i> | AB650462 |
| Eudicotyledons | Fagaceae      | <i>Quercus</i>     | <i>Quercus phillyraeoides</i> | AB650463 |
| Eudicotyledons | Fagaceae      | <i>Quercus</i>     | <i>Quercus phillyraeoides</i> | AB650464 |
| Eudicotyledons | Fagaceae      | <i>Quercus</i>     | <i>Quercus phillyraeoides</i> | AB650465 |
| Eudicotyledons | Rosaceae      | <i>Sorbaria</i>    | <i>Sorbaria sorbifolia</i>    | JN047241 |
| Eudicotyledons | Rubiaceae     | <i>Galium</i>      | <i>Galium mollugo</i>         | FJ395515 |
| Eudicotyledons | Amaranthaceae | <i>Chenopodium</i> | <i>Chenopodium album</i>      | JN044279 |
| Eudicotyledons | Polygonaceae  | <i>Rumex</i>       | <i>Rumex acetosa</i>          | FJ395473 |
| Eudicotyledons | Asteraceae    | <i>Cirsium</i>     | <i>Cirsium arvense</i>        | FJ395528 |
| Eudicotyledons | Solanaceae    | <i>Solanum</i>     | <i>Solanum dulcamara</i>      | FJ395554 |

|                |                 |                      |                               |          |
|----------------|-----------------|----------------------|-------------------------------|----------|
| Eudicotyledons | Aquifoliaceae   | <i>Ilex</i>          | <i>Ilex latifolia</i>         | JN044947 |
| Eudicotyledons | Aquifoliaceae   | <i>Ilex</i>          | <i>Ilex latifolia</i>         | JN044948 |
| Eudicotyledons | Aquifoliaceae   | <i>Ilex</i>          | <i>Ilex latifolia</i>         | JN044949 |
| Eudicotyledons | Aquifoliaceae   | <i>Ilex</i>          | <i>Ilex latifolia</i>         | JN044950 |
| Eudicotyledons | Fabaceae        | <i>Trifolium</i>     | <i>Trifolium pratense</i>     | FJ395480 |
| Eudicotyledons | Rosaceae        | <i>Rosa</i>          | <i>Rosa canina</i>            | FJ395548 |
| Eudicotyledons | Asteraceae      | <i>Jacobaea</i>      | <i>Jacobaea vulgaris</i>      | FJ395449 |
| Eudicotyledons | Rosaceae        | <i>Prunus</i>        | <i>Prunus spinosa</i>         | FJ395549 |
| Eudicotyledons | Rosaceae        | <i>Prunus</i>        | <i>Prunus spinosa</i>         | FR865110 |
| Eudicotyledons | Asteraceae      | <i>Arctium</i>       | <i>Arctium minus</i>          | FJ395501 |
| Eudicotyledons | Polygonaceae    | <i>Rumex</i>         | <i>Rumex crispus</i>          | FJ395508 |
| Eudicotyledons | Polygonaceae    | <i>Rumex</i>         | <i>Rumex crispus</i>          | JN047048 |
| Eudicotyledons | Polygonaceae    | <i>Rumex</i>         | <i>Rumex crispus</i>          | JN047049 |
| Eudicotyledons | Polygonaceae    | <i>Rumex</i>         | <i>Rumex nepalensis</i>       | JN047051 |
| Eudicotyledons | Polygonaceae    | <i>Rumex</i>         | <i>Rumex nepalensis</i>       | JN047052 |
| Eudicotyledons | Grossulariaceae | <i>Ribes</i>         | <i>Ribes rubrum</i>           | FJ395461 |
| Eudicotyledons | Aquifoliaceae   | <i>Ilex</i>          | <i>Ilex kaushue</i>           | JN044944 |
| Eudicotyledons | Aquifoliaceae   | <i>Ilex</i>          | <i>Ilex kaushue</i>           | JN044945 |
| Eudicotyledons | Aquifoliaceae   | <i>Ilex</i>          | <i>Ilex kaushue</i>           | JN044946 |
| Eudicotyledons | Aquifoliaceae   | <i>Ilex</i>          | <i>Ilex pentagona</i>         | JN044951 |
| Eudicotyledons | Aquifoliaceae   | <i>Ilex</i>          | <i>Ilex pentagona</i>         | JN044952 |
| Eudicotyledons | Aquifoliaceae   | <i>Ilex</i>          | <i>Ilex pentagona</i>         | JN044953 |
| Eudicotyledons | Asteraceae      | <i>Sonchus</i>       | <i>Sonchus asper</i>          | FJ395510 |
| Eudicotyledons | Polygonaceae    | <i>Polygonum</i>     | <i>Polygonum aviculare</i>    | FJ395458 |
| Eudicotyledons | Apiaceae        | <i>Pleurospermum</i> | <i>Pleurospermum giraldii</i> | JN046389 |
| Eudicotyledons | Apiaceae        | <i>Pleurospermum</i> | <i>Pleurospermum giraldii</i> | JN046390 |
| Eudicotyledons | Apiaceae        | <i>Pleurospermum</i> | <i>Pleurospermum giraldii</i> | JN046391 |
| Eudicotyledons | Apiaceae        | <i>Pleurospermum</i> | <i>Pleurospermum giraldii</i> | JN046392 |
| Eudicotyledons | Zygophyllaceae  | <i>Larrea</i>        | <i>Larrea tridentata</i>      | JF266708 |
| Eudicotyledons | Zygophyllaceae  | <i>Larrea</i>        | <i>Larrea tridentata</i>      | JF266709 |
| Eudicotyledons | Zygophyllaceae  | <i>Larrea</i>        | <i>Larrea tridentata</i>      | JF266710 |
| Eudicotyledons | Zygophyllaceae  | <i>Larrea</i>        | <i>Larrea tridentata</i>      | JF266711 |
| Eudicotyledons | Zygophyllaceae  | <i>Larrea</i>        | <i>Larrea tridentata</i>      | JF266712 |
| Eudicotyledons | Zygophyllaceae  | <i>Larrea</i>        | <i>Larrea tridentata</i>      | JF266713 |
| Eudicotyledons | Zygophyllaceae  | <i>Larrea</i>        | <i>Larrea tridentata</i>      | JF266714 |
| Eudicotyledons | Zygophyllaceae  | <i>Larrea</i>        | <i>Larrea tridentata</i>      | JF266715 |
| Eudicotyledons | Zygophyllaceae  | <i>Larrea</i>        | <i>Larrea tridentata</i>      | JF266716 |
| Eudicotyledons | Zygophyllaceae  | <i>Larrea</i>        | <i>Larrea tridentata</i>      | JF266717 |
| Eudicotyledons | Zygophyllaceae  | <i>Larrea</i>        | <i>Larrea tridentata</i>      | JF266718 |
| Eudicotyledons | Zygophyllaceae  | <i>Larrea</i>        | <i>Larrea tridentata</i>      | JF266719 |
| Eudicotyledons | Zygophyllaceae  | <i>Larrea</i>        | <i>Larrea tridentata</i>      | JF266720 |
| Eudicotyledons | Zygophyllaceae  | <i>Larrea</i>        | <i>Larrea tridentata</i>      | JF266721 |
| Eudicotyledons | Zygophyllaceae  | <i>Larrea</i>        | <i>Larrea tridentata</i>      | JF266722 |
| Eudicotyledons | Zygophyllaceae  | <i>Larrea</i>        | <i>Larrea tridentata</i>      | JF266723 |
| Eudicotyledons | Zygophyllaceae  | <i>Larrea</i>        | <i>Larrea tridentata</i>      | JF266724 |
| Eudicotyledons | Zygophyllaceae  | <i>Larrea</i>        | <i>Larrea tridentata</i>      | JF266725 |
| Eudicotyledons | Zygophyllaceae  | <i>Larrea</i>        | <i>Larrea tridentata</i>      | JF266726 |
| Eudicotyledons | Zygophyllaceae  | <i>Larrea</i>        | <i>Larrea tridentata</i>      | JF266727 |
| Eudicotyledons | Zygophyllaceae  | <i>Larrea</i>        | <i>Larrea tridentata</i>      | JF266728 |
| Eudicotyledons | Zygophyllaceae  | <i>Larrea</i>        | <i>Larrea tridentata</i>      | JF266729 |
| Eudicotyledons | Zygophyllaceae  | <i>Larrea</i>        | <i>Larrea tridentata</i>      | JF266730 |
| Eudicotyledons | Zygophyllaceae  | <i>Larrea</i>        | <i>Larrea tridentata</i>      | JF266731 |
| Eudicotyledons | Zygophyllaceae  | <i>Larrea</i>        | <i>Larrea tridentata</i>      | JF266732 |



|                |                |                    |                              |          |
|----------------|----------------|--------------------|------------------------------|----------|
| Eudicotyledons | Zygophyllaceae | <i>Larrea</i>      | <i>Larrea tridentata</i>     | JF266791 |
| Eudicotyledons | Zygophyllaceae | <i>Larrea</i>      | <i>Larrea tridentata</i>     | JF266792 |
| Eudicotyledons | Zygophyllaceae | <i>Larrea</i>      | <i>Larrea tridentata</i>     | JF266793 |
| Eudicotyledons | Zygophyllaceae | <i>Larrea</i>      | <i>Larrea tridentata</i>     | JF266794 |
| Eudicotyledons | Zygophyllaceae | <i>Larrea</i>      | <i>Larrea tridentata</i>     | JF266795 |
| Eudicotyledons | Zygophyllaceae | <i>Larrea</i>      | <i>Larrea tridentata</i>     | JF266796 |
| Eudicotyledons | Zygophyllaceae | <i>Larrea</i>      | <i>Larrea tridentata</i>     | JF266797 |
| Eudicotyledons | Zygophyllaceae | <i>Larrea</i>      | <i>Larrea tridentata</i>     | JF266798 |
| Eudicotyledons | Zygophyllaceae | <i>Larrea</i>      | <i>Larrea tridentata</i>     | JF266799 |
| Eudicotyledons | Zygophyllaceae | <i>Larrea</i>      | <i>Larrea tridentata</i>     | JF266800 |
| Eudicotyledons | Zygophyllaceae | <i>Larrea</i>      | <i>Larrea tridentata</i>     | JF266801 |
| Eudicotyledons | Zygophyllaceae | <i>Larrea</i>      | <i>Larrea tridentata</i>     | JF266802 |
| Eudicotyledons | Zygophyllaceae | <i>Larrea</i>      | <i>Larrea tridentata</i>     | JF266803 |
| Eudicotyledons | Zygophyllaceae | <i>Larrea</i>      | <i>Larrea tridentata</i>     | JF266804 |
| Eudicotyledons | Zygophyllaceae | <i>Larrea</i>      | <i>Larrea tridentata</i>     | JF266805 |
| Eudicotyledons | Zygophyllaceae | <i>Larrea</i>      | <i>Larrea tridentata</i>     | JF266806 |
| Eudicotyledons | Zygophyllaceae | <i>Larrea</i>      | <i>Larrea tridentata</i>     | JF266807 |
| Eudicotyledons | Zygophyllaceae | <i>Larrea</i>      | <i>Larrea tridentata</i>     | JF266808 |
| Eudicotyledons | Zygophyllaceae | <i>Larrea</i>      | <i>Larrea tridentata</i>     | JF266809 |
| Eudicotyledons | Zygophyllaceae | <i>Larrea</i>      | <i>Larrea tridentata</i>     | JF266810 |
| Eudicotyledons | Zygophyllaceae | <i>Larrea</i>      | <i>Larrea tridentata</i>     | JF266811 |
| Eudicotyledons | Zygophyllaceae | <i>Larrea</i>      | <i>Larrea tridentata</i>     | JF266812 |
| Eudicotyledons | Zygophyllaceae | <i>Larrea</i>      | <i>Larrea tridentata</i>     | JF266813 |
| Eudicotyledons | Zygophyllaceae | <i>Larrea</i>      | <i>Larrea tridentata</i>     | JF266814 |
| Eudicotyledons | Zygophyllaceae | <i>Larrea</i>      | <i>Larrea tridentata</i>     | JF266815 |
| Eudicotyledons | Zygophyllaceae | <i>Larrea</i>      | <i>Larrea tridentata</i>     | JF266816 |
| Eudicotyledons | Zygophyllaceae | <i>Larrea</i>      | <i>Larrea tridentata</i>     | JF266817 |
| Eudicotyledons | Zygophyllaceae | <i>Larrea</i>      | <i>Larrea tridentata</i>     | JF266818 |
| Eudicotyledons | Zygophyllaceae | <i>Larrea</i>      | <i>Larrea tridentata</i>     | JF266819 |
| Eudicotyledons | Zygophyllaceae | <i>Larrea</i>      | <i>Larrea nitida</i>         | JF266822 |
| Eudicotyledons | Zygophyllaceae | <i>Larrea</i>      | <i>Larrea nitida</i>         | JF266824 |
| Monocotyledons | Juncaceae      | <i>Juncus</i>      | <i>Juncus effusus</i>        | HQ596739 |
| Monocotyledons | Juncaceae      | <i>Juncus</i>      | <i>Juncus effusus</i>        | GQ434955 |
| Monocotyledons | Juncaceae      | <i>Juncus</i>      | <i>Juncus effusus</i>        | GQ434956 |
| Monocotyledons | Arecaceae      | <i>Sabal</i>       | <i>Sabal minor</i>           | GQ248388 |
| Monocotyledons | Arecaceae      | <i>Sabal</i>       | <i>Sabal minor</i>           | EF688519 |
| Monocotyledons | Asparagaceae   | <i>Polygonatum</i> | <i>Polygonatum humile</i>    | JN046415 |
| Monocotyledons | Asparagaceae   | <i>Polygonatum</i> | <i>Polygonatum humile</i>    | JN046416 |
| Monocotyledons | Asparagaceae   | <i>Polygonatum</i> | <i>Polygonatum humile</i>    | JN046417 |
| Monocotyledons | Asparagaceae   | <i>Polygonatum</i> | <i>Polygonatum humile</i>    | JN046418 |
| Monocotyledons | Asparagaceae   | <i>Maianthemum</i> | <i>Maianthemum racemosum</i> | HQ596763 |
| Monocotyledons | Asparagaceae   | <i>Maianthemum</i> | <i>Maianthemum racemosum</i> | EU850237 |
| Monocotyledons | Asparagaceae   | <i>Maianthemum</i> | <i>Maianthemum racemosum</i> | EU850238 |
| Monocotyledons | Asparagaceae   | <i>Maianthemum</i> | <i>Maianthemum racemosum</i> | JN045467 |
| Monocotyledons | Asparagaceae   | <i>Maianthemum</i> | <i>Maianthemum racemosum</i> | JN045468 |
| Monocotyledons | Colchicaceae   | <i>Colchicum</i>   | <i>Colchicum autumnale</i>   | JF934069 |
| Monocotyledons | Bromeliaceae   | <i>Aechmea</i>     | <i>Aechmea allenii</i>       | EF110654 |
| Monocotyledons | Bromeliaceae   | <i>Aechmea</i>     | <i>Aechmea allenii</i>       | HQ913722 |
| Monocotyledons | Poaceae        | <i>Elymus</i>      | <i>Elymus repens</i>         | FJ395519 |
| Monocotyledons | Poaceae        | <i>Elymus</i>      | <i>Elymus repens</i>         | HQ596680 |
| Monocotyledons | Poaceae        | <i>Elymus</i>      | <i>Elymus repens</i>         | EU531722 |
| Monocotyledons | Poaceae        | <i>Stipa</i>       | <i>Stipa parviflora</i>      | EU204777 |
| Monocotyledons | Poaceae        | <i>Stipa</i>       | <i>Stipa parviflora</i>      | EU204778 |

|                |              |                    |                                 |          |
|----------------|--------------|--------------------|---------------------------------|----------|
| Monocotyledons | Poaceae      | <i>Elymus</i>      | <i>Elymus sibiricus</i>         | HQ221837 |
| Monocotyledons | Poaceae      | <i>Elymus</i>      | <i>Elymus sibiricus</i>         | HQ221842 |
| Monocotyledons | Poaceae      | <i>Zizania</i>     | <i>Zizania latifolia</i>        | GU177392 |
| Monocotyledons | Poaceae      | <i>Zizania</i>     | <i>Zizania latifolia</i>        | GU177393 |
| Monocotyledons | Poaceae      | <i>Agrostis</i>    | <i>Agrostis stolonifera</i>     | HQ596586 |
| Monocotyledons | Poaceae      | <i>Agrostis</i>    | <i>Agrostis stolonifera</i>     | HQ596587 |
| Monocotyledons | Cyperaceae   | <i>Carex</i>       | <i>Carex laxiflora</i>          | HQ596627 |
| Monocotyledons | Cyperaceae   | <i>Carex</i>       | <i>Carex laxiflora</i>          | HQ596628 |
| Monocotyledons | Poaceae      | <i>Zizania</i>     | <i>Zizania aquatica</i>         | GU177368 |
| Monocotyledons | Poaceae      | <i>Zizania</i>     | <i>Zizania aquatica</i>         | GU177376 |
| Monocotyledons | Poaceae      | <i>Zizania</i>     | <i>Zizania aquatica</i>         | GU177377 |
| Monocotyledons | Poaceae      | <i>Zizania</i>     | <i>Zizania aquatica</i>         | GU177378 |
| Monocotyledons | Poaceae      | <i>Zizania</i>     | <i>Zizania aquatica</i>         | GU177379 |
| Monocotyledons | Poaceae      | <i>Zizania</i>     | <i>Zizania aquatica</i>         | GU177380 |
| Monocotyledons | Poaceae      | <i>Zizania</i>     | <i>Zizania aquatica</i>         | GU177381 |
| Monocotyledons | Poaceae      | <i>Zizania</i>     | <i>Zizania aquatica</i>         | GU177382 |
| Monocotyledons | Poaceae      | <i>Zizania</i>     | <i>Zizania aquatica</i>         | GU177386 |
| Monocotyledons | Poaceae      | <i>Zizania</i>     | <i>Zizania aquatica</i>         | GU177387 |
| Monocotyledons | Poaceae      | <i>Zizania</i>     | <i>Zizania aquatica</i>         | GU177388 |
| Monocotyledons | Poaceae      | <i>Zizania</i>     | <i>Zizania aquatica</i>         | GU177390 |
| Monocotyledons | Orchidaceae  | <i>Cymbidium</i>   | <i>Cymbidium ensifolium</i>     | FJ527765 |
| Monocotyledons | Orchidaceae  | <i>Cymbidium</i>   | <i>Cymbidium ensifolium</i>     | FJ527766 |
| Monocotyledons | Asparagaceae | <i>Polygonatum</i> | <i>Polygonatum odoratum</i>     | GQ434924 |
| Monocotyledons | Asparagaceae | <i>Polygonatum</i> | <i>Polygonatum odoratum</i>     | GQ434925 |
| Monocotyledons | Asparagaceae | <i>Polygonatum</i> | <i>Polygonatum cirrhifolium</i> | EU850212 |
| Monocotyledons | Asparagaceae | <i>Polygonatum</i> | <i>Polygonatum cirrhifolium</i> | JN046400 |
| Monocotyledons | Asparagaceae | <i>Polygonatum</i> | <i>Polygonatum cirrhifolium</i> | JN046401 |
| Monocotyledons | Asparagaceae | <i>Polygonatum</i> | <i>Polygonatum cirrhifolium</i> | JN046402 |
| Monocotyledons | Asparagaceae | <i>Polygonatum</i> | <i>Polygonatum cirrhifolium</i> | JN046403 |
| Monocotyledons | Asparagaceae | <i>Polygonatum</i> | <i>Polygonatum cirrhifolium</i> | JN046404 |
| Monocotyledons | Asparagaceae | <i>Polygonatum</i> | <i>Polygonatum cirrhifolium</i> | JN046405 |
| Monocotyledons | Asparagaceae | <i>Polygonatum</i> | <i>Polygonatum cirrhifolium</i> | JN046406 |
| Monocotyledons | Asparagaceae | <i>Polygonatum</i> | <i>Polygonatum cirrhifolium</i> | JN046407 |
| Monocotyledons | Asparagaceae | <i>Polygonatum</i> | <i>Polygonatum cirrhifolium</i> | JN046408 |
| Monocotyledons | Asparagaceae | <i>Polygonatum</i> | <i>Polygonatum cirrhifolium</i> | JN046409 |
| Monocotyledons | Asparagaceae | <i>Polygonatum</i> | <i>Polygonatum cirrhifolium</i> | JN046410 |
| Monocotyledons | Asparagaceae | <i>Polygonatum</i> | <i>Polygonatum cirrhifolium</i> | JN046411 |
| Monocotyledons | Asparagaceae | <i>Polygonatum</i> | <i>Polygonatum cirrhifolium</i> | JN046412 |
| Monocotyledons | Asparagaceae | <i>Maianthemum</i> | <i>Maianthemum japonicum</i>    | GQ434900 |
| Monocotyledons | Asparagaceae | <i>Maianthemum</i> | <i>Maianthemum japonicum</i>    | EU850231 |
| Monocotyledons | Asparagaceae | <i>Maianthemum</i> | <i>Maianthemum japonicum</i>    | EU850232 |
| Monocotyledons | Asparagaceae | <i>Maianthemum</i> | <i>Maianthemum japonicum</i>    | EU850240 |
| Monocotyledons | Asparagaceae | <i>Maianthemum</i> | <i>Maianthemum japonicum</i>    | JN045454 |
| Monocotyledons | Asparagaceae | <i>Maianthemum</i> | <i>Maianthemum japonicum</i>    | JN045455 |
| Monocotyledons | Asparagaceae | <i>Maianthemum</i> | <i>Maianthemum japonicum</i>    | JN045456 |
| Monocotyledons | Asparagaceae | <i>Maianthemum</i> | <i>Maianthemum japonicum</i>    | JN045457 |
| Monocotyledons | Asparagaceae | <i>Maianthemum</i> | <i>Maianthemum japonicum</i>    | JN045458 |
| Monocotyledons | Asparagaceae | <i>Maianthemum</i> | <i>Maianthemum japonicum</i>    | JN045459 |
| Monocotyledons | Poaceae      | <i>Zizania</i>     | <i>Zizania palustris</i>        | GU177369 |
| Monocotyledons | Poaceae      | <i>Zizania</i>     | <i>Zizania palustris</i>        | GU177370 |
| Monocotyledons | Poaceae      | <i>Zizania</i>     | <i>Zizania palustris</i>        | GU177371 |
| Monocotyledons | Poaceae      | <i>Zizania</i>     | <i>Zizania palustris</i>        | GU177372 |
| Monocotyledons | Poaceae      | <i>Zizania</i>     | <i>Zizania palustris</i>        | GU177373 |

|                |               |                     |                                  |          |
|----------------|---------------|---------------------|----------------------------------|----------|
| Monocotyledons | Poaceae       | <i>Zizania</i>      | <i>Zizania palustris</i>         | GU177374 |
| Monocotyledons | Poaceae       | <i>Zizania</i>      | <i>Zizania palustris</i>         | GU177375 |
| Monocotyledons | Poaceae       | <i>Zizania</i>      | <i>Zizania palustris</i>         | GU177383 |
| Monocotyledons | Poaceae       | <i>Zizania</i>      | <i>Zizania palustris</i>         | GU177384 |
| Monocotyledons | Poaceae       | <i>Zizania</i>      | <i>Zizania palustris</i>         | GU177385 |
| Monocotyledons | Poaceae       | <i>Zizania</i>      | <i>Zizania palustris</i>         | GU177389 |
| Monocotyledons | Bromeliaceae  | <i>Aechmea</i>      | <i>Aechmea distichantha</i>      | JN204613 |
| Monocotyledons | Bromeliaceae  | <i>Aechmea</i>      | <i>Aechmea distichantha</i>      | JN204614 |
| Monocotyledons | Zingiberaceae | <i>Gagnepainia</i>  | <i>Gagnepainia godefroyi</i>     | GQ386049 |
| Monocotyledons | Zingiberaceae | <i>Gagnepainia</i>  | <i>Gagnepainia godefroyi</i>     | GQ386050 |
| Monocotyledons | Arecaceae     | <i>Arenga</i>       | <i>Arenga hookeriana</i>         | JF345017 |
| Monocotyledons | Arecaceae     | <i>Arenga</i>       | <i>Arenga hookeriana</i>         | JF345025 |
| Monocotyledons | Arecaceae     | <i>Arenga</i>       | <i>Arenga hookeriana</i>         | JF345026 |
| Monocotyledons | Arecaceae     | <i>Arenga</i>       | <i>Arenga hookeriana</i>         | JF345027 |
| Monocotyledons | Arecaceae     | <i>Arenga</i>       | <i>Arenga hookeriana</i>         | JF345028 |
| Monocotyledons | Arecaceae     | <i>Wallichia</i>    | <i>Wallichia disticha</i>        | JF345073 |
| Monocotyledons | Arecaceae     | <i>Wallichia</i>    | <i>Wallichia disticha</i>        | JF345074 |
| Monocotyledons | Orchidaceae   | <i>Cischweinfia</i> | <i>Cischweinfia dasyandra</i>    | FJ564133 |
| Monocotyledons | Orchidaceae   | <i>Cischweinfia</i> | <i>Cischweinfia dasyandra</i>    | FJ564646 |
| Monocotyledons | Orchidaceae   | <i>Cuitlauzina</i>  | <i>Cuitlauzina pendula</i>       | FJ564076 |
| Monocotyledons | Orchidaceae   | <i>Cuitlauzina</i>  | <i>Cuitlauzina pendula</i>       | FJ564664 |
| Monocotyledons | Orchidaceae   | <i>Fernandezia</i>  | <i>Fernandezia ionanthera</i>    | FJ564101 |
| Monocotyledons | Orchidaceae   | <i>Fernandezia</i>  | <i>Fernandezia ionanthera</i>    | FJ564527 |
| Monocotyledons | Orchidaceae   | <i>Lockhartia</i>   | <i>Lockhartia oerstedii</i>      | EU213746 |
| Monocotyledons | Orchidaceae   | <i>Lockhartia</i>   | <i>Lockhartia oerstedii</i>      | FJ563978 |
| Monocotyledons | Arecaceae     | <i>Arenga</i>       | <i>Arenga caudata</i>            | JF345007 |
| Monocotyledons | Arecaceae     | <i>Arenga</i>       | <i>Arenga caudata</i>            | JF345008 |
| Monocotyledons | Arecaceae     | <i>Arenga</i>       | <i>Arenga caudata</i>            | JF345009 |
| Monocotyledons | Arecaceae     | <i>Arenga</i>       | <i>Arenga caudata</i>            | JF345010 |
| Monocotyledons | Arecaceae     | <i>Arenga</i>       | <i>Arenga caudata</i>            | JF345011 |
| Monocotyledons | Arecaceae     | <i>Arenga</i>       | <i>Arenga caudata</i>            | JF345012 |
| Monocotyledons | Arecaceae     | <i>Arenga</i>       | <i>Arenga caudata</i>            | JF345013 |
| Monocotyledons | Arecaceae     | <i>Arenga</i>       | <i>Arenga caudata</i>            | JF345014 |
| Monocotyledons | Arecaceae     | <i>Arenga</i>       | <i>Arenga caudata</i>            | JF345015 |
| Monocotyledons | Arecaceae     | <i>Arenga</i>       | <i>Arenga caudata</i>            | JF345016 |
| Monocotyledons | Arecaceae     | <i>Arenga</i>       | <i>Arenga undulatifolia</i>      | JF345039 |
| Monocotyledons | Arecaceae     | <i>Arenga</i>       | <i>Arenga undulatifolia</i>      | JF345040 |
| Monocotyledons | Orchidaceae   | <i>Prosthechea</i>  | <i>Prosthechea cochleata</i>     | EU213757 |
| Monocotyledons | Orchidaceae   | <i>Prosthechea</i>  | <i>Prosthechea cochleata</i>     | EU213758 |
| Monocotyledons | Arecaceae     | <i>Hyphaene</i>     | <i>Hyphaene coriacea</i>         | EU213775 |
| Monocotyledons | Arecaceae     | <i>Hyphaene</i>     | <i>Hyphaene coriacea</i>         | EU213776 |
| Monocotyledons | Arecaceae     | <i>Hyphaene</i>     | <i>Hyphaene coriacea</i>         | EU213777 |
| Monocotyledons | Arecaceae     | <i>Hyphaene</i>     | <i>Hyphaene coriacea</i>         | EU213778 |
| Monocotyledons | Orchidaceae   | <i>Rhynchochloa</i> | <i>Rhynchochloa beloglossa</i>   | EU213707 |
| Monocotyledons | Orchidaceae   | <i>Rhynchochloa</i> | <i>Rhynchochloa beloglossa</i>   | FJ564093 |
| Monocotyledons | Orchidaceae   | <i>Rhynchochloa</i> | <i>Rhynchochloa beloglossa</i>   | FJ564134 |
| Monocotyledons | Orchidaceae   | <i>Comparettia</i>  | <i>Comparettia macroplectron</i> | FJ564052 |
| Monocotyledons | Orchidaceae   | <i>Comparettia</i>  | <i>Comparettia macroplectron</i> | FJ564656 |
| Monocotyledons | Orchidaceae   | <i>Cyrtorchilum</i> | <i>Cyrtorchilum cimiciferum</i>  | FJ563997 |
| Monocotyledons | Orchidaceae   | <i>Cyrtorchilum</i> | <i>Cyrtorchilum cimiciferum</i>  | FJ564239 |
| Monocotyledons | Orchidaceae   | <i>Cyrtorchilum</i> | <i>Cyrtorchilum cimiciferum</i>  | FJ564518 |
| Monocotyledons | Orchidaceae   | <i>Cyrtorchilum</i> | <i>Cyrtorchilum edwardii</i>     | FJ564091 |
| Monocotyledons | Orchidaceae   | <i>Cyrtorchilum</i> | <i>Cyrtorchilum edwardii</i>     | FJ564669 |

|                |             |                     |                                  |          |
|----------------|-------------|---------------------|----------------------------------|----------|
| Monocotyledons | Orchidaceae | <i>Erycina</i>      | <i>Erycina crista-galli</i>      | EU213751 |
| Monocotyledons | Orchidaceae | <i>Erycina</i>      | <i>Erycina crista-galli</i>      | FJ564144 |
| Monocotyledons | Orchidaceae | <i>Erycina</i>      | <i>Erycina echinata</i>          | FJ564063 |
| Monocotyledons | Orchidaceae | <i>Erycina</i>      | <i>Erycina echinata</i>          | FJ564434 |
| Monocotyledons | Orchidaceae | <i>Erycina</i>      | <i>Erycina hyalinobulbon</i>     | FJ564026 |
| Monocotyledons | Orchidaceae | <i>Erycina</i>      | <i>Erycina hyalinobulbon</i>     | FJ564435 |
| Monocotyledons | Orchidaceae | <i>Erycina</i>      | <i>Erycina pumilio</i>           | EU213737 |
| Monocotyledons | Orchidaceae | <i>Erycina</i>      | <i>Erycina pumilio</i>           | EU213738 |
| Monocotyledons | Orchidaceae | <i>Erycina</i>      | <i>Erycina pumilio</i>           | FJ564149 |
| Monocotyledons | Orchidaceae | <i>Erycina</i>      | <i>Erycina pumilio</i>           | FJ564556 |
| Monocotyledons | Orchidaceae | <i>Erycina</i>      | <i>Erycina pusilla</i>           | FJ564021 |
| Monocotyledons | Orchidaceae | <i>Erycina</i>      | <i>Erycina pusilla</i>           | FJ564542 |
| Monocotyledons | Orchidaceae | <i>Ionopsis</i>     | <i>Ionopsis minutiflora</i>      | FJ564136 |
| Monocotyledons | Orchidaceae | <i>Ionopsis</i>     | <i>Ionopsis minutiflora</i>      | FJ564462 |
| Monocotyledons | Orchidaceae | <i>Ionopsis</i>     | <i>Ionopsis minutiflora</i>      | FJ564565 |
| Monocotyledons | Orchidaceae | <i>Ionopsis</i>     | <i>Ionopsis satyrioides</i>      | FJ564135 |
| Monocotyledons | Orchidaceae | <i>Ionopsis</i>     | <i>Ionopsis satyrioides</i>      | FJ564266 |
| Monocotyledons | Orchidaceae | <i>Ionopsis</i>     | <i>Ionopsis utricularioides</i>  | FJ564022 |
| Monocotyledons | Orchidaceae | <i>Ionopsis</i>     | <i>Ionopsis utricularioides</i>  | FJ564559 |
| Monocotyledons | Orchidaceae | <i>Gomesa</i>       | <i>Gomesa flexuosa</i>           | FJ564049 |
| Monocotyledons | Orchidaceae | <i>Gomesa</i>       | <i>Gomesa flexuosa</i>           | FJ564546 |
| Monocotyledons | Orchidaceae | <i>Gomesa</i>       | <i>Gomesa flexuosa</i>           | FJ564662 |
| Monocotyledons | Orchidaceae | <i>Rhynchostele</i> | <i>Rhynchostele bictoniensis</i> | GQ248385 |
| Monocotyledons | Orchidaceae | <i>Rhynchostele</i> | <i>Rhynchostele bictoniensis</i> | EU213764 |
| Monocotyledons | Orchidaceae | <i>Rhynchostele</i> | <i>Rhynchostele bictoniensis</i> | FJ564004 |
| Monocotyledons | Orchidaceae | <i>Tolumnia</i>     | <i>Tolumnia calochila</i>        | FJ564087 |
| Monocotyledons | Orchidaceae | <i>Tolumnia</i>     | <i>Tolumnia calochila</i>        | FJ564232 |
| Monocotyledons | Orchidaceae | <i>Trichopilia</i>  | <i>Trichopilia subulata</i>      | FJ564073 |
| Monocotyledons | Orchidaceae | <i>Trichopilia</i>  | <i>Trichopilia subulata</i>      | FJ564550 |
| Monocotyledons | Orchidaceae | <i>Cyrtochilum</i>  | <i>Cyrtochilum angustatum</i>    | FJ564068 |
| Monocotyledons | Orchidaceae | <i>Cyrtochilum</i>  | <i>Cyrtochilum angustatum</i>    | FJ564260 |
| Monocotyledons | Orchidaceae | <i>Cyrtochilum</i>  | <i>Cyrtochilum pardinum</i>      | FJ564092 |
| Monocotyledons | Orchidaceae | <i>Cyrtochilum</i>  | <i>Cyrtochilum pardinum</i>      | FJ564170 |
| Monocotyledons | Orchidaceae | <i>Cyrtochilum</i>  | <i>Cyrtochilum ramosissimum</i>  | FJ564056 |
| Monocotyledons | Orchidaceae | <i>Cyrtochilum</i>  | <i>Cyrtochilum ramosissimum</i>  | FJ564483 |
| Monocotyledons | Orchidaceae | <i>Cyrtochilum</i>  | <i>Cyrtochilum tricostatum</i>   | FJ564086 |
| Monocotyledons | Orchidaceae | <i>Cyrtochilum</i>  | <i>Cyrtochilum tricostatum</i>   | FJ564102 |
| Monocotyledons | Orchidaceae | <i>Cyrtochilum</i>  | <i>Cyrtochilum tricostatum</i>   | FJ564151 |
| Monocotyledons | Orchidaceae | <i>Cyrtochilum</i>  | <i>Cyrtochilum tricostatum</i>   | FJ564243 |
| Monocotyledons | Orchidaceae | <i>Cyrtochilum</i>  | <i>Cyrtochilum tricostatum</i>   | FJ564247 |
| Monocotyledons | Orchidaceae | <i>Cyrtochilum</i>  | <i>Cyrtochilum tricostatum</i>   | FJ564486 |
| Monocotyledons | Orchidaceae | <i>Miltoniopsis</i> | <i>Miltoniopsis vexillaria</i>   | FJ564060 |
| Monocotyledons | Orchidaceae | <i>Miltoniopsis</i> | <i>Miltoniopsis vexillaria</i>   | FJ564341 |
| Monocotyledons | Poaceae     | <i>Paspalum</i>     | <i>Paspalum quadrifarium</i>     | AY941123 |
| Monocotyledons | Poaceae     | <i>Paspalum</i>     | <i>Paspalum quadrifarium</i>     | AY941127 |
| Monocotyledons | Orchidaceae | <i>Caucaea</i>      | <i>Caucaea cucullata</i>         | FJ564196 |
| Monocotyledons | Orchidaceae | <i>Caucaea</i>      | <i>Caucaea cucullata</i>         | FJ564530 |
| Monocotyledons | Orchidaceae | <i>Caucaea</i>      | <i>Caucaea phalaenopsis</i>      | FJ564006 |
| Monocotyledons | Orchidaceae | <i>Caucaea</i>      | <i>Caucaea phalaenopsis</i>      | FJ564529 |
| Monocotyledons | Orchidaceae | <i>Caucaea</i>      | <i>Caucaea radiata</i>           | FJ564281 |
| Monocotyledons | Orchidaceae | <i>Caucaea</i>      | <i>Caucaea radiata</i>           | FJ564582 |
| Monocotyledons | Orchidaceae | <i>Cyrtochilum</i>  | <i>Cyrtochilum meirax</i>        | FJ564444 |
| Monocotyledons | Orchidaceae | <i>Cyrtochilum</i>  | <i>Cyrtochilum meirax</i>        | FJ564608 |



|                |               |                      |                                    |          |
|----------------|---------------|----------------------|------------------------------------|----------|
| Monocotyledons | Orchidaceae   | <i>Miltoniopsis</i>  | <i>Miltoniopsis bismarkii</i>      | FJ564469 |
| Monocotyledons | Orchidaceae   | <i>Miltoniopsis</i>  | <i>Miltoniopsis bismarkii</i>      | FJ564619 |
| Monocotyledons | Asparagaceae  | <i>Maianthemum</i>   | <i>Maianthemum bifolium</i>        | EU850234 |
| Monocotyledons | Asparagaceae  | <i>Maianthemum</i>   | <i>Maianthemum bifolium</i>        | EU850235 |
| Monocotyledons | Asparagaceae  | <i>Maianthemum</i>   | <i>Maianthemum bifolium</i>        | JN045441 |
| Monocotyledons | Asparagaceae  | <i>Maianthemum</i>   | <i>Maianthemum bifolium</i>        | JN045442 |
| Monocotyledons | Asparagaceae  | <i>Maianthemum</i>   | <i>Maianthemum bifolium</i>        | JN045443 |
| Monocotyledons | Zingiberaceae | <i>Gagnepainia</i>   | <i>Gagnepainia thoreliana</i>      | GQ386051 |
| Monocotyledons | Zingiberaceae | <i>Gagnepainia</i>   | <i>Gagnepainia thoreliana</i>      | GQ386052 |
| Monocotyledons | Zingiberaceae | <i>Gagnepainia</i>   | <i>Gagnepainia thoreliana</i>      | GQ386053 |
| Monocotyledons | Zingiberaceae | <i>Gagnepainia</i>   | <i>Gagnepainia thoreliana</i>      | GQ386054 |
| Monocotyledons | Poaceae       | <i>Dendrocalamus</i> | <i>Dendrocalamus strictus</i>      | GU391004 |
| Monocotyledons | Poaceae       | <i>Dendrocalamus</i> | <i>Dendrocalamus strictus</i>      | GU063120 |
| Monocotyledons | Orchidaceae   | <i>Prosthechea</i>   | <i>Prosthechea fragrans</i>        | EU213759 |
| Monocotyledons | Orchidaceae   | <i>Prosthechea</i>   | <i>Prosthechea fragrans</i>        | EU213760 |
| Monocotyledons | Orchidaceae   | <i>Cyrtochilum</i>   | <i>Cyrtochilum serratum</i>        | FJ564014 |
| Monocotyledons | Orchidaceae   | <i>Cyrtochilum</i>   | <i>Cyrtochilum serratum</i>        | FJ564123 |
| Monocotyledons | Asparagaceae  | <i>Polygonatum</i>   | <i>Polygonatum acuminatifolium</i> | JN046398 |
| Monocotyledons | Asparagaceae  | <i>Polygonatum</i>   | <i>Polygonatum acuminatifolium</i> | JN046399 |
| Monocotyledons | Asparagaceae  | <i>Polygonatum</i>   | <i>Polygonatum sibiricum</i>       | GQ434879 |
| Monocotyledons | Asparagaceae  | <i>Polygonatum</i>   | <i>Polygonatum sibiricum</i>       | GQ434880 |
| Monocotyledons | Asparagaceae  | <i>Polygonatum</i>   | <i>Polygonatum sibiricum</i>       | EU850210 |
| Monocotyledons | Asparagaceae  | <i>Polygonatum</i>   | <i>Polygonatum verticillatum</i>   | JN046419 |
| Monocotyledons | Asparagaceae  | <i>Polygonatum</i>   | <i>Polygonatum verticillatum</i>   | JN046420 |
| Monocotyledons | Asparagaceae  | <i>Polygonatum</i>   | <i>Polygonatum verticillatum</i>   | JN046421 |
| Monocotyledons | Asparagaceae  | <i>Polygonatum</i>   | <i>Polygonatum verticillatum</i>   | JN046422 |
| Monocotyledons | Asparagaceae  | <i>Maianthemum</i>   | <i>Maianthemum atropurpureum</i>   | EU850218 |
| Monocotyledons | Asparagaceae  | <i>Maianthemum</i>   | <i>Maianthemum atropurpureum</i>   | EU850219 |
| Monocotyledons | Asparagaceae  | <i>Maianthemum</i>   | <i>Maianthemum atropurpureum</i>   | EU850223 |
| Monocotyledons | Asparagaceae  | <i>Maianthemum</i>   | <i>Maianthemum atropurpureum</i>   | JN045433 |
| Monocotyledons | Asparagaceae  | <i>Maianthemum</i>   | <i>Maianthemum atropurpureum</i>   | JN045434 |
| Monocotyledons | Asparagaceae  | <i>Maianthemum</i>   | <i>Maianthemum atropurpureum</i>   | JN045435 |
| Monocotyledons | Asparagaceae  | <i>Maianthemum</i>   | <i>Maianthemum atropurpureum</i>   | JN045436 |
| Monocotyledons | Asparagaceae  | <i>Maianthemum</i>   | <i>Maianthemum atropurpureum</i>   | JN045437 |
| Monocotyledons | Asparagaceae  | <i>Maianthemum</i>   | <i>Maianthemum atropurpureum</i>   | JN045438 |
| Monocotyledons | Asparagaceae  | <i>Maianthemum</i>   | <i>Maianthemum atropurpureum</i>   | JN045439 |
| Monocotyledons | Asparagaceae  | <i>Maianthemum</i>   | <i>Maianthemum atropurpureum</i>   | JN045440 |
| Monocotyledons | Asparagaceae  | <i>Maianthemum</i>   | <i>Maianthemum paniculatum</i>     | EU850242 |
| Monocotyledons | Asparagaceae  | <i>Maianthemum</i>   | <i>Maianthemum paniculatum</i>     | EU850243 |
| Monocotyledons | Asparagaceae  | <i>Maianthemum</i>   | <i>Maianthemum purpureum</i>       | EU850221 |
| Monocotyledons | Asparagaceae  | <i>Maianthemum</i>   | <i>Maianthemum purpureum</i>       | JN045460 |
| Monocotyledons | Asparagaceae  | <i>Maianthemum</i>   | <i>Maianthemum purpureum</i>       | JN045461 |
| Monocotyledons | Asparagaceae  | <i>Maianthemum</i>   | <i>Maianthemum purpureum</i>       | JN045462 |
| Monocotyledons | Asparagaceae  | <i>Maianthemum</i>   | <i>Maianthemum purpureum</i>       | JN045463 |
| Monocotyledons | Asparagaceae  | <i>Maianthemum</i>   | <i>Maianthemum purpureum</i>       | JN045464 |
| Monocotyledons | Asparagaceae  | <i>Maianthemum</i>   | <i>Maianthemum purpureum</i>       | JN045465 |
| Monocotyledons | Asparagaceae  | <i>Maianthemum</i>   | <i>Maianthemum purpureum</i>       | JN045466 |
| Monocotyledons | Asparagaceae  | <i>Maianthemum</i>   | <i>Maianthemum tatsienense</i>     | EU850228 |
| Monocotyledons | Asparagaceae  | <i>Maianthemum</i>   | <i>Maianthemum tatsienense</i>     | JN045469 |
| Monocotyledons | Asparagaceae  | <i>Maianthemum</i>   | <i>Maianthemum tatsienense</i>     | JN045470 |
| Monocotyledons | Asparagaceae  | <i>Maianthemum</i>   | <i>Maianthemum tatsienense</i>     | JN045471 |
| Monocotyledons | Asparagaceae  | <i>Maianthemum</i>   | <i>Maianthemum tatsienense</i>     | JN045472 |
| Monocotyledons | Asparagaceae  | <i>Maianthemum</i>   | <i>Maianthemum tatsienense</i>     | JN045473 |

|                |              |                      |                                |          |
|----------------|--------------|----------------------|--------------------------------|----------|
| Monocotyledons | Asparagaceae | <i>Maianthemum</i>   | <i>Maianthemum tatsienense</i> | JN045474 |
| Monocotyledons | Asparagaceae | <i>Maianthemum</i>   | <i>Maianthemum tubiferum</i>   | EU850225 |
| Monocotyledons | Asparagaceae | <i>Maianthemum</i>   | <i>Maianthemum tubiferum</i>   | JN045475 |
| Monocotyledons | Colchicaceae | <i>Colchicum</i>     | <i>Colchicum filifolium</i>    | DQ088323 |
| Monocotyledons | Colchicaceae | <i>Colchicum</i>     | <i>Colchicum filifolium</i>    | JF934102 |
| Monocotyledons | Bromeliaceae | <i>Aechmea</i>       | <i>Aechmea nudicaulis</i>      | JN204618 |
| Monocotyledons | Bromeliaceae | <i>Aechmea</i>       | <i>Aechmea nudicaulis</i>      | JN204619 |
| Monocotyledons | Bromeliaceae | <i>Tillandsia</i>    | <i>Tillandsia tenuifolia</i>   | JN204667 |
| Monocotyledons | Bromeliaceae | <i>Tillandsia</i>    | <i>Tillandsia tenuifolia</i>   | JN204668 |
| Monocotyledons | Juncaceae    | <i>Juncus</i>        | <i>Juncus dudleyi</i>          | HQ596737 |
| Monocotyledons | Juncaceae    | <i>Juncus</i>        | <i>Juncus dudleyi</i>          | HQ596738 |
| Monocotyledons | Poaceae      | <i>Elymus</i>        | <i>Elymus brevipes</i>         | HQ221851 |
| Monocotyledons | Poaceae      | <i>Elymus</i>        | <i>Elymus brevipes</i>         | HQ652802 |
| Monocotyledons | Cyperaceae   | <i>Carex</i>         | <i>Carex hitchcockiana</i>     | FJ597291 |
| Monocotyledons | Cyperaceae   | <i>Carex</i>         | <i>Carex hitchcockiana</i>     | FJ597292 |
| Monocotyledons | Cyperaceae   | <i>Carex</i>         | <i>Carex hitchcockiana</i>     | FJ597293 |
| Monocotyledons | Cyperaceae   | <i>Carex</i>         | <i>Carex hitchcockiana</i>     | FJ597294 |
| Monocotyledons | Cyperaceae   | <i>Carex</i>         | <i>Carex oligocarpa</i>        | FJ597295 |
| Monocotyledons | Cyperaceae   | <i>Carex</i>         | <i>Carex oligocarpa</i>        | FJ597296 |
| Monocotyledons | Cyperaceae   | <i>Carex</i>         | <i>Carex oligocarpa</i>        | DQ006177 |
| Monocotyledons | Poaceae      | <i>Paspalum</i>      | <i>Paspalum dasypleurum</i>    | AY769128 |
| Monocotyledons | Poaceae      | <i>Paspalum</i>      | <i>Paspalum dasypleurum</i>    | DQ104301 |
| Monocotyledons | Poaceae      | <i>Paspalum</i>      | <i>Paspalum dilatatum</i>      | AY769130 |
| Monocotyledons | Poaceae      | <i>Paspalum</i>      | <i>Paspalum dilatatum</i>      | DQ104295 |
| Monocotyledons | Poaceae      | <i>Paspalum</i>      | <i>Paspalum dilatatum</i>      | DQ104296 |
| Monocotyledons | Poaceae      | <i>Paspalum</i>      | <i>Paspalum dilatatum</i>      | DQ104297 |
| Monocotyledons | Poaceae      | <i>Paspalum</i>      | <i>Paspalum dilatatum</i>      | DQ104298 |
| Monocotyledons | Poaceae      | <i>Paspalum</i>      | <i>Paspalum dilatatum</i>      | DQ104299 |
| Monocotyledons | Poaceae      | <i>Paspalum</i>      | <i>Paspalum pauciciliatum</i>  | AY769144 |
| Monocotyledons | Poaceae      | <i>Paspalum</i>      | <i>Paspalum pauciciliatum</i>  | DQ104302 |
| Monocotyledons | Poaceae      | <i>Paspalum</i>      | <i>Paspalum urvillei</i>       | AY769148 |
| Monocotyledons | Poaceae      | <i>Paspalum</i>      | <i>Paspalum urvillei</i>       | DQ104300 |
| Monocotyledons | Bromeliaceae | <i>Aechmea</i>       | <i>Aechmea racinae</i>         | EF110659 |
| Monocotyledons | Bromeliaceae | <i>Aechmea</i>       | <i>Aechmea racinae</i>         | HQ913655 |
| Monocotyledons | Cyperaceae   | <i>Carex</i>         | <i>Carex amphibola</i>         | FJ597264 |
| Monocotyledons | Cyperaceae   | <i>Carex</i>         | <i>Carex amphibola</i>         | FJ597265 |
| Monocotyledons | Cyperaceae   | <i>Carex</i>         | <i>Carex amphibola</i>         | FJ597266 |
| Monocotyledons | Cyperaceae   | <i>Carex</i>         | <i>Carex amphibola</i>         | DQ006175 |
| Monocotyledons | Poaceae      | <i>Calamagrostis</i> | <i>Calamagrostis muiriana</i>  | DQ113917 |
| Monocotyledons | Poaceae      | <i>Calamagrostis</i> | <i>Calamagrostis muiriana</i>  | DQ113918 |
| Monocotyledons | Poaceae      | <i>Calamagrostis</i> | <i>Calamagrostis muiriana</i>  | DQ113919 |
| Monocotyledons | Poaceae      | <i>Calamagrostis</i> | <i>Calamagrostis muiriana</i>  | DQ113920 |
| Monocotyledons | Poaceae      | <i>Calamagrostis</i> | <i>Calamagrostis muiriana</i>  | DQ113921 |
| Monocotyledons | Poaceae      | <i>Calamagrostis</i> | <i>Calamagrostis breweri</i>   | DQ113922 |
| Monocotyledons | Poaceae      | <i>Calamagrostis</i> | <i>Calamagrostis breweri</i>   | DQ113923 |
| Monocotyledons | Poaceae      | <i>Calamagrostis</i> | <i>Calamagrostis breweri</i>   | DQ113924 |
| Monocotyledons | Poaceae      | <i>Calamagrostis</i> | <i>Calamagrostis breweri</i>   | DQ113925 |
| Monocotyledons | Poaceae      | <i>Agrostis</i>      | <i>Agrostis gigantea</i>       | FJ395454 |
| Monocotyledons | Poaceae      | <i>Agrostis</i>      | <i>Agrostis gigantea</i>       | HQ596584 |
| Monocotyledons | Poaceae      | <i>Agrostis</i>      | <i>Agrostis gigantea</i>       | HQ596585 |
| Monocotyledons | Orchidaceae  | <i>Fernandezia</i>   | <i>Fernandezia tica</i>        | FJ564340 |
| Monocotyledons | Orchidaceae  | <i>Fernandezia</i>   | <i>Fernandezia tica</i>        | FJ564442 |
| Monocotyledons | Poaceae      | <i>Stipa</i>         | <i>Stipa papposa</i>           | EU489274 |

|                |              |                         |                                      |          |
|----------------|--------------|-------------------------|--------------------------------------|----------|
| Monocotyledons | Poaceae      | <i>Stipa</i>            | <i>Stipa papposa</i>                 | EU204706 |
| Monocotyledons | Poaceae      | <i>Stipa</i>            | <i>Stipa papposa</i>                 | EU204707 |
| Monocotyledons | Poaceae      | <i>Stipa</i>            | <i>Stipa papposa</i>                 | EU204708 |
| Monocotyledons | Poaceae      | <i>Stipa</i>            | <i>Stipa papposa</i>                 | EU204709 |
| Monocotyledons | Poaceae      | <i>Stipa</i>            | <i>Stipa papposa</i>                 | EU204710 |
| Monocotyledons | Poaceae      | <i>Elymus</i>           | <i>Elymus nutans</i>                 | HQ221835 |
| Monocotyledons | Poaceae      | <i>Elymus</i>           | <i>Elymus nutans</i>                 | HQ221845 |
| Monocotyledons | Poaceae      | <i>Elymus</i>           | <i>Elymus nutans</i>                 | HQ221847 |
| Monocotyledons | Asparagaceae | <i>Maianthemum</i>      | <i>Maianthemum canadense</i>         | HQ596762 |
| Monocotyledons | Asparagaceae | <i>Maianthemum</i>      | <i>Maianthemum canadense</i>         | EU850236 |
| Monocotyledons | Orchidaceae  | <i>Cuitlauzina</i>      | <i>Cuitlauzina candida</i>           | FJ564070 |
| Monocotyledons | Orchidaceae  | <i>Cuitlauzina</i>      | <i>Cuitlauzina candida</i>           | FJ564670 |
| Monocotyledons | Orchidaceae  | <i>Comparettia</i>      | <i>Comparettia bennettii</i>         | FJ564115 |
| Monocotyledons | Orchidaceae  | <i>Comparettia</i>      | <i>Comparettia bennettii</i>         | FJ564365 |
| Monocotyledons | Orchidaceae  | <i>Tsiorchis</i>        | <i>Tsiorchis kimballiana</i>         | HQ404447 |
| Monocotyledons | Orchidaceae  | <i>Tsiorchis</i>        | <i>Tsiorchis kimballiana</i>         | HQ404448 |
| Monocotyledons | Orchidaceae  | <i>Tsiorchis</i>        | <i>Tsiorchis kimballiana</i>         | HQ404449 |
| Monocotyledons | Orchidaceae  | <i>Tsiorchis</i>        | <i>Tsiorchis kimballiana</i>         | HQ404450 |
| Monocotyledons | Orchidaceae  | <i>Tsiorchis</i>        | <i>Tsiorchis kimballiana</i>         | HQ404451 |
| Monocotyledons | Orchidaceae  | <i>Tsiorchis</i>        | <i>Tsiorchis kimballiana</i>         | HQ404452 |
| Monocotyledons | Bromeliaceae | <i>Aechmea</i>          | <i>Aechmea lingulata</i>             | EF110667 |
| Monocotyledons | Bromeliaceae | <i>Aechmea</i>          | <i>Aechmea lingulata</i>             | JN204616 |
| Monocotyledons | Bromeliaceae | <i>Aechmea</i>          | <i>Aechmea lingulata</i>             | JN204617 |
| Monocotyledons | Bromeliaceae | <i>Aechmea</i>          | <i>Aechmea lingulata</i>             | HQ913652 |
| Monocotyledons | Poaceae      | <i>Calamagrostis</i>    | <i>Calamagrostis erectifolia</i>     | GQ248257 |
| Monocotyledons | Poaceae      | <i>Calamagrostis</i>    | <i>Calamagrostis erectifolia</i>     | EF590676 |
| Monocotyledons | Arecaceae    | <i>Sabal</i>            | <i>Sabal etonia</i>                  | GQ248387 |
| Monocotyledons | Arecaceae    | <i>Sabal</i>            | <i>Sabal etonia</i>                  | EF688515 |
| Monocotyledons | Orchidaceae  | <i>Paraholcoglossum</i> | <i>Paraholcoglossum subulifolium</i> | HQ404477 |
| Monocotyledons | Orchidaceae  | <i>Paraholcoglossum</i> | <i>Paraholcoglossum subulifolium</i> | HQ404478 |
| Monocotyledons | Orchidaceae  | <i>Paraholcoglossum</i> | <i>Paraholcoglossum subulifolium</i> | HQ404479 |
| Monocotyledons | Orchidaceae  | <i>Rhyncholepis</i>     | <i>Rhyncholepis cordata</i>          | GQ248386 |
| Monocotyledons | Orchidaceae  | <i>Rhyncholepis</i>     | <i>Rhyncholepis cordata</i>          | FJ564158 |
| Monocotyledons | Orchidaceae  | <i>Rhyncholepis</i>     | <i>Rhyncholepis cordata</i>          | FJ564666 |
| Monocotyledons | Arecaceae    | <i>Hyphaene</i>         | <i>Hyphaene petersiana</i>           | EU213779 |
| Monocotyledons | Arecaceae    | <i>Hyphaene</i>         | <i>Hyphaene petersiana</i>           | EU213780 |
| Monocotyledons | Orchidaceae  | <i>Prosthechea</i>      | <i>Prosthechea radiata</i>           | EU213761 |
| Monocotyledons | Orchidaceae  | <i>Prosthechea</i>      | <i>Prosthechea radiata</i>           | EU213762 |
| Monocotyledons | Orchidaceae  | <i>Prosthechea</i>      | <i>Prosthechea radiata</i>           | EU213763 |
| Monocotyledons | Orchidaceae  | <i>Trichopilia</i>      | <i>Trichopilia tortilis</i>          | EU213769 |
| Monocotyledons | Orchidaceae  | <i>Trichopilia</i>      | <i>Trichopilia tortilis</i>          | EU213770 |
| Monocotyledons | Orchidaceae  | <i>Trichopilia</i>      | <i>Trichopilia tortilis</i>          | EU213771 |
| Monocotyledons | Orchidaceae  | <i>Trichopilia</i>      | <i>Trichopilia turialbae</i>         | EU213772 |
| Monocotyledons | Orchidaceae  | <i>Trichopilia</i>      | <i>Trichopilia turialbae</i>         | EU213773 |
| Monocotyledons | Orchidaceae  | <i>Trichopilia</i>      | <i>Trichopilia turialbae</i>         | EU213774 |
| Monocotyledons | Orchidaceae  | <i>Trichopilia</i>      | <i>Trichopilia turialbae</i>         | FJ564132 |
| Monocotyledons | Orchidaceae  | <i>Trichopilia</i>      | <i>Trichopilia turialbae</i>         | FJ564632 |
| Monocotyledons | Poaceae      | <i>Gigantochloa</i>     | <i>Gigantochloa scortechinii</i>     | GU063129 |
| Monocotyledons | Poaceae      | <i>Gigantochloa</i>     | <i>Gigantochloa scortechinii</i>     | HQ697908 |
| Monocotyledons | Poaceae      | <i>Gigantochloa</i>     | <i>Gigantochloa scortechinii</i>     | HQ697909 |
| Monocotyledons | Poaceae      | <i>Gigantochloa</i>     | <i>Gigantochloa scortechinii</i>     | HQ697910 |
| Monocotyledons | Poaceae      | <i>Gigantochloa</i>     | <i>Gigantochloa scortechinii</i>     | HQ697911 |
| Monocotyledons | Poaceae      | <i>Gigantochloa</i>     | <i>Gigantochloa scortechinii</i>     | HQ697912 |

|                |              |                         |                                   |          |
|----------------|--------------|-------------------------|-----------------------------------|----------|
| Monocotyledons | Orchidaceae  | <i>Paraholcoglossum</i> | <i>Paraholcoglossum amesianum</i> | HQ404436 |
| Monocotyledons | Orchidaceae  | <i>Paraholcoglossum</i> | <i>Paraholcoglossum amesianum</i> | HQ404437 |
| Monocotyledons | Orchidaceae  | <i>Paraholcoglossum</i> | <i>Paraholcoglossum amesianum</i> | HQ404438 |
| Monocotyledons | Orchidaceae  | <i>Paraholcoglossum</i> | <i>Paraholcoglossum amesianum</i> | HQ404439 |
| Monocotyledons | Orchidaceae  | <i>Paraholcoglossum</i> | <i>Paraholcoglossum amesianum</i> | HQ404440 |
| Monocotyledons | Orchidaceae  | <i>Paraholcoglossum</i> | <i>Paraholcoglossum amesianum</i> | HQ404441 |
| Monocotyledons | Orchidaceae  | <i>Tsiorchis</i>        | <i>Tsiorchis wangii</i>           | HQ404480 |
| Monocotyledons | Orchidaceae  | <i>Tsiorchis</i>        | <i>Tsiorchis wangii</i>           | HQ404481 |
| Monocotyledons | Orchidaceae  | <i>Tsiorchis</i>        | <i>Tsiorchis wangii</i>           | HQ404482 |
| Monocotyledons | Asparagaceae | <i>Maianthemum</i>      | <i>Maianthemum dahuricum</i>      | EU850233 |
| Monocotyledons | Asparagaceae | <i>Maianthemum</i>      | <i>Maianthemum dahuricum</i>      | JN045444 |
| Monocotyledons | Asparagaceae | <i>Maianthemum</i>      | <i>Maianthemum gigas</i>          | EU850241 |
| Monocotyledons | Asparagaceae | <i>Maianthemum</i>      | <i>Maianthemum gigas</i>          | JN045445 |
| Monocotyledons | Asparagaceae | <i>Maianthemum</i>      | <i>Maianthemum gongshanense</i>   | EU850214 |
| Monocotyledons | Asparagaceae | <i>Maianthemum</i>      | <i>Maianthemum gongshanense</i>   | JN045446 |
| Monocotyledons | Asparagaceae | <i>Maianthemum</i>      | <i>Maianthemum henryi</i>         | EU850213 |
| Monocotyledons | Asparagaceae | <i>Maianthemum</i>      | <i>Maianthemum henryi</i>         | EU850217 |
| Monocotyledons | Asparagaceae | <i>Maianthemum</i>      | <i>Maianthemum henryi</i>         | EU850224 |
| Monocotyledons | Asparagaceae | <i>Maianthemum</i>      | <i>Maianthemum henryi</i>         | JN045447 |
| Monocotyledons | Asparagaceae | <i>Maianthemum</i>      | <i>Maianthemum henryi</i>         | JN045448 |
| Monocotyledons | Asparagaceae | <i>Maianthemum</i>      | <i>Maianthemum henryi</i>         | JN045449 |
| Monocotyledons | Asparagaceae | <i>Maianthemum</i>      | <i>Maianthemum henryi</i>         | JN045450 |
| Monocotyledons | Asparagaceae | <i>Maianthemum</i>      | <i>Maianthemum henryi</i>         | JN045451 |
| Monocotyledons | Asparagaceae | <i>Maianthemum</i>      | <i>Maianthemum henryi</i>         | JN045452 |
| Monocotyledons | Asparagaceae | <i>Maianthemum</i>      | <i>Maianthemum henryi</i>         | JN045453 |
| Monocotyledons | Poaceae      | <i>Dendrocalamus</i>    | <i>Dendrocalamus pendulus</i>     | HQ697902 |
| Monocotyledons | Poaceae      | <i>Dendrocalamus</i>    | <i>Dendrocalamus pendulus</i>     | HQ697903 |
| Monocotyledons | Poaceae      | <i>Dendrocalamus</i>    | <i>Dendrocalamus pendulus</i>     | HQ697904 |
| Monocotyledons | Poaceae      | <i>Gigantochloa</i>     | <i>Gigantochloa balui</i>         | GU391008 |
| Monocotyledons | Poaceae      | <i>Gigantochloa</i>     | <i>Gigantochloa balui</i>         | GU063125 |
| Monocotyledons | Orchidaceae  | <i>Gomesa</i>           | <i>Gomesa colorata</i>            | FJ564107 |
| Monocotyledons | Orchidaceae  | <i>Gomesa</i>           | <i>Gomesa colorata</i>            | EU935667 |
| Monocotyledons | Orchidaceae  | <i>Gomesa</i>           | <i>Gomesa cornigera</i>           | FJ564387 |
| Monocotyledons | Orchidaceae  | <i>Gomesa</i>           | <i>Gomesa cornigera</i>           | EU935680 |
| Monocotyledons | Orchidaceae  | <i>Gomesa</i>           | <i>Gomesa echinata</i>            | FJ564383 |
| Monocotyledons | Orchidaceae  | <i>Gomesa</i>           | <i>Gomesa echinata</i>            | EU935677 |
| Monocotyledons | Orchidaceae  | <i>Gomesa</i>           | <i>Gomesa kautskyi</i>            | FJ564400 |
| Monocotyledons | Orchidaceae  | <i>Gomesa</i>           | <i>Gomesa kautskyi</i>            | EU935686 |
| Monocotyledons | Orchidaceae  | <i>Gomesa</i>           | <i>Gomesa lietzei</i>             | FJ564638 |
| Monocotyledons | Orchidaceae  | <i>Gomesa</i>           | <i>Gomesa lietzei</i>             | EU935689 |
| Monocotyledons | Orchidaceae  | <i>Gomesa</i>           | <i>Gomesa pubes</i>               | FJ563995 |
| Monocotyledons | Orchidaceae  | <i>Gomesa</i>           | <i>Gomesa pubes</i>               | EU935681 |
| Monocotyledons | Orchidaceae  | <i>Tolumnia</i>         | <i>Tolumnia pulchella</i>         | FJ564265 |
| Monocotyledons | Orchidaceae  | <i>Tolumnia</i>         | <i>Tolumnia pulchella</i>         | EU935692 |
| Monocotyledons | Orchidaceae  | <i>Gomesa</i>           | <i>Gomesa sarcodes</i>            | FJ564399 |
| Monocotyledons | Orchidaceae  | <i>Gomesa</i>           | <i>Gomesa sarcodes</i>            | EU935682 |
| Monocotyledons | Orchidaceae  | <i>Gomesa</i>           | <i>Gomesa silvana</i>             | FJ564672 |
| Monocotyledons | Orchidaceae  | <i>Gomesa</i>           | <i>Gomesa silvana</i>             | EU935676 |
| Monocotyledons | Orchidaceae  | <i>Gomesa</i>           | <i>Gomesa truncata</i>            | FJ564384 |
| Monocotyledons | Orchidaceae  | <i>Gomesa</i>           | <i>Gomesa truncata</i>            | EU935691 |
| Monocotyledons | Orchidaceae  | <i>Gomesa</i>           | <i>Gomesa venusta</i>             | FJ564310 |
| Monocotyledons | Orchidaceae  | <i>Gomesa</i>           | <i>Gomesa venusta</i>             | EU935668 |
| Monocotyledons | Orchidaceae  | <i>Gomesa</i>           | <i>Gomesa widgrenii</i>           | FJ564671 |

|                |             |                        |                                    |          |
|----------------|-------------|------------------------|------------------------------------|----------|
| Monocotyledons | Orchidaceae | <i>Gomesa</i>          | <i>Gomesa widgrenii</i>            | EU935679 |
| Monocotyledons | Orchidaceae | <i>Gomesa</i>          | <i>Gomesa barbata</i>              | FJ564410 |
| Monocotyledons | Orchidaceae | <i>Gomesa</i>          | <i>Gomesa barbata</i>              | EU935662 |
| Monocotyledons | Orchidaceae | <i>Gomesa</i>          | <i>Gomesa concolor</i>             | FJ564261 |
| Monocotyledons | Orchidaceae | <i>Gomesa</i>          | <i>Gomesa concolor</i>             | FJ564663 |
| Monocotyledons | Orchidaceae | <i>Gomesa</i>          | <i>Gomesa concolor</i>             | EU935664 |
| Monocotyledons | Orchidaceae | <i>Gomesa</i>          | <i>Gomesa hydrophila</i>           | FJ564396 |
| Monocotyledons | Orchidaceae | <i>Gomesa</i>          | <i>Gomesa hydrophila</i>           | EU935665 |
| Monocotyledons | Orchidaceae | <i>Erycina</i>         | <i>Erycina glossomystax</i>        | FJ564592 |
| Monocotyledons | Orchidaceae | <i>Erycina</i>         | <i>Erycina glossomystax</i>        | FJ564593 |
| Monocotyledons | Orchidaceae | <i>Erycina</i>         | <i>Erycina glossomystax</i>        | FJ564595 |
| Monocotyledons | Orchidaceae | <i>Lockhartia</i>      | <i>Lockhartia bennettii</i>        | FJ563975 |
| Monocotyledons | Orchidaceae | <i>Lockhartia</i>      | <i>Lockhartia bennettii</i>        | FJ564528 |
| Monocotyledons | Orchidaceae | <i>Odontoglossum</i>   | <i>Odontoglossum sanguineum</i>    | FJ564028 |
| Monocotyledons | Orchidaceae | <i>Odontoglossum</i>   | <i>Odontoglossum sanguineum</i>    | FJ564501 |
| Monocotyledons | Orchidaceae | <i>Ornithocephalus</i> | <i>Ornithocephalus bicornis</i>    | FJ564567 |
| Monocotyledons | Orchidaceae | <i>Ornithocephalus</i> | <i>Ornithocephalus bicornis</i>    | FJ564647 |
| Monocotyledons | Orchidaceae | <i>Ornithocephalus</i> | <i>Ornithocephalus suarezii</i>    | FJ564563 |
| Monocotyledons | Orchidaceae | <i>Ornithocephalus</i> | <i>Ornithocephalus suarezii</i>    | FJ564566 |
| Monocotyledons | Orchidaceae | <i>Trichocentrum</i>   | <i>Trichocentrum lindenii</i>      | FJ564304 |
| Monocotyledons | Orchidaceae | <i>Trichocentrum</i>   | <i>Trichocentrum lindenii</i>      | FJ564545 |
| Monocotyledons | Orchidaceae | <i>Trichocentrum</i>   | <i>Trichocentrum stipitatum</i>    | FJ564126 |
| Monocotyledons | Orchidaceae | <i>Trichocentrum</i>   | <i>Trichocentrum stipitatum</i>    | FJ564659 |
| Monocotyledons | Orchidaceae | <i>Gomesa</i>          | <i>Gomesa warmingii</i>            | FJ564089 |
| Monocotyledons | Orchidaceae | <i>Gomesa</i>          | <i>Gomesa warmingii</i>            | FJ564391 |
| Monocotyledons | Orchidaceae | <i>Gomesa</i>          | <i>Gomesa warmingii</i>            | FJ564409 |
| Monocotyledons | Orchidaceae | <i>Cischweinfia</i>    | <i>Cischweinfia popowiana</i>      | FJ564312 |
| Monocotyledons | Orchidaceae | <i>Cischweinfia</i>    | <i>Cischweinfia popowiana</i>      | FJ564679 |
| Monocotyledons | Orchidaceae | <i>Cischweinfia</i>    | <i>Cischweinfia pusilla</i>        | FJ564122 |
| Monocotyledons | Orchidaceae | <i>Cischweinfia</i>    | <i>Cischweinfia pusilla</i>        | FJ564651 |
| Monocotyledons | Orchidaceae | <i>Cuitlauzina</i>     | <i>Cuitlauzina pulchella</i>       | FJ564003 |
| Monocotyledons | Orchidaceae | <i>Cuitlauzina</i>     | <i>Cuitlauzina pulchella</i>       | FJ564174 |
| Monocotyledons | Orchidaceae | <i>Cyrtochilum</i>     | <i>Cyrtochilum hoeijeri</i>        | FJ564313 |
| Monocotyledons | Orchidaceae | <i>Cyrtochilum</i>     | <i>Cyrtochilum hoeijeri</i>        | FJ564443 |
| Monocotyledons | Orchidaceae | <i>Cyrtochilum</i>     | <i>Cyrtochilum trifurcatum</i>     | FJ564110 |
| Monocotyledons | Orchidaceae | <i>Cyrtochilum</i>     | <i>Cyrtochilum trifurcatum</i>     | FJ564504 |
| Monocotyledons | Orchidaceae | <i>Ornithocephalus</i> | <i>Ornithocephalus dalstroemii</i> | FJ563990 |
| Monocotyledons | Orchidaceae | <i>Ornithocephalus</i> | <i>Ornithocephalus dalstroemii</i> | FJ564601 |
| Monocotyledons | Orchidaceae | <i>Ornithocephalus</i> | <i>Ornithocephalus dalstroemii</i> | FJ564613 |
| Monocotyledons | Orchidaceae | <i>Tolumnia</i>        | <i>Tolumnia guianensis</i>         | FJ564218 |
| Monocotyledons | Orchidaceae | <i>Tolumnia</i>        | <i>Tolumnia guianensis</i>         | FJ564233 |
| Monocotyledons | Orchidaceae | <i>Tolumnia</i>        | <i>Tolumnia prionoehila</i>        | FJ564219 |
| Monocotyledons | Orchidaceae | <i>Tolumnia</i>        | <i>Tolumnia prionoehila</i>        | FJ564252 |
| Monocotyledons | Orchidaceae | <i>Comparettia</i>     | <i>Comparettia corydaloides</i>    | FJ564280 |
| Monocotyledons | Orchidaceae | <i>Comparettia</i>     | <i>Comparettia corydaloides</i>    | FJ564360 |
| Monocotyledons | Orchidaceae | <i>Comparettia</i>     | <i>Comparettia tungurahuae</i>     | FJ564523 |
| Monocotyledons | Orchidaceae | <i>Comparettia</i>     | <i>Comparettia tungurahuae</i>     | FJ564611 |
| Monocotyledons | Orchidaceae | <i>Gomesa</i>          | <i>Gomesa forbesii</i>             | FJ564408 |
| Monocotyledons | Orchidaceae | <i>Gomesa</i>          | <i>Gomesa forbesii</i>             | FJ564681 |
| Monocotyledons | Orchidaceae | <i>Gomesa</i>          | <i>Gomesa gardneri</i>             | FJ564684 |
| Monocotyledons | Orchidaceae | <i>Gomesa</i>          | <i>Gomesa gardneri</i>             | EU935666 |
| Monocotyledons | Orchidaceae | <i>Gomesa</i>          | <i>Gomesa longipes</i>             | FJ564358 |
| Monocotyledons | Orchidaceae | <i>Gomesa</i>          | <i>Gomesa longipes</i>             | FJ564394 |

|                |              |                      |                                   |          |
|----------------|--------------|----------------------|-----------------------------------|----------|
| Monocotyledons | Orchidaceae  | <i>Gomesa</i>        | <i>Gomesa varicosa</i>            | FJ564411 |
| Monocotyledons | Orchidaceae  | <i>Gomesa</i>        | <i>Gomesa varicosa</i>            | FJ564682 |
| Monocotyledons | Orchidaceae  | <i>Trichocentrum</i> | <i>Trichocentrum cosymbeporum</i> | FJ564301 |
| Monocotyledons | Orchidaceae  | <i>Trichocentrum</i> | <i>Trichocentrum cosymbeporum</i> | FJ564473 |
| Monocotyledons | Bromeliaceae | <i>Tillandsia</i>    | <i>Tillandsia bulbosa</i>         | JN204663 |
| Monocotyledons | Bromeliaceae | <i>Tillandsia</i>    | <i>Tillandsia bulbosa</i>         | JN204664 |
| Monocotyledons | Orchidaceae  | <i>Cymbidium</i>     | <i>Cymbidium haematodes</i>       | HM008996 |
| Monocotyledons | Orchidaceae  | <i>Cymbidium</i>     | <i>Cymbidium haematodes</i>       | JN412741 |
| Monocotyledons | Cyperaceae   | <i>Carex</i>         | <i>Carex acidicola</i>            | FJ597262 |
| Monocotyledons | Cyperaceae   | <i>Carex</i>         | <i>Carex acidicola</i>            | FJ597263 |
| Monocotyledons | Cyperaceae   | <i>Carex</i>         | <i>Carex acidicola</i>            | FJ597311 |
| Monocotyledons | Cyperaceae   | <i>Carex</i>         | <i>Carex bulbostylis</i>          | FJ597268 |
| Monocotyledons | Cyperaceae   | <i>Carex</i>         | <i>Carex bulbostylis</i>          | FJ597269 |
| Monocotyledons | Cyperaceae   | <i>Carex</i>         | <i>Carex calcifugens</i>          | FJ597270 |
| Monocotyledons | Cyperaceae   | <i>Carex</i>         | <i>Carex calcifugens</i>          | FJ597271 |
| Monocotyledons | Cyperaceae   | <i>Carex</i>         | <i>Carex conoidea</i>             | FJ597272 |
| Monocotyledons | Cyperaceae   | <i>Carex</i>         | <i>Carex conoidea</i>             | FJ597273 |
| Monocotyledons | Cyperaceae   | <i>Carex</i>         | <i>Carex corrugata</i>            | FJ597274 |
| Monocotyledons | Cyperaceae   | <i>Carex</i>         | <i>Carex corrugata</i>            | FJ597275 |
| Monocotyledons | Cyperaceae   | <i>Carex</i>         | <i>Carex corrugata</i>            | FJ597276 |
| Monocotyledons | Cyperaceae   | <i>Carex</i>         | <i>Carex corrugata</i>            | FJ597277 |
| Monocotyledons | Cyperaceae   | <i>Carex</i>         | <i>Carex flaccosperma</i>         | FJ597278 |
| Monocotyledons | Cyperaceae   | <i>Carex</i>         | <i>Carex flaccosperma</i>         | FJ597279 |
| Monocotyledons | Cyperaceae   | <i>Carex</i>         | <i>Carex flaccosperma</i>         | FJ597280 |
| Monocotyledons | Cyperaceae   | <i>Carex</i>         | <i>Carex glaucodea</i>            | FJ597281 |
| Monocotyledons | Cyperaceae   | <i>Carex</i>         | <i>Carex glaucodea</i>            | FJ597282 |
| Monocotyledons | Cyperaceae   | <i>Carex</i>         | <i>Carex glaucodea</i>            | FJ597283 |
| Monocotyledons | Cyperaceae   | <i>Carex</i>         | <i>Carex glaucodea</i>            | FJ597284 |
| Monocotyledons | Cyperaceae   | <i>Carex</i>         | <i>Carex glaucodea</i>            | FJ597285 |
| Monocotyledons | Cyperaceae   | <i>Carex</i>         | <i>Carex godfreyi</i>             | FJ597286 |
| Monocotyledons | Cyperaceae   | <i>Carex</i>         | <i>Carex godfreyi</i>             | FJ597287 |
| Monocotyledons | Cyperaceae   | <i>Carex</i>         | <i>Carex grisea</i>               | FJ597288 |
| Monocotyledons | Cyperaceae   | <i>Carex</i>         | <i>Carex grisea</i>               | FJ597289 |
| Monocotyledons | Cyperaceae   | <i>Carex</i>         | <i>Carex grisea</i>               | FJ597290 |
| Monocotyledons | Cyperaceae   | <i>Carex</i>         | <i>Carex ouachitana</i>           | FJ597297 |
| Monocotyledons | Cyperaceae   | <i>Carex</i>         | <i>Carex ouachitana</i>           | FJ597298 |
| Monocotyledons | Cyperaceae   | <i>Carex</i>         | <i>Carex ouachitana</i>           | FJ597299 |
| Monocotyledons | Cyperaceae   | <i>Carex</i>         | <i>Carex paeninsulae</i>          | FJ597300 |
| Monocotyledons | Cyperaceae   | <i>Carex</i>         | <i>Carex paeninsulae</i>          | FJ597301 |
| Monocotyledons | Cyperaceae   | <i>Carex</i>         | <i>Carex paeninsulae</i>          | FJ597302 |
| Monocotyledons | Cyperaceae   | <i>Carex</i>         | <i>Carex pigra</i>                | FJ597303 |
| Monocotyledons | Cyperaceae   | <i>Carex</i>         | <i>Carex pigra</i>                | FJ597304 |
| Monocotyledons | Cyperaceae   | <i>Carex</i>         | <i>Carex planispicata</i>         | FJ597305 |
| Monocotyledons | Cyperaceae   | <i>Carex</i>         | <i>Carex planispicata</i>         | FJ597306 |
| Monocotyledons | Cyperaceae   | <i>Carex</i>         | <i>Carex planispicata</i>         | FJ597307 |
| Monocotyledons | Cyperaceae   | <i>Carex</i>         | <i>Carex thornei</i>              | FJ597308 |
| Monocotyledons | Cyperaceae   | <i>Carex</i>         | <i>Carex thornei</i>              | FJ597309 |
| Monocotyledons | Cyperaceae   | <i>Carex</i>         | <i>Carex thornei</i>              | FJ597310 |
| Monocotyledons | Bromeliaceae | <i>Billbergia</i>    | <i>Billbergia euphemiae</i>       | JN204630 |
| Monocotyledons | Bromeliaceae | <i>Billbergia</i>    | <i>Billbergia euphemiae</i>       | JN204631 |
| Monocotyledons | Bromeliaceae | <i>Billbergia</i>    | <i>Billbergia euphemiae</i>       | JN204632 |
| Monocotyledons | Bromeliaceae | <i>Aechmea</i>       | <i>Aechmea blumenavii</i>         | JN204599 |
| Monocotyledons | Bromeliaceae | <i>Aechmea</i>       | <i>Aechmea blumenavii</i>         | JN204600 |

|                |              |                      |                                      |          |
|----------------|--------------|----------------------|--------------------------------------|----------|
| Monocotyledons | Bromeliaceae | <i>Aechmea</i>       | <i>Aechmea bromeliifolia</i>         | JN204601 |
| Monocotyledons | Bromeliaceae | <i>Aechmea</i>       | <i>Aechmea bromeliifolia</i>         | JN204602 |
| Monocotyledons | Bromeliaceae | <i>Aechmea</i>       | <i>Aechmea bromeliifolia</i>         | JN204603 |
| Monocotyledons | Bromeliaceae | <i>Aechmea</i>       | <i>Aechmea bromeliifolia</i>         | HQ913649 |
| Monocotyledons | Bromeliaceae | <i>Aechmea</i>       | <i>Aechmea coelestis</i>             | JN204608 |
| Monocotyledons | Bromeliaceae | <i>Aechmea</i>       | <i>Aechmea coelestis</i>             | JN204609 |
| Monocotyledons | Bromeliaceae | <i>Aechmea</i>       | <i>Aechmea ramosa</i>                | JN204623 |
| Monocotyledons | Bromeliaceae | <i>Aechmea</i>       | <i>Aechmea ramosa</i>                | JN204624 |
| Monocotyledons | Bromeliaceae | <i>Aechmea</i>       | <i>Aechmea recurvata</i>             | JN204625 |
| Monocotyledons | Bromeliaceae | <i>Aechmea</i>       | <i>Aechmea recurvata</i>             | JN204626 |
| Monocotyledons | Bromeliaceae | <i>Aechmea</i>       | <i>Aechmea recurvata</i>             | JN204627 |
| Monocotyledons | Arecaceae    | <i>Arenga</i>        | <i>Arenga engleri</i>                | JF345020 |
| Monocotyledons | Arecaceae    | <i>Arenga</i>        | <i>Arenga engleri</i>                | JF345021 |
| Monocotyledons | Arecaceae    | <i>Arenga</i>        | <i>Arenga engleri</i>                | JF345022 |
| Monocotyledons | Arecaceae    | <i>Arenga</i>        | <i>Arenga engleri</i>                | JF345023 |
| Monocotyledons | Orchidaceae  | <i>Odontoglossum</i> | <i>Odontoglossum hybrid cultivar</i> | GU136252 |
| Monocotyledons | Orchidaceae  | <i>Odontoglossum</i> | <i>Odontoglossum hybrid cultivar</i> | GU136260 |
| Monocotyledons | Arecaceae    | <i>Arenga</i>        | <i>Arenga westerhoutii</i>           | JF345041 |
| Monocotyledons | Arecaceae    | <i>Arenga</i>        | <i>Arenga westerhoutii</i>           | JF345042 |
| Monocotyledons | Asparagaceae | <i>Polygonatum</i>   | <i>Polygonatum griffithii</i>        | JN046413 |
| Monocotyledons | Asparagaceae | <i>Polygonatum</i>   | <i>Polygonatum griffithii</i>        | JN046414 |
| Monocotyledons | Asparagaceae | <i>Tupistra</i>      | <i>Tupistra grandistigma</i>         | JN047462 |
| Monocotyledons | Asparagaceae | <i>Tupistra</i>      | <i>Tupistra grandistigma</i>         | JN047463 |
| Monocotyledons | Asparagaceae | <i>Tupistra</i>      | <i>Tupistra grandistigma</i>         | JN047464 |
| Monocotyledons | Asparagaceae | <i>Tupistra</i>      | <i>Tupistra grandistigma</i>         | JN047465 |
| Monocotyledons | Asparagaceae | <i>Tupistra</i>      | <i>Tupistra grandistigma</i>         | JN047466 |
| Monocotyledons | Asparagaceae | <i>Tupistra</i>      | <i>Tupistra longispica</i>           | JN047467 |
| Monocotyledons | Asparagaceae | <i>Tupistra</i>      | <i>Tupistra longispica</i>           | JN047468 |
| Monocotyledons | Asparagaceae | <i>Tupistra</i>      | <i>Tupistra longispica</i>           | JN047469 |
| Monocotyledons | Asparagaceae | <i>Tupistra</i>      | <i>Tupistra longispica</i>           | JN047470 |
| Monocotyledons | Asparagaceae | <i>Tupistra</i>      | <i>Tupistra longispica</i>           | JN047471 |
| Monocotyledons | Asparagaceae | <i>Tupistra</i>      | <i>Tupistra pingbianensis</i>        | JN047472 |
| Monocotyledons | Asparagaceae | <i>Tupistra</i>      | <i>Tupistra pingbianensis</i>        | JN047473 |
| Monocotyledons | Asparagaceae | <i>Tupistra</i>      | <i>Tupistra pingbianensis</i>        | JN047474 |
| Monocotyledons | Asparagaceae | <i>Tupistra</i>      | <i>Tupistra pingbianensis</i>        | JN047475 |
| Monocotyledons | Arecaceae    | <i>Arenga</i>        | <i>Arenga hastata</i>                | JF345005 |
| Monocotyledons | Arecaceae    | <i>Arenga</i>        | <i>Arenga hastata</i>                | JF345019 |
| Monocotyledons | Arecaceae    | <i>Arenga</i>        | <i>Arenga hastata</i>                | JF345024 |
| Monocotyledons | Arecaceae    | <i>Arenga</i>        | <i>Arenga obtusifolia</i>            | JF345032 |
| Monocotyledons | Arecaceae    | <i>Arenga</i>        | <i>Arenga obtusifolia</i>            | JF345033 |
| Monocotyledons | Arecaceae    | <i>Arenga</i>        | <i>Arenga ryukyuensis</i>            | JF345036 |
| Monocotyledons | Arecaceae    | <i>Arenga</i>        | <i>Arenga ryukyuensis</i>            | JF345037 |
| Monocotyledons | Arecaceae    | <i>Wallichia</i>     | <i>Wallichia gracilis</i>            | JF345072 |
| Monocotyledons | Arecaceae    | <i>Wallichia</i>     | <i>Wallichia gracilis</i>            | JF345075 |
| Monocotyledons | Arecaceae    | <i>Wallichia</i>     | <i>Wallichia gracilis</i>            | JF345076 |
| Monocotyledons | Bromeliaceae | <i>Aechmea</i>       | <i>Aechmea bicolor</i>               | JN204597 |
| Monocotyledons | Bromeliaceae | <i>Aechmea</i>       | <i>Aechmea bicolor</i>               | JN204598 |
| Monocotyledons | Bromeliaceae | <i>Aechmea</i>       | <i>Aechmea caudata</i>               | JN204605 |
| Monocotyledons | Bromeliaceae | <i>Aechmea</i>       | <i>Aechmea caudata</i>               | JN204606 |
| Monocotyledons | Bromeliaceae | <i>Aechmea</i>       | <i>Aechmea caudata</i>               | JN204607 |
| Monocotyledons | Bromeliaceae | <i>Aechmea</i>       | <i>Aechmea curranii</i>              | JN204610 |
| Monocotyledons | Bromeliaceae | <i>Aechmea</i>       | <i>Aechmea curranii</i>              | JN204611 |
| Monocotyledons | Bromeliaceae | <i>Aechmea</i>       | <i>Aechmea curranii</i>              | JN204612 |

|                |              |                   |                               |          |
|----------------|--------------|-------------------|-------------------------------|----------|
| Monocotyledons | Bromeliaceae | <i>Aechmea</i>    | <i>Aechmea phanerophlebia</i> | JN204620 |
| Monocotyledons | Bromeliaceae | <i>Aechmea</i>    | <i>Aechmea phanerophlebia</i> | JN204621 |
| Monocotyledons | Bromeliaceae | <i>Aechmea</i>    | <i>Aechmea phanerophlebia</i> | JN204622 |
| Monocotyledons | Bromeliaceae | <i>Billbergia</i> | <i>Billbergia distachya</i>   | JN204628 |
| Monocotyledons | Bromeliaceae | <i>Billbergia</i> | <i>Billbergia distachya</i>   | JN204629 |
| Monocotyledons | Bromeliaceae | <i>Billbergia</i> | <i>Billbergia chlorostica</i> | JN204633 |
| Monocotyledons | Bromeliaceae | <i>Billbergia</i> | <i>Billbergia chlorostica</i> | JN204634 |
| Monocotyledons | Bromeliaceae | <i>Billbergia</i> | <i>Billbergia chlorostica</i> | JN204635 |
| Monocotyledons | Bromeliaceae | <i>Tillandsia</i> | <i>Tillandsia polystachia</i> | JN204665 |
| Monocotyledons | Bromeliaceae | <i>Tillandsia</i> | <i>Tillandsia polystachia</i> | JN204666 |
| Monocotyledons | Colchicaceae | <i>Colchicum</i>  | <i>Colchicum bivonae</i>      | JF934074 |
| Monocotyledons | Iridaceae    | <i>Iris</i>       | <i>Iris germanica</i>         | JN044979 |
| Monocotyledons | Iridaceae    | <i>Iris</i>       | <i>Iris germanica</i>         | JN044980 |
| Monocotyledons | Iridaceae    | <i>Iris</i>       | <i>Iris chrysographes</i>     | JN044960 |
| Monocotyledons | Iridaceae    | <i>Iris</i>       | <i>Iris chrysographes</i>     | JN044961 |
| Monocotyledons | Iridaceae    | <i>Iris</i>       | <i>Iris chrysographes</i>     | JN044962 |
| Monocotyledons | Iridaceae    | <i>Iris</i>       | <i>Iris ensata</i>            | JN044975 |
| Monocotyledons | Iridaceae    | <i>Iris</i>       | <i>Iris ensata</i>            | JN044976 |
| Monocotyledons | Iridaceae    | <i>Iris</i>       | <i>Iris domestica</i>         | GQ434907 |
| Monocotyledons | Iridaceae    | <i>Iris</i>       | <i>Iris domestica</i>         | GQ434908 |
| Monocotyledons | Iridaceae    | <i>Iris</i>       | <i>Iris pseudacorus</i>       | JN045000 |
| Monocotyledons | Iridaceae    | <i>Iris</i>       | <i>Iris pseudacorus</i>       | JN045001 |
| Monocotyledons | Iridaceae    | <i>Iris</i>       | <i>Iris pseudacorus</i>       | JN045002 |
| Monocotyledons | Iridaceae    | <i>Iris</i>       | <i>Iris tectorum</i>          | GQ435429 |
| Monocotyledons | Iridaceae    | <i>Iris</i>       | <i>Iris tectorum</i>          | GQ435430 |
| Monocotyledons | Iridaceae    | <i>Iris</i>       | <i>Iris tectorum</i>          | JN045015 |
| Monocotyledons | Iridaceae    | <i>Iris</i>       | <i>Iris tectorum</i>          | JN045016 |
| Monocotyledons | Iridaceae    | <i>Iris</i>       | <i>Iris tectorum</i>          | JN045017 |
| Monocotyledons | Iridaceae    | <i>Iris</i>       | <i>Iris tectorum</i>          | JN045018 |
| Monocotyledons | Iridaceae    | <i>Iris</i>       | <i>Iris tectorum</i>          | JN045019 |
| Monocotyledons | Iridaceae    | <i>Iris</i>       | <i>Iris tectorum</i>          | JN045020 |
| Monocotyledons | Iridaceae    | <i>Iris</i>       | <i>Iris forrestii</i>         | JN044977 |
| Monocotyledons | Iridaceae    | <i>Iris</i>       | <i>Iris forrestii</i>         | JN044978 |
| Monocotyledons | Iridaceae    | <i>Iris</i>       | <i>Iris dichotoma</i>         | JN044973 |
| Monocotyledons | Iridaceae    | <i>Iris</i>       | <i>Iris dichotoma</i>         | JN044974 |
| Monocotyledons | Iridaceae    | <i>Iris</i>       | <i>Iris humilis</i>           | FM253735 |
| Monocotyledons | Iridaceae    | <i>Iris</i>       | <i>Iris humilis</i>           | FM253736 |
| Monocotyledons | Iridaceae    | <i>Iris</i>       | <i>Iris humilis</i>           | FM253737 |
| Monocotyledons | Iridaceae    | <i>Iris</i>       | <i>Iris humilis</i>           | FM253738 |
| Monocotyledons | Iridaceae    | <i>Iris</i>       | <i>Iris humilis</i>           | FM253739 |
| Monocotyledons | Iridaceae    | <i>Iris</i>       | <i>Iris humilis</i>           | FM253740 |
| Monocotyledons | Iridaceae    | <i>Iris</i>       | <i>Iris humilis</i>           | FM253741 |
| Monocotyledons | Iridaceae    | <i>Iris</i>       | <i>Iris humilis</i>           | FM253742 |
| Monocotyledons | Iridaceae    | <i>Iris</i>       | <i>Iris humilis</i>           | FM253743 |
| Monocotyledons | Iridaceae    | <i>Iris</i>       | <i>Iris humilis</i>           | FM253744 |
| Monocotyledons | Iridaceae    | <i>Iris</i>       | <i>Iris humilis</i>           | FM253745 |
| Monocotyledons | Iridaceae    | <i>Iris</i>       | <i>Iris humilis</i>           | FM253746 |
| Monocotyledons | Iridaceae    | <i>Iris</i>       | <i>Iris humilis</i>           | FM253747 |
| Monocotyledons | Iridaceae    | <i>Iris</i>       | <i>Iris lactea</i>            | JN044989 |
| Monocotyledons | Iridaceae    | <i>Iris</i>       | <i>Iris lactea</i>            | JN044990 |
| Monocotyledons | Iridaceae    | <i>Iris</i>       | <i>Iris lactea</i>            | JN044991 |
| Monocotyledons | Iridaceae    | <i>Iris</i>       | <i>Iris lactea</i>            | JN044992 |
| Monocotyledons | Iridaceae    | <i>Iris</i>       | <i>Iris loczyi</i>            | JN044994 |



|                |                  |                  |                               |          |
|----------------|------------------|------------------|-------------------------------|----------|
| Monocotyledons | Iridaceae        | <i>Iris</i>      | <i>Iris loczyi</i>            | JN044995 |
| Monocotyledons | Iridaceae        | <i>Iris</i>      | <i>Iris loczyi</i>            | JN044996 |
| Monocotyledons | Iridaceae        | <i>Iris</i>      | <i>Iris ruthenica</i>         | JN045005 |
| Monocotyledons | Iridaceae        | <i>Iris</i>      | <i>Iris ruthenica</i>         | JN045006 |
| Monocotyledons | Iridaceae        | <i>Iris</i>      | <i>Iris ruthenica</i>         | JN045007 |
| Monocotyledons | Iridaceae        | <i>Iris</i>      | <i>Iris ruthenica</i>         | JN045008 |
| Monocotyledons | Iridaceae        | <i>Iris</i>      | <i>Iris ruthenica</i>         | JN045009 |
| Monocotyledons | Iridaceae        | <i>Iris</i>      | <i>Iris sanguinea</i>         | JN045010 |
| Monocotyledons | Iridaceae        | <i>Iris</i>      | <i>Iris sanguinea</i>         | JN045011 |
| Monocotyledons | Iridaceae        | <i>Iris</i>      | <i>Iris sanguinea</i>         | JN045012 |
| Monocotyledons | Iridaceae        | <i>Iris</i>      | <i>Iris tenuifolia</i>        | JN045021 |
| Monocotyledons | Iridaceae        | <i>Iris</i>      | <i>Iris tenuifolia</i>        | JN045022 |
| Monocotyledons | Iridaceae        | <i>Iris</i>      | <i>Iris tigridia</i>          | JN045023 |
| Monocotyledons | Iridaceae        | <i>Iris</i>      | <i>Iris tigridia</i>          | JN045024 |
| Monocotyledons | Iridaceae        | <i>Iris</i>      | <i>Iris uniflora</i>          | JN045025 |
| Monocotyledons | Iridaceae        | <i>Iris</i>      | <i>Iris uniflora</i>          | JN045026 |
| Monocotyledons | Iridaceae        | <i>Iris</i>      | <i>Iris ventricosa</i>        | JN045028 |
| Monocotyledons | Iridaceae        | <i>Iris</i>      | <i>Iris ventricosa</i>        | JN045029 |
| Monocotyledons | Zingiberaceae    | <i>Amomum</i>    | <i>Amomum glabrum</i>         | JN043930 |
| Monocotyledons | Zingiberaceae    | <i>Amomum</i>    | <i>Amomum glabrum</i>         | JN043931 |
| Monocotyledons | Zingiberaceae    | <i>Amomum</i>    | <i>Amomum longipetiolatum</i> | JN043938 |
| Monocotyledons | Zingiberaceae    | <i>Amomum</i>    | <i>Amomum longipetiolatum</i> | JN043939 |
| Monocotyledons | Zingiberaceae    | <i>Amomum</i>    | <i>Amomum villosum</i>        | GQ118656 |
| Monocotyledons | Zingiberaceae    | <i>Amomum</i>    | <i>Amomum villosum</i>        | GU180423 |
| Monocotyledons | Iridaceae        | <i>Iris</i>      | <i>Iris delavayi</i>          | JN044971 |
| Monocotyledons | Iridaceae        | <i>Iris</i>      | <i>Iris delavayi</i>          | JN044972 |
| Monocotyledons | Iridaceae        | <i>Iris</i>      | <i>Iris missouriensis</i>     | EF434718 |
| Monocotyledons | Iridaceae        | <i>Iris</i>      | <i>Iris missouriensis</i>     | EF434719 |
| Monocotyledons | Iridaceae        | <i>Iris</i>      | <i>Iris missouriensis</i>     | EF434720 |
| Monocotyledons | Iridaceae        | <i>Iris</i>      | <i>Iris missouriensis</i>     | EF434721 |
| Monocotyledons | Iridaceae        | <i>Iris</i>      | <i>Iris missouriensis</i>     | EF434723 |
| Monocotyledons | Iridaceae        | <i>Iris</i>      | <i>Iris missouriensis</i>     | EF434724 |
| Monocotyledons | Xanthorrhoeaceae | <i>Haworthia</i> | <i>Haworthia aristata</i>     | HQ646850 |
| Monocotyledons | Xanthorrhoeaceae | <i>Haworthia</i> | <i>Haworthia aristata</i>     | HQ646851 |
| Monocotyledons | Xanthorrhoeaceae | <i>Haworthia</i> | <i>Haworthia attenuata</i>    | HQ646880 |
| Monocotyledons | Xanthorrhoeaceae | <i>Haworthia</i> | <i>Haworthia attenuata</i>    | HQ646881 |
| Monocotyledons | Xanthorrhoeaceae | <i>Haworthia</i> | <i>Haworthia cymbiformis</i>  | HQ646865 |
| Monocotyledons | Xanthorrhoeaceae | <i>Haworthia</i> | <i>Haworthia cymbiformis</i>  | HQ646866 |
| Monocotyledons | Xanthorrhoeaceae | <i>Haworthia</i> | <i>Haworthia cooperi</i>      | HQ646854 |
| Monocotyledons | Xanthorrhoeaceae | <i>Haworthia</i> | <i>Haworthia cooperi</i>      | HQ646855 |
| Monocotyledons | Xanthorrhoeaceae | <i>Haworthia</i> | <i>Haworthia cooperi</i>      | HQ646856 |
| Monocotyledons | Xanthorrhoeaceae | <i>Haworthia</i> | <i>Haworthia cooperi</i>      | HQ646857 |
| Monocotyledons | Xanthorrhoeaceae | <i>Haworthia</i> | <i>Haworthia cooperi</i>      | HQ646858 |
| Monocotyledons | Xanthorrhoeaceae | <i>Haworthia</i> | <i>Haworthia cooperi</i>      | HQ646859 |
| Monocotyledons | Xanthorrhoeaceae | <i>Haworthia</i> | <i>Haworthia cooperi</i>      | HQ646860 |
| Monocotyledons | Xanthorrhoeaceae | <i>Haworthia</i> | <i>Haworthia cooperi</i>      | HQ646861 |
| Monocotyledons | Xanthorrhoeaceae | <i>Haworthia</i> | <i>Haworthia cooperi</i>      | HQ646862 |
| Monocotyledons | Xanthorrhoeaceae | <i>Haworthia</i> | <i>Haworthia cooperi</i>      | HQ646863 |
| Monocotyledons | Xanthorrhoeaceae | <i>Haworthia</i> | <i>Haworthia cooperi</i>      | HQ646864 |
| Monocotyledons | Xanthorrhoeaceae | <i>Haworthia</i> | <i>Haworthia glauca</i>       | HQ646884 |
| Monocotyledons | Xanthorrhoeaceae | <i>Haworthia</i> | <i>Haworthia glauca</i>       | HQ646885 |
| Monocotyledons | Xanthorrhoeaceae | <i>Haworthia</i> | <i>Haworthia glauca</i>       | HQ646886 |
| Monocotyledons | Zingiberaceae    | <i>Amomum</i>    | <i>Amomum compactum</i>       | GQ118660 |

|                |               |                      |                                |          |
|----------------|---------------|----------------------|--------------------------------|----------|
| Monocotyledons | Zingiberaceae | <i>Amomum</i>        | <i>Amomum compactum</i>        | JN043924 |
| Monocotyledons | Zingiberaceae | <i>Amomum</i>        | <i>Amomum compactum</i>        | JN043925 |
| Monocotyledons | Zingiberaceae | <i>Amomum</i>        | <i>Amomum compactum</i>        | JN043926 |
| Monocotyledons | Zingiberaceae | <i>Amomum</i>        | <i>Amomum koenigii</i>         | JN043932 |
| Monocotyledons | Zingiberaceae | <i>Amomum</i>        | <i>Amomum koenigii</i>         | JN043933 |
| Monocotyledons | Zingiberaceae | <i>Amomum</i>        | <i>Amomum koenigii</i>         | JN043934 |
| Monocotyledons | Zingiberaceae | <i>Amomum</i>        | <i>Amomum koenigii</i>         | JN043935 |
| Monocotyledons | Zingiberaceae | <i>Amomum</i>        | <i>Amomum maximum</i>          | JN043940 |
| Monocotyledons | Zingiberaceae | <i>Amomum</i>        | <i>Amomum maximum</i>          | JN043941 |
| Monocotyledons | Zingiberaceae | <i>Amomum</i>        | <i>Amomum maximum</i>          | JN043942 |
| Monocotyledons | Zingiberaceae | <i>Amomum</i>        | <i>Amomum menglaense</i>       | JN043943 |
| Monocotyledons | Zingiberaceae | <i>Amomum</i>        | <i>Amomum menglaense</i>       | JN043944 |
| Monocotyledons | Zingiberaceae | <i>Amomum</i>        | <i>Amomum menglaense</i>       | JN043945 |
| Monocotyledons | Zingiberaceae | <i>Amomum</i>        | <i>Amomum menglaense</i>       | JN043946 |
| Monocotyledons | Zingiberaceae | <i>Amomum</i>        | <i>Amomum purpleorubrum</i>    | JN043959 |
| Monocotyledons | Zingiberaceae | <i>Amomum</i>        | <i>Amomum purpleorubrum</i>    | JN043960 |
| Monocotyledons | Zingiberaceae | <i>Amomum</i>        | <i>Amomum quadratolaminare</i> | JN043961 |
| Monocotyledons | Zingiberaceae | <i>Amomum</i>        | <i>Amomum quadratolaminare</i> | JN043962 |
| Monocotyledons | Zingiberaceae | <i>Amomum</i>        | <i>Amomum quadratolaminare</i> | JN043963 |
| Monocotyledons | Zingiberaceae | <i>Amomum</i>        | <i>Amomum quadratolaminare</i> | JN043964 |
| Monocotyledons | Zingiberaceae | <i>Amomum</i>        | <i>Amomum quadratolaminare</i> | JN043965 |
| Monocotyledons | Zingiberaceae | <i>Amomum</i>        | <i>Amomum sericeum</i>         | JN043972 |
| Monocotyledons | Zingiberaceae | <i>Amomum</i>        | <i>Amomum sericeum</i>         | JN043973 |
| Monocotyledons | Zingiberaceae | <i>Amomum</i>        | <i>Amomum subcapitatum</i>     | JN043974 |
| Monocotyledons | Zingiberaceae | <i>Amomum</i>        | <i>Amomum subcapitatum</i>     | JN043975 |
| Monocotyledons | Orchidaceae   | <i>Rhynchostylis</i> | <i>Rhynchostylis retusa</i>    | GQ251332 |
| Monocotyledons | Orchidaceae   | <i>Rhynchostylis</i> | <i>Rhynchostylis retusa</i>    | GQ251333 |
| Monocotyledons | Orchidaceae   | <i>Rhynchostylis</i> | <i>Rhynchostylis retusa</i>    | GQ251334 |
| Monocotyledons | Orchidaceae   | <i>Rhynchostylis</i> | <i>Rhynchostylis gigantea</i>  | GQ251323 |
| Monocotyledons | Orchidaceae   | <i>Rhynchostylis</i> | <i>Rhynchostylis gigantea</i>  | GQ251324 |
| Monocotyledons | Orchidaceae   | <i>Rhynchostylis</i> | <i>Rhynchostylis gigantea</i>  | GQ251325 |
| Monocotyledons | Orchidaceae   | <i>Rhynchostylis</i> | <i>Rhynchostylis gigantea</i>  | GQ251326 |
| Monocotyledons | Orchidaceae   | <i>Rhynchostylis</i> | <i>Rhynchostylis gigantea</i>  | GQ251327 |
| Monocotyledons | Orchidaceae   | <i>Rhynchostylis</i> | <i>Rhynchostylis gigantea</i>  | GQ251328 |
| Monocotyledons | Orchidaceae   | <i>Rhynchostylis</i> | <i>Rhynchostylis gigantea</i>  | GQ251329 |
| Monocotyledons | Orchidaceae   | <i>Rhynchostylis</i> | <i>Rhynchostylis gigantea</i>  | GQ251330 |
| Monocotyledons | Orchidaceae   | <i>Rhynchostylis</i> | <i>Rhynchostylis gigantea</i>  | GQ251331 |
| Monocotyledons | Iridaceae     | <i>Iris</i>          | <i>Iris collettii</i>          | JN044963 |
| Monocotyledons | Iridaceae     | <i>Iris</i>          | <i>Iris collettii</i>          | JN044964 |
| Monocotyledons | Iridaceae     | <i>Iris</i>          | <i>Iris collettii</i>          | JN044965 |
| Monocotyledons | Zingiberaceae | <i>Amomum</i>        | <i>Amomum petaloideum</i>      | JN043955 |
| Monocotyledons | Zingiberaceae | <i>Amomum</i>        | <i>Amomum petaloideum</i>      | JN043956 |
| Monocotyledons | Zingiberaceae | <i>Amomum</i>        | <i>Amomum petaloideum</i>      | JN043957 |
| Monocotyledons | Zingiberaceae | <i>Amomum</i>        | <i>Amomum petaloideum</i>      | JN043958 |
| Monocotyledons | Iridaceae     | <i>Iris</i>          | <i>Iris mandshurica</i>        | FM253719 |
| Monocotyledons | Iridaceae     | <i>Iris</i>          | <i>Iris mandshurica</i>        | FM253720 |
| Monocotyledons | Iridaceae     | <i>Iris</i>          | <i>Iris mandshurica</i>        | FM253721 |
| Monocotyledons | Iridaceae     | <i>Iris</i>          | <i>Iris mandshurica</i>        | FM253722 |
| Monocotyledons | Iridaceae     | <i>Iris</i>          | <i>Iris mandshurica</i>        | FM253723 |
| Monocotyledons | Iridaceae     | <i>Iris</i>          | <i>Iris mandshurica</i>        | FM253724 |
| Monocotyledons | Iridaceae     | <i>Iris</i>          | <i>Iris mandshurica</i>        | FM253725 |
| Monocotyledons | Iridaceae     | <i>Iris</i>          | <i>Iris mandshurica</i>        | FM253726 |
| Monocotyledons | Iridaceae     | <i>Iris</i>          | <i>Iris mandshurica</i>        | FM253727 |

|                |             |                     |                                 |          |
|----------------|-------------|---------------------|---------------------------------|----------|
| Monocotyledons | Iridaceae   | <i>Iris</i>         | <i>Iris mandshurica</i>         | FM253728 |
| Monocotyledons | Iridaceae   | <i>Iris</i>         | <i>Iris mandshurica</i>         | FM253729 |
| Monocotyledons | Iridaceae   | <i>Iris</i>         | <i>Iris mandshurica</i>         | FM253730 |
| Monocotyledons | Iridaceae   | <i>Iris</i>         | <i>Iris mandshurica</i>         | FM253731 |
| Monocotyledons | Iridaceae   | <i>Iris</i>         | <i>Iris mandshurica</i>         | FM253732 |
| Monocotyledons | Iridaceae   | <i>Iris</i>         | <i>Iris mandshurica</i>         | FM253733 |
| Monocotyledons | Iridaceae   | <i>Iris</i>         | <i>Iris mandshurica</i>         | FM253734 |
| Monocotyledons | Orchidaceae | <i>Aulosepalum</i>  | <i>Aulosepalum pyramidale</i>   | AM884884 |
| Monocotyledons | Orchidaceae | <i>Aulosepalum</i>  | <i>Aulosepalum pyramidale</i>   | AM884885 |
| Monocotyledons | Orchidaceae | <i>Aulosepalum</i>  | <i>Aulosepalum ramentaceum</i>  | AM884882 |
| Monocotyledons | Orchidaceae | <i>Aulosepalum</i>  | <i>Aulosepalum ramentaceum</i>  | AM884883 |
| Monocotyledons | Orchidaceae | <i>Aulosepalum</i>  | <i>Aulosepalum oestlundii</i>   | AM884886 |
| Monocotyledons | Orchidaceae | <i>Aulosepalum</i>  | <i>Aulosepalum oestlundii</i>   | AM884887 |
| Monocotyledons | Orchidaceae | <i>Aulosepalum</i>  | <i>Aulosepalum hemichreum</i>   | AM884889 |
| Monocotyledons | Orchidaceae | <i>Aulosepalum</i>  | <i>Aulosepalum hemichreum</i>   | AM884890 |
| Monocotyledons | Orchidaceae | <i>Holcoglossum</i> | <i>Holcoglossum flavescens</i>  | HQ404442 |
| Monocotyledons | Orchidaceae | <i>Holcoglossum</i> | <i>Holcoglossum flavescens</i>  | HQ404443 |
| Monocotyledons | Orchidaceae | <i>Holcoglossum</i> | <i>Holcoglossum flavescens</i>  | HQ404444 |
| Monocotyledons | Orchidaceae | <i>Holcoglossum</i> | <i>Holcoglossum flavescens</i>  | HQ404445 |
| Monocotyledons | Orchidaceae | <i>Holcoglossum</i> | <i>Holcoglossum flavescens</i>  | HQ404446 |
| Monocotyledons | Orchidaceae | <i>Holcoglossum</i> | <i>Holcoglossum lingulatum</i>  | HQ404453 |
| Monocotyledons | Orchidaceae | <i>Holcoglossum</i> | <i>Holcoglossum lingulatum</i>  | HQ404454 |
| Monocotyledons | Orchidaceae | <i>Holcoglossum</i> | <i>Holcoglossum lingulatum</i>  | HQ404455 |
| Monocotyledons | Orchidaceae | <i>Holcoglossum</i> | <i>Holcoglossum nujiangense</i> | HQ404456 |
| Monocotyledons | Orchidaceae | <i>Holcoglossum</i> | <i>Holcoglossum nujiangense</i> | HQ404457 |
| Monocotyledons | Orchidaceae | <i>Holcoglossum</i> | <i>Holcoglossum nujiangense</i> | HQ404458 |
| Monocotyledons | Orchidaceae | <i>Holcoglossum</i> | <i>Holcoglossum nujiangense</i> | HQ404459 |
| Monocotyledons | Orchidaceae | <i>Holcoglossum</i> | <i>Holcoglossum nujiangense</i> | HQ404460 |
| Monocotyledons | Orchidaceae | <i>Holcoglossum</i> | <i>Holcoglossum rupestre</i>    | HQ404467 |
| Monocotyledons | Orchidaceae | <i>Holcoglossum</i> | <i>Holcoglossum rupestre</i>    | HQ404468 |
| Monocotyledons | Orchidaceae | <i>Holcoglossum</i> | <i>Holcoglossum rupestre</i>    | HQ404469 |
| Monocotyledons | Orchidaceae | <i>Holcoglossum</i> | <i>Holcoglossum rupestre</i>    | HQ404470 |
| Monocotyledons | Orchidaceae | <i>Holcoglossum</i> | <i>Holcoglossum rupestre</i>    | HQ404471 |
| Monocotyledons | Orchidaceae | <i>Holcoglossum</i> | <i>Holcoglossum sinicum</i>     | HQ404472 |
| Monocotyledons | Orchidaceae | <i>Holcoglossum</i> | <i>Holcoglossum sinicum</i>     | HQ404473 |
| Monocotyledons | Orchidaceae | <i>Holcoglossum</i> | <i>Holcoglossum sinicum</i>     | HQ404474 |
| Monocotyledons | Orchidaceae | <i>Holcoglossum</i> | <i>Holcoglossum sinicum</i>     | HQ404475 |
| Monocotyledons | Orchidaceae | <i>Holcoglossum</i> | <i>Holcoglossum sinicum</i>     | HQ404476 |
| Monocotyledons | Orchidaceae | <i>Holcoglossum</i> | <i>Holcoglossum weixiense</i>   | HQ404483 |
| Monocotyledons | Orchidaceae | <i>Holcoglossum</i> | <i>Holcoglossum weixiense</i>   | HQ404484 |
| Monocotyledons | Orchidaceae | <i>Holcoglossum</i> | <i>Holcoglossum weixiense</i>   | HQ404485 |
| Monocotyledons | Orchidaceae | <i>Holcoglossum</i> | <i>Holcoglossum weixiense</i>   | HQ404486 |
| Monocotyledons | Orchidaceae | <i>Holcoglossum</i> | <i>Holcoglossum weixiense</i>   | HQ404487 |
| Monocotyledons | Iridaceae   | <i>Iris</i>         | <i>Iris vorobievii</i>          | FM253702 |
| Monocotyledons | Iridaceae   | <i>Iris</i>         | <i>Iris vorobievii</i>          | FM253703 |
| Monocotyledons | Iridaceae   | <i>Iris</i>         | <i>Iris vorobievii</i>          | FM253704 |
| Monocotyledons | Iridaceae   | <i>Iris</i>         | <i>Iris vorobievii</i>          | FM253705 |
| Monocotyledons | Iridaceae   | <i>Iris</i>         | <i>Iris vorobievii</i>          | FM253706 |
| Monocotyledons | Iridaceae   | <i>Iris</i>         | <i>Iris vorobievii</i>          | FM253707 |
| Monocotyledons | Iridaceae   | <i>Iris</i>         | <i>Iris vorobievii</i>          | FM253708 |
| Monocotyledons | Iridaceae   | <i>Iris</i>         | <i>Iris vorobievii</i>          | FM253709 |
| Monocotyledons | Iridaceae   | <i>Iris</i>         | <i>Iris vorobievii</i>          | FM253710 |
| Monocotyledons | Iridaceae   | <i>Iris</i>         | <i>Iris vorobievii</i>          | FM253711 |

|                |               |                      |                                     |          |
|----------------|---------------|----------------------|-------------------------------------|----------|
| Monocotyledons | Iridaceae     | <i>Iris</i>          | <i>Iris vorobievii</i>              | FM253712 |
| Monocotyledons | Iridaceae     | <i>Iris</i>          | <i>Iris vorobievii</i>              | FM253713 |
| Monocotyledons | Iridaceae     | <i>Iris</i>          | <i>Iris vorobievii</i>              | FM253714 |
| Monocotyledons | Iridaceae     | <i>Iris</i>          | <i>Iris vorobievii</i>              | FM253715 |
| Monocotyledons | Iridaceae     | <i>Iris</i>          | <i>Iris vorobievii</i>              | FM253716 |
| Monocotyledons | Iridaceae     | <i>Iris</i>          | <i>Iris vorobievii</i>              | FM253717 |
| Monocotyledons | Iridaceae     | <i>Iris</i>          | <i>Iris vorobievii</i>              | FM253718 |
| Monocotyledons | Eriocaulaceae | <i>Paepalanthus</i>  | <i>Paepalanthus lamareckii</i>      | EU924377 |
| Monocotyledons | Eriocaulaceae | <i>Paepalanthus</i>  | <i>Paepalanthus lamareckii</i>      | HQ843070 |
| Monocotyledons | Iridaceae     | <i>Iris</i>          | <i>Iris bulleyana</i>               | JN044956 |
| Monocotyledons | Iridaceae     | <i>Iris</i>          | <i>Iris bulleyana</i>               | JN044957 |
| Monocotyledons | Iridaceae     | <i>Iris</i>          | <i>Iris bulleyana</i>               | JN044958 |
| Monocotyledons | Iridaceae     | <i>Iris</i>          | <i>Iris decora</i>                  | JN044969 |
| Monocotyledons | Iridaceae     | <i>Iris</i>          | <i>Iris decora</i>                  | JN044970 |
| Monocotyledons | Zingiberaceae | <i>Amomum</i>        | <i>Amomum longiligulare</i>         | GQ118658 |
| Monocotyledons | Zingiberaceae | <i>Amomum</i>        | <i>Amomum longiligulare</i>         | GQ464983 |
| Monocotyledons | Zingiberaceae | <i>Amomum</i>        | <i>Amomum longiligulare</i>         | GU180431 |
| Monocotyledons | Zingiberaceae | <i>Amomum</i>        | <i>Amomum krervanh</i>              | GQ118657 |
| Monocotyledons | Zingiberaceae | <i>Amomum</i>        | <i>Amomum krervanh</i>              | JN043936 |
| Monocotyledons | Zingiberaceae | <i>Amomum</i>        | <i>Amomum krervanh</i>              | JN043937 |
| Monocotyledons | Orchidaceae   | <i>Rhynchostylis</i> | <i>Rhynchostylis coelestis</i>      | GQ251335 |
| Monocotyledons | Orchidaceae   | <i>Rhynchostylis</i> | <i>Rhynchostylis coelestis</i>      | GQ251336 |
| Monocotyledons | Orchidaceae   | <i>Rhynchostylis</i> | <i>Rhynchostylis coelestis</i>      | GQ251337 |
| Monocotyledons | Iridaceae     | <i>Iris</i>          | <i>Iris rossii</i>                  | JN045003 |
| Monocotyledons | Iridaceae     | <i>Iris</i>          | <i>Iris rossii</i>                  | JN045004 |
| Monocotyledons | Eriocaulaceae | <i>Paepalanthus</i>  | <i>Paepalanthus sp. MJGA-2011</i>   | HQ843079 |
| Monocotyledons | Eriocaulaceae | <i>Paepalanthus</i>  | <i>Paepalanthus sp. MJGA-2011</i>   | HQ843080 |
| Monocotyledons | Eriocaulaceae | <i>Paepalanthus</i>  | <i>Paepalanthus sp. MJGA-2011</i>   | HQ843081 |
| Monocotyledons | Eriocaulaceae | <i>Paepalanthus</i>  | <i>Paepalanthus sp. MJGA-2011</i>   | HQ843082 |
| Monocotyledons | Orchidaceae   | <i>Holcoglossum</i>  | <i>Holcoglossum quasipinifolium</i> | HQ404462 |
| Monocotyledons | Orchidaceae   | <i>Holcoglossum</i>  | <i>Holcoglossum quasipinifolium</i> | HQ404463 |
| Monocotyledons | Orchidaceae   | <i>Holcoglossum</i>  | <i>Holcoglossum quasipinifolium</i> | HQ404464 |
| Monocotyledons | Orchidaceae   | <i>Holcoglossum</i>  | <i>Holcoglossum quasipinifolium</i> | HQ404465 |
| Monocotyledons | Orchidaceae   | <i>Holcoglossum</i>  | <i>Holcoglossum quasipinifolium</i> | HQ404466 |
| Monocotyledons | Iridaceae     | <i>Iris</i>          | <i>Iris anguifuga</i>               | JN044954 |
| Monocotyledons | Iridaceae     | <i>Iris</i>          | <i>Iris anguifuga</i>               | JN044955 |
| Monocotyledons | Iridaceae     | <i>Iris</i>          | <i>Iris confusa</i>                 | JN044966 |
| Monocotyledons | Iridaceae     | <i>Iris</i>          | <i>Iris confusa</i>                 | JN044967 |
| Monocotyledons | Iridaceae     | <i>Iris</i>          | <i>Iris confusa</i>                 | JN044968 |
| Monocotyledons | Iridaceae     | <i>Iris</i>          | <i>Iris goniocarpa</i>              | JN044981 |
| Monocotyledons | Iridaceae     | <i>Iris</i>          | <i>Iris goniocarpa</i>              | JN044982 |
| Monocotyledons | Iridaceae     | <i>Iris</i>          | <i>Iris speculatrix</i>             | JN045013 |
| Monocotyledons | Iridaceae     | <i>Iris</i>          | <i>Iris speculatrix</i>             | JN045014 |
| Monocotyledons | Zingiberaceae | <i>Amomum</i>        | <i>Amomum dealbatum</i>             | JN043927 |
| Monocotyledons | Zingiberaceae | <i>Amomum</i>        | <i>Amomum dealbatum</i>             | JN043928 |
| Monocotyledons | Zingiberaceae | <i>Amomum</i>        | <i>Amomum dealbatum</i>             | JN043929 |
| Monocotyledons | Zingiberaceae | <i>Amomum</i>        | <i>Amomum microcarpum</i>           | JN043947 |
| Monocotyledons | Zingiberaceae | <i>Amomum</i>        | <i>Amomum microcarpum</i>           | JN043948 |
| Monocotyledons | Zingiberaceae | <i>Amomum</i>        | <i>Amomum muricarpum</i>            | JN043949 |
| Monocotyledons | Zingiberaceae | <i>Amomum</i>        | <i>Amomum muricarpum</i>            | JN043950 |
| Monocotyledons | Zingiberaceae | <i>Amomum</i>        | <i>Amomum muricarpum</i>            | JN043951 |
| Monocotyledons | Zingiberaceae | <i>Amomum</i>        | <i>Amomum neoaurantiacum</i>        | JN043952 |
| Monocotyledons | Zingiberaceae | <i>Amomum</i>        | <i>Amomum neoaurantiacum</i>        | JN043953 |

|                |                  |                        |                                |          |
|----------------|------------------|------------------------|--------------------------------|----------|
| Monocotyledons | Zingiberaceae    | <i>Amomum</i>          | <i>Amomum neoaurantiacum</i>   | JN043954 |
| Monocotyledons | Zingiberaceae    | <i>Amomum</i>          | <i>Amomum repoeense</i>        | JN043966 |
| Monocotyledons | Zingiberaceae    | <i>Amomum</i>          | <i>Amomum repoeense</i>        | JN043967 |
| Monocotyledons | Zingiberaceae    | <i>Amomum</i>          | <i>Amomum repoeense</i>        | JN043968 |
| Monocotyledons | Zingiberaceae    | <i>Amomum</i>          | <i>Amomum repoeense</i>        | JN043969 |
| Monocotyledons | Zingiberaceae    | <i>Amomum</i>          | <i>Amomum verrucosum</i>       | JN043976 |
| Monocotyledons | Zingiberaceae    | <i>Amomum</i>          | <i>Amomum verrucosum</i>       | JN043977 |
| Monocotyledons | Zingiberaceae    | <i>Amomum</i>          | <i>Amomum verrucosum</i>       | JN043978 |
| Monocotyledons | Zingiberaceae    | <i>Amomum</i>          | <i>Amomum scarlatinum</i>      | JN043970 |
| Monocotyledons | Zingiberaceae    | <i>Amomum</i>          | <i>Amomum scarlatinum</i>      | JN043971 |
| Monocotyledons | Xanthorrhoeaceae | <i>Haworthia</i>       | <i>Haworthia mucronata</i>     | HQ646870 |
| Monocotyledons | Xanthorrhoeaceae | <i>Haworthia</i>       | <i>Haworthia mucronata</i>     | HQ646871 |
| Monocotyledons | Xanthorrhoeaceae | <i>Haworthia</i>       | <i>Haworthia pulchella</i>     | HQ646874 |
| Monocotyledons | Xanthorrhoeaceae | <i>Haworthia</i>       | <i>Haworthia pulchella</i>     | HQ646875 |
| Monocotyledons | Xanthorrhoeaceae | <i>Haworthia</i>       | <i>Haworthia rossouwii</i>     | HQ646877 |
| Monocotyledons | Xanthorrhoeaceae | <i>Haworthia</i>       | <i>Haworthia rossouwii</i>     | HQ646878 |
| Monocotyledons | Xanthorrhoeaceae | <i>Haworthia</i>       | <i>Haworthia venosa</i>        | HQ646890 |
| Monocotyledons | Xanthorrhoeaceae | <i>Haworthia</i>       | <i>Haworthia venosa</i>        | HQ646891 |
| Monocotyledons | Xanthorrhoeaceae | <i>Haworthia</i>       | <i>Haworthia venosa</i>        | HQ646892 |
| Monocotyledons | Acoraceae        | <i>Acorus</i>          | <i>Acorus calamus</i>          | DQ008899 |
| Monocotyledons | Acoraceae        | <i>Acorus</i>          | <i>Acorus calamus</i>          | EU814673 |
| Monocotyledons | Acoraceae        | <i>Acorus</i>          | <i>Acorus calamus</i>          | EU814674 |
| Monocotyledons | Acoraceae        | <i>Acorus</i>          | <i>Acorus calamus</i>          | EU814675 |
| Monocotyledons | Acoraceae        | <i>Acorus</i>          | <i>Acorus calamus</i>          | EU814676 |
| Monocotyledons | Acoraceae        | <i>Acorus</i>          | <i>Acorus calamus</i>          | JF708224 |
| Monocotyledons | Araceae          | <i>Lemna</i>           | <i>Lemna minor</i>             | FJ395556 |
| Monocotyledons | Poaceae          | <i>Oryza</i>           | <i>Oryza rufipogon</i>         | GU575244 |
| Monocotyledons | Poaceae          | <i>Oryza</i>           | <i>Oryza rufipogon</i>         | GU575248 |
| Monocotyledons | Poaceae          | <i>Oryza</i>           | <i>Oryza rufipogon</i>         | GU575259 |
| Monocotyledons | Poaceae          | <i>Oryza</i>           | <i>Oryza rufipogon</i>         | GU575260 |
| Monocotyledons | Poaceae          | <i>Oryza</i>           | <i>Oryza sativa</i>            | GU575253 |
| Monocotyledons | Poaceae          | <i>Oryza</i>           | <i>Oryza sativa</i>            | GU575271 |
| Monocotyledons | Poaceae          | <i>Oryza</i>           | <i>Oryza sativa</i>            | GU575284 |
| Monocotyledons | Poaceae          | <i>Oryza</i>           | <i>Oryza sativa</i>            | GQ435008 |
| Monocotyledons | Poaceae          | <i>Panicum</i>         | <i>Panicum miliaceum</i>       | HQ596781 |
| Monocotyledons | Poaceae          | <i>Panicum</i>         | <i>Panicum miliaceum</i>       | FR667854 |
| Monocotyledons | Poaceae          | <i>Poa</i>             | <i>Poa pratensis</i>           | FJ395514 |
| Monocotyledons | Poaceae          | <i>Poa</i>             | <i>Poa pratensis</i>           | HQ596794 |
| Monocotyledons | Poaceae          | <i>Poa</i>             | <i>Poa pratensis</i>           | FJ766223 |
| Monocotyledons | Poaceae          | <i>Bambusa</i>         | <i>Bambusa multiplex</i>       | GU390999 |
| Monocotyledons | Poaceae          | <i>Bambusa</i>         | <i>Bambusa multiplex</i>       | GU063085 |
| Monocotyledons | Poaceae          | <i>Thinopyrum</i>      | <i>Thinopyrum bessarabicum</i> | HQ221789 |
| Monocotyledons | Poaceae          | <i>Thinopyrum</i>      | <i>Thinopyrum bessarabicum</i> | HQ221813 |
| Monocotyledons | Poaceae          | <i>Thinopyrum</i>      | <i>Thinopyrum bessarabicum</i> | HQ652840 |
| Monocotyledons | Poaceae          | <i>Pseudoroegneria</i> | <i>Pseudoroegneria spicata</i> | HQ221770 |
| Monocotyledons | Poaceae          | <i>Pseudoroegneria</i> | <i>Pseudoroegneria spicata</i> | HQ652795 |
| Monocotyledons | Poaceae          | <i>Cenchrus</i>        | <i>Cenchrus ciliaris</i>       | HQ876941 |
| Monocotyledons | Poaceae          | <i>Cenchrus</i>        | <i>Cenchrus ciliaris</i>       | HQ876942 |
| Monocotyledons | Poaceae          | <i>Glyceria</i>        | <i>Glyceria borealis</i>       | DQ665463 |
| Monocotyledons | Poaceae          | <i>Glyceria</i>        | <i>Glyceria borealis</i>       | DQ665464 |
| Monocotyledons | Poaceae          | <i>Glyceria</i>        | <i>Glyceria borealis</i>       | DQ665465 |
| Monocotyledons | Poaceae          | <i>Glyceria</i>        | <i>Glyceria borealis</i>       | DQ665466 |
| Monocotyledons | Poaceae          | <i>Glyceria</i>        | <i>Glyceria borealis</i>       | DQ665467 |

|                |               |                    |                               |          |
|----------------|---------------|--------------------|-------------------------------|----------|
| Monocotyledons | Poaceae       | <i>Glyceria</i>    | <i>Glyceria borealis</i>      | DQ665468 |
| Monocotyledons | Poaceae       | <i>Glyceria</i>    | <i>Glyceria borealis</i>      | DQ665469 |
| Monocotyledons | Poaceae       | <i>Glyceria</i>    | <i>Glyceria borealis</i>      | DQ665470 |
| Monocotyledons | Poaceae       | <i>Glyceria</i>    | <i>Glyceria striata</i>       | DQ665535 |
| Monocotyledons | Poaceae       | <i>Glyceria</i>    | <i>Glyceria striata</i>       | DQ665536 |
| Monocotyledons | Poaceae       | <i>Glyceria</i>    | <i>Glyceria striata</i>       | DQ665537 |
| Monocotyledons | Poaceae       | <i>Glyceria</i>    | <i>Glyceria striata</i>       | DQ665538 |
| Monocotyledons | Poaceae       | <i>Glyceria</i>    | <i>Glyceria striata</i>       | DQ665539 |
| Monocotyledons | Poaceae       | <i>Glyceria</i>    | <i>Glyceria striata</i>       | DQ665540 |
| Monocotyledons | Poaceae       | <i>Glyceria</i>    | <i>Glyceria striata</i>       | DQ665541 |
| Monocotyledons | Poaceae       | <i>Glyceria</i>    | <i>Glyceria striata</i>       | DQ665542 |
| Monocotyledons | Poaceae       | <i>Glyceria</i>    | <i>Glyceria striata</i>       | DQ665543 |
| Monocotyledons | Poaceae       | <i>Glyceria</i>    | <i>Glyceria striata</i>       | DQ665544 |
| Monocotyledons | Poaceae       | <i>Glyceria</i>    | <i>Glyceria striata</i>       | DQ665545 |
| Monocotyledons | Poaceae       | <i>Glyceria</i>    | <i>Glyceria striata</i>       | DQ665546 |
| Monocotyledons | Poaceae       | <i>Glyceria</i>    | <i>Glyceria striata</i>       | HQ596721 |
| Monocotyledons | Poaceae       | <i>Glyceria</i>    | <i>Glyceria striata</i>       | HQ596722 |
| Monocotyledons | Poaceae       | <i>Panicum</i>     | <i>Panicum virgatum</i>       | JF901575 |
| Monocotyledons | Poaceae       | <i>Panicum</i>     | <i>Panicum virgatum</i>       | JF901576 |
| Monocotyledons | Dioscoreaceae | <i>Tacca</i>       | <i>Tacca plantaginea</i>      | JN047352 |
| Monocotyledons | Dioscoreaceae | <i>Tacca</i>       | <i>Tacca plantaginea</i>      | JN047353 |
| Monocotyledons | Dioscoreaceae | <i>Tacca</i>       | <i>Tacca plantaginea</i>      | JN047354 |
| Monocotyledons | Dioscoreaceae | <i>Tacca</i>       | <i>Tacca plantaginea</i>      | JN047355 |
| Monocotyledons | Dioscoreaceae | <i>Tacca</i>       | <i>Tacca plantaginea</i>      | JN047356 |
| Monocotyledons | Dioscoreaceae | <i>Tacca</i>       | <i>Tacca plantaginea</i>      | JN047357 |
| Monocotyledons | Dioscoreaceae | <i>Tacca</i>       | <i>Tacca plantaginea</i>      | JN047358 |
| Monocotyledons | Poaceae       | <i>Eragrostis</i>  | <i>Eragrostis cilianensis</i> | HQ876961 |
| Monocotyledons | Poaceae       | <i>Eragrostis</i>  | <i>Eragrostis cilianensis</i> | HQ876962 |
| Monocotyledons | Poaceae       | <i>Eragrostis</i>  | <i>Eragrostis cilianensis</i> | HQ876963 |
| Monocotyledons | Poaceae       | <i>Eragrostis</i>  | <i>Eragrostis cilianensis</i> | HQ876964 |
| Monocotyledons | Poaceae       | <i>Glyceria</i>    | <i>Glyceria declinata</i>     | DQ665475 |
| Monocotyledons | Poaceae       | <i>Glyceria</i>    | <i>Glyceria declinata</i>     | DQ665476 |
| Monocotyledons | Poaceae       | <i>Glyceria</i>    | <i>Glyceria declinata</i>     | DQ665477 |
| Monocotyledons | Poaceae       | <i>Glyceria</i>    | <i>Glyceria declinata</i>     | DQ665478 |
| Monocotyledons | Poaceae       | <i>Glyceria</i>    | <i>Glyceria declinata</i>     | DQ665479 |
| Monocotyledons | Poaceae       | <i>Glyceria</i>    | <i>Glyceria declinata</i>     | DQ665480 |
| Monocotyledons | Poaceae       | <i>Glyceria</i>    | <i>Glyceria declinata</i>     | DQ665481 |
| Monocotyledons | Poaceae       | <i>Glyceria</i>    | <i>Glyceria declinata</i>     | DQ665482 |
| Monocotyledons | Poaceae       | <i>Glyceria</i>    | <i>Glyceria declinata</i>     | DQ665483 |
| Monocotyledons | Poaceae       | <i>Glyceria</i>    | <i>Glyceria declinata</i>     | DQ665484 |
| Monocotyledons | Orchidaceae   | <i>Cypripedium</i> | <i>Cypripedium calceolus</i>  | GQ248281 |
| Monocotyledons | Orchidaceae   | <i>Cypripedium</i> | <i>Cypripedium calceolus</i>  | JF796982 |
| Monocotyledons | Orchidaceae   | <i>Cypripedium</i> | <i>Cypripedium flavum</i>     | JQ004986 |
| Monocotyledons | Orchidaceae   | <i>Cypripedium</i> | <i>Cypripedium flavum</i>     | JF796948 |
| Monocotyledons | Acoraceae     | <i>Acorus</i>      | <i>Acorus gramineus</i>       | GQ248236 |
| Monocotyledons | Acoraceae     | <i>Acorus</i>      | <i>Acorus gramineus</i>       | FJ874978 |
| Monocotyledons | Acoraceae     | <i>Acorus</i>      | <i>Acorus gramineus</i>       | FJ874979 |
| Monocotyledons | Acoraceae     | <i>Acorus</i>      | <i>Acorus gramineus</i>       | FJ874980 |
| Monocotyledons | Acoraceae     | <i>Acorus</i>      | <i>Acorus gramineus</i>       | FJ874981 |
| Monocotyledons | Acoraceae     | <i>Acorus</i>      | <i>Acorus gramineus</i>       | FJ874982 |
| Monocotyledons | Acoraceae     | <i>Acorus</i>      | <i>Acorus gramineus</i>       | DQ008892 |
| Monocotyledons | Acoraceae     | <i>Acorus</i>      | <i>Acorus gramineus</i>       | DQ008895 |
| Monocotyledons | Acoraceae     | <i>Acorus</i>      | <i>Acorus gramineus</i>       | DQ008898 |

|                |               |                   |                               |          |
|----------------|---------------|-------------------|-------------------------------|----------|
| Monocotyledons | Acoraceae     | <i>Acorus</i>     | <i>Acorus gramineus</i>       | EU814677 |
| Monocotyledons | Acoraceae     | <i>Acorus</i>     | <i>Acorus gramineus</i>       | EU814679 |
| Monocotyledons | Poaceae       | <i>Bambusa</i>    | <i>Bambusa vulgaris</i>       | FJ644251 |
| Monocotyledons | Poaceae       | <i>Bambusa</i>    | <i>Bambusa vulgaris</i>       | GU063097 |
| Monocotyledons | Poaceae       | <i>Bambusa</i>    | <i>Bambusa vulgaris</i>       | EF589631 |
| Monocotyledons | Poaceae       | <i>Jarava</i>     | <i>Jarava ichu</i>            | EU489267 |
| Monocotyledons | Poaceae       | <i>Jarava</i>     | <i>Jarava ichu</i>            | EU489268 |
| Monocotyledons | Dioscoreaceae | <i>Tacca</i>      | <i>Tacca leontopetaloides</i> | JN047344 |
| Monocotyledons | Dioscoreaceae | <i>Tacca</i>      | <i>Tacca leontopetaloides</i> | JN047345 |
| Monocotyledons | Dioscoreaceae | <i>Tacca</i>      | <i>Tacca leontopetaloides</i> | JN047346 |
| Monocotyledons | Dioscoreaceae | <i>Tacca</i>      | <i>Tacca leontopetaloides</i> | JN047347 |
| Monocotyledons | Dioscoreaceae | <i>Tacca</i>      | <i>Tacca leontopetaloides</i> | JN047348 |
| Monocotyledons | Dioscoreaceae | <i>Tacca</i>      | <i>Tacca leontopetaloides</i> | JN047349 |
| Monocotyledons | Dioscoreaceae | <i>Tacca</i>      | <i>Tacca leontopetaloides</i> | JN047350 |
| Monocotyledons | Dioscoreaceae | <i>Tacca</i>      | <i>Tacca leontopetaloides</i> | JN047351 |
| Monocotyledons | Poaceae       | <i>Glyceria</i>   | <i>Glyceria grandis</i>       | DQ665507 |
| Monocotyledons | Poaceae       | <i>Glyceria</i>   | <i>Glyceria grandis</i>       | DQ665508 |
| Monocotyledons | Poaceae       | <i>Glyceria</i>   | <i>Glyceria grandis</i>       | DQ665509 |
| Monocotyledons | Poaceae       | <i>Glyceria</i>   | <i>Glyceria grandis</i>       | HQ596720 |
| Monocotyledons | Dioscoreaceae | <i>Tacca</i>      | <i>Tacca chantieri</i>        | JN047324 |
| Monocotyledons | Dioscoreaceae | <i>Tacca</i>      | <i>Tacca chantieri</i>        | JN047325 |
| Monocotyledons | Dioscoreaceae | <i>Tacca</i>      | <i>Tacca chantieri</i>        | JN047326 |
| Monocotyledons | Dioscoreaceae | <i>Tacca</i>      | <i>Tacca chantieri</i>        | JN047327 |
| Monocotyledons | Dioscoreaceae | <i>Tacca</i>      | <i>Tacca chantieri</i>        | JN047328 |
| Monocotyledons | Poaceae       | <i>Thinopyrum</i> | <i>Thinopyrum intermedium</i> | HQ221771 |
| Monocotyledons | Poaceae       | <i>Thinopyrum</i> | <i>Thinopyrum intermedium</i> | HQ221772 |
| Monocotyledons | Poaceae       | <i>Thinopyrum</i> | <i>Thinopyrum intermedium</i> | HQ221773 |
| Monocotyledons | Poaceae       | <i>Thinopyrum</i> | <i>Thinopyrum intermedium</i> | HQ221774 |
| Monocotyledons | Poaceae       | <i>Thinopyrum</i> | <i>Thinopyrum intermedium</i> | HQ221775 |
| Monocotyledons | Poaceae       | <i>Thinopyrum</i> | <i>Thinopyrum intermedium</i> | HQ221776 |
| Monocotyledons | Poaceae       | <i>Thinopyrum</i> | <i>Thinopyrum intermedium</i> | HQ221777 |
| Monocotyledons | Poaceae       | <i>Thinopyrum</i> | <i>Thinopyrum intermedium</i> | HQ221778 |
| Monocotyledons | Poaceae       | <i>Thinopyrum</i> | <i>Thinopyrum intermedium</i> | HQ221779 |
| Monocotyledons | Poaceae       | <i>Thinopyrum</i> | <i>Thinopyrum intermedium</i> | HQ221780 |
| Monocotyledons | Poaceae       | <i>Thinopyrum</i> | <i>Thinopyrum intermedium</i> | HQ221781 |
| Monocotyledons | Poaceae       | <i>Thinopyrum</i> | <i>Thinopyrum intermedium</i> | HQ221782 |
| Monocotyledons | Poaceae       | <i>Thinopyrum</i> | <i>Thinopyrum intermedium</i> | HQ221783 |
| Monocotyledons | Poaceae       | <i>Thinopyrum</i> | <i>Thinopyrum intermedium</i> | HQ221784 |
| Monocotyledons | Poaceae       | <i>Thinopyrum</i> | <i>Thinopyrum intermedium</i> | HQ221785 |
| Monocotyledons | Poaceae       | <i>Thinopyrum</i> | <i>Thinopyrum intermedium</i> | HQ221786 |
| Monocotyledons | Poaceae       | <i>Thinopyrum</i> | <i>Thinopyrum intermedium</i> | HQ221787 |
| Monocotyledons | Poaceae       | <i>Thinopyrum</i> | <i>Thinopyrum intermedium</i> | HQ221788 |
| Monocotyledons | Poaceae       | <i>Thinopyrum</i> | <i>Thinopyrum intermedium</i> | HQ221790 |
| Monocotyledons | Poaceae       | <i>Thinopyrum</i> | <i>Thinopyrum intermedium</i> | HQ221792 |
| Monocotyledons | Poaceae       | <i>Thinopyrum</i> | <i>Thinopyrum intermedium</i> | HQ221793 |
| Monocotyledons | Poaceae       | <i>Thinopyrum</i> | <i>Thinopyrum intermedium</i> | HQ221794 |
| Monocotyledons | Poaceae       | <i>Thinopyrum</i> | <i>Thinopyrum intermedium</i> | HQ221795 |
| Monocotyledons | Poaceae       | <i>Thinopyrum</i> | <i>Thinopyrum intermedium</i> | HQ221796 |
| Monocotyledons | Poaceae       | <i>Thinopyrum</i> | <i>Thinopyrum intermedium</i> | HQ221797 |
| Monocotyledons | Poaceae       | <i>Thinopyrum</i> | <i>Thinopyrum intermedium</i> | HQ221798 |
| Monocotyledons | Poaceae       | <i>Thinopyrum</i> | <i>Thinopyrum intermedium</i> | HQ221799 |
| Monocotyledons | Poaceae       | <i>Thinopyrum</i> | <i>Thinopyrum intermedium</i> | HQ221800 |
| Monocotyledons | Poaceae       | <i>Thinopyrum</i> | <i>Thinopyrum intermedium</i> | HQ221801 |

|                |             |                        |                                 |          |
|----------------|-------------|------------------------|---------------------------------|----------|
| Monocotyledons | Poaceae     | <i>Thinopyrum</i>      | <i>Thinopyrum intermedium</i>   | HQ221802 |
| Monocotyledons | Poaceae     | <i>Thinopyrum</i>      | <i>Thinopyrum intermedium</i>   | HQ221803 |
| Monocotyledons | Poaceae     | <i>Thinopyrum</i>      | <i>Thinopyrum intermedium</i>   | HQ221804 |
| Monocotyledons | Poaceae     | <i>Thinopyrum</i>      | <i>Thinopyrum intermedium</i>   | HQ221805 |
| Monocotyledons | Poaceae     | <i>Thinopyrum</i>      | <i>Thinopyrum intermedium</i>   | HQ221806 |
| Monocotyledons | Poaceae     | <i>Poa</i>             | <i>Poa annua</i>                | HQ596792 |
| Monocotyledons | Poaceae     | <i>Poa</i>             | <i>Poa annua</i>                | HQ596793 |
| Monocotyledons | Poaceae     | <i>Poa</i>             | <i>Poa annua</i>                | FJ493300 |
| Monocotyledons | Poaceae     | <i>Poa</i>             | <i>Poa annua</i>                | EU750479 |
| Monocotyledons | Poaceae     | <i>Poa</i>             | <i>Poa annua</i>                | EU750480 |
| Monocotyledons | Orchidaceae | <i>Dendrobium</i>      | <i>Dendrobium nobile</i>        | FJ216469 |
| Monocotyledons | Orchidaceae | <i>Dendrobium</i>      | <i>Dendrobium nobile</i>        | FJ216482 |
| Monocotyledons | Orchidaceae | <i>Dendrobium</i>      | <i>Dendrobium nobile</i>        | GQ248287 |
| Monocotyledons | Orchidaceae | <i>Dendrobium</i>      | <i>Dendrobium nobile</i>        | EU672797 |
| Monocotyledons | Orchidaceae | <i>Dendrobium</i>      | <i>Dendrobium nobile</i>        | EF590687 |
| Monocotyledons | Orchidaceae | <i>Dendrobium</i>      | <i>Dendrobium nobile</i>        | EU887941 |
| Monocotyledons | Orchidaceae | <i>Dendrobium</i>      | <i>Dendrobium nobile</i>        | EU887942 |
| Monocotyledons | Orchidaceae | <i>Dendrobium</i>      | <i>Dendrobium fimbriatum</i>    | FJ216468 |
| Monocotyledons | Orchidaceae | <i>Dendrobium</i>      | <i>Dendrobium fimbriatum</i>    | EU672798 |
| Monocotyledons | Orchidaceae | <i>Dendrobium</i>      | <i>Dendrobium loddigesii</i>    | EU881986 |
| Monocotyledons | Orchidaceae | <i>Dendrobium</i>      | <i>Dendrobium loddigesii</i>    | EU887940 |
| Monocotyledons | Orchidaceae | <i>Dendrobium</i>      | <i>Dendrobium thyrsoiflorum</i> | EU672799 |
| Monocotyledons | Orchidaceae | <i>Dendrobium</i>      | <i>Dendrobium thyrsoiflorum</i> | EU887929 |
| Monocotyledons | Poaceae     | <i>Nassella</i>        | <i>Nassella tenuis</i>          | EU204723 |
| Monocotyledons | Poaceae     | <i>Nassella</i>        | <i>Nassella tenuis</i>          | EU204724 |
| Monocotyledons | Orchidaceae | <i>Cattleya</i>        | <i>Cattleya aclandiae</i>       | GQ248259 |
| Monocotyledons | Orchidaceae | <i>Cattleya</i>        | <i>Cattleya aclandiae</i>       | EU140023 |
| Monocotyledons | Orchidaceae | <i>Cattleya</i>        | <i>Cattleya labiata</i>         | EU140040 |
| Monocotyledons | Orchidaceae | <i>Cattleya</i>        | <i>Cattleya labiata</i>         | EU140041 |
| Monocotyledons | Acoraceae   | <i>Acorus</i>          | <i>Acorus tatarinowii</i>       | GQ435343 |
| Monocotyledons | Acoraceae   | <i>Acorus</i>          | <i>Acorus tatarinowii</i>       | GQ435344 |
| Monocotyledons | Acoraceae   | <i>Acorus</i>          | <i>Acorus tatarinowii</i>       | GQ435345 |
| Monocotyledons | Acoraceae   | <i>Acorus</i>          | <i>Acorus tatarinowii</i>       | FJ874983 |
| Monocotyledons | Acoraceae   | <i>Acorus</i>          | <i>Acorus tatarinowii</i>       | FJ874984 |
| Monocotyledons | Acoraceae   | <i>Acorus</i>          | <i>Acorus tatarinowii</i>       | FJ874985 |
| Monocotyledons | Acoraceae   | <i>Acorus</i>          | <i>Acorus tatarinowii</i>       | DQ008890 |
| Monocotyledons | Acoraceae   | <i>Acorus</i>          | <i>Acorus tatarinowii</i>       | DQ008891 |
| Monocotyledons | Acoraceae   | <i>Acorus</i>          | <i>Acorus tatarinowii</i>       | DQ008897 |
| Monocotyledons | Acoraceae   | <i>Acorus</i>          | <i>Acorus tatarinowii</i>       | EU814678 |
| Monocotyledons | Poaceae     | <i>Pseudoroegneria</i> | <i>Pseudoroegneria strigosa</i> | HQ221768 |
| Monocotyledons | Poaceae     | <i>Pseudoroegneria</i> | <i>Pseudoroegneria strigosa</i> | HQ652797 |
| Monocotyledons | Orchidaceae | <i>Oncidium</i>        | <i>Oncidium hybrid cultivar</i> | GU136268 |
| Monocotyledons | Orchidaceae | <i>Oncidium</i>        | <i>Oncidium hybrid cultivar</i> | GU136276 |
| Monocotyledons | Orchidaceae | <i>Oncidium</i>        | <i>Oncidium hybrid cultivar</i> | GU136284 |
| Monocotyledons | Orchidaceae | <i>Oncidium</i>        | <i>Oncidium hybrid cultivar</i> | GU175343 |
| Monocotyledons | Orchidaceae | <i>Oncidium</i>        | <i>Oncidium hybrid cultivar</i> | GU175351 |
| Monocotyledons | Orchidaceae | <i>Cattleya</i>        | <i>Cattleya bicolor</i>         | EU140026 |
| Monocotyledons | Orchidaceae | <i>Cattleya</i>        | <i>Cattleya bicolor</i>         | EU140027 |
| Monocotyledons | Orchidaceae | <i>Cattleya</i>        | <i>Cattleya nobilior</i>        | GQ248260 |
| Monocotyledons | Orchidaceae | <i>Cattleya</i>        | <i>Cattleya nobilior</i>        | EU140047 |
| Monocotyledons | Orchidaceae | <i>Encyclia</i>        | <i>Encyclia cordigera</i>       | EU213732 |
| Monocotyledons | Orchidaceae | <i>Encyclia</i>        | <i>Encyclia cordigera</i>       | EU213733 |
| Monocotyledons | Orchidaceae | <i>Encyclia</i>        | <i>Encyclia cordigera</i>       | EU213734 |



|                |             |                     |                                  |          |
|----------------|-------------|---------------------|----------------------------------|----------|
| Monocotyledons | Orchidaceae | <i>Encyclia</i>     | <i>Encyclia cordigera</i>        | EU213735 |
| Monocotyledons | Orchidaceae | <i>Dendrobium</i>   | <i>Dendrobium devonianum</i>     | FJ216478 |
| Monocotyledons | Orchidaceae | <i>Dendrobium</i>   | <i>Dendrobium devonianum</i>     | GQ162802 |
| Monocotyledons | Orchidaceae | <i>Dendrobium</i>   | <i>Dendrobium gratiosissimum</i> | FJ216472 |
| Monocotyledons | Orchidaceae | <i>Dendrobium</i>   | <i>Dendrobium gratiosissimum</i> | GQ153536 |
| Monocotyledons | Orchidaceae | <i>Dendrobium</i>   | <i>Dendrobium moniliforme</i>    | GQ162803 |
| Monocotyledons | Orchidaceae | <i>Dendrobium</i>   | <i>Dendrobium moniliforme</i>    | EU672796 |
| Monocotyledons | Orchidaceae | <i>Dendrobium</i>   | <i>Dendrobium moniliforme</i>    | EU887938 |
| Monocotyledons | Orchidaceae | <i>Dendrobium</i>   | <i>Dendrobium officinale</i>     | FJ216479 |
| Monocotyledons | Orchidaceae | <i>Dendrobium</i>   | <i>Dendrobium officinale</i>     | GQ153537 |
| Monocotyledons | Orchidaceae | <i>Phalaenopsis</i> | <i>Phalaenopsis amabilis</i>     | FJ460367 |
| Monocotyledons | Orchidaceae | <i>Phalaenopsis</i> | <i>Phalaenopsis amabilis</i>     | FJ460368 |
| Monocotyledons | Orchidaceae | <i>Phalaenopsis</i> | <i>Phalaenopsis amabilis</i>     | FJ460369 |
| Monocotyledons | Orchidaceae | <i>Phalaenopsis</i> | <i>Phalaenopsis amabilis</i>     | FJ460370 |
| Monocotyledons | Orchidaceae | <i>Phalaenopsis</i> | <i>Phalaenopsis amabilis</i>     | FJ460373 |
| Monocotyledons | Orchidaceae | <i>Phalaenopsis</i> | <i>Phalaenopsis amabilis</i>     | FJ460374 |
| Monocotyledons | Orchidaceae | <i>Phalaenopsis</i> | <i>Phalaenopsis amabilis</i>     | FJ460388 |
| Monocotyledons | Orchidaceae | <i>Phalaenopsis</i> | <i>Phalaenopsis amabilis</i>     | FJ460389 |
| Monocotyledons | Orchidaceae | <i>Phalaenopsis</i> | <i>Phalaenopsis amabilis</i>     | FJ460390 |
| Monocotyledons | Orchidaceae | <i>Phalaenopsis</i> | <i>Phalaenopsis amabilis</i>     | FJ460394 |
| Monocotyledons | Orchidaceae | <i>Phalaenopsis</i> | <i>Phalaenopsis amabilis</i>     | FJ460397 |
| Monocotyledons | Orchidaceae | <i>Phalaenopsis</i> | <i>Phalaenopsis amabilis</i>     | FJ460399 |
| Monocotyledons | Orchidaceae | <i>Phalaenopsis</i> | <i>Phalaenopsis amabilis</i>     | FJ460400 |
| Monocotyledons | Orchidaceae | <i>Phalaenopsis</i> | <i>Phalaenopsis amabilis</i>     | FJ460404 |
| Monocotyledons | Poaceae     | <i>Setaria</i>      | <i>Setaria verticillata</i>      | FJ766230 |
| Monocotyledons | Poaceae     | <i>Setaria</i>      | <i>Setaria verticillata</i>      | HQ876991 |
| Monocotyledons | Orchidaceae | <i>Cypripedium</i>  | <i>Cypripedium parviflorum</i>   | HQ596661 |
| Monocotyledons | Orchidaceae | <i>Cypripedium</i>  | <i>Cypripedium parviflorum</i>   | JF796968 |
| Monocotyledons | Orchidaceae | <i>Dendrobium</i>   | <i>Dendrobium crepidatum</i>     | FJ216488 |
| Monocotyledons | Orchidaceae | <i>Dendrobium</i>   | <i>Dendrobium crepidatum</i>     | GQ162800 |
| Monocotyledons | Orchidaceae | <i>Dendrobium</i>   | <i>Dendrobium crepidatum</i>     | EU887935 |
| Monocotyledons | Orchidaceae | <i>Dendrobium</i>   | <i>Dendrobium aphyllum</i>       | FJ216486 |
| Monocotyledons | Orchidaceae | <i>Dendrobium</i>   | <i>Dendrobium aphyllum</i>       | EU887939 |
| Monocotyledons | Orchidaceae | <i>Dendrobium</i>   | <i>Dendrobium chrysanthum</i>    | GQ162805 |
| Monocotyledons | Orchidaceae | <i>Dendrobium</i>   | <i>Dendrobium chrysanthum</i>    | EU887934 |
| Monocotyledons | Orchidaceae | <i>Oncidium</i>     | <i>Oncidium harryanum</i>        | FJ564027 |
| Monocotyledons | Orchidaceae | <i>Oncidium</i>     | <i>Oncidium harryanum</i>        | FJ564165 |
| Monocotyledons | Orchidaceae | <i>Oncidium</i>     | <i>Oncidium cheirophorum</i>     | FJ564148 |
| Monocotyledons | Orchidaceae | <i>Oncidium</i>     | <i>Oncidium cheirophorum</i>     | FJ564308 |
| Monocotyledons | Orchidaceae | <i>Oncidium</i>     | <i>Oncidium ghiesbreghtianum</i> | FJ564050 |
| Monocotyledons | Orchidaceae | <i>Oncidium</i>     | <i>Oncidium ghiesbreghtianum</i> | FJ564152 |
| Monocotyledons | Orchidaceae | <i>Oncidium</i>     | <i>Oncidium ghiesbreghtianum</i> | FJ564657 |
| Monocotyledons | Orchidaceae | <i>Oncidium</i>     | <i>Oncidium reichenheimii</i>    | FJ564013 |
| Monocotyledons | Orchidaceae | <i>Oncidium</i>     | <i>Oncidium reichenheimii</i>    | FJ564175 |
| Monocotyledons | Orchidaceae | <i>Oncidium</i>     | <i>Oncidium leucochilum</i>      | FJ564012 |
| Monocotyledons | Orchidaceae | <i>Oncidium</i>     | <i>Oncidium leucochilum</i>      | FJ564635 |
| Monocotyledons | Orchidaceae | <i>Oncidium</i>     | <i>Oncidium poikilostalix</i>    | FJ564029 |
| Monocotyledons | Orchidaceae | <i>Oncidium</i>     | <i>Oncidium poikilostalix</i>    | FJ564660 |
| Monocotyledons | Poaceae     | <i>Cenchrus</i>     | <i>Cenchrus purpureus</i>        | GU135321 |
| Monocotyledons | Poaceae     | <i>Cenchrus</i>     | <i>Cenchrus purpureus</i>        | GU135404 |
| Monocotyledons | Orchidaceae | <i>Oncidium</i>     | <i>Oncidium vulcanicum</i>       | FJ564153 |
| Monocotyledons | Orchidaceae | <i>Oncidium</i>     | <i>Oncidium vulcanicum</i>       | FJ564248 |
| Monocotyledons | Orchidaceae | <i>Oncidium</i>     | <i>Oncidium aureum</i>           | FJ564096 |

|                |             |                   |                                |          |
|----------------|-------------|-------------------|--------------------------------|----------|
| Monocotyledons | Orchidaceae | <i>Oncidium</i>   | <i>Oncidium aureum</i>         | FJ564562 |
| Monocotyledons | Orchidaceae | <i>Oncidium</i>   | <i>Oncidium armatum</i>        | FJ564169 |
| Monocotyledons | Orchidaceae | <i>Oncidium</i>   | <i>Oncidium armatum</i>        | FJ564193 |
| Monocotyledons | Orchidaceae | <i>Oncidium</i>   | <i>Oncidium aspidorhinum</i>   | FJ564203 |
| Monocotyledons | Orchidaceae | <i>Oncidium</i>   | <i>Oncidium aspidorhinum</i>   | FJ564256 |
| Monocotyledons | Orchidaceae | <i>Oncidium</i>   | <i>Oncidium cirrhosum</i>      | FJ564032 |
| Monocotyledons | Orchidaceae | <i>Oncidium</i>   | <i>Oncidium cirrhosum</i>      | FJ564180 |
| Monocotyledons | Orchidaceae | <i>Oncidium</i>   | <i>Oncidium cirrhosum</i>      | FJ564569 |
| Monocotyledons | Orchidaceae | <i>Oncidium</i>   | <i>Oncidium alexandrae</i>     | FJ564166 |
| Monocotyledons | Orchidaceae | <i>Oncidium</i>   | <i>Oncidium alexandrae</i>     | FJ564188 |
| Monocotyledons | Orchidaceae | <i>Oncidium</i>   | <i>Oncidium lehmannii</i>      | FJ564484 |
| Monocotyledons | Orchidaceae | <i>Oncidium</i>   | <i>Oncidium lehmannii</i>      | FJ564541 |
| Monocotyledons | Orchidaceae | <i>Oncidium</i>   | <i>Oncidium epidendroides</i>  | FJ564173 |
| Monocotyledons | Orchidaceae | <i>Oncidium</i>   | <i>Oncidium epidendroides</i>  | FJ564201 |
| Monocotyledons | Orchidaceae | <i>Oncidium</i>   | <i>Oncidium epidendroides</i>  | FJ564241 |
| Monocotyledons | Orchidaceae | <i>Oncidium</i>   | <i>Oncidium epidendroides</i>  | FJ564488 |
| Monocotyledons | Orchidaceae | <i>Oncidium</i>   | <i>Oncidium hallii</i>         | FJ563973 |
| Monocotyledons | Orchidaceae | <i>Oncidium</i>   | <i>Oncidium hallii</i>         | FJ564159 |
| Monocotyledons | Orchidaceae | <i>Oncidium</i>   | <i>Oncidium luteopurpureum</i> | FJ564071 |
| Monocotyledons | Orchidaceae | <i>Oncidium</i>   | <i>Oncidium luteopurpureum</i> | FJ564540 |
| Monocotyledons | Orchidaceae | <i>Oncidium</i>   | <i>Oncidium nevadense</i>      | FJ564090 |
| Monocotyledons | Orchidaceae | <i>Oncidium</i>   | <i>Oncidium nevadense</i>      | FJ564150 |
| Monocotyledons | Orchidaceae | <i>Oncidium</i>   | <i>Oncidium portmannii</i>     | FJ564164 |
| Monocotyledons | Orchidaceae | <i>Oncidium</i>   | <i>Oncidium portmannii</i>     | FJ564172 |
| Monocotyledons | Orchidaceae | <i>Oncidium</i>   | <i>Oncidium portmannii</i>     | FJ564490 |
| Monocotyledons | Orchidaceae | <i>Oncidium</i>   | <i>Oncidium tenuoides</i>      | FJ564192 |
| Monocotyledons | Orchidaceae | <i>Oncidium</i>   | <i>Oncidium tenuoides</i>      | FJ564531 |
| Monocotyledons | Orchidaceae | <i>Oncidium</i>   | <i>Oncidium baueri</i>         | FJ564224 |
| Monocotyledons | Orchidaceae | <i>Oncidium</i>   | <i>Oncidium baueri</i>         | FJ564534 |
| Monocotyledons | Orchidaceae | <i>Oncidium</i>   | <i>Oncidium chrysomorphum</i>  | FJ564189 |
| Monocotyledons | Orchidaceae | <i>Oncidium</i>   | <i>Oncidium chrysomorphum</i>  | FJ564513 |
| Monocotyledons | Orchidaceae | <i>Oncidium</i>   | <i>Oncidium endocharis</i>     | FJ564088 |
| Monocotyledons | Orchidaceae | <i>Oncidium</i>   | <i>Oncidium endocharis</i>     | FJ564369 |
| Monocotyledons | Orchidaceae | <i>Oncidium</i>   | <i>Oncidium fuscatum</i>       | FJ564038 |
| Monocotyledons | Orchidaceae | <i>Oncidium</i>   | <i>Oncidium fuscatum</i>       | FJ564227 |
| Monocotyledons | Orchidaceae | <i>Oncidium</i>   | <i>Oncidium heteranthum</i>    | FJ564537 |
| Monocotyledons | Orchidaceae | <i>Oncidium</i>   | <i>Oncidium heteranthum</i>    | FJ564618 |
| Monocotyledons | Orchidaceae | <i>Oncidium</i>   | <i>Oncidium incurvum</i>       | FJ564437 |
| Monocotyledons | Orchidaceae | <i>Oncidium</i>   | <i>Oncidium incurvum</i>       | FJ564630 |
| Monocotyledons | Orchidaceae | <i>Oncidium</i>   | <i>Oncidium isthmi</i>         | FJ564221 |
| Monocotyledons | Orchidaceae | <i>Oncidium</i>   | <i>Oncidium isthmi</i>         | FJ564543 |
| Monocotyledons | Orchidaceae | <i>Oncidium</i>   | <i>Oncidium retusum</i>        | FJ564005 |
| Monocotyledons | Orchidaceae | <i>Oncidium</i>   | <i>Oncidium retusum</i>        | FJ564215 |
| Monocotyledons | Orchidaceae | <i>Oncidium</i>   | <i>Oncidium retusum</i>        | FJ564578 |
| Monocotyledons | Orchidaceae | <i>Oncidium</i>   | <i>Oncidium retusum</i>        | FJ564580 |
| Monocotyledons | Orchidaceae | <i>Oncidium</i>   | <i>Oncidium gramineum</i>      | FJ564238 |
| Monocotyledons | Orchidaceae | <i>Oncidium</i>   | <i>Oncidium gramineum</i>      | FJ564500 |
| Monocotyledons | Orchidaceae | <i>Oncidium</i>   | <i>Oncidium gramineum</i>      | FJ564617 |
| Monocotyledons | Orchidaceae | <i>Oncidium</i>   | <i>Oncidium tigroides</i>      | FJ564548 |
| Monocotyledons | Orchidaceae | <i>Oncidium</i>   | <i>Oncidium tigroides</i>      | FJ564570 |
| Monocotyledons | Orchidaceae | <i>Dendrobium</i> | <i>Dendrobium chrysotoxum</i>  | EU672792 |
| Monocotyledons | Orchidaceae | <i>Dendrobium</i> | <i>Dendrobium chrysotoxum</i>  | EU887923 |
| Monocotyledons | Orchidaceae | <i>Dendrobium</i> | <i>Dendrobium chrysotoxum</i>  | EU887924 |

|                |               |                     |                                |          |
|----------------|---------------|---------------------|--------------------------------|----------|
| Monocotyledons | Orchidaceae   | <i>Dendrobium</i>   | <i>Dendrobium chrysotoxum</i>  | EU887925 |
| Monocotyledons | Orchidaceae   | <i>Dendrobium</i>   | <i>Dendrobium densiflorum</i>  | FJ216480 |
| Monocotyledons | Orchidaceae   | <i>Dendrobium</i>   | <i>Dendrobium densiflorum</i>  | FJ216487 |
| Monocotyledons | Orchidaceae   | <i>Dendrobium</i>   | <i>Dendrobium lindleyi</i>     | GQ248286 |
| Monocotyledons | Orchidaceae   | <i>Dendrobium</i>   | <i>Dendrobium lindleyi</i>     | EF590688 |
| Monocotyledons | Orchidaceae   | <i>Dendrobium</i>   | <i>Dendrobium williamsonii</i> | EU672795 |
| Monocotyledons | Orchidaceae   | <i>Dendrobium</i>   | <i>Dendrobium williamsonii</i> | EU887927 |
| Monocotyledons | Poaceae       | <i>Eragrostis</i>   | <i>Eragrostis tenuifolia</i>   | GQ248300 |
| Monocotyledons | Poaceae       | <i>Eragrostis</i>   | <i>Eragrostis tenuifolia</i>   | HQ876971 |
| Monocotyledons | Poaceae       | <i>Eragrostis</i>   | <i>Eragrostis tenuifolia</i>   | HQ876972 |
| Monocotyledons | Dioscoreaceae | <i>Tacca</i>        | <i>Tacca integrifolia</i>      | JN047329 |
| Monocotyledons | Dioscoreaceae | <i>Tacca</i>        | <i>Tacca integrifolia</i>      | JN047330 |
| Monocotyledons | Dioscoreaceae | <i>Tacca</i>        | <i>Tacca integrifolia</i>      | JN047331 |
| Monocotyledons | Dioscoreaceae | <i>Tacca</i>        | <i>Tacca integrifolia</i>      | JN047332 |
| Monocotyledons | Dioscoreaceae | <i>Tacca</i>        | <i>Tacca integrifolia</i>      | JN047333 |
| Monocotyledons | Dioscoreaceae | <i>Tacca</i>        | <i>Tacca integrifolia</i>      | JN047334 |
| Monocotyledons | Dioscoreaceae | <i>Tacca</i>        | <i>Tacca integrifolia</i>      | JN047335 |
| Monocotyledons | Dioscoreaceae | <i>Tacca</i>        | <i>Tacca integrifolia</i>      | JN047336 |
| Monocotyledons | Dioscoreaceae | <i>Tacca</i>        | <i>Tacca integrifolia</i>      | JN047337 |
| Monocotyledons | Dioscoreaceae | <i>Tacca</i>        | <i>Tacca integrifolia</i>      | JN047338 |
| Monocotyledons | Dioscoreaceae | <i>Tacca</i>        | <i>Tacca integrifolia</i>      | JN047339 |
| Monocotyledons | Dioscoreaceae | <i>Tacca</i>        | <i>Tacca integrifolia</i>      | JN047340 |
| Monocotyledons | Dioscoreaceae | <i>Tacca</i>        | <i>Tacca integrifolia</i>      | JN047341 |
| Monocotyledons | Dioscoreaceae | <i>Tacca</i>        | <i>Tacca integrifolia</i>      | JN047342 |
| Monocotyledons | Dioscoreaceae | <i>Tacca</i>        | <i>Tacca integrifolia</i>      | JN047343 |
| Monocotyledons | Orchidaceae   | <i>Dendrobium</i>   | <i>Dendrobium primulinum</i>   | GQ153535 |
| Monocotyledons | Orchidaceae   | <i>Dendrobium</i>   | <i>Dendrobium primulinum</i>   | EU887936 |
| Monocotyledons | Orchidaceae   | <i>Dendrobium</i>   | <i>Dendrobium primulinum</i>   | EU887937 |
| Monocotyledons | Orchidaceae   | <i>Dendrobium</i>   | <i>Dendrobium wardianum</i>    | GQ162801 |
| Monocotyledons | Orchidaceae   | <i>Dendrobium</i>   | <i>Dendrobium wardianum</i>    | EU887930 |
| Monocotyledons | Orchidaceae   | <i>Dendrobium</i>   | <i>Dendrobium wardianum</i>    | EU887931 |
| Monocotyledons | Orchidaceae   | <i>Dendrobium</i>   | <i>Dendrobium hancockii</i>    | FJ216481 |
| Monocotyledons | Orchidaceae   | <i>Dendrobium</i>   | <i>Dendrobium hancockii</i>    | EU672800 |
| Monocotyledons | Poaceae       | <i>Nassella</i>     | <i>Nassella trichotoma</i>     | EU489305 |
| Monocotyledons | Poaceae       | <i>Nassella</i>     | <i>Nassella trichotoma</i>     | EU204726 |
| Monocotyledons | Poaceae       | <i>Nassella</i>     | <i>Nassella trichotoma</i>     | EU204727 |
| Monocotyledons | Poaceae       | <i>Bambusa</i>      | <i>Bambusa bambos</i>          | GU390993 |
| Monocotyledons | Poaceae       | <i>Bambusa</i>      | <i>Bambusa bambos</i>          | GU063075 |
| Monocotyledons | Poaceae       | <i>Eragrostis</i>   | <i>Eragrostis heteromera</i>   | HQ876966 |
| Monocotyledons | Poaceae       | <i>Eragrostis</i>   | <i>Eragrostis heteromera</i>   | HQ876967 |
| Monocotyledons | Orchidaceae   | <i>Phalaenopsis</i> | <i>Phalaenopsis aphrodite</i>  | FJ460375 |
| Monocotyledons | Orchidaceae   | <i>Phalaenopsis</i> | <i>Phalaenopsis aphrodite</i>  | FJ460376 |
| Monocotyledons | Orchidaceae   | <i>Phalaenopsis</i> | <i>Phalaenopsis aphrodite</i>  | FJ460377 |
| Monocotyledons | Orchidaceae   | <i>Phalaenopsis</i> | <i>Phalaenopsis aphrodite</i>  | FJ460378 |
| Monocotyledons | Orchidaceae   | <i>Phalaenopsis</i> | <i>Phalaenopsis aphrodite</i>  | FJ460379 |
| Monocotyledons | Orchidaceae   | <i>Phalaenopsis</i> | <i>Phalaenopsis aphrodite</i>  | FJ460384 |
| Monocotyledons | Orchidaceae   | <i>Phalaenopsis</i> | <i>Phalaenopsis aphrodite</i>  | FJ460401 |
| Monocotyledons | Orchidaceae   | <i>Phalaenopsis</i> | <i>Phalaenopsis aphrodite</i>  | FJ460402 |
| Monocotyledons | Orchidaceae   | <i>Phalaenopsis</i> | <i>Phalaenopsis aphrodite</i>  | FJ460403 |
| Monocotyledons | Orchidaceae   | <i>Phalaenopsis</i> | <i>Phalaenopsis sandariana</i> | FJ460366 |
| Monocotyledons | Orchidaceae   | <i>Phalaenopsis</i> | <i>Phalaenopsis sandariana</i> | FJ460380 |
| Monocotyledons | Orchidaceae   | <i>Phalaenopsis</i> | <i>Phalaenopsis sandariana</i> | FJ460381 |
| Monocotyledons | Orchidaceae   | <i>Bulbophyllum</i> | <i>Bulbophyllum nutans</i>     | EF200433 |

|                |             |                     |                              |          |
|----------------|-------------|---------------------|------------------------------|----------|
| Monocotyledons | Orchidaceae | <i>Bulbophyllum</i> | <i>Bulbophyllum nutans</i>   | EF200434 |
| Monocotyledons | Orchidaceae | <i>Bulbophyllum</i> | <i>Bulbophyllum nutans</i>   | EF200435 |
| Monocotyledons | Orchidaceae | <i>Bulbophyllum</i> | <i>Bulbophyllum nutans</i>   | EF200436 |
| Monocotyledons | Poaceae     | <i>Urochloa</i>     | <i>Urochloa dictyoneura</i>  | HQ876937 |
| Monocotyledons | Poaceae     | <i>Urochloa</i>     | <i>Urochloa dictyoneura</i>  | HQ876938 |
| Monocotyledons | Poaceae     | <i>Glyceria</i>     | <i>Glyceria fluitans</i>     | DQ665497 |
| Monocotyledons | Poaceae     | <i>Glyceria</i>     | <i>Glyceria fluitans</i>     | DQ665498 |
| Monocotyledons | Poaceae     | <i>Glyceria</i>     | <i>Glyceria fluitans</i>     | DQ665499 |
| Monocotyledons | Poaceae     | <i>Glyceria</i>     | <i>Glyceria fluitans</i>     | DQ665500 |
| Monocotyledons | Poaceae     | <i>Glyceria</i>     | <i>Glyceria fluitans</i>     | DQ665501 |
| Monocotyledons | Poaceae     | <i>Glyceria</i>     | <i>Glyceria fluitans</i>     | DQ665502 |
| Monocotyledons | Poaceae     | <i>Glyceria</i>     | <i>Glyceria fluitans</i>     | DQ665503 |
| Monocotyledons | Poaceae     | <i>Glyceria</i>     | <i>Glyceria fluitans</i>     | DQ665504 |
| Monocotyledons | Poaceae     | <i>Glyceria</i>     | <i>Glyceria fluitans</i>     | DQ665505 |
| Monocotyledons | Poaceae     | <i>Glyceria</i>     | <i>Glyceria fluitans</i>     | DQ665506 |
| Monocotyledons | Acoraceae   | <i>Acorus</i>       | <i>Acorus americanus</i>     | FJ874967 |
| Monocotyledons | Acoraceae   | <i>Acorus</i>       | <i>Acorus americanus</i>     | FJ874968 |
| Monocotyledons | Acoraceae   | <i>Acorus</i>       | <i>Acorus americanus</i>     | FJ874969 |
| Monocotyledons | Acoraceae   | <i>Acorus</i>       | <i>Acorus americanus</i>     | DQ008896 |
| Monocotyledons | Acoraceae   | <i>Acorus</i>       | <i>Acorus americanus</i>     | EU814671 |
| Monocotyledons | Acoraceae   | <i>Acorus</i>       | <i>Acorus americanus</i>     | EU814672 |
| Monocotyledons | Poaceae     | <i>Poa</i>          | <i>Poa compressa</i>         | EU750481 |
| Monocotyledons | Poaceae     | <i>Poa</i>          | <i>Poa compressa</i>         | EU750482 |
| Monocotyledons | Poaceae     | <i>Poa</i>          | <i>Poa compressa</i>         | EU750483 |
| Monocotyledons | Poaceae     | <i>Setaria</i>      | <i>Setaria pumila</i>        | HQ596843 |
| Monocotyledons | Poaceae     | <i>Setaria</i>      | <i>Setaria pumila</i>        | HQ876989 |
| Monocotyledons | Poaceae     | <i>Bambusa</i>      | <i>Bambusa tuldooides</i>    | GU391001 |
| Monocotyledons | Poaceae     | <i>Bambusa</i>      | <i>Bambusa tuldooides</i>    | GU063083 |
| Monocotyledons | Poaceae     | <i>Bambusa</i>      | <i>Bambusa sinospinosa</i>   | GU391000 |
| Monocotyledons | Poaceae     | <i>Bambusa</i>      | <i>Bambusa sinospinosa</i>   | GU063077 |
| Monocotyledons | Poaceae     | <i>Bambusa</i>      | <i>Bambusa blumeana</i>      | GU390994 |
| Monocotyledons | Poaceae     | <i>Bambusa</i>      | <i>Bambusa blumeana</i>      | GU063076 |
| Monocotyledons | Poaceae     | <i>Glyceria</i>     | <i>Glyceria canadensis</i>   | DQ665471 |
| Monocotyledons | Poaceae     | <i>Glyceria</i>     | <i>Glyceria canadensis</i>   | DQ665472 |
| Monocotyledons | Poaceae     | <i>Glyceria</i>     | <i>Glyceria canadensis</i>   | DQ665473 |
| Monocotyledons | Poaceae     | <i>Glyceria</i>     | <i>Glyceria canadensis</i>   | DQ665474 |
| Monocotyledons | Poaceae     | <i>Glyceria</i>     | <i>Glyceria elata</i>        | DQ665485 |
| Monocotyledons | Poaceae     | <i>Glyceria</i>     | <i>Glyceria elata</i>        | DQ665486 |
| Monocotyledons | Poaceae     | <i>Glyceria</i>     | <i>Glyceria elata</i>        | DQ665487 |
| Monocotyledons | Poaceae     | <i>Glyceria</i>     | <i>Glyceria elata</i>        | DQ665488 |
| Monocotyledons | Poaceae     | <i>Glyceria</i>     | <i>Glyceria elata</i>        | DQ665489 |
| Monocotyledons | Poaceae     | <i>Glyceria</i>     | <i>Glyceria elata</i>        | DQ665490 |
| Monocotyledons | Poaceae     | <i>Glyceria</i>     | <i>Glyceria elata</i>        | DQ665491 |
| Monocotyledons | Poaceae     | <i>Glyceria</i>     | <i>Glyceria elata</i>        | DQ665492 |
| Monocotyledons | Poaceae     | <i>Glyceria</i>     | <i>Glyceria elata</i>        | DQ665493 |
| Monocotyledons | Poaceae     | <i>Glyceria</i>     | <i>Glyceria elata</i>        | DQ665494 |
| Monocotyledons | Poaceae     | <i>Glyceria</i>     | <i>Glyceria elata</i>        | DQ665495 |
| Monocotyledons | Poaceae     | <i>Glyceria</i>     | <i>Glyceria elata</i>        | DQ665496 |
| Monocotyledons | Poaceae     | <i>Glyceria</i>     | <i>Glyceria leptostachya</i> | DQ665510 |
| Monocotyledons | Poaceae     | <i>Glyceria</i>     | <i>Glyceria leptostachya</i> | DQ665511 |
| Monocotyledons | Poaceae     | <i>Glyceria</i>     | <i>Glyceria leptostachya</i> | DQ665512 |
| Monocotyledons | Poaceae     | <i>Glyceria</i>     | <i>Glyceria leptostachya</i> | DQ665513 |
| Monocotyledons | Poaceae     | <i>Glyceria</i>     | <i>Glyceria leptostachya</i> | DQ665514 |

|                |             |                     |                                    |          |
|----------------|-------------|---------------------|------------------------------------|----------|
| Monocotyledons | Poaceae     | <i>Glyceria</i>     | <i>Glyceria maxima</i>             | DQ665515 |
| Monocotyledons | Poaceae     | <i>Glyceria</i>     | <i>Glyceria maxima</i>             | DQ665516 |
| Monocotyledons | Poaceae     | <i>Glyceria</i>     | <i>Glyceria notata</i>             | DQ665518 |
| Monocotyledons | Poaceae     | <i>Glyceria</i>     | <i>Glyceria notata</i>             | DQ665519 |
| Monocotyledons | Poaceae     | <i>Glyceria</i>     | <i>Glyceria occidentalis</i>       | DQ665520 |
| Monocotyledons | Poaceae     | <i>Glyceria</i>     | <i>Glyceria occidentalis</i>       | DQ665521 |
| Monocotyledons | Poaceae     | <i>Glyceria</i>     | <i>Glyceria occidentalis</i>       | DQ665522 |
| Monocotyledons | Poaceae     | <i>Glyceria</i>     | <i>Glyceria occidentalis</i>       | DQ665523 |
| Monocotyledons | Poaceae     | <i>Glyceria</i>     | <i>Glyceria occidentalis</i>       | DQ665524 |
| Monocotyledons | Poaceae     | <i>Glyceria</i>     | <i>Glyceria occidentalis</i>       | DQ665525 |
| Monocotyledons | Poaceae     | <i>Glyceria</i>     | <i>Glyceria occidentalis</i>       | DQ665526 |
| Monocotyledons | Poaceae     | <i>Glyceria</i>     | <i>Glyceria occidentalis</i>       | DQ665527 |
| Monocotyledons | Poaceae     | <i>Glyceria</i>     | <i>Glyceria occidentalis</i>       | DQ665528 |
| Monocotyledons | Poaceae     | <i>Glyceria</i>     | <i>Glyceria occidentalis</i>       | DQ665529 |
| Monocotyledons | Poaceae     | <i>Glyceria</i>     | <i>Glyceria septentrionalis</i>    | DQ665530 |
| Monocotyledons | Poaceae     | <i>Glyceria</i>     | <i>Glyceria septentrionalis</i>    | DQ665531 |
| Monocotyledons | Poaceae     | <i>Glyceria</i>     | <i>Glyceria septentrionalis</i>    | DQ665532 |
| Monocotyledons | Poaceae     | <i>Glyceria</i>     | <i>Glyceria septentrionalis</i>    | DQ665533 |
| Monocotyledons | Poaceae     | <i>Glyceria</i>     | <i>Glyceria septentrionalis</i>    | DQ665534 |
| Monocotyledons | Poaceae     | <i>Jarava</i>       | <i>Jarava leptostachya</i>         | EU489270 |
| Monocotyledons | Poaceae     | <i>Jarava</i>       | <i>Jarava leptostachya</i>         | EU489271 |
| Monocotyledons | Poaceae     | <i>Nassella</i>     | <i>Nassella cordobensis</i>        | EU204713 |
| Monocotyledons | Poaceae     | <i>Nassella</i>     | <i>Nassella cordobensis</i>        | EU204714 |
| Monocotyledons | Poaceae     | <i>Nassella</i>     | <i>Nassella hyalina</i>            | EU204715 |
| Monocotyledons | Poaceae     | <i>Nassella</i>     | <i>Nassella hyalina</i>            | EU204716 |
| Monocotyledons | Poaceae     | <i>Nassella</i>     | <i>Nassella hyalina</i>            | EU204717 |
| Monocotyledons | Poaceae     | <i>Nassella</i>     | <i>Nassella neesiana</i>           | EU489297 |
| Monocotyledons | Poaceae     | <i>Nassella</i>     | <i>Nassella neesiana</i>           | EU204719 |
| Monocotyledons | Poaceae     | <i>Nassella</i>     | <i>Nassella neesiana</i>           | EU204720 |
| Monocotyledons | Orchidaceae | <i>Bulbophyllum</i> | <i>Bulbophyllum longiflorum</i>    | EF200405 |
| Monocotyledons | Orchidaceae | <i>Bulbophyllum</i> | <i>Bulbophyllum longiflorum</i>    | EF200406 |
| Monocotyledons | Poaceae     | <i>Eragrostis</i>   | <i>Eragrostis pectinacea</i>       | HQ596686 |
| Monocotyledons | Poaceae     | <i>Eragrostis</i>   | <i>Eragrostis pectinacea</i>       | HQ596687 |
| Monocotyledons | Poaceae     | <i>Eragrostis</i>   | <i>Eragrostis pectinacea</i>       | GQ248299 |
| Monocotyledons | Poaceae     | <i>Eragrostis</i>   | <i>Eragrostis pectinacea</i>       | EF590696 |
| Monocotyledons | Orchidaceae | <i>Bulbophyllum</i> | <i>Bulbophyllum analamazoatrae</i> | EF200408 |
| Monocotyledons | Orchidaceae | <i>Bulbophyllum</i> | <i>Bulbophyllum analamazoatrae</i> | EF200409 |
| Monocotyledons | Orchidaceae | <i>Bulbophyllum</i> | <i>Bulbophyllum elliotii</i>       | EF200388 |
| Monocotyledons | Orchidaceae | <i>Bulbophyllum</i> | <i>Bulbophyllum elliotii</i>       | EF200389 |
| Monocotyledons | Orchidaceae | <i>Bulbophyllum</i> | <i>Bulbophyllum elliotii</i>       | EF200390 |
| Monocotyledons | Orchidaceae | <i>Bulbophyllum</i> | <i>Bulbophyllum elliotii</i>       | EF200391 |
| Monocotyledons | Orchidaceae | <i>Bulbophyllum</i> | <i>Bulbophyllum francoisii</i>     | EF200411 |
| Monocotyledons | Orchidaceae | <i>Bulbophyllum</i> | <i>Bulbophyllum francoisii</i>     | EF200417 |
| Monocotyledons | Orchidaceae | <i>Bulbophyllum</i> | <i>Bulbophyllum henrici</i>        | EF200480 |
| Monocotyledons | Orchidaceae | <i>Bulbophyllum</i> | <i>Bulbophyllum henrici</i>        | EF200491 |
| Monocotyledons | Orchidaceae | <i>Bulbophyllum</i> | <i>Bulbophyllum longivaginans</i>  | EF200463 |
| Monocotyledons | Orchidaceae | <i>Bulbophyllum</i> | <i>Bulbophyllum longivaginans</i>  | EF200464 |
| Monocotyledons | Orchidaceae | <i>Bulbophyllum</i> | <i>Bulbophyllum matitanense</i>    | EF200393 |
| Monocotyledons | Orchidaceae | <i>Bulbophyllum</i> | <i>Bulbophyllum matitanense</i>    | EF200396 |
| Monocotyledons | Orchidaceae | <i>Bulbophyllum</i> | <i>Bulbophyllum oxycalyx</i>       | EF200412 |
| Monocotyledons | Orchidaceae | <i>Bulbophyllum</i> | <i>Bulbophyllum oxycalyx</i>       | EF200416 |
| Monocotyledons | Orchidaceae | <i>Bulbophyllum</i> | <i>Bulbophyllum pachypus</i>       | EF200466 |
| Monocotyledons | Orchidaceae | <i>Bulbophyllum</i> | <i>Bulbophyllum pachypus</i>       | EF200471 |

|                |             |                     |                                |          |
|----------------|-------------|---------------------|--------------------------------|----------|
| Monocotyledons | Orchidaceae | <i>Bulbophyllum</i> | <i>Bulbophyllum rauhii</i>     | EF200413 |
| Monocotyledons | Orchidaceae | <i>Bulbophyllum</i> | <i>Bulbophyllum rauhii</i>     | EF200414 |
| Monocotyledons | Orchidaceae | <i>Bulbophyllum</i> | <i>Bulbophyllum falcatum</i>   | GQ339616 |
| Monocotyledons | Orchidaceae | <i>Bulbophyllum</i> | <i>Bulbophyllum falcatum</i>   | JF693811 |
| Monocotyledons | Orchidaceae | <i>Cypripedium</i>  | <i>Cypripedium debile</i>      | JF796983 |
| Monocotyledons | Orchidaceae | <i>Cypripedium</i>  | <i>Cypripedium debile</i>      | JF796986 |
| Monocotyledons | Orchidaceae | <i>Cypripedium</i>  | <i>Cypripedium debile</i>      | JF796987 |
| Monocotyledons | Orchidaceae | <i>Cypripedium</i>  | <i>Cypripedium henryi</i>      | JQ080173 |
| Monocotyledons | Orchidaceae | <i>Cypripedium</i>  | <i>Cypripedium henryi</i>      | JF796956 |
| Monocotyledons | Poaceae     | <i>Jarava</i>       | <i>Jarava eriostachya</i>      | EU204702 |
| Monocotyledons | Poaceae     | <i>Jarava</i>       | <i>Jarava eriostachya</i>      | EU204703 |
| Monocotyledons | Poaceae     | <i>Jarava</i>       | <i>Jarava eriostachya</i>      | EU204704 |
| Monocotyledons | Poaceae     | <i>Jarava</i>       | <i>Jarava eriostachya</i>      | EU204705 |
| Monocotyledons | Poaceae     | <i>Jarava</i>       | <i>Jarava humilis</i>          | EU489263 |
| Monocotyledons | Poaceae     | <i>Jarava</i>       | <i>Jarava humilis</i>          | EU489264 |
| Monocotyledons | Poaceae     | <i>Jarava</i>       | <i>Jarava humilis</i>          | EU489265 |
| Monocotyledons | Poaceae     | <i>Jarava</i>       | <i>Jarava humilis</i>          | EU204732 |
| Monocotyledons | Poaceae     | <i>Jarava</i>       | <i>Jarava humilis</i>          | EU204733 |
| Monocotyledons | Orchidaceae | <i>Encyclia</i>     | <i>Encyclia alata</i>          | EU213730 |
| Monocotyledons | Orchidaceae | <i>Encyclia</i>     | <i>Encyclia alata</i>          | EU213731 |
| Monocotyledons | Orchidaceae | <i>Oncidium</i>     | <i>Oncidium obryzatoides</i>   | EU213752 |
| Monocotyledons | Orchidaceae | <i>Oncidium</i>     | <i>Oncidium obryzatoides</i>   | FJ564374 |
| Monocotyledons | Orchidaceae | <i>Oncidium</i>     | <i>Oncidium storkii</i>        | EU213753 |
| Monocotyledons | Orchidaceae | <i>Oncidium</i>     | <i>Oncidium storkii</i>        | FJ564375 |
| Monocotyledons | Poaceae     | <i>Jarava</i>       | <i>Jarava frigida</i>          | EU489260 |
| Monocotyledons | Poaceae     | <i>Jarava</i>       | <i>Jarava frigida</i>          | EU489261 |
| Monocotyledons | Orchidaceae | <i>Leochilus</i>    | <i>Leochilus inconspicuus</i>  | FJ564430 |
| Monocotyledons | Orchidaceae | <i>Leochilus</i>    | <i>Leochilus inconspicuus</i>  | FJ564440 |
| Monocotyledons | Orchidaceae | <i>Leochilus</i>    | <i>Leochilus leiboldi</i>      | FJ564139 |
| Monocotyledons | Orchidaceae | <i>Leochilus</i>    | <i>Leochilus leiboldi</i>      | FJ564428 |
| Monocotyledons | Orchidaceae | <i>Oncidium</i>     | <i>Oncidium echinops</i>       | FJ564327 |
| Monocotyledons | Orchidaceae | <i>Oncidium</i>     | <i>Oncidium echinops</i>       | FJ564505 |
| Monocotyledons | Orchidaceae | <i>Oncidium</i>     | <i>Oncidium echinops</i>       | FJ564594 |
| Monocotyledons | Orchidaceae | <i>Oncidium</i>     | <i>Oncidium peruvianoides</i>  | FJ564458 |
| Monocotyledons | Orchidaceae | <i>Oncidium</i>     | <i>Oncidium peruvianoides</i>  | FJ564512 |
| Monocotyledons | Poaceae     | <i>Tripogon</i>     | <i>Tripogon wightii</i>        | FJ610317 |
| Monocotyledons | Poaceae     | <i>Tripogon</i>     | <i>Tripogon wightii</i>        | FJ610318 |
| Monocotyledons | Poaceae     | <i>Tripogon</i>     | <i>Tripogon wightii</i>        | FJ610319 |
| Monocotyledons | Poaceae     | <i>Tripogon</i>     | <i>Tripogon wightii</i>        | FJ610320 |
| Monocotyledons | Poaceae     | <i>Tripogon</i>     | <i>Tripogon wightii</i>        | FJ610321 |
| Monocotyledons | Orchidaceae | <i>Oncidium</i>     | <i>Oncidium heterodactylum</i> | FJ564516 |
| Monocotyledons | Orchidaceae | <i>Oncidium</i>     | <i>Oncidium heterodactylum</i> | FJ564536 |
| Monocotyledons | Orchidaceae | <i>Oncidium</i>     | <i>Oncidium heterodactylum</i> | FJ564538 |
| Monocotyledons | Orchidaceae | <i>Oncidium</i>     | <i>Oncidium iricolor</i>       | FJ564371 |
| Monocotyledons | Orchidaceae | <i>Oncidium</i>     | <i>Oncidium iricolor</i>       | FJ564628 |
| Monocotyledons | Orchidaceae | <i>Oncidium</i>     | <i>Oncidium boothianum</i>     | FJ564535 |
| Monocotyledons | Orchidaceae | <i>Oncidium</i>     | <i>Oncidium boothianum</i>     | FJ564581 |
| Monocotyledons | Orchidaceae | <i>Oncidium</i>     | <i>Oncidium boothianum</i>     | FJ564588 |
| Monocotyledons | Orchidaceae | <i>Oncidium</i>     | <i>Oncidium boothianum</i>     | FJ564589 |
| Monocotyledons | Orchidaceae | <i>Oncidium</i>     | <i>Oncidium schmidtianum</i>   | FJ564514 |
| Monocotyledons | Orchidaceae | <i>Oncidium</i>     | <i>Oncidium schmidtianum</i>   | FJ564576 |
| Monocotyledons | Orchidaceae | <i>Oncidium</i>     | <i>Oncidium schroederianum</i> | FJ564198 |
| Monocotyledons | Orchidaceae | <i>Oncidium</i>     | <i>Oncidium schroederianum</i> | FJ564429 |

|                |               |                     |                               |          |
|----------------|---------------|---------------------|-------------------------------|----------|
| Monocotyledons | Orchidaceae   | <i>Cypripedium</i>  | <i>Cypripedium micranthum</i> | GQ248282 |
| Monocotyledons | Orchidaceae   | <i>Cypripedium</i>  | <i>Cypripedium micranthum</i> | JF796964 |
| Monocotyledons | Poaceae       | <i>Tripogon</i>     | <i>Tripogon copei</i>         | FJ707304 |
| Monocotyledons | Poaceae       | <i>Tripogon</i>     | <i>Tripogon copei</i>         | FJ707305 |
| Monocotyledons | Poaceae       | <i>Tripogon</i>     | <i>Tripogon copei</i>         | FJ707306 |
| Monocotyledons | Poaceae       | <i>Tripogon</i>     | <i>Tripogon copei</i>         | FJ707307 |
| Monocotyledons | Poaceae       | <i>Tripogon</i>     | <i>Tripogon copei</i>         | FJ707308 |
| Monocotyledons | Poaceae       | <i>Bambusa</i>      | <i>Bambusa distegia</i>       | GU390995 |
| Monocotyledons | Poaceae       | <i>Bambusa</i>      | <i>Bambusa distegia</i>       | GU063081 |
| Monocotyledons | Orchidaceae   | <i>Bulbophyllum</i> | <i>Bulbophyllum exaltatum</i> | GQ339640 |
| Monocotyledons | Orchidaceae   | <i>Bulbophyllum</i> | <i>Bulbophyllum exaltatum</i> | GQ339641 |
| Monocotyledons | Poaceae       | <i>Cenchrus</i>     | <i>Cenchrus stramineus</i>    | HQ876987 |
| Monocotyledons | Poaceae       | <i>Cenchrus</i>     | <i>Cenchrus stramineus</i>    | HQ876988 |
| Monocotyledons | Poaceae       | <i>Sporobolus</i>   | <i>Sporobolus ioclados</i>    | HQ876994 |
| Monocotyledons | Poaceae       | <i>Sporobolus</i>   | <i>Sporobolus ioclados</i>    | HQ876995 |
| Monocotyledons | Poaceae       | <i>Sporobolus</i>   | <i>Sporobolus rangei</i>      | HQ877000 |
| Monocotyledons | Poaceae       | <i>Sporobolus</i>   | <i>Sporobolus rangei</i>      | HQ877001 |
| Monocotyledons | Poaceae       | <i>Urochloa</i>     | <i>Urochloa brachyura</i>     | HQ877006 |
| Monocotyledons | Poaceae       | <i>Urochloa</i>     | <i>Urochloa brachyura</i>     | HQ877007 |
| Monocotyledons | Poaceae       | <i>Urochloa</i>     | <i>Urochloa brachyura</i>     | HQ877008 |
| Monocotyledons | Dioscoreaceae | <i>Tacca</i>        | <i>Tacca amplipecta</i>       | JN047314 |
| Monocotyledons | Dioscoreaceae | <i>Tacca</i>        | <i>Tacca amplipecta</i>       | JN047315 |
| Monocotyledons | Dioscoreaceae | <i>Tacca</i>        | <i>Tacca amplipecta</i>       | JN047316 |
| Monocotyledons | Dioscoreaceae | <i>Tacca</i>        | <i>Tacca amplipecta</i>       | JN047317 |
| Monocotyledons | Dioscoreaceae | <i>Tacca</i>        | <i>Tacca amplipecta</i>       | JN047318 |
| Monocotyledons | Dioscoreaceae | <i>Tacca</i>        | <i>Tacca amplipecta</i>       | JN047319 |
| Monocotyledons | Dioscoreaceae | <i>Tacca</i>        | <i>Tacca amplipecta</i>       | JN047320 |
| Monocotyledons | Dioscoreaceae | <i>Tacca</i>        | <i>Tacca amplipecta</i>       | JN047321 |
| Monocotyledons | Dioscoreaceae | <i>Tacca</i>        | <i>Tacca amplipecta</i>       | JN047322 |
| Monocotyledons | Dioscoreaceae | <i>Tacca</i>        | <i>Tacca amplipecta</i>       | JN047323 |
| Monocotyledons | Dioscoreaceae | <i>Tacca</i>        | <i>Tacca subflabellata</i>    | JN047359 |
| Monocotyledons | Dioscoreaceae | <i>Tacca</i>        | <i>Tacca subflabellata</i>    | JN047360 |
| Monocotyledons | Dioscoreaceae | <i>Tacca</i>        | <i>Tacca subflabellata</i>    | JN047361 |
| Monocotyledons | Dioscoreaceae | <i>Tacca</i>        | <i>Tacca subflabellata</i>    | JN047362 |
| Monocotyledons | Poaceae       | <i>Festuca</i>      | <i>Festuca arundinacea</i>    | HQ596699 |
| Monocotyledons | Poaceae       | <i>Festuca</i>      | <i>Festuca arundinacea</i>    | HQ596753 |
| Monocotyledons | Musaceae      | <i>Musa</i>         | <i>Musa acuminata</i>         | FJ871854 |
| Monocotyledons | Musaceae      | <i>Musa</i>         | <i>Musa acuminata</i>         | FJ871855 |
| Monocotyledons | Musaceae      | <i>Musa</i>         | <i>Musa acuminata</i>         | FJ871856 |
| Monocotyledons | Musaceae      | <i>Musa</i>         | <i>Musa acuminata</i>         | FJ871857 |
| Monocotyledons | Musaceae      | <i>Musa</i>         | <i>Musa acuminata</i>         | FJ871858 |
| Monocotyledons | Musaceae      | <i>Musa</i>         | <i>Musa acuminata</i>         | FJ871859 |
| Monocotyledons | Musaceae      | <i>Musa</i>         | <i>Musa acuminata</i>         | FJ871860 |
| Monocotyledons | Musaceae      | <i>Musa</i>         | <i>Musa acuminata</i>         | FJ871861 |
| Monocotyledons | Musaceae      | <i>Musa</i>         | <i>Musa acuminata</i>         | FJ871862 |
| Monocotyledons | Musaceae      | <i>Musa</i>         | <i>Musa acuminata</i>         | FJ871863 |
| Monocotyledons | Musaceae      | <i>Musa</i>         | <i>Musa acuminata</i>         | FJ871864 |
| Monocotyledons | Musaceae      | <i>Musa</i>         | <i>Musa acuminata</i>         | FJ871865 |
| Monocotyledons | Musaceae      | <i>Musa</i>         | <i>Musa acuminata</i>         | FJ871866 |
| Monocotyledons | Musaceae      | <i>Musa</i>         | <i>Musa acuminata</i>         | FJ871867 |
| Monocotyledons | Musaceae      | <i>Musa</i>         | <i>Musa acuminata</i>         | FJ871868 |
| Monocotyledons | Musaceae      | <i>Musa</i>         | <i>Musa acuminata</i>         | FJ871869 |
| Monocotyledons | Musaceae      | <i>Musa</i>         | <i>Musa acuminata</i>         | FJ871915 |

|                |                |                    |                               |          |
|----------------|----------------|--------------------|-------------------------------|----------|
| Monocotyledons | Musaceae       | <i>Musa</i>        | <i>Musa acuminata</i>         | FJ871916 |
| Monocotyledons | Amaryllidaceae | <i>Allium</i>      | <i>Allium tuberosum</i>       | GQ434884 |
| Monocotyledons | Amaryllidaceae | <i>Allium</i>      | <i>Allium tuberosum</i>       | GQ434885 |
| Monocotyledons | Amaryllidaceae | <i>Allium</i>      | <i>Allium tuberosum</i>       | GQ434886 |
| Monocotyledons | Amaryllidaceae | <i>Allium</i>      | <i>Allium tuberosum</i>       | GQ434887 |
| Monocotyledons | Amaryllidaceae | <i>Allium</i>      | <i>Allium tuberosum</i>       | GQ434888 |
| Monocotyledons | Asparagaceae   | <i>Asparagus</i>   | <i>Asparagus officinalis</i>  | HM990123 |
| Monocotyledons | Asparagaceae   | <i>Asparagus</i>   | <i>Asparagus officinalis</i>  | HM990126 |
| Monocotyledons | Asparagaceae   | <i>Asparagus</i>   | <i>Asparagus officinalis</i>  | HM990127 |
| Monocotyledons | Asparagaceae   | <i>Asparagus</i>   | <i>Asparagus officinalis</i>  | HM990129 |
| Monocotyledons | Asparagaceae   | <i>Asparagus</i>   | <i>Asparagus officinalis</i>  | HM990131 |
| Monocotyledons | Asparagaceae   | <i>Asparagus</i>   | <i>Asparagus officinalis</i>  | HM990132 |
| Monocotyledons | Asparagaceae   | <i>Asparagus</i>   | <i>Asparagus officinalis</i>  | HM990133 |
| Monocotyledons | Asparagaceae   | <i>Asparagus</i>   | <i>Asparagus officinalis</i>  | HM990134 |
| Monocotyledons | Asparagaceae   | <i>Asparagus</i>   | <i>Asparagus officinalis</i>  | HM990135 |
| Monocotyledons | Asparagaceae   | <i>Asparagus</i>   | <i>Asparagus officinalis</i>  | HM990136 |
| Monocotyledons | Asparagaceae   | <i>Asparagus</i>   | <i>Asparagus officinalis</i>  | HM990137 |
| Monocotyledons | Asparagaceae   | <i>Asparagus</i>   | <i>Asparagus officinalis</i>  | HM990139 |
| Monocotyledons | Asparagaceae   | <i>Asparagus</i>   | <i>Asparagus officinalis</i>  | HM990142 |
| Monocotyledons | Asparagaceae   | <i>Asparagus</i>   | <i>Asparagus officinalis</i>  | HM990143 |
| Monocotyledons | Asparagaceae   | <i>Asparagus</i>   | <i>Asparagus officinalis</i>  | HM990144 |
| Monocotyledons | Asparagaceae   | <i>Asparagus</i>   | <i>Asparagus officinalis</i>  | HM990146 |
| Monocotyledons | Asparagaceae   | <i>Asparagus</i>   | <i>Asparagus officinalis</i>  | HM990147 |
| Monocotyledons | Pandanaceae    | <i>Pandanus</i>    | <i>Pandanus tectorius</i>     | JN407018 |
| Monocotyledons | Pandanaceae    | <i>Pandanus</i>    | <i>Pandanus tectorius</i>     | JN407019 |
| Monocotyledons | Pandanaceae    | <i>Pandanus</i>    | <i>Pandanus tectorius</i>     | JN407020 |
| Monocotyledons | Typhaceae      | <i>Typha</i>       | <i>Typha latifolia</i>        | EU750605 |
| Monocotyledons | Typhaceae      | <i>Typha</i>       | <i>Typha latifolia</i>        | EU750606 |
| Monocotyledons | Typhaceae      | <i>Typha</i>       | <i>Typha latifolia</i>        | HQ913730 |
| Monocotyledons | Commelinaceae  | <i>Commelina</i>   | <i>Commelina benghalensis</i> | JN044308 |
| Monocotyledons | Commelinaceae  | <i>Commelina</i>   | <i>Commelina benghalensis</i> | JN044309 |
| Monocotyledons | Commelinaceae  | <i>Commelina</i>   | <i>Commelina benghalensis</i> | JN044310 |
| Monocotyledons | Bromeliaceae   | <i>Vriesea</i>     | <i>Vriesea malzinei</i>       | FM958006 |
| Monocotyledons | Bromeliaceae   | <i>Vriesea</i>     | <i>Vriesea malzinei</i>       | HQ913733 |
| Monocotyledons | Smilacaceae    | <i>Smilax</i>      | <i>Smilax china</i>           | GU372817 |
| Monocotyledons | Poaceae        | <i>Kengyilia</i>   | <i>Kengyilia alata</i>        | JN045083 |
| Monocotyledons | Poaceae        | <i>Kengyilia</i>   | <i>Kengyilia alata</i>        | JN045084 |
| Monocotyledons | Poaceae        | <i>Kengyilia</i>   | <i>Kengyilia alata</i>        | HQ652842 |
| Monocotyledons | Melanthiaceae  | <i>Trillium</i>    | <i>Trillium erectum</i>       | DQ404230 |
| Monocotyledons | Melanthiaceae  | <i>Trillium</i>    | <i>Trillium erectum</i>       | HQ596871 |
| Monocotyledons | Poaceae        | <i>Festuca</i>     | <i>Festuca rubra</i>          | DQ369760 |
| Monocotyledons | Poaceae        | <i>Festuca</i>     | <i>Festuca rubra</i>          | DQ369762 |
| Monocotyledons | Poaceae        | <i>Festuca</i>     | <i>Festuca rubra</i>          | FJ395494 |
| Monocotyledons | Poaceae        | <i>Piptatherum</i> | <i>Piptatherum miliaceum</i>  | EU204759 |
| Monocotyledons | Poaceae        | <i>Piptatherum</i> | <i>Piptatherum miliaceum</i>  | EU204760 |
| Monocotyledons | Poaceae        | <i>Piptatherum</i> | <i>Piptatherum miliaceum</i>  | EU204761 |
| Monocotyledons | Musaceae       | <i>Musa</i>        | <i>Musa schizocarpa</i>       | FJ871921 |
| Monocotyledons | Musaceae       | <i>Musa</i>        | <i>Musa schizocarpa</i>       | FJ871922 |
| Monocotyledons | Musaceae       | <i>Musa</i>        | <i>Musa balbisiana</i>        | FJ871870 |
| Monocotyledons | Musaceae       | <i>Musa</i>        | <i>Musa balbisiana</i>        | FJ871871 |
| Monocotyledons | Musaceae       | <i>Musa</i>        | <i>Musa balbisiana</i>        | FJ871872 |
| Monocotyledons | Musaceae       | <i>Musa</i>        | <i>Musa balbisiana</i>        | FJ871873 |
| Monocotyledons | Musaceae       | <i>Musa</i>        | <i>Musa balbisiana</i>        | FJ871874 |



|                |               |                  |                              |          |
|----------------|---------------|------------------|------------------------------|----------|
| Monocotyledons | Musaceae      | <i>Musa</i>      | <i>Musa balbisiana</i>       | FJ871876 |
| Monocotyledons | Melanthiaceae | <i>Trillium</i>  | <i>Trillium grandiflorum</i> | DQ404229 |
| Monocotyledons | Melanthiaceae | <i>Trillium</i>  | <i>Trillium grandiflorum</i> | HQ596872 |
| Monocotyledons | Dioscoreaceae | <i>Dioscorea</i> | <i>Dioscorea communis</i>    | FJ395544 |
| Monocotyledons | Typhaceae     | <i>Typha</i>     | <i>Typha angustifolia</i>    | GQ435010 |
| Monocotyledons | Typhaceae     | <i>Typha</i>     | <i>Typha angustifolia</i>    | EU750603 |
| Monocotyledons | Typhaceae     | <i>Typha</i>     | <i>Typha angustifolia</i>    | EU750604 |
| Monocotyledons | Liliaceae     | <i>Lilium</i>    | <i>Lilium pumilum</i>        | HM053713 |
| Monocotyledons | Liliaceae     | <i>Lilium</i>    | <i>Lilium pumilum</i>        | HM053714 |
| Monocotyledons | Liliaceae     | <i>Lilium</i>    | <i>Lilium pumilum</i>        | HM053715 |
| Monocotyledons | Liliaceae     | <i>Lilium</i>    | <i>Lilium pumilum</i>        | HM053716 |
| Monocotyledons | Liliaceae     | <i>Lilium</i>    | <i>Lilium pumilum</i>        | HM053717 |
| Monocotyledons | Liliaceae     | <i>Lilium</i>    | <i>Lilium pumilum</i>        | HM053718 |
| Monocotyledons | Liliaceae     | <i>Lilium</i>    | <i>Lilium pumilum</i>        | HM053719 |
| Monocotyledons | Liliaceae     | <i>Lilium</i>    | <i>Lilium pumilum</i>        | HM053720 |
| Monocotyledons | Liliaceae     | <i>Lilium</i>    | <i>Lilium pumilum</i>        | HM053721 |
| Monocotyledons | Liliaceae     | <i>Lilium</i>    | <i>Lilium pumilum</i>        | HM053722 |
| Monocotyledons | Liliaceae     | <i>Lilium</i>    | <i>Lilium pumilum</i>        | GQ434916 |
| Monocotyledons | Melanthiaceae | <i>Trillium</i>  | <i>Trillium ovatum</i>       | DQ404228 |
| Monocotyledons | Melanthiaceae | <i>Trillium</i>  | <i>Trillium ovatum</i>       | AY727187 |
| Monocotyledons | Melanthiaceae | <i>Paris</i>     | <i>Paris fargesii</i>        | DQ404251 |
| Monocotyledons | Melanthiaceae | <i>Paris</i>     | <i>Paris fargesii</i>        | JN045717 |
| Monocotyledons | Melanthiaceae | <i>Paris</i>     | <i>Paris fargesii</i>        | JN045718 |
| Monocotyledons | Melanthiaceae | <i>Paris</i>     | <i>Paris fargesii</i>        | JN045719 |
| Monocotyledons | Melanthiaceae | <i>Paris</i>     | <i>Paris fargesii</i>        | JN045720 |
| Monocotyledons | Melanthiaceae | <i>Paris</i>     | <i>Paris fargesii</i>        | JN045721 |
| Monocotyledons | Melanthiaceae | <i>Paris</i>     | <i>Paris fargesii</i>        | JN045722 |
| Monocotyledons | Melanthiaceae | <i>Paris</i>     | <i>Paris thibetica</i>       | DQ404250 |
| Monocotyledons | Melanthiaceae | <i>Paris</i>     | <i>Paris thibetica</i>       | JN045763 |
| Monocotyledons | Melanthiaceae | <i>Paris</i>     | <i>Paris thibetica</i>       | JN045764 |
| Monocotyledons | Melanthiaceae | <i>Paris</i>     | <i>Paris thibetica</i>       | JN045765 |
| Monocotyledons | Melanthiaceae | <i>Paris</i>     | <i>Paris thibetica</i>       | JN045766 |
| Monocotyledons | Melanthiaceae | <i>Paris</i>     | <i>Paris thibetica</i>       | JN045767 |
| Monocotyledons | Melanthiaceae | <i>Paris</i>     | <i>Paris thibetica</i>       | JN045768 |
| Monocotyledons | Melanthiaceae | <i>Paris</i>     | <i>Paris thibetica</i>       | JN045769 |
| Monocotyledons | Melanthiaceae | <i>Paris</i>     | <i>Paris thibetica</i>       | JN045770 |
| Monocotyledons | Melanthiaceae | <i>Paris</i>     | <i>Paris thibetica</i>       | JN045771 |
| Monocotyledons | Melanthiaceae | <i>Paris</i>     | <i>Paris incompleta</i>      | DQ404237 |
| Monocotyledons | Melanthiaceae | <i>Paris</i>     | <i>Paris incompleta</i>      | JN045723 |
| Monocotyledons | Melanthiaceae | <i>Paris</i>     | <i>Paris incompleta</i>      | JN045724 |
| Monocotyledons | Melanthiaceae | <i>Paris</i>     | <i>Paris incompleta</i>      | JN045725 |
| Monocotyledons | Liliaceae     | <i>Lilium</i>    | <i>Lilium philadelphicum</i> | DQ122704 |
| Monocotyledons | Liliaceae     | <i>Lilium</i>    | <i>Lilium philadelphicum</i> | DQ122705 |
| Monocotyledons | Liliaceae     | <i>Lilium</i>    | <i>Lilium philadelphicum</i> | DQ122706 |
| Monocotyledons | Liliaceae     | <i>Lilium</i>    | <i>Lilium philadelphicum</i> | DQ122707 |
| Monocotyledons | Liliaceae     | <i>Lilium</i>    | <i>Lilium philadelphicum</i> | DQ122708 |
| Monocotyledons | Liliaceae     | <i>Lilium</i>    | <i>Lilium philadelphicum</i> | DQ122709 |
| Monocotyledons | Liliaceae     | <i>Lilium</i>    | <i>Lilium philadelphicum</i> | DQ122710 |
| Monocotyledons | Liliaceae     | <i>Lilium</i>    | <i>Lilium philadelphicum</i> | DQ122711 |
| Monocotyledons | Liliaceae     | <i>Lilium</i>    | <i>Lilium philadelphicum</i> | DQ122712 |
| Monocotyledons | Liliaceae     | <i>Lilium</i>    | <i>Lilium philadelphicum</i> | DQ122713 |
| Monocotyledons | Liliaceae     | <i>Lilium</i>    | <i>Lilium philadelphicum</i> | DQ122714 |
| Monocotyledons | Liliaceae     | <i>Lilium</i>    | <i>Lilium philadelphicum</i> | DQ122715 |

|                |                |                  |                                  |          |
|----------------|----------------|------------------|----------------------------------|----------|
| Monocotyledons | Liliaceae      | <i>Lilium</i>    | <i>Lilium philadelphicum</i>     | DQ122716 |
| Monocotyledons | Liliaceae      | <i>Lilium</i>    | <i>Lilium philadelphicum</i>     | DQ122717 |
| Monocotyledons | Liliaceae      | <i>Lilium</i>    | <i>Lilium philadelphicum</i>     | DQ122718 |
| Monocotyledons | Liliaceae      | <i>Lilium</i>    | <i>Lilium philadelphicum</i>     | DQ122719 |
| Monocotyledons | Liliaceae      | <i>Lilium</i>    | <i>Lilium philadelphicum</i>     | DQ122720 |
| Monocotyledons | Amaryllidaceae | <i>Allium</i>    | <i>Allium macrostemon</i>        | GQ434917 |
| Monocotyledons | Amaryllidaceae | <i>Allium</i>    | <i>Allium macrostemon</i>        | GQ434918 |
| Monocotyledons | Amaryllidaceae | <i>Allium</i>    | <i>Allium macrostemon</i>        | GQ434919 |
| Monocotyledons | Poaceae        | <i>Festuca</i>   | <i>Festuca idahoensis</i>        | DQ369764 |
| Monocotyledons | Poaceae        | <i>Festuca</i>   | <i>Festuca idahoensis</i>        | DQ369766 |
| Monocotyledons | Poaceae        | <i>Festuca</i>   | <i>Festuca idahoensis</i>        | DQ369770 |
| Monocotyledons | Poaceae        | <i>Festuca</i>   | <i>Festuca idahoensis</i>        | DQ369774 |
| Monocotyledons | Poaceae        | <i>Festuca</i>   | <i>Festuca idahoensis</i>        | DQ369778 |
| Monocotyledons | Poaceae        | <i>Festuca</i>   | <i>Festuca valesiaca</i>         | DQ369758 |
| Monocotyledons | Poaceae        | <i>Festuca</i>   | <i>Festuca valesiaca</i>         | DQ369776 |
| Monocotyledons | Asparagaceae   | <i>Asparagus</i> | <i>Asparagus cochinchinensis</i> | GQ434909 |
| Monocotyledons | Asparagaceae   | <i>Asparagus</i> | <i>Asparagus cochinchinensis</i> | GQ434910 |
| Monocotyledons | Asparagaceae   | <i>Asparagus</i> | <i>Asparagus cochinchinensis</i> | GQ434911 |
| Monocotyledons | Poaceae        | <i>Kengyilia</i> | <i>Kengyilia rigidula</i>        | JN045115 |
| Monocotyledons | Poaceae        | <i>Kengyilia</i> | <i>Kengyilia rigidula</i>        | JN045116 |
| Monocotyledons | Poaceae        | <i>Kengyilia</i> | <i>Kengyilia rigidula</i>        | JN045117 |
| Monocotyledons | Poaceae        | <i>Kengyilia</i> | <i>Kengyilia rigidula</i>        | HQ221838 |
| Monocotyledons | Poaceae        | <i>Kengyilia</i> | <i>Kengyilia rigidula</i>        | HQ221841 |
| Monocotyledons | Poaceae        | <i>Kengyilia</i> | <i>Kengyilia rigidula</i>        | HQ221848 |
| Monocotyledons | Poaceae        | <i>Kengyilia</i> | <i>Kengyilia rigidula</i>        | HQ221849 |
| Monocotyledons | Poaceae        | <i>Kengyilia</i> | <i>Kengyilia rigidula</i>        | HQ221850 |
| Monocotyledons | Poaceae        | <i>Kengyilia</i> | <i>Kengyilia rigidula</i>        | HQ652818 |
| Monocotyledons | Poaceae        | <i>Kengyilia</i> | <i>Kengyilia rigidula</i>        | HQ652819 |
| Monocotyledons | Poaceae        | <i>Kengyilia</i> | <i>Kengyilia rigidula</i>        | HQ652826 |
| Monocotyledons | Poaceae        | <i>Kengyilia</i> | <i>Kengyilia rigidula</i>        | HQ652827 |
| Monocotyledons | Poaceae        | <i>Kengyilia</i> | <i>Kengyilia rigidula</i>        | HQ652830 |
| Monocotyledons | Poaceae        | <i>Kengyilia</i> | <i>Kengyilia rigidula</i>        | HQ652831 |
| Monocotyledons | Poaceae        | <i>Kengyilia</i> | <i>Kengyilia rigidula</i>        | HQ652833 |
| Monocotyledons | Poaceae        | <i>Kengyilia</i> | <i>Kengyilia grandiglumis</i>    | JN045092 |
| Monocotyledons | Poaceae        | <i>Kengyilia</i> | <i>Kengyilia grandiglumis</i>    | JN045093 |
| Monocotyledons | Poaceae        | <i>Kengyilia</i> | <i>Kengyilia grandiglumis</i>    | JN045094 |
| Monocotyledons | Poaceae        | <i>Kengyilia</i> | <i>Kengyilia grandiglumis</i>    | HQ652811 |
| Monocotyledons | Poaceae        | <i>Kengyilia</i> | <i>Kengyilia grandiglumis</i>    | HQ652829 |
| Monocotyledons | Poaceae        | <i>Kengyilia</i> | <i>Kengyilia grandiglumis</i>    | HQ652851 |
| Monocotyledons | Poaceae        | <i>Kengyilia</i> | <i>Kengyilia kokonorica</i>      | JN045098 |
| Monocotyledons | Poaceae        | <i>Kengyilia</i> | <i>Kengyilia kokonorica</i>      | JN045099 |
| Monocotyledons | Poaceae        | <i>Kengyilia</i> | <i>Kengyilia kokonorica</i>      | JN045100 |
| Monocotyledons | Poaceae        | <i>Kengyilia</i> | <i>Kengyilia kokonorica</i>      | JN045101 |
| Monocotyledons | Poaceae        | <i>Kengyilia</i> | <i>Kengyilia kokonorica</i>      | HQ652832 |
| Monocotyledons | Poaceae        | <i>Kengyilia</i> | <i>Kengyilia kokonorica</i>      | HQ652834 |
| Monocotyledons | Poaceae        | <i>Kengyilia</i> | <i>Kengyilia kokonorica</i>      | HQ652857 |
| Monocotyledons | Poaceae        | <i>Kengyilia</i> | <i>Kengyilia kokonorica</i>      | HQ652858 |
| Monocotyledons | Poaceae        | <i>Kengyilia</i> | <i>Kengyilia laxiflora</i>       | JN045102 |
| Monocotyledons | Poaceae        | <i>Kengyilia</i> | <i>Kengyilia laxiflora</i>       | JN045103 |
| Monocotyledons | Poaceae        | <i>Kengyilia</i> | <i>Kengyilia laxiflora</i>       | JN045104 |
| Monocotyledons | Poaceae        | <i>Kengyilia</i> | <i>Kengyilia laxiflora</i>       | HQ652835 |
| Monocotyledons | Poaceae        | <i>Kengyilia</i> | <i>Kengyilia laxiflora</i>       | HQ652836 |
| Monocotyledons | Poaceae        | <i>Kengyilia</i> | <i>Kengyilia laxiflora</i>       | HQ652859 |

|                |                |                    |                              |          |
|----------------|----------------|--------------------|------------------------------|----------|
| Monocotyledons | Poaceae        | <i>Kengyilia</i>   | <i>Kengyilia melanthera</i>  | JN045108 |
| Monocotyledons | Poaceae        | <i>Kengyilia</i>   | <i>Kengyilia melanthera</i>  | JN045109 |
| Monocotyledons | Poaceae        | <i>Kengyilia</i>   | <i>Kengyilia melanthera</i>  | JN045110 |
| Monocotyledons | Poaceae        | <i>Kengyilia</i>   | <i>Kengyilia melanthera</i>  | HQ221839 |
| Monocotyledons | Poaceae        | <i>Kengyilia</i>   | <i>Kengyilia melanthera</i>  | HQ221840 |
| Monocotyledons | Poaceae        | <i>Kengyilia</i>   | <i>Kengyilia melanthera</i>  | HQ221843 |
| Monocotyledons | Poaceae        | <i>Kengyilia</i>   | <i>Kengyilia melanthera</i>  | HQ221844 |
| Monocotyledons | Poaceae        | <i>Kengyilia</i>   | <i>Kengyilia melanthera</i>  | HQ221846 |
| Monocotyledons | Poaceae        | <i>Kengyilia</i>   | <i>Kengyilia melanthera</i>  | HQ652801 |
| Monocotyledons | Poaceae        | <i>Kengyilia</i>   | <i>Kengyilia melanthera</i>  | HQ652810 |
| Monocotyledons | Poaceae        | <i>Kengyilia</i>   | <i>Kengyilia melanthera</i>  | HQ652864 |
| Monocotyledons | Poaceae        | <i>Kengyilia</i>   | <i>Kengyilia melanthera</i>  | HQ652865 |
| Monocotyledons | Poaceae        | <i>Kengyilia</i>   | <i>Kengyilia melanthera</i>  | HQ652866 |
| Monocotyledons | Poaceae        | <i>Kengyilia</i>   | <i>Kengyilia mutica</i>      | JN045113 |
| Monocotyledons | Poaceae        | <i>Kengyilia</i>   | <i>Kengyilia mutica</i>      | JN045114 |
| Monocotyledons | Poaceae        | <i>Kengyilia</i>   | <i>Kengyilia mutica</i>      | HQ652823 |
| Monocotyledons | Poaceae        | <i>Kengyilia</i>   | <i>Kengyilia mutica</i>      | HQ652825 |
| Monocotyledons | Poaceae        | <i>Kengyilia</i>   | <i>Kengyilia mutica</i>      | HQ652867 |
| Monocotyledons | Poaceae        | <i>Kengyilia</i>   | <i>Kengyilia thoroldiana</i> | JN045121 |
| Monocotyledons | Poaceae        | <i>Kengyilia</i>   | <i>Kengyilia thoroldiana</i> | JN045122 |
| Monocotyledons | Poaceae        | <i>Kengyilia</i>   | <i>Kengyilia thoroldiana</i> | JN045123 |
| Monocotyledons | Poaceae        | <i>Kengyilia</i>   | <i>Kengyilia thoroldiana</i> | HQ652814 |
| Monocotyledons | Poaceae        | <i>Kengyilia</i>   | <i>Kengyilia thoroldiana</i> | HQ652815 |
| Monocotyledons | Poaceae        | <i>Kengyilia</i>   | <i>Kengyilia thoroldiana</i> | HQ652816 |
| Monocotyledons | Poaceae        | <i>Kengyilia</i>   | <i>Kengyilia thoroldiana</i> | HQ652824 |
| Monocotyledons | Poaceae        | <i>Kengyilia</i>   | <i>Kengyilia batalinii</i>   | JN045085 |
| Monocotyledons | Poaceae        | <i>Kengyilia</i>   | <i>Kengyilia batalinii</i>   | JN045086 |
| Monocotyledons | Poaceae        | <i>Kengyilia</i>   | <i>Kengyilia batalinii</i>   | JN045087 |
| Monocotyledons | Poaceae        | <i>Kengyilia</i>   | <i>Kengyilia batalinii</i>   | HQ652843 |
| Monocotyledons | Poaceae        | <i>Kengyilia</i>   | <i>Kengyilia batalinii</i>   | HQ652844 |
| Monocotyledons | Poaceae        | <i>Kengyilia</i>   | <i>Kengyilia batalinii</i>   | HQ652845 |
| Monocotyledons | Poaceae        | <i>Kengyilia</i>   | <i>Kengyilia batalinii</i>   | HQ652846 |
| Monocotyledons | Musaceae       | <i>Musa</i>        | <i>Musa basjoo</i>           | FJ871913 |
| Monocotyledons | Musaceae       | <i>Musa</i>        | <i>Musa basjoo</i>           | FJ871914 |
| Monocotyledons | Musaceae       | <i>Musa</i>        | <i>Musa basjoo</i>           | JN045497 |
| Monocotyledons | Musaceae       | <i>Musa</i>        | <i>Musa basjoo</i>           | JN045498 |
| Monocotyledons | Musaceae       | <i>Musa</i>        | <i>Musa basjoo</i>           | JN045499 |
| Monocotyledons | Amaryllidaceae | <i>Allium</i>      | <i>Allium przewalskianum</i> | GU121988 |
| Monocotyledons | Amaryllidaceae | <i>Allium</i>      | <i>Allium przewalskianum</i> | GU121989 |
| Monocotyledons | Amaryllidaceae | <i>Allium</i>      | <i>Allium przewalskianum</i> | GU121990 |
| Monocotyledons | Amaryllidaceae | <i>Allium</i>      | <i>Allium przewalskianum</i> | GU121991 |
| Monocotyledons | Liliaceae      | <i>Erythronium</i> | <i>Erythronium elegans</i>   | EU311877 |
| Monocotyledons | Liliaceae      | <i>Erythronium</i> | <i>Erythronium elegans</i>   | EU311878 |
| Monocotyledons | Liliaceae      | <i>Erythronium</i> | <i>Erythronium elegans</i>   | EU311879 |
| Monocotyledons | Liliaceae      | <i>Erythronium</i> | <i>Erythronium elegans</i>   | EU311880 |
| Monocotyledons | Liliaceae      | <i>Erythronium</i> | <i>Erythronium elegans</i>   | EU311881 |
| Monocotyledons | Liliaceae      | <i>Erythronium</i> | <i>Erythronium elegans</i>   | EU311882 |
| Monocotyledons | Liliaceae      | <i>Erythronium</i> | <i>Erythronium elegans</i>   | EU311883 |
| Monocotyledons | Liliaceae      | <i>Erythronium</i> | <i>Erythronium elegans</i>   | EU311884 |
| Monocotyledons | Liliaceae      | <i>Erythronium</i> | <i>Erythronium elegans</i>   | EU311885 |
| Monocotyledons | Liliaceae      | <i>Erythronium</i> | <i>Erythronium elegans</i>   | EU311886 |
| Monocotyledons | Liliaceae      | <i>Erythronium</i> | <i>Erythronium elegans</i>   | EU311887 |
| Monocotyledons | Liliaceae      | <i>Erythronium</i> | <i>Erythronium elegans</i>   | EU311888 |

|                |               |                     |                                   |          |
|----------------|---------------|---------------------|-----------------------------------|----------|
| Monocotyledons | Liliaceae     | <i>Erythronium</i>  | <i>Erythronium elegans</i>        | EU311889 |
| Monocotyledons | Liliaceae     | <i>Erythronium</i>  | <i>Erythronium elegans</i>        | EU311890 |
| Monocotyledons | Liliaceae     | <i>Erythronium</i>  | <i>Erythronium elegans</i>        | EU311891 |
| Monocotyledons | Liliaceae     | <i>Erythronium</i>  | <i>Erythronium elegans</i>        | EU311892 |
| Monocotyledons | Liliaceae     | <i>Erythronium</i>  | <i>Erythronium klamathense</i>    | EU311852 |
| Monocotyledons | Liliaceae     | <i>Erythronium</i>  | <i>Erythronium klamathense</i>    | EU311853 |
| Monocotyledons | Liliaceae     | <i>Erythronium</i>  | <i>Erythronium montanum</i>       | EU311854 |
| Monocotyledons | Liliaceae     | <i>Erythronium</i>  | <i>Erythronium montanum</i>       | EU311855 |
| Monocotyledons | Liliaceae     | <i>Erythronium</i>  | <i>Erythronium montanum</i>       | EU311856 |
| Monocotyledons | Liliaceae     | <i>Erythronium</i>  | <i>Erythronium montanum</i>       | EU311857 |
| Monocotyledons | Liliaceae     | <i>Erythronium</i>  | <i>Erythronium montanum</i>       | EU311858 |
| Monocotyledons | Liliaceae     | <i>Erythronium</i>  | <i>Erythronium montanum</i>       | EU311859 |
| Monocotyledons | Liliaceae     | <i>Erythronium</i>  | <i>Erythronium montanum</i>       | EU311860 |
| Monocotyledons | Liliaceae     | <i>Erythronium</i>  | <i>Erythronium montanum</i>       | EU311861 |
| Monocotyledons | Liliaceae     | <i>Erythronium</i>  | <i>Erythronium oregonum</i>       | EU311862 |
| Monocotyledons | Liliaceae     | <i>Erythronium</i>  | <i>Erythronium oregonum</i>       | EU311863 |
| Monocotyledons | Liliaceae     | <i>Erythronium</i>  | <i>Erythronium oregonum</i>       | EU311864 |
| Monocotyledons | Liliaceae     | <i>Erythronium</i>  | <i>Erythronium oregonum</i>       | EU311865 |
| Monocotyledons | Liliaceae     | <i>Erythronium</i>  | <i>Erythronium oregonum</i>       | EU311866 |
| Monocotyledons | Liliaceae     | <i>Erythronium</i>  | <i>Erythronium oregonum</i>       | EU311867 |
| Monocotyledons | Liliaceae     | <i>Erythronium</i>  | <i>Erythronium quinaultense</i>   | EU311893 |
| Monocotyledons | Liliaceae     | <i>Erythronium</i>  | <i>Erythronium quinaultense</i>   | EU311894 |
| Monocotyledons | Liliaceae     | <i>Erythronium</i>  | <i>Erythronium quinaultense</i>   | EU311895 |
| Monocotyledons | Liliaceae     | <i>Erythronium</i>  | <i>Erythronium quinaultense</i>   | EU311896 |
| Monocotyledons | Liliaceae     | <i>Erythronium</i>  | <i>Erythronium quinaultense</i>   | EU311897 |
| Monocotyledons | Liliaceae     | <i>Erythronium</i>  | <i>Erythronium quinaultense</i>   | EU311898 |
| Monocotyledons | Liliaceae     | <i>Erythronium</i>  | <i>Erythronium quinaultense</i>   | EU311899 |
| Monocotyledons | Liliaceae     | <i>Erythronium</i>  | <i>Erythronium revolutum</i>      | EU311868 |
| Monocotyledons | Liliaceae     | <i>Erythronium</i>  | <i>Erythronium revolutum</i>      | EU311869 |
| Monocotyledons | Liliaceae     | <i>Erythronium</i>  | <i>Erythronium revolutum</i>      | EU311870 |
| Monocotyledons | Liliaceae     | <i>Erythronium</i>  | <i>Erythronium revolutum</i>      | EU311871 |
| Monocotyledons | Liliaceae     | <i>Erythronium</i>  | <i>Erythronium revolutum</i>      | EU311872 |
| Monocotyledons | Liliaceae     | <i>Erythronium</i>  | <i>Erythronium revolutum</i>      | EU311873 |
| Monocotyledons | Liliaceae     | <i>Erythronium</i>  | <i>Erythronium revolutum</i>      | EU311874 |
| Monocotyledons | Liliaceae     | <i>Erythronium</i>  | <i>Erythronium revolutum</i>      | EU311875 |
| Monocotyledons | Liliaceae     | <i>Erythronium</i>  | <i>Erythronium revolutum</i>      | EU311876 |
| Monocotyledons | Colchicaceae  | <i>Androcymbium</i> | <i>Androcymbium austrocapense</i> | DQ088279 |
| Monocotyledons | Colchicaceae  | <i>Androcymbium</i> | <i>Androcymbium austrocapense</i> | DQ088280 |
| Monocotyledons | Melanthiaceae | <i>Paris</i>        | <i>Paris cronquistii</i>          | JN045701 |
| Monocotyledons | Melanthiaceae | <i>Paris</i>        | <i>Paris cronquistii</i>          | JN045702 |
| Monocotyledons | Melanthiaceae | <i>Paris</i>        | <i>Paris cronquistii</i>          | JN045703 |
| Monocotyledons | Melanthiaceae | <i>Paris</i>        | <i>Paris daliensis</i>            | DQ404260 |
| Monocotyledons | Melanthiaceae | <i>Paris</i>        | <i>Paris daliensis</i>            | JN045704 |
| Monocotyledons | Melanthiaceae | <i>Paris</i>        | <i>Paris daliensis</i>            | JN045705 |
| Monocotyledons | Melanthiaceae | <i>Paris</i>        | <i>Paris luquanensis</i>          | GU178892 |
| Monocotyledons | Melanthiaceae | <i>Paris</i>        | <i>Paris luquanensis</i>          | JN045726 |
| Monocotyledons | Melanthiaceae | <i>Paris</i>        | <i>Paris luquanensis</i>          | JN045727 |
| Monocotyledons | Melanthiaceae | <i>Paris</i>        | <i>Paris luquanensis</i>          | JN045728 |
| Monocotyledons | Melanthiaceae | <i>Paris</i>        | <i>Paris marmorata</i>            | DQ404256 |
| Monocotyledons | Melanthiaceae | <i>Paris</i>        | <i>Paris marmorata</i>            | GU178890 |
| Monocotyledons | Melanthiaceae | <i>Paris</i>        | <i>Paris marmorata</i>            | JN045735 |
| Monocotyledons | Melanthiaceae | <i>Paris</i>        | <i>Paris marmorata</i>            | JN045736 |
| Monocotyledons | Melanthiaceae | <i>Paris</i>        | <i>Paris marmorata</i>            | JN045737 |

|                |               |                     |                                |          |
|----------------|---------------|---------------------|--------------------------------|----------|
| Monocotyledons | Melanthiaceae | <i>Paris</i>        | <i>Paris marmorata</i>         | JN045738 |
| Monocotyledons | Melanthiaceae | <i>Paris</i>        | <i>Paris marmorata</i>         | JN045739 |
| Monocotyledons | Musaceae      | <i>Musa</i>         | <i>Musa textilis</i>           | FJ871897 |
| Monocotyledons | Melanthiaceae | <i>Paris</i>        | <i>Paris quadrifolia</i>       | DQ404238 |
| Monocotyledons | Melanthiaceae | <i>Paris</i>        | <i>Paris quadrifolia</i>       | JN045757 |
| Monocotyledons | Melanthiaceae | <i>Paris</i>        | <i>Paris quadrifolia</i>       | JN045758 |
| Monocotyledons | Melanthiaceae | <i>Paris</i>        | <i>Paris quadrifolia</i>       | JN045759 |
| Monocotyledons | Asparagaceae  | <i>Asparagus</i>    | <i>Asparagus densiflorus</i>   | HM990125 |
| Monocotyledons | Asparagaceae  | <i>Asparagus</i>    | <i>Asparagus densiflorus</i>   | HM990128 |
| Monocotyledons | Asparagaceae  | <i>Asparagus</i>    | <i>Asparagus densiflorus</i>   | HM990130 |
| Monocotyledons | Asparagaceae  | <i>Asparagus</i>    | <i>Asparagus densiflorus</i>   | HM990141 |
| Monocotyledons | Colchicaceae  | <i>Androcymbium</i> | <i>Androcymbium gramineum</i>  | DQ088292 |
| Monocotyledons | Colchicaceae  | <i>Androcymbium</i> | <i>Androcymbium gramineum</i>  | DQ088293 |
| Monocotyledons | Colchicaceae  | <i>Androcymbium</i> | <i>Androcymbium wyssianum</i>  | DQ088316 |
| Monocotyledons | Colchicaceae  | <i>Androcymbium</i> | <i>Androcymbium wyssianum</i>  | DQ088317 |
| Monocotyledons | Colchicaceae  | <i>Androcymbium</i> | <i>Androcymbium huntleyi</i>   | DQ088297 |
| Monocotyledons | Colchicaceae  | <i>Androcymbium</i> | <i>Androcymbium irroratum</i>  | DQ088299 |
| Monocotyledons | Bromeliaceae  | <i>Vriesea</i>      | <i>Vriesea carinata</i>        | JN204671 |
| Monocotyledons | Bromeliaceae  | <i>Vriesea</i>      | <i>Vriesea carinata</i>        | JN204672 |
| Monocotyledons | Dioscoreaceae | <i>Dioscorea</i>    | <i>Dioscorea zingiberensis</i> | JQ260269 |
| Monocotyledons | Dioscoreaceae | <i>Dioscorea</i>    | <i>Dioscorea zingiberensis</i> | JQ260270 |
| Monocotyledons | Dioscoreaceae | <i>Dioscorea</i>    | <i>Dioscorea zingiberensis</i> | JQ260275 |
| Monocotyledons | Dioscoreaceae | <i>Dioscorea</i>    | <i>Dioscorea zingiberensis</i> | DQ131105 |
| Monocotyledons | Dioscoreaceae | <i>Dioscorea</i>    | <i>Dioscorea zingiberensis</i> | DQ191747 |
| Monocotyledons | Dioscoreaceae | <i>Dioscorea</i>    | <i>Dioscorea zingiberensis</i> | DQ191749 |
| Monocotyledons | Bromeliaceae  | <i>Nidularium</i>   | <i>Nidularium procerum</i>     | JN204655 |
| Monocotyledons | Bromeliaceae  | <i>Nidularium</i>   | <i>Nidularium procerum</i>     | JN204656 |
| Monocotyledons | Poaceae       | <i>Festuca</i>      | <i>Festuca roemeri</i>         | DQ369768 |
| Monocotyledons | Poaceae       | <i>Festuca</i>      | <i>Festuca roemeri</i>         | DQ369772 |
| Monocotyledons | Poaceae       | <i>Festuca</i>      | <i>Festuca roemeri</i>         | DQ369780 |
| Monocotyledons | Poaceae       | <i>Festuca</i>      | <i>Festuca roemeri</i>         | DQ369782 |
| Monocotyledons | Poaceae       | <i>Festuca</i>      | <i>Festuca roemeri</i>         | DQ369784 |
| Monocotyledons | Poaceae       | <i>Festuca</i>      | <i>Festuca roemeri</i>         | DQ369786 |
| Monocotyledons | Poaceae       | <i>Festuca</i>      | <i>Festuca roemeri</i>         | DQ369788 |
| Monocotyledons | Poaceae       | <i>Festuca</i>      | <i>Festuca roemeri</i>         | DQ369790 |
| Monocotyledons | Melanthiaceae | <i>Paris</i>        | <i>Paris delavayi</i>          | GU178891 |
| Monocotyledons | Melanthiaceae | <i>Paris</i>        | <i>Paris delavayi</i>          | JN045706 |
| Monocotyledons | Melanthiaceae | <i>Paris</i>        | <i>Paris delavayi</i>          | JN045707 |
| Monocotyledons | Melanthiaceae | <i>Paris</i>        | <i>Paris delavayi</i>          | JN045708 |
| Monocotyledons | Melanthiaceae | <i>Paris</i>        | <i>Paris delavayi</i>          | JN045709 |
| Monocotyledons | Melanthiaceae | <i>Paris</i>        | <i>Paris delavayi</i>          | JN045710 |
| Monocotyledons | Melanthiaceae | <i>Paris</i>        | <i>Paris delavayi</i>          | JN045711 |
| Monocotyledons | Melanthiaceae | <i>Paris</i>        | <i>Paris dulongensis</i>       | DQ404241 |
| Monocotyledons | Melanthiaceae | <i>Paris</i>        | <i>Paris dulongensis</i>       | JN045712 |
| Monocotyledons | Melanthiaceae | <i>Paris</i>        | <i>Paris dulongensis</i>       | JN045713 |
| Monocotyledons | Melanthiaceae | <i>Paris</i>        | <i>Paris dunniana</i>          | DQ404259 |
| Monocotyledons | Melanthiaceae | <i>Paris</i>        | <i>Paris dunniana</i>          | JN045714 |
| Monocotyledons | Melanthiaceae | <i>Paris</i>        | <i>Paris dunniana</i>          | JN045715 |
| Monocotyledons | Melanthiaceae | <i>Paris</i>        | <i>Paris dunniana</i>          | JN045716 |
| Monocotyledons | Melanthiaceae | <i>Paris</i>        | <i>Paris mairei</i>            | DQ404247 |
| Monocotyledons | Melanthiaceae | <i>Paris</i>        | <i>Paris mairei</i>            | JN045729 |
| Monocotyledons | Melanthiaceae | <i>Paris</i>        | <i>Paris mairei</i>            | JN045730 |
| Monocotyledons | Melanthiaceae | <i>Paris</i>        | <i>Paris mairei</i>            | JN045731 |

|                |               |                   |                                |          |
|----------------|---------------|-------------------|--------------------------------|----------|
| Monocotyledons | Melanthiaceae | <i>Paris</i>      | <i>Paris mairei</i>            | JN045732 |
| Monocotyledons | Melanthiaceae | <i>Paris</i>      | <i>Paris mairei</i>            | JN045733 |
| Monocotyledons | Melanthiaceae | <i>Paris</i>      | <i>Paris mairei</i>            | JN045734 |
| Monocotyledons | Melanthiaceae | <i>Paris</i>      | <i>Paris rugosa</i>            | DQ404245 |
| Monocotyledons | Melanthiaceae | <i>Paris</i>      | <i>Paris rugosa</i>            | JN045760 |
| Monocotyledons | Melanthiaceae | <i>Paris</i>      | <i>Paris rugosa</i>            | JN045761 |
| Monocotyledons | Melanthiaceae | <i>Paris</i>      | <i>Paris rugosa</i>            | JN045762 |
| Monocotyledons | Melanthiaceae | <i>Paris</i>      | <i>Paris vaniotii</i>          | DQ404243 |
| Monocotyledons | Melanthiaceae | <i>Paris</i>      | <i>Paris vaniotii</i>          | JN045772 |
| Monocotyledons | Melanthiaceae | <i>Paris</i>      | <i>Paris vaniotii</i>          | JN045773 |
| Monocotyledons | Melanthiaceae | <i>Paris</i>      | <i>Paris vaniotii</i>          | JN045774 |
| Monocotyledons | Melanthiaceae | <i>Paris</i>      | <i>Paris vietnamensis</i>      | DQ404246 |
| Monocotyledons | Melanthiaceae | <i>Paris</i>      | <i>Paris vietnamensis</i>      | GU178893 |
| Monocotyledons | Melanthiaceae | <i>Paris</i>      | <i>Paris vietnamensis</i>      | JN045775 |
| Monocotyledons | Melanthiaceae | <i>Paris</i>      | <i>Paris vietnamensis</i>      | JN045776 |
| Monocotyledons | Melanthiaceae | <i>Paris</i>      | <i>Paris vietnamensis</i>      | JN045777 |
| Monocotyledons | Melanthiaceae | <i>Paris</i>      | <i>Paris vietnamensis</i>      | JN045778 |
| Monocotyledons | Melanthiaceae | <i>Paris</i>      | <i>Paris vietnamensis</i>      | JN045779 |
| Monocotyledons | Melanthiaceae | <i>Paris</i>      | <i>Paris vietnamensis</i>      | JN045780 |
| Monocotyledons | Poaceae       | <i>Kengyilia</i>  | <i>Kengyilia gobicola</i>      | JN045090 |
| Monocotyledons | Poaceae       | <i>Kengyilia</i>  | <i>Kengyilia gobicola</i>      | JN045091 |
| Monocotyledons | Poaceae       | <i>Kengyilia</i>  | <i>Kengyilia gobicola</i>      | HQ652849 |
| Monocotyledons | Poaceae       | <i>Kengyilia</i>  | <i>Kengyilia gobicola</i>      | HQ652850 |
| Monocotyledons | Poaceae       | <i>Kengyilia</i>  | <i>Kengyilia hirsuta</i>       | JN045095 |
| Monocotyledons | Poaceae       | <i>Kengyilia</i>  | <i>Kengyilia hirsuta</i>       | JN045096 |
| Monocotyledons | Poaceae       | <i>Kengyilia</i>  | <i>Kengyilia hirsuta</i>       | JN045097 |
| Monocotyledons | Poaceae       | <i>Kengyilia</i>  | <i>Kengyilia hirsuta</i>       | HQ652852 |
| Monocotyledons | Poaceae       | <i>Kengyilia</i>  | <i>Kengyilia hirsuta</i>       | HQ652853 |
| Monocotyledons | Poaceae       | <i>Kengyilia</i>  | <i>Kengyilia hirsuta</i>       | HQ652854 |
| Monocotyledons | Poaceae       | <i>Kengyilia</i>  | <i>Kengyilia hirsuta</i>       | HQ652855 |
| Monocotyledons | Poaceae       | <i>Kengyilia</i>  | <i>Kengyilia longiglumis</i>   | JN045105 |
| Monocotyledons | Poaceae       | <i>Kengyilia</i>  | <i>Kengyilia longiglumis</i>   | JN045106 |
| Monocotyledons | Poaceae       | <i>Kengyilia</i>  | <i>Kengyilia longiglumis</i>   | JN045107 |
| Monocotyledons | Poaceae       | <i>Kengyilia</i>  | <i>Kengyilia longiglumis</i>   | HQ652791 |
| Monocotyledons | Poaceae       | <i>Kengyilia</i>  | <i>Kengyilia longiglumis</i>   | HQ652860 |
| Monocotyledons | Poaceae       | <i>Kengyilia</i>  | <i>Kengyilia longiglumis</i>   | HQ652861 |
| Monocotyledons | Poaceae       | <i>Kengyilia</i>  | <i>Kengyilia longiglumis</i>   | HQ652862 |
| Monocotyledons | Poaceae       | <i>Kengyilia</i>  | <i>Kengyilia longiglumis</i>   | HQ652863 |
| Monocotyledons | Poaceae       | <i>Kengyilia</i>  | <i>Kengyilia stenachyra</i>    | JN045118 |
| Monocotyledons | Poaceae       | <i>Kengyilia</i>  | <i>Kengyilia stenachyra</i>    | JN045119 |
| Monocotyledons | Poaceae       | <i>Kengyilia</i>  | <i>Kengyilia stenachyra</i>    | JN045120 |
| Monocotyledons | Poaceae       | <i>Kengyilia</i>  | <i>Kengyilia stenachyra</i>    | HQ652812 |
| Monocotyledons | Poaceae       | <i>Kengyilia</i>  | <i>Kengyilia stenachyra</i>    | HQ652820 |
| Monocotyledons | Poaceae       | <i>Kengyilia</i>  | <i>Kengyilia stenachyra</i>    | HQ652828 |
| Monocotyledons | Poaceae       | <i>Kengyilia</i>  | <i>Kengyilia tahelacana</i>    | HQ652813 |
| Monocotyledons | Poaceae       | <i>Kengyilia</i>  | <i>Kengyilia tahelacana</i>    | HQ652822 |
| Monocotyledons | Commelinaceae | <i>Commelina</i>  | <i>Commelina imberbis</i>      | GQ248271 |
| Monocotyledons | Commelinaceae | <i>Commelina</i>  | <i>Commelina imberbis</i>      | EF590681 |
| Monocotyledons | Poaceae       | <i>Amelichloa</i> | <i>Amelichloa brachychaeta</i> | EU204669 |
| Monocotyledons | Poaceae       | <i>Amelichloa</i> | <i>Amelichloa brachychaeta</i> | EU204670 |
| Monocotyledons | Poaceae       | <i>Amelichloa</i> | <i>Amelichloa brachychaeta</i> | EU204671 |
| Monocotyledons | Poaceae       | <i>Amelichloa</i> | <i>Amelichloa brachychaeta</i> | EU204672 |
| Monocotyledons | Poaceae       | <i>Amelichloa</i> | <i>Amelichloa brachychaeta</i> | EU204673 |

|                |              |                      |                                |          |
|----------------|--------------|----------------------|--------------------------------|----------|
| Monocotyledons | Poaceae      | <i>Amelichloa</i>    | <i>Amelichloa brachychaeta</i> | EU204674 |
| Monocotyledons | Poaceae      | <i>Amelichloa</i>    | <i>Amelichloa caudata</i>      | EU489241 |
| Monocotyledons | Poaceae      | <i>Amelichloa</i>    | <i>Amelichloa caudata</i>      | EU204675 |
| Monocotyledons | Poaceae      | <i>Amelichloa</i>    | <i>Amelichloa caudata</i>      | EU204676 |
| Monocotyledons | Poaceae      | <i>Amelichloa</i>    | <i>Amelichloa caudata</i>      | EU204677 |
| Monocotyledons | Poaceae      | <i>Amelichloa</i>    | <i>Amelichloa caudata</i>      | EU204678 |
| Monocotyledons | Poaceae      | <i>Amelichloa</i>    | <i>Amelichloa caudata</i>      | EU204679 |
| Monocotyledons | Poaceae      | <i>Amelichloa</i>    | <i>Amelichloa clandestina</i>  | EU489242 |
| Monocotyledons | Poaceae      | <i>Amelichloa</i>    | <i>Amelichloa clandestina</i>  | EU204680 |
| Monocotyledons | Poaceae      | <i>Amelichloa</i>    | <i>Amelichloa clandestina</i>  | EU204681 |
| Monocotyledons | Poaceae      | <i>Amelichloa</i>    | <i>Amelichloa clandestina</i>  | EU204682 |
| Monocotyledons | Poaceae      | <i>Amelichloa</i>    | <i>Amelichloa clandestina</i>  | EU204683 |
| Monocotyledons | Poaceae      | <i>Piptatherum</i>   | <i>Piptatherum holciforme</i>  | EU204755 |
| Monocotyledons | Poaceae      | <i>Piptatherum</i>   | <i>Piptatherum holciforme</i>  | EU204756 |
| Monocotyledons | Musaceae     | <i>Musa</i>          | <i>Musa itinerans</i>          | FJ871877 |
| Monocotyledons | Musaceae     | <i>Musa</i>          | <i>Musa itinerans</i>          | FJ871878 |
| Monocotyledons | Musaceae     | <i>Musa</i>          | <i>Musa itinerans</i>          | FJ871879 |
| Monocotyledons | Musaceae     | <i>Musa</i>          | <i>Musa itinerans</i>          | FJ871880 |
| Monocotyledons | Musaceae     | <i>Musa</i>          | <i>Musa itinerans</i>          | FJ871881 |
| Monocotyledons | Musaceae     | <i>Musa</i>          | <i>Musa itinerans</i>          | FJ871882 |
| Monocotyledons | Musaceae     | <i>Musa</i>          | <i>Musa itinerans</i>          | FJ871884 |
| Monocotyledons | Musaceae     | <i>Musa</i>          | <i>Musa maclayi</i>            | FJ871901 |
| Monocotyledons | Musaceae     | <i>Musa</i>          | <i>Musa nagensium</i>          | FJ871919 |
| Monocotyledons | Musaceae     | <i>Musa</i>          | <i>Musa nagensium</i>          | FJ871920 |
| Monocotyledons | Musaceae     | <i>Musa</i>          | <i>Musa rubinea</i>            | FJ871889 |
| Monocotyledons | Musaceae     | <i>Musa</i>          | <i>Musa rubinea</i>            | FJ871890 |
| Monocotyledons | Musaceae     | <i>Musa</i>          | <i>Musa rubinea</i>            | FJ871891 |
| Monocotyledons | Musaceae     | <i>Musa</i>          | <i>Musa rubinea</i>            | FJ871892 |
| Monocotyledons | Musaceae     | <i>Musa</i>          | <i>Musa yunnanensis</i>        | FJ871885 |
| Monocotyledons | Musaceae     | <i>Musa</i>          | <i>Musa yunnanensis</i>        | FJ871886 |
| Monocotyledons | Musaceae     | <i>Musa</i>          | <i>Musa yunnanensis</i>        | FJ871887 |
| Monocotyledons | Musaceae     | <i>Musa</i>          | <i>Musa yunnanensis</i>        | FJ871888 |
| Monocotyledons | Orchidaceae  | <i>Grandiphyllum</i> | <i>Grandiphyllum auriculum</i> | FJ564447 |
| Monocotyledons | Orchidaceae  | <i>Grandiphyllum</i> | <i>Grandiphyllum auriculum</i> | FJ564676 |
| Monocotyledons | Orchidaceae  | <i>Grandiphyllum</i> | <i>Grandiphyllum hians</i>     | FJ564025 |
| Monocotyledons | Orchidaceae  | <i>Grandiphyllum</i> | <i>Grandiphyllum hians</i>     | FJ564235 |
| Monocotyledons | Musaceae     | <i>Musa</i>          | <i>Musa paracoccinea</i>       | FJ871904 |
| Monocotyledons | Musaceae     | <i>Musa</i>          | <i>Musa viridis</i>            | FJ871893 |
| Monocotyledons | Musaceae     | <i>Musa</i>          | <i>Musa viridis</i>            | FJ871894 |
| Monocotyledons | Musaceae     | <i>Musa</i>          | <i>Musa viridis</i>            | FJ871895 |
| Monocotyledons | Asparagaceae | <i>Asparagus</i>     | <i>Asparagus aethiopicus</i>   | GU135328 |
| Monocotyledons | Asparagaceae | <i>Asparagus</i>     | <i>Asparagus aethiopicus</i>   | GU135434 |
| Monocotyledons | Asparagaceae | <i>Asparagus</i>     | <i>Asparagus aethiopicus</i>   | HM990140 |
| Monocotyledons | Smilacaceae  | <i>Smilax</i>        | <i>Smilax glabra</i>           | GU372812 |
| Monocotyledons | Smilacaceae  | <i>Smilax</i>        | <i>Smilax glabra</i>           | GU372815 |
| Monocotyledons | Smilacaceae  | <i>Smilax</i>        | <i>Smilax glabra</i>           | JN047204 |
| Monocotyledons | Smilacaceae  | <i>Smilax</i>        | <i>Smilax glabra</i>           | JN047205 |
| Monocotyledons | Asparagaceae | <i>Asparagus</i>     | <i>Asparagus trichophyllus</i> | GQ434913 |
| Monocotyledons | Asparagaceae | <i>Asparagus</i>     | <i>Asparagus trichophyllus</i> | GQ434914 |
| Monocotyledons | Arecaceae    | <i>Caryota</i>       | <i>Caryota maxima</i>          | HQ415573 |
| Monocotyledons | Arecaceae    | <i>Caryota</i>       | <i>Caryota maxima</i>          | JF345044 |
| Monocotyledons | Arecaceae    | <i>Caryota</i>       | <i>Caryota maxima</i>          | JF345045 |
| Monocotyledons | Arecaceae    | <i>Caryota</i>       | <i>Caryota maxima</i>          | JF345050 |

|                |               |                    |                                     |          |
|----------------|---------------|--------------------|-------------------------------------|----------|
| Monocotyledons | Arecaceae     | <i>Caryota</i>     | <i>Caryota maxima</i>               | JF345051 |
| Monocotyledons | Arecaceae     | <i>Caryota</i>     | <i>Caryota maxima</i>               | JF345052 |
| Monocotyledons | Arecaceae     | <i>Caryota</i>     | <i>Caryota maxima</i>               | JF345053 |
| Monocotyledons | Arecaceae     | <i>Caryota</i>     | <i>Caryota maxima</i>               | JF345065 |
| Monocotyledons | Poaceae       | <i>Kengyilia</i>   | <i>Kengyilia geminata</i>           | JN045088 |
| Monocotyledons | Poaceae       | <i>Kengyilia</i>   | <i>Kengyilia geminata</i>           | JN045089 |
| Monocotyledons | Poaceae       | <i>Kengyilia</i>   | <i>Kengyilia geminata</i>           | HQ652847 |
| Monocotyledons | Poaceae       | <i>Kengyilia</i>   | <i>Kengyilia geminata</i>           | HQ652848 |
| Monocotyledons | Smilacaceae   | <i>Smilax</i>      | <i>Smilax lanceifolia</i>           | JN047206 |
| Monocotyledons | Smilacaceae   | <i>Smilax</i>      | <i>Smilax lanceifolia</i>           | JN047207 |
| Monocotyledons | Commelinaceae | <i>Commelina</i>   | <i>Commelina paludosa</i>           | JN044311 |
| Monocotyledons | Commelinaceae | <i>Commelina</i>   | <i>Commelina paludosa</i>           | JN044312 |
| Monocotyledons | Melanthiaceae | <i>Paris</i>       | <i>Paris caobangensis</i>           | JN045699 |
| Monocotyledons | Melanthiaceae | <i>Paris</i>       | <i>Paris caobangensis</i>           | JN045700 |
| Monocotyledons | Arecaceae     | <i>Caryota</i>     | <i>Caryota obtusa</i>               | JF345046 |
| Monocotyledons | Arecaceae     | <i>Caryota</i>     | <i>Caryota obtusa</i>               | JF345047 |
| Monocotyledons | Arecaceae     | <i>Caryota</i>     | <i>Caryota obtusa</i>               | JF345061 |
| Monocotyledons | Arecaceae     | <i>Caryota</i>     | <i>Caryota obtusa</i>               | JF345062 |
| Monocotyledons | Arecaceae     | <i>Caryota</i>     | <i>Caryota obtusa</i>               | JF345063 |
| Monocotyledons | Arecaceae     | <i>Caryota</i>     | <i>Caryota obtusa</i>               | JF345064 |
| Monocotyledons | Arecaceae     | <i>Caryota</i>     | <i>Caryota kiriwongensis</i>        | JF345048 |
| Monocotyledons | Arecaceae     | <i>Caryota</i>     | <i>Caryota kiriwongensis</i>        | JF345049 |
| Monocotyledons | Arecaceae     | <i>Caryota</i>     | <i>Caryota monostachya</i>          | JF345056 |
| Monocotyledons | Arecaceae     | <i>Caryota</i>     | <i>Caryota monostachya</i>          | JF345057 |
| Monocotyledons | Arecaceae     | <i>Caryota</i>     | <i>Caryota monostachya</i>          | JF345058 |
| Monocotyledons | Arecaceae     | <i>Caryota</i>     | <i>Caryota no</i>                   | JF345059 |
| Monocotyledons | Arecaceae     | <i>Caryota</i>     | <i>Caryota no</i>                   | JF345060 |
| Monocotyledons | Bromeliaceae  | <i>Hohenbergia</i> | <i>Hohenbergia ramageana</i>        | JN204639 |
| Monocotyledons | Bromeliaceae  | <i>Hohenbergia</i> | <i>Hohenbergia ramageana</i>        | JN204640 |
| Monocotyledons | Bromeliaceae  | <i>Hohenbergia</i> | <i>Hohenbergia ridleyi</i>          | JN204641 |
| Monocotyledons | Bromeliaceae  | <i>Hohenbergia</i> | <i>Hohenbergia ridleyi</i>          | JN204642 |
| Monocotyledons | Bromeliaceae  | <i>Nidularium</i>  | <i>Nidularium altimontanum</i>      | JN204646 |
| Monocotyledons | Bromeliaceae  | <i>Nidularium</i>  | <i>Nidularium altimontanum</i>      | JN204647 |
| Monocotyledons | Bromeliaceae  | <i>Nidularium</i>  | <i>Nidularium angustibracteatum</i> | JN204648 |
| Monocotyledons | Bromeliaceae  | <i>Nidularium</i>  | <i>Nidularium angustibracteatum</i> | JN204649 |
| Monocotyledons | Bromeliaceae  | <i>Nidularium</i>  | <i>Nidularium innocentii</i>        | JN204650 |
| Monocotyledons | Bromeliaceae  | <i>Nidularium</i>  | <i>Nidularium innocentii</i>        | JN204651 |
| Monocotyledons | Bromeliaceae  | <i>Nidularium</i>  | <i>Nidularium innocentii</i>        | JN204652 |
| Monocotyledons | Bromeliaceae  | <i>Nidularium</i>  | <i>Nidularium krisgreeniae</i>      | JN204653 |
| Monocotyledons | Bromeliaceae  | <i>Nidularium</i>  | <i>Nidularium krisgreeniae</i>      | JN204654 |
| Monocotyledons | Bromeliaceae  | <i>Pitcairnia</i>  | <i>Pitcairnia encholirioides</i>    | JN204657 |
| Monocotyledons | Bromeliaceae  | <i>Pitcairnia</i>  | <i>Pitcairnia encholirioides</i>    | JN204658 |
| Monocotyledons | Bromeliaceae  | <i>Pitcairnia</i>  | <i>Pitcairnia flammaea</i>          | JN204659 |
| Monocotyledons | Bromeliaceae  | <i>Pitcairnia</i>  | <i>Pitcairnia flammaea</i>          | JN204660 |
| Monocotyledons | Bromeliaceae  | <i>Vriesea</i>     | <i>Vriesea cacuminis</i>            | JN204669 |
| Monocotyledons | Bromeliaceae  | <i>Vriesea</i>     | <i>Vriesea cacuminis</i>            | JN204670 |
| Monocotyledons | Bromeliaceae  | <i>Vriesea</i>     | <i>Vriesea erythrodactylon</i>      | JN204675 |
| Monocotyledons | Bromeliaceae  | <i>Vriesea</i>     | <i>Vriesea erythrodactylon</i>      | JN204676 |
| Monocotyledons | Bromeliaceae  | <i>Vriesea</i>     | <i>Vriesea erythrodactylon</i>      | JN204677 |
| Monocotyledons | Bromeliaceae  | <i>Vriesea</i>     | <i>Vriesea friburgensis</i>         | JN204678 |
| Monocotyledons | Bromeliaceae  | <i>Vriesea</i>     | <i>Vriesea friburgensis</i>         | JN204679 |
| Monocotyledons | Bromeliaceae  | <i>Vriesea</i>     | <i>Vriesea friburgensis</i>         | JN204680 |
| Monocotyledons | Bromeliaceae  | <i>Vriesea</i>     | <i>Vriesea friburgensis</i>         | JN204681 |







|                |               |                     |                              |          |
|----------------|---------------|---------------------|------------------------------|----------|
| Monocotyledons | Zingiberaceae | <i>Alpinia</i>      | <i>Alpinia zerumbet</i>      | GU180444 |
| Monocotyledons | Zingiberaceae | <i>Alpinia</i>      | <i>Alpinia zerumbet</i>      | GU180445 |
| Monocotyledons | Zingiberaceae | <i>Alpinia</i>      | <i>Alpinia zerumbet</i>      | JN043874 |
| Monocotyledons | Zingiberaceae | <i>Alpinia</i>      | <i>Alpinia zerumbet</i>      | JN043875 |
| Monocotyledons | Zingiberaceae | <i>Alpinia</i>      | <i>Alpinia zerumbet</i>      | JN043876 |
| Monocotyledons | Zingiberaceae | <i>Alpinia</i>      | <i>Alpinia zerumbet</i>      | JN043877 |
| Monocotyledons | Zingiberaceae | <i>Alpinia</i>      | <i>Alpinia zerumbet</i>      | JN043878 |
| Monocotyledons | Zingiberaceae | <i>Boesenbergia</i> | <i>Boesenbergia plicata</i>  | DQ408316 |
| Monocotyledons | Zingiberaceae | <i>Boesenbergia</i> | <i>Boesenbergia plicata</i>  | DQ408317 |
| Monocotyledons | Zingiberaceae | <i>Boesenbergia</i> | <i>Boesenbergia rotunda</i>  | DQ408325 |
| Monocotyledons | Zingiberaceae | <i>Boesenbergia</i> | <i>Boesenbergia rotunda</i>  | DQ408326 |
| Monocotyledons | Zingiberaceae | <i>Boesenbergia</i> | <i>Boesenbergia rotunda</i>  | DQ408327 |
| Monocotyledons | Zingiberaceae | <i>Kaempferia</i>   | <i>Kaempferia elegans</i>    | GQ386005 |
| Monocotyledons | Zingiberaceae | <i>Kaempferia</i>   | <i>Kaempferia elegans</i>    | GQ386006 |
| Monocotyledons | Zingiberaceae | <i>Kaempferia</i>   | <i>Kaempferia elegans</i>    | GQ386007 |
| Monocotyledons | Zingiberaceae | <i>Kaempferia</i>   | <i>Kaempferia elegans</i>    | GQ386008 |
| Monocotyledons | Zingiberaceae | <i>Kaempferia</i>   | <i>Kaempferia elegans</i>    | GQ386009 |
| Monocotyledons | Zingiberaceae | <i>Kaempferia</i>   | <i>Kaempferia elegans</i>    | GQ386010 |
| Monocotyledons | Zingiberaceae | <i>Kaempferia</i>   | <i>Kaempferia elegans</i>    | GQ386011 |
| Monocotyledons | Zingiberaceae | <i>Kaempferia</i>   | <i>Kaempferia elegans</i>    | GU180452 |
| Monocotyledons | Zingiberaceae | <i>Kaempferia</i>   | <i>Kaempferia elegans</i>    | GU180453 |
| Monocotyledons | Zingiberaceae | <i>Kaempferia</i>   | <i>Kaempferia galanga</i>    | GQ385977 |
| Monocotyledons | Zingiberaceae | <i>Kaempferia</i>   | <i>Kaempferia galanga</i>    | GQ385979 |
| Monocotyledons | Zingiberaceae | <i>Kaempferia</i>   | <i>Kaempferia galanga</i>    | GQ385980 |
| Monocotyledons | Zingiberaceae | <i>Kaempferia</i>   | <i>Kaempferia galanga</i>    | GQ435048 |
| Monocotyledons | Zingiberaceae | <i>Kaempferia</i>   | <i>Kaempferia galanga</i>    | GQ435049 |
| Monocotyledons | Zingiberaceae | <i>Kaempferia</i>   | <i>Kaempferia galanga</i>    | GU180437 |
| Monocotyledons | Zingiberaceae | <i>Kaempferia</i>   | <i>Kaempferia galanga</i>    | GU180438 |
| Monocotyledons | Zingiberaceae | <i>Kaempferia</i>   | <i>Kaempferia galanga</i>    | GU180439 |
| Monocotyledons | Zingiberaceae | <i>Kaempferia</i>   | <i>Kaempferia parviflora</i> | DQ408334 |
| Monocotyledons | Zingiberaceae | <i>Kaempferia</i>   | <i>Kaempferia parviflora</i> | GQ386012 |
| Monocotyledons | Zingiberaceae | <i>Kaempferia</i>   | <i>Kaempferia parviflora</i> | GQ386013 |
| Monocotyledons | Zingiberaceae | <i>Kaempferia</i>   | <i>Kaempferia parviflora</i> | GQ386014 |
| Monocotyledons | Zingiberaceae | <i>Kaempferia</i>   | <i>Kaempferia parviflora</i> | GQ386015 |
| Monocotyledons | Zingiberaceae | <i>Kaempferia</i>   | <i>Kaempferia roscoeana</i>  | GQ386029 |
| Monocotyledons | Zingiberaceae | <i>Kaempferia</i>   | <i>Kaempferia roscoeana</i>  | GQ386030 |
| Monocotyledons | Zingiberaceae | <i>Kaempferia</i>   | <i>Kaempferia rotunda</i>    | GQ386031 |
| Monocotyledons | Zingiberaceae | <i>Kaempferia</i>   | <i>Kaempferia rotunda</i>    | GQ386032 |
| Monocotyledons | Zingiberaceae | <i>Kaempferia</i>   | <i>Kaempferia rotunda</i>    | GQ386033 |
| Monocotyledons | Zingiberaceae | <i>Kaempferia</i>   | <i>Kaempferia rotunda</i>    | GQ386034 |
| Monocotyledons | Zingiberaceae | <i>Kaempferia</i>   | <i>Kaempferia rotunda</i>    | GQ386035 |
| Monocotyledons | Zingiberaceae | <i>Kaempferia</i>   | <i>Kaempferia rotunda</i>    | GQ386036 |
| Monocotyledons | Zingiberaceae | <i>Kaempferia</i>   | <i>Kaempferia rotunda</i>    | GQ386037 |
| Monocotyledons | Zingiberaceae | <i>Kaempferia</i>   | <i>Kaempferia rotunda</i>    | GU180430 |
| Monocotyledons | Zingiberaceae | <i>Alpinia</i>      | <i>Alpinia blepharocalyx</i> | JN043817 |
| Monocotyledons | Zingiberaceae | <i>Alpinia</i>      | <i>Alpinia blepharocalyx</i> | JN043818 |
| Monocotyledons | Zingiberaceae | <i>Alpinia</i>      | <i>Alpinia blepharocalyx</i> | JN043819 |
| Monocotyledons | Zingiberaceae | <i>Alpinia</i>      | <i>Alpinia conchigera</i>    | JN043826 |
| Monocotyledons | Zingiberaceae | <i>Alpinia</i>      | <i>Alpinia conchigera</i>    | JN043827 |
| Monocotyledons | Zingiberaceae | <i>Alpinia</i>      | <i>Alpinia conchigera</i>    | JN043828 |
| Monocotyledons | Zingiberaceae | <i>Alpinia</i>      | <i>Alpinia intermedia</i>    | JN043850 |
| Monocotyledons | Zingiberaceae | <i>Alpinia</i>      | <i>Alpinia intermedia</i>    | JN043851 |
| Monocotyledons | Zingiberaceae | <i>Alpinia</i>      | <i>Alpinia intermedia</i>    | JN043852 |

|                |                |                |                             |          |
|----------------|----------------|----------------|-----------------------------|----------|
| Monocotyledons | Zingiberaceae  | <i>Alpinia</i> | <i>Alpinia intermedia</i>   | JN043853 |
| Monocotyledons | Zingiberaceae  | <i>Alpinia</i> | <i>Alpinia nigra</i>        | JN043858 |
| Monocotyledons | Zingiberaceae  | <i>Alpinia</i> | <i>Alpinia nigra</i>        | JN043859 |
| Monocotyledons | Zingiberaceae  | <i>Alpinia</i> | <i>Alpinia polyantha</i>    | GU180425 |
| Monocotyledons | Zingiberaceae  | <i>Alpinia</i> | <i>Alpinia polyantha</i>    | JN043871 |
| Monocotyledons | Zingiberaceae  | <i>Alpinia</i> | <i>Alpinia polyantha</i>    | JN043872 |
| Monocotyledons | Zingiberaceae  | <i>Alpinia</i> | <i>Alpinia polyantha</i>    | JN043873 |
| Monocotyledons | Amaryllidaceae | <i>Lycoris</i> | <i>Lycoris squamigera</i>   | GQ923941 |
| Monocotyledons | Amaryllidaceae | <i>Lycoris</i> | <i>Lycoris squamigera</i>   | HM748829 |
| Monocotyledons | Zingiberaceae  | <i>Alpinia</i> | <i>Alpinia aquatica</i>     | JN043815 |
| Monocotyledons | Zingiberaceae  | <i>Alpinia</i> | <i>Alpinia aquatica</i>     | JN043816 |
| Monocotyledons | Zingiberaceae  | <i>Alpinia</i> | <i>Alpinia formosana</i>    | JN043833 |
| Monocotyledons | Zingiberaceae  | <i>Alpinia</i> | <i>Alpinia formosana</i>    | JN043834 |
| Monocotyledons | Zingiberaceae  | <i>Alpinia</i> | <i>Alpinia guinanensis</i>  | JN043846 |
| Monocotyledons | Zingiberaceae  | <i>Alpinia</i> | <i>Alpinia guinanensis</i>  | JN043847 |
| Monocotyledons | Zingiberaceae  | <i>Alpinia</i> | <i>Alpinia hainanensis</i>  | GU180421 |
| Monocotyledons | Zingiberaceae  | <i>Alpinia</i> | <i>Alpinia hainanensis</i>  | JN043848 |
| Monocotyledons | Zingiberaceae  | <i>Alpinia</i> | <i>Alpinia hainanensis</i>  | JN043849 |
| Monocotyledons | Zingiberaceae  | <i>Alpinia</i> | <i>Alpinia oxyphylla</i>    | GU180446 |
| Monocotyledons | Zingiberaceae  | <i>Alpinia</i> | <i>Alpinia oxyphylla</i>    | GU180447 |
| Monocotyledons | Zingiberaceae  | <i>Alpinia</i> | <i>Alpinia oxyphylla</i>    | JN043863 |
| Monocotyledons | Zingiberaceae  | <i>Alpinia</i> | <i>Alpinia oxyphylla</i>    | JN043864 |
| Monocotyledons | Zingiberaceae  | <i>Alpinia</i> | <i>Alpinia oxyphylla</i>    | JN043865 |
| Monocotyledons | Zingiberaceae  | <i>Alpinia</i> | <i>Alpinia oxyphylla</i>    | JN043866 |
| Monocotyledons | Zingiberaceae  | <i>Curcuma</i> | <i>Curcuma aromatica</i>    | GQ435050 |
| Monocotyledons | Zingiberaceae  | <i>Curcuma</i> | <i>Curcuma aromatica</i>    | GU180440 |
| Monocotyledons | Zingiberaceae  | <i>Curcuma</i> | <i>Curcuma aromatica</i>    | GU180441 |
| Monocotyledons | Zingiberaceae  | <i>Curcuma</i> | <i>Curcuma aromatica</i>    | GU180442 |
| Monocotyledons | Zingiberaceae  | <i>Curcuma</i> | <i>Curcuma aromatica</i>    | GU180448 |
| Monocotyledons | Zingiberaceae  | <i>Curcuma</i> | <i>Curcuma aromatica</i>    | GU180449 |
| Monocotyledons | Zingiberaceae  | <i>Curcuma</i> | <i>Curcuma aromatica</i>    | GU180450 |
| Monocotyledons | Zingiberaceae  | <i>Curcuma</i> | <i>Curcuma aromatica</i>    | GU180451 |
| Monocotyledons | Zingiberaceae  | <i>Curcuma</i> | <i>Curcuma kwangsiensis</i> | GQ435042 |
| Monocotyledons | Zingiberaceae  | <i>Curcuma</i> | <i>Curcuma kwangsiensis</i> | GQ435043 |
| Monocotyledons | Zingiberaceae  | <i>Curcuma</i> | <i>Curcuma kwangsiensis</i> | EU552520 |
| Monocotyledons | Zingiberaceae  | <i>Curcuma</i> | <i>Curcuma kwangsiensis</i> | GU180429 |
| Monocotyledons | Zingiberaceae  | <i>Curcuma</i> | <i>Curcuma kwangsiensis</i> | JF730251 |
| Monocotyledons | Zingiberaceae  | <i>Curcuma</i> | <i>Curcuma longa</i>        | FJ687416 |
| Monocotyledons | Zingiberaceae  | <i>Curcuma</i> | <i>Curcuma longa</i>        | GU180434 |
| Monocotyledons | Zingiberaceae  | <i>Curcuma</i> | <i>Curcuma longa</i>        | GU180435 |
| Monocotyledons | Zingiberaceae  | <i>Curcuma</i> | <i>Curcuma longa</i>        | GU180436 |
| Monocotyledons | Zingiberaceae  | <i>Curcuma</i> | <i>Curcuma longa</i>        | JF730221 |
| Monocotyledons | Zingiberaceae  | <i>Curcuma</i> | <i>Curcuma longa</i>        | JF730222 |
| Monocotyledons | Zingiberaceae  | <i>Curcuma</i> | <i>Curcuma longa</i>        | JF730223 |
| Monocotyledons | Zingiberaceae  | <i>Curcuma</i> | <i>Curcuma longa</i>        | JF730224 |
| Monocotyledons | Zingiberaceae  | <i>Curcuma</i> | <i>Curcuma longa</i>        | JF730225 |
| Monocotyledons | Zingiberaceae  | <i>Curcuma</i> | <i>Curcuma longa</i>        | JF730226 |
| Monocotyledons | Zingiberaceae  | <i>Curcuma</i> | <i>Curcuma longa</i>        | JF730227 |
| Monocotyledons | Zingiberaceae  | <i>Curcuma</i> | <i>Curcuma longa</i>        | JF730228 |
| Monocotyledons | Zingiberaceae  | <i>Curcuma</i> | <i>Curcuma longa</i>        | JF730229 |
| Monocotyledons | Zingiberaceae  | <i>Curcuma</i> | <i>Curcuma longa</i>        | JF730230 |
| Monocotyledons | Zingiberaceae  | <i>Curcuma</i> | <i>Curcuma longa</i>        | JF730231 |
| Monocotyledons | Zingiberaceae  | <i>Curcuma</i> | <i>Curcuma longa</i>        | JF730232 |

|                |                |                   |                             |          |
|----------------|----------------|-------------------|-----------------------------|----------|
| Monocotyledons | Zingiberaceae  | <i>Curcuma</i>    | <i>Curcuma longa</i>        | JF730233 |
| Monocotyledons | Zingiberaceae  | <i>Curcuma</i>    | <i>Curcuma longa</i>        | JF730234 |
| Monocotyledons | Zingiberaceae  | <i>Curcuma</i>    | <i>Curcuma longa</i>        | JF730235 |
| Monocotyledons | Zingiberaceae  | <i>Curcuma</i>    | <i>Curcuma longa</i>        | JF730236 |
| Monocotyledons | Zingiberaceae  | <i>Curcuma</i>    | <i>Curcuma longa</i>        | JF730237 |
| Monocotyledons | Zingiberaceae  | <i>Curcuma</i>    | <i>Curcuma longa</i>        | JF730238 |
| Monocotyledons | Zingiberaceae  | <i>Curcuma</i>    | <i>Curcuma longa</i>        | JF730239 |
| Monocotyledons | Zingiberaceae  | <i>Curcuma</i>    | <i>Curcuma longa</i>        | JF730253 |
| Monocotyledons | Zingiberaceae  | <i>Curcuma</i>    | <i>Curcuma longa</i>        | JF730254 |
| Monocotyledons | Zingiberaceae  | <i>Curcuma</i>    | <i>Curcuma longa</i>        | JF730255 |
| Monocotyledons | Zingiberaceae  | <i>Curcuma</i>    | <i>Curcuma phaeocaulis</i>  | EU552524 |
| Monocotyledons | Zingiberaceae  | <i>Curcuma</i>    | <i>Curcuma phaeocaulis</i>  | JF730247 |
| Monocotyledons | Zingiberaceae  | <i>Curcuma</i>    | <i>Curcuma phaeocaulis</i>  | JF730248 |
| Monocotyledons | Zingiberaceae  | <i>Curcuma</i>    | <i>Curcuma phaeocaulis</i>  | JF730249 |
| Monocotyledons | Zingiberaceae  | <i>Curcuma</i>    | <i>Curcuma phaeocaulis</i>  | JF730256 |
| Monocotyledons | Zingiberaceae  | <i>Curcuma</i>    | <i>Curcuma phaeocaulis</i>  | JF730257 |
| Monocotyledons | Zingiberaceae  | <i>Curcuma</i>    | <i>Curcuma sichuanensis</i> | JF730240 |
| Monocotyledons | Zingiberaceae  | <i>Curcuma</i>    | <i>Curcuma sichuanensis</i> | JF730241 |
| Monocotyledons | Zingiberaceae  | <i>Curcuma</i>    | <i>Curcuma sichuanensis</i> | JF730242 |
| Monocotyledons | Zingiberaceae  | <i>Curcuma</i>    | <i>Curcuma sichuanensis</i> | JF730243 |
| Monocotyledons | Zingiberaceae  | <i>Curcuma</i>    | <i>Curcuma sichuanensis</i> | JF730244 |
| Monocotyledons | Zingiberaceae  | <i>Curcuma</i>    | <i>Curcuma sichuanensis</i> | JF730245 |
| Monocotyledons | Zingiberaceae  | <i>Curcuma</i>    | <i>Curcuma sichuanensis</i> | JF730246 |
| Monocotyledons | Zingiberaceae  | <i>Curcuma</i>    | <i>Curcuma wenyujin</i>     | EU552525 |
| Monocotyledons | Zingiberaceae  | <i>Curcuma</i>    | <i>Curcuma wenyujin</i>     | JF730252 |
| Monocotyledons | Zingiberaceae  | <i>Curcuma</i>    | <i>Curcuma zedoaria</i>     | FJ687417 |
| Monocotyledons | Zingiberaceae  | <i>Curcuma</i>    | <i>Curcuma zedoaria</i>     | GU180426 |
| Monocotyledons | Amaryllidaceae | <i>Lycoris</i>    | <i>Lycoris aurea</i>        | GQ923938 |
| Monocotyledons | Amaryllidaceae | <i>Lycoris</i>    | <i>Lycoris aurea</i>        | HM748822 |
| Monocotyledons | Stemonaceae    | <i>Stemona</i>    | <i>Stemona tuberosa</i>     | GQ434873 |
| Monocotyledons | Stemonaceae    | <i>Stemona</i>    | <i>Stemona tuberosa</i>     | GQ434874 |
| Monocotyledons | Stemonaceae    | <i>Stemona</i>    | <i>Stemona tuberosa</i>     | AB373199 |
| Monocotyledons | Zingiberaceae  | <i>Alpinia</i>    | <i>Alpinia calcarata</i>    | JN043820 |
| Monocotyledons | Zingiberaceae  | <i>Alpinia</i>    | <i>Alpinia calcarata</i>    | JN043821 |
| Monocotyledons | Zingiberaceae  | <i>Alpinia</i>    | <i>Alpinia calcarata</i>    | JN043822 |
| Monocotyledons | Zingiberaceae  | <i>Alpinia</i>    | <i>Alpinia calcarata</i>    | JN043823 |
| Monocotyledons | Zingiberaceae  | <i>Alpinia</i>    | <i>Alpinia carolinensis</i> | JN043824 |
| Monocotyledons | Zingiberaceae  | <i>Alpinia</i>    | <i>Alpinia carolinensis</i> | JN043825 |
| Monocotyledons | Zingiberaceae  | <i>Alpinia</i>    | <i>Alpinia elegans</i>      | JN043829 |
| Monocotyledons | Zingiberaceae  | <i>Alpinia</i>    | <i>Alpinia elegans</i>      | JN043830 |
| Monocotyledons | Zingiberaceae  | <i>Alpinia</i>    | <i>Alpinia foxworthyi</i>   | JN043835 |
| Monocotyledons | Zingiberaceae  | <i>Alpinia</i>    | <i>Alpinia foxworthyi</i>   | JN043836 |
| Monocotyledons | Zingiberaceae  | <i>Alpinia</i>    | <i>Alpinia foxworthyi</i>   | JN043837 |
| Monocotyledons | Zingiberaceae  | <i>Alpinia</i>    | <i>Alpinia officinarum</i>  | EU552529 |
| Monocotyledons | Zingiberaceae  | <i>Alpinia</i>    | <i>Alpinia officinarum</i>  | GU180427 |
| Monocotyledons | Zingiberaceae  | <i>Alpinia</i>    | <i>Alpinia officinarum</i>  | GU180428 |
| Monocotyledons | Zingiberaceae  | <i>Kaempferia</i> | <i>Kaempferia pulchra</i>   | GQ386025 |
| Monocotyledons | Zingiberaceae  | <i>Kaempferia</i> | <i>Kaempferia pulchra</i>   | GQ386026 |
| Monocotyledons | Zingiberaceae  | <i>Kaempferia</i> | <i>Kaempferia pulchra</i>   | GQ386027 |
| Monocotyledons | Zingiberaceae  | <i>Kaempferia</i> | <i>Kaempferia pulchra</i>   | GQ386028 |
| Monocotyledons | Amaryllidaceae | <i>Lycoris</i>    | <i>Lycoris albiflora</i>    | GQ923943 |
| Monocotyledons | Amaryllidaceae | <i>Lycoris</i>    | <i>Lycoris albiflora</i>    | HM748820 |
| Monocotyledons | Zingiberaceae  | <i>Alpinia</i>    | <i>Alpinia jianganfeng</i>  | JN043854 |

|                |                |                     |                                |          |
|----------------|----------------|---------------------|--------------------------------|----------|
| Monocotyledons | Zingiberaceae  | <i>Alpinia</i>      | <i>Alpinia jianganfeng</i>     | JN043855 |
| Monocotyledons | Amaryllidaceae | <i>Lycoris</i>      | <i>Lycoris radiata</i>         | GQ923942 |
| Monocotyledons | Amaryllidaceae | <i>Lycoris</i>      | <i>Lycoris radiata</i>         | HM748828 |
| Monocotyledons | Zingiberaceae  | <i>Kaempferia</i>   | <i>Kaempferia angustifolia</i> | GQ386041 |
| Monocotyledons | Zingiberaceae  | <i>Kaempferia</i>   | <i>Kaempferia angustifolia</i> | GQ386042 |
| Monocotyledons | Zingiberaceae  | <i>Boesenbergia</i> | <i>Boesenbergia longiflora</i> | DQ408311 |
| Monocotyledons | Zingiberaceae  | <i>Boesenbergia</i> | <i>Boesenbergia longiflora</i> | DQ408312 |
| Monocotyledons | Amaryllidaceae | <i>Lycoris</i>      | <i>Lycoris chinensis</i>       | GQ923949 |
| Monocotyledons | Amaryllidaceae | <i>Lycoris</i>      | <i>Lycoris chinensis</i>       | HM748827 |
| Monocotyledons | Amaryllidaceae | <i>Lycoris</i>      | <i>Lycoris longituba</i>       | GQ923944 |
| Monocotyledons | Amaryllidaceae | <i>Lycoris</i>      | <i>Lycoris longituba</i>       | HM748817 |
| Monocotyledons | Zingiberaceae  | <i>Alpinia</i>      | <i>Alpinia kwangsiensis</i>    | GU180422 |
| Monocotyledons | Zingiberaceae  | <i>Alpinia</i>      | <i>Alpinia kwangsiensis</i>    | JN043856 |
| Monocotyledons | Zingiberaceae  | <i>Alpinia</i>      | <i>Alpinia kwangsiensis</i>    | JN043857 |
| Monocotyledons | Amaryllidaceae | <i>Lycoris</i>      | <i>Lycoris anhuiensis</i>      | GQ923948 |
| Monocotyledons | Amaryllidaceae | <i>Lycoris</i>      | <i>Lycoris anhuiensis</i>      | HM748823 |
| Monocotyledons | Amaryllidaceae | <i>Lycoris</i>      | <i>Lycoris sprengeri</i>       | GQ923945 |
| Monocotyledons | Amaryllidaceae | <i>Lycoris</i>      | <i>Lycoris sprengeri</i>       | HM748815 |
| Monocotyledons | Amaryllidaceae | <i>Lycoris</i>      | <i>Lycoris rosea</i>           | GQ923947 |
| Monocotyledons | Amaryllidaceae | <i>Lycoris</i>      | <i>Lycoris rosea</i>           | HM748825 |
| Monocotyledons | Amaryllidaceae | <i>Lycoris</i>      | <i>Lycoris haywardii</i>       | GQ923950 |
| Monocotyledons | Amaryllidaceae | <i>Lycoris</i>      | <i>Lycoris haywardii</i>       | HM748816 |
| Monocotyledons | Amaryllidaceae | <i>Lycoris</i>      | <i>Lycoris incarnata</i>       | GQ923939 |
| Monocotyledons | Amaryllidaceae | <i>Lycoris</i>      | <i>Lycoris incarnata</i>       | HM748830 |
| Monocotyledons | Amaryllidaceae | <i>Lycoris</i>      | <i>Lycoris straminea</i>       | GQ923946 |
| Monocotyledons | Amaryllidaceae | <i>Lycoris</i>      | <i>Lycoris straminea</i>       | HM748826 |
| Monocotyledons | Zingiberaceae  | <i>Boesenbergia</i> | <i>Boesenbergia curtisii</i>   | DQ408309 |
| Monocotyledons | Zingiberaceae  | <i>Boesenbergia</i> | <i>Boesenbergia curtisii</i>   | DQ408310 |
| Monocotyledons | Zingiberaceae  | <i>Boesenbergia</i> | <i>Boesenbergia longipes</i>   | DQ408313 |
| Monocotyledons | Zingiberaceae  | <i>Boesenbergia</i> | <i>Boesenbergia longipes</i>   | DQ408314 |
| Monocotyledons | Zingiberaceae  | <i>Kaempferia</i>   | <i>Kaempferia candida</i>      | GQ386003 |
| Monocotyledons | Zingiberaceae  | <i>Kaempferia</i>   | <i>Kaempferia candida</i>      | GQ386004 |
| Monocotyledons | Zingiberaceae  | <i>Kaempferia</i>   | <i>Kaempferia marginata</i>    | GQ385976 |
| Monocotyledons | Zingiberaceae  | <i>Kaempferia</i>   | <i>Kaempferia marginata</i>    | GQ385981 |
| Monocotyledons | Zingiberaceae  | <i>Kaempferia</i>   | <i>Kaempferia marginata</i>    | GQ385982 |
| Monocotyledons | Zingiberaceae  | <i>Kaempferia</i>   | <i>Kaempferia marginata</i>    | GQ385983 |
| Monocotyledons | Zingiberaceae  | <i>Kaempferia</i>   | <i>Kaempferia marginata</i>    | GQ385984 |
| Monocotyledons | Zingiberaceae  | <i>Alpinia</i>      | <i>Alpinia oblongifolia</i>    | JN043860 |
| Monocotyledons | Zingiberaceae  | <i>Alpinia</i>      | <i>Alpinia oblongifolia</i>    | JN043861 |
| Monocotyledons | Zingiberaceae  | <i>Alpinia</i>      | <i>Alpinia oblongifolia</i>    | JN043862 |
| Monocotyledons | Zingiberaceae  | <i>Curcuma</i>      | <i>Curcuma cochinchinensis</i> | GQ248280 |
| Monocotyledons | Zingiberaceae  | <i>Curcuma</i>      | <i>Curcuma cochinchinensis</i> | EF590684 |
| Monocotyledons | Poaceae        | <i>Pappostipa</i>   | <i>Pappostipa vaginata</i>     | EU489283 |
| Monocotyledons | Poaceae        | <i>Pappostipa</i>   | <i>Pappostipa vaginata</i>     | EU489284 |
| Monocotyledons | Poaceae        | <i>Pappostipa</i>   | <i>Pappostipa vaginata</i>     | EU204749 |
| Monocotyledons | Poaceae        | <i>Pappostipa</i>   | <i>Pappostipa vaginata</i>     | EU204750 |
| Monocotyledons | Zingiberaceae  | <i>Curcuma</i>      | <i>Curcuma attenuata</i>       | GQ248279 |
| Monocotyledons | Zingiberaceae  | <i>Curcuma</i>      | <i>Curcuma attenuata</i>       | EF590683 |
| Monocotyledons | Poaceae        | <i>Pappostipa</i>   | <i>Pappostipa chrysophylla</i> | EU489257 |
| Monocotyledons | Poaceae        | <i>Pappostipa</i>   | <i>Pappostipa chrysophylla</i> | EU489258 |
| Monocotyledons | Poaceae        | <i>Pappostipa</i>   | <i>Pappostipa chrysophylla</i> | EU489259 |
| Monocotyledons | Poaceae        | <i>Pappostipa</i>   | <i>Pappostipa chrysophylla</i> | EU204729 |
| Monocotyledons | Poaceae        | <i>Pappostipa</i>   | <i>Pappostipa chrysophylla</i> | EU204730 |







|                |               |                      |                                      |          |
|----------------|---------------|----------------------|--------------------------------------|----------|
| Monocotyledons | Hyacinthaceae | <i>Hyacinthoides</i> | <i>Hyacinthoides ciliolata</i>       | FJ423299 |
| Monocotyledons | Hyacinthaceae | <i>Hyacinthoides</i> | <i>Hyacinthoides ciliolata</i>       | FJ423300 |
| Monocotyledons | Hyacinthaceae | <i>Hyacinthoides</i> | <i>Hyacinthoides ciliolata</i>       | FJ423301 |
| Monocotyledons | Hyacinthaceae | <i>Hyacinthoides</i> | <i>Hyacinthoides flahaultiana</i>    | FJ423313 |
| Monocotyledons | Hyacinthaceae | <i>Hyacinthoides</i> | <i>Hyacinthoides flahaultiana</i>    | FJ423314 |
| Monocotyledons | Hyacinthaceae | <i>Hyacinthoides</i> | <i>Hyacinthoides flahaultiana</i>    | FJ423315 |
| Monocotyledons | Hyacinthaceae | <i>Hyacinthoides</i> | <i>Hyacinthoides mauritanica</i>     | FJ423309 |
| Monocotyledons | Hyacinthaceae | <i>Hyacinthoides</i> | <i>Hyacinthoides mauritanica</i>     | FJ423310 |
| Monocotyledons | Hyacinthaceae | <i>Hyacinthoides</i> | <i>Hyacinthoides mauritanica</i>     | FJ423311 |
| Monocotyledons | Hyacinthaceae | <i>Hyacinthoides</i> | <i>Hyacinthoides mauritanica</i>     | FJ423312 |
| Monocotyledons | Hyacinthaceae | <i>Hyacinthoides</i> | <i>Hyacinthoides paivae</i>          | FJ423346 |
| Monocotyledons | Hyacinthaceae | <i>Hyacinthoides</i> | <i>Hyacinthoides paivae</i>          | FJ423347 |
| Monocotyledons | Zingiberaceae | <i>Kaempferia</i>    | <i>Kaempferia sp. JT-2010a</i>       | GQ385994 |
| Monocotyledons | Zingiberaceae | <i>Kaempferia</i>    | <i>Kaempferia sp. JT-2010a</i>       | GQ385995 |
| Monocotyledons | Zingiberaceae | <i>Kaempferia</i>    | <i>Kaempferia sp. JT-2010b</i>       | GQ385998 |
| Monocotyledons | Zingiberaceae | <i>Kaempferia</i>    | <i>Kaempferia sp. JT-2010b</i>       | GQ385999 |
| Monocotyledons | Zingiberaceae | <i>Kaempferia</i>    | <i>Kaempferia fallax</i>             | GQ386018 |
| Monocotyledons | Zingiberaceae | <i>Kaempferia</i>    | <i>Kaempferia fallax</i>             | GQ386019 |
| Monocotyledons | Zingiberaceae | <i>Kaempferia</i>    | <i>Kaempferia fallax</i>             | GQ386020 |
| Monocotyledons | Zingiberaceae | <i>Kaempferia</i>    | <i>Kaempferia fallax</i>             | GQ386021 |
| Monocotyledons | Zingiberaceae | <i>Kaempferia</i>    | <i>Kaempferia filifolia</i>          | GQ386022 |
| Monocotyledons | Zingiberaceae | <i>Kaempferia</i>    | <i>Kaempferia filifolia</i>          | GQ386023 |
| Monocotyledons | Zingiberaceae | <i>Kaempferia</i>    | <i>Kaempferia filifolia</i>          | GQ386024 |
| Monocotyledons | Zingiberaceae | <i>Kaempferia</i>    | <i>Kaempferia laotica</i>            | GQ385985 |
| Monocotyledons | Zingiberaceae | <i>Kaempferia</i>    | <i>Kaempferia laotica</i>            | GQ385987 |
| Monocotyledons | Zingiberaceae | <i>Kaempferia</i>    | <i>Kaempferia larsenii</i>           | GQ385989 |
| Monocotyledons | Zingiberaceae | <i>Kaempferia</i>    | <i>Kaempferia larsenii</i>           | GQ385990 |
| Monocotyledons | Zingiberaceae | <i>Kaempferia</i>    | <i>Kaempferia larsenii</i>           | GQ385991 |
| Monocotyledons | Zingiberaceae | <i>Kaempferia</i>    | <i>Kaempferia larsenii</i>           | GQ385992 |
| Monocotyledons | Zingiberaceae | <i>Kaempferia</i>    | <i>Kaempferia larsenii</i>           | GQ385993 |
| Monocotyledons | Zingiberaceae | <i>Kaempferia</i>    | <i>Kaempferia sp. JT-2010c</i>       | GQ386043 |
| Monocotyledons | Zingiberaceae | <i>Kaempferia</i>    | <i>Kaempferia sp. JT-2010c</i>       | GQ386044 |
| Monocotyledons | Zingiberaceae | <i>Kaempferia</i>    | <i>Kaempferia sp. JT-2010c</i>       | GQ386045 |
| Monocotyledons | Zingiberaceae | <i>Kaempferia</i>    | <i>Kaempferia sp. JT-2010c</i>       | GQ386046 |
| Monocotyledons | Zingiberaceae | <i>Kaempferia</i>    | <i>Kaempferia sp. JT-2010d</i>       | GQ385996 |
| Monocotyledons | Zingiberaceae | <i>Kaempferia</i>    | <i>Kaempferia sp. JT-2010d</i>       | GQ385997 |
| Monocotyledons | Zingiberaceae | <i>Kaempferia</i>    | <i>Kaempferia siamensis</i>          | GQ386039 |
| Monocotyledons | Zingiberaceae | <i>Kaempferia</i>    | <i>Kaempferia siamensis</i>          | GQ386040 |
| Monocotyledons | Zingiberaceae | <i>Kaempferia</i>    | <i>Kaempferia sp. nov. 1 JT-2010</i> | GQ386001 |
| Monocotyledons | Zingiberaceae | <i>Kaempferia</i>    | <i>Kaempferia sp. nov. 1 JT-2010</i> | GQ386002 |
| Monocotyledons | Poaceae       | <i>Digitaria</i>     | <i>Digitaria macroblephara</i>       | HQ876950 |
| Monocotyledons | Poaceae       | <i>Digitaria</i>     | <i>Digitaria macroblephara</i>       | HQ876951 |
| Monocotyledons | Poaceae       | <i>Digitaria</i>     | <i>Digitaria macroblephara</i>       | HQ876952 |
| Monocotyledons | Poaceae       | <i>Digitaria</i>     | <i>Digitaria abyssinica</i>          | HQ876953 |
| Monocotyledons | Poaceae       | <i>Digitaria</i>     | <i>Digitaria abyssinica</i>          | HQ876954 |
| Monocotyledons | Poaceae       | <i>Digitaria</i>     | <i>Digitaria ternata</i>             | HQ876955 |
| Monocotyledons | Poaceae       | <i>Digitaria</i>     | <i>Digitaria ternata</i>             | HQ876956 |
| Monocotyledons | Zingiberaceae | <i>Alpinia</i>       | <i>Alpinia emaculata</i>             | JN043831 |
| Monocotyledons | Zingiberaceae | <i>Alpinia</i>       | <i>Alpinia emaculata</i>             | JN043832 |
| Monocotyledons | Zingiberaceae | <i>Alpinia</i>       | <i>Alpinia platytilus</i>            | JN043867 |
| Monocotyledons | Zingiberaceae | <i>Alpinia</i>       | <i>Alpinia platytilus</i>            | JN043868 |
| Monocotyledons | Zingiberaceae | <i>Alpinia</i>       | <i>Alpinia platytilus</i>            | JN043869 |
| Monocotyledons | Zingiberaceae | <i>Alpinia</i>       | <i>Alpinia platytilus</i>            | JN043870 |

|                |               |                |                             |          |
|----------------|---------------|----------------|-----------------------------|----------|
| Monocotyledons | Zingiberaceae | <i>Alpinia</i> | <i>Alpinia graminifolia</i> | JN043844 |
| Monocotyledons | Zingiberaceae | <i>Alpinia</i> | <i>Alpinia graminifolia</i> | JN043845 |
