# Supplementary material for: Utility of the trnH–psbA Intergenic Spacer Region and Its Combinations as Plant DNA Barcodes: A Meta-Analysis
Source: PubMed Central journal article supplement (PMC3498263; doi:10.1371/journal.pone.0048833), 2012-11-14
Supplement: pone.0048833.s002.pdf [file pone.0048833.s002.pdf]

**Table S2.** List of species with inversions in their sequences.

| <b>Taxonomy group</b> | <b>Family</b>   | <b>Genus</b>       | <b>Species</b>                 | <b>GenBank accession no.</b> |
|-----------------------|-----------------|--------------------|--------------------------------|------------------------------|
| Eudicotyledons        | Paeoniaceae     | <i>Paeonia</i>     | <i>Paeonia anomala</i>         | DQ313731                     |
| Eudicotyledons        | Paeoniaceae     | <i>Paeonia</i>     | <i>Paeonia anomala</i>         | DQ313732                     |
| Eudicotyledons        | Paeoniaceae     | <i>Paeonia</i>     | <i>Paeonia anomala</i>         | DQ313733                     |
| Eudicotyledons        | Paeoniaceae     | <i>Paeonia</i>     | <i>Paeonia anomala</i>         | DQ313734                     |
| Eudicotyledons        | Paeoniaceae     | <i>Paeonia</i>     | <i>Paeonia anomala</i>         | DQ313735                     |
| Eudicotyledons        | Paeoniaceae     | <i>Paeonia</i>     | <i>Paeonia anomala</i>         | GQ435203                     |
| Eudicotyledons        | Paeoniaceae     | <i>Paeonia</i>     | <i>Paeonia anomala</i>         | GQ435204                     |
| Eudicotyledons        | Paeoniaceae     | <i>Paeonia</i>     | <i>Paeonia jishanensis</i>     | GU367369                     |
| Eudicotyledons        | Paeoniaceae     | <i>Paeonia</i>     | <i>Paeonia jishanensis</i>     | GU367370                     |
| Eudicotyledons        | Vitaceae        | <i>Ampelopsis</i>  | <i>Ampelopsis megalophylla</i> | JQ182521                     |
| Eudicotyledons        | Vitaceae        | <i>Ampelopsis</i>  | <i>Ampelopsis megalophylla</i> | HQ656484                     |
| Eudicotyledons        | Melastomataceae | <i>Melastoma</i>   | <i>Melastoma dodecandrum</i>   | GQ435424                     |
| Eudicotyledons        | Melastomataceae | <i>Melastoma</i>   | <i>Melastoma dodecandrum</i>   | JN040997                     |
| Eudicotyledons        | Vitaceae        | <i>Cayratia</i>    | <i>Cayratia japonica</i>       | JQ182535                     |
| Eudicotyledons        | Vitaceae        | <i>Cayratia</i>    | <i>Cayratia japonica</i>       | HM585664                     |
| Eudicotyledons        | Vitaceae        | <i>Cayratia</i>    | <i>Cayratia japonica</i>       | JF437078                     |
| Eudicotyledons        | Vitaceae        | <i>Cayratia</i>    | <i>Cayratia japonica</i>       | JF437082                     |
| Eudicotyledons        | Vitaceae        | <i>Cayratia</i>    | <i>Cayratia japonica</i>       | JF437083                     |
| Eudicotyledons        | Vitaceae        | <i>Cayratia</i>    | <i>Cayratia japonica</i>       | JF437084                     |
| Eudicotyledons        | Fagaceae        | <i>Castanopsis</i> | <i>Castanopsis fissa</i>       | HQ415580                     |
| Eudicotyledons        | Fagaceae        | <i>Castanopsis</i> | <i>Castanopsis fissa</i>       | JN044211                     |
| Eudicotyledons        | Fagaceae        | <i>Castanopsis</i> | <i>Castanopsis fissa</i>       | JN044212                     |
| Eudicotyledons        | Fagaceae        | <i>Castanopsis</i> | <i>Castanopsis fissa</i>       | JN044213                     |
| Eudicotyledons        | Fabaceae        | <i>Inga</i>        | <i>Inga punctata</i>           | GQ118882                     |
| Eudicotyledons        | Fabaceae        | <i>Inga</i>        | <i>Inga punctata</i>           | GQ982259                     |
| Eudicotyledons        | Fabaceae        | <i>Inga</i>        | <i>Inga punctata</i>           | AM922040                     |
| Eudicotyledons        | Fabaceae        | <i>Inga</i>        | <i>Inga punctata</i>           | AM922041                     |
| Eudicotyledons        | Fabaceae        | <i>Inga</i>        | <i>Inga punctata</i>           | AM922042                     |
| Eudicotyledons        | Fabaceae        | <i>Inga</i>        | <i>Inga punctata</i>           | AM922043                     |
| Eudicotyledons        | Fabaceae        | <i>Inga</i>        | <i>Inga punctata</i>           | AM922054                     |
| Eudicotyledons        | Plantaginaceae  | <i>Synthyris</i>   | <i>Synthyris dissecta</i>      | EU232348                     |
| Eudicotyledons        | Plantaginaceae  | <i>Synthyris</i>   | <i>Synthyris dissecta</i>      | EU232349                     |
| Eudicotyledons        | Plantaginaceae  | <i>Synthyris</i>   | <i>Synthyris dissecta</i>      | EU232350                     |
| Eudicotyledons        | Plantaginaceae  | <i>Synthyris</i>   | <i>Synthyris dissecta</i>      | EU232351                     |
| Eudicotyledons        | Plantaginaceae  | <i>Synthyris</i>   | <i>Synthyris dissecta</i>      | EU232352                     |
| Eudicotyledons        | Plantaginaceae  | <i>Synthyris</i>   | <i>Synthyris dissecta</i>      | EU232353                     |
| Eudicotyledons        | Plantaginaceae  | <i>Synthyris</i>   | <i>Synthyris dissecta</i>      | EU232354                     |
| Eudicotyledons        | Plantaginaceae  | <i>Synthyris</i>   | <i>Synthyris dissecta</i>      | EU232355                     |
| Eudicotyledons        | Plantaginaceae  | <i>Synthyris</i>   | <i>Synthyris dissecta</i>      | EU232356                     |
| Eudicotyledons        | Plantaginaceae  | <i>Synthyris</i>   | <i>Synthyris dissecta</i>      | EU232357                     |
| Eudicotyledons        | Plantaginaceae  | <i>Synthyris</i>   | <i>Synthyris dissecta</i>      | EU232358                     |
| Eudicotyledons        | Plantaginaceae  | <i>Synthyris</i>   | <i>Synthyris dissecta</i>      | EU232359                     |
| Eudicotyledons        | Plantaginaceae  | <i>Synthyris</i>   | <i>Synthyris dissecta</i>      | EU232360                     |
| Eudicotyledons        | Plantaginaceae  | <i>Synthyris</i>   | <i>Synthyris dissecta</i>      | EU232361                     |
| Eudicotyledons        | Plantaginaceae  | <i>Synthyris</i>   | <i>Synthyris dissecta</i>      | EU232362                     |
| Eudicotyledons        | Plantaginaceae  | <i>Synthyris</i>   | <i>Synthyris dissecta</i>      | EU232363                     |
| Eudicotyledons        | Plantaginaceae  | <i>Synthyris</i>   | <i>Synthyris dissecta</i>      | EU232364                     |
| Eudicotyledons        | Plantaginaceae  | <i>Synthyris</i>   | <i>Synthyris dissecta</i>      | EU232365                     |
| Eudicotyledons        | Plantaginaceae  | <i>Synthyris</i>   | <i>Synthyris dissecta</i>      | EU232366                     |
| Eudicotyledons        | Plantaginaceae  | <i>Synthyris</i>   | <i>Synthyris dissecta</i>      | EU232367                     |
| Eudicotyledons        | Plantaginaceae  | <i>Synthyris</i>   | <i>Synthyris dissecta</i>      | EU232368                     |







|                |              |                    |                                   |          |
|----------------|--------------|--------------------|-----------------------------------|----------|
| Eudicotyledons | Vitaceae     | <i>Ampelopsis</i>  | <i>Ampelopsis cantoniensis</i>    | JF437062 |
| Eudicotyledons | Malvaceae    | <i>Althaea</i>     | <i>Althaea hirsuta</i>            | EF419620 |
| Eudicotyledons | Malvaceae    | <i>Althaea</i>     | <i>Althaea hirsuta</i>            | EF419621 |
| Eudicotyledons | Malvaceae    | <i>Althaea</i>     | <i>Althaea hirsuta</i>            | EF419622 |
| Eudicotyledons | Malvaceae    | <i>Althaea</i>     | <i>Althaea hirsuta</i>            | EF419623 |
| Eudicotyledons | Malvaceae    | <i>Althaea</i>     | <i>Althaea hirsuta</i>            | EF419624 |
| Eudicotyledons | Malvaceae    | <i>Althaea</i>     | <i>Althaea hirsuta</i>            | EF419625 |
| Eudicotyledons | Polygonaceae | <i>Bistorta</i>    | <i>Bistorta macrophylla</i>       | JN046427 |
| Eudicotyledons | Polygonaceae | <i>Bistorta</i>    | <i>Bistorta macrophylla</i>       | JN046428 |
| Eudicotyledons | Polygonaceae | <i>Bistorta</i>    | <i>Bistorta macrophylla</i>       | JN046429 |
| Eudicotyledons | Polygonaceae | <i>Bistorta</i>    | <i>Bistorta macrophylla</i>       | JN046430 |
| Eudicotyledons | Polygonaceae | <i>Bistorta</i>    | <i>Bistorta macrophylla</i>       | JN046431 |
| Eudicotyledons | Polygonaceae | <i>Bistorta</i>    | <i>Bistorta macrophylla</i>       | JN046432 |
| Eudicotyledons | Polygonaceae | <i>Bistorta</i>    | <i>Bistorta macrophylla</i>       | JN046433 |
| Eudicotyledons | Polygonaceae | <i>Bistorta</i>    | <i>Bistorta macrophylla</i>       | JN046434 |
| Eudicotyledons | Rosaceae     | <i>Cliffortia</i>  | <i>Cliffortia linearifolia</i>    | EU937691 |
| Eudicotyledons | Rosaceae     | <i>Cliffortia</i>  | <i>Cliffortia linearifolia</i>    | EU937692 |
| Eudicotyledons | Rosaceae     | <i>Cliffortia</i>  | <i>Cliffortia marginata</i>       | EU937668 |
| Eudicotyledons | Rosaceae     | <i>Cliffortia</i>  | <i>Cliffortia marginata</i>       | EU937669 |
| Eudicotyledons | Oleaceae     | <i>Ligustrum</i>   | <i>Ligustrum strongylophyllum</i> | JF830267 |
| Eudicotyledons | Oleaceae     | <i>Ligustrum</i>   | <i>Ligustrum strongylophyllum</i> | JF830268 |
| Eudicotyledons | Oleaceae     | <i>Ligustrum</i>   | <i>Ligustrum strongylophyllum</i> | JF830269 |
| Eudicotyledons | Oleaceae     | <i>Ligustrum</i>   | <i>Ligustrum strongylophyllum</i> | JN045244 |
| Eudicotyledons | Oleaceae     | <i>Ligustrum</i>   | <i>Ligustrum strongylophyllum</i> | JN045245 |
| Eudicotyledons | Rosaceae     | <i>Pyracantha</i>  | <i>Pyracantha crenulata</i>       | JN046706 |
| Eudicotyledons | Rosaceae     | <i>Pyracantha</i>  | <i>Pyracantha crenulata</i>       | JN046707 |
| Eudicotyledons | Rosaceae     | <i>Pyracantha</i>  | <i>Pyracantha crenulata</i>       | JN046708 |
| Eudicotyledons | Fagaceae     | <i>Castanopsis</i> | <i>Castanopsis lamontii</i>       | JN044214 |
| Eudicotyledons | Fagaceae     | <i>Castanopsis</i> | <i>Castanopsis lamontii</i>       | JN044215 |
| Eudicotyledons | Fagaceae     | <i>Castanopsis</i> | <i>Castanopsis lamontii</i>       | JN044216 |
| Eudicotyledons | Fagaceae     | <i>Castanopsis</i> | <i>Castanopsis lamontii</i>       | JN044217 |
| Eudicotyledons | Fagaceae     | <i>Castanopsis</i> | <i>Castanopsis lamontii</i>       | JN044218 |
| Eudicotyledons | Fabaceae     | <i>Schotia</i>     | <i>Schotia brachypetala</i>       | GQ405092 |
| Eudicotyledons | Fabaceae     | <i>Schotia</i>     | <i>Schotia brachypetala</i>       | GQ405098 |
| Eudicotyledons | Fabaceae     | <i>Schotia</i>     | <i>Schotia brachypetala</i>       | GQ405109 |
| Eudicotyledons | Fabaceae     | <i>Schotia</i>     | <i>Schotia brachypetala</i>       | GQ405121 |
| Eudicotyledons | Fabaceae     | <i>Schotia</i>     | <i>Schotia brachypetala</i>       | GQ405131 |
| Eudicotyledons | Fabaceae     | <i>Schotia</i>     | <i>Schotia brachypetala</i>       | GQ405132 |
| Eudicotyledons | Lamiaceae    | <i>Mentha</i>      | <i>Mentha spicata</i>             | DQ667354 |
| Eudicotyledons | Lamiaceae    | <i>Mentha</i>      | <i>Mentha spicata</i>             | EU585744 |
| Eudicotyledons | Lamiaceae    | <i>Mentha</i>      | <i>Mentha spicata</i>             | EU627573 |
| Eudicotyledons | Lamiaceae    | <i>Mentha</i>      | <i>Mentha spicata</i>             | EU627578 |
| Eudicotyledons | Lamiaceae    | <i>Mentha</i>      | <i>Mentha spicata</i>             | FR726101 |
| Eudicotyledons | Lamiaceae    | <i>Mentha</i>      | <i>Mentha spicata</i>             | FR726102 |
| Eudicotyledons | Lamiaceae    | <i>Mentha</i>      | <i>Mentha spicata</i>             | FJ513095 |
| Eudicotyledons | Lamiaceae    | <i>Mentha</i>      | <i>Mentha spicata</i>             | AY643666 |
| Eudicotyledons | Lamiaceae    | <i>Mentha</i>      | <i>Mentha spicata</i>             | AY643667 |
| Eudicotyledons | Lamiaceae    | <i>Mentha</i>      | <i>Mentha spicata</i>             | AY643668 |
| Eudicotyledons | Lamiaceae    | <i>Mentha</i>      | <i>Mentha spicata</i>             | AY643669 |
| Eudicotyledons | Lamiaceae    | <i>Mentha</i>      | <i>Mentha spicata</i>             | AY643670 |
| Eudicotyledons | Lamiaceae    | <i>Mentha</i>      | <i>Mentha spicata</i>             | AY643671 |
| Eudicotyledons | Lamiaceae    | <i>Mentha</i>      | <i>Mentha spicata</i>             | AY643672 |
| Eudicotyledons | Lamiaceae    | <i>Mentha</i>      | <i>Mentha spicata</i>             | AY643673 |

|                |              |                |                          |          |
|----------------|--------------|----------------|--------------------------|----------|
| Eudicotyledons | Lamiaceae    | <i>Mentha</i>  | <i>Mentha spicata</i>    | AY643674 |
| Eudicotyledons | Lamiaceae    | <i>Mentha</i>  | <i>Mentha spicata</i>    | AY643675 |
| Eudicotyledons | Lamiaceae    | <i>Mentha</i>  | <i>Mentha spicata</i>    | AY643676 |
| Eudicotyledons | Lamiaceae    | <i>Mentha</i>  | <i>Mentha spicata</i>    | AY643677 |
| Eudicotyledons | Lamiaceae    | <i>Mentha</i>  | <i>Mentha spicata</i>    | AY643678 |
| Eudicotyledons | Lamiaceae    | <i>Mentha</i>  | <i>Mentha spicata</i>    | HQ902826 |
| Eudicotyledons | Lamiaceae    | <i>Mentha</i>  | <i>Mentha spicata</i>    | HQ902827 |
| Eudicotyledons | Lamiaceae    | <i>Mentha</i>  | <i>Mentha spicata</i>    | HQ902854 |
| Eudicotyledons | Lamiaceae    | <i>Mentha</i>  | <i>Mentha spicata</i>    | HQ902865 |
| Eudicotyledons | Rosaceae     | <i>Rubus</i>   | <i>Rubus idaeus</i>      | EU750527 |
| Eudicotyledons | Rosaceae     | <i>Rubus</i>   | <i>Rubus idaeus</i>      | EU750528 |
| Eudicotyledons | Rosaceae     | <i>Rubus</i>   | <i>Rubus idaeus</i>      | EU750529 |
| Eudicotyledons | Rosaceae     | <i>Rubus</i>   | <i>Rubus idaeus</i>      | EU750530 |
| Eudicotyledons | Rosaceae     | <i>Rubus</i>   | <i>Rubus idaeus</i>      | EU750531 |
| Eudicotyledons | Papaveraceae | <i>Papaver</i> | <i>Papaver rhoeas</i>    | GQ248360 |
| Eudicotyledons | Papaveraceae | <i>Papaver</i> | <i>Papaver rhoeas</i>    | JN584665 |
| Eudicotyledons | Papaveraceae | <i>Papaver</i> | <i>Papaver rhoeas</i>    | EF590721 |
| Eudicotyledons | Lamiaceae    | <i>Mentha</i>  | <i>Mentha x piperita</i> | FR726096 |
| Eudicotyledons | Lamiaceae    | <i>Mentha</i>  | <i>Mentha x piperita</i> | FR726097 |
| Eudicotyledons | Lamiaceae    | <i>Mentha</i>  | <i>Mentha x piperita</i> | FR726098 |
| Eudicotyledons | Lamiaceae    | <i>Mentha</i>  | <i>Mentha x piperita</i> | AY643698 |
| Eudicotyledons | Lamiaceae    | <i>Mentha</i>  | <i>Mentha x piperita</i> | AY643699 |
| Eudicotyledons | Lamiaceae    | <i>Mentha</i>  | <i>Mentha x piperita</i> | AY643700 |
| Eudicotyledons | Lamiaceae    | <i>Mentha</i>  | <i>Mentha x piperita</i> | AY643701 |
| Eudicotyledons | Lamiaceae    | <i>Mentha</i>  | <i>Mentha x piperita</i> | AY643702 |
| Eudicotyledons | Lamiaceae    | <i>Mentha</i>  | <i>Mentha x piperita</i> | AY643703 |
| Eudicotyledons | Lamiaceae    | <i>Mentha</i>  | <i>Mentha x piperita</i> | AY643704 |
| Eudicotyledons | Lamiaceae    | <i>Mentha</i>  | <i>Mentha x piperita</i> | AY643705 |
| Eudicotyledons | Lamiaceae    | <i>Mentha</i>  | <i>Mentha x piperita</i> | AY643706 |
| Eudicotyledons | Lamiaceae    | <i>Mentha</i>  | <i>Mentha x piperita</i> | AY643707 |
| Eudicotyledons | Rutaceae     | <i>Citrus</i>  | <i>Citrus x paradisi</i> | JN315366 |
| Eudicotyledons | Rutaceae     | <i>Citrus</i>  | <i>Citrus x paradisi</i> | JN315367 |
| Eudicotyledons | Rutaceae     | <i>Citrus</i>  | <i>Citrus x paradisi</i> | HM446909 |
| Eudicotyledons | Lamiaceae    | <i>Mentha</i>  | <i>Mentha longifolia</i> | AY643679 |
| Eudicotyledons | Lamiaceae    | <i>Mentha</i>  | <i>Mentha longifolia</i> | AY643680 |
| Eudicotyledons | Lamiaceae    | <i>Mentha</i>  | <i>Mentha longifolia</i> | AY643681 |
| Eudicotyledons | Lamiaceae    | <i>Mentha</i>  | <i>Mentha longifolia</i> | AY643682 |
| Eudicotyledons | Lamiaceae    | <i>Mentha</i>  | <i>Mentha longifolia</i> | AY643683 |
| Eudicotyledons | Lamiaceae    | <i>Mentha</i>  | <i>Mentha longifolia</i> | AY643684 |
| Eudicotyledons | Lamiaceae    | <i>Mentha</i>  | <i>Mentha longifolia</i> | AY643685 |
| Eudicotyledons | Lamiaceae    | <i>Mentha</i>  | <i>Mentha longifolia</i> | AY643686 |
| Eudicotyledons | Lamiaceae    | <i>Mentha</i>  | <i>Mentha longifolia</i> | HQ902825 |
| Eudicotyledons | Lamiaceae    | <i>Mentha</i>  | <i>Mentha suaveolens</i> | AY643687 |
| Eudicotyledons | Lamiaceae    | <i>Mentha</i>  | <i>Mentha suaveolens</i> | AY643688 |
| Eudicotyledons | Lamiaceae    | <i>Mentha</i>  | <i>Mentha suaveolens</i> | AY643689 |
| Eudicotyledons | Lamiaceae    | <i>Mentha</i>  | <i>Mentha suaveolens</i> | AY643690 |
| Eudicotyledons | Lamiaceae    | <i>Mentha</i>  | <i>Mentha suaveolens</i> | AY643691 |
| Eudicotyledons | Lamiaceae    | <i>Mentha</i>  | <i>Mentha suaveolens</i> | AY643692 |
| Eudicotyledons | Lamiaceae    | <i>Mentha</i>  | <i>Mentha suaveolens</i> | AY643693 |
| Eudicotyledons | Lamiaceae    | <i>Mentha</i>  | <i>Mentha suaveolens</i> | AY643694 |
| Eudicotyledons | Lamiaceae    | <i>Mentha</i>  | <i>Mentha suaveolens</i> | AY643695 |
| Eudicotyledons | Lamiaceae    | <i>Mentha</i>  | <i>Mentha suaveolens</i> | AY643696 |
| Eudicotyledons | Lamiaceae    | <i>Mentha</i>  | <i>Mentha suaveolens</i> | AY643697 |

|                |                |                  |                            |          |
|----------------|----------------|------------------|----------------------------|----------|
| Eudicotyledons | Lamiaceae      | <i>Mentha</i>    | <i>Mentha suaveolens</i>   | HQ902829 |
| Eudicotyledons | Lamiaceae      | <i>Mentha</i>    | <i>Mentha suaveolens</i>   | HQ902855 |
| Eudicotyledons | Lamiaceae      | <i>Salvia</i>    | <i>Salvia officinalis</i>  | JQ339263 |
| Eudicotyledons | Lamiaceae      | <i>Salvia</i>    | <i>Salvia officinalis</i>  | DQ667342 |
| Eudicotyledons | Lamiaceae      | <i>Salvia</i>    | <i>Salvia officinalis</i>  | FR726139 |
| Eudicotyledons | Lamiaceae      | <i>Salvia</i>    | <i>Salvia officinalis</i>  | FR726140 |
| Eudicotyledons | Lamiaceae      | <i>Salvia</i>    | <i>Salvia officinalis</i>  | FR726141 |
| Eudicotyledons | Lamiaceae      | <i>Salvia</i>    | <i>Salvia officinalis</i>  | FJ513122 |
| Eudicotyledons | Gentianaceae   | <i>Gentiana</i>  | <i>Gentiana algida</i>     | HM460868 |
| Eudicotyledons | Gentianaceae   | <i>Gentiana</i>  | <i>Gentiana algida</i>     | HM460869 |
| Eudicotyledons | Gentianaceae   | <i>Gentiana</i>  | <i>Gentiana algida</i>     | HM460870 |
| Eudicotyledons | Caprifoliaceae | <i>Valeriana</i> | <i>Valeriana jatamansi</i> | GU477680 |
| Eudicotyledons | Caprifoliaceae | <i>Valeriana</i> | <i>Valeriana jatamansi</i> | GU477681 |
| Eudicotyledons | Caprifoliaceae | <i>Valeriana</i> | <i>Valeriana jatamansi</i> | GU477682 |
| Eudicotyledons | Caprifoliaceae | <i>Valeriana</i> | <i>Valeriana jatamansi</i> | GU477683 |
| Eudicotyledons | Caprifoliaceae | <i>Valeriana</i> | <i>Valeriana jatamansi</i> | GU477684 |
| Eudicotyledons | Caprifoliaceae | <i>Valeriana</i> | <i>Valeriana jatamansi</i> | GU477685 |
| Eudicotyledons | Caprifoliaceae | <i>Valeriana</i> | <i>Valeriana jatamansi</i> | GU477686 |
| Eudicotyledons | Caprifoliaceae | <i>Valeriana</i> | <i>Valeriana jatamansi</i> | GU477687 |
| Eudicotyledons | Caprifoliaceae | <i>Valeriana</i> | <i>Valeriana jatamansi</i> | GQ434936 |
| Eudicotyledons | Rosaceae       | <i>Rubus</i>     | <i>Rubus occidentalis</i>  | HQ596824 |
| Eudicotyledons | Rosaceae       | <i>Rubus</i>     | <i>Rubus occidentalis</i>  | EU750532 |
| Eudicotyledons | Rosaceae       | <i>Rubus</i>     | <i>Rubus occidentalis</i>  | EU750533 |
| Eudicotyledons | Rosaceae       | <i>Rubus</i>     | <i>Rubus occidentalis</i>  | EU750534 |
| Eudicotyledons | Rosaceae       | <i>Rubus</i>     | <i>Rubus occidentalis</i>  | EU750535 |
| Eudicotyledons | Moraceae       | <i>Ficus</i>     | <i>Ficus insipida</i>      | GQ438012 |
| Eudicotyledons | Moraceae       | <i>Ficus</i>     | <i>Ficus insipida</i>      | GQ438013 |
| Eudicotyledons | Moraceae       | <i>Ficus</i>     | <i>Ficus insipida</i>      | GQ438014 |
| Eudicotyledons | Moraceae       | <i>Ficus</i>     | <i>Ficus insipida</i>      | GQ438015 |
| Eudicotyledons | Moraceae       | <i>Ficus</i>     | <i>Ficus insipida</i>      | GQ438016 |
| Eudicotyledons | Moraceae       | <i>Ficus</i>     | <i>Ficus insipida</i>      | GQ438017 |
| Eudicotyledons | Moraceae       | <i>Ficus</i>     | <i>Ficus insipida</i>      | GQ438018 |
| Eudicotyledons | Moraceae       | <i>Ficus</i>     | <i>Ficus insipida</i>      | GQ438019 |
| Eudicotyledons | Moraceae       | <i>Ficus</i>     | <i>Ficus insipida</i>      | GQ438020 |
| Eudicotyledons | Moraceae       | <i>Ficus</i>     | <i>Ficus insipida</i>      | GQ438021 |
| Eudicotyledons | Moraceae       | <i>Ficus</i>     | <i>Ficus insipida</i>      | GQ438022 |
| Eudicotyledons | Moraceae       | <i>Ficus</i>     | <i>Ficus insipida</i>      | GQ438023 |
| Eudicotyledons | Moraceae       | <i>Ficus</i>     | <i>Ficus insipida</i>      | GQ438024 |
| Eudicotyledons | Moraceae       | <i>Ficus</i>     | <i>Ficus insipida</i>      | GQ438025 |
| Eudicotyledons | Moraceae       | <i>Ficus</i>     | <i>Ficus insipida</i>      | GQ438026 |
| Eudicotyledons | Moraceae       | <i>Ficus</i>     | <i>Ficus insipida</i>      | GQ438027 |
| Eudicotyledons | Moraceae       | <i>Ficus</i>     | <i>Ficus insipida</i>      | GQ438028 |
| Eudicotyledons | Moraceae       | <i>Ficus</i>     | <i>Ficus insipida</i>      | GQ438029 |
| Eudicotyledons | Moraceae       | <i>Ficus</i>     | <i>Ficus insipida</i>      | GQ438030 |
| Eudicotyledons | Moraceae       | <i>Ficus</i>     | <i>Ficus insipida</i>      | GQ438031 |
| Eudicotyledons | Moraceae       | <i>Ficus</i>     | <i>Ficus insipida</i>      | GQ438032 |
| Eudicotyledons | Moraceae       | <i>Ficus</i>     | <i>Ficus insipida</i>      | GQ438033 |
| Eudicotyledons | Moraceae       | <i>Ficus</i>     | <i>Ficus insipida</i>      | GQ438034 |
| Eudicotyledons | Moraceae       | <i>Ficus</i>     | <i>Ficus insipida</i>      | GQ438035 |
| Eudicotyledons | Moraceae       | <i>Ficus</i>     | <i>Ficus insipida</i>      | GQ438036 |
| Eudicotyledons | Moraceae       | <i>Ficus</i>     | <i>Ficus insipida</i>      | GQ438037 |
| Eudicotyledons | Moraceae       | <i>Ficus</i>     | <i>Ficus insipida</i>      | GQ438038 |
| Eudicotyledons | Moraceae       | <i>Ficus</i>     | <i>Ficus insipida</i>      | GQ438039 |









|                |               |                   |                                 |          |
|----------------|---------------|-------------------|---------------------------------|----------|
| Eudicotyledons | Moraceae      | <i>Ficus</i>      | <i>Ficus insipida</i>           | GQ438201 |
| Eudicotyledons | Moraceae      | <i>Ficus</i>      | <i>Ficus insipida</i>           | GQ438202 |
| Eudicotyledons | Moraceae      | <i>Ficus</i>      | <i>Ficus insipida</i>           | GQ438203 |
| Eudicotyledons | Moraceae      | <i>Ficus</i>      | <i>Ficus insipida</i>           | GQ438204 |
| Eudicotyledons | Moraceae      | <i>Ficus</i>      | <i>Ficus insipida</i>           | GQ438205 |
| Eudicotyledons | Moraceae      | <i>Ficus</i>      | <i>Ficus insipida</i>           | GQ438206 |
| Eudicotyledons | Moraceae      | <i>Ficus</i>      | <i>Ficus insipida</i>           | GQ438207 |
| Eudicotyledons | Moraceae      | <i>Ficus</i>      | <i>Ficus insipida</i>           | GQ438208 |
| Eudicotyledons | Moraceae      | <i>Ficus</i>      | <i>Ficus insipida</i>           | GQ438209 |
| Eudicotyledons | Moraceae      | <i>Ficus</i>      | <i>Ficus insipida</i>           | GQ438210 |
| Eudicotyledons | Moraceae      | <i>Ficus</i>      | <i>Ficus insipida</i>           | GQ438211 |
| Eudicotyledons | Moraceae      | <i>Ficus</i>      | <i>Ficus insipida</i>           | GQ982221 |
| Eudicotyledons | Crassulaceae  | <i>Aeonium</i>    | <i>Aeonium balsamiferum</i>     | AY082192 |
| Eudicotyledons | Crassulaceae  | <i>Aeonium</i>    | <i>Aeonium balsamiferum</i>     | AY082202 |
| Eudicotyledons | Solanaceae    | <i>Lycium</i>     | <i>Lycium ruthenicum</i>        | HM195011 |
| Eudicotyledons | Solanaceae    | <i>Lycium</i>     | <i>Lycium ruthenicum</i>        | HM195012 |
| Eudicotyledons | Solanaceae    | <i>Lycium</i>     | <i>Lycium ruthenicum</i>        | JN045288 |
| Eudicotyledons | Solanaceae    | <i>Lycium</i>     | <i>Lycium ruthenicum</i>        | JN045289 |
| Eudicotyledons | Solanaceae    | <i>Lycium</i>     | <i>Lycium ruthenicum</i>        | JN045290 |
| Eudicotyledons | Ranunculaceae | <i>Ranunculus</i> | <i>Ranunculus crithmifolius</i> | FJ744168 |
| Eudicotyledons | Ranunculaceae | <i>Ranunculus</i> | <i>Ranunculus crithmifolius</i> | FJ744169 |
| Eudicotyledons | Ranunculaceae | <i>Ranunculus</i> | <i>Ranunculus crithmifolius</i> | FJ744170 |
| Eudicotyledons | Ranunculaceae | <i>Ranunculus</i> | <i>Ranunculus insignis</i>      | FJ744174 |
| Eudicotyledons | Ranunculaceae | <i>Ranunculus</i> | <i>Ranunculus insignis</i>      | FJ744175 |
| Eudicotyledons | Ranunculaceae | <i>Ranunculus</i> | <i>Ranunculus insignis</i>      | FJ744176 |
| Eudicotyledons | Fabaceae      | <i>Schotia</i>    | <i>Schotia latifolia</i>        | GQ405091 |
| Eudicotyledons | Fabaceae      | <i>Schotia</i>    | <i>Schotia latifolia</i>        | GQ405093 |
| Eudicotyledons | Fabaceae      | <i>Schotia</i>    | <i>Schotia latifolia</i>        | GQ405096 |
| Eudicotyledons | Fabaceae      | <i>Schotia</i>    | <i>Schotia latifolia</i>        | GQ405102 |
| Eudicotyledons | Fabaceae      | <i>Schotia</i>    | <i>Schotia latifolia</i>        | GQ405111 |
| Eudicotyledons | Fabaceae      | <i>Schotia</i>    | <i>Schotia latifolia</i>        | GQ405112 |
| Eudicotyledons | Fabaceae      | <i>Schotia</i>    | <i>Schotia latifolia</i>        | GQ405116 |
| Eudicotyledons | Fabaceae      | <i>Schotia</i>    | <i>Schotia latifolia</i>        | GQ405118 |
| Eudicotyledons | Fabaceae      | <i>Schotia</i>    | <i>Schotia latifolia</i>        | GQ405119 |
| Eudicotyledons | Fabaceae      | <i>Schotia</i>    | <i>Schotia latifolia</i>        | GQ405120 |
| Eudicotyledons | Fabaceae      | <i>Schotia</i>    | <i>Schotia latifolia</i>        | GQ405126 |
| Eudicotyledons | Moraceae      | <i>Ficus</i>      | <i>Ficus benjamina</i>          | GU935092 |
| Eudicotyledons | Moraceae      | <i>Ficus</i>      | <i>Ficus benjamina</i>          | GU935093 |
| Eudicotyledons | Moraceae      | <i>Ficus</i>      | <i>Ficus benjamina</i>          | FN675798 |
| Eudicotyledons | Moraceae      | <i>Ficus</i>      | <i>Ficus benjamina</i>          | JN044511 |
| Eudicotyledons | Moraceae      | <i>Ficus</i>      | <i>Ficus benjamina</i>          | JN044512 |
| Eudicotyledons | Lamiaceae     | <i>Mentha</i>     | <i>Mentha aquatica</i>          | FR726099 |
| Eudicotyledons | Lamiaceae     | <i>Mentha</i>     | <i>Mentha aquatica</i>          | FR726100 |
| Eudicotyledons | Lamiaceae     | <i>Mentha</i>     | <i>Mentha aquatica</i>          | AY643656 |
| Eudicotyledons | Lamiaceae     | <i>Mentha</i>     | <i>Mentha aquatica</i>          | AY643657 |
| Eudicotyledons | Lamiaceae     | <i>Mentha</i>     | <i>Mentha aquatica</i>          | AY643658 |
| Eudicotyledons | Lamiaceae     | <i>Mentha</i>     | <i>Mentha aquatica</i>          | AY643659 |
| Eudicotyledons | Lamiaceae     | <i>Mentha</i>     | <i>Mentha aquatica</i>          | AY643660 |
| Eudicotyledons | Lamiaceae     | <i>Mentha</i>     | <i>Mentha aquatica</i>          | AY643661 |
| Eudicotyledons | Lamiaceae     | <i>Mentha</i>     | <i>Mentha aquatica</i>          | AY643662 |
| Eudicotyledons | Asteraceae    | <i>Encelia</i>    | <i>Encelia farinosa</i>         | DQ661036 |
| Eudicotyledons | Asteraceae    | <i>Encelia</i>    | <i>Encelia farinosa</i>         | DQ661037 |
| Eudicotyledons | Asteraceae    | <i>Encelia</i>    | <i>Encelia farinosa</i>         | DQ661038 |









|                |               |                    |                                   |          |
|----------------|---------------|--------------------|-----------------------------------|----------|
| Eudicotyledons | Moraceae      | <i>Brosimum</i>    | <i>Brosimum alicastrum</i>        | GQ437206 |
| Eudicotyledons | Moraceae      | <i>Brosimum</i>    | <i>Brosimum alicastrum</i>        | GQ982162 |
| Eudicotyledons | Lamiaceae     | <i>Isodon</i>      | <i>Isodon lophanthoides</i>       | JN045037 |
| Eudicotyledons | Lamiaceae     | <i>Isodon</i>      | <i>Isodon lophanthoides</i>       | JN045038 |
| Eudicotyledons | Loranthaceae  | <i>Macrosolen</i>  | <i>Macrosolen cochinchinensis</i> | HQ317809 |
| Eudicotyledons | Loranthaceae  | <i>Macrosolen</i>  | <i>Macrosolen cochinchinensis</i> | HQ317810 |
| Eudicotyledons | Loranthaceae  | <i>Macrosolen</i>  | <i>Macrosolen cochinchinensis</i> | HQ317811 |
| Eudicotyledons | Loranthaceae  | <i>Macrosolen</i>  | <i>Macrosolen cochinchinensis</i> | JN687575 |
| Eudicotyledons | Loranthaceae  | <i>Scurrula</i>    | <i>Scurrula chingii</i>           | HQ317814 |
| Eudicotyledons | Loranthaceae  | <i>Scurrula</i>    | <i>Scurrula chingii</i>           | HQ317815 |
| Eudicotyledons | Loranthaceae  | <i>Taxillus</i>    | <i>Taxillus chinensis</i>         | HQ317821 |
| Eudicotyledons | Loranthaceae  | <i>Taxillus</i>    | <i>Taxillus chinensis</i>         | HQ317822 |
| Eudicotyledons | Loranthaceae  | <i>Taxillus</i>    | <i>Taxillus chinensis</i>         | HQ317823 |
| Eudicotyledons | Loranthaceae  | <i>Taxillus</i>    | <i>Taxillus chinensis</i>         | HQ317824 |
| Eudicotyledons | Loranthaceae  | <i>Taxillus</i>    | <i>Taxillus chinensis</i>         | HQ317825 |
| Eudicotyledons | Loranthaceae  | <i>Taxillus</i>    | <i>Taxillus chinensis</i>         | HQ317826 |
| Eudicotyledons | Loranthaceae  | <i>Taxillus</i>    | <i>Taxillus chinensis</i>         | HQ317827 |
| Eudicotyledons | Loranthaceae  | <i>Taxillus</i>    | <i>Taxillus chinensis</i>         | HQ317828 |
| Eudicotyledons | Loranthaceae  | <i>Taxillus</i>    | <i>Taxillus chinensis</i>         | HQ317829 |
| Eudicotyledons | Loranthaceae  | <i>Taxillus</i>    | <i>Taxillus chinensis</i>         | HQ317830 |
| Eudicotyledons | Loranthaceae  | <i>Taxillus</i>    | <i>Taxillus chinensis</i>         | HQ317831 |
| Eudicotyledons | Loranthaceae  | <i>Taxillus</i>    | <i>Taxillus chinensis</i>         | GQ435467 |
| Eudicotyledons | Malvaceae     | <i>Cristaria</i>   | <i>Cristaria aspera</i>           | AY371674 |
| Eudicotyledons | Malvaceae     | <i>Cristaria</i>   | <i>Cristaria aspera</i>           | AY371685 |
| Eudicotyledons | Malvaceae     | <i>Cristaria</i>   | <i>Cristaria multifida</i>        | AY371681 |
| Eudicotyledons | Malvaceae     | <i>Cristaria</i>   | <i>Cristaria multifida</i>        | AY371684 |
| Eudicotyledons | Lamiaceae     | <i>Clinopodium</i> | <i>Clinopodium ashei</i>          | DQ667348 |
| Eudicotyledons | Lamiaceae     | <i>Clinopodium</i> | <i>Clinopodium ashei</i>          | AY943551 |
| Eudicotyledons | Lamiaceae     | <i>Clinopodium</i> | <i>Clinopodium ashei</i>          | AY943552 |
| Eudicotyledons | Lamiaceae     | <i>Clinopodium</i> | <i>Clinopodium ashei</i>          | AY943553 |
| Eudicotyledons | Lamiaceae     | <i>Clinopodium</i> | <i>Clinopodium ashei</i>          | AY943554 |
| Eudicotyledons | Ranunculaceae | <i>Coptis</i>      | <i>Coptis teeta</i>               | JN862875 |
| Eudicotyledons | Ranunculaceae | <i>Coptis</i>      | <i>Coptis teeta</i>               | JN862876 |
| Eudicotyledons | Ranunculaceae | <i>Coptis</i>      | <i>Coptis teeta</i>               | JN862877 |
| Eudicotyledons | Ranunculaceae | <i>Coptis</i>      | <i>Coptis teeta</i>               | AB163743 |
| Eudicotyledons | Ranunculaceae | <i>Coptis</i>      | <i>Coptis teeta</i>               | HQ829539 |
| Eudicotyledons | Ranunculaceae | <i>Coptis</i>      | <i>Coptis teeta</i>               | HQ829540 |
| Eudicotyledons | Ranunculaceae | <i>Coptis</i>      | <i>Coptis teeta</i>               | HQ829541 |
| Eudicotyledons | Ranunculaceae | <i>Coptis</i>      | <i>Coptis teeta</i>               | HQ829542 |
| Eudicotyledons | Ranunculaceae | <i>Coptis</i>      | <i>Coptis chinensis</i>           | GQ435206 |
| Eudicotyledons | Ranunculaceae | <i>Coptis</i>      | <i>Coptis chinensis</i>           | GQ435207 |
| Eudicotyledons | Ranunculaceae | <i>Coptis</i>      | <i>Coptis chinensis</i>           | JN862866 |
| Eudicotyledons | Ranunculaceae | <i>Coptis</i>      | <i>Coptis chinensis</i>           | JN862867 |
| Eudicotyledons | Ranunculaceae | <i>Coptis</i>      | <i>Coptis chinensis</i>           | JN862868 |
| Eudicotyledons | Ranunculaceae | <i>Coptis</i>      | <i>Coptis chinensis</i>           | JN862869 |
| Eudicotyledons | Ranunculaceae | <i>Coptis</i>      | <i>Coptis chinensis</i>           | JN862870 |
| Eudicotyledons | Ranunculaceae | <i>Coptis</i>      | <i>Coptis chinensis</i>           | JN862872 |
| Eudicotyledons | Ranunculaceae | <i>Coptis</i>      | <i>Coptis chinensis</i>           | AB163745 |
| Eudicotyledons | Ranunculaceae | <i>Coptis</i>      | <i>Coptis chinensis</i>           | HQ829527 |
| Eudicotyledons | Ranunculaceae | <i>Coptis</i>      | <i>Coptis chinensis</i>           | HQ829528 |
| Eudicotyledons | Ranunculaceae | <i>Coptis</i>      | <i>Coptis chinensis</i>           | HQ829529 |
| Eudicotyledons | Lamiaceae     | <i>Salvia</i>      | <i>Salvia fruticosa</i>           | EU627579 |
| Eudicotyledons | Lamiaceae     | <i>Salvia</i>      | <i>Salvia fruticosa</i>           | FJ513109 |



|                |              |                  |                              |          |
|----------------|--------------|------------------|------------------------------|----------|
| Eudicotyledons | Lamiaceae    | <i>Salvia</i>    | <i>Salvia fruticosa</i>      | HQ902840 |
| Eudicotyledons | Lamiaceae    | <i>Salvia</i>    | <i>Salvia fruticosa</i>      | HQ902859 |
| Eudicotyledons | Lamiaceae    | <i>Salvia</i>    | <i>Salvia greatae</i>        | DQ667339 |
| Eudicotyledons | Lamiaceae    | <i>Salvia</i>    | <i>Salvia greatae</i>        | HQ418921 |
| Eudicotyledons | Tamaricaceae | <i>Myricaria</i> | <i>Myricaria germanica</i>   | EU914131 |
| Eudicotyledons | Tamaricaceae | <i>Myricaria</i> | <i>Myricaria germanica</i>   | EU914132 |
| Eudicotyledons | Tamaricaceae | <i>Myricaria</i> | <i>Myricaria germanica</i>   | HQ680684 |
| Eudicotyledons | Tamaricaceae | <i>Myricaria</i> | <i>Myricaria germanica</i>   | HQ680687 |
| Eudicotyledons | Lamiaceae    | <i>Mentha</i>    | <i>Mentha arvensis</i>       | DQ667410 |
| Eudicotyledons | Lamiaceae    | <i>Mentha</i>    | <i>Mentha arvensis</i>       | HQ596770 |
| Eudicotyledons | Lamiaceae    | <i>Mentha</i>    | <i>Mentha arvensis</i>       | AY643665 |
| Eudicotyledons | Lamiaceae    | <i>Mentha</i>    | <i>Mentha canadensis</i>     | GQ434942 |
| Eudicotyledons | Lamiaceae    | <i>Mentha</i>    | <i>Mentha canadensis</i>     | JN406990 |
| Eudicotyledons | Lamiaceae    | <i>Mentha</i>    | <i>Mentha canadensis</i>     | JN406991 |
| Eudicotyledons | Lamiaceae    | <i>Mentha</i>    | <i>Mentha canadensis</i>     | JN406992 |
| Eudicotyledons | Lamiaceae    | <i>Mentha</i>    | <i>Mentha canadensis</i>     | JN406993 |
| Eudicotyledons | Lamiaceae    | <i>Mentha</i>    | <i>Mentha canadensis</i>     | AY643663 |
| Eudicotyledons | Lamiaceae    | <i>Mentha</i>    | <i>Mentha canadensis</i>     | AY643664 |
| Eudicotyledons | Lamiaceae    | <i>Mentha</i>    | <i>Mentha canadensis</i>     | HM590119 |
| Eudicotyledons | Lamiaceae    | <i>Phlomis</i>   | <i>Phlomis lychnitis</i>     | AY792624 |
| Eudicotyledons | Lamiaceae    | <i>Phlomis</i>   | <i>Phlomis lychnitis</i>     | AY792625 |
| Eudicotyledons | Lamiaceae    | <i>Phlomis</i>   | <i>Phlomis lychnitis</i>     | AY792626 |
| Eudicotyledons | Lamiaceae    | <i>Phlomis</i>   | <i>Phlomis lychnitis</i>     | AY792627 |
| Eudicotyledons | Lamiaceae    | <i>Phlomis</i>   | <i>Phlomis lychnitis</i>     | AY792628 |
| Eudicotyledons | Lamiaceae    | <i>Phlomis</i>   | <i>Phlomis lychnitis</i>     | AY792629 |
| Eudicotyledons | Lamiaceae    | <i>Phlomis</i>   | <i>Phlomis lychnitis</i>     | AY792630 |
| Eudicotyledons | Lamiaceae    | <i>Phlomis</i>   | <i>Phlomis lychnitis</i>     | AY792631 |
| Eudicotyledons | Lamiaceae    | <i>Phlomis</i>   | <i>Phlomis lychnitis</i>     | AY792632 |
| Eudicotyledons | Lamiaceae    | <i>Phlomis</i>   | <i>Phlomis lychnitis</i>     | AY792633 |
| Eudicotyledons | Lamiaceae    | <i>Phlomis</i>   | <i>Phlomis lychnitis</i>     | AY792634 |
| Eudicotyledons | Lamiaceae    | <i>Phlomis</i>   | <i>Phlomis lychnitis</i>     | AY792635 |
| Eudicotyledons | Lamiaceae    | <i>Phlomis</i>   | <i>Phlomis lychnitis</i>     | AY792636 |
| Eudicotyledons | Lamiaceae    | <i>Phlomis</i>   | <i>Phlomis lychnitis</i>     | AY792637 |
| Eudicotyledons | Lamiaceae    | <i>Phlomis</i>   | <i>Phlomis lychnitis</i>     | AY792638 |
| Eudicotyledons | Lamiaceae    | <i>Phlomis</i>   | <i>Phlomis lychnitis</i>     | AY792639 |
| Eudicotyledons | Lamiaceae    | <i>Phlomis</i>   | <i>Phlomis lychnitis</i>     | AY792640 |
| Eudicotyledons | Lamiaceae    | <i>Phlomis</i>   | <i>Phlomis lychnitis</i>     | AY792641 |
| Eudicotyledons | Lamiaceae    | <i>Phlomis</i>   | <i>Phlomis lychnitis</i>     | AY792642 |
| Eudicotyledons | Lamiaceae    | <i>Phlomis</i>   | <i>Phlomis lychnitis</i>     | AY792643 |
| Eudicotyledons | Lamiaceae    | <i>Phlomis</i>   | <i>Phlomis lychnitis</i>     | AY792644 |
| Eudicotyledons | Lamiaceae    | <i>Phlomis</i>   | <i>Phlomis lychnitis</i>     | AY792645 |
| Eudicotyledons | Lamiaceae    | <i>Phlomis</i>   | <i>Phlomis lychnitis</i>     | AY792646 |
| Eudicotyledons | Lamiaceae    | <i>Conradina</i> | <i>Conradina brevifolia</i>  | AY943531 |
| Eudicotyledons | Lamiaceae    | <i>Conradina</i> | <i>Conradina brevifolia</i>  | AY943532 |
| Eudicotyledons | Lamiaceae    | <i>Conradina</i> | <i>Conradina brevifolia</i>  | AY943533 |
| Eudicotyledons | Lamiaceae    | <i>Conradina</i> | <i>Conradina brevifolia</i>  | AY943534 |
| Eudicotyledons | Lamiaceae    | <i>Conradina</i> | <i>Conradina brevifolia</i>  | AY943535 |
| Eudicotyledons | Lamiaceae    | <i>Conradina</i> | <i>Conradina canescens</i>   | DQ667349 |
| Eudicotyledons | Lamiaceae    | <i>Conradina</i> | <i>Conradina canescens</i>   | AY943536 |
| Eudicotyledons | Lamiaceae    | <i>Conradina</i> | <i>Conradina canescens</i>   | AY943537 |
| Eudicotyledons | Lamiaceae    | <i>Conradina</i> | <i>Conradina canescens</i>   | AY943538 |
| Eudicotyledons | Lamiaceae    | <i>Conradina</i> | <i>Conradina grandiflora</i> | AY943544 |
| Eudicotyledons | Lamiaceae    | <i>Conradina</i> | <i>Conradina grandiflora</i> | AY943545 |

|                |           |                    |                                         |          |
|----------------|-----------|--------------------|-----------------------------------------|----------|
| Eudicotyledons | Lamiaceae | <i>Conradina</i>   | <i>Conradina grandiflora</i>            | AY943546 |
| Eudicotyledons | Lamiaceae | <i>Conradina</i>   | <i>Conradina grandiflora</i>            | AY943547 |
| Eudicotyledons | Lamiaceae | <i>Conradina</i>   | <i>Conradina sp. Edwards et al. 133</i> | AY943548 |
| Eudicotyledons | Lamiaceae | <i>Conradina</i>   | <i>Conradina sp. Edwards et al. 133</i> | AY943549 |
| Eudicotyledons | Lamiaceae | <i>Salvia</i>      | <i>Salvia cacaliifolia</i>              | DQ667367 |
| Eudicotyledons | Lamiaceae | <i>Salvia</i>      | <i>Salvia cacaliifolia</i>              | HQ418903 |
| Eudicotyledons | Lamiaceae | <i>Salvia</i>      | <i>Salvia patens</i>                    | DQ667361 |
| Eudicotyledons | Lamiaceae | <i>Salvia</i>      | <i>Salvia patens</i>                    | HQ418937 |
| Eudicotyledons | Lamiaceae | <i>Salvia</i>      | <i>Salvia prunelloides</i>              | DQ667371 |
| Eudicotyledons | Lamiaceae | <i>Salvia</i>      | <i>Salvia prunelloides</i>              | HQ418938 |
| Eudicotyledons | Rutaceae  | <i>Citrus</i>      | <i>Citrus limetta</i>                   | JN315368 |
| Eudicotyledons | Rutaceae  | <i>Citrus</i>      | <i>Citrus limetta</i>                   | JN315369 |
| Eudicotyledons | Lamiaceae | <i>Isodon</i>      | <i>Isodon japonicus</i>                 | AB446238 |
| Eudicotyledons | Lamiaceae | <i>Isodon</i>      | <i>Isodon japonicus</i>                 | AB446239 |
| Eudicotyledons | Lamiaceae | <i>Isodon</i>      | <i>Isodon japonicus</i>                 | AB446240 |
| Eudicotyledons | Lamiaceae | <i>Isodon</i>      | <i>Isodon japonicus</i>                 | AB556804 |
| Eudicotyledons | Lamiaceae | <i>Isodon</i>      | <i>Isodon japonicus</i>                 | AB556815 |
| Eudicotyledons | Lamiaceae | <i>Isodon</i>      | <i>Isodon japonicus</i>                 | FJ513115 |
| Eudicotyledons | Lamiaceae | <i>Isodon</i>      | <i>Isodon trichocarpus</i>              | AB556805 |
| Eudicotyledons | Lamiaceae | <i>Isodon</i>      | <i>Isodon trichocarpus</i>              | AB556810 |
| Eudicotyledons | Lamiaceae | <i>Clinopodium</i> | <i>Clinopodium chinense</i>             | EU590865 |
| Eudicotyledons | Lamiaceae | <i>Clinopodium</i> | <i>Clinopodium chinense</i>             | FJ513089 |
| Eudicotyledons | Lamiaceae | <i>Isodon</i>      | <i>Isodon longitubus</i>                | AB446204 |
| Eudicotyledons | Lamiaceae | <i>Isodon</i>      | <i>Isodon longitubus</i>                | AB446205 |
| Eudicotyledons | Lamiaceae | <i>Isodon</i>      | <i>Isodon longitubus</i>                | AB446206 |
| Eudicotyledons | Lamiaceae | <i>Isodon</i>      | <i>Isodon longitubus</i>                | AB446207 |
| Eudicotyledons | Lamiaceae | <i>Isodon</i>      | <i>Isodon longitubus</i>                | AB446208 |
| Eudicotyledons | Lamiaceae | <i>Isodon</i>      | <i>Isodon longitubus</i>                | AB446209 |
| Eudicotyledons | Lamiaceae | <i>Isodon</i>      | <i>Isodon longitubus</i>                | AB446210 |
| Eudicotyledons | Lamiaceae | <i>Isodon</i>      | <i>Isodon longitubus</i>                | AB446211 |
| Eudicotyledons | Lamiaceae | <i>Isodon</i>      | <i>Isodon longitubus</i>                | AB446212 |
| Eudicotyledons | Lamiaceae | <i>Isodon</i>      | <i>Isodon longitubus</i>                | AB446213 |
| Eudicotyledons | Lamiaceae | <i>Isodon</i>      | <i>Isodon longitubus</i>                | AB446214 |
| Eudicotyledons | Lamiaceae | <i>Isodon</i>      | <i>Isodon longitubus</i>                | AB446215 |
| Eudicotyledons | Lamiaceae | <i>Isodon</i>      | <i>Isodon longitubus</i>                | AB446216 |
| Eudicotyledons | Lamiaceae | <i>Isodon</i>      | <i>Isodon longitubus</i>                | AB446217 |
| Eudicotyledons | Lamiaceae | <i>Isodon</i>      | <i>Isodon longitubus</i>                | AB446218 |
| Eudicotyledons | Lamiaceae | <i>Isodon</i>      | <i>Isodon longitubus</i>                | AB446219 |
| Eudicotyledons | Lamiaceae | <i>Isodon</i>      | <i>Isodon longitubus</i>                | AB446220 |
| Eudicotyledons | Lamiaceae | <i>Isodon</i>      | <i>Isodon longitubus</i>                | AB446221 |
| Eudicotyledons | Lamiaceae | <i>Isodon</i>      | <i>Isodon longitubus</i>                | AB446222 |
| Eudicotyledons | Lamiaceae | <i>Isodon</i>      | <i>Isodon longitubus</i>                | AB556814 |
| Eudicotyledons | Lamiaceae | <i>Isodon</i>      | <i>Isodon longitubus</i>                | AB556817 |
| Eudicotyledons | Meliaceae | <i>Carapa</i>      | <i>Carapa procera</i>                   | GQ428752 |
| Eudicotyledons | Meliaceae | <i>Carapa</i>      | <i>Carapa procera</i>                   | FJ039000 |
| Eudicotyledons | Meliaceae | <i>Carapa</i>      | <i>Carapa procera</i>                   | FJ039001 |
| Eudicotyledons | Meliaceae | <i>Carapa</i>      | <i>Carapa procera</i>                   | JF288754 |
| Eudicotyledons | Rosaceae  | <i>Potentilla</i>  | <i>Potentilla argentea</i>              | GQ384965 |
| Eudicotyledons | Rosaceae  | <i>Potentilla</i>  | <i>Potentilla argentea</i>              | GQ384977 |
| Eudicotyledons | Rosaceae  | <i>Potentilla</i>  | <i>Potentilla argentea</i>              | GQ384986 |
| Eudicotyledons | Rosaceae  | <i>Potentilla</i>  | <i>Potentilla argentea</i>              | HM776523 |
| Eudicotyledons | Rosaceae  | <i>Potentilla</i>  | <i>Potentilla argentea</i>              | HM776524 |
| Eudicotyledons | Rosaceae  | <i>Potentilla</i>  | <i>Potentilla argentea</i>              | HM776525 |



|                |                 |                    |                                |          |
|----------------|-----------------|--------------------|--------------------------------|----------|
| Eudicotyledons | Brassicaceae    | <i>Capsella</i>    | <i>Capsella bursa-pastoris</i> | FR822345 |
| Eudicotyledons | Brassicaceae    | <i>Capsella</i>    | <i>Capsella bursa-pastoris</i> | FR822346 |
| Eudicotyledons | Brassicaceae    | <i>Capsella</i>    | <i>Capsella bursa-pastoris</i> | FJ493269 |
| Eudicotyledons | Solanaceae      | <i>Solanum</i>     | <i>Solanum melongena</i>       | HM016405 |
| Eudicotyledons | Solanaceae      | <i>Solanum</i>     | <i>Solanum melongena</i>       | HM016406 |
| Eudicotyledons | Solanaceae      | <i>Solanum</i>     | <i>Solanum melongena</i>       | HM016407 |
| Eudicotyledons | Solanaceae      | <i>Solanum</i>     | <i>Solanum melongena</i>       | HM016408 |
| Eudicotyledons | Solanaceae      | <i>Solanum</i>     | <i>Solanum melongena</i>       | HM016409 |
| Eudicotyledons | Solanaceae      | <i>Solanum</i>     | <i>Solanum melongena</i>       | HM016410 |
| Eudicotyledons | Fabaceae        | <i>Canavalia</i>   | <i>Canavalia cathartica</i>    | GU396816 |
| Eudicotyledons | Fabaceae        | <i>Canavalia</i>   | <i>Canavalia cathartica</i>    | HQ707430 |
| Eudicotyledons | Fabaceae        | <i>Canavalia</i>   | <i>Canavalia cathartica</i>    | HQ707432 |
| Eudicotyledons | Rosaceae        | <i>Chaenomeles</i> | <i>Chaenomeles cathayensis</i> | JQ390648 |
| Eudicotyledons | Rosaceae        | <i>Chaenomeles</i> | <i>Chaenomeles cathayensis</i> | JQ390652 |
| Eudicotyledons | Caryophyllaceae | <i>Silene</i>      | <i>Silene latifolia</i>        | EF091495 |
| Eudicotyledons | Caryophyllaceae | <i>Silene</i>      | <i>Silene latifolia</i>        | EF091496 |
| Eudicotyledons | Caryophyllaceae | <i>Silene</i>      | <i>Silene latifolia</i>        | EF091497 |
| Eudicotyledons | Caryophyllaceae | <i>Silene</i>      | <i>Silene latifolia</i>        | EF091498 |
| Eudicotyledons | Caryophyllaceae | <i>Silene</i>      | <i>Silene latifolia</i>        | EF091499 |
| Eudicotyledons | Caryophyllaceae | <i>Silene</i>      | <i>Silene latifolia</i>        | EF091500 |
| Eudicotyledons | Caryophyllaceae | <i>Silene</i>      | <i>Silene latifolia</i>        | EF091501 |
| Eudicotyledons | Caryophyllaceae | <i>Silene</i>      | <i>Silene latifolia</i>        | EF091502 |
| Eudicotyledons | Caryophyllaceae | <i>Silene</i>      | <i>Silene latifolia</i>        | EF091503 |
| Eudicotyledons | Caryophyllaceae | <i>Silene</i>      | <i>Silene latifolia</i>        | EF091504 |
| Eudicotyledons | Caryophyllaceae | <i>Silene</i>      | <i>Silene latifolia</i>        | EF091505 |
| Eudicotyledons | Caryophyllaceae | <i>Silene</i>      | <i>Silene latifolia</i>        | EF091506 |
| Eudicotyledons | Caryophyllaceae | <i>Silene</i>      | <i>Silene latifolia</i>        | EF091507 |
| Eudicotyledons | Caryophyllaceae | <i>Silene</i>      | <i>Silene latifolia</i>        | EF091508 |
| Eudicotyledons | Caryophyllaceae | <i>Silene</i>      | <i>Silene latifolia</i>        | EF091509 |
| Eudicotyledons | Caryophyllaceae | <i>Silene</i>      | <i>Silene latifolia</i>        | EF091510 |
| Eudicotyledons | Caryophyllaceae | <i>Silene</i>      | <i>Silene latifolia</i>        | EF091511 |
| Eudicotyledons | Caryophyllaceae | <i>Silene</i>      | <i>Silene latifolia</i>        | EF091512 |
| Eudicotyledons | Caryophyllaceae | <i>Silene</i>      | <i>Silene latifolia</i>        | EF091513 |
| Eudicotyledons | Caryophyllaceae | <i>Silene</i>      | <i>Silene latifolia</i>        | EF091514 |
| Eudicotyledons | Caryophyllaceae | <i>Silene</i>      | <i>Silene latifolia</i>        | EF091515 |
| Eudicotyledons | Caryophyllaceae | <i>Silene</i>      | <i>Silene latifolia</i>        | EF091516 |
| Eudicotyledons | Caryophyllaceae | <i>Silene</i>      | <i>Silene latifolia</i>        | EF091517 |
| Eudicotyledons | Caryophyllaceae | <i>Silene</i>      | <i>Silene latifolia</i>        | EF091518 |
| Eudicotyledons | Caryophyllaceae | <i>Silene</i>      | <i>Silene latifolia</i>        | EF091519 |
| Eudicotyledons | Caryophyllaceae | <i>Silene</i>      | <i>Silene latifolia</i>        | EF091520 |
| Eudicotyledons | Caryophyllaceae | <i>Silene</i>      | <i>Silene latifolia</i>        | EF091521 |
| Eudicotyledons | Caryophyllaceae | <i>Silene</i>      | <i>Silene latifolia</i>        | EF091522 |
| Eudicotyledons | Caryophyllaceae | <i>Silene</i>      | <i>Silene latifolia</i>        | EF091524 |
| Eudicotyledons | Caryophyllaceae | <i>Silene</i>      | <i>Silene latifolia</i>        | EF091525 |
| Eudicotyledons | Caryophyllaceae | <i>Silene</i>      | <i>Silene latifolia</i>        | EF091526 |
| Eudicotyledons | Caryophyllaceae | <i>Silene</i>      | <i>Silene latifolia</i>        | EF091528 |
| Eudicotyledons | Caryophyllaceae | <i>Silene</i>      | <i>Silene latifolia</i>        | EF091529 |
| Eudicotyledons | Caryophyllaceae | <i>Silene</i>      | <i>Silene latifolia</i>        | EF091530 |
| Eudicotyledons | Caryophyllaceae | <i>Silene</i>      | <i>Silene latifolia</i>        | EF091531 |
| Eudicotyledons | Caryophyllaceae | <i>Silene</i>      | <i>Silene latifolia</i>        | EF091532 |
| Eudicotyledons | Caryophyllaceae | <i>Silene</i>      | <i>Silene latifolia</i>        | GU562391 |
| Eudicotyledons | Caryophyllaceae | <i>Silene</i>      | <i>Silene latifolia</i>        | AF518904 |
| Eudicotyledons | Caryophyllaceae | <i>Silene</i>      | <i>Silene latifolia</i>        | AF518905 |





|                |                 |                 |                             |          |
|----------------|-----------------|-----------------|-----------------------------|----------|
| Eudicotyledons | Caryophyllaceae | <i>Silene</i>   | <i>Silene vulgaris</i>      | AY629274 |
| Eudicotyledons | Caryophyllaceae | <i>Silene</i>   | <i>Silene vulgaris</i>      | AY629275 |
| Eudicotyledons | Caryophyllaceae | <i>Silene</i>   | <i>Silene vulgaris</i>      | AY629276 |
| Eudicotyledons | Caryophyllaceae | <i>Silene</i>   | <i>Silene vulgaris</i>      | AY629277 |
| Eudicotyledons | Caryophyllaceae | <i>Silene</i>   | <i>Silene vulgaris</i>      | AY629278 |
| Eudicotyledons | Caryophyllaceae | <i>Silene</i>   | <i>Silene vulgaris</i>      | AY629279 |
| Eudicotyledons | Caryophyllaceae | <i>Silene</i>   | <i>Silene vulgaris</i>      | AY629280 |
| Eudicotyledons | Caryophyllaceae | <i>Silene</i>   | <i>Silene vulgaris</i>      | AY629281 |
| Eudicotyledons | Caryophyllaceae | <i>Silene</i>   | <i>Silene vulgaris</i>      | AY629282 |
| Eudicotyledons | Caryophyllaceae | <i>Silene</i>   | <i>Silene vulgaris</i>      | AY629283 |
| Eudicotyledons | Caryophyllaceae | <i>Silene</i>   | <i>Silene vulgaris</i>      | AY629284 |
| Eudicotyledons | Caryophyllaceae | <i>Silene</i>   | <i>Silene vulgaris</i>      | AY629285 |
| Eudicotyledons | Caryophyllaceae | <i>Silene</i>   | <i>Silene vulgaris</i>      | AY629286 |
| Eudicotyledons | Caryophyllaceae | <i>Silene</i>   | <i>Silene vulgaris</i>      | AY629287 |
| Eudicotyledons | Caryophyllaceae | <i>Silene</i>   | <i>Silene vulgaris</i>      | AY629288 |
| Eudicotyledons | Caryophyllaceae | <i>Silene</i>   | <i>Silene vulgaris</i>      | AY629289 |
| Eudicotyledons | Caryophyllaceae | <i>Silene</i>   | <i>Silene vulgaris</i>      | AY629290 |
| Eudicotyledons | Caryophyllaceae | <i>Silene</i>   | <i>Silene vulgaris</i>      | AY629291 |
| Eudicotyledons | Caryophyllaceae | <i>Silene</i>   | <i>Silene vulgaris</i>      | AY629292 |
| Eudicotyledons | Caryophyllaceae | <i>Silene</i>   | <i>Silene vulgaris</i>      | AY629294 |
| Eudicotyledons | Caryophyllaceae | <i>Silene</i>   | <i>Silene vulgaris</i>      | AY629295 |
| Eudicotyledons | Caryophyllaceae | <i>Silene</i>   | <i>Silene vulgaris</i>      | AY629296 |
| Eudicotyledons | Caryophyllaceae | <i>Silene</i>   | <i>Silene vulgaris</i>      | AY629297 |
| Eudicotyledons | Caryophyllaceae | <i>Silene</i>   | <i>Silene vulgaris</i>      | EU750548 |
| Eudicotyledons | Caryophyllaceae | <i>Silene</i>   | <i>Silene vulgaris</i>      | EU750549 |
| Eudicotyledons | Caryophyllaceae | <i>Silene</i>   | <i>Silene vulgaris</i>      | EU750550 |
| Eudicotyledons | Caryophyllaceae | <i>Silene</i>   | <i>Silene vulgaris</i>      | EU805570 |
| Eudicotyledons | Caryophyllaceae | <i>Silene</i>   | <i>Silene vulgaris</i>      | EU805571 |
| Eudicotyledons | Caryophyllaceae | <i>Silene</i>   | <i>Silene vulgaris</i>      | EU805572 |
| Eudicotyledons | Caryophyllaceae | <i>Silene</i>   | <i>Silene vulgaris</i>      | EU805573 |
| Eudicotyledons | Caryophyllaceae | <i>Silene</i>   | <i>Silene vulgaris</i>      | EU805574 |
| Eudicotyledons | Gentianaceae    | <i>Swertia</i>  | <i>Swertia tetraptera</i>   | JN047299 |
| Eudicotyledons | Gentianaceae    | <i>Swertia</i>  | <i>Swertia tetraptera</i>   | JN047300 |
| Eudicotyledons | Apiaceae        | <i>Angelica</i> | <i>Angelica decursiva</i>   | GQ435318 |
| Eudicotyledons | Apiaceae        | <i>Angelica</i> | <i>Angelica decursiva</i>   | GQ435319 |
| Eudicotyledons | Caryophyllaceae | <i>Silene</i>   | <i>Silene aprica</i>        | JN047101 |
| Eudicotyledons | Caryophyllaceae | <i>Silene</i>   | <i>Silene aprica</i>        | JN047102 |
| Eudicotyledons | Caryophyllaceae | <i>Silene</i>   | <i>Silene aprica</i>        | JN047103 |
| Eudicotyledons | Caryophyllaceae | <i>Silene</i>   | <i>Silene aprica</i>        | JN047104 |
| Eudicotyledons | Caryophyllaceae | <i>Silene</i>   | <i>Silene aprica</i>        | JN047105 |
| Eudicotyledons | Caryophyllaceae | <i>Silene</i>   | <i>Silene aprica</i>        | JN047106 |
| Eudicotyledons | Caryophyllaceae | <i>Silene</i>   | <i>Silene aprica</i>        | JN047107 |
| Eudicotyledons | Caryophyllaceae | <i>Silene</i>   | <i>Silene aprica</i>        | JN047108 |
| Eudicotyledons | Caryophyllaceae | <i>Silene</i>   | <i>Silene aprica</i>        | JN047109 |
| Eudicotyledons | Caryophyllaceae | <i>Silene</i>   | <i>Silene aprica</i>        | JN047110 |
| Eudicotyledons | Caryophyllaceae | <i>Silene</i>   | <i>Silene aprica</i>        | JN047111 |
| Eudicotyledons | Caryophyllaceae | <i>Silene</i>   | <i>Silene aprica</i>        | JN047112 |
| Eudicotyledons | Oleaceae        | <i>Fraxinus</i> | <i>Fraxinus mandshurica</i> | HM367487 |
| Eudicotyledons | Oleaceae        | <i>Fraxinus</i> | <i>Fraxinus mandshurica</i> | HM367488 |
| Eudicotyledons | Oleaceae        | <i>Fraxinus</i> | <i>Fraxinus mandshurica</i> | HM367489 |
| Eudicotyledons | Oleaceae        | <i>Fraxinus</i> | <i>Fraxinus mandshurica</i> | HM367490 |
| Eudicotyledons | Oleaceae        | <i>Fraxinus</i> | <i>Fraxinus mandshurica</i> | HM367491 |
| Eudicotyledons | Oleaceae        | <i>Fraxinus</i> | <i>Fraxinus mandshurica</i> | HM367492 |







|                |               |                     |                                |          |
|----------------|---------------|---------------------|--------------------------------|----------|
| Eudicotyledons | Saxifragaceae | <i>Mitella</i>      | <i>Mitella pauciflora</i>      | AB492610 |
| Eudicotyledons | Saxifragaceae | <i>Mitella</i>      | <i>Mitella pauciflora</i>      | AB492611 |
| Eudicotyledons | Saxifragaceae | <i>Mitella</i>      | <i>Mitella yoshinagae</i>      | AB492535 |
| Eudicotyledons | Saxifragaceae | <i>Mitella</i>      | <i>Mitella yoshinagae</i>      | AB492536 |
| Eudicotyledons | Saxifragaceae | <i>Mitella</i>      | <i>Mitella yoshinagae</i>      | AB492537 |
| Eudicotyledons | Saxifragaceae | <i>Mitella</i>      | <i>Mitella yoshinagae</i>      | AB492538 |
| Eudicotyledons | Saxifragaceae | <i>Mitella</i>      | <i>Mitella yoshinagae</i>      | AB492539 |
| Eudicotyledons | Saxifragaceae | <i>Mitella</i>      | <i>Mitella yoshinagae</i>      | AB492540 |
| Eudicotyledons | Saxifragaceae | <i>Mitella</i>      | <i>Mitella yoshinagae</i>      | AB492541 |
| Eudicotyledons | Saxifragaceae | <i>Mitella</i>      | <i>Mitella yoshinagae</i>      | AB492542 |
| Eudicotyledons | Saxifragaceae | <i>Mitella</i>      | <i>Mitella yoshinagae</i>      | AB492543 |
| Eudicotyledons | Saxifragaceae | <i>Mitella</i>      | <i>Mitella yoshinagae</i>      | AB492544 |
| Eudicotyledons | Saxifragaceae | <i>Mitella</i>      | <i>Mitella yoshinagae</i>      | AB492545 |
| Eudicotyledons | Saxifragaceae | <i>Mitella</i>      | <i>Mitella yoshinagae</i>      | AB492546 |
| Eudicotyledons | Saxifragaceae | <i>Mitella</i>      | <i>Mitella yoshinagae</i>      | AB492547 |
| Eudicotyledons | Saxifragaceae | <i>Mitella</i>      | <i>Mitella yoshinagae</i>      | AB492548 |
| Eudicotyledons | Oleaceae      | <i>Fraxinus</i>     | <i>Fraxinus texensis</i>       | HM367558 |
| Eudicotyledons | Oleaceae      | <i>Fraxinus</i>     | <i>Fraxinus texensis</i>       | HM367559 |
| Eudicotyledons | Rosaceae      | <i>Chaenomeles</i>  | <i>Chaenomeles speciosa</i>    | JQ390646 |
| Eudicotyledons | Rosaceae      | <i>Chaenomeles</i>  | <i>Chaenomeles speciosa</i>    | JQ390649 |
| Eudicotyledons | Rosaceae      | <i>Chaenomeles</i>  | <i>Chaenomeles speciosa</i>    | JQ390650 |
| Eudicotyledons | Rosaceae      | <i>Chaenomeles</i>  | <i>Chaenomeles speciosa</i>    | JQ390651 |
| Eudicotyledons | Rosaceae      | <i>Chaenomeles</i>  | <i>Chaenomeles speciosa</i>    | JQ390653 |
| Eudicotyledons | Oleaceae      | <i>Fraxinus</i>     | <i>Fraxinus greggii</i>        | HM367428 |
| Eudicotyledons | Oleaceae      | <i>Fraxinus</i>     | <i>Fraxinus greggii</i>        | HM367429 |
| Eudicotyledons | Oleaceae      | <i>Fraxinus</i>     | <i>Fraxinus greggii</i>        | HM367430 |
| Eudicotyledons | Oleaceae      | <i>Fraxinus</i>     | <i>Fraxinus greggii</i>        | HM367431 |
| Eudicotyledons | Oleaceae      | <i>Fraxinus</i>     | <i>Fraxinus greggii</i>        | HM367432 |
| Eudicotyledons | Oleaceae      | <i>Fraxinus</i>     | <i>Fraxinus greggii</i>        | HM367433 |
| Eudicotyledons | Oleaceae      | <i>Fraxinus</i>     | <i>Fraxinus angustifolia</i>   | HE659569 |
| Eudicotyledons | Oleaceae      | <i>Fraxinus</i>     | <i>Fraxinus angustifolia</i>   | HM367365 |
| Eudicotyledons | Oleaceae      | <i>Fraxinus</i>     | <i>Fraxinus angustifolia</i>   | HM367366 |
| Eudicotyledons | Oleaceae      | <i>Fraxinus</i>     | <i>Fraxinus angustifolia</i>   | HM367367 |
| Eudicotyledons | Oleaceae      | <i>Fraxinus</i>     | <i>Fraxinus angustifolia</i>   | HM367368 |
| Eudicotyledons | Oleaceae      | <i>Fraxinus</i>     | <i>Fraxinus angustifolia</i>   | HM367369 |
| Eudicotyledons | Oleaceae      | <i>Fraxinus</i>     | <i>Fraxinus angustifolia</i>   | HM367370 |
| Eudicotyledons | Oleaceae      | <i>Fraxinus</i>     | <i>Fraxinus angustifolia</i>   | HM367371 |
| Eudicotyledons | Oleaceae      | <i>Fraxinus</i>     | <i>Fraxinus angustifolia</i>   | HM367372 |
| Eudicotyledons | Oleaceae      | <i>Fraxinus</i>     | <i>Fraxinus angustifolia</i>   | HM367373 |
| Eudicotyledons | Oleaceae      | <i>Fraxinus</i>     | <i>Fraxinus angustifolia</i>   | HM367374 |
| Eudicotyledons | Oleaceae      | <i>Fraxinus</i>     | <i>Fraxinus angustifolia</i>   | HM367375 |
| Eudicotyledons | Oleaceae      | <i>Fraxinus</i>     | <i>Fraxinus angustifolia</i>   | HM367376 |
| Eudicotyledons | Oleaceae      | <i>Fraxinus</i>     | <i>Fraxinus angustifolia</i>   | HM367377 |
| Eudicotyledons | Oleaceae      | <i>Fraxinus</i>     | <i>Fraxinus angustifolia</i>   | HM367378 |
| Eudicotyledons | Ericaceae     | <i>Rhododendron</i> | <i>Rhododendron fortunei</i>   | HQ706969 |
| Eudicotyledons | Ericaceae     | <i>Rhododendron</i> | <i>Rhododendron fortunei</i>   | HQ706970 |
| Eudicotyledons | Ericaceae     | <i>Rhododendron</i> | <i>Rhododendron fortunei</i>   | HQ706971 |
| Eudicotyledons | Ericaceae     | <i>Rhododendron</i> | <i>Rhododendron fortunei</i>   | HQ706972 |
| Eudicotyledons | Ericaceae     | <i>Rhododendron</i> | <i>Rhododendron latoucheae</i> | HQ426990 |
| Eudicotyledons | Ericaceae     | <i>Rhododendron</i> | <i>Rhododendron latoucheae</i> | HQ706992 |
| Eudicotyledons | Ranunculaceae | <i>Eranthis</i>     | <i>Eranthis pinnatifida</i>    | JF505843 |
| Eudicotyledons | Ranunculaceae | <i>Eranthis</i>     | <i>Eranthis pinnatifida</i>    | JF505844 |
| Eudicotyledons | Ranunculaceae | <i>Eranthis</i>     | <i>Eranthis pinnatifida</i>    | JF505845 |

|                |               |                     |                               |          |
|----------------|---------------|---------------------|-------------------------------|----------|
| Eudicotyledons | Ranunculaceae | <i>Eranthis</i>     | <i>Eranthis pinnatifida</i>   | JF505846 |
| Eudicotyledons | Ranunculaceae | <i>Eranthis</i>     | <i>Eranthis pinnatifida</i>   | JF505847 |
| Eudicotyledons | Ranunculaceae | <i>Eranthis</i>     | <i>Eranthis pinnatifida</i>   | JF505848 |
| Eudicotyledons | Saxifragaceae | <i>Mitella</i>      | <i>Mitella formosana</i>      | AB492549 |
| Eudicotyledons | Saxifragaceae | <i>Mitella</i>      | <i>Mitella formosana</i>      | AB492550 |
| Eudicotyledons | Saxifragaceae | <i>Mitella</i>      | <i>Mitella formosana</i>      | AB492551 |
| Eudicotyledons | Saxifragaceae | <i>Mitella</i>      | <i>Mitella formosana</i>      | AB492552 |
| Eudicotyledons | Saxifragaceae | <i>Mitella</i>      | <i>Mitella formosana</i>      | AB492553 |
| Eudicotyledons | Saxifragaceae | <i>Mitella</i>      | <i>Mitella formosana</i>      | AB492554 |
| Eudicotyledons | Saxifragaceae | <i>Mitella</i>      | <i>Mitella formosana</i>      | AB492555 |
| Eudicotyledons | Saxifragaceae | <i>Mitella</i>      | <i>Mitella formosana</i>      | AB492556 |
| Eudicotyledons | Lamiaceae     | <i>Origanum</i>     | <i>Origanum majorana</i>      | FR726122 |
| Eudicotyledons | Lamiaceae     | <i>Origanum</i>     | <i>Origanum majorana</i>      | FR726123 |
| Eudicotyledons | Lamiaceae     | <i>Origanum</i>     | <i>Origanum majorana</i>      | FR726124 |
| Eudicotyledons | Lamiaceae     | <i>Origanum</i>     | <i>Origanum majorana</i>      | FR726125 |
| Eudicotyledons | Lamiaceae     | <i>Origanum</i>     | <i>Origanum majorana</i>      | HQ902835 |
| Eudicotyledons | Ericaceae     | <i>Rhododendron</i> | <i>Rhododendron delavayi</i>  | JN046793 |
| Eudicotyledons | Ericaceae     | <i>Rhododendron</i> | <i>Rhododendron delavayi</i>  | JN046794 |
| Eudicotyledons | Ericaceae     | <i>Rhododendron</i> | <i>Rhododendron delavayi</i>  | JN046795 |
| Eudicotyledons | Ericaceae     | <i>Rhododendron</i> | <i>Rhododendron delavayi</i>  | JN046796 |
| Eudicotyledons | Ericaceae     | <i>Rhododendron</i> | <i>Rhododendron delavayi</i>  | JN046797 |
| Eudicotyledons | Ericaceae     | <i>Rhododendron</i> | <i>Rhododendron delavayi</i>  | HM636525 |
| Eudicotyledons | Ericaceae     | <i>Rhododendron</i> | <i>Rhododendron delavayi</i>  | HQ706960 |
| Eudicotyledons | Ericaceae     | <i>Rhododendron</i> | <i>Rhododendron delavayi</i>  | HQ706961 |
| Eudicotyledons | Ericaceae     | <i>Rhododendron</i> | <i>Rhododendron irroratum</i> | JN046846 |
| Eudicotyledons | Ericaceae     | <i>Rhododendron</i> | <i>Rhododendron irroratum</i> | JN046847 |
| Eudicotyledons | Ericaceae     | <i>Rhododendron</i> | <i>Rhododendron irroratum</i> | JN046848 |
| Eudicotyledons | Ericaceae     | <i>Rhododendron</i> | <i>Rhododendron irroratum</i> | JN046849 |
| Eudicotyledons | Ericaceae     | <i>Rhododendron</i> | <i>Rhododendron irroratum</i> | HQ706986 |
| Eudicotyledons | Ericaceae     | <i>Rhododendron</i> | <i>Rhododendron irroratum</i> | HQ706987 |
| Eudicotyledons | Ericaceae     | <i>Rhododendron</i> | <i>Rhododendron irroratum</i> | HQ706988 |
| Eudicotyledons | Orobanchaceae | <i>Pedicularis</i>  | <i>Pedicularis rex</i>        | JN046094 |
| Eudicotyledons | Orobanchaceae | <i>Pedicularis</i>  | <i>Pedicularis rex</i>        | JN046095 |
| Eudicotyledons | Orobanchaceae | <i>Pedicularis</i>  | <i>Pedicularis rex</i>        | JN046096 |
| Eudicotyledons | Orobanchaceae | <i>Pedicularis</i>  | <i>Pedicularis rex</i>        | JN046097 |
| Eudicotyledons | Orobanchaceae | <i>Pedicularis</i>  | <i>Pedicularis rex</i>        | JN046098 |
| Eudicotyledons | Solanaceae    | <i>Petunia</i>      | <i>Petunia altiplana</i>      | DQ791909 |
| Eudicotyledons | Solanaceae    | <i>Petunia</i>      | <i>Petunia altiplana</i>      | DQ791910 |
| Eudicotyledons | Solanaceae    | <i>Petunia</i>      | <i>Petunia altiplana</i>      | DQ791911 |
| Eudicotyledons | Solanaceae    | <i>Petunia</i>      | <i>Petunia altiplana</i>      | DQ791912 |
| Eudicotyledons | Solanaceae    | <i>Petunia</i>      | <i>Petunia altiplana</i>      | DQ791913 |
| Eudicotyledons | Solanaceae    | <i>Petunia</i>      | <i>Petunia altiplana</i>      | DQ791914 |
| Eudicotyledons | Solanaceae    | <i>Petunia</i>      | <i>Petunia altiplana</i>      | DQ791915 |
| Eudicotyledons | Solanaceae    | <i>Petunia</i>      | <i>Petunia altiplana</i>      | DQ791916 |
| Eudicotyledons | Solanaceae    | <i>Petunia</i>      | <i>Petunia altiplana</i>      | DQ791917 |
| Eudicotyledons | Solanaceae    | <i>Petunia</i>      | <i>Petunia altiplana</i>      | DQ791918 |
| Eudicotyledons | Solanaceae    | <i>Petunia</i>      | <i>Petunia altiplana</i>      | DQ791919 |
| Eudicotyledons | Solanaceae    | <i>Petunia</i>      | <i>Petunia altiplana</i>      | DQ791920 |
| Eudicotyledons | Solanaceae    | <i>Petunia</i>      | <i>Petunia altiplana</i>      | DQ791921 |
| Eudicotyledons | Solanaceae    | <i>Petunia</i>      | <i>Petunia altiplana</i>      | DQ791922 |
| Eudicotyledons | Solanaceae    | <i>Petunia</i>      | <i>Petunia altiplana</i>      | DQ791923 |
| Eudicotyledons | Solanaceae    | <i>Petunia</i>      | <i>Petunia altiplana</i>      | DQ791924 |
| Eudicotyledons | Solanaceae    | <i>Petunia</i>      | <i>Petunia altiplana</i>      | DQ791925 |







|                |              |                     |                                |          |
|----------------|--------------|---------------------|--------------------------------|----------|
| Eudicotyledons | Celastraceae | <i>Euonymus</i>     | <i>Euonymus oxyphyllus</i>     | AB525299 |
| Eudicotyledons | Celastraceae | <i>Euonymus</i>     | <i>Euonymus oxyphyllus</i>     | AB525300 |
| Eudicotyledons | Celastraceae | <i>Euonymus</i>     | <i>Euonymus oxyphyllus</i>     | AB525301 |
| Eudicotyledons | Celastraceae | <i>Euonymus</i>     | <i>Euonymus oxyphyllus</i>     | AB525302 |
| Eudicotyledons | Celastraceae | <i>Euonymus</i>     | <i>Euonymus oxyphyllus</i>     | AB525303 |
| Eudicotyledons | Celastraceae | <i>Euonymus</i>     | <i>Euonymus oxyphyllus</i>     | AB525304 |
| Eudicotyledons | Celastraceae | <i>Euonymus</i>     | <i>Euonymus oxyphyllus</i>     | AB525305 |
| Eudicotyledons | Celastraceae | <i>Euonymus</i>     | <i>Euonymus oxyphyllus</i>     | AB525306 |
| Eudicotyledons | Celastraceae | <i>Euonymus</i>     | <i>Euonymus oxyphyllus</i>     | AB525307 |
| Eudicotyledons | Celastraceae | <i>Euonymus</i>     | <i>Euonymus oxyphyllus</i>     | AB525308 |
| Eudicotyledons | Celastraceae | <i>Euonymus</i>     | <i>Euonymus oxyphyllus</i>     | AB525309 |
| Eudicotyledons | Apiaceae     | <i>Heracleum</i>    | <i>Heracleum dissectum</i>     | EF042117 |
| Eudicotyledons | Apiaceae     | <i>Heracleum</i>    | <i>Heracleum dissectum</i>     | GU967815 |
| Eudicotyledons | Ericaceae    | <i>Rhododendron</i> | <i>Rhododendron aganniphum</i> | JN046733 |
| Eudicotyledons | Ericaceae    | <i>Rhododendron</i> | <i>Rhododendron aganniphum</i> | JN046734 |
| Eudicotyledons | Ericaceae    | <i>Rhododendron</i> | <i>Rhododendron aganniphum</i> | HQ706948 |
| Eudicotyledons | Ericaceae    | <i>Rhododendron</i> | <i>Rhododendron selense</i>    | JN046955 |
| Eudicotyledons | Ericaceae    | <i>Rhododendron</i> | <i>Rhododendron selense</i>    | JN046956 |
| Eudicotyledons | Ericaceae    | <i>Rhododendron</i> | <i>Rhododendron selense</i>    | JN046957 |
| Eudicotyledons | Ericaceae    | <i>Rhododendron</i> | <i>Rhododendron selense</i>    | JN046958 |
| Eudicotyledons | Solanaceae   | <i>Solanum</i>      | <i>Solanum lichtensteinii</i>  | HM016421 |
| Eudicotyledons | Solanaceae   | <i>Solanum</i>      | <i>Solanum lichtensteinii</i>  | HM016426 |
| Eudicotyledons | Oleaceae     | <i>Fraxinus</i>     | <i>Fraxinus berlandieriana</i> | HM367389 |
| Eudicotyledons | Oleaceae     | <i>Fraxinus</i>     | <i>Fraxinus berlandieriana</i> | HM367390 |
| Eudicotyledons | Oleaceae     | <i>Fraxinus</i>     | <i>Fraxinus berlandieriana</i> | HM367391 |
| Eudicotyledons | Oleaceae     | <i>Fraxinus</i>     | <i>Fraxinus bungeana</i>       | HM367394 |
| Eudicotyledons | Oleaceae     | <i>Fraxinus</i>     | <i>Fraxinus bungeana</i>       | HM367395 |
| Eudicotyledons | Oleaceae     | <i>Fraxinus</i>     | <i>Fraxinus bungeana</i>       | HM367396 |
| Eudicotyledons | Oleaceae     | <i>Fraxinus</i>     | <i>Fraxinus lanuginosa</i>     | HM367443 |
| Eudicotyledons | Oleaceae     | <i>Fraxinus</i>     | <i>Fraxinus lanuginosa</i>     | HM367444 |
| Eudicotyledons | Oleaceae     | <i>Fraxinus</i>     | <i>Fraxinus lanuginosa</i>     | HM367445 |
| Eudicotyledons | Oleaceae     | <i>Fraxinus</i>     | <i>Fraxinus lanuginosa</i>     | HM367446 |
| Eudicotyledons | Oleaceae     | <i>Fraxinus</i>     | <i>Fraxinus lanuginosa</i>     | HM367447 |
| Eudicotyledons | Oleaceae     | <i>Fraxinus</i>     | <i>Fraxinus lanuginosa</i>     | HM367448 |
| Eudicotyledons | Oleaceae     | <i>Fraxinus</i>     | <i>Fraxinus lanuginosa</i>     | HM367449 |
| Eudicotyledons | Oleaceae     | <i>Fraxinus</i>     | <i>Fraxinus lanuginosa</i>     | HM367450 |
| Eudicotyledons | Oleaceae     | <i>Fraxinus</i>     | <i>Fraxinus lanuginosa</i>     | HM367451 |
| Eudicotyledons | Oleaceae     | <i>Fraxinus</i>     | <i>Fraxinus lanuginosa</i>     | HM367452 |
| Eudicotyledons | Oleaceae     | <i>Fraxinus</i>     | <i>Fraxinus lanuginosa</i>     | HM367453 |
| Eudicotyledons | Oleaceae     | <i>Fraxinus</i>     | <i>Fraxinus lanuginosa</i>     | HM367454 |
| Eudicotyledons | Oleaceae     | <i>Fraxinus</i>     | <i>Fraxinus lanuginosa</i>     | HM367455 |
| Eudicotyledons | Oleaceae     | <i>Fraxinus</i>     | <i>Fraxinus lanuginosa</i>     | HM367456 |
| Eudicotyledons | Oleaceae     | <i>Fraxinus</i>     | <i>Fraxinus lanuginosa</i>     | HM367457 |
| Eudicotyledons | Oleaceae     | <i>Fraxinus</i>     | <i>Fraxinus lanuginosa</i>     | HM367458 |
| Eudicotyledons | Oleaceae     | <i>Fraxinus</i>     | <i>Fraxinus lanuginosa</i>     | HM367460 |
| Eudicotyledons | Oleaceae     | <i>Fraxinus</i>     | <i>Fraxinus lanuginosa</i>     | HM367461 |
| Eudicotyledons | Oleaceae     | <i>Fraxinus</i>     | <i>Fraxinus lanuginosa</i>     | HM367462 |
| Eudicotyledons | Oleaceae     | <i>Fraxinus</i>     | <i>Fraxinus lanuginosa</i>     | HM367463 |
| Eudicotyledons | Oleaceae     | <i>Fraxinus</i>     | <i>Fraxinus lanuginosa</i>     | HM367464 |
| Eudicotyledons | Oleaceae     | <i>Fraxinus</i>     | <i>Fraxinus lanuginosa</i>     | HM367465 |
| Eudicotyledons | Oleaceae     | <i>Fraxinus</i>     | <i>Fraxinus lanuginosa</i>     | HM367466 |
| Eudicotyledons | Oleaceae     | <i>Fraxinus</i>     | <i>Fraxinus uhdei</i>          | HM367567 |
| Eudicotyledons | Oleaceae     | <i>Fraxinus</i>     | <i>Fraxinus uhdei</i>          | HM367568 |

|                |               |                     |                                 |          |
|----------------|---------------|---------------------|---------------------------------|----------|
| Eudicotyledons | Oleaceae      | <i>Fraxinus</i>     | <i>Fraxinus uhdei</i>           | HM367569 |
| Eudicotyledons | Oleaceae      | <i>Fraxinus</i>     | <i>Fraxinus uhdei</i>           | HM367570 |
| Eudicotyledons | Loasaceae     | <i>Mentzelia</i>    | <i>Mentzelia jonesii</i>        | FJ918158 |
| Eudicotyledons | Loasaceae     | <i>Mentzelia</i>    | <i>Mentzelia jonesii</i>        | FJ918159 |
| Eudicotyledons | Loasaceae     | <i>Mentzelia</i>    | <i>Mentzelia jonesii</i>        | FJ918160 |
| Eudicotyledons | Loasaceae     | <i>Mentzelia</i>    | <i>Mentzelia jonesii</i>        | FJ918161 |
| Eudicotyledons | Loasaceae     | <i>Mentzelia</i>    | <i>Mentzelia jonesii</i>        | FJ918162 |
| Eudicotyledons | Loasaceae     | <i>Mentzelia</i>    | <i>Mentzelia thompsonii</i>     | FJ918203 |
| Eudicotyledons | Loasaceae     | <i>Mentzelia</i>    | <i>Mentzelia thompsonii</i>     | FJ918204 |
| Eudicotyledons | Loasaceae     | <i>Mentzelia</i>    | <i>Mentzelia thompsonii</i>     | FJ918205 |
| Eudicotyledons | Cucurbitaceae | <i>Momordica</i>    | <i>Momordica camerounensis</i>  | GQ162988 |
| Eudicotyledons | Cucurbitaceae | <i>Momordica</i>    | <i>Momordica camerounensis</i>  | GQ162989 |
| Eudicotyledons | Oleaceae      | <i>Fraxinus</i>     | <i>Fraxinus griffithii</i>      | HM367434 |
| Eudicotyledons | Oleaceae      | <i>Fraxinus</i>     | <i>Fraxinus griffithii</i>      | HM367435 |
| Eudicotyledons | Oleaceae      | <i>Fraxinus</i>     | <i>Fraxinus griffithii</i>      | HM367436 |
| Eudicotyledons | Oleaceae      | <i>Fraxinus</i>     | <i>Fraxinus malacophylla</i>    | HM367485 |
| Eudicotyledons | Oleaceae      | <i>Fraxinus</i>     | <i>Fraxinus malacophylla</i>    | HM367486 |
| Eudicotyledons | Lamiaceae     | <i>Origanum</i>     | <i>Origanum sp. MIB zpl(1)</i>  | FR726126 |
| Eudicotyledons | Lamiaceae     | <i>Origanum</i>     | <i>Origanum sp. MIB zpl(1)</i>  | FR726127 |
| Eudicotyledons | Lamiaceae     | <i>Origanum</i>     | <i>Origanum sp. MIB zpl(1)</i>  | FR726128 |
| Eudicotyledons | Brassicaceae  | <i>Capsella</i>     | <i>Capsella orientalis</i>      | FR822347 |
| Eudicotyledons | Brassicaceae  | <i>Capsella</i>     | <i>Capsella orientalis</i>      | FR822348 |
| Eudicotyledons | Brassicaceae  | <i>Capsella</i>     | <i>Capsella orientalis</i>      | FR822349 |
| Eudicotyledons | Ericaceae     | <i>Rhododendron</i> | <i>Rhododendron traillianum</i> | JN046991 |
| Eudicotyledons | Ericaceae     | <i>Rhododendron</i> | <i>Rhododendron traillianum</i> | JN046992 |
| Eudicotyledons | Ericaceae     | <i>Rhododendron</i> | <i>Rhododendron traillianum</i> | JN046993 |
| Eudicotyledons | Begoniaceae   | <i>Begonia</i>      | <i>Begonia purpureofolia</i>    | JN044120 |
| Eudicotyledons | Begoniaceae   | <i>Begonia</i>      | <i>Begonia purpureofolia</i>    | JN044121 |
| Eudicotyledons | Begoniaceae   | <i>Begonia</i>      | <i>Begonia purpureofolia</i>    | JN044122 |
| Eudicotyledons | Begoniaceae   | <i>Begonia</i>      | <i>Begonia purpureofolia</i>    | JN044123 |
| Eudicotyledons | Begoniaceae   | <i>Begonia</i>      | <i>Begonia purpureofolia</i>    | JN044124 |
| Eudicotyledons | Begoniaceae   | <i>Begonia</i>      | <i>Begonia purpureofolia</i>    | JN044125 |
| Eudicotyledons | Rubiaceae     | <i>Oldenlandia</i>  | <i>Oldenlandia chrysotricha</i> | JF699778 |
| Eudicotyledons | Rubiaceae     | <i>Oldenlandia</i>  | <i>Oldenlandia chrysotricha</i> | JF699779 |
| Eudicotyledons | Rubiaceae     | <i>Oldenlandia</i>  | <i>Oldenlandia chrysotricha</i> | JF699780 |
| Eudicotyledons | Rubiaceae     | <i>Oldenlandia</i>  | <i>Oldenlandia chrysotricha</i> | JF699781 |
| Eudicotyledons | Rubiaceae     | <i>Oldenlandia</i>  | <i>Oldenlandia chrysotricha</i> | JN044767 |
| Eudicotyledons | Rubiaceae     | <i>Oldenlandia</i>  | <i>Oldenlandia chrysotricha</i> | JN044768 |
| Eudicotyledons | Fabaceae      | <i>Schizolobium</i> | <i>Schizolobium parahyba</i>    | GQ167769 |
| Eudicotyledons | Fabaceae      | <i>Schizolobium</i> | <i>Schizolobium parahyba</i>    | AF524985 |
| Eudicotyledons | Fabaceae      | <i>Schizolobium</i> | <i>Schizolobium parahyba</i>    | FJ668606 |
| Eudicotyledons | Fabaceae      | <i>Schizolobium</i> | <i>Schizolobium parahyba</i>    | FJ668607 |
| Eudicotyledons | Fabaceae      | <i>Schizolobium</i> | <i>Schizolobium parahyba</i>    | FJ668610 |
| Eudicotyledons | Fabaceae      | <i>Schizolobium</i> | <i>Schizolobium parahyba</i>    | FJ668611 |
| Eudicotyledons | Fabaceae      | <i>Schizolobium</i> | <i>Schizolobium parahyba</i>    | FJ668612 |
| Eudicotyledons | Fabaceae      | <i>Schizolobium</i> | <i>Schizolobium parahyba</i>    | FJ668613 |
| Eudicotyledons | Fabaceae      | <i>Schizolobium</i> | <i>Schizolobium parahyba</i>    | GQ982357 |
| Eudicotyledons | Gesneriaceae  | <i>Cyrtandra</i>    | <i>Cyrtandra hawaiiensis</i>    | GQ475133 |
| Eudicotyledons | Gesneriaceae  | <i>Cyrtandra</i>    | <i>Cyrtandra hawaiiensis</i>    | GQ475158 |
| Eudicotyledons | Gesneriaceae  | <i>Cyrtandra</i>    | <i>Cyrtandra hawaiiensis</i>    | GQ475159 |
| Eudicotyledons | Gesneriaceae  | <i>Cyrtandra</i>    | <i>Cyrtandra hawaiiensis</i>    | EU920008 |
| Eudicotyledons | Lamiaceae     | <i>Thymus</i>       | <i>Thymus vulgaris</i>          | FR726148 |
| Eudicotyledons | Lamiaceae     | <i>Thymus</i>       | <i>Thymus vulgaris</i>          | FR726149 |



|                |               |                     |                               |          |
|----------------|---------------|---------------------|-------------------------------|----------|
| Eudicotyledons | Lamiaceae     | <i>Thymus</i>       | <i>Thymus vulgaris</i>        | FR726150 |
| Eudicotyledons | Lamiaceae     | <i>Thymus</i>       | <i>Thymus vulgaris</i>        | AY679164 |
| Eudicotyledons | Polygonaceae  | <i>Polygonum</i>    | <i>Polygonum chinense</i>     | GQ435161 |
| Eudicotyledons | Polygonaceae  | <i>Polygonum</i>    | <i>Polygonum chinense</i>     | JN407039 |
| Eudicotyledons | Polygonaceae  | <i>Polygonum</i>    | <i>Polygonum chinense</i>     | JN407040 |
| Eudicotyledons | Polygonaceae  | <i>Polygonum</i>    | <i>Polygonum chinense</i>     | JN407041 |
| Eudicotyledons | Polygonaceae  | <i>Polygonum</i>    | <i>Polygonum chinense</i>     | JN407042 |
| Eudicotyledons | Polygonaceae  | <i>Polygonum</i>    | <i>Polygonum chinense</i>     | EU554053 |
| Eudicotyledons | Apiaceae      | <i>Osmorhiza</i>    | <i>Osmorhiza occidentalis</i> | JN045666 |
| Eudicotyledons | Apiaceae      | <i>Osmorhiza</i>    | <i>Osmorhiza occidentalis</i> | JN045667 |
| Eudicotyledons | Apiaceae      | <i>Osmorhiza</i>    | <i>Osmorhiza occidentalis</i> | JN045668 |
| Eudicotyledons | Apiaceae      | <i>Osmorhiza</i>    | <i>Osmorhiza occidentalis</i> | JN045669 |
| Eudicotyledons | Gesneriaceae  | <i>Cyrtandra</i>    | <i>Cyrtandra compressa</i>    | GQ475128 |
| Eudicotyledons | Gesneriaceae  | <i>Cyrtandra</i>    | <i>Cyrtandra compressa</i>    | EU920029 |
| Eudicotyledons | Gentianaceae  | <i>Gentianopsis</i> | <i>Gentianopsis crinita</i>   | HM460854 |
| Eudicotyledons | Gentianaceae  | <i>Gentianopsis</i> | <i>Gentianopsis crinita</i>   | HM460855 |
| Eudicotyledons | Gentianaceae  | <i>Gentianopsis</i> | <i>Gentianopsis crinita</i>   | HM460856 |
| Eudicotyledons | Ranunculaceae | <i>Aconitum</i>     | <i>Aconitum carmichaelii</i>  | GQ337742 |
| Eudicotyledons | Ranunculaceae | <i>Aconitum</i>     | <i>Aconitum carmichaelii</i>  | GQ337743 |
| Eudicotyledons | Ranunculaceae | <i>Aconitum</i>     | <i>Aconitum carmichaelii</i>  | GQ337744 |
| Eudicotyledons | Ranunculaceae | <i>Aconitum</i>     | <i>Aconitum carmichaelii</i>  | GQ337745 |
| Eudicotyledons | Ranunculaceae | <i>Aconitum</i>     | <i>Aconitum carmichaelii</i>  | GQ337746 |
| Eudicotyledons | Ranunculaceae | <i>Aconitum</i>     | <i>Aconitum carmichaelii</i>  | GQ337747 |
| Eudicotyledons | Ranunculaceae | <i>Aconitum</i>     | <i>Aconitum carmichaelii</i>  | GQ337748 |
| Eudicotyledons | Ranunculaceae | <i>Aconitum</i>     | <i>Aconitum carmichaelii</i>  | GQ337749 |
| Eudicotyledons | Ranunculaceae | <i>Aconitum</i>     | <i>Aconitum carmichaelii</i>  | GQ337750 |
| Eudicotyledons | Ranunculaceae | <i>Aconitum</i>     | <i>Aconitum carmichaelii</i>  | GQ337765 |
| Eudicotyledons | Ranunculaceae | <i>Aconitum</i>     | <i>Aconitum carmichaelii</i>  | GQ337766 |
| Eudicotyledons | Ranunculaceae | <i>Aconitum</i>     | <i>Aconitum carmichaelii</i>  | GQ337767 |
| Eudicotyledons | Ranunculaceae | <i>Aconitum</i>     | <i>Aconitum carmichaelii</i>  | GQ337768 |
| Eudicotyledons | Ranunculaceae | <i>Aconitum</i>     | <i>Aconitum carmichaelii</i>  | GQ337769 |
| Eudicotyledons | Ranunculaceae | <i>Aconitum</i>     | <i>Aconitum carmichaelii</i>  | GQ337770 |
| Eudicotyledons | Ranunculaceae | <i>Aconitum</i>     | <i>Aconitum carmichaelii</i>  | GQ337771 |
| Eudicotyledons | Ranunculaceae | <i>Aconitum</i>     | <i>Aconitum carmichaelii</i>  | GQ337772 |
| Eudicotyledons | Ranunculaceae | <i>Aconitum</i>     | <i>Aconitum carmichaelii</i>  | GQ337773 |
| Eudicotyledons | Ranunculaceae | <i>Aconitum</i>     | <i>Aconitum carmichaelii</i>  | GQ337778 |
| Eudicotyledons | Ranunculaceae | <i>Aconitum</i>     | <i>Aconitum carmichaelii</i>  | GQ337810 |
| Eudicotyledons | Ranunculaceae | <i>Aconitum</i>     | <i>Aconitum carmichaelii</i>  | GQ337811 |
| Eudicotyledons | Ranunculaceae | <i>Aconitum</i>     | <i>Aconitum carmichaelii</i>  | GQ337823 |
| Eudicotyledons | Ranunculaceae | <i>Aconitum</i>     | <i>Aconitum carmichaelii</i>  | GQ337850 |
| Eudicotyledons | Ranunculaceae | <i>Aconitum</i>     | <i>Aconitum carmichaelii</i>  | GQ337851 |
| Eudicotyledons | Ranunculaceae | <i>Aconitum</i>     | <i>Aconitum carmichaelii</i>  | GQ337852 |
| Eudicotyledons | Ranunculaceae | <i>Aconitum</i>     | <i>Aconitum carmichaelii</i>  | GQ337853 |
| Eudicotyledons | Ranunculaceae | <i>Aconitum</i>     | <i>Aconitum carmichaelii</i>  | FJ821166 |
| Eudicotyledons | Ranunculaceae | <i>Aconitum</i>     | <i>Aconitum carmichaelii</i>  | FJ821167 |
| Eudicotyledons | Ranunculaceae | <i>Aconitum</i>     | <i>Aconitum lycoctonum</i>    | AF216560 |
| Eudicotyledons | Ranunculaceae | <i>Aconitum</i>     | <i>Aconitum lycoctonum</i>    | AF216561 |
| Eudicotyledons | Ranunculaceae | <i>Aconitum</i>     | <i>Aconitum lycoctonum</i>    | AF216562 |
| Eudicotyledons | Ranunculaceae | <i>Aconitum</i>     | <i>Aconitum lycoctonum</i>    | AF216563 |
| Eudicotyledons | Ranunculaceae | <i>Aconitum</i>     | <i>Aconitum lycoctonum</i>    | AF216564 |
| Eudicotyledons | Ranunculaceae | <i>Aconitum</i>     | <i>Aconitum lycoctonum</i>    | AF216565 |
| Eudicotyledons | Ranunculaceae | <i>Aconitum</i>     | <i>Aconitum lycoctonum</i>    | AF216566 |
| Eudicotyledons | Ranunculaceae | <i>Aconitum</i>     | <i>Aconitum lycoctonum</i>    | AF216568 |







|                |               |                 |                               |          |
|----------------|---------------|-----------------|-------------------------------|----------|
| Eudicotyledons | Lamiaceae     | <i>Thymus</i>   | <i>Thymus quinquecostatus</i> | AY443429 |
| Eudicotyledons | Lamiaceae     | <i>Thymus</i>   | <i>Thymus quinquecostatus</i> | AY443430 |
| Eudicotyledons | Lamiaceae     | <i>Thymus</i>   | <i>Thymus quinquecostatus</i> | AY443431 |
| Eudicotyledons | Lamiaceae     | <i>Thymus</i>   | <i>Thymus quinquecostatus</i> | HM590114 |
| Eudicotyledons | Lamiaceae     | <i>Thymus</i>   | <i>Thymus magnus</i>          | AY281316 |
| Eudicotyledons | Lamiaceae     | <i>Thymus</i>   | <i>Thymus magnus</i>          | AY281317 |
| Eudicotyledons | Lamiaceae     | <i>Thymus</i>   | <i>Thymus magnus</i>          | AY443432 |
| Eudicotyledons | Lamiaceae     | <i>Thymus</i>   | <i>Thymus magnus</i>          | AY443433 |
| Eudicotyledons | Ranunculaceae | <i>Aconitum</i> | <i>Aconitum kusnezoffii</i>   | GQ337723 |
| Eudicotyledons | Ranunculaceae | <i>Aconitum</i> | <i>Aconitum kusnezoffii</i>   | GQ337724 |
| Eudicotyledons | Ranunculaceae | <i>Aconitum</i> | <i>Aconitum kusnezoffii</i>   | GQ337725 |
| Eudicotyledons | Ranunculaceae | <i>Aconitum</i> | <i>Aconitum kusnezoffii</i>   | GQ337789 |
| Eudicotyledons | Ranunculaceae | <i>Aconitum</i> | <i>Aconitum kusnezoffii</i>   | GQ337790 |
| Eudicotyledons | Ranunculaceae | <i>Aconitum</i> | <i>Aconitum kusnezoffii</i>   | GQ337798 |
| Eudicotyledons | Ranunculaceae | <i>Aconitum</i> | <i>Aconitum kusnezoffii</i>   | GQ337799 |
| Eudicotyledons | Ranunculaceae | <i>Aconitum</i> | <i>Aconitum kusnezoffii</i>   | GQ337812 |
| Eudicotyledons | Ranunculaceae | <i>Aconitum</i> | <i>Aconitum kusnezoffii</i>   | GQ337813 |
| Eudicotyledons | Ranunculaceae | <i>Aconitum</i> | <i>Aconitum kusnezoffii</i>   | GQ337814 |
| Eudicotyledons | Ranunculaceae | <i>Aconitum</i> | <i>Aconitum kusnezoffii</i>   | GQ337836 |
| Eudicotyledons | Ranunculaceae | <i>Aconitum</i> | <i>Aconitum kusnezoffii</i>   | GQ337837 |
| Eudicotyledons | Ranunculaceae | <i>Aconitum</i> | <i>Aconitum kusnezoffii</i>   | GQ337838 |
| Eudicotyledons | Ranunculaceae | <i>Aconitum</i> | <i>Aconitum kusnezoffii</i>   | GQ337839 |
| Eudicotyledons | Ranunculaceae | <i>Aconitum</i> | <i>Aconitum kusnezoffii</i>   | GQ337848 |
| Eudicotyledons | Ranunculaceae | <i>Aconitum</i> | <i>Aconitum kusnezoffii</i>   | GQ337849 |
| Eudicotyledons | Ranunculaceae | <i>Aconitum</i> | <i>Aconitum kusnezoffii</i>   | FJ821181 |
| Eudicotyledons | Ranunculaceae | <i>Aconitum</i> | <i>Aconitum kusnezoffii</i>   | FJ821182 |
| Eudicotyledons | Ranunculaceae | <i>Aconitum</i> | <i>Aconitum kusnezoffii</i>   | FJ821183 |
| Eudicotyledons | Primulaceae   | <i>Primula</i>  | <i>Primula amethystina</i>    | JN046466 |
| Eudicotyledons | Primulaceae   | <i>Primula</i>  | <i>Primula amethystina</i>    | JN046467 |
| Eudicotyledons | Primulaceae   | <i>Primula</i>  | <i>Primula amethystina</i>    | JN046468 |
| Eudicotyledons | Orobanchaceae | <i>Agalinis</i> | <i>Agalinis acuta</i>         | GU943532 |
| Eudicotyledons | Orobanchaceae | <i>Agalinis</i> | <i>Agalinis acuta</i>         | EU827882 |
| Eudicotyledons | Orobanchaceae | <i>Agalinis</i> | <i>Agalinis acuta</i>         | EU827883 |
| Eudicotyledons | Orobanchaceae | <i>Agalinis</i> | <i>Agalinis acuta</i>         | EU827884 |
| Eudicotyledons | Orobanchaceae | <i>Agalinis</i> | <i>Agalinis acuta</i>         | EU827885 |
| Eudicotyledons | Orobanchaceae | <i>Agalinis</i> | <i>Agalinis acuta</i>         | EU827886 |
| Eudicotyledons | Orobanchaceae | <i>Agalinis</i> | <i>Agalinis acuta</i>         | EU827887 |
| Eudicotyledons | Orobanchaceae | <i>Agalinis</i> | <i>Agalinis acuta</i>         | EU827888 |
| Eudicotyledons | Orobanchaceae | <i>Agalinis</i> | <i>Agalinis acuta</i>         | EU827889 |
| Eudicotyledons | Orobanchaceae | <i>Agalinis</i> | <i>Agalinis acuta</i>         | EU827890 |
| Eudicotyledons | Orobanchaceae | <i>Agalinis</i> | <i>Agalinis fasciculata</i>   | EU827904 |
| Eudicotyledons | Orobanchaceae | <i>Agalinis</i> | <i>Agalinis fasciculata</i>   | EU827905 |
| Eudicotyledons | Orobanchaceae | <i>Agalinis</i> | <i>Agalinis fasciculata</i>   | EU827906 |
| Eudicotyledons | Orobanchaceae | <i>Agalinis</i> | <i>Agalinis obtusifolia</i>   | GU943536 |
| Eudicotyledons | Orobanchaceae | <i>Agalinis</i> | <i>Agalinis obtusifolia</i>   | GU943537 |
| Eudicotyledons | Orobanchaceae | <i>Agalinis</i> | <i>Agalinis obtusifolia</i>   | GU943538 |
| Eudicotyledons | Orobanchaceae | <i>Agalinis</i> | <i>Agalinis obtusifolia</i>   | GU943539 |
| Eudicotyledons | Orobanchaceae | <i>Agalinis</i> | <i>Agalinis obtusifolia</i>   | EU827925 |
| Eudicotyledons | Orobanchaceae | <i>Agalinis</i> | <i>Agalinis obtusifolia</i>   | EU827926 |
| Eudicotyledons | Orobanchaceae | <i>Agalinis</i> | <i>Agalinis obtusifolia</i>   | EU827928 |
| Eudicotyledons | Orobanchaceae | <i>Agalinis</i> | <i>Agalinis obtusifolia</i>   | EU827929 |
| Eudicotyledons | Orobanchaceae | <i>Agalinis</i> | <i>Agalinis obtusifolia</i>   | EU827930 |
| Eudicotyledons | Orobanchaceae | <i>Agalinis</i> | <i>Agalinis tenella</i>       | GU943542 |

|                |                |                    |                                |          |
|----------------|----------------|--------------------|--------------------------------|----------|
| Eudicotyledons | Orobanchaceae  | <i>Agalinis</i>    | <i>Agalinis tenella</i>        | GU943543 |
| Eudicotyledons | Orobanchaceae  | <i>Agalinis</i>    | <i>Agalinis tenella</i>        | EU827927 |
| Eudicotyledons | Orobanchaceae  | <i>Agalinis</i>    | <i>Agalinis tenella</i>        | EU827951 |
| Eudicotyledons | Orobanchaceae  | <i>Agalinis</i>    | <i>Agalinis tenella</i>        | EU827952 |
| Eudicotyledons | Orobanchaceae  | <i>Agalinis</i>    | <i>Agalinis tenella</i>        | EU827953 |
| Eudicotyledons | Orobanchaceae  | <i>Agalinis</i>    | <i>Agalinis tenella</i>        | EU827954 |
| Eudicotyledons | Orobanchaceae  | <i>Agalinis</i>    | <i>Agalinis tenella</i>        | EU827955 |
| Eudicotyledons | Ranunculaceae  | <i>Aconitum</i>    | <i>Aconitum albobviolaceum</i> | GQ337824 |
| Eudicotyledons | Ranunculaceae  | <i>Aconitum</i>    | <i>Aconitum albobviolaceum</i> | GQ337825 |
| Eudicotyledons | Ranunculaceae  | <i>Aconitum</i>    | <i>Aconitum albobviolaceum</i> | GQ337826 |
| Eudicotyledons | Ranunculaceae  | <i>Aconitum</i>    | <i>Aconitum albobviolaceum</i> | GQ337830 |
| Eudicotyledons | Ranunculaceae  | <i>Aconitum</i>    | <i>Aconitum albobviolaceum</i> | GQ337831 |
| Eudicotyledons | Ranunculaceae  | <i>Aconitum</i>    | <i>Aconitum albobviolaceum</i> | GQ337832 |
| Eudicotyledons | Ranunculaceae  | <i>Aconitum</i>    | <i>Aconitum albobviolaceum</i> | GQ337833 |
| Eudicotyledons | Ranunculaceae  | <i>Aconitum</i>    | <i>Aconitum albobviolaceum</i> | GQ337834 |
| Eudicotyledons | Ranunculaceae  | <i>Aconitum</i>    | <i>Aconitum albobviolaceum</i> | GQ337835 |
| Eudicotyledons | Ranunculaceae  | <i>Aconitum</i>    | <i>Aconitum albobviolaceum</i> | JN043731 |
| Eudicotyledons | Ranunculaceae  | <i>Aconitum</i>    | <i>Aconitum albobviolaceum</i> | JN043732 |
| Eudicotyledons | Ranunculaceae  | <i>Aconitum</i>    | <i>Aconitum albobviolaceum</i> | JN043733 |
| Eudicotyledons | Ranunculaceae  | <i>Aconitum</i>    | <i>Aconitum albobviolaceum</i> | JN043734 |
| Eudicotyledons | Ranunculaceae  | <i>Aconitum</i>    | <i>Aconitum albobviolaceum</i> | JN043735 |
| Eudicotyledons | Phyllanthaceae | <i>Phyllanthus</i> | <i>Phyllanthus amarus</i>      | GU598561 |
| Eudicotyledons | Phyllanthaceae | <i>Phyllanthus</i> | <i>Phyllanthus amarus</i>      | GU598562 |
| Eudicotyledons | Phyllanthaceae | <i>Phyllanthus</i> | <i>Phyllanthus amarus</i>      | GU598563 |
| Eudicotyledons | Phyllanthaceae | <i>Phyllanthus</i> | <i>Phyllanthus amarus</i>      | GU598564 |
| Eudicotyledons | Phyllanthaceae | <i>Phyllanthus</i> | <i>Phyllanthus amarus</i>      | GU598565 |
| Eudicotyledons | Phyllanthaceae | <i>Phyllanthus</i> | <i>Phyllanthus amarus</i>      | GU598577 |
| Eudicotyledons | Phyllanthaceae | <i>Phyllanthus</i> | <i>Phyllanthus amarus</i>      | GQ409816 |
| Eudicotyledons | Phyllanthaceae | <i>Phyllanthus</i> | <i>Phyllanthus amarus</i>      | GQ409819 |
| Eudicotyledons | Phyllanthaceae | <i>Phyllanthus</i> | <i>Phyllanthus amarus</i>      | GQ409820 |
| Eudicotyledons | Gesneriaceae   | <i>Cyrtandra</i>   | <i>Cyrtandra laxiflora</i>     | GQ475161 |
| Eudicotyledons | Gesneriaceae   | <i>Cyrtandra</i>   | <i>Cyrtandra laxiflora</i>     | EU920007 |
| Eudicotyledons | Gesneriaceae   | <i>Cyrtandra</i>   | <i>Cyrtandra samoensis</i>     | GQ475122 |
| Eudicotyledons | Gesneriaceae   | <i>Cyrtandra</i>   | <i>Cyrtandra samoensis</i>     | GQ475148 |
| Eudicotyledons | Gesneriaceae   | <i>Cyrtandra</i>   | <i>Cyrtandra samoensis</i>     | GQ475150 |
| Eudicotyledons | Gesneriaceae   | <i>Cyrtandra</i>   | <i>Cyrtandra samoensis</i>     | EU920001 |
| Eudicotyledons | Gesneriaceae   | <i>Cyrtandra</i>   | <i>Cyrtandra samoensis</i>     | EU920002 |
| Eudicotyledons | Brassicaceae   | <i>Cardamine</i>   | <i>Cardamine nipponica</i>     | AB365513 |
| Eudicotyledons | Brassicaceae   | <i>Cardamine</i>   | <i>Cardamine nipponica</i>     | AB365514 |
| Eudicotyledons | Brassicaceae   | <i>Cardamine</i>   | <i>Cardamine nipponica</i>     | AB365515 |
| Eudicotyledons | Brassicaceae   | <i>Cardamine</i>   | <i>Cardamine nipponica</i>     | AB365516 |
| Eudicotyledons | Fabaceae       | <i>Caesalpinia</i> | <i>Caesalpinia macvaughii</i>  | DQ208836 |
| Eudicotyledons | Fabaceae       | <i>Caesalpinia</i> | <i>Caesalpinia macvaughii</i>  | DQ208837 |
| Eudicotyledons | Fabaceae       | <i>Caesalpinia</i> | <i>Caesalpinia macvaughii</i>  | DQ208838 |
| Eudicotyledons | Fabaceae       | <i>Caesalpinia</i> | <i>Caesalpinia macvaughii</i>  | DQ208839 |
| Eudicotyledons | Fabaceae       | <i>Caesalpinia</i> | <i>Caesalpinia macvaughii</i>  | DQ208840 |
| Eudicotyledons | Fabaceae       | <i>Caesalpinia</i> | <i>Caesalpinia macvaughii</i>  | DQ208841 |
| Eudicotyledons | Fabaceae       | <i>Caesalpinia</i> | <i>Caesalpinia macvaughii</i>  | DQ208842 |
| Eudicotyledons | Fabaceae       | <i>Caesalpinia</i> | <i>Caesalpinia macvaughii</i>  | DQ208843 |
| Eudicotyledons | Polygonaceae   | <i>Persicaria</i>  | <i>Persicaria nepalensis</i>   | EF653742 |
| Eudicotyledons | Polygonaceae   | <i>Persicaria</i>  | <i>Persicaria nepalensis</i>   | JN046437 |
| Eudicotyledons | Polygonaceae   | <i>Persicaria</i>  | <i>Persicaria nepalensis</i>   | JN046438 |
| Eudicotyledons | Polygonaceae   | <i>Persicaria</i>  | <i>Persicaria nepalensis</i>   | JN046439 |

|                |               |                     |                                   |          |
|----------------|---------------|---------------------|-----------------------------------|----------|
| Eudicotyledons | Rubiaceae     | <i>Hedyotis</i>     | <i>Hedyotis auricularia</i>       | JF699765 |
| Eudicotyledons | Rubiaceae     | <i>Hedyotis</i>     | <i>Hedyotis auricularia</i>       | JF699766 |
| Eudicotyledons | Rubiaceae     | <i>Hedyotis</i>     | <i>Hedyotis auricularia</i>       | JN044758 |
| Eudicotyledons | Rubiaceae     | <i>Hedyotis</i>     | <i>Hedyotis auricularia</i>       | JN044759 |
| Eudicotyledons | Orobanchaceae | <i>Agalinis</i>     | <i>Agalinis decemloba</i>         | GU943533 |
| Eudicotyledons | Orobanchaceae | <i>Agalinis</i>     | <i>Agalinis decemloba</i>         | GU943534 |
| Eudicotyledons | Orobanchaceae | <i>Agalinis</i>     | <i>Agalinis decemloba</i>         | GU943535 |
| Eudicotyledons | Orobanchaceae | <i>Agalinis</i>     | <i>Agalinis decemloba</i>         | EU827899 |
| Eudicotyledons | Orobanchaceae | <i>Agalinis</i>     | <i>Agalinis decemloba</i>         | EU827900 |
| Eudicotyledons | Orobanchaceae | <i>Agalinis</i>     | <i>Agalinis skinneriana</i>       | EU827947 |
| Eudicotyledons | Orobanchaceae | <i>Agalinis</i>     | <i>Agalinis skinneriana</i>       | EU827948 |
| Eudicotyledons | Orobanchaceae | <i>Agalinis</i>     | <i>Agalinis skinneriana</i>       | EU827949 |
| Eudicotyledons | Brassicaceae  | <i>Cardamine</i>    | <i>Cardamine tangutorum</i>       | JN044169 |
| Eudicotyledons | Brassicaceae  | <i>Cardamine</i>    | <i>Cardamine tangutorum</i>       | JN044170 |
| Eudicotyledons | Brassicaceae  | <i>Cardamine</i>    | <i>Cardamine tangutorum</i>       | JN044171 |
| Eudicotyledons | Brassicaceae  | <i>Cardamine</i>    | <i>Cardamine tangutorum</i>       | JN044172 |
| Eudicotyledons | Gesneriaceae  | <i>Cyrtandra</i>    | <i>Cyrtandra anthropophagorum</i> | GQ475119 |
| Eudicotyledons | Gesneriaceae  | <i>Cyrtandra</i>    | <i>Cyrtandra anthropophagorum</i> | GQ475120 |
| Eudicotyledons | Gesneriaceae  | <i>Cyrtandra</i>    | <i>Cyrtandra anthropophagorum</i> | EU920042 |
| Eudicotyledons | Gesneriaceae  | <i>Cyrtandra</i>    | <i>Cyrtandra munroi</i>           | GQ475134 |
| Eudicotyledons | Gesneriaceae  | <i>Cyrtandra</i>    | <i>Cyrtandra munroi</i>           | GQ475155 |
| Eudicotyledons | Primulaceae   | <i>Primula</i>      | <i>Primula moupinensis</i>        | JN046538 |
| Eudicotyledons | Primulaceae   | <i>Primula</i>      | <i>Primula moupinensis</i>        | JN046539 |
| Eudicotyledons | Primulaceae   | <i>Primula</i>      | <i>Primula moupinensis</i>        | JN046540 |
| Eudicotyledons | Primulaceae   | <i>Primula</i>      | <i>Primula moupinensis</i>        | JN046541 |
| Eudicotyledons | Primulaceae   | <i>Primula</i>      | <i>Primula moupinensis</i>        | JN046542 |
| Eudicotyledons | Gentianaceae  | <i>Gentianopsis</i> | <i>Gentianopsis macrantha</i>     | HM460859 |
| Eudicotyledons | Gentianaceae  | <i>Gentianopsis</i> | <i>Gentianopsis macrantha</i>     | HM460860 |
| Eudicotyledons | Gentianaceae  | <i>Gentianopsis</i> | <i>Gentianopsis macrantha</i>     | HM460861 |
| Eudicotyledons | Gentianaceae  | <i>Gentianopsis</i> | <i>Gentianopsis thermalis</i>     | HM460862 |
| Eudicotyledons | Gentianaceae  | <i>Gentianopsis</i> | <i>Gentianopsis thermalis</i>     | HM460863 |
| Eudicotyledons | Gentianaceae  | <i>Gentianopsis</i> | <i>Gentianopsis thermalis</i>     | HM460864 |
| Eudicotyledons | Apiaceae      | <i>Peucedanum</i>   | <i>Peucedanum medicum</i>         | JN046225 |
| Eudicotyledons | Apiaceae      | <i>Peucedanum</i>   | <i>Peucedanum medicum</i>         | JN046226 |
| Eudicotyledons | Apiaceae      | <i>Peucedanum</i>   | <i>Peucedanum medicum</i>         | JN046227 |
| Eudicotyledons | Apiaceae      | <i>Peucedanum</i>   | <i>Peucedanum medicum</i>         | JN046228 |
| Eudicotyledons | Loranthaceae  | <i>Helixanthera</i> | <i>Helixanthera parasitica</i>    | HQ317802 |
| Eudicotyledons | Loranthaceae  | <i>Helixanthera</i> | <i>Helixanthera parasitica</i>    | HQ317803 |
| Eudicotyledons | Loranthaceae  | <i>Helixanthera</i> | <i>Helixanthera parasitica</i>    | HQ317804 |
| Eudicotyledons | Loranthaceae  | <i>Helixanthera</i> | <i>Helixanthera parasitica</i>    | HQ317805 |
| Eudicotyledons | Loranthaceae  | <i>Helixanthera</i> | <i>Helixanthera parasitica</i>    | JN687573 |
| Eudicotyledons | Melanthaceae  | <i>Melianthus</i>   | <i>Melianthus comosus</i>         | DQ435427 |
| Eudicotyledons | Melanthaceae  | <i>Melianthus</i>   | <i>Melianthus comosus</i>         | DQ435428 |
| Eudicotyledons | Melanthaceae  | <i>Melianthus</i>   | <i>Melianthus comosus</i>         | DQ435429 |
| Eudicotyledons | Melanthaceae  | <i>Melianthus</i>   | <i>Melianthus comosus</i>         | DQ435430 |
| Eudicotyledons | Melanthaceae  | <i>Melianthus</i>   | <i>Melianthus comosus</i>         | DQ435431 |
| Eudicotyledons | Melanthaceae  | <i>Melianthus</i>   | <i>Melianthus pectinatus</i>      | DQ435434 |
| Eudicotyledons | Melanthaceae  | <i>Melianthus</i>   | <i>Melianthus pectinatus</i>      | DQ435435 |
| Eudicotyledons | Asteraceae    | <i>Blumea</i>       | <i>Blumea fistulosa</i>           | EU195589 |
| Eudicotyledons | Asteraceae    | <i>Blumea</i>       | <i>Blumea fistulosa</i>           | EF210984 |
| Eudicotyledons | Malvaceae     | <i>Malva</i>        | <i>Malva alcea</i>                | GQ248337 |
| Eudicotyledons | Malvaceae     | <i>Malva</i>        | <i>Malva alcea</i>                | EF419609 |
| Eudicotyledons | Malvaceae     | <i>Malva</i>        | <i>Malva alcea</i>                | EF419610 |

|                |                 |                     |                                    |          |
|----------------|-----------------|---------------------|------------------------------------|----------|
| Eudicotyledons | Malvaceae       | <i>Malva</i>        | <i>Malva alcea</i>                 | EF419611 |
| Eudicotyledons | Malvaceae       | <i>Malva</i>        | <i>Malva alcea</i>                 | EF590713 |
| Eudicotyledons | Malvaceae       | <i>Malva</i>        | <i>Malva alcea</i>                 | HM214493 |
| Eudicotyledons | Malvaceae       | <i>Malva</i>        | <i>Malva alcea</i>                 | HM214494 |
| Eudicotyledons | Malvaceae       | <i>Malva</i>        | <i>Malva alcea</i>                 | HM214495 |
| Eudicotyledons | Malvaceae       | <i>Malva</i>        | <i>Malva alcea</i>                 | HM214496 |
| Eudicotyledons | Malvaceae       | <i>Malva</i>        | <i>Malva alcea</i>                 | HM214497 |
| Eudicotyledons | Malvaceae       | <i>Malva</i>        | <i>Malva alcea</i>                 | HM214498 |
| Eudicotyledons | Malvaceae       | <i>Malva</i>        | <i>Malva alcea</i>                 | HM214499 |
| Eudicotyledons | Malvaceae       | <i>Malva</i>        | <i>Malva alcea</i>                 | HM214500 |
| Eudicotyledons | Malvaceae       | <i>Malva</i>        | <i>Malva alcea</i>                 | HM214501 |
| Eudicotyledons | Malvaceae       | <i>Malva</i>        | <i>Malva alcea</i>                 | HM214502 |
| Eudicotyledons | Malvaceae       | <i>Malva</i>        | <i>Malva alcea</i>                 | HM214503 |
| Eudicotyledons | Malvaceae       | <i>Malva</i>        | <i>Malva alcea</i>                 | HM214504 |
| Eudicotyledons | Malvaceae       | <i>Malva</i>        | <i>Malva alcea</i>                 | HM214505 |
| Eudicotyledons | Malvaceae       | <i>Malva</i>        | <i>Malva hispanica</i>             | EF419606 |
| Eudicotyledons | Malvaceae       | <i>Malva</i>        | <i>Malva hispanica</i>             | EF419607 |
| Eudicotyledons | Malvaceae       | <i>Malva</i>        | <i>Malva hispanica</i>             | EF419608 |
| Eudicotyledons | Loranthaceae    | <i>Helixanthera</i> | <i>Helixanthera sampsonii</i>      | HQ317806 |
| Eudicotyledons | Loranthaceae    | <i>Helixanthera</i> | <i>Helixanthera sampsonii</i>      | HQ317807 |
| Eudicotyledons | Asteraceae      | <i>Sinosenecio</i>  | <i>Sinosenecio cyclaminifolius</i> | JN047133 |
| Eudicotyledons | Asteraceae      | <i>Sinosenecio</i>  | <i>Sinosenecio cyclaminifolius</i> | JN047134 |
| Eudicotyledons | Asteraceae      | <i>Sinosenecio</i>  | <i>Sinosenecio cyclaminifolius</i> | JN047135 |
| Gymnosperms    | Pinaceae        | <i>Picea</i>        | <i>Picea abies</i>                 | FR832550 |
| Gymnosperms    | Pinaceae        | <i>Picea</i>        | <i>Picea abies</i>                 | FR832551 |
| Gymnosperms    | Pinaceae        | <i>Picea</i>        | <i>Picea abies</i>                 | FR832552 |
| Gymnosperms    | Pinaceae        | <i>Picea</i>        | <i>Picea abies</i>                 | FJ493294 |
| Gymnosperms    | Pinaceae        | <i>Picea</i>        | <i>Picea abies</i>                 | HQ114857 |
| Gymnosperms    | Pinaceae        | <i>Picea</i>        | <i>Picea abies</i>                 | HQ114858 |
| Gymnosperms    | Pinaceae        | <i>Pinus</i>        | <i>Pinus nigra</i>                 | EU531715 |
| Gymnosperms    | Pinaceae        | <i>Pinus</i>        | <i>Pinus nigra</i>                 | FJ493295 |
| Gymnosperms    | Pinaceae        | <i>Pinus</i>        | <i>Pinus nigra</i>                 | FN689385 |
| Gymnosperms    | Pinaceae        | <i>Pinus</i>        | <i>Pinus halepensis</i>            | EU531714 |
| Gymnosperms    | Pinaceae        | <i>Pinus</i>        | <i>Pinus halepensis</i>            | FR832528 |
| Gymnosperms    | Pinaceae        | <i>Pinus</i>        | <i>Pinus halepensis</i>            | FR832529 |
| Gymnosperms    | Pinaceae        | <i>Pinus</i>        | <i>Pinus halepensis</i>            | FR832530 |
| Gymnosperms    | Pinaceae        | <i>Pinus</i>        | <i>Pinus halepensis</i>            | FR832531 |
| Gymnosperms    | Pinaceae        | <i>Pinus</i>        | <i>Pinus halepensis</i>            | FN689388 |
| Gymnosperms    | Podocarpaceae   | <i>Podocarpus</i>   | <i>Podocarpus matudae</i>          | HM036081 |
| Gymnosperms    | Podocarpaceae   | <i>Podocarpus</i>   | <i>Podocarpus matudae</i>          | HM036082 |
| Gymnosperms    | Podocarpaceae   | <i>Podocarpus</i>   | <i>Podocarpus matudae</i>          | HM036083 |
| Gymnosperms    | Podocarpaceae   | <i>Podocarpus</i>   | <i>Podocarpus matudae</i>          | HM036084 |
| Gymnosperms    | Podocarpaceae   | <i>Podocarpus</i>   | <i>Podocarpus matudae</i>          | HM036085 |
| Gymnosperms    | Podocarpaceae   | <i>Podocarpus</i>   | <i>Podocarpus matudae</i>          | HM036086 |
| Gymnosperms    | Podocarpaceae   | <i>Podocarpus</i>   | <i>Podocarpus matudae</i>          | HM036087 |
| Gymnosperms    | Podocarpaceae   | <i>Podocarpus</i>   | <i>Podocarpus matudae</i>          | HM036088 |
| Gymnosperms    | Podocarpaceae   | <i>Podocarpus</i>   | <i>Podocarpus matudae</i>          | HM036089 |
| Gymnosperms    | Podocarpaceae   | <i>Podocarpus</i>   | <i>Podocarpus matudae</i>          | HM036090 |
| Gymnosperms    | Podocarpaceae   | <i>Podocarpus</i>   | <i>Podocarpus matudae</i>          | HM036091 |
| Gymnosperms    | Cephalotaxaceae | <i>Cephalotaxus</i> | <i>Cephalotaxus mannii</i>         | GQ463521 |
| Gymnosperms    | Cephalotaxaceae | <i>Cephalotaxus</i> | <i>Cephalotaxus mannii</i>         | EF660675 |
| Gymnosperms    | Cephalotaxaceae | <i>Cephalotaxus</i> | <i>Cephalotaxus mannii</i>         | JN044249 |
| Gymnosperms    | Cephalotaxaceae | <i>Cephalotaxus</i> | <i>Cephalotaxus mannii</i>         | JN044250 |



|                |                  |                     |                                 |          |
|----------------|------------------|---------------------|---------------------------------|----------|
| Gymnosperms    | Cephalotaxaceae  | <i>Cephalotaxus</i> | <i>Cephalotaxus mannii</i>      | JN044251 |
| Gymnosperms    | Cephalotaxaceae  | <i>Cephalotaxus</i> | <i>Cephalotaxus mannii</i>      | JN044252 |
| Gymnosperms    | Cephalotaxaceae  | <i>Cephalotaxus</i> | <i>Cephalotaxus mannii</i>      | JN044253 |
| Gymnosperms    | Cephalotaxaceae  | <i>Cephalotaxus</i> | <i>Cephalotaxus mannii</i>      | JN044254 |
| Gymnosperms    | Cephalotaxaceae  | <i>Cephalotaxus</i> | <i>Cephalotaxus mannii</i>      | JN044255 |
| Gymnosperms    | Cephalotaxaceae  | <i>Cephalotaxus</i> | <i>Cephalotaxus mannii</i>      | JN044256 |
| Gymnosperms    | Cephalotaxaceae  | <i>Cephalotaxus</i> | <i>Cephalotaxus mannii</i>      | JN044257 |
| Monocotyledons | Potamogetonaceae | <i>Potamogeton</i>  | <i>Potamogeton gramineus</i>    | DQ786534 |
| Monocotyledons | Potamogetonaceae | <i>Potamogeton</i>  | <i>Potamogeton gramineus</i>    | EF174574 |
| Monocotyledons | Potamogetonaceae | <i>Potamogeton</i>  | <i>Potamogeton gramineus</i>    | FN668445 |
| Monocotyledons | Orchidaceae      | <i>Cymbidium</i>    | <i>Cymbidium ensifolium</i>     | FJ527765 |
| Monocotyledons | Orchidaceae      | <i>Cymbidium</i>    | <i>Cymbidium ensifolium</i>     | FJ527766 |
| Monocotyledons | Asparagaceae     | <i>Polygonatum</i>  | <i>Polygonatum cirrhifolium</i> | EU850212 |
| Monocotyledons | Asparagaceae     | <i>Polygonatum</i>  | <i>Polygonatum cirrhifolium</i> | JN046400 |
| Monocotyledons | Asparagaceae     | <i>Polygonatum</i>  | <i>Polygonatum cirrhifolium</i> | JN046401 |
| Monocotyledons | Asparagaceae     | <i>Polygonatum</i>  | <i>Polygonatum cirrhifolium</i> | JN046402 |
| Monocotyledons | Asparagaceae     | <i>Polygonatum</i>  | <i>Polygonatum cirrhifolium</i> | JN046403 |
| Monocotyledons | Asparagaceae     | <i>Polygonatum</i>  | <i>Polygonatum cirrhifolium</i> | JN046404 |
| Monocotyledons | Asparagaceae     | <i>Polygonatum</i>  | <i>Polygonatum cirrhifolium</i> | JN046405 |
| Monocotyledons | Asparagaceae     | <i>Polygonatum</i>  | <i>Polygonatum cirrhifolium</i> | JN046406 |
| Monocotyledons | Asparagaceae     | <i>Polygonatum</i>  | <i>Polygonatum cirrhifolium</i> | JN046407 |
| Monocotyledons | Asparagaceae     | <i>Polygonatum</i>  | <i>Polygonatum cirrhifolium</i> | JN046408 |
| Monocotyledons | Asparagaceae     | <i>Polygonatum</i>  | <i>Polygonatum cirrhifolium</i> | JN046409 |
| Monocotyledons | Asparagaceae     | <i>Polygonatum</i>  | <i>Polygonatum cirrhifolium</i> | JN046410 |
| Monocotyledons | Asparagaceae     | <i>Polygonatum</i>  | <i>Polygonatum cirrhifolium</i> | JN046411 |
| Monocotyledons | Asparagaceae     | <i>Polygonatum</i>  | <i>Polygonatum cirrhifolium</i> | JN046412 |
| Monocotyledons | Arecaceae        | <i>Wallichia</i>    | <i>Wallichia disticha</i>       | JF345073 |
| Monocotyledons | Arecaceae        | <i>Wallichia</i>    | <i>Wallichia disticha</i>       | JF345074 |
| Monocotyledons | Arecaceae        | <i>Arenga</i>       | <i>Arenga caudata</i>           | JF345007 |
| Monocotyledons | Arecaceae        | <i>Arenga</i>       | <i>Arenga caudata</i>           | JF345008 |
| Monocotyledons | Arecaceae        | <i>Arenga</i>       | <i>Arenga caudata</i>           | JF345009 |
| Monocotyledons | Arecaceae        | <i>Arenga</i>       | <i>Arenga caudata</i>           | JF345010 |
| Monocotyledons | Arecaceae        | <i>Arenga</i>       | <i>Arenga caudata</i>           | JF345011 |
| Monocotyledons | Arecaceae        | <i>Arenga</i>       | <i>Arenga caudata</i>           | JF345012 |
| Monocotyledons | Arecaceae        | <i>Arenga</i>       | <i>Arenga caudata</i>           | JF345013 |
| Monocotyledons | Arecaceae        | <i>Arenga</i>       | <i>Arenga caudata</i>           | JF345014 |
| Monocotyledons | Arecaceae        | <i>Arenga</i>       | <i>Arenga caudata</i>           | JF345015 |
| Monocotyledons | Arecaceae        | <i>Arenga</i>       | <i>Arenga caudata</i>           | JF345016 |
| Monocotyledons | Arecaceae        | <i>Arenga</i>       | <i>Arenga undulatifolia</i>     | JF345039 |
| Monocotyledons | Arecaceae        | <i>Arenga</i>       | <i>Arenga undulatifolia</i>     | JF345040 |
| Monocotyledons | Araceae          | <i>Wolffia</i>      | <i>Wolffia brasiliensis</i>     | GU454557 |
| Monocotyledons | Araceae          | <i>Wolffia</i>      | <i>Wolffia brasiliensis</i>     | GU454558 |
| Monocotyledons | Araceae          | <i>Wolffia</i>      | <i>Wolffia brasiliensis</i>     | GU454559 |
| Monocotyledons | Araceae          | <i>Wolffia</i>      | <i>Wolffia columbiana</i>       | GU454560 |
| Monocotyledons | Araceae          | <i>Wolffia</i>      | <i>Wolffia columbiana</i>       | GU454561 |
| Monocotyledons | Araceae          | <i>Wolffia</i>      | <i>Wolffia columbiana</i>       | GU454562 |
| Monocotyledons | Araceae          | <i>Wolffia</i>      | <i>Wolffia columbiana</i>       | GU454563 |
| Monocotyledons | Araceae          | <i>Wolffia</i>      | <i>Wolffia columbiana</i>       | GU454564 |
| Monocotyledons | Araceae          | <i>Wolffia</i>      | <i>Wolffia columbiana</i>       | HQ596901 |
| Monocotyledons | Araceae          | <i>Wolffiella</i>   | <i>Wolffiella oblonga</i>       | GU454545 |
| Monocotyledons | Araceae          | <i>Wolffiella</i>   | <i>Wolffiella oblonga</i>       | GU454546 |
| Monocotyledons | Araceae          | <i>Wolffiella</i>   | <i>Wolffiella oblonga</i>       | GU454547 |
| Monocotyledons | Araceae          | <i>Wolffiella</i>   | <i>Wolffiella oblonga</i>       | GU454548 |

|                |                  |                   |                               |          |
|----------------|------------------|-------------------|-------------------------------|----------|
| Monocotyledons | Araceae          | <i>Wolffiella</i> | <i>Wolffiella oblonga</i>     | GU454549 |
| Monocotyledons | Bromeliaceae     | <i>Aechmea</i>    | <i>Aechmea lingulata</i>      | EF110667 |
| Monocotyledons | Bromeliaceae     | <i>Aechmea</i>    | <i>Aechmea lingulata</i>      | JN204616 |
| Monocotyledons | Bromeliaceae     | <i>Aechmea</i>    | <i>Aechmea lingulata</i>      | JN204617 |
| Monocotyledons | Bromeliaceae     | <i>Aechmea</i>    | <i>Aechmea lingulata</i>      | HQ913652 |
| Monocotyledons | Hydrocharitaceae | <i>Najas</i>      | <i>Najas graminea</i>         | HQ687174 |
| Monocotyledons | Hydrocharitaceae | <i>Najas</i>      | <i>Najas graminea</i>         | HQ687175 |
| Monocotyledons | Hydrocharitaceae | <i>Najas</i>      | <i>Najas graminea</i>         | HQ687176 |
| Monocotyledons | Hydrocharitaceae | <i>Najas</i>      | <i>Najas graminea</i>         | HQ687177 |
| Monocotyledons | Hydrocharitaceae | <i>Najas</i>      | <i>Najas graminea</i>         | HQ687178 |
| Monocotyledons | Hydrocharitaceae | <i>Najas</i>      | <i>Najas graminea</i>         | HQ687179 |
| Monocotyledons | Bromeliaceae     | <i>Billbergia</i> | <i>Billbergia euphemiae</i>   | JN204630 |
| Monocotyledons | Bromeliaceae     | <i>Billbergia</i> | <i>Billbergia euphemiae</i>   | JN204631 |
| Monocotyledons | Bromeliaceae     | <i>Billbergia</i> | <i>Billbergia euphemiae</i>   | JN204632 |
| Monocotyledons | Bromeliaceae     | <i>Aechmea</i>    | <i>Aechmea bromeliifolia</i>  | JN204601 |
| Monocotyledons | Bromeliaceae     | <i>Aechmea</i>    | <i>Aechmea bromeliifolia</i>  | JN204602 |
| Monocotyledons | Bromeliaceae     | <i>Aechmea</i>    | <i>Aechmea bromeliifolia</i>  | JN204603 |
| Monocotyledons | Bromeliaceae     | <i>Aechmea</i>    | <i>Aechmea bromeliifolia</i>  | HQ913649 |
| Monocotyledons | Bromeliaceae     | <i>Aechmea</i>    | <i>Aechmea coelestis</i>      | JN204608 |
| Monocotyledons | Bromeliaceae     | <i>Aechmea</i>    | <i>Aechmea coelestis</i>      | JN204609 |
| Monocotyledons | Bromeliaceae     | <i>Aechmea</i>    | <i>Aechmea recurvata</i>      | JN204625 |
| Monocotyledons | Bromeliaceae     | <i>Aechmea</i>    | <i>Aechmea recurvata</i>      | JN204626 |
| Monocotyledons | Bromeliaceae     | <i>Aechmea</i>    | <i>Aechmea recurvata</i>      | JN204627 |
| Monocotyledons | Arecaceae        | <i>Arenga</i>     | <i>Arenga engleri</i>         | JF345020 |
| Monocotyledons | Arecaceae        | <i>Arenga</i>     | <i>Arenga engleri</i>         | JF345021 |
| Monocotyledons | Arecaceae        | <i>Arenga</i>     | <i>Arenga engleri</i>         | JF345022 |
| Monocotyledons | Arecaceae        | <i>Arenga</i>     | <i>Arenga engleri</i>         | JF345023 |
| Monocotyledons | Arecaceae        | <i>Arenga</i>     | <i>Arenga obtusifolia</i>     | JF345032 |
| Monocotyledons | Arecaceae        | <i>Arenga</i>     | <i>Arenga obtusifolia</i>     | JF345033 |
| Monocotyledons | Arecaceae        | <i>Wallichia</i>  | <i>Wallichia gracilis</i>     | JF345072 |
| Monocotyledons | Arecaceae        | <i>Wallichia</i>  | <i>Wallichia gracilis</i>     | JF345075 |
| Monocotyledons | Arecaceae        | <i>Wallichia</i>  | <i>Wallichia gracilis</i>     | JF345076 |
| Monocotyledons | Bromeliaceae     | <i>Aechmea</i>    | <i>Aechmea caudata</i>        | JN204605 |
| Monocotyledons | Bromeliaceae     | <i>Aechmea</i>    | <i>Aechmea caudata</i>        | JN204606 |
| Monocotyledons | Bromeliaceae     | <i>Aechmea</i>    | <i>Aechmea caudata</i>        | JN204607 |
| Monocotyledons | Iridaceae        | <i>Iris</i>       | <i>Iris lactea</i>            | JN044989 |
| Monocotyledons | Iridaceae        | <i>Iris</i>       | <i>Iris lactea</i>            | JN044990 |
| Monocotyledons | Iridaceae        | <i>Iris</i>       | <i>Iris lactea</i>            | JN044991 |
| Monocotyledons | Iridaceae        | <i>Iris</i>       | <i>Iris lactea</i>            | JN044992 |
| Monocotyledons | Iridaceae        | <i>Iris</i>       | <i>Iris goniocarpa</i>        | JN044981 |
| Monocotyledons | Iridaceae        | <i>Iris</i>       | <i>Iris goniocarpa</i>        | JN044982 |
| Monocotyledons | Araceae          | <i>Lemna</i>      | <i>Lemna minor</i>            | GU454511 |
| Monocotyledons | Araceae          | <i>Lemna</i>      | <i>Lemna minor</i>            | GU454512 |
| Monocotyledons | Araceae          | <i>Lemna</i>      | <i>Lemna minor</i>            | GU454513 |
| Monocotyledons | Araceae          | <i>Lemna</i>      | <i>Lemna minor</i>            | GU454514 |
| Monocotyledons | Araceae          | <i>Lemna</i>      | <i>Lemna minor</i>            | GU454515 |
| Monocotyledons | Araceae          | <i>Lemna</i>      | <i>Lemna minor</i>            | GU454516 |
| Monocotyledons | Araceae          | <i>Lemna</i>      | <i>Lemna minor</i>            | FJ395556 |
| Monocotyledons | Araceae          | <i>Lemna</i>      | <i>Lemna minor</i>            | GQ434996 |
| Monocotyledons | Poaceae          | <i>Thinopyrum</i> | <i>Thinopyrum intermedium</i> | HQ221771 |
| Monocotyledons | Poaceae          | <i>Thinopyrum</i> | <i>Thinopyrum intermedium</i> | HQ221772 |
| Monocotyledons | Poaceae          | <i>Thinopyrum</i> | <i>Thinopyrum intermedium</i> | HQ221773 |
| Monocotyledons | Poaceae          | <i>Thinopyrum</i> | <i>Thinopyrum intermedium</i> | HQ221774 |

|                |              |                   |                               |          |
|----------------|--------------|-------------------|-------------------------------|----------|
| Monocotyledons | Poaceae      | <i>Thinopyrum</i> | <i>Thinopyrum intermedium</i> | HQ221775 |
| Monocotyledons | Poaceae      | <i>Thinopyrum</i> | <i>Thinopyrum intermedium</i> | HQ221776 |
| Monocotyledons | Poaceae      | <i>Thinopyrum</i> | <i>Thinopyrum intermedium</i> | HQ221777 |
| Monocotyledons | Poaceae      | <i>Thinopyrum</i> | <i>Thinopyrum intermedium</i> | HQ221778 |
| Monocotyledons | Poaceae      | <i>Thinopyrum</i> | <i>Thinopyrum intermedium</i> | HQ221779 |
| Monocotyledons | Poaceae      | <i>Thinopyrum</i> | <i>Thinopyrum intermedium</i> | HQ221780 |
| Monocotyledons | Poaceae      | <i>Thinopyrum</i> | <i>Thinopyrum intermedium</i> | HQ221781 |
| Monocotyledons | Poaceae      | <i>Thinopyrum</i> | <i>Thinopyrum intermedium</i> | HQ221782 |
| Monocotyledons | Poaceae      | <i>Thinopyrum</i> | <i>Thinopyrum intermedium</i> | HQ221783 |
| Monocotyledons | Poaceae      | <i>Thinopyrum</i> | <i>Thinopyrum intermedium</i> | HQ221784 |
| Monocotyledons | Poaceae      | <i>Thinopyrum</i> | <i>Thinopyrum intermedium</i> | HQ221785 |
| Monocotyledons | Poaceae      | <i>Thinopyrum</i> | <i>Thinopyrum intermedium</i> | HQ221786 |
| Monocotyledons | Poaceae      | <i>Thinopyrum</i> | <i>Thinopyrum intermedium</i> | HQ221787 |
| Monocotyledons | Poaceae      | <i>Thinopyrum</i> | <i>Thinopyrum intermedium</i> | HQ221788 |
| Monocotyledons | Poaceae      | <i>Thinopyrum</i> | <i>Thinopyrum intermedium</i> | HQ221790 |
| Monocotyledons | Poaceae      | <i>Thinopyrum</i> | <i>Thinopyrum intermedium</i> | HQ221792 |
| Monocotyledons | Poaceae      | <i>Thinopyrum</i> | <i>Thinopyrum intermedium</i> | HQ221793 |
| Monocotyledons | Poaceae      | <i>Thinopyrum</i> | <i>Thinopyrum intermedium</i> | HQ221794 |
| Monocotyledons | Poaceae      | <i>Thinopyrum</i> | <i>Thinopyrum intermedium</i> | HQ221795 |
| Monocotyledons | Poaceae      | <i>Thinopyrum</i> | <i>Thinopyrum intermedium</i> | HQ221796 |
| Monocotyledons | Poaceae      | <i>Thinopyrum</i> | <i>Thinopyrum intermedium</i> | HQ221797 |
| Monocotyledons | Poaceae      | <i>Thinopyrum</i> | <i>Thinopyrum intermedium</i> | HQ221798 |
| Monocotyledons | Poaceae      | <i>Thinopyrum</i> | <i>Thinopyrum intermedium</i> | HQ221799 |
| Monocotyledons | Poaceae      | <i>Thinopyrum</i> | <i>Thinopyrum intermedium</i> | HQ221800 |
| Monocotyledons | Poaceae      | <i>Thinopyrum</i> | <i>Thinopyrum intermedium</i> | HQ221801 |
| Monocotyledons | Poaceae      | <i>Thinopyrum</i> | <i>Thinopyrum intermedium</i> | HQ221802 |
| Monocotyledons | Poaceae      | <i>Thinopyrum</i> | <i>Thinopyrum intermedium</i> | HQ221803 |
| Monocotyledons | Poaceae      | <i>Thinopyrum</i> | <i>Thinopyrum intermedium</i> | HQ221804 |
| Monocotyledons | Poaceae      | <i>Thinopyrum</i> | <i>Thinopyrum intermedium</i> | HQ221805 |
| Monocotyledons | Poaceae      | <i>Thinopyrum</i> | <i>Thinopyrum intermedium</i> | HQ221806 |
| Monocotyledons | Orchidaceae  | <i>Oncidium</i>   | <i>Oncidium poikilostalix</i> | FJ564029 |
| Monocotyledons | Orchidaceae  | <i>Oncidium</i>   | <i>Oncidium poikilostalix</i> | FJ564660 |
| Monocotyledons | Orchidaceae  | <i>Oncidium</i>   | <i>Oncidium cirrhosum</i>     | FJ564032 |
| Monocotyledons | Orchidaceae  | <i>Oncidium</i>   | <i>Oncidium cirrhosum</i>     | FJ564180 |
| Monocotyledons | Orchidaceae  | <i>Oncidium</i>   | <i>Oncidium cirrhosum</i>     | FJ564569 |
| Monocotyledons | Orchidaceae  | <i>Oncidium</i>   | <i>Oncidium hallii</i>        | FJ563973 |
| Monocotyledons | Orchidaceae  | <i>Oncidium</i>   | <i>Oncidium hallii</i>        | FJ564159 |
| Monocotyledons | Orchidaceae  | <i>Oncidium</i>   | <i>Oncidium retusum</i>       | FJ564005 |
| Monocotyledons | Orchidaceae  | <i>Oncidium</i>   | <i>Oncidium retusum</i>       | FJ564215 |
| Monocotyledons | Orchidaceae  | <i>Oncidium</i>   | <i>Oncidium retusum</i>       | FJ564578 |
| Monocotyledons | Orchidaceae  | <i>Oncidium</i>   | <i>Oncidium retusum</i>       | FJ564580 |
| Monocotyledons | Orchidaceae  | <i>Oncidium</i>   | <i>Oncidium tigroides</i>     | FJ564548 |
| Monocotyledons | Orchidaceae  | <i>Oncidium</i>   | <i>Oncidium tigroides</i>     | FJ564570 |
| Monocotyledons | Araceae      | <i>Lemna</i>      | <i>Lemna trisulca</i>         | GU454521 |
| Monocotyledons | Araceae      | <i>Lemna</i>      | <i>Lemna trisulca</i>         | GU454522 |
| Monocotyledons | Araceae      | <i>Lemna</i>      | <i>Lemna trisulca</i>         | GU454523 |
| Monocotyledons | Asparagaceae | <i>Asparagus</i>  | <i>Asparagus officinalis</i>  | HM990123 |
| Monocotyledons | Asparagaceae | <i>Asparagus</i>  | <i>Asparagus officinalis</i>  | HM990126 |
| Monocotyledons | Asparagaceae | <i>Asparagus</i>  | <i>Asparagus officinalis</i>  | HM990127 |
| Monocotyledons | Asparagaceae | <i>Asparagus</i>  | <i>Asparagus officinalis</i>  | HM990129 |
| Monocotyledons | Asparagaceae | <i>Asparagus</i>  | <i>Asparagus officinalis</i>  | HM990131 |
| Monocotyledons | Asparagaceae | <i>Asparagus</i>  | <i>Asparagus officinalis</i>  | HM990132 |
| Monocotyledons | Asparagaceae | <i>Asparagus</i>  | <i>Asparagus officinalis</i>  | HM990133 |

|                |               |                  |                              |          |
|----------------|---------------|------------------|------------------------------|----------|
| Monocotyledons | Asparagaceae  | <i>Asparagus</i> | <i>Asparagus officinalis</i> | HM990134 |
| Monocotyledons | Asparagaceae  | <i>Asparagus</i> | <i>Asparagus officinalis</i> | HM990135 |
| Monocotyledons | Asparagaceae  | <i>Asparagus</i> | <i>Asparagus officinalis</i> | HM990136 |
| Monocotyledons | Asparagaceae  | <i>Asparagus</i> | <i>Asparagus officinalis</i> | HM990137 |
| Monocotyledons | Asparagaceae  | <i>Asparagus</i> | <i>Asparagus officinalis</i> | HM990139 |
| Monocotyledons | Asparagaceae  | <i>Asparagus</i> | <i>Asparagus officinalis</i> | HM990142 |
| Monocotyledons | Asparagaceae  | <i>Asparagus</i> | <i>Asparagus officinalis</i> | HM990143 |
| Monocotyledons | Asparagaceae  | <i>Asparagus</i> | <i>Asparagus officinalis</i> | HM990144 |
| Monocotyledons | Asparagaceae  | <i>Asparagus</i> | <i>Asparagus officinalis</i> | HM990146 |
| Monocotyledons | Asparagaceae  | <i>Asparagus</i> | <i>Asparagus officinalis</i> | HM990147 |
| Monocotyledons | Poaceae       | <i>Festuca</i>   | <i>Festuca idahoensis</i>    | DQ369764 |
| Monocotyledons | Poaceae       | <i>Festuca</i>   | <i>Festuca idahoensis</i>    | DQ369766 |
| Monocotyledons | Poaceae       | <i>Festuca</i>   | <i>Festuca idahoensis</i>    | DQ369770 |
| Monocotyledons | Poaceae       | <i>Festuca</i>   | <i>Festuca idahoensis</i>    | DQ369774 |
| Monocotyledons | Poaceae       | <i>Festuca</i>   | <i>Festuca idahoensis</i>    | DQ369778 |
| Monocotyledons | Melanthiaceae | <i>Paris</i>     | <i>Paris luquanensis</i>     | GU178892 |
| Monocotyledons | Melanthiaceae | <i>Paris</i>     | <i>Paris luquanensis</i>     | JN045726 |
| Monocotyledons | Melanthiaceae | <i>Paris</i>     | <i>Paris luquanensis</i>     | JN045727 |
| Monocotyledons | Melanthiaceae | <i>Paris</i>     | <i>Paris luquanensis</i>     | JN045728 |
| Monocotyledons | Melanthiaceae | <i>Paris</i>     | <i>Paris marmorata</i>       | DQ404256 |
| Monocotyledons | Melanthiaceae | <i>Paris</i>     | <i>Paris marmorata</i>       | GU178890 |
| Monocotyledons | Melanthiaceae | <i>Paris</i>     | <i>Paris marmorata</i>       | JN045735 |
| Monocotyledons | Melanthiaceae | <i>Paris</i>     | <i>Paris marmorata</i>       | JN045736 |
| Monocotyledons | Melanthiaceae | <i>Paris</i>     | <i>Paris marmorata</i>       | JN045737 |
| Monocotyledons | Melanthiaceae | <i>Paris</i>     | <i>Paris marmorata</i>       | JN045738 |
| Monocotyledons | Melanthiaceae | <i>Paris</i>     | <i>Paris marmorata</i>       | JN045739 |
| Monocotyledons | Poaceae       | <i>Festuca</i>   | <i>Festuca roemeri</i>       | DQ369768 |
| Monocotyledons | Poaceae       | <i>Festuca</i>   | <i>Festuca roemeri</i>       | DQ369772 |
| Monocotyledons | Poaceae       | <i>Festuca</i>   | <i>Festuca roemeri</i>       | DQ369780 |
| Monocotyledons | Poaceae       | <i>Festuca</i>   | <i>Festuca roemeri</i>       | DQ369782 |
| Monocotyledons | Poaceae       | <i>Festuca</i>   | <i>Festuca roemeri</i>       | DQ369784 |
| Monocotyledons | Poaceae       | <i>Festuca</i>   | <i>Festuca roemeri</i>       | DQ369786 |
| Monocotyledons | Poaceae       | <i>Festuca</i>   | <i>Festuca roemeri</i>       | DQ369788 |
| Monocotyledons | Poaceae       | <i>Festuca</i>   | <i>Festuca roemeri</i>       | DQ369790 |
| Monocotyledons | Melanthiaceae | <i>Paris</i>     | <i>Paris delavayi</i>        | GU178891 |
| Monocotyledons | Melanthiaceae | <i>Paris</i>     | <i>Paris delavayi</i>        | JN045706 |
| Monocotyledons | Melanthiaceae | <i>Paris</i>     | <i>Paris delavayi</i>        | JN045707 |
| Monocotyledons | Melanthiaceae | <i>Paris</i>     | <i>Paris delavayi</i>        | JN045708 |
| Monocotyledons | Melanthiaceae | <i>Paris</i>     | <i>Paris delavayi</i>        | JN045709 |
| Monocotyledons | Melanthiaceae | <i>Paris</i>     | <i>Paris delavayi</i>        | JN045710 |
| Monocotyledons | Melanthiaceae | <i>Paris</i>     | <i>Paris delavayi</i>        | JN045711 |
| Monocotyledons | Melanthiaceae | <i>Paris</i>     | <i>Paris mairei</i>          | DQ404247 |
| Monocotyledons | Melanthiaceae | <i>Paris</i>     | <i>Paris mairei</i>          | JN045729 |
| Monocotyledons | Melanthiaceae | <i>Paris</i>     | <i>Paris mairei</i>          | JN045730 |
| Monocotyledons | Melanthiaceae | <i>Paris</i>     | <i>Paris mairei</i>          | JN045731 |
| Monocotyledons | Melanthiaceae | <i>Paris</i>     | <i>Paris mairei</i>          | JN045732 |
| Monocotyledons | Melanthiaceae | <i>Paris</i>     | <i>Paris mairei</i>          | JN045733 |
| Monocotyledons | Melanthiaceae | <i>Paris</i>     | <i>Paris mairei</i>          | JN045734 |
| Monocotyledons | Melanthiaceae | <i>Paris</i>     | <i>Paris vietnamensis</i>    | DQ404246 |
| Monocotyledons | Melanthiaceae | <i>Paris</i>     | <i>Paris vietnamensis</i>    | GU178893 |
| Monocotyledons | Melanthiaceae | <i>Paris</i>     | <i>Paris vietnamensis</i>    | JN045775 |
| Monocotyledons | Melanthiaceae | <i>Paris</i>     | <i>Paris vietnamensis</i>    | JN045776 |
| Monocotyledons | Melanthiaceae | <i>Paris</i>     | <i>Paris vietnamensis</i>    | JN045777 |

|                |               |                   |                            |          |
|----------------|---------------|-------------------|----------------------------|----------|
| Monocotyledons | Melanthiaceae | <i>Paris</i>      | <i>Paris vietnamensis</i>  | JN045778 |
| Monocotyledons | Melanthiaceae | <i>Paris</i>      | <i>Paris vietnamensis</i>  | JN045779 |
| Monocotyledons | Melanthiaceae | <i>Paris</i>      | <i>Paris vietnamensis</i>  | JN045780 |
| Monocotyledons | Melanthiaceae | <i>Veratrum</i>   | <i>Veratrum oxysepalum</i> | JF807759 |
| Monocotyledons | Melanthiaceae | <i>Veratrum</i>   | <i>Veratrum oxysepalum</i> | JF807760 |
| Monocotyledons | Melanthiaceae | <i>Veratrum</i>   | <i>Veratrum oxysepalum</i> | JF807761 |
| Monocotyledons | Melanthiaceae | <i>Veratrum</i>   | <i>Veratrum oxysepalum</i> | JF807762 |
| Monocotyledons | Melanthiaceae | <i>Veratrum</i>   | <i>Veratrum oxysepalum</i> | JF807763 |
| Monocotyledons | Melanthiaceae | <i>Veratrum</i>   | <i>Veratrum oxysepalum</i> | JF807764 |
| Monocotyledons | Melanthiaceae | <i>Veratrum</i>   | <i>Veratrum oxysepalum</i> | JF807765 |
| Monocotyledons | Melanthiaceae | <i>Veratrum</i>   | <i>Veratrum oxysepalum</i> | JF807766 |
| Monocotyledons | Melanthiaceae | <i>Veratrum</i>   | <i>Veratrum oxysepalum</i> | JF807767 |
| Monocotyledons | Melanthiaceae | <i>Veratrum</i>   | <i>Veratrum oxysepalum</i> | JF807768 |
| Monocotyledons | Melanthiaceae | <i>Veratrum</i>   | <i>Veratrum oxysepalum</i> | JF807769 |
| Monocotyledons | Melanthiaceae | <i>Veratrum</i>   | <i>Veratrum oxysepalum</i> | JF807770 |
| Monocotyledons | Melanthiaceae | <i>Veratrum</i>   | <i>Veratrum oxysepalum</i> | JF807771 |
| Monocotyledons | Heliconiaceae | <i>Heliconia</i>  | <i>Heliconia bihai</i>     | GQ248311 |
| Monocotyledons | Heliconiaceae | <i>Heliconia</i>  | <i>Heliconia bihai</i>     | EF590700 |
| Monocotyledons | Heliconiaceae | <i>Heliconia</i>  | <i>Heliconia caribaea</i>  | GQ248312 |
| Monocotyledons | Heliconiaceae | <i>Heliconia</i>  | <i>Heliconia caribaea</i>  | EF590701 |
| Monocotyledons | Arecaceae     | <i>Caryota</i>    | <i>Caryota maxima</i>      | HQ415573 |
| Monocotyledons | Arecaceae     | <i>Caryota</i>    | <i>Caryota maxima</i>      | JF345044 |
| Monocotyledons | Arecaceae     | <i>Caryota</i>    | <i>Caryota maxima</i>      | JF345045 |
| Monocotyledons | Arecaceae     | <i>Caryota</i>    | <i>Caryota maxima</i>      | JF345050 |
| Monocotyledons | Arecaceae     | <i>Caryota</i>    | <i>Caryota maxima</i>      | JF345051 |
| Monocotyledons | Arecaceae     | <i>Caryota</i>    | <i>Caryota maxima</i>      | JF345052 |
| Monocotyledons | Arecaceae     | <i>Caryota</i>    | <i>Caryota maxima</i>      | JF345053 |
| Monocotyledons | Arecaceae     | <i>Caryota</i>    | <i>Caryota maxima</i>      | JF345065 |
| Monocotyledons | Arecaceae     | <i>Caryota</i>    | <i>Caryota obtusa</i>      | JF345046 |
| Monocotyledons | Arecaceae     | <i>Caryota</i>    | <i>Caryota obtusa</i>      | JF345047 |
| Monocotyledons | Arecaceae     | <i>Caryota</i>    | <i>Caryota obtusa</i>      | JF345061 |
| Monocotyledons | Arecaceae     | <i>Caryota</i>    | <i>Caryota obtusa</i>      | JF345062 |
| Monocotyledons | Arecaceae     | <i>Caryota</i>    | <i>Caryota obtusa</i>      | JF345063 |
| Monocotyledons | Arecaceae     | <i>Caryota</i>    | <i>Caryota obtusa</i>      | JF345064 |
| Monocotyledons | Bromeliaceae  | <i>Pitcairnia</i> | <i>Pitcairnia flammea</i>  | JN204659 |
| Monocotyledons | Bromeliaceae  | <i>Pitcairnia</i> | <i>Pitcairnia flammea</i>  | JN204660 |
| Monocotyledons | Hypoxidaceae  | <i>Pauridia</i>   | <i>Pauridia longituba</i>  | FM206348 |
| Monocotyledons | Hypoxidaceae  | <i>Pauridia</i>   | <i>Pauridia longituba</i>  | FM206349 |
| Monocotyledons | Hypoxidaceae  | <i>Pauridia</i>   | <i>Pauridia longituba</i>  | FM206350 |
| Monocotyledons | Hypoxidaceae  | <i>Pauridia</i>   | <i>Pauridia longituba</i>  | FM206351 |
| Monocotyledons | Hypoxidaceae  | <i>Pauridia</i>   | <i>Pauridia longituba</i>  | FM206352 |
| Monocotyledons | Hypoxidaceae  | <i>Pauridia</i>   | <i>Pauridia longituba</i>  | FM206353 |
| Monocotyledons | Hypoxidaceae  | <i>Pauridia</i>   | <i>Pauridia longituba</i>  | FM206354 |
| Monocotyledons | Hypoxidaceae  | <i>Pauridia</i>   | <i>Pauridia longituba</i>  | FM206355 |
| Monocotyledons | Hypoxidaceae  | <i>Pauridia</i>   | <i>Pauridia longituba</i>  | FM206356 |
| Monocotyledons | Hypoxidaceae  | <i>Pauridia</i>   | <i>Pauridia longituba</i>  | FM206357 |
| Monocotyledons | Hypoxidaceae  | <i>Pauridia</i>   | <i>Pauridia longituba</i>  | FM206358 |
| Monocotyledons | Hypoxidaceae  | <i>Pauridia</i>   | <i>Pauridia longituba</i>  | FM206359 |
| Monocotyledons | Hypoxidaceae  | <i>Pauridia</i>   | <i>Pauridia longituba</i>  | FM206360 |
| Monocotyledons | Hypoxidaceae  | <i>Pauridia</i>   | <i>Pauridia longituba</i>  | FM206361 |
| Monocotyledons | Hypoxidaceae  | <i>Pauridia</i>   | <i>Pauridia longituba</i>  | FM206362 |
| Monocotyledons | Hypoxidaceae  | <i>Pauridia</i>   | <i>Pauridia longituba</i>  | FM206363 |
| Monocotyledons | Hypoxidaceae  | <i>Pauridia</i>   | <i>Pauridia longituba</i>  | FM206364 |



|        |                |                    |                                |          |
|--------|----------------|--------------------|--------------------------------|----------|
| Mosses | Polytrichaceae | <i>Polytrichum</i> | <i>Polytrichum juniperinum</i> | GQ248374 |
| Mosses | Polytrichaceae | <i>Polytrichum</i> | <i>Polytrichum juniperinum</i> | FJ572555 |
| Mosses | Polytrichaceae | <i>Polytrichum</i> | <i>Polytrichum juniperinum</i> | FJ572554 |
| Mosses | Polytrichaceae | <i>Polytrichum</i> | <i>Polytrichum juniperinum</i> | EU750675 |
| Mosses | Polytrichaceae | <i>Polytrichum</i> | <i>Polytrichum juniperinum</i> | EU750673 |
| Mosses | Polytrichaceae | <i>Polytrichum</i> | <i>Polytrichum juniperinum</i> | EU750674 |
| Mosses | Polytrichaceae | <i>Polytrichum</i> | <i>Polytrichum juniperinum</i> | EF590731 |
