# Supplementary material for: Utility of the trnH–psbA Intergenic Spacer Region and Its Combinations as Plant DNA Barcodes: A Meta-Analysis
Source: PubMed Central journal article supplement (PMC3498263; doi:10.1371/journal.pone.0048833), 2012-11-14
Supplement: pone.0048833.s003.pdf [file pone.0048833.s003.pdf]

**Table S3.** List of *trnH-psbA* samples used in this study. The names of the corresponding group, family, genus, and species, as well as the GenBank accession number for each sample are shown.

| <b>Taxonomy group</b> | <b>Family</b> | <b>Genus</b>         | <b>Species</b>                    | <b>GenBank accession no.</b> |
|-----------------------|---------------|----------------------|-----------------------------------|------------------------------|
| Eudicotyledons        | Betulaceae    | <i>Carpinus</i>      | <i>Carpinus betulus</i>           | FJ395523                     |
| Eudicotyledons        | Betulaceae    | <i>Carpinus</i>      | <i>Carpinus betulus</i>           | AY211429                     |
| Eudicotyledons        | Betulaceae    | <i>Carpinus</i>      | <i>Carpinus betulus</i>           | FJ011833                     |
| Eudicotyledons        | Betulaceae    | <i>Carpinus</i>      | <i>Carpinus caroliniana</i>       | AY211430                     |
| Eudicotyledons        | Betulaceae    | <i>Carpinus</i>      | <i>Carpinus caroliniana</i>       | DQ006158                     |
| Eudicotyledons        | Asteraceae    | <i>Achillea</i>      | <i>Achillea millefolium</i>       | FJ395492                     |
| Eudicotyledons        | Asteraceae    | <i>Achillea</i>      | <i>Achillea millefolium</i>       | HQ451003                     |
| Eudicotyledons        | Asteraceae    | <i>Achillea</i>      | <i>Achillea millefolium</i>       | HQ451004                     |
| Eudicotyledons        | Asteraceae    | <i>Achillea</i>      | <i>Achillea millefolium</i>       | HQ451005                     |
| Eudicotyledons        | Asteraceae    | <i>Achillea</i>      | <i>Achillea millefolium</i>       | HQ451006                     |
| Eudicotyledons        | Asteraceae    | <i>Achillea</i>      | <i>Achillea millefolium</i>       | HQ451007                     |
| Eudicotyledons        | Asteraceae    | <i>Achillea</i>      | <i>Achillea millefolium</i>       | HQ451053                     |
| Eudicotyledons        | Asteraceae    | <i>Achillea</i>      | <i>Achillea millefolium</i>       | HQ451054                     |
| Eudicotyledons        | Asteraceae    | <i>Achillea</i>      | <i>Achillea millefolium</i>       | HQ596580                     |
| Eudicotyledons        | Primulaceae   | <i>Ardisia</i>       | <i>Ardisia crenata</i>            | HQ427113                     |
| Eudicotyledons        | Primulaceae   | <i>Ardisia</i>       | <i>Ardisia crenata</i>            | GU135312                     |
| Eudicotyledons        | Primulaceae   | <i>Ardisia</i>       | <i>Ardisia crenata</i>            | GU135441                     |
| Eudicotyledons        | Betulaceae    | <i>Corylus</i>       | <i>Corylus avellana</i>           | FJ011848                     |
| Eudicotyledons        | Betulaceae    | <i>Corylus</i>       | <i>Corylus avellana</i>           | FR865092                     |
| Eudicotyledons        | Betulaceae    | <i>Corylus</i>       | <i>Corylus cornuta</i>            | HQ596654                     |
| Eudicotyledons        | Betulaceae    | <i>Corylus</i>       | <i>Corylus cornuta</i>            | AY211450                     |
| Eudicotyledons        | Betulaceae    | <i>Corylus</i>       | <i>Corylus cornuta</i>            | FJ011850                     |
| Eudicotyledons        | Oleaceae      | <i>Ligustrum</i>     | <i>Ligustrum vulgare</i>          | FJ395550                     |
| Eudicotyledons        | Oleaceae      | <i>Ligustrum</i>     | <i>Ligustrum vulgare</i>          | FJ493288                     |
| Eudicotyledons        | Oleaceae      | <i>Ligustrum</i>     | <i>Ligustrum vulgare</i>          | FN675794                     |
| Eudicotyledons        | Betulaceae    | <i>Ostrya</i>        | <i>Ostrya virginiana</i>          | HQ596777                     |
| Eudicotyledons        | Betulaceae    | <i>Ostrya</i>        | <i>Ostrya virginiana</i>          | HQ596778                     |
| Eudicotyledons        | Betulaceae    | <i>Ostrya</i>        | <i>Ostrya virginiana</i>          | AY211456                     |
| Eudicotyledons        | Betulaceae    | <i>Ostrya</i>        | <i>Ostrya virginiana</i>          | FJ011865                     |
| Eudicotyledons        | Asteraceae    | <i>Tragopogon</i>    | <i>Tragopogon porrifolius</i>     | GQ435123                     |
| Eudicotyledons        | Asteraceae    | <i>Tragopogon</i>    | <i>Tragopogon porrifolius</i>     | EF374277                     |
| Eudicotyledons        | Asteraceae    | <i>Tragopogon</i>    | <i>Tragopogon porrifolius</i>     | EF374278                     |
| Eudicotyledons        | Asteraceae    | <i>Tragopogon</i>    | <i>Tragopogon porrifolius</i>     | EF374279                     |
| Eudicotyledons        | Asteraceae    | <i>Tragopogon</i>    | <i>Tragopogon porrifolius</i>     | EF374280                     |
| Eudicotyledons        | Asteraceae    | <i>Tragopogon</i>    | <i>Tragopogon porrifolius</i>     | HQ162037                     |
| Eudicotyledons        | Juglandaceae  | <i>Juglans</i>       | <i>Juglans nigra</i>              | HQ596736                     |
| Eudicotyledons        | Juglandaceae  | <i>Juglans</i>       | <i>Juglans nigra</i>              | AY293339                     |
| Eudicotyledons        | Campanulaceae | <i>Cyananthus</i>    | <i>Cyananthus lobatus</i>         | JN044355                     |
| Eudicotyledons        | Campanulaceae | <i>Cyananthus</i>    | <i>Cyananthus lobatus</i>         | JN044356                     |
| Eudicotyledons        | Paeoniaceae   | <i>Paeonia</i>       | <i>Paeonia anomala</i>            | DQ313731                     |
| Eudicotyledons        | Paeoniaceae   | <i>Paeonia</i>       | <i>Paeonia anomala</i>            | DQ313732                     |
| Eudicotyledons        | Paeoniaceae   | <i>Paeonia</i>       | <i>Paeonia anomala</i>            | DQ313733                     |
| Eudicotyledons        | Paeoniaceae   | <i>Paeonia</i>       | <i>Paeonia anomala</i>            | DQ313734                     |
| Eudicotyledons        | Paeoniaceae   | <i>Paeonia</i>       | <i>Paeonia anomala</i>            | DQ313735                     |
| Eudicotyledons        | Paeoniaceae   | <i>Paeonia</i>       | <i>Paeonia anomala</i>            | GQ435203                     |
| Eudicotyledons        | Paeoniaceae   | <i>Paeonia</i>       | <i>Paeonia anomala</i>            | GQ435204                     |
| Eudicotyledons        | Paeoniaceae   | <i>Paeonia</i>       | <i>Paeonia delavayi</i>           | GU367368                     |
| Eudicotyledons        | Paeoniaceae   | <i>Paeonia</i>       | <i>Paeonia delavayi</i>           | JF496834                     |
| Eudicotyledons        | Asteraceae    | <i>Chrysanthemum</i> | <i>Chrysanthemum x morifolium</i> | EF091620                     |

|                |              |                      |                                   |          |
|----------------|--------------|----------------------|-----------------------------------|----------|
| Eudicotyledons | Asteraceae   | <i>Chrysanthemum</i> | <i>Chrysanthemum x morifolium</i> | EF091621 |
| Eudicotyledons | Asteraceae   | <i>Chrysanthemum</i> | <i>Chrysanthemum x morifolium</i> | EF091623 |
| Eudicotyledons | Asteraceae   | <i>Chrysanthemum</i> | <i>Chrysanthemum x morifolium</i> | EF091625 |
| Eudicotyledons | Asteraceae   | <i>Chrysanthemum</i> | <i>Chrysanthemum x morifolium</i> | GU575275 |
| Eudicotyledons | Asteraceae   | <i>Chrysanthemum</i> | <i>Chrysanthemum x morifolium</i> | GQ435094 |
| Eudicotyledons | Asteraceae   | <i>Tragopogon</i>    | <i>Tragopogon pratensis</i>       | FJ395553 |
| Eudicotyledons | Asteraceae   | <i>Tragopogon</i>    | <i>Tragopogon pratensis</i>       | EF374281 |
| Eudicotyledons | Asteraceae   | <i>Tragopogon</i>    | <i>Tragopogon dubius</i>          | HQ596868 |
| Eudicotyledons | Asteraceae   | <i>Tragopogon</i>    | <i>Tragopogon dubius</i>          | EF374262 |
| Eudicotyledons | Asteraceae   | <i>Tragopogon</i>    | <i>Tragopogon dubius</i>          | HQ162036 |
| Eudicotyledons | Oleaceae     | <i>Ligustrum</i>     | <i>Ligustrum japonicum</i>        | FN675796 |
| Eudicotyledons | Oleaceae     | <i>Ligustrum</i>     | <i>Ligustrum japonicum</i>        | JF830322 |
| Eudicotyledons | Oleaceae     | <i>Ligustrum</i>     | <i>Ligustrum japonicum</i>        | JF830323 |
| Eudicotyledons | Oleaceae     | <i>Ligustrum</i>     | <i>Ligustrum japonicum</i>        | JF830324 |
| Eudicotyledons | Oleaceae     | <i>Ligustrum</i>     | <i>Ligustrum japonicum</i>        | JF830325 |
| Eudicotyledons | Oleaceae     | <i>Ligustrum</i>     | <i>Ligustrum japonicum</i>        | JF830326 |
| Eudicotyledons | Juglandaceae | <i>Juglans</i>       | <i>Juglans regia</i>              | HE659564 |
| Eudicotyledons | Juglandaceae | <i>Juglans</i>       | <i>Juglans regia</i>              | GQ435024 |
| Eudicotyledons | Juglandaceae | <i>Juglans</i>       | <i>Juglans regia</i>              | AY293344 |
| Eudicotyledons | Styracaceae  | <i>Styrax</i>        | <i>Styrax japonicus</i>           | AB115400 |
| Eudicotyledons | Styracaceae  | <i>Styrax</i>        | <i>Styrax japonicus</i>           | AB237434 |
| Eudicotyledons | Styracaceae  | <i>Styrax</i>        | <i>Styrax japonicus</i>           | AB237435 |
| Eudicotyledons | Paeoniaceae  | <i>Paeonia</i>       | <i>Paeonia rockii</i>             | GU367372 |
| Eudicotyledons | Paeoniaceae  | <i>Paeonia</i>       | <i>Paeonia rockii</i>             | JF496836 |
| Eudicotyledons | Paeoniaceae  | <i>Paeonia</i>       | <i>Paeonia rockii</i>             | JF496837 |
| Eudicotyledons | Paeoniaceae  | <i>Paeonia</i>       | <i>Paeonia rockii</i>             | JF496838 |
| Eudicotyledons | Paeoniaceae  | <i>Paeonia</i>       | <i>Paeonia rockii</i>             | JF496839 |
| Eudicotyledons | Paeoniaceae  | <i>Paeonia</i>       | <i>Paeonia rockii</i>             | JF496840 |
| Eudicotyledons | Paeoniaceae  | <i>Paeonia</i>       | <i>Paeonia rockii</i>             | JF496841 |
| Eudicotyledons | Paeoniaceae  | <i>Paeonia</i>       | <i>Paeonia rockii</i>             | JF496842 |
| Eudicotyledons | Paeoniaceae  | <i>Paeonia</i>       | <i>Paeonia rockii</i>             | JF496843 |
| Eudicotyledons | Paeoniaceae  | <i>Paeonia</i>       | <i>Paeonia rockii</i>             | JF496844 |
| Eudicotyledons | Paeoniaceae  | <i>Paeonia</i>       | <i>Paeonia rockii</i>             | JF496845 |
| Eudicotyledons | Paeoniaceae  | <i>Paeonia</i>       | <i>Paeonia rockii</i>             | JF496846 |
| Eudicotyledons | Paeoniaceae  | <i>Paeonia</i>       | <i>Paeonia rockii</i>             | JF496847 |
| Eudicotyledons | Paeoniaceae  | <i>Paeonia</i>       | <i>Paeonia rockii</i>             | JF496848 |
| Eudicotyledons | Paeoniaceae  | <i>Paeonia</i>       | <i>Paeonia rockii</i>             | JF496849 |
| Eudicotyledons | Paeoniaceae  | <i>Paeonia</i>       | <i>Paeonia rockii</i>             | JF496850 |
| Eudicotyledons | Paeoniaceae  | <i>Paeonia</i>       | <i>Paeonia rockii</i>             | JF496851 |
| Eudicotyledons | Paeoniaceae  | <i>Paeonia</i>       | <i>Paeonia rockii</i>             | JF496852 |
| Eudicotyledons | Paeoniaceae  | <i>Paeonia</i>       | <i>Paeonia rockii</i>             | JF496853 |
| Eudicotyledons | Paeoniaceae  | <i>Paeonia</i>       | <i>Paeonia rockii</i>             | JF496854 |
| Eudicotyledons | Paeoniaceae  | <i>Paeonia</i>       | <i>Paeonia rockii</i>             | JF496855 |
| Eudicotyledons | Paeoniaceae  | <i>Paeonia</i>       | <i>Paeonia jishanensis</i>        | GU367369 |
| Eudicotyledons | Paeoniaceae  | <i>Paeonia</i>       | <i>Paeonia jishanensis</i>        | GU367370 |
| Eudicotyledons | Betulaceae   | <i>Carpinus</i>      | <i>Carpinus laxiflora</i>         | AY211434 |
| Eudicotyledons | Betulaceae   | <i>Carpinus</i>      | <i>Carpinus laxiflora</i>         | AY211435 |
| Eudicotyledons | Betulaceae   | <i>Carpinus</i>      | <i>Carpinus laxiflora</i>         | AB525361 |
| Eudicotyledons | Betulaceae   | <i>Carpinus</i>      | <i>Carpinus laxiflora</i>         | AB525362 |
| Eudicotyledons | Betulaceae   | <i>Carpinus</i>      | <i>Carpinus laxiflora</i>         | AB525363 |
| Eudicotyledons | Betulaceae   | <i>Carpinus</i>      | <i>Carpinus laxiflora</i>         | AB525364 |
| Eudicotyledons | Betulaceae   | <i>Carpinus</i>      | <i>Carpinus laxiflora</i>         | AB525365 |
| Eudicotyledons | Betulaceae   | <i>Carpinus</i>      | <i>Carpinus laxiflora</i>         | AB525366 |

|                |                 |                      |                                |          |
|----------------|-----------------|----------------------|--------------------------------|----------|
| Eudicotyledons | Betulaceae      | <i>Carpinus</i>      | <i>Carpinus laxiflora</i>      | AB525367 |
| Eudicotyledons | Betulaceae      | <i>Carpinus</i>      | <i>Carpinus laxiflora</i>      | AB525368 |
| Eudicotyledons | Betulaceae      | <i>Carpinus</i>      | <i>Carpinus laxiflora</i>      | FJ011840 |
| Eudicotyledons | Betulaceae      | <i>Corylus</i>       | <i>Corylus americana</i>       | AY211448 |
| Eudicotyledons | Betulaceae      | <i>Corylus</i>       | <i>Corylus americana</i>       | FJ011847 |
| Eudicotyledons | Betulaceae      | <i>Carpinus</i>      | <i>Carpinus turczaninovii</i>  | AY211446 |
| Eudicotyledons | Betulaceae      | <i>Carpinus</i>      | <i>Carpinus turczaninovii</i>  | FJ011846 |
| Eudicotyledons | Betulaceae      | <i>Corylus</i>       | <i>Corylus chinensis</i>       | AY211449 |
| Eudicotyledons | Betulaceae      | <i>Corylus</i>       | <i>Corylus chinensis</i>       | FJ011849 |
| Eudicotyledons | Betulaceae      | <i>Ostrya</i>        | <i>Ostrya rehderiana</i>       | AY211454 |
| Eudicotyledons | Betulaceae      | <i>Ostrya</i>        | <i>Ostrya rehderiana</i>       | AY211455 |
| Eudicotyledons | Betulaceae      | <i>Ostrya</i>        | <i>Ostrya rehderiana</i>       | FJ011863 |
| Eudicotyledons | Betulaceae      | <i>Ostrya</i>        | <i>Ostrya rehderiana</i>       | FJ011864 |
| Eudicotyledons | Betulaceae      | <i>Carpinus</i>      | <i>Carpinus cordata</i>        | AY211431 |
| Eudicotyledons | Betulaceae      | <i>Carpinus</i>      | <i>Carpinus cordata</i>        | AY211432 |
| Eudicotyledons | Betulaceae      | <i>Carpinus</i>      | <i>Carpinus cordata</i>        | FJ011834 |
| Eudicotyledons | Betulaceae      | <i>Carpinus</i>      | <i>Carpinus cordata</i>        | FJ011835 |
| Eudicotyledons | Juglandaceae    | <i>Juglans</i>       | <i>Juglans cathayensis</i>     | AY293334 |
| Eudicotyledons | Juglandaceae    | <i>Juglans</i>       | <i>Juglans cathayensis</i>     | JF708229 |
| Eudicotyledons | Juglandaceae    | <i>Juglans</i>       | <i>Juglans cinerea</i>         | HQ596735 |
| Eudicotyledons | Juglandaceae    | <i>Juglans</i>       | <i>Juglans cinerea</i>         | AY293347 |
| Eudicotyledons | Juglandaceae    | <i>Juglans</i>       | <i>Juglans olanchana</i>       | AY293333 |
| Eudicotyledons | Juglandaceae    | <i>Juglans</i>       | <i>Juglans olanchana</i>       | AY293345 |
| Eudicotyledons | Asteraceae      | <i>Eupatorium</i>    | <i>Eupatorium perfoliatum</i>  | GU014469 |
| Eudicotyledons | Asteraceae      | <i>Eupatorium</i>    | <i>Eupatorium perfoliatum</i>  | EU750465 |
| Eudicotyledons | Asteraceae      | <i>Eupatorium</i>    | <i>Eupatorium perfoliatum</i>  | EU750466 |
| Eudicotyledons | Asteraceae      | <i>Eupatorium</i>    | <i>Eupatorium serotinum</i>    | GU818373 |
| Eudicotyledons | Asteraceae      | <i>Eupatorium</i>    | <i>Eupatorium serotinum</i>    | GU014470 |
| Eudicotyledons | Primulaceae     | <i>Omphalogramma</i> | <i>Omphalogramma delavayi</i>  | JN045599 |
| Eudicotyledons | Primulaceae     | <i>Omphalogramma</i> | <i>Omphalogramma delavayi</i>  | JN045600 |
| Eudicotyledons | Primulaceae     | <i>Omphalogramma</i> | <i>Omphalogramma delavayi</i>  | JN045601 |
| Eudicotyledons | Primulaceae     | <i>Omphalogramma</i> | <i>Omphalogramma delavayi</i>  | JN045602 |
| Eudicotyledons | Primulaceae     | <i>Omphalogramma</i> | <i>Omphalogramma delavayi</i>  | JN045603 |
| Eudicotyledons | Salicaceae      | <i>Casearia</i>      | <i>Casearia sylvestris</i>     | GQ982170 |
| Eudicotyledons | Salicaceae      | <i>Casearia</i>      | <i>Casearia sylvestris</i>     | HM446898 |
| Eudicotyledons | Fabaceae        | <i>Anthyllis</i>     | <i>Anthyllis circinnata</i>    | HM468238 |
| Eudicotyledons | Fabaceae        | <i>Anthyllis</i>     | <i>Anthyllis circinnata</i>    | HQ646215 |
| Eudicotyledons | Melastomataceae | <i>Melastoma</i>     | <i>Melastoma candidum</i>      | GQ435425 |
| Eudicotyledons | Melastomataceae | <i>Melastoma</i>     | <i>Melastoma candidum</i>      | JN406998 |
| Eudicotyledons | Melastomataceae | <i>Melastoma</i>     | <i>Melastoma candidum</i>      | JN406999 |
| Eudicotyledons | Melastomataceae | <i>Melastoma</i>     | <i>Melastoma candidum</i>      | JN407000 |
| Eudicotyledons | Melastomataceae | <i>Melastoma</i>     | <i>Melastoma candidum</i>      | JN407001 |
| Eudicotyledons | Melastomataceae | <i>Melastoma</i>     | <i>Melastoma candidum</i>      | JF708230 |
| Eudicotyledons | Myrtaceae       | <i>Psidium</i>       | <i>Psidium guajava</i>         | GQ434986 |
| Eudicotyledons | Myrtaceae       | <i>Psidium</i>       | <i>Psidium guajava</i>         | GU135421 |
| Eudicotyledons | Asteraceae      | <i>Tolpis</i>        | <i>Tolpis coronopifolia</i>    | GU046621 |
| Eudicotyledons | Asteraceae      | <i>Tolpis</i>        | <i>Tolpis coronopifolia</i>    | GU046622 |
| Eudicotyledons | Vitaceae        | <i>Ampelopsis</i>    | <i>Ampelopsis megalophylla</i> | JQ182521 |
| Eudicotyledons | Vitaceae        | <i>Ampelopsis</i>    | <i>Ampelopsis megalophylla</i> | HQ656484 |
| Eudicotyledons | Oleaceae        | <i>Ligustrum</i>     | <i>Ligustrum ovalifolium</i>   | JF830304 |
| Eudicotyledons | Oleaceae        | <i>Ligustrum</i>     | <i>Ligustrum ovalifolium</i>   | JF830305 |
| Eudicotyledons | Oleaceae        | <i>Ligustrum</i>     | <i>Ligustrum ovalifolium</i>   | JF830306 |
| Eudicotyledons | Oleaceae        | <i>Ligustrum</i>     | <i>Ligustrum ovalifolium</i>   | JF830307 |

|                |                 |                      |                                      |          |
|----------------|-----------------|----------------------|--------------------------------------|----------|
| Eudicotyledons | Oleaceae        | <i>Ligustrum</i>     | <i>Ligustrum ovalifolium</i>         | JF830308 |
| Eudicotyledons | Oleaceae        | <i>Ligustrum</i>     | <i>Ligustrum ovalifolium</i>         | JF830309 |
| Eudicotyledons | Oleaceae        | <i>Ligustrum</i>     | <i>Ligustrum ovalifolium</i>         | JF830310 |
| Eudicotyledons | Oleaceae        | <i>Ligustrum</i>     | <i>Ligustrum ovalifolium</i>         | JF830311 |
| Eudicotyledons | Oleaceae        | <i>Ligustrum</i>     | <i>Ligustrum ovalifolium</i>         | JF830312 |
| Eudicotyledons | Oleaceae        | <i>Ligustrum</i>     | <i>Ligustrum sempervirens</i>        | JF830258 |
| Eudicotyledons | Oleaceae        | <i>Ligustrum</i>     | <i>Ligustrum sempervirens</i>        | JF830259 |
| Eudicotyledons | Oleaceae        | <i>Ligustrum</i>     | <i>Ligustrum sempervirens</i>        | JF830260 |
| Eudicotyledons | Oleaceae        | <i>Picconia</i>      | <i>Picconia excelsa</i>              | EU854417 |
| Eudicotyledons | Oleaceae        | <i>Picconia</i>      | <i>Picconia excelsa</i>              | EU854418 |
| Eudicotyledons | Melastomataceae | <i>Melastoma</i>     | <i>Melastoma dodecandrum</i>         | GQ435424 |
| Eudicotyledons | Melastomataceae | <i>Melastoma</i>     | <i>Melastoma dodecandrum</i>         | JN040997 |
| Eudicotyledons | Polygonaceae    | <i>Oxyria</i>        | <i>Oxyria sinensis</i>               | JN045696 |
| Eudicotyledons | Polygonaceae    | <i>Oxyria</i>        | <i>Oxyria sinensis</i>               | JN045697 |
| Eudicotyledons | Polygonaceae    | <i>Oxyria</i>        | <i>Oxyria sinensis</i>               | JN045698 |
| Eudicotyledons | Betulaceae      | <i>Carpinus</i>      | <i>Carpinus londoniana</i>           | AY211436 |
| Eudicotyledons | Betulaceae      | <i>Carpinus</i>      | <i>Carpinus londoniana</i>           | AY211437 |
| Eudicotyledons | Apocynaceae     | <i>Caralluma</i>     | <i>Caralluma indica</i>              | HM475430 |
| Eudicotyledons | Apocynaceae     | <i>Caralluma</i>     | <i>Caralluma indica</i>              | HM475461 |
| Eudicotyledons | Rosaceae        | <i>Pyracantha</i>    | <i>Pyracantha fortuneana</i>         | JQ390761 |
| Eudicotyledons | Rosaceae        | <i>Pyracantha</i>    | <i>Pyracantha fortuneana</i>         | JN046710 |
| Eudicotyledons | Rosaceae        | <i>Pyracantha</i>    | <i>Pyracantha fortuneana</i>         | JN046711 |
| Eudicotyledons | Rosaceae        | <i>Pyracantha</i>    | <i>Pyracantha fortuneana</i>         | JN046712 |
| Eudicotyledons | Rosaceae        | <i>Pyracantha</i>    | <i>Pyracantha fortuneana</i>         | JN046713 |
| Eudicotyledons | Rosaceae        | <i>Pyracantha</i>    | <i>Pyracantha fortuneana</i>         | JN046714 |
| Eudicotyledons | Rosaceae        | <i>Pyracantha</i>    | <i>Pyracantha fortuneana</i>         | JN046715 |
| Eudicotyledons | Rosaceae        | <i>Pyracantha</i>    | <i>Pyracantha fortuneana</i>         | JN046716 |
| Eudicotyledons | Rosaceae        | <i>Pyracantha</i>    | <i>Pyracantha fortuneana</i>         | JN046717 |
| Eudicotyledons | Rosaceae        | <i>Pyracantha</i>    | <i>Pyracantha fortuneana</i>         | JN046718 |
| Eudicotyledons | Malvaceae       | <i>Althaea</i>       | <i>Althaea officinalis</i>           | EF679752 |
| Eudicotyledons | Malvaceae       | <i>Althaea</i>       | <i>Althaea officinalis</i>           | EF419652 |
| Eudicotyledons | Malvaceae       | <i>Althaea</i>       | <i>Althaea officinalis</i>           | EF419653 |
| Eudicotyledons | Malvaceae       | <i>Althaea</i>       | <i>Althaea officinalis</i>           | EF419654 |
| Eudicotyledons | Malvaceae       | <i>Althaea</i>       | <i>Althaea officinalis</i>           | EF419655 |
| Eudicotyledons | Malvaceae       | <i>Althaea</i>       | <i>Althaea officinalis</i>           | EF419656 |
| Eudicotyledons | Asteraceae      | <i>Chrysanthemum</i> | <i>Chrysanthemum indicum</i>         | EF091608 |
| Eudicotyledons | Asteraceae      | <i>Chrysanthemum</i> | <i>Chrysanthemum indicum</i>         | GQ435133 |
| Eudicotyledons | Asteraceae      | <i>Chrysanthemum</i> | <i>Chrysanthemum indicum</i>         | AB234760 |
| Eudicotyledons | Asteraceae      | <i>Chrysanthemum</i> | <i>Chrysanthemum indicum</i>         | AB234761 |
| Eudicotyledons | Asteraceae      | <i>Chrysanthemum</i> | <i>Chrysanthemum indicum</i>         | AB234762 |
| Eudicotyledons | Asteraceae      | <i>Chrysanthemum</i> | <i>Chrysanthemum indicum</i>         | AB234763 |
| Eudicotyledons | Asteraceae      | <i>Chrysanthemum</i> | <i>Chrysanthemum indicum</i>         | AB234764 |
| Eudicotyledons | Asteraceae      | <i>Chrysanthemum</i> | <i>Chrysanthemum indicum</i>         | AB234765 |
| Eudicotyledons | Asteraceae      | <i>Chrysanthemum</i> | <i>Chrysanthemum indicum</i>         | AB234770 |
| Eudicotyledons | Asteraceae      | <i>Chrysanthemum</i> | <i>Chrysanthemum indicum</i>         | AB234776 |
| Eudicotyledons | Asteraceae      | <i>Chrysanthemum</i> | <i>Chrysanthemum indicum</i>         | AB234777 |
| Eudicotyledons | Asteraceae      | <i>Chrysanthemum</i> | <i>Chrysanthemum indicum</i>         | AB234779 |
| Eudicotyledons | Asteraceae      | <i>Chrysanthemum</i> | <i>Chrysanthemum lavandulifolium</i> | EF091614 |
| Eudicotyledons | Asteraceae      | <i>Chrysanthemum</i> | <i>Chrysanthemum lavandulifolium</i> | GQ435132 |
| Eudicotyledons | Asteraceae      | <i>Chrysanthemum</i> | <i>Chrysanthemum zawadskii</i>       | EF091627 |
| Eudicotyledons | Asteraceae      | <i>Chrysanthemum</i> | <i>Chrysanthemum zawadskii</i>       | AB234743 |
| Eudicotyledons | Asteraceae      | <i>Chrysanthemum</i> | <i>Chrysanthemum zawadskii</i>       | AB234744 |
| Eudicotyledons | Asteraceae      | <i>Chrysanthemum</i> | <i>Chrysanthemum zawadskii</i>       | AB234746 |

|                |             |                      |                                  |          |
|----------------|-------------|----------------------|----------------------------------|----------|
| Eudicotyledons | Asteraceae  | <i>Chrysanthemum</i> | <i>Chrysanthemum zawadskii</i>   | AB234747 |
| Eudicotyledons | Asteraceae  | <i>Chrysanthemum</i> | <i>Chrysanthemum zawadskii</i>   | AB234766 |
| Eudicotyledons | Asteraceae  | <i>Chrysanthemum</i> | <i>Chrysanthemum zawadskii</i>   | AB234767 |
| Eudicotyledons | Asteraceae  | <i>Chrysanthemum</i> | <i>Chrysanthemum zawadskii</i>   | AB234768 |
| Eudicotyledons | Vitaceae    | <i>Cayratia</i>      | <i>Cayratia japonica</i>         | JQ182535 |
| Eudicotyledons | Vitaceae    | <i>Cayratia</i>      | <i>Cayratia japonica</i>         | HM585664 |
| Eudicotyledons | Vitaceae    | <i>Cayratia</i>      | <i>Cayratia japonica</i>         | JF437078 |
| Eudicotyledons | Vitaceae    | <i>Cayratia</i>      | <i>Cayratia japonica</i>         | JF437082 |
| Eudicotyledons | Vitaceae    | <i>Cayratia</i>      | <i>Cayratia japonica</i>         | JF437083 |
| Eudicotyledons | Vitaceae    | <i>Cayratia</i>      | <i>Cayratia japonica</i>         | JF437084 |
| Eudicotyledons | Vitaceae    | <i>Cayratia</i>      | <i>Cayratia trifolia</i>         | JQ182533 |
| Eudicotyledons | Vitaceae    | <i>Cayratia</i>      | <i>Cayratia trifolia</i>         | HM585666 |
| Eudicotyledons | Vitaceae    | <i>Cayratia</i>      | <i>Cayratia trifolia</i>         | JF437080 |
| Eudicotyledons | Vitaceae    | <i>Cayratia</i>      | <i>Cayratia trifolia</i>         | JF437081 |
| Eudicotyledons | Vitaceae    | <i>Cissus</i>        | <i>Cissus repens</i>             | GU372818 |
| Eudicotyledons | Vitaceae    | <i>Cissus</i>        | <i>Cissus repens</i>             | GU372819 |
| Eudicotyledons | Vitaceae    | <i>Cissus</i>        | <i>Cissus repens</i>             | HM585672 |
| Eudicotyledons | Vitaceae    | <i>Cissus</i>        | <i>Cissus repens</i>             | HQ656490 |
| Eudicotyledons | Styracaceae | <i>Styrax</i>        | <i>Styrax suberifolius</i>       | HQ415402 |
| Eudicotyledons | Styracaceae | <i>Styrax</i>        | <i>Styrax suberifolius</i>       | HQ426971 |
| Eudicotyledons | Cactaceae   | <i>Pfeiffera</i>     | <i>Pfeiffera ianthothele</i>     | FR716785 |
| Eudicotyledons | Cactaceae   | <i>Pfeiffera</i>     | <i>Pfeiffera ianthothele</i>     | FR716786 |
| Eudicotyledons | Cactaceae   | <i>Pfeiffera</i>     | <i>Pfeiffera miyagawae</i>       | FN995429 |
| Eudicotyledons | Cactaceae   | <i>Pfeiffera</i>     | <i>Pfeiffera miyagawae</i>       | FN995432 |
| Eudicotyledons | Cactaceae   | <i>Pfeiffera</i>     | <i>Pfeiffera monacantha</i>      | FN995430 |
| Eudicotyledons | Cactaceae   | <i>Pfeiffera</i>     | <i>Pfeiffera monacantha</i>      | FN995431 |
| Eudicotyledons | Cactaceae   | <i>Lepismium</i>     | <i>Lepismium cruciforme</i>      | FN669012 |
| Eudicotyledons | Cactaceae   | <i>Lepismium</i>     | <i>Lepismium cruciforme</i>      | FN669013 |
| Eudicotyledons | Cactaceae   | <i>Lepismium</i>     | <i>Lepismium cruciforme</i>      | FN669014 |
| Eudicotyledons | Ericaceae   | <i>Gaultheria</i>    | <i>Gaultheria borneensis</i>     | JN044550 |
| Eudicotyledons | Ericaceae   | <i>Gaultheria</i>    | <i>Gaultheria borneensis</i>     | JN044551 |
| Eudicotyledons | Ericaceae   | <i>Gaultheria</i>    | <i>Gaultheria leucocarpa</i>     | JN044630 |
| Eudicotyledons | Ericaceae   | <i>Gaultheria</i>    | <i>Gaultheria leucocarpa</i>     | JN044631 |
| Eudicotyledons | Ericaceae   | <i>Gaultheria</i>    | <i>Gaultheria leucocarpa</i>     | JN044632 |
| Eudicotyledons | Ericaceae   | <i>Gaultheria</i>    | <i>Gaultheria leucocarpa</i>     | JN044633 |
| Eudicotyledons | Ericaceae   | <i>Gaultheria</i>    | <i>Gaultheria leucocarpa</i>     | JN044634 |
| Eudicotyledons | Ericaceae   | <i>Gaultheria</i>    | <i>Gaultheria leucocarpa</i>     | JN044635 |
| Eudicotyledons | Ericaceae   | <i>Gaultheria</i>    | <i>Gaultheria leucocarpa</i>     | JN044636 |
| Eudicotyledons | Ericaceae   | <i>Gaultheria</i>    | <i>Gaultheria leucocarpa</i>     | JN044637 |
| Eudicotyledons | Ericaceae   | <i>Gaultheria</i>    | <i>Gaultheria leucocarpa</i>     | JN044638 |
| Eudicotyledons | Ericaceae   | <i>Gaultheria</i>    | <i>Gaultheria leucocarpa</i>     | JN044639 |
| Eudicotyledons | Ericaceae   | <i>Gaultheria</i>    | <i>Gaultheria leucocarpa</i>     | JN044640 |
| Eudicotyledons | Ericaceae   | <i>Gaultheria</i>    | <i>Gaultheria leucocarpa</i>     | JN044641 |
| Eudicotyledons | Ericaceae   | <i>Gaultheria</i>    | <i>Gaultheria leucocarpa</i>     | JN044642 |
| Eudicotyledons | Ericaceae   | <i>Gaultheria</i>    | <i>Gaultheria leucocarpa</i>     | JN044643 |
| Eudicotyledons | Ericaceae   | <i>Gaultheria</i>    | <i>Gaultheria leucocarpa</i>     | JN044644 |
| Eudicotyledons | Ericaceae   | <i>Gaultheria</i>    | <i>Gaultheria leucocarpa</i>     | JN044645 |
| Eudicotyledons | Ericaceae   | <i>Gaultheria</i>    | <i>Gaultheria leucocarpa</i>     | JN044646 |
| Eudicotyledons | Ericaceae   | <i>Gaultheria</i>    | <i>Gaultheria leucocarpa</i>     | JN044647 |
| Eudicotyledons | Ericaceae   | <i>Gaultheria</i>    | <i>Gaultheria leucocarpa</i>     | JN044648 |
| Eudicotyledons | Ericaceae   | <i>Gaultheria</i>    | <i>Gaultheria leucocarpa</i>     | JN044649 |
| Eudicotyledons | Ericaceae   | <i>Gaultheria</i>    | <i>Gaultheria nummularioides</i> | JN044657 |
| Eudicotyledons | Ericaceae   | <i>Gaultheria</i>    | <i>Gaultheria nummularioides</i> | JN044658 |

|                |            |                    |                                  |          |
|----------------|------------|--------------------|----------------------------------|----------|
| Eudicotyledons | Ericaceae  | <i>Gaultheria</i>  | <i>Gaultheria nummularioides</i> | JN044659 |
| Eudicotyledons | Ericaceae  | <i>Gaultheria</i>  | <i>Gaultheria nummularioides</i> | JN044660 |
| Eudicotyledons | Ericaceae  | <i>Gaultheria</i>  | <i>Gaultheria nummularioides</i> | JN044661 |
| Eudicotyledons | Ericaceae  | <i>Gaultheria</i>  | <i>Gaultheria nummularioides</i> | JN044662 |
| Eudicotyledons | Ericaceae  | <i>Gaultheria</i>  | <i>Gaultheria nummularioides</i> | JN044663 |
| Eudicotyledons | Ericaceae  | <i>Gaultheria</i>  | <i>Gaultheria nummularioides</i> | JN044664 |
| Eudicotyledons | Ericaceae  | <i>Gaultheria</i>  | <i>Gaultheria nummularioides</i> | JN044665 |
| Eudicotyledons | Fabaceae   | <i>Eperua</i>      | <i>Eperua falcata</i>            | GQ428689 |
| Eudicotyledons | Fabaceae   | <i>Eperua</i>      | <i>Eperua falcata</i>            | JN661742 |
| Eudicotyledons | Fabaceae   | <i>Eperua</i>      | <i>Eperua falcata</i>            | JN661752 |
| Eudicotyledons | Fabaceae   | <i>Eperua</i>      | <i>Eperua falcata</i>            | FJ038923 |
| Eudicotyledons | Fabaceae   | <i>Eperua</i>      | <i>Eperua falcata</i>            | FJ038924 |
| Eudicotyledons | Fabaceae   | <i>Eperua</i>      | <i>Eperua grandiflora</i>        | GQ428690 |
| Eudicotyledons | Fabaceae   | <i>Eperua</i>      | <i>Eperua grandiflora</i>        | FJ038925 |
| Eudicotyledons | Fabaceae   | <i>Eperua</i>      | <i>Eperua grandiflora</i>        | FJ038926 |
| Eudicotyledons | Fagaceae   | <i>Castanopsis</i> | <i>Castanopsis argyrophylla</i>  | JN044187 |
| Eudicotyledons | Fagaceae   | <i>Castanopsis</i> | <i>Castanopsis argyrophylla</i>  | JN044188 |
| Eudicotyledons | Fagaceae   | <i>Castanopsis</i> | <i>Castanopsis carlesii</i>      | HQ427016 |
| Eudicotyledons | Fagaceae   | <i>Castanopsis</i> | <i>Castanopsis carlesii</i>      | JN044189 |
| Eudicotyledons | Fagaceae   | <i>Castanopsis</i> | <i>Castanopsis carlesii</i>      | JN044190 |
| Eudicotyledons | Fagaceae   | <i>Castanopsis</i> | <i>Castanopsis carlesii</i>      | JN044191 |
| Eudicotyledons | Fagaceae   | <i>Castanopsis</i> | <i>Castanopsis carlesii</i>      | JN044192 |
| Eudicotyledons | Fagaceae   | <i>Castanopsis</i> | <i>Castanopsis carlesii</i>      | JN044193 |
| Eudicotyledons | Fagaceae   | <i>Castanopsis</i> | <i>Castanopsis ceratacantha</i>  | JN044194 |
| Eudicotyledons | Fagaceae   | <i>Castanopsis</i> | <i>Castanopsis ceratacantha</i>  | JN044195 |
| Eudicotyledons | Fagaceae   | <i>Castanopsis</i> | <i>Castanopsis ceratacantha</i>  | JN044196 |
| Eudicotyledons | Fagaceae   | <i>Castanopsis</i> | <i>Castanopsis ceratacantha</i>  | JN044197 |
| Eudicotyledons | Fagaceae   | <i>Castanopsis</i> | <i>Castanopsis fargesii</i>      | HQ427014 |
| Eudicotyledons | Fagaceae   | <i>Castanopsis</i> | <i>Castanopsis fargesii</i>      | JN044208 |
| Eudicotyledons | Fagaceae   | <i>Castanopsis</i> | <i>Castanopsis fargesii</i>      | JN044209 |
| Eudicotyledons | Fagaceae   | <i>Castanopsis</i> | <i>Castanopsis fargesii</i>      | JN044210 |
| Eudicotyledons | Fagaceae   | <i>Castanopsis</i> | <i>Castanopsis fissa</i>         | HQ415580 |
| Eudicotyledons | Fagaceae   | <i>Castanopsis</i> | <i>Castanopsis fissa</i>         | JN044211 |
| Eudicotyledons | Fagaceae   | <i>Castanopsis</i> | <i>Castanopsis fissa</i>         | JN044212 |
| Eudicotyledons | Fagaceae   | <i>Castanopsis</i> | <i>Castanopsis fissa</i>         | JN044213 |
| Eudicotyledons | Fagaceae   | <i>Castanopsis</i> | <i>Castanopsis rockii</i>        | JN044231 |
| Eudicotyledons | Fagaceae   | <i>Castanopsis</i> | <i>Castanopsis rockii</i>        | JN044232 |
| Eudicotyledons | Fagaceae   | <i>Castanopsis</i> | <i>Castanopsis rockii</i>        | JN044233 |
| Eudicotyledons | Fabaceae   | <i>Anthyllis</i>   | <i>Anthyllis montana</i>         | HM468248 |
| Eudicotyledons | Fabaceae   | <i>Anthyllis</i>   | <i>Anthyllis montana</i>         | HQ646221 |
| Eudicotyledons | Fabaceae   | <i>Anthyllis</i>   | <i>Anthyllis aurea</i>           | HM468236 |
| Eudicotyledons | Fabaceae   | <i>Anthyllis</i>   | <i>Anthyllis aurea</i>           | HQ646211 |
| Eudicotyledons | Fabaceae   | <i>Anthyllis</i>   | <i>Anthyllis barba-jovis</i>     | HM468237 |
| Eudicotyledons | Fabaceae   | <i>Anthyllis</i>   | <i>Anthyllis barba-jovis</i>     | HQ646212 |
| Eudicotyledons | Fabaceae   | <i>Anthyllis</i>   | <i>Anthyllis barba-jovis</i>     | HQ646213 |
| Eudicotyledons | Fabaceae   | <i>Anthyllis</i>   | <i>Anthyllis barba-jovis</i>     | HQ646214 |
| Eudicotyledons | Cactaceae  | <i>Rhipsalis</i>   | <i>Rhipsalis teres</i>           | FN669077 |
| Eudicotyledons | Cactaceae  | <i>Rhipsalis</i>   | <i>Rhipsalis teres</i>           | FN669078 |
| Eudicotyledons | Cactaceae  | <i>Rhipsalis</i>   | <i>Rhipsalis teres</i>           | FN669080 |
| Eudicotyledons | Cactaceae  | <i>Rhipsalis</i>   | <i>Rhipsalis teres</i>           | FN669159 |
| Eudicotyledons | Ericaceae  | <i>Enkianthus</i>  | <i>Enkianthus chinensis</i>      | JN044451 |
| Eudicotyledons | Ericaceae  | <i>Enkianthus</i>  | <i>Enkianthus chinensis</i>      | JN044452 |
| Eudicotyledons | Asteraceae | <i>Galinsoga</i>   | <i>Galinsoga parviflora</i>      | GQ435097 |

|                |             |                      |                                  |          |
|----------------|-------------|----------------------|----------------------------------|----------|
| Eudicotyledons | Asteraceae  | <i>Galinsoga</i>     | <i>Galinsoga parviflora</i>      | DQ006151 |
| Eudicotyledons | Betulaceae  | <i>Carpinus</i>      | <i>Carpinus japonica</i>         | FJ011836 |
| Eudicotyledons | Betulaceae  | <i>Carpinus</i>      | <i>Carpinus japonica</i>         | FJ011837 |
| Eudicotyledons | Betulaceae  | <i>Carpinus</i>      | <i>Carpinus japonica</i>         | FJ011838 |
| Eudicotyledons | Betulaceae  | <i>Carpinus</i>      | <i>Carpinus monbeigiana</i>      | AY211438 |
| Eudicotyledons | Betulaceae  | <i>Carpinus</i>      | <i>Carpinus monbeigiana</i>      | AY211439 |
| Eudicotyledons | Betulaceae  | <i>Carpinus</i>      | <i>Carpinus monbeigiana</i>      | AY211440 |
| Eudicotyledons | Betulaceae  | <i>Carpinus</i>      | <i>Carpinus monbeigiana</i>      | AY211441 |
| Eudicotyledons | Betulaceae  | <i>Ostrya</i>        | <i>Ostrya carpinifolia</i>       | AY211451 |
| Eudicotyledons | Betulaceae  | <i>Ostrya</i>        | <i>Ostrya carpinifolia</i>       | FJ011860 |
| Eudicotyledons | Betulaceae  | <i>Ostrya</i>        | <i>Ostrya japonica</i>           | AY211452 |
| Eudicotyledons | Betulaceae  | <i>Ostrya</i>        | <i>Ostrya japonica</i>           | FJ011861 |
| Eudicotyledons | Betulaceae  | <i>Ostrya</i>        | <i>Ostrya knowltonii</i>         | AY211453 |
| Eudicotyledons | Betulaceae  | <i>Ostrya</i>        | <i>Ostrya knowltonii</i>         | FJ011862 |
| Eudicotyledons | Vitaceae    | <i>Tetrastigma</i>   | <i>Tetrastigma trifoliolatum</i> | HM585780 |
| Eudicotyledons | Vitaceae    | <i>Tetrastigma</i>   | <i>Tetrastigma trifoliolatum</i> | HM585781 |
| Eudicotyledons | Vitaceae    | <i>Tetrastigma</i>   | <i>Tetrastigma obovatum</i>      | HM585746 |
| Eudicotyledons | Vitaceae    | <i>Tetrastigma</i>   | <i>Tetrastigma obovatum</i>      | HM585747 |
| Eudicotyledons | Vitaceae    | <i>Tetrastigma</i>   | <i>Tetrastigma obovatum</i>      | HM585748 |
| Eudicotyledons | Fabaceae    | <i>Anthyllis</i>     | <i>Anthyllis cornicina</i>       | HM468239 |
| Eudicotyledons | Fabaceae    | <i>Anthyllis</i>     | <i>Anthyllis cornicina</i>       | HQ646223 |
| Eudicotyledons | Fabaceae    | <i>Anthyllis</i>     | <i>Anthyllis hermanniae</i>      | HM468243 |
| Eudicotyledons | Fabaceae    | <i>Anthyllis</i>     | <i>Anthyllis hermanniae</i>      | HQ646217 |
| Eudicotyledons | Fabaceae    | <i>Anthyllis</i>     | <i>Anthyllis hermanniae</i>      | HQ646218 |
| Eudicotyledons | Fabaceae    | <i>Anthyllis</i>     | <i>Anthyllis lotoides</i>        | HM468247 |
| Eudicotyledons | Fabaceae    | <i>Anthyllis</i>     | <i>Anthyllis lotoides</i>        | HQ646220 |
| Eudicotyledons | Asteraceae  | <i>Galinsoga</i>     | <i>Galinsoga quadriradiata</i>   | GU818377 |
| Eudicotyledons | Asteraceae  | <i>Galinsoga</i>     | <i>Galinsoga quadriradiata</i>   | HQ596705 |
| Eudicotyledons | Asteraceae  | <i>Galinsoga</i>     | <i>Galinsoga quadriradiata</i>   | AY215550 |
| Eudicotyledons | Ericaceae   | <i>Cassiope</i>      | <i>Cassiope fastigiata</i>       | JN044175 |
| Eudicotyledons | Ericaceae   | <i>Cassiope</i>      | <i>Cassiope fastigiata</i>       | JN044176 |
| Eudicotyledons | Ericaceae   | <i>Cassiope</i>      | <i>Cassiope fastigiata</i>       | JN044177 |
| Eudicotyledons | Ericaceae   | <i>Cassiope</i>      | <i>Cassiope fastigiata</i>       | JN044178 |
| Eudicotyledons | Rosaceae    | <i>Pyracantha</i>    | <i>Pyracantha coccinea</i>       | JQ390762 |
| Eudicotyledons | Rosaceae    | <i>Pyracantha</i>    | <i>Pyracantha coccinea</i>       | GQ305327 |
| Eudicotyledons | Apocynaceae | <i>Caralluma</i>     | <i>Caralluma arabica</i>         | HM475411 |
| Eudicotyledons | Apocynaceae | <i>Caralluma</i>     | <i>Caralluma arabica</i>         | HM475412 |
| Eudicotyledons | Apocynaceae | <i>Caralluma</i>     | <i>Caralluma flava</i>           | HM475425 |
| Eudicotyledons | Apocynaceae | <i>Caralluma</i>     | <i>Caralluma flava</i>           | HM475426 |
| Eudicotyledons | Apocynaceae | <i>Caralluma</i>     | <i>Caralluma penicillata</i>     | HM475436 |
| Eudicotyledons | Apocynaceae | <i>Caralluma</i>     | <i>Caralluma penicillata</i>     | HM475437 |
| Eudicotyledons | Fabaceae    | <i>Calliandra</i>    | <i>Calliandra juzepczukii</i>    | AF524959 |
| Eudicotyledons | Fabaceae    | <i>Calliandra</i>    | <i>Calliandra juzepczukii</i>    | EU811999 |
| Eudicotyledons | Fabaceae    | <i>Inga</i>          | <i>Inga edulis</i>               | GQ118870 |
| Eudicotyledons | Fabaceae    | <i>Inga</i>          | <i>Inga edulis</i>               | AF524976 |
| Eudicotyledons | Fabaceae    | <i>Inga</i>          | <i>Inga edulis</i>               | AM922019 |
| Eudicotyledons | Fabaceae    | <i>Inga</i>          | <i>Inga edulis</i>               | AM922020 |
| Eudicotyledons | Fabaceae    | <i>Inga</i>          | <i>Inga edulis</i>               | AM922021 |
| Eudicotyledons | Primulaceae | <i>Omphalogramma</i> | <i>Omphalogramma vinciflorum</i> | JN045628 |
| Eudicotyledons | Primulaceae | <i>Omphalogramma</i> | <i>Omphalogramma vinciflorum</i> | JN045629 |
| Eudicotyledons | Primulaceae | <i>Omphalogramma</i> | <i>Omphalogramma vinciflorum</i> | JN045630 |
| Eudicotyledons | Primulaceae | <i>Omphalogramma</i> | <i>Omphalogramma vinciflorum</i> | JN045631 |
| Eudicotyledons | Primulaceae | <i>Omphalogramma</i> | <i>Omphalogramma vinciflorum</i> | JN045632 |

|                |                |                      |                                  |          |
|----------------|----------------|----------------------|----------------------------------|----------|
| Eudicotyledons | Primulaceae    | <i>Omphalogramma</i> | <i>Omphalogramma vinciflorum</i> | JN045633 |
| Eudicotyledons | Primulaceae    | <i>Omphalogramma</i> | <i>Omphalogramma vinciflorum</i> | JN045634 |
| Eudicotyledons | Primulaceae    | <i>Omphalogramma</i> | <i>Omphalogramma vinciflorum</i> | JN045635 |
| Eudicotyledons | Primulaceae    | <i>Omphalogramma</i> | <i>Omphalogramma vinciflorum</i> | JN045636 |
| Eudicotyledons | Primulaceae    | <i>Omphalogramma</i> | <i>Omphalogramma vinciflorum</i> | JN045637 |
| Eudicotyledons | Fabaceae       | <i>Anthyllis</i>     | <i>Anthyllis hamosa</i>          | HM468241 |
| Eudicotyledons | Fabaceae       | <i>Anthyllis</i>     | <i>Anthyllis hamosa</i>          | HQ646216 |
| Eudicotyledons | Sapotaceae     | <i>Chrysophyllum</i> | <i>Chrysophyllum cainito</i>     | DQ344096 |
| Eudicotyledons | Sapotaceae     | <i>Chrysophyllum</i> | <i>Chrysophyllum cainito</i>     | GQ982186 |
| Eudicotyledons | Sapotaceae     | <i>Chrysophyllum</i> | <i>Chrysophyllum argenteum</i>   | FJ039052 |
| Eudicotyledons | Sapotaceae     | <i>Chrysophyllum</i> | <i>Chrysophyllum argenteum</i>   | FJ039053 |
| Eudicotyledons | Sapotaceae     | <i>Chrysophyllum</i> | <i>Chrysophyllum argenteum</i>   | GQ982185 |
| Eudicotyledons | Burseraceae    | <i>Protium</i>       | <i>Protium decandrum</i>         | GQ428774 |
| Eudicotyledons | Burseraceae    | <i>Protium</i>       | <i>Protium decandrum</i>         | FJ038870 |
| Eudicotyledons | Burseraceae    | <i>Protium</i>       | <i>Protium opacum</i>            | GQ428755 |
| Eudicotyledons | Burseraceae    | <i>Protium</i>       | <i>Protium opacum</i>            | GQ428756 |
| Eudicotyledons | Burseraceae    | <i>Protium</i>       | <i>Protium opacum</i>            | FJ038879 |
| Eudicotyledons | Burseraceae    | <i>Protium</i>       | <i>Protium sagotianum</i>        | GQ428757 |
| Eudicotyledons | Burseraceae    | <i>Protium</i>       | <i>Protium sagotianum</i>        | GQ428758 |
| Eudicotyledons | Burseraceae    | <i>Protium</i>       | <i>Protium sagotianum</i>        | FJ038876 |
| Eudicotyledons | Burseraceae    | <i>Protium</i>       | <i>Protium sagotianum</i>        | FJ038877 |
| Eudicotyledons | Burseraceae    | <i>Protium</i>       | <i>Protium trifoliolatum</i>     | GQ428761 |
| Eudicotyledons | Burseraceae    | <i>Protium</i>       | <i>Protium trifoliolatum</i>     | FJ038875 |
| Eudicotyledons | Burseraceae    | <i>Protium</i>       | <i>Protium trifoliolatum</i>     | FJ038878 |
| Eudicotyledons | Fabaceae       | <i>Inga</i>          | <i>Inga punctata</i>             | GQ118882 |
| Eudicotyledons | Fabaceae       | <i>Inga</i>          | <i>Inga punctata</i>             | GQ982259 |
| Eudicotyledons | Fabaceae       | <i>Inga</i>          | <i>Inga punctata</i>             | AM922040 |
| Eudicotyledons | Fabaceae       | <i>Inga</i>          | <i>Inga punctata</i>             | AM922041 |
| Eudicotyledons | Fabaceae       | <i>Inga</i>          | <i>Inga punctata</i>             | AM922042 |
| Eudicotyledons | Fabaceae       | <i>Inga</i>          | <i>Inga punctata</i>             | AM922043 |
| Eudicotyledons | Fabaceae       | <i>Inga</i>          | <i>Inga punctata</i>             | AM922054 |
| Eudicotyledons | Asteraceae     | <i>Gazania</i>       | <i>Gazania tenuifolia</i>        | EF556405 |
| Eudicotyledons | Asteraceae     | <i>Gazania</i>       | <i>Gazania tenuifolia</i>        | EF556406 |
| Eudicotyledons | Plantaginaceae | <i>Synthyris</i>     | <i>Synthyris alpina</i>          | EU242526 |
| Eudicotyledons | Plantaginaceae | <i>Synthyris</i>     | <i>Synthyris alpina</i>          | EU242527 |
| Eudicotyledons | Plantaginaceae | <i>Synthyris</i>     | <i>Synthyris alpina</i>          | EU242528 |
| Eudicotyledons | Plantaginaceae | <i>Synthyris</i>     | <i>Synthyris alpina</i>          | EU242529 |
| Eudicotyledons | Plantaginaceae | <i>Synthyris</i>     | <i>Synthyris alpina</i>          | EU242530 |
| Eudicotyledons | Plantaginaceae | <i>Synthyris</i>     | <i>Synthyris alpina</i>          | EU242531 |
| Eudicotyledons | Plantaginaceae | <i>Synthyris</i>     | <i>Synthyris alpina</i>          | EU242532 |
| Eudicotyledons | Plantaginaceae | <i>Synthyris</i>     | <i>Synthyris alpina</i>          | EU242533 |
| Eudicotyledons | Plantaginaceae | <i>Synthyris</i>     | <i>Synthyris alpina</i>          | EU242534 |
| Eudicotyledons | Plantaginaceae | <i>Synthyris</i>     | <i>Synthyris alpina</i>          | EU242535 |
| Eudicotyledons | Plantaginaceae | <i>Synthyris</i>     | <i>Synthyris alpina</i>          | EU242536 |
| Eudicotyledons | Plantaginaceae | <i>Synthyris</i>     | <i>Synthyris alpina</i>          | EU242537 |
| Eudicotyledons | Plantaginaceae | <i>Synthyris</i>     | <i>Synthyris alpina</i>          | EU242538 |
| Eudicotyledons | Plantaginaceae | <i>Synthyris</i>     | <i>Synthyris alpina</i>          | EU242539 |
| Eudicotyledons | Plantaginaceae | <i>Synthyris</i>     | <i>Synthyris alpina</i>          | EU242540 |
| Eudicotyledons | Plantaginaceae | <i>Synthyris</i>     | <i>Synthyris alpina</i>          | EU242541 |
| Eudicotyledons | Plantaginaceae | <i>Synthyris</i>     | <i>Synthyris alpina</i>          | EU242542 |
| Eudicotyledons | Plantaginaceae | <i>Synthyris</i>     | <i>Synthyris alpina</i>          | EU242543 |
| Eudicotyledons | Plantaginaceae | <i>Synthyris</i>     | <i>Synthyris alpina</i>          | EU242544 |
| Eudicotyledons | Plantaginaceae | <i>Synthyris</i>     | <i>Synthyris alpina</i>          | EU242545 |

































|                |             |                      |                               |          |
|----------------|-------------|----------------------|-------------------------------|----------|
| Eudicotyledons | Rosaceae    | <i>Cliffortia</i>    | <i>Cliffortia odorata</i>     | EU937596 |
| Eudicotyledons | Rosaceae    | <i>Cliffortia</i>    | <i>Cliffortia odorata</i>     | EU937597 |
| Eudicotyledons | Asteraceae  | <i>Achillea</i>      | <i>Achillea asiatica</i>      | HQ451008 |
| Eudicotyledons | Asteraceae  | <i>Achillea</i>      | <i>Achillea asiatica</i>      | HQ451009 |
| Eudicotyledons | Asteraceae  | <i>Achillea</i>      | <i>Achillea asiatica</i>      | HQ451010 |
| Eudicotyledons | Asteraceae  | <i>Achillea</i>      | <i>Achillea asiatica</i>      | HQ451011 |
| Eudicotyledons | Asteraceae  | <i>Achillea</i>      | <i>Achillea asiatica</i>      | HQ451012 |
| Eudicotyledons | Asteraceae  | <i>Achillea</i>      | <i>Achillea asiatica</i>      | HQ451013 |
| Eudicotyledons | Asteraceae  | <i>Achillea</i>      | <i>Achillea asiatica</i>      | HQ451014 |
| Eudicotyledons | Asteraceae  | <i>Achillea</i>      | <i>Achillea asiatica</i>      | HQ451015 |
| Eudicotyledons | Asteraceae  | <i>Achillea</i>      | <i>Achillea asiatica</i>      | HQ451016 |
| Eudicotyledons | Asteraceae  | <i>Achillea</i>      | <i>Achillea asiatica</i>      | HQ451017 |
| Eudicotyledons | Asteraceae  | <i>Achillea</i>      | <i>Achillea asiatica</i>      | HQ451018 |
| Eudicotyledons | Asteraceae  | <i>Achillea</i>      | <i>Achillea asiatica</i>      | HQ451019 |
| Eudicotyledons | Asteraceae  | <i>Achillea</i>      | <i>Achillea asiatica</i>      | HQ451020 |
| Eudicotyledons | Asteraceae  | <i>Achillea</i>      | <i>Achillea asiatica</i>      | HQ451021 |
| Eudicotyledons | Asteraceae  | <i>Achillea</i>      | <i>Achillea asiatica</i>      | HQ451022 |
| Eudicotyledons | Asteraceae  | <i>Achillea</i>      | <i>Achillea asiatica</i>      | HQ451023 |
| Eudicotyledons | Asteraceae  | <i>Achillea</i>      | <i>Achillea asiatica</i>      | HQ451024 |
| Eudicotyledons | Asteraceae  | <i>Achillea</i>      | <i>Achillea asiatica</i>      | HQ451025 |
| Eudicotyledons | Asteraceae  | <i>Achillea</i>      | <i>Achillea asiatica</i>      | HQ451026 |
| Eudicotyledons | Asteraceae  | <i>Achillea</i>      | <i>Achillea asiatica</i>      | HQ451027 |
| Eudicotyledons | Asteraceae  | <i>Achillea</i>      | <i>Achillea aspleniifolia</i> | HQ451028 |
| Eudicotyledons | Asteraceae  | <i>Achillea</i>      | <i>Achillea aspleniifolia</i> | HQ451029 |
| Eudicotyledons | Asteraceae  | <i>Achillea</i>      | <i>Achillea aspleniifolia</i> | HQ451030 |
| Eudicotyledons | Asteraceae  | <i>Achillea</i>      | <i>Achillea aspleniifolia</i> | HQ451031 |
| Eudicotyledons | Asteraceae  | <i>Achillea</i>      | <i>Achillea aspleniifolia</i> | HQ451032 |
| Eudicotyledons | Asteraceae  | <i>Achillea</i>      | <i>Achillea aspleniifolia</i> | HQ451033 |
| Eudicotyledons | Asteraceae  | <i>Achillea</i>      | <i>Achillea aspleniifolia</i> | HQ451034 |
| Eudicotyledons | Asteraceae  | <i>Achillea</i>      | <i>Achillea distans</i>       | HQ451040 |
| Eudicotyledons | Asteraceae  | <i>Achillea</i>      | <i>Achillea distans</i>       | HQ451041 |
| Eudicotyledons | Asteraceae  | <i>Achillea</i>      | <i>Achillea rosealba</i>      | HQ451055 |
| Eudicotyledons | Asteraceae  | <i>Achillea</i>      | <i>Achillea rosealba</i>      | HQ451056 |
| Eudicotyledons | Asteraceae  | <i>Achillea</i>      | <i>Achillea rosealba</i>      | HQ451057 |
| Eudicotyledons | Asteraceae  | <i>Achillea</i>      | <i>Achillea rosealba</i>      | HQ451058 |
| Eudicotyledons | Asteraceae  | <i>Achillea</i>      | <i>Achillea rosealba</i>      | HQ451059 |
| Eudicotyledons | Asteraceae  | <i>Achillea</i>      | <i>Achillea rosealba</i>      | HQ451060 |
| Eudicotyledons | Asteraceae  | <i>Achillea</i>      | <i>Achillea rosealba</i>      | HQ451061 |
| Eudicotyledons | Asteraceae  | <i>Achillea</i>      | <i>Achillea schmakovii</i>    | HQ451062 |
| Eudicotyledons | Asteraceae  | <i>Achillea</i>      | <i>Achillea schmakovii</i>    | HQ451063 |
| Eudicotyledons | Asteraceae  | <i>Achillea</i>      | <i>Achillea setacea</i>       | HQ451064 |
| Eudicotyledons | Asteraceae  | <i>Achillea</i>      | <i>Achillea setacea</i>       | HQ451065 |
| Eudicotyledons | Asteraceae  | <i>Achillea</i>      | <i>Achillea setacea</i>       | HQ451066 |
| Eudicotyledons | Asteraceae  | <i>Achillea</i>      | <i>Achillea setacea</i>       | HQ451067 |
| Eudicotyledons | Asteraceae  | <i>Achillea</i>      | <i>Achillea setacea</i>       | HQ451068 |
| Eudicotyledons | Asteraceae  | <i>Achillea</i>      | <i>Achillea setacea</i>       | HQ451069 |
| Eudicotyledons | Asteraceae  | <i>Achillea</i>      | <i>Achillea setacea</i>       | HQ451070 |
| Eudicotyledons | Asteraceae  | <i>Achillea</i>      | <i>Achillea wilsoniana</i>    | GU724266 |
| Eudicotyledons | Asteraceae  | <i>Achillea</i>      | <i>Achillea wilsoniana</i>    | GQ435138 |
| Eudicotyledons | Asteraceae  | <i>Achillea</i>      | <i>Achillea wilsoniana</i>    | GQ435139 |
| Eudicotyledons | Primulaceae | <i>Omphalogramma</i> | <i>Omphalogramma souliei</i>  | JN045619 |
| Eudicotyledons | Primulaceae | <i>Omphalogramma</i> | <i>Omphalogramma souliei</i>  | JN045620 |
| Eudicotyledons | Primulaceae | <i>Omphalogramma</i> | <i>Omphalogramma souliei</i>  | JN045621 |





|                |               |                      |                                 |          |
|----------------|---------------|----------------------|---------------------------------|----------|
| Eudicotyledons | Polygonaceae  | <i>Oxyria</i>        | <i>Oxyria digyna</i>            | JN045694 |
| Eudicotyledons | Polygonaceae  | <i>Oxyria</i>        | <i>Oxyria digyna</i>            | JN045695 |
| Eudicotyledons | Asteraceae    | <i>Tragopogon</i>    | <i>Tragopogon coloratus</i>     | EU391970 |
| Eudicotyledons | Asteraceae    | <i>Tragopogon</i>    | <i>Tragopogon coloratus</i>     | EF374257 |
| Eudicotyledons | Asteraceae    | <i>Tragopogon</i>    | <i>Tragopogon coloratus</i>     | EF374258 |
| Eudicotyledons | Asteraceae    | <i>Tragopogon</i>    | <i>Tragopogon dasyrhynchus</i>  | EF374260 |
| Eudicotyledons | Asteraceae    | <i>Tragopogon</i>    | <i>Tragopogon dasyrhynchus</i>  | EF374261 |
| Eudicotyledons | Asteraceae    | <i>Tragopogon</i>    | <i>Tragopogon latifolius</i>    | EU391972 |
| Eudicotyledons | Asteraceae    | <i>Tragopogon</i>    | <i>Tragopogon latifolius</i>    | EF374269 |
| Eudicotyledons | Vitaceae      | <i>Cissus</i>        | <i>Cissus verticillata</i>      | JQ182495 |
| Eudicotyledons | Vitaceae      | <i>Cissus</i>        | <i>Cissus verticillata</i>      | HM585674 |
| Eudicotyledons | Vitaceae      | <i>Cissus</i>        | <i>Cissus verticillata</i>      | JF437101 |
| Eudicotyledons | Violaceae     | <i>Viola</i>         | <i>Viola hondoensis</i>         | GQ262596 |
| Eudicotyledons | Violaceae     | <i>Viola</i>         | <i>Viola hondoensis</i>         | GQ262633 |
| Eudicotyledons | Violaceae     | <i>Viola</i>         | <i>Viola grypoceras</i>         | GQ262603 |
| Eudicotyledons | Violaceae     | <i>Viola</i>         | <i>Viola grypoceras</i>         | HM483582 |
| Eudicotyledons | Violaceae     | <i>Viola</i>         | <i>Viola verecunda</i>          | GQ262606 |
| Eudicotyledons | Violaceae     | <i>Viola</i>         | <i>Viola verecunda</i>          | GQ262607 |
| Eudicotyledons | Violaceae     | <i>Viola</i>         | <i>Viola rossii</i>             | GQ262609 |
| Eudicotyledons | Violaceae     | <i>Viola</i>         | <i>Viola rossii</i>             | GQ262610 |
| Eudicotyledons | Violaceae     | <i>Viola</i>         | <i>Viola philippica</i>         | GQ262625 |
| Eudicotyledons | Violaceae     | <i>Viola</i>         | <i>Viola philippica</i>         | GQ435054 |
| Eudicotyledons | Violaceae     | <i>Viola</i>         | <i>Viola violacea</i>           | GQ262631 |
| Eudicotyledons | Violaceae     | <i>Viola</i>         | <i>Viola violacea</i>           | HM483596 |
| Eudicotyledons | Euphorbiaceae | <i>Croton</i>        | <i>Croton gratissimus</i>       | EU213803 |
| Eudicotyledons | Euphorbiaceae | <i>Croton</i>        | <i>Croton gratissimus</i>       | EU213804 |
| Eudicotyledons | Euphorbiaceae | <i>Croton</i>        | <i>Croton gratissimus</i>       | EU213805 |
| Eudicotyledons | Asteraceae    | <i>Eupatorium</i>    | <i>Eupatorium fortunei</i>      | GU724260 |
| Eudicotyledons | Asteraceae    | <i>Eupatorium</i>    | <i>Eupatorium fortunei</i>      | GQ435109 |
| Eudicotyledons | Asteraceae    | <i>Eupatorium</i>    | <i>Eupatorium fortunei</i>      | GQ435110 |
| Eudicotyledons | Asteraceae    | <i>Eupatorium</i>    | <i>Eupatorium fortunei</i>      | GQ435111 |
| Eudicotyledons | Asteraceae    | <i>Chrysanthemum</i> | <i>Chrysanthemum boreale</i>    | AB234748 |
| Eudicotyledons | Asteraceae    | <i>Chrysanthemum</i> | <i>Chrysanthemum boreale</i>    | AB234749 |
| Eudicotyledons | Asteraceae    | <i>Chrysanthemum</i> | <i>Chrysanthemum boreale</i>    | AB234750 |
| Eudicotyledons | Asteraceae    | <i>Chrysanthemum</i> | <i>Chrysanthemum boreale</i>    | AB234751 |
| Eudicotyledons | Asteraceae    | <i>Chrysanthemum</i> | <i>Chrysanthemum boreale</i>    | AB234752 |
| Eudicotyledons | Asteraceae    | <i>Chrysanthemum</i> | <i>Chrysanthemum boreale</i>    | AB234753 |
| Eudicotyledons | Asteraceae    | <i>Chrysanthemum</i> | <i>Chrysanthemum boreale</i>    | AB234754 |
| Eudicotyledons | Asteraceae    | <i>Chrysanthemum</i> | <i>Chrysanthemum boreale</i>    | AB234755 |
| Eudicotyledons | Asteraceae    | <i>Chrysanthemum</i> | <i>Chrysanthemum boreale</i>    | AB234756 |
| Eudicotyledons | Asteraceae    | <i>Chrysanthemum</i> | <i>Chrysanthemum boreale</i>    | AB234757 |
| Eudicotyledons | Asteraceae    | <i>Chrysanthemum</i> | <i>Chrysanthemum boreale</i>    | AB234758 |
| Eudicotyledons | Asteraceae    | <i>Chrysanthemum</i> | <i>Chrysanthemum boreale</i>    | AB234759 |
| Eudicotyledons | Asteraceae    | <i>Chrysanthemum</i> | <i>Chrysanthemum boreale</i>    | AB234769 |
| Eudicotyledons | Asteraceae    | <i>Chrysanthemum</i> | <i>Chrysanthemum boreale</i>    | AB234778 |
| Eudicotyledons | Asteraceae    | <i>Chrysanthemum</i> | <i>Chrysanthemum japonense</i>  | AB234771 |
| Eudicotyledons | Asteraceae    | <i>Chrysanthemum</i> | <i>Chrysanthemum japonense</i>  | AB234772 |
| Eudicotyledons | Asteraceae    | <i>Chrysanthemum</i> | <i>Chrysanthemum arisanense</i> | AB234780 |
| Eudicotyledons | Asteraceae    | <i>Chrysanthemum</i> | <i>Chrysanthemum arisanense</i> | AB234781 |
| Eudicotyledons | Vitaceae      | <i>Ampelopsis</i>    | <i>Ampelopsis bodinieri</i>     | JQ182519 |
| Eudicotyledons | Vitaceae      | <i>Ampelopsis</i>    | <i>Ampelopsis bodinieri</i>     | JF437060 |
| Eudicotyledons | Vitaceae      | <i>Ampelopsis</i>    | <i>Ampelopsis bodinieri</i>     | JF437061 |
| Eudicotyledons | Vitaceae      | <i>Ampelopsis</i>    | <i>Ampelopsis cantoniensis</i>  | JQ182498 |

|                |                |                     |                                  |          |
|----------------|----------------|---------------------|----------------------------------|----------|
| Eudicotyledons | Vitaceae       | <i>Ampelopsis</i>   | <i>Ampelopsis cantoniensis</i>   | JN043979 |
| Eudicotyledons | Vitaceae       | <i>Ampelopsis</i>   | <i>Ampelopsis cantoniensis</i>   | JN043980 |
| Eudicotyledons | Vitaceae       | <i>Ampelopsis</i>   | <i>Ampelopsis cantoniensis</i>   | JN043981 |
| Eudicotyledons | Vitaceae       | <i>Ampelopsis</i>   | <i>Ampelopsis cantoniensis</i>   | JN043982 |
| Eudicotyledons | Vitaceae       | <i>Ampelopsis</i>   | <i>Ampelopsis cantoniensis</i>   | HM585660 |
| Eudicotyledons | Vitaceae       | <i>Ampelopsis</i>   | <i>Ampelopsis cantoniensis</i>   | JF437062 |
| Eudicotyledons | Vitaceae       | <i>Ampelopsis</i>   | <i>Ampelopsis chaffanjonii</i>   | JQ182528 |
| Eudicotyledons | Vitaceae       | <i>Ampelopsis</i>   | <i>Ampelopsis chaffanjonii</i>   | JN043983 |
| Eudicotyledons | Vitaceae       | <i>Ampelopsis</i>   | <i>Ampelopsis chaffanjonii</i>   | JN043984 |
| Eudicotyledons | Vitaceae       | <i>Ampelopsis</i>   | <i>Ampelopsis chaffanjonii</i>   | JN043985 |
| Eudicotyledons | Vitaceae       | <i>Ampelopsis</i>   | <i>Ampelopsis chaffanjonii</i>   | JN043986 |
| Eudicotyledons | Vitaceae       | <i>Ampelopsis</i>   | <i>Ampelopsis chaffanjonii</i>   | JF437063 |
| Eudicotyledons | Vitaceae       | <i>Ampelopsis</i>   | <i>Ampelopsis cordata</i>        | JQ182513 |
| Eudicotyledons | Vitaceae       | <i>Ampelopsis</i>   | <i>Ampelopsis cordata</i>        | JF437064 |
| Eudicotyledons | Vitaceae       | <i>Ampelopsis</i>   | <i>Ampelopsis delavayana</i>     | JN043987 |
| Eudicotyledons | Vitaceae       | <i>Ampelopsis</i>   | <i>Ampelopsis delavayana</i>     | JN043988 |
| Eudicotyledons | Vitaceae       | <i>Ampelopsis</i>   | <i>Ampelopsis delavayana</i>     | JF437065 |
| Eudicotyledons | Vitaceae       | <i>Ampelopsis</i>   | <i>Ampelopsis glandulosa</i>     | JQ182530 |
| Eudicotyledons | Vitaceae       | <i>Ampelopsis</i>   | <i>Ampelopsis glandulosa</i>     | JF437067 |
| Eudicotyledons | Vitaceae       | <i>Ampelopsis</i>   | <i>Ampelopsis glandulosa</i>     | JF437068 |
| Eudicotyledons | Vitaceae       | <i>Ampelopsis</i>   | <i>Ampelopsis glandulosa</i>     | JF437069 |
| Eudicotyledons | Vitaceae       | <i>Cissus</i>       | <i>Cissus incisa</i>             | HM585670 |
| Eudicotyledons | Vitaceae       | <i>Cissus</i>       | <i>Cissus incisa</i>             | JF437094 |
| Eudicotyledons | Vitaceae       | <i>Tetrastigma</i>  | <i>Tetrastigma laoticum</i>      | HM585732 |
| Eudicotyledons | Vitaceae       | <i>Tetrastigma</i>  | <i>Tetrastigma laoticum</i>      | HM585733 |
| Eudicotyledons | Vitaceae       | <i>Tetrastigma</i>  | <i>Tetrastigma laoticum</i>      | HM585734 |
| Eudicotyledons | Vitaceae       | <i>Tetrastigma</i>  | <i>Tetrastigma laoticum</i>      | HM585735 |
| Eudicotyledons | Vitaceae       | <i>Tetrastigma</i>  | <i>Tetrastigma obtectum</i>      | HM585749 |
| Eudicotyledons | Vitaceae       | <i>Tetrastigma</i>  | <i>Tetrastigma obtectum</i>      | HM585750 |
| Eudicotyledons | Vitaceae       | <i>Tetrastigma</i>  | <i>Tetrastigma obtectum</i>      | HM585751 |
| Eudicotyledons | Vitaceae       | <i>Tetrastigma</i>  | <i>Tetrastigma obtectum</i>      | JF437146 |
| Eudicotyledons | Vitaceae       | <i>Tetrastigma</i>  | <i>Tetrastigma obtectum</i>      | JF437154 |
| Eudicotyledons | Vitaceae       | <i>Tetrastigma</i>  | <i>Tetrastigma serrulatum</i>    | HM585764 |
| Eudicotyledons | Vitaceae       | <i>Tetrastigma</i>  | <i>Tetrastigma serrulatum</i>    | HM585765 |
| Eudicotyledons | Vitaceae       | <i>Tetrastigma</i>  | <i>Tetrastigma serrulatum</i>    | HM585766 |
| Eudicotyledons | Vitaceae       | <i>Tetrastigma</i>  | <i>Tetrastigma serrulatum</i>    | JF437149 |
| Eudicotyledons | Vitaceae       | <i>Tetrastigma</i>  | <i>Tetrastigma siamense</i>      | HM585767 |
| Eudicotyledons | Vitaceae       | <i>Tetrastigma</i>  | <i>Tetrastigma siamense</i>      | JF437150 |
| Eudicotyledons | Vitaceae       | <i>Tetrastigma</i>  | <i>Tetrastigma triphyllum</i>    | HM585782 |
| Eudicotyledons | Vitaceae       | <i>Tetrastigma</i>  | <i>Tetrastigma triphyllum</i>    | HM585783 |
| Eudicotyledons | Vitaceae       | <i>Tetrastigma</i>  | <i>Tetrastigma triphyllum</i>    | JF437151 |
| Eudicotyledons | Vitaceae       | <i>Tetrastigma</i>  | <i>Tetrastigma triphyllum</i>    | JF437152 |
| Eudicotyledons | Convolvulaceae | <i>Jacquemontia</i> | <i>Jacquemontia havanensis</i>   | DQ994737 |
| Eudicotyledons | Convolvulaceae | <i>Jacquemontia</i> | <i>Jacquemontia havanensis</i>   | DQ994738 |
| Eudicotyledons | Convolvulaceae | <i>Jacquemontia</i> | <i>Jacquemontia havanensis</i>   | DQ994741 |
| Eudicotyledons | Convolvulaceae | <i>Jacquemontia</i> | <i>Jacquemontia havanensis</i>   | DQ994742 |
| Eudicotyledons | Convolvulaceae | <i>Jacquemontia</i> | <i>Jacquemontia verticillata</i> | DQ994732 |
| Eudicotyledons | Convolvulaceae | <i>Jacquemontia</i> | <i>Jacquemontia verticillata</i> | DQ994733 |
| Eudicotyledons | Asteraceae     | <i>Achillea</i>     | <i>Achillea latiloba</i>         | HQ451049 |
| Eudicotyledons | Asteraceae     | <i>Achillea</i>     | <i>Achillea latiloba</i>         | HQ451050 |
| Eudicotyledons | Asteraceae     | <i>Achillea</i>     | <i>Achillea latiloba</i>         | HQ451051 |
| Eudicotyledons | Paeoniaceae    | <i>Paeonia</i>      | <i>Paeonia intermedia</i>        | DQ313729 |
| Eudicotyledons | Paeoniaceae    | <i>Paeonia</i>      | <i>Paeonia intermedia</i>        | DQ313730 |

|                |                |                     |                                  |          |
|----------------|----------------|---------------------|----------------------------------|----------|
| Eudicotyledons | Polygonaceae   | <i>Bistorta</i>     | <i>Bistorta vivipara</i>         | JN046447 |
| Eudicotyledons | Polygonaceae   | <i>Bistorta</i>     | <i>Bistorta vivipara</i>         | JN046448 |
| Eudicotyledons | Polygonaceae   | <i>Bistorta</i>     | <i>Bistorta vivipara</i>         | JN046449 |
| Eudicotyledons | Polygonaceae   | <i>Bistorta</i>     | <i>Bistorta vivipara</i>         | JN046450 |
| Eudicotyledons | Cactaceae      | <i>Opuntia</i>      | <i>Opuntia ficus-indica</i>      | FJ026612 |
| Eudicotyledons | Cactaceae      | <i>Opuntia</i>      | <i>Opuntia ficus-indica</i>      | FJ026613 |
| Eudicotyledons | Cactaceae      | <i>Opuntia</i>      | <i>Opuntia ficus-indica</i>      | EU930405 |
| Eudicotyledons | Cactaceae      | <i>Opuntia</i>      | <i>Opuntia ficus-indica</i>      | EU930414 |
| Eudicotyledons | Cactaceae      | <i>Opuntia</i>      | <i>Opuntia ficus-indica</i>      | EU930418 |
| Eudicotyledons | Cactaceae      | <i>Opuntia</i>      | <i>Opuntia ficus-indica</i>      | EU930420 |
| Eudicotyledons | Convolvulaceae | <i>Jacquemontia</i> | <i>Jacquemontia ovalifolia</i>   | DQ994743 |
| Eudicotyledons | Convolvulaceae | <i>Jacquemontia</i> | <i>Jacquemontia ovalifolia</i>   | FJ792543 |
| Eudicotyledons | Myrtaceae      | <i>Psidium</i>      | <i>Psidium cattleyanum</i>       | AM489878 |
| Eudicotyledons | Myrtaceae      | <i>Psidium</i>      | <i>Psidium cattleyanum</i>       | GU135360 |
| Eudicotyledons | Cactaceae      | <i>Opuntia</i>      | <i>Opuntia albicarpa</i>         | EU930410 |
| Eudicotyledons | Cactaceae      | <i>Opuntia</i>      | <i>Opuntia albicarpa</i>         | EU930411 |
| Eudicotyledons | Cactaceae      | <i>Opuntia</i>      | <i>Opuntia albicarpa</i>         | EU930412 |
| Eudicotyledons | Cactaceae      | <i>Opuntia</i>      | <i>Opuntia albicarpa</i>         | EU930419 |
| Eudicotyledons | Vitaceae       | <i>Ampelopsis</i>   | <i>Ampelopsis grossedentata</i>  | JQ182531 |
| Eudicotyledons | Vitaceae       | <i>Ampelopsis</i>   | <i>Ampelopsis grossedentata</i>  | JN043989 |
| Eudicotyledons | Vitaceae       | <i>Ampelopsis</i>   | <i>Ampelopsis grossedentata</i>  | JN043990 |
| Eudicotyledons | Vitaceae       | <i>Ampelopsis</i>   | <i>Ampelopsis grossedentata</i>  | JN043991 |
| Eudicotyledons | Vitaceae       | <i>Ampelopsis</i>   | <i>Ampelopsis grossedentata</i>  | JF437070 |
| Eudicotyledons | Vitaceae       | <i>Cissus</i>       | <i>Cissus aralioides</i>         | JQ182508 |
| Eudicotyledons | Vitaceae       | <i>Cissus</i>       | <i>Cissus aralioides</i>         | JF437088 |
| Eudicotyledons | Vitaceae       | <i>Cissus</i>       | <i>Cissus erosa</i>              | HM585668 |
| Eudicotyledons | Vitaceae       | <i>Cissus</i>       | <i>Cissus erosa</i>              | JF437093 |
| Eudicotyledons | Vitaceae       | <i>Cissus</i>       | <i>Cissus rotundifolia</i>       | JF437098 |
| Eudicotyledons | Vitaceae       | <i>Cissus</i>       | <i>Cissus rotundifolia</i>       | JF437099 |
| Eudicotyledons | Fagaceae       | <i>Castanopsis</i>  | <i>Castanopsis eyrei</i>         | HQ427008 |
| Eudicotyledons | Fagaceae       | <i>Castanopsis</i>  | <i>Castanopsis eyrei</i>         | JN044201 |
| Eudicotyledons | Fagaceae       | <i>Castanopsis</i>  | <i>Castanopsis eyrei</i>         | JN044202 |
| Eudicotyledons | Fagaceae       | <i>Castanopsis</i>  | <i>Castanopsis eyrei</i>         | JN044203 |
| Eudicotyledons | Fagaceae       | <i>Castanopsis</i>  | <i>Castanopsis fabri</i>         | JN044204 |
| Eudicotyledons | Fagaceae       | <i>Castanopsis</i>  | <i>Castanopsis fabri</i>         | JN044205 |
| Eudicotyledons | Fagaceae       | <i>Castanopsis</i>  | <i>Castanopsis fabri</i>         | JN044206 |
| Eudicotyledons | Fagaceae       | <i>Castanopsis</i>  | <i>Castanopsis fabri</i>         | JN044207 |
| Eudicotyledons | Fagaceae       | <i>Castanopsis</i>  | <i>Castanopsis sclerophylla</i>  | JN044234 |
| Eudicotyledons | Fagaceae       | <i>Castanopsis</i>  | <i>Castanopsis sclerophylla</i>  | JN044235 |
| Eudicotyledons | Fagaceae       | <i>Castanopsis</i>  | <i>Castanopsis sclerophylla</i>  | JN044236 |
| Eudicotyledons | Euphorbiaceae  | <i>Croton</i>       | <i>Croton billbergianus</i>      | HM044813 |
| Eudicotyledons | Euphorbiaceae  | <i>Croton</i>       | <i>Croton billbergianus</i>      | GQ982201 |
| Eudicotyledons | Vitaceae       | <i>Tetrastigma</i>  | <i>Tetrastigma rumicispermum</i> | HM585763 |
| Eudicotyledons | Vitaceae       | <i>Tetrastigma</i>  | <i>Tetrastigma rumicispermum</i> | HQ656488 |
| Eudicotyledons | Acanthaceae    | <i>Ruellia</i>      | <i>Ruellia bourgaei</i>          | GQ995636 |
| Eudicotyledons | Acanthaceae    | <i>Ruellia</i>      | <i>Ruellia bourgaei</i>          | GQ995637 |
| Eudicotyledons | Acanthaceae    | <i>Ruellia</i>      | <i>Ruellia bourgaei</i>          | GQ995638 |
| Eudicotyledons | Acanthaceae    | <i>Ruellia</i>      | <i>Ruellia bourgaei</i>          | GQ995639 |
| Eudicotyledons | Acanthaceae    | <i>Ruellia</i>      | <i>Ruellia bourgaei</i>          | GQ995640 |
| Eudicotyledons | Acanthaceae    | <i>Ruellia</i>      | <i>Ruellia konzattii</i>         | GQ995643 |
| Eudicotyledons | Acanthaceae    | <i>Ruellia</i>      | <i>Ruellia konzattii</i>         | GQ995644 |
| Eudicotyledons | Acanthaceae    | <i>Ruellia</i>      | <i>Ruellia konzattii</i>         | GQ995645 |
| Eudicotyledons | Acanthaceae    | <i>Ruellia</i>      | <i>Ruellia elegans</i>           | GQ995628 |

|                |             |                  |                             |          |
|----------------|-------------|------------------|-----------------------------|----------|
| Eudicotyledons | Acanthaceae | <i>Ruellia</i>   | <i>Ruellia elegans</i>      | GU003917 |
| Eudicotyledons | Acanthaceae | <i>Ruellia</i>   | <i>Ruellia jaliscana</i>    | GQ995652 |
| Eudicotyledons | Acanthaceae | <i>Ruellia</i>   | <i>Ruellia jaliscana</i>    | GQ995653 |
| Eudicotyledons | Acanthaceae | <i>Ruellia</i>   | <i>Ruellia jaliscana</i>    | GQ995654 |
| Eudicotyledons | Acanthaceae | <i>Ruellia</i>   | <i>Ruellia speciosa</i>     | GQ995661 |
| Eudicotyledons | Acanthaceae | <i>Ruellia</i>   | <i>Ruellia speciosa</i>     | GQ995662 |
| Eudicotyledons | Acanthaceae | <i>Ruellia</i>   | <i>Ruellia speciosa</i>     | GQ995663 |
| Eudicotyledons | Acanthaceae | <i>Ruellia</i>   | <i>Ruellia speciosa</i>     | GQ995664 |
| Eudicotyledons | Acanthaceae | <i>Ruellia</i>   | <i>Ruellia fruticosa</i>    | GQ995646 |
| Eudicotyledons | Acanthaceae | <i>Ruellia</i>   | <i>Ruellia fruticosa</i>    | GQ995647 |
| Eudicotyledons | Acanthaceae | <i>Ruellia</i>   | <i>Ruellia fruticosa</i>    | GQ995648 |
| Eudicotyledons | Acanthaceae | <i>Ruellia</i>   | <i>Ruellia fruticosa</i>    | GQ995649 |
| Eudicotyledons | Acanthaceae | <i>Ruellia</i>   | <i>Ruellia fruticosa</i>    | GQ995650 |
| Eudicotyledons | Malvaceae   | <i>Althaea</i>   | <i>Althaea armeniaca</i>    | EF679753 |
| Eudicotyledons | Malvaceae   | <i>Althaea</i>   | <i>Althaea armeniaca</i>    | EF419660 |
| Eudicotyledons | Malvaceae   | <i>Althaea</i>   | <i>Althaea cannabina</i>    | EF419657 |
| Eudicotyledons | Malvaceae   | <i>Althaea</i>   | <i>Althaea cannabina</i>    | EF419658 |
| Eudicotyledons | Malvaceae   | <i>Althaea</i>   | <i>Althaea cannabina</i>    | EF419659 |
| Eudicotyledons | Malvaceae   | <i>Althaea</i>   | <i>Althaea hirsuta</i>      | EF419620 |
| Eudicotyledons | Malvaceae   | <i>Althaea</i>   | <i>Althaea hirsuta</i>      | EF419621 |
| Eudicotyledons | Malvaceae   | <i>Althaea</i>   | <i>Althaea hirsuta</i>      | EF419622 |
| Eudicotyledons | Malvaceae   | <i>Althaea</i>   | <i>Althaea hirsuta</i>      | EF419623 |
| Eudicotyledons | Malvaceae   | <i>Althaea</i>   | <i>Althaea hirsuta</i>      | EF419624 |
| Eudicotyledons | Malvaceae   | <i>Althaea</i>   | <i>Althaea hirsuta</i>      | EF419625 |
| Eudicotyledons | Malvaceae   | <i>Althaea</i>   | <i>Althaea longiflora</i>   | EF419638 |
| Eudicotyledons | Malvaceae   | <i>Althaea</i>   | <i>Althaea longiflora</i>   | EF419639 |
| Eudicotyledons | Malvaceae   | <i>Althaea</i>   | <i>Althaea longiflora</i>   | EF419640 |
| Eudicotyledons | Malvaceae   | <i>Althaea</i>   | <i>Althaea ludwigii</i>     | EF419641 |
| Eudicotyledons | Malvaceae   | <i>Althaea</i>   | <i>Althaea ludwigii</i>     | EF419642 |
| Eudicotyledons | Malvaceae   | <i>Althaea</i>   | <i>Althaea ludwigii</i>     | EF419643 |
| Eudicotyledons | Oleaceae    | <i>Ligustrum</i> | <i>Ligustrum lucidum</i>    | GU135318 |
| Eudicotyledons | Oleaceae    | <i>Ligustrum</i> | <i>Ligustrum lucidum</i>    | FN675795 |
| Eudicotyledons | Oleaceae    | <i>Ligustrum</i> | <i>Ligustrum lucidum</i>    | JF830327 |
| Eudicotyledons | Oleaceae    | <i>Ligustrum</i> | <i>Ligustrum lucidum</i>    | JF830328 |
| Eudicotyledons | Oleaceae    | <i>Ligustrum</i> | <i>Ligustrum lucidum</i>    | JF830329 |
| Eudicotyledons | Oleaceae    | <i>Ligustrum</i> | <i>Ligustrum lucidum</i>    | JF830330 |
| Eudicotyledons | Oleaceae    | <i>Ligustrum</i> | <i>Ligustrum lucidum</i>    | JF830331 |
| Eudicotyledons | Oleaceae    | <i>Ligustrum</i> | <i>Ligustrum lucidum</i>    | JF830332 |
| Eudicotyledons | Oleaceae    | <i>Ligustrum</i> | <i>Ligustrum lucidum</i>    | JF830333 |
| Eudicotyledons | Oleaceae    | <i>Ligustrum</i> | <i>Ligustrum lucidum</i>    | JF830334 |
| Eudicotyledons | Oleaceae    | <i>Ligustrum</i> | <i>Ligustrum lucidum</i>    | JN045225 |
| Eudicotyledons | Oleaceae    | <i>Ligustrum</i> | <i>Ligustrum lucidum</i>    | JN045226 |
| Eudicotyledons | Oleaceae    | <i>Ligustrum</i> | <i>Ligustrum lucidum</i>    | JN045227 |
| Eudicotyledons | Oleaceae    | <i>Ligustrum</i> | <i>Ligustrum lucidum</i>    | JN045228 |
| Eudicotyledons | Oleaceae    | <i>Ligustrum</i> | <i>Ligustrum lucidum</i>    | JN045229 |
| Eudicotyledons | Paeoniaceae | <i>Paeonia</i>   | <i>Paeonia ludlowii</i>     | GU367371 |
| Eudicotyledons | Paeoniaceae | <i>Paeonia</i>   | <i>Paeonia ludlowii</i>     | JF496835 |
| Eudicotyledons | Asteraceae  | <i>Gazania</i>   | <i>Gazania caespitosa</i>   | EF556366 |
| Eudicotyledons | Asteraceae  | <i>Gazania</i>   | <i>Gazania caespitosa</i>   | EF556367 |
| Eudicotyledons | Asteraceae  | <i>Gazania</i>   | <i>Gazania heterochaeta</i> | EF556370 |
| Eudicotyledons | Asteraceae  | <i>Gazania</i>   | <i>Gazania heterochaeta</i> | EF556371 |
| Eudicotyledons | Asteraceae  | <i>Gazania</i>   | <i>Gazania leiopoda</i>     | EF556382 |
| Eudicotyledons | Asteraceae  | <i>Gazania</i>   | <i>Gazania leiopoda</i>     | EF556383 |

|                |              |                 |                               |          |
|----------------|--------------|-----------------|-------------------------------|----------|
| Eudicotyledons | Asteraceae   | <i>Gazania</i>  | <i>Gazania lichtensteinii</i> | EF556384 |
| Eudicotyledons | Asteraceae   | <i>Gazania</i>  | <i>Gazania lichtensteinii</i> | EF556385 |
| Eudicotyledons | Asteraceae   | <i>Gazania</i>  | <i>Gazania maritima</i>       | EF556390 |
| Eudicotyledons | Asteraceae   | <i>Gazania</i>  | <i>Gazania maritima</i>       | EF556391 |
| Eudicotyledons | Asteraceae   | <i>Gazania</i>  | <i>Gazania pectinata</i>      | EF556392 |
| Eudicotyledons | Asteraceae   | <i>Gazania</i>  | <i>Gazania pectinata</i>      | EF556393 |
| Eudicotyledons | Asteraceae   | <i>Gazania</i>  | <i>Gazania rigida</i>         | EF556400 |
| Eudicotyledons | Asteraceae   | <i>Gazania</i>  | <i>Gazania rigida</i>         | EF556401 |
| Eudicotyledons | Asteraceae   | <i>Gazania</i>  | <i>Gazania serrata</i>        | EF556403 |
| Eudicotyledons | Asteraceae   | <i>Gazania</i>  | <i>Gazania serrata</i>        | EF556404 |
| Eudicotyledons | Asteraceae   | <i>Gazania</i>  | <i>Gazania sp. NPB-2007</i>   | EF556407 |
| Eudicotyledons | Asteraceae   | <i>Gazania</i>  | <i>Gazania sp. NPB-2007</i>   | EF556408 |
| Eudicotyledons | Polygonaceae | <i>Bistorta</i> | <i>Bistorta macrophylla</i>   | JN046427 |
| Eudicotyledons | Polygonaceae | <i>Bistorta</i> | <i>Bistorta macrophylla</i>   | JN046428 |
| Eudicotyledons | Polygonaceae | <i>Bistorta</i> | <i>Bistorta macrophylla</i>   | JN046429 |
| Eudicotyledons | Polygonaceae | <i>Bistorta</i> | <i>Bistorta macrophylla</i>   | JN046430 |
| Eudicotyledons | Polygonaceae | <i>Bistorta</i> | <i>Bistorta macrophylla</i>   | JN046431 |
| Eudicotyledons | Polygonaceae | <i>Bistorta</i> | <i>Bistorta macrophylla</i>   | JN046432 |
| Eudicotyledons | Polygonaceae | <i>Bistorta</i> | <i>Bistorta macrophylla</i>   | JN046433 |
| Eudicotyledons | Polygonaceae | <i>Bistorta</i> | <i>Bistorta macrophylla</i>   | JN046434 |
| Eudicotyledons | Fabaceae     | <i>Inga</i>     | <i>Inga marginata</i>         | GQ118873 |
| Eudicotyledons | Fabaceae     | <i>Inga</i>     | <i>Inga marginata</i>         | GQ982255 |
| Eudicotyledons | Fabaceae     | <i>Inga</i>     | <i>Inga marginata</i>         | AM922030 |
| Eudicotyledons | Fabaceae     | <i>Inga</i>     | <i>Inga marginata</i>         | AM922031 |
| Eudicotyledons | Fabaceae     | <i>Inga</i>     | <i>Inga marginata</i>         | AM922032 |
| Eudicotyledons | Fabaceae     | <i>Inga</i>     | <i>Inga marginata</i>         | AM922033 |
| Eudicotyledons | Fabaceae     | <i>Inga</i>     | <i>Inga acreana</i>           | GQ118861 |
| Eudicotyledons | Fabaceae     | <i>Inga</i>     | <i>Inga acreana</i>           | GQ428678 |
| Eudicotyledons | Fabaceae     | <i>Inga</i>     | <i>Inga acreana</i>           | FJ038935 |
| Eudicotyledons | Fabaceae     | <i>Inga</i>     | <i>Inga acuminata</i>         | GQ118862 |
| Eudicotyledons | Fabaceae     | <i>Inga</i>     | <i>Inga acuminata</i>         | GQ982251 |
| Eudicotyledons | Fabaceae     | <i>Inga</i>     | <i>Inga acuminata</i>         | AM922015 |
| Eudicotyledons | Fabaceae     | <i>Inga</i>     | <i>Inga auristellae</i>       | GQ118865 |
| Eudicotyledons | Fabaceae     | <i>Inga</i>     | <i>Inga auristellae</i>       | AM922016 |
| Eudicotyledons | Fabaceae     | <i>Inga</i>     | <i>Inga bourgonii</i>         | GQ118866 |
| Eudicotyledons | Fabaceae     | <i>Inga</i>     | <i>Inga bourgonii</i>         | AM922017 |
| Eudicotyledons | Fabaceae     | <i>Inga</i>     | <i>Inga cocleensis</i>        | GQ118869 |
| Eudicotyledons | Fabaceae     | <i>Inga</i>     | <i>Inga cocleensis</i>        | GQ982252 |
| Eudicotyledons | Fabaceae     | <i>Inga</i>     | <i>Inga feuillei</i>          | AM922022 |
| Eudicotyledons | Fabaceae     | <i>Inga</i>     | <i>Inga feuillei</i>          | AM922023 |
| Eudicotyledons | Fabaceae     | <i>Inga</i>     | <i>Inga feuillei</i>          | AM922024 |
| Eudicotyledons | Fabaceae     | <i>Inga</i>     | <i>Inga goldmanii</i>         | GQ118871 |
| Eudicotyledons | Fabaceae     | <i>Inga</i>     | <i>Inga goldmanii</i>         | GQ982253 |
| Eudicotyledons | Fabaceae     | <i>Inga</i>     | <i>Inga goldmanii</i>         | AM922025 |
| Eudicotyledons | Fabaceae     | <i>Inga</i>     | <i>Inga leiocalycina</i>      | FJ038941 |
| Eudicotyledons | Fabaceae     | <i>Inga</i>     | <i>Inga leiocalycina</i>      | AM922028 |
| Eudicotyledons | Fabaceae     | <i>Inga</i>     | <i>Inga multijuga</i>         | GQ118878 |
| Eudicotyledons | Fabaceae     | <i>Inga</i>     | <i>Inga multijuga</i>         | AM922034 |
| Eudicotyledons | Fabaceae     | <i>Inga</i>     | <i>Inga multijuga</i>         | AM922035 |
| Eudicotyledons | Fabaceae     | <i>Inga</i>     | <i>Inga nobilis</i>           | GQ118879 |
| Eudicotyledons | Fabaceae     | <i>Inga</i>     | <i>Inga nobilis</i>           | GQ982256 |
| Eudicotyledons | Fabaceae     | <i>Inga</i>     | <i>Inga nobilis</i>           | AM922036 |
| Eudicotyledons | Fabaceae     | <i>Inga</i>     | <i>Inga nobilis</i>           | AM922037 |

|                |                 |                   |                                  |          |
|----------------|-----------------|-------------------|----------------------------------|----------|
| Eudicotyledons | Fabaceae        | <i>Inga</i>       | <i>Inga nobilis</i>              | AM922038 |
| Eudicotyledons | Fabaceae        | <i>Inga</i>       | <i>Inga pezizifera</i>           | GQ118880 |
| Eudicotyledons | Fabaceae        | <i>Inga</i>       | <i>Inga pezizifera</i>           | GQ982258 |
| Eudicotyledons | Fabaceae        | <i>Inga</i>       | <i>Inga ruiziana</i>             | GQ118883 |
| Eudicotyledons | Fabaceae        | <i>Inga</i>       | <i>Inga ruiziana</i>             | GQ982260 |
| Eudicotyledons | Fabaceae        | <i>Inga</i>       | <i>Inga sapindoides</i>          | GQ118884 |
| Eudicotyledons | Fabaceae        | <i>Inga</i>       | <i>Inga sapindoides</i>          | GQ982261 |
| Eudicotyledons | Fabaceae        | <i>Inga</i>       | <i>Inga sapindoides</i>          | AM922047 |
| Eudicotyledons | Fabaceae        | <i>Inga</i>       | <i>Inga sapindoides</i>          | AM922049 |
| Eudicotyledons | Fabaceae        | <i>Inga</i>       | <i>Inga sapindoides</i>          | AM922050 |
| Eudicotyledons | Fabaceae        | <i>Inga</i>       | <i>Inga spectabilis</i>          | GQ982262 |
| Eudicotyledons | Fabaceae        | <i>Inga</i>       | <i>Inga spectabilis</i>          | AM922055 |
| Eudicotyledons | Fabaceae        | <i>Inga</i>       | <i>Inga tenuistipula</i>         | GQ118885 |
| Eudicotyledons | Fabaceae        | <i>Inga</i>       | <i>Inga tenuistipula</i>         | AM922056 |
| Eudicotyledons | Fabaceae        | <i>Inga</i>       | <i>Inga thibaudiana</i>          | GQ118886 |
| Eudicotyledons | Fabaceae        | <i>Inga</i>       | <i>Inga thibaudiana</i>          | GQ982263 |
| Eudicotyledons | Fabaceae        | <i>Inga</i>       | <i>Inga umbellifera</i>          | GQ118888 |
| Eudicotyledons | Fabaceae        | <i>Inga</i>       | <i>Inga umbellifera</i>          | GQ982264 |
| Eudicotyledons | Fabaceae        | <i>Inga</i>       | <i>Inga umbellifera</i>          | AM922057 |
| Eudicotyledons | Fabaceae        | <i>Inga</i>       | <i>Inga umbellifera</i>          | AM922058 |
| Eudicotyledons | Fabaceae        | <i>Inga</i>       | <i>Inga vera</i>                 | GQ118890 |
| Eudicotyledons | Fabaceae        | <i>Inga</i>       | <i>Inga vera</i>                 | HM446947 |
| Eudicotyledons | Fabaceae        | <i>Inga</i>       | <i>Inga laurina</i>              | GQ118877 |
| Eudicotyledons | Fabaceae        | <i>Inga</i>       | <i>Inga laurina</i>              | GQ982254 |
| Eudicotyledons | Fabaceae        | <i>Inga</i>       | <i>Inga laurina</i>              | AM922044 |
| Eudicotyledons | Fabaceae        | <i>Inga</i>       | <i>Inga laurina</i>              | AM922045 |
| Eudicotyledons | Fabaceae        | <i>Inga</i>       | <i>Inga laurina</i>              | AM922046 |
| Eudicotyledons | Fabaceae        | <i>Inga</i>       | <i>Inga laurina</i>              | HM446946 |
| Eudicotyledons | Euphorbiaceae   | <i>Croton</i>     | <i>Croton megalobotrys</i>       | EU213806 |
| Eudicotyledons | Euphorbiaceae   | <i>Croton</i>     | <i>Croton megalobotrys</i>       | EU213807 |
| Eudicotyledons | Euphorbiaceae   | <i>Croton</i>     | <i>Croton megalobotrys</i>       | EU213808 |
| Eudicotyledons | Euphorbiaceae   | <i>Croton</i>     | <i>Croton pseudopulchellus</i>   | EU213809 |
| Eudicotyledons | Euphorbiaceae   | <i>Croton</i>     | <i>Croton pseudopulchellus</i>   | EU213810 |
| Eudicotyledons | Euphorbiaceae   | <i>Croton</i>     | <i>Croton pseudopulchellus</i>   | EU213811 |
| Eudicotyledons | Asteraceae      | <i>Tragopogon</i> | <i>Tragopogon buphthalmoides</i> | EU391967 |
| Eudicotyledons | Asteraceae      | <i>Tragopogon</i> | <i>Tragopogon buphthalmoides</i> | EU391968 |
| Eudicotyledons | Melastomataceae | <i>Melastoma</i>  | <i>Melastoma tetramerum</i>      | AB443945 |
| Eudicotyledons | Melastomataceae | <i>Melastoma</i>  | <i>Melastoma tetramerum</i>      | AB443946 |
| Eudicotyledons | Oleaceae        | <i>Ligustrum</i>  | <i>Ligustrum quihoui</i>         | GQ435224 |
| Eudicotyledons | Oleaceae        | <i>Ligustrum</i>  | <i>Ligustrum quihoui</i>         | JF830270 |
| Eudicotyledons | Oleaceae        | <i>Ligustrum</i>  | <i>Ligustrum quihoui</i>         | JF830271 |
| Eudicotyledons | Oleaceae        | <i>Ligustrum</i>  | <i>Ligustrum quihoui</i>         | JF830272 |
| Eudicotyledons | Oleaceae        | <i>Ligustrum</i>  | <i>Ligustrum quihoui</i>         | JF830273 |
| Eudicotyledons | Oleaceae        | <i>Ligustrum</i>  | <i>Ligustrum quihoui</i>         | JF830274 |
| Eudicotyledons | Oleaceae        | <i>Ligustrum</i>  | <i>Ligustrum quihoui</i>         | JF830275 |
| Eudicotyledons | Oleaceae        | <i>Ligustrum</i>  | <i>Ligustrum quihoui</i>         | JN045234 |
| Eudicotyledons | Oleaceae        | <i>Ligustrum</i>  | <i>Ligustrum quihoui</i>         | JN045235 |
| Eudicotyledons | Cactaceae       | <i>Opuntia</i>    | <i>Opuntia joconostle</i>        | EU930406 |
| Eudicotyledons | Cactaceae       | <i>Opuntia</i>    | <i>Opuntia joconostle</i>        | EU930407 |
| Eudicotyledons | Oleaceae        | <i>Picconia</i>   | <i>Picconia azorica</i>          | EU854410 |
| Eudicotyledons | Oleaceae        | <i>Picconia</i>   | <i>Picconia azorica</i>          | EU854411 |
| Eudicotyledons | Oleaceae        | <i>Picconia</i>   | <i>Picconia azorica</i>          | EU854412 |
| Eudicotyledons | Oleaceae        | <i>Picconia</i>   | <i>Picconia azorica</i>          | EU854413 |

|                |           |                   |                                                       |          |
|----------------|-----------|-------------------|-------------------------------------------------------|----------|
| Eudicotyledons | Oleaceae  | <i>Picconia</i>   | <i>Picconia azorica</i>                               | EU854414 |
| Eudicotyledons | Oleaceae  | <i>Picconia</i>   | <i>Picconia azorica</i>                               | EU854415 |
| Eudicotyledons | Oleaceae  | <i>Picconia</i>   | <i>Picconia azorica</i>                               | EU854416 |
| Eudicotyledons | Rosaceae  | <i>Cliffortia</i> | <i>Cliffortia amplexistipula</i>                      | EU937660 |
| Eudicotyledons | Rosaceae  | <i>Cliffortia</i> | <i>Cliffortia amplexistipula</i>                      | EU937661 |
| Eudicotyledons | Rosaceae  | <i>Cliffortia</i> | <i>Cliffortia arborea</i>                             | EU937569 |
| Eudicotyledons | Rosaceae  | <i>Cliffortia</i> | <i>Cliffortia arborea</i>                             | EU937570 |
| Eudicotyledons | Rosaceae  | <i>Cliffortia</i> | <i>Cliffortia erectisepala</i>                        | EU937643 |
| Eudicotyledons | Rosaceae  | <i>Cliffortia</i> | <i>Cliffortia erectisepala</i>                        | EU937644 |
| Eudicotyledons | Rosaceae  | <i>Cliffortia</i> | <i>Cliffortia eriocephalina</i>                       | EU937573 |
| Eudicotyledons | Rosaceae  | <i>Cliffortia</i> | <i>Cliffortia eriocephalina</i>                       | EU937574 |
| Eudicotyledons | Rosaceae  | <i>Cliffortia</i> | <i>Cliffortia ferruginea</i>                          | EU937603 |
| Eudicotyledons | Rosaceae  | <i>Cliffortia</i> | <i>Cliffortia ferruginea</i>                          | EU937604 |
| Eudicotyledons | Rosaceae  | <i>Cliffortia</i> | <i>Cliffortia integerrima</i>                         | EU937629 |
| Eudicotyledons | Rosaceae  | <i>Cliffortia</i> | <i>Cliffortia integerrima</i>                         | EU937630 |
| Eudicotyledons | Rosaceae  | <i>Cliffortia</i> | <i>Cliffortia intermedia</i>                          | EU937624 |
| Eudicotyledons | Rosaceae  | <i>Cliffortia</i> | <i>Cliffortia intermedia</i>                          | EU937625 |
| Eudicotyledons | Rosaceae  | <i>Cliffortia</i> | <i>Cliffortia linearifolia</i>                        | EU937691 |
| Eudicotyledons | Rosaceae  | <i>Cliffortia</i> | <i>Cliffortia linearifolia</i>                        | EU937692 |
| Eudicotyledons | Rosaceae  | <i>Cliffortia</i> | <i>Cliffortia marginata</i>                           | EU937668 |
| Eudicotyledons | Rosaceae  | <i>Cliffortia</i> | <i>Cliffortia marginata</i>                           | EU937669 |
| Eudicotyledons | Rosaceae  | <i>Cliffortia</i> | <i>Cliffortia montana</i>                             | EU937576 |
| Eudicotyledons | Rosaceae  | <i>Cliffortia</i> | <i>Cliffortia montana</i>                             | EU937577 |
| Eudicotyledons | Rosaceae  | <i>Cliffortia</i> | <i>Cliffortia ramosissima</i>                         | EU937715 |
| Eudicotyledons | Rosaceae  | <i>Cliffortia</i> | <i>Cliffortia ramosissima</i>                         | EU937716 |
| Eudicotyledons | Rosaceae  | <i>Cliffortia</i> | <i>Cliffortia ruscifolia x Cliffortia teretifolia</i> | EU937726 |
| Eudicotyledons | Rosaceae  | <i>Cliffortia</i> | <i>Cliffortia ruscifolia x Cliffortia teretifolia</i> | EU937727 |
| Eudicotyledons | Cactaceae | <i>Opuntia</i>    | <i>Opuntia megacantha</i>                             | EU930403 |
| Eudicotyledons | Cactaceae | <i>Opuntia</i>    | <i>Opuntia megacantha</i>                             | EU930409 |
| Eudicotyledons | Cactaceae | <i>Opuntia</i>    | <i>Opuntia megacantha</i>                             | EU930413 |
| Eudicotyledons | Cactaceae | <i>Opuntia</i>    | <i>Opuntia megacantha</i>                             | EU930415 |
| Eudicotyledons | Cactaceae | <i>Opuntia</i>    | <i>Opuntia megacantha</i>                             | EU930416 |
| Eudicotyledons | Ericaceae | <i>Gaultheria</i> | <i>Gaultheria dumicola</i>                            | JN044571 |
| Eudicotyledons | Ericaceae | <i>Gaultheria</i> | <i>Gaultheria dumicola</i>                            | JN044572 |
| Eudicotyledons | Ericaceae | <i>Gaultheria</i> | <i>Gaultheria dumicola</i>                            | JN044573 |
| Eudicotyledons | Ericaceae | <i>Gaultheria</i> | <i>Gaultheria dumicola</i>                            | JN044574 |
| Eudicotyledons | Ericaceae | <i>Gaultheria</i> | <i>Gaultheria dumicola</i>                            | JN044575 |
| Eudicotyledons | Ericaceae | <i>Gaultheria</i> | <i>Gaultheria dumicola</i>                            | JN044576 |
| Eudicotyledons | Ericaceae | <i>Gaultheria</i> | <i>Gaultheria dumicola</i>                            | JN044577 |
| Eudicotyledons | Ericaceae | <i>Gaultheria</i> | <i>Gaultheria fragrantissima</i>                      | JN044580 |
| Eudicotyledons | Ericaceae | <i>Gaultheria</i> | <i>Gaultheria fragrantissima</i>                      | JN044581 |
| Eudicotyledons | Ericaceae | <i>Gaultheria</i> | <i>Gaultheria fragrantissima</i>                      | JN044582 |
| Eudicotyledons | Ericaceae | <i>Gaultheria</i> | <i>Gaultheria fragrantissima</i>                      | JN044583 |
| Eudicotyledons | Ericaceae | <i>Gaultheria</i> | <i>Gaultheria fragrantissima</i>                      | JN044584 |
| Eudicotyledons | Ericaceae | <i>Gaultheria</i> | <i>Gaultheria fragrantissima</i>                      | JN044585 |
| Eudicotyledons | Ericaceae | <i>Gaultheria</i> | <i>Gaultheria fragrantissima</i>                      | JN044586 |
| Eudicotyledons | Ericaceae | <i>Gaultheria</i> | <i>Gaultheria fragrantissima</i>                      | JN044587 |
| Eudicotyledons | Ericaceae | <i>Gaultheria</i> | <i>Gaultheria fragrantissima</i>                      | JN044588 |
| Eudicotyledons | Ericaceae | <i>Gaultheria</i> | <i>Gaultheria fragrantissima</i>                      | JN044589 |
| Eudicotyledons | Ericaceae | <i>Gaultheria</i> | <i>Gaultheria fragrantissima</i>                      | JN044590 |
| Eudicotyledons | Ericaceae | <i>Gaultheria</i> | <i>Gaultheria fragrantissima</i>                      | JN044591 |
| Eudicotyledons | Ericaceae | <i>Gaultheria</i> | <i>Gaultheria fragrantissima</i>                      | JN044592 |
| Eudicotyledons | Ericaceae | <i>Gaultheria</i> | <i>Gaultheria fragrantissima</i>                      | JN044593 |

|                |            |                      |                                     |          |
|----------------|------------|----------------------|-------------------------------------|----------|
| Eudicotyledons | Ericaceae  | <i>Gaultheria</i>    | <i>Gaultheria fragrantissima</i>    | JN044594 |
| Eudicotyledons | Ericaceae  | <i>Gaultheria</i>    | <i>Gaultheria fragrantissima</i>    | JN044595 |
| Eudicotyledons | Ericaceae  | <i>Gaultheria</i>    | <i>Gaultheria fragrantissima</i>    | JN044596 |
| Eudicotyledons | Ericaceae  | <i>Gaultheria</i>    | <i>Gaultheria griffithiana</i>      | JN044597 |
| Eudicotyledons | Ericaceae  | <i>Gaultheria</i>    | <i>Gaultheria griffithiana</i>      | JN044598 |
| Eudicotyledons | Ericaceae  | <i>Gaultheria</i>    | <i>Gaultheria griffithiana</i>      | JN044599 |
| Eudicotyledons | Ericaceae  | <i>Gaultheria</i>    | <i>Gaultheria griffithiana</i>      | JN044600 |
| Eudicotyledons | Ericaceae  | <i>Gaultheria</i>    | <i>Gaultheria griffithiana</i>      | JN044601 |
| Eudicotyledons | Ericaceae  | <i>Gaultheria</i>    | <i>Gaultheria griffithiana</i>      | JN044602 |
| Eudicotyledons | Ericaceae  | <i>Gaultheria</i>    | <i>Gaultheria griffithiana</i>      | JN044603 |
| Eudicotyledons | Ericaceae  | <i>Gaultheria</i>    | <i>Gaultheria griffithiana</i>      | JN044604 |
| Eudicotyledons | Ericaceae  | <i>Gaultheria</i>    | <i>Gaultheria griffithiana</i>      | JN044605 |
| Eudicotyledons | Ericaceae  | <i>Gaultheria</i>    | <i>Gaultheria griffithiana</i>      | JN044606 |
| Eudicotyledons | Ericaceae  | <i>Gaultheria</i>    | <i>Gaultheria griffithiana</i>      | JN044607 |
| Eudicotyledons | Ericaceae  | <i>Gaultheria</i>    | <i>Gaultheria griffithiana</i>      | JN044608 |
| Eudicotyledons | Ericaceae  | <i>Gaultheria</i>    | <i>Gaultheria hookeri</i>           | JN044613 |
| Eudicotyledons | Ericaceae  | <i>Gaultheria</i>    | <i>Gaultheria hookeri</i>           | JN044614 |
| Eudicotyledons | Ericaceae  | <i>Gaultheria</i>    | <i>Gaultheria hookeri</i>           | JN044615 |
| Eudicotyledons | Ericaceae  | <i>Gaultheria</i>    | <i>Gaultheria hookeri</i>           | JN044616 |
| Eudicotyledons | Ericaceae  | <i>Gaultheria</i>    | <i>Gaultheria hookeri</i>           | JN044617 |
| Eudicotyledons | Ericaceae  | <i>Gaultheria</i>    | <i>Gaultheria hookeri</i>           | JN044618 |
| Eudicotyledons | Ericaceae  | <i>Gaultheria</i>    | <i>Gaultheria hookeri</i>           | JN044619 |
| Eudicotyledons | Ericaceae  | <i>Gaultheria</i>    | <i>Gaultheria sinensis</i>          | JN044690 |
| Eudicotyledons | Ericaceae  | <i>Gaultheria</i>    | <i>Gaultheria sinensis</i>          | JN044691 |
| Eudicotyledons | Ericaceae  | <i>Gaultheria</i>    | <i>Gaultheria sinensis</i>          | JN044692 |
| Eudicotyledons | Ericaceae  | <i>Gaultheria</i>    | <i>Gaultheria sinensis</i>          | JN044693 |
| Eudicotyledons | Ericaceae  | <i>Gaultheria</i>    | <i>Gaultheria sinensis</i>          | JN044694 |
| Eudicotyledons | Ericaceae  | <i>Gaultheria</i>    | <i>Gaultheria sinensis</i>          | JN044695 |
| Eudicotyledons | Ericaceae  | <i>Gaultheria</i>    | <i>Gaultheria sinensis</i>          | JN044696 |
| Eudicotyledons | Ericaceae  | <i>Gaultheria</i>    | <i>Gaultheria sinensis</i>          | JN044697 |
| Eudicotyledons | Ericaceae  | <i>Gaultheria</i>    | <i>Gaultheria wardii</i>            | JN044722 |
| Eudicotyledons | Ericaceae  | <i>Gaultheria</i>    | <i>Gaultheria wardii</i>            | JN044723 |
| Eudicotyledons | Ericaceae  | <i>Gaultheria</i>    | <i>Gaultheria wardii</i>            | JN044724 |
| Eudicotyledons | Ericaceae  | <i>Gaultheria</i>    | <i>Gaultheria wardii</i>            | JN044725 |
| Eudicotyledons | Ericaceae  | <i>Gaultheria</i>    | <i>Gaultheria wardii</i>            | JN044726 |
| Eudicotyledons | Ericaceae  | <i>Gaultheria</i>    | <i>Gaultheria wardii</i>            | JN044727 |
| Eudicotyledons | Ericaceae  | <i>Gaultheria</i>    | <i>Gaultheria wardii</i>            | JN044728 |
| Eudicotyledons | Ericaceae  | <i>Gaultheria</i>    | <i>Gaultheria wardii</i>            | JN044729 |
| Eudicotyledons | Ericaceae  | <i>Gaultheria</i>    | <i>Gaultheria wardii</i>            | JN044730 |
| Eudicotyledons | Ericaceae  | <i>Gaultheria</i>    | <i>Gaultheria wardii</i>            | JN044731 |
| Eudicotyledons | Ericaceae  | <i>Gaultheria</i>    | <i>Gaultheria wardii</i>            | JN044732 |
| Eudicotyledons | Ericaceae  | <i>Gaultheria</i>    | <i>Gaultheria wardii</i>            | JN044733 |
| Eudicotyledons | Violaceae  | <i>Viola</i>         | <i>Viola prionantha</i>             | GQ435053 |
| Eudicotyledons | Violaceae  | <i>Viola</i>         | <i>Viola prionantha</i>             | HM483589 |
| Eudicotyledons | Sapotaceae | <i>Chrysophyllum</i> | <i>Chrysophyllum sanguinolentum</i> | FJ039055 |
| Eudicotyledons | Sapotaceae | <i>Chrysophyllum</i> | <i>Chrysophyllum sanguinolentum</i> | FJ039056 |
| Eudicotyledons | Ebenaceae  | <i>Diospyros</i>     | <i>Diospyros capreifolia</i>        | GQ428662 |
| Eudicotyledons | Ebenaceae  | <i>Diospyros</i>     | <i>Diospyros capreifolia</i>        | GQ428664 |
| Eudicotyledons | Ebenaceae  | <i>Diospyros</i>     | <i>Diospyros capreifolia</i>        | FJ038911 |
| Eudicotyledons | Ebenaceae  | <i>Diospyros</i>     | <i>Diospyros carbonaria</i>         | GQ428663 |
| Eudicotyledons | Ebenaceae  | <i>Diospyros</i>     | <i>Diospyros carbonaria</i>         | FJ038912 |
| Eudicotyledons | Fabaceae   | <i>Inga</i>          | <i>Inga brachystachys</i>           | GQ428677 |
| Eudicotyledons | Fabaceae   | <i>Inga</i>          | <i>Inga brachystachys</i>           | FJ038939 |



|                |             |                   |                                 |          |
|----------------|-------------|-------------------|---------------------------------|----------|
| Eudicotyledons | Fabaceae    | <i>Inga</i>       | <i>Inga huberi</i>              | GQ428684 |
| Eudicotyledons | Fabaceae    | <i>Inga</i>       | <i>Inga huberi</i>              | FJ038940 |
| Eudicotyledons | Fabaceae    | <i>Inga</i>       | <i>Inga nouragensis</i>         | GQ428682 |
| Eudicotyledons | Fabaceae    | <i>Inga</i>       | <i>Inga nouragensis</i>         | GQ428683 |
| Eudicotyledons | Fabaceae    | <i>Inga</i>       | <i>Inga paraensis</i>           | GQ428676 |
| Eudicotyledons | Fabaceae    | <i>Inga</i>       | <i>Inga paraensis</i>           | FJ038937 |
| Eudicotyledons | Fabaceae    | <i>Inga</i>       | <i>Inga paraensis</i>           | FJ038938 |
| Eudicotyledons | Burseraceae | <i>Protium</i>    | <i>Protium gallicum</i>         | GQ428759 |
| Eudicotyledons | Burseraceae | <i>Protium</i>    | <i>Protium gallicum</i>         | FJ038873 |
| Eudicotyledons | Burseraceae | <i>Protium</i>    | <i>Protium gallicum</i>         | FJ038874 |
| Eudicotyledons | Ericaceae   | <i>Enkianthus</i> | <i>Enkianthus quinqueflorus</i> | HQ415415 |
| Eudicotyledons | Ericaceae   | <i>Enkianthus</i> | <i>Enkianthus quinqueflorus</i> | JN044465 |
| Eudicotyledons | Ericaceae   | <i>Enkianthus</i> | <i>Enkianthus quinqueflorus</i> | JN044466 |
| Eudicotyledons | Ericaceae   | <i>Enkianthus</i> | <i>Enkianthus quinqueflorus</i> | JN044467 |
| Eudicotyledons | Ericaceae   | <i>Enkianthus</i> | <i>Enkianthus quinqueflorus</i> | JN044468 |
| Eudicotyledons | Ericaceae   | <i>Enkianthus</i> | <i>Enkianthus quinqueflorus</i> | JN044469 |
| Eudicotyledons | Fabaceae    | <i>Inga</i>       | <i>Inga alba</i>                | GQ118864 |
| Eudicotyledons | Fabaceae    | <i>Inga</i>       | <i>Inga alba</i>                | GQ428679 |
| Eudicotyledons | Onagraceae  | <i>Epilobium</i>  | <i>Epilobium palustre</i>       | JN044479 |
| Eudicotyledons | Onagraceae  | <i>Epilobium</i>  | <i>Epilobium palustre</i>       | JN129840 |
| Eudicotyledons | Primulaceae | <i>Ardisia</i>    | <i>Ardisia standleyana</i>      | GQ982151 |
| Eudicotyledons | Primulaceae | <i>Ardisia</i>    | <i>Ardisia standleyana</i>      | GQ982152 |
| Eudicotyledons | Salicaceae  | <i>Casearia</i>   | <i>Casearia guianensis</i>      | GQ982169 |
| Eudicotyledons | Salicaceae  | <i>Casearia</i>   | <i>Casearia guianensis</i>      | HM446897 |
| Eudicotyledons | Asteraceae  | <i>Tolpis</i>     | <i>Tolpis glabrescens</i>       | GU046625 |
| Eudicotyledons | Asteraceae  | <i>Tolpis</i>     | <i>Tolpis glabrescens</i>       | GU046626 |
| Eudicotyledons | Asteraceae  | <i>Tolpis</i>     | <i>Tolpis lagopoda</i>          | GU046628 |
| Eudicotyledons | Asteraceae  | <i>Tolpis</i>     | <i>Tolpis lagopoda</i>          | GU046629 |
| Eudicotyledons | Asteraceae  | <i>Tolpis</i>     | <i>Tolpis sp. 5 MEM-2009</i>    | GU046636 |
| Eudicotyledons | Asteraceae  | <i>Tolpis</i>     | <i>Tolpis sp. 5 MEM-2009</i>    | GU046637 |
| Eudicotyledons | Asteraceae  | <i>Tolpis</i>     | <i>Tolpis webbii</i>            | GU046631 |
| Eudicotyledons | Asteraceae  | <i>Tolpis</i>     | <i>Tolpis webbii</i>            | GU046632 |
| Eudicotyledons | Rosaceae    | <i>Pyracantha</i> | <i>Pyracantha angustifolia</i>  | JQ390760 |
| Eudicotyledons | Rosaceae    | <i>Pyracantha</i> | <i>Pyracantha angustifolia</i>  | JN046699 |
| Eudicotyledons | Rosaceae    | <i>Pyracantha</i> | <i>Pyracantha angustifolia</i>  | JN046700 |
| Eudicotyledons | Rosaceae    | <i>Pyracantha</i> | <i>Pyracantha angustifolia</i>  | JN046701 |
| Eudicotyledons | Rosaceae    | <i>Pyracantha</i> | <i>Pyracantha angustifolia</i>  | JN046702 |
| Eudicotyledons | Rosaceae    | <i>Pyracantha</i> | <i>Pyracantha angustifolia</i>  | JN046703 |
| Eudicotyledons | Rosaceae    | <i>Pyracantha</i> | <i>Pyracantha angustifolia</i>  | JN046704 |
| Eudicotyledons | Rosaceae    | <i>Pyracantha</i> | <i>Pyracantha angustifolia</i>  | JN046705 |
| Eudicotyledons | Acanthaceae | <i>Ruellia</i>    | <i>Ruellia tweediana</i>        | GU135339 |
| Eudicotyledons | Acanthaceae | <i>Ruellia</i>    | <i>Ruellia tweediana</i>        | GU135437 |
| Eudicotyledons | Ericaceae   | <i>Erica</i>      | <i>Erica trimera</i>            | GU323906 |
| Eudicotyledons | Ericaceae   | <i>Erica</i>      | <i>Erica trimera</i>            | GU323907 |
| Eudicotyledons | Ericaceae   | <i>Erica</i>      | <i>Erica trimera</i>            | GU323908 |
| Eudicotyledons | Ericaceae   | <i>Erica</i>      | <i>Erica trimera</i>            | GU323909 |
| Eudicotyledons | Vitaceae    | <i>Ampelopsis</i> | <i>Ampelopsis japonica</i>      | JQ182491 |
| Eudicotyledons | Vitaceae    | <i>Ampelopsis</i> | <i>Ampelopsis japonica</i>      | JF437071 |
| Eudicotyledons | Cactaceae   | <i>Lepismium</i>  | <i>Lepismium lorentzianum</i>   | FN669015 |
| Eudicotyledons | Cactaceae   | <i>Lepismium</i>  | <i>Lepismium lorentzianum</i>   | FN669017 |
| Eudicotyledons | Cactaceae   | <i>Lepismium</i>  | <i>Lepismium lumbricoides</i>   | FN669009 |
| Eudicotyledons | Cactaceae   | <i>Lepismium</i>  | <i>Lepismium lumbricoides</i>   | FN669010 |
| Eudicotyledons | Cactaceae   | <i>Lepismium</i>  | <i>Lepismium lumbricoides</i>   | FN669011 |

|                |               |                   |                                |          |
|----------------|---------------|-------------------|--------------------------------|----------|
| Eudicotyledons | Cactaceae     | <i>Rhipsalis</i>  | <i>Rhipsalis baccifera</i>     | FN995435 |
| Eudicotyledons | Cactaceae     | <i>Rhipsalis</i>  | <i>Rhipsalis baccifera</i>     | FN669073 |
| Eudicotyledons | Cactaceae     | <i>Rhipsalis</i>  | <i>Rhipsalis baccifera</i>     | FN669079 |
| Eudicotyledons | Cactaceae     | <i>Rhipsalis</i>  | <i>Rhipsalis elliptica</i>     | FN669087 |
| Eudicotyledons | Cactaceae     | <i>Rhipsalis</i>  | <i>Rhipsalis elliptica</i>     | FN669089 |
| Eudicotyledons | Cactaceae     | <i>Rhipsalis</i>  | <i>Rhipsalis grandiflora</i>   | FN669040 |
| Eudicotyledons | Cactaceae     | <i>Rhipsalis</i>  | <i>Rhipsalis grandiflora</i>   | FN669041 |
| Eudicotyledons | Cactaceae     | <i>Rhipsalis</i>  | <i>Rhipsalis grandiflora</i>   | FN669042 |
| Eudicotyledons | Cactaceae     | <i>Rhipsalis</i>  | <i>Rhipsalis grandiflora</i>   | FN669081 |
| Eudicotyledons | Cactaceae     | <i>Rhipsalis</i>  | <i>Rhipsalis micrantha</i>     | FN669097 |
| Eudicotyledons | Cactaceae     | <i>Rhipsalis</i>  | <i>Rhipsalis micrantha</i>     | FN669098 |
| Eudicotyledons | Cactaceae     | <i>Rhipsalis</i>  | <i>Rhipsalis oblonga</i>       | FN669088 |
| Eudicotyledons | Cactaceae     | <i>Rhipsalis</i>  | <i>Rhipsalis oblonga</i>       | FN669100 |
| Eudicotyledons | Cactaceae     | <i>Rhipsalis</i>  | <i>Rhipsalis occidentalis</i>  | FN669090 |
| Eudicotyledons | Cactaceae     | <i>Rhipsalis</i>  | <i>Rhipsalis occidentalis</i>  | FN669091 |
| Eudicotyledons | Cactaceae     | <i>Rhipsalis</i>  | <i>Rhipsalis pachyptera</i>    | FN669055 |
| Eudicotyledons | Cactaceae     | <i>Rhipsalis</i>  | <i>Rhipsalis pachyptera</i>    | FN669057 |
| Eudicotyledons | Cactaceae     | <i>Rhipsalis</i>  | <i>Rhipsalis pentaptera</i>    | FN669102 |
| Eudicotyledons | Cactaceae     | <i>Rhipsalis</i>  | <i>Rhipsalis pentaptera</i>    | FN669103 |
| Eudicotyledons | Cactaceae     | <i>Rhipsalis</i>  | <i>Rhipsalis pilocarpa</i>     | FN669058 |
| Eudicotyledons | Cactaceae     | <i>Rhipsalis</i>  | <i>Rhipsalis pilocarpa</i>     | FN669059 |
| Eudicotyledons | Cactaceae     | <i>Rhipsalis</i>  | <i>Rhipsalis puniceodiscus</i> | FN669108 |
| Eudicotyledons | Cactaceae     | <i>Rhipsalis</i>  | <i>Rhipsalis puniceodiscus</i> | FN669109 |
| Eudicotyledons | Ericaceae     | <i>Cassiope</i>   | <i>Cassiope dendrotricha</i>   | JN044173 |
| Eudicotyledons | Ericaceae     | <i>Cassiope</i>   | <i>Cassiope dendrotricha</i>   | JN044174 |
| Eudicotyledons | Ericaceae     | <i>Cassiope</i>   | <i>Cassiope pectinata</i>      | JN044179 |
| Eudicotyledons | Ericaceae     | <i>Cassiope</i>   | <i>Cassiope pectinata</i>      | JN044180 |
| Eudicotyledons | Ericaceae     | <i>Cassiope</i>   | <i>Cassiope selaginoides</i>   | JN044181 |
| Eudicotyledons | Ericaceae     | <i>Cassiope</i>   | <i>Cassiope selaginoides</i>   | JN044182 |
| Eudicotyledons | Ericaceae     | <i>Cassiope</i>   | <i>Cassiope selaginoides</i>   | JN044183 |
| Eudicotyledons | Ericaceae     | <i>Cassiope</i>   | <i>Cassiope selaginoides</i>   | JN044184 |
| Eudicotyledons | Ericaceae     | <i>Cassiope</i>   | <i>Cassiope selaginoides</i>   | JN044185 |
| Eudicotyledons | Ericaceae     | <i>Cassiope</i>   | <i>Cassiope selaginoides</i>   | JN044186 |
| Eudicotyledons | Euphorbiaceae | <i>Croton</i>     | <i>Croton orinocensis</i>      | HM044833 |
| Eudicotyledons | Euphorbiaceae | <i>Croton</i>     | <i>Croton orinocensis</i>      | HM044834 |
| Eudicotyledons | Campanulaceae | <i>Cyananthus</i> | <i>Cyananthus macrocalyx</i>   | JN044357 |
| Eudicotyledons | Campanulaceae | <i>Cyananthus</i> | <i>Cyananthus macrocalyx</i>   | JN044358 |
| Eudicotyledons | Campanulaceae | <i>Cyananthus</i> | <i>Cyananthus macrocalyx</i>   | JN044359 |
| Eudicotyledons | Campanulaceae | <i>Cyananthus</i> | <i>Cyananthus macrocalyx</i>   | JN044360 |
| Eudicotyledons | Ericaceae     | <i>Gaultheria</i> | <i>Gaultheria brevistipes</i>  | JN044552 |
| Eudicotyledons | Ericaceae     | <i>Gaultheria</i> | <i>Gaultheria brevistipes</i>  | JN044553 |
| Eudicotyledons | Ericaceae     | <i>Gaultheria</i> | <i>Gaultheria brevistipes</i>  | JN044554 |
| Eudicotyledons | Ericaceae     | <i>Gaultheria</i> | <i>Gaultheria brevistipes</i>  | JN044555 |
| Eudicotyledons | Ericaceae     | <i>Gaultheria</i> | <i>Gaultheria cardiosepala</i> | JN044556 |
| Eudicotyledons | Ericaceae     | <i>Gaultheria</i> | <i>Gaultheria cardiosepala</i> | JN044557 |
| Eudicotyledons | Ericaceae     | <i>Gaultheria</i> | <i>Gaultheria cardiosepala</i> | JN044558 |
| Eudicotyledons | Ericaceae     | <i>Gaultheria</i> | <i>Gaultheria cardiosepala</i> | JN044559 |
| Eudicotyledons | Ericaceae     | <i>Gaultheria</i> | <i>Gaultheria cardiosepala</i> | JN044560 |
| Eudicotyledons | Ericaceae     | <i>Gaultheria</i> | <i>Gaultheria codonantha</i>   | JN044561 |
| Eudicotyledons | Ericaceae     | <i>Gaultheria</i> | <i>Gaultheria codonantha</i>   | JN044562 |
| Eudicotyledons | Ericaceae     | <i>Gaultheria</i> | <i>Gaultheria codonantha</i>   | JN044563 |
| Eudicotyledons | Ericaceae     | <i>Gaultheria</i> | <i>Gaultheria codonantha</i>   | JN044564 |
| Eudicotyledons | Ericaceae     | <i>Gaultheria</i> | <i>Gaultheria cuneata</i>      | JN044565 |



|                |            |                     |                                  |          |
|----------------|------------|---------------------|----------------------------------|----------|
| Eudicotyledons | Ericaceae  | <i>Gaultheria</i>   | <i>Gaultheria straminea</i>      | JN044699 |
| Eudicotyledons | Ericaceae  | <i>Gaultheria</i>   | <i>Gaultheria straminea</i>      | JN044700 |
| Eudicotyledons | Ericaceae  | <i>Gaultheria</i>   | <i>Gaultheria straminea</i>      | JN044701 |
| Eudicotyledons | Ericaceae  | <i>Gaultheria</i>   | <i>Gaultheria trichophylla</i>   | JN044710 |
| Eudicotyledons | Ericaceae  | <i>Gaultheria</i>   | <i>Gaultheria trichophylla</i>   | JN044711 |
| Eudicotyledons | Ericaceae  | <i>Gaultheria</i>   | <i>Gaultheria trichophylla</i>   | JN044712 |
| Eudicotyledons | Ericaceae  | <i>Gaultheria</i>   | <i>Gaultheria trichophylla</i>   | JN044713 |
| Eudicotyledons | Ericaceae  | <i>Gaultheria</i>   | <i>Gaultheria trichophylla</i>   | JN044714 |
| Eudicotyledons | Ericaceae  | <i>Gaultheria</i>   | <i>Gaultheria trichophylla</i>   | JN044715 |
| Eudicotyledons | Ericaceae  | <i>Gaultheria</i>   | <i>Gaultheria trichophylla</i>   | JN044716 |
| Eudicotyledons | Ericaceae  | <i>Gaultheria</i>   | <i>Gaultheria trichophylla</i>   | JN044717 |
| Eudicotyledons | Ericaceae  | <i>Gaultheria</i>   | <i>Gaultheria trigonoclada</i>   | JN044718 |
| Eudicotyledons | Ericaceae  | <i>Gaultheria</i>   | <i>Gaultheria trigonoclada</i>   | JN044719 |
| Eudicotyledons | Ericaceae  | <i>Gaultheria</i>   | <i>Gaultheria trigonoclada</i>   | JN044720 |
| Eudicotyledons | Ericaceae  | <i>Gaultheria</i>   | <i>Gaultheria trigonoclada</i>   | JN044721 |
| Eudicotyledons | Cactaceae  | <i>Pfeiffera</i>    | <i>Pfeiffera asuntapatensis</i>  | FR716781 |
| Eudicotyledons | Cactaceae  | <i>Pfeiffera</i>    | <i>Pfeiffera asuntapatensis</i>  | FR716782 |
| Eudicotyledons | Cactaceae  | <i>Pfeiffera</i>    | <i>Pfeiffera boliviana</i>       | FR716783 |
| Eudicotyledons | Cactaceae  | <i>Pfeiffera</i>    | <i>Pfeiffera boliviana</i>       | FR716784 |
| Eudicotyledons | Cactaceae  | <i>Pfeiffera</i>    | <i>Pfeiffera paranganiensis</i>  | FR716787 |
| Eudicotyledons | Cactaceae  | <i>Pfeiffera</i>    | <i>Pfeiffera paranganiensis</i>  | FR716788 |
| Eudicotyledons | Cactaceae  | <i>Pfeiffera</i>    | <i>Pfeiffera paranganiensis</i>  | FR716789 |
| Eudicotyledons | Fabaceae   | <i>Calliandra</i>   | <i>Calliandra haematocephala</i> | GU396788 |
| Eudicotyledons | Fabaceae   | <i>Calliandra</i>   | <i>Calliandra haematocephala</i> | GU396789 |
| Eudicotyledons | Asteraceae | <i>Tragopogon</i>   | <i>Tragopogon x mirabilis</i>    | HQ456292 |
| Eudicotyledons | Asteraceae | <i>Tragopogon</i>   | <i>Tragopogon x mirabilis</i>    | HQ456293 |
| Eudicotyledons | Oleaceae   | <i>Ligustrum</i>    | <i>Ligustrum delavayanum</i>     | JF830294 |
| Eudicotyledons | Oleaceae   | <i>Ligustrum</i>    | <i>Ligustrum delavayanum</i>     | JF830295 |
| Eudicotyledons | Oleaceae   | <i>Ligustrum</i>    | <i>Ligustrum delavayanum</i>     | JF830296 |
| Eudicotyledons | Oleaceae   | <i>Ligustrum</i>    | <i>Ligustrum delavayanum</i>     | JF830297 |
| Eudicotyledons | Vitaceae   | <i>Ampelocissus</i> | <i>Ampelocissus africana</i>     | JQ182504 |
| Eudicotyledons | Vitaceae   | <i>Ampelocissus</i> | <i>Ampelocissus africana</i>     | JQ182507 |
| Eudicotyledons | Vitaceae   | <i>Cayratia</i>     | <i>Cayratia geniculata</i>       | JQ182532 |
| Eudicotyledons | Vitaceae   | <i>Cayratia</i>     | <i>Cayratia geniculata</i>       | HM585662 |
| Eudicotyledons | Vitaceae   | <i>Cissus</i>       | <i>Cissus subtetragona</i>       | HM585673 |
| Eudicotyledons | Vitaceae   | <i>Cissus</i>       | <i>Cissus subtetragona</i>       | JF437102 |
| Eudicotyledons | Vitaceae   | <i>Tetrastigma</i>  | <i>Tetrastigma annamense</i>     | HM585682 |
| Eudicotyledons | Vitaceae   | <i>Tetrastigma</i>  | <i>Tetrastigma annamense</i>     | HM585683 |
| Eudicotyledons | Vitaceae   | <i>Tetrastigma</i>  | <i>Tetrastigma apiculatum</i>    | HM585684 |
| Eudicotyledons | Vitaceae   | <i>Tetrastigma</i>  | <i>Tetrastigma apiculatum</i>    | HM585685 |
| Eudicotyledons | Vitaceae   | <i>Tetrastigma</i>  | <i>Tetrastigma apiculatum</i>    | HM585686 |
| Eudicotyledons | Vitaceae   | <i>Tetrastigma</i>  | <i>Tetrastigma bioritsense</i>   | HM585688 |
| Eudicotyledons | Vitaceae   | <i>Tetrastigma</i>  | <i>Tetrastigma bioritsense</i>   | JF437140 |
| Eudicotyledons | Vitaceae   | <i>Tetrastigma</i>  | <i>Tetrastigma ceratopetalum</i> | HM585693 |
| Eudicotyledons | Vitaceae   | <i>Tetrastigma</i>  | <i>Tetrastigma ceratopetalum</i> | HM585694 |
| Eudicotyledons | Vitaceae   | <i>Tetrastigma</i>  | <i>Tetrastigma ceratopetalum</i> | HM585695 |
| Eudicotyledons | Vitaceae   | <i>Tetrastigma</i>  | <i>Tetrastigma ceratopetalum</i> | HM585696 |
| Eudicotyledons | Vitaceae   | <i>Tetrastigma</i>  | <i>Tetrastigma ceratopetalum</i> | HM585697 |
| Eudicotyledons | Vitaceae   | <i>Tetrastigma</i>  | <i>Tetrastigma ceratopetalum</i> | HM585698 |
| Eudicotyledons | Vitaceae   | <i>Tetrastigma</i>  | <i>Tetrastigma cruciatum</i>     | HM585700 |
| Eudicotyledons | Vitaceae   | <i>Tetrastigma</i>  | <i>Tetrastigma cruciatum</i>     | HM585701 |
| Eudicotyledons | Vitaceae   | <i>Tetrastigma</i>  | <i>Tetrastigma cruciatum</i>     | HM585702 |
| Eudicotyledons | Vitaceae   | <i>Tetrastigma</i>  | <i>Tetrastigma delavayi</i>      | HM585704 |

|                |           |                    |                                    |          |
|----------------|-----------|--------------------|------------------------------------|----------|
| Eudicotyledons | Vitaceae  | <i>Tetrastigma</i> | <i>Tetrastigma delavayi</i>        | HM585705 |
| Eudicotyledons | Vitaceae  | <i>Tetrastigma</i> | <i>Tetrastigma delavayi</i>        | HM585706 |
| Eudicotyledons | Vitaceae  | <i>Tetrastigma</i> | <i>Tetrastigma erubescens</i>      | HM585710 |
| Eudicotyledons | Vitaceae  | <i>Tetrastigma</i> | <i>Tetrastigma erubescens</i>      | HM585711 |
| Eudicotyledons | Vitaceae  | <i>Tetrastigma</i> | <i>Tetrastigma erubescens</i>      | HM585712 |
| Eudicotyledons | Vitaceae  | <i>Tetrastigma</i> | <i>Tetrastigma erubescens</i>      | JF437141 |
| Eudicotyledons | Vitaceae  | <i>Tetrastigma</i> | <i>Tetrastigma funingense</i>      | HM585714 |
| Eudicotyledons | Vitaceae  | <i>Tetrastigma</i> | <i>Tetrastigma funingense</i>      | HM585715 |
| Eudicotyledons | Vitaceae  | <i>Tetrastigma</i> | <i>Tetrastigma garrettii</i>       | HM585716 |
| Eudicotyledons | Vitaceae  | <i>Tetrastigma</i> | <i>Tetrastigma garrettii</i>       | HM585717 |
| Eudicotyledons | Vitaceae  | <i>Tetrastigma</i> | <i>Tetrastigma garrettii</i>       | HM585718 |
| Eudicotyledons | Vitaceae  | <i>Tetrastigma</i> | <i>Tetrastigma garrettii</i>       | JF437142 |
| Eudicotyledons | Vitaceae  | <i>Tetrastigma</i> | <i>Tetrastigma gaudichaudianum</i> | HM585720 |
| Eudicotyledons | Vitaceae  | <i>Tetrastigma</i> | <i>Tetrastigma gaudichaudianum</i> | HM585721 |
| Eudicotyledons | Vitaceae  | <i>Tetrastigma</i> | <i>Tetrastigma hemsleyanum</i>     | HM585722 |
| Eudicotyledons | Vitaceae  | <i>Tetrastigma</i> | <i>Tetrastigma hemsleyanum</i>     | HM585723 |
| Eudicotyledons | Vitaceae  | <i>Tetrastigma</i> | <i>Tetrastigma hemsleyanum</i>     | JF437143 |
| Eudicotyledons | Vitaceae  | <i>Tetrastigma</i> | <i>Tetrastigma jinghongense</i>    | HM585728 |
| Eudicotyledons | Vitaceae  | <i>Tetrastigma</i> | <i>Tetrastigma jinghongense</i>    | JF437144 |
| Eudicotyledons | Vitaceae  | <i>Tetrastigma</i> | <i>Tetrastigma laevigatum</i>      | HM585729 |
| Eudicotyledons | Vitaceae  | <i>Tetrastigma</i> | <i>Tetrastigma laevigatum</i>      | HM585730 |
| Eudicotyledons | Vitaceae  | <i>Tetrastigma</i> | <i>Tetrastigma lanyuense</i>       | HM585731 |
| Eudicotyledons | Vitaceae  | <i>Tetrastigma</i> | <i>Tetrastigma lanyuense</i>       | JF437145 |
| Eudicotyledons | Vitaceae  | <i>Tetrastigma</i> | <i>Tetrastigma laxum</i>           | HM585738 |
| Eudicotyledons | Vitaceae  | <i>Tetrastigma</i> | <i>Tetrastigma laxum</i>           | HM585739 |
| Eudicotyledons | Vitaceae  | <i>Tetrastigma</i> | <i>Tetrastigma laxum</i>           | HM585740 |
| Eudicotyledons | Vitaceae  | <i>Tetrastigma</i> | <i>Tetrastigma lenticellatum</i>   | HM585741 |
| Eudicotyledons | Vitaceae  | <i>Tetrastigma</i> | <i>Tetrastigma lenticellatum</i>   | HM585742 |
| Eudicotyledons | Vitaceae  | <i>Tetrastigma</i> | <i>Tetrastigma napaulense</i>      | HM585744 |
| Eudicotyledons | Vitaceae  | <i>Tetrastigma</i> | <i>Tetrastigma napaulense</i>      | HM585745 |
| Eudicotyledons | Vitaceae  | <i>Tetrastigma</i> | <i>Tetrastigma pachyphyllum</i>    | HM585752 |
| Eudicotyledons | Vitaceae  | <i>Tetrastigma</i> | <i>Tetrastigma pachyphyllum</i>    | HM585753 |
| Eudicotyledons | Vitaceae  | <i>Tetrastigma</i> | <i>Tetrastigma pachyphyllum</i>    | JF437147 |
| Eudicotyledons | Vitaceae  | <i>Tetrastigma</i> | <i>Tetrastigma pedunculare</i>     | HM585755 |
| Eudicotyledons | Vitaceae  | <i>Tetrastigma</i> | <i>Tetrastigma pedunculare</i>     | HM585756 |
| Eudicotyledons | Vitaceae  | <i>Tetrastigma</i> | <i>Tetrastigma pedunculare</i>     | HM585757 |
| Eudicotyledons | Vitaceae  | <i>Tetrastigma</i> | <i>Tetrastigma planicaule</i>      | HM585759 |
| Eudicotyledons | Vitaceae  | <i>Tetrastigma</i> | <i>Tetrastigma planicaule</i>      | HQ656487 |
| Eudicotyledons | Vitaceae  | <i>Tetrastigma</i> | <i>Tetrastigma planicaule</i>      | JF437148 |
| Eudicotyledons | Vitaceae  | <i>Tetrastigma</i> | <i>Tetrastigma pyriforme</i>       | HM585760 |
| Eudicotyledons | Vitaceae  | <i>Tetrastigma</i> | <i>Tetrastigma pyriforme</i>       | HM585761 |
| Eudicotyledons | Vitaceae  | <i>Tetrastigma</i> | <i>Tetrastigma tuberculatum</i>    | HM585784 |
| Eudicotyledons | Vitaceae  | <i>Tetrastigma</i> | <i>Tetrastigma tuberculatum</i>    | HM585785 |
| Eudicotyledons | Ebenaceae | <i>Diospyros</i>   | <i>Diospyros morrisiana</i>        | HQ415533 |
| Eudicotyledons | Ebenaceae | <i>Diospyros</i>   | <i>Diospyros morrisiana</i>        | HQ427083 |
| Eudicotyledons | Oleaceae  | <i>Ligustrum</i>   | <i>Ligustrum confusum</i>          | JF830276 |
| Eudicotyledons | Oleaceae  | <i>Ligustrum</i>   | <i>Ligustrum confusum</i>          | JF830277 |
| Eudicotyledons | Oleaceae  | <i>Ligustrum</i>   | <i>Ligustrum confusum</i>          | JF830278 |
| Eudicotyledons | Oleaceae  | <i>Ligustrum</i>   | <i>Ligustrum expansum</i>          | JF830279 |
| Eudicotyledons | Oleaceae  | <i>Ligustrum</i>   | <i>Ligustrum expansum</i>          | JF830280 |
| Eudicotyledons | Oleaceae  | <i>Ligustrum</i>   | <i>Ligustrum expansum</i>          | JF830281 |
| Eudicotyledons | Oleaceae  | <i>Ligustrum</i>   | <i>Ligustrum gracile</i>           | JF830316 |
| Eudicotyledons | Oleaceae  | <i>Ligustrum</i>   | <i>Ligustrum gracile</i>           | JF830317 |

|                |             |                      |                                   |          |
|----------------|-------------|----------------------|-----------------------------------|----------|
| Eudicotyledons | Oleaceae    | <i>Ligustrum</i>     | <i>Ligustrum gracile</i>          | JF830318 |
| Eudicotyledons | Oleaceae    | <i>Ligustrum</i>     | <i>Ligustrum henryi</i>           | JF830261 |
| Eudicotyledons | Oleaceae    | <i>Ligustrum</i>     | <i>Ligustrum henryi</i>           | JF830262 |
| Eudicotyledons | Oleaceae    | <i>Ligustrum</i>     | <i>Ligustrum henryi</i>           | JF830263 |
| Eudicotyledons | Oleaceae    | <i>Ligustrum</i>     | <i>Ligustrum henryi</i>           | JF830264 |
| Eudicotyledons | Oleaceae    | <i>Ligustrum</i>     | <i>Ligustrum henryi</i>           | JF830265 |
| Eudicotyledons | Oleaceae    | <i>Ligustrum</i>     | <i>Ligustrum henryi</i>           | JF830266 |
| Eudicotyledons | Oleaceae    | <i>Ligustrum</i>     | <i>Ligustrum henryi</i>           | JN045220 |
| Eudicotyledons | Oleaceae    | <i>Ligustrum</i>     | <i>Ligustrum henryi</i>           | JN045221 |
| Eudicotyledons | Oleaceae    | <i>Ligustrum</i>     | <i>Ligustrum henryi</i>           | JN045222 |
| Eudicotyledons | Oleaceae    | <i>Ligustrum</i>     | <i>Ligustrum henryi</i>           | JN045223 |
| Eudicotyledons | Oleaceae    | <i>Ligustrum</i>     | <i>Ligustrum henryi</i>           | JN045224 |
| Eudicotyledons | Oleaceae    | <i>Ligustrum</i>     | <i>Ligustrum robustum</i>         | JN045236 |
| Eudicotyledons | Oleaceae    | <i>Ligustrum</i>     | <i>Ligustrum robustum</i>         | JN045237 |
| Eudicotyledons | Oleaceae    | <i>Ligustrum</i>     | <i>Ligustrum robustum</i>         | JN045238 |
| Eudicotyledons | Oleaceae    | <i>Ligustrum</i>     | <i>Ligustrum robustum</i>         | JN045239 |
| Eudicotyledons | Oleaceae    | <i>Ligustrum</i>     | <i>Ligustrum robustum</i>         | JN045240 |
| Eudicotyledons | Oleaceae    | <i>Ligustrum</i>     | <i>Ligustrum strongylophyllum</i> | JF830267 |
| Eudicotyledons | Oleaceae    | <i>Ligustrum</i>     | <i>Ligustrum strongylophyllum</i> | JF830268 |
| Eudicotyledons | Oleaceae    | <i>Ligustrum</i>     | <i>Ligustrum strongylophyllum</i> | JF830269 |
| Eudicotyledons | Oleaceae    | <i>Ligustrum</i>     | <i>Ligustrum strongylophyllum</i> | JN045244 |
| Eudicotyledons | Oleaceae    | <i>Ligustrum</i>     | <i>Ligustrum strongylophyllum</i> | JN045245 |
| Eudicotyledons | Oleaceae    | <i>Ligustrum</i>     | <i>Ligustrum xingrenense</i>      | JF830291 |
| Eudicotyledons | Oleaceae    | <i>Ligustrum</i>     | <i>Ligustrum xingrenense</i>      | JF830292 |
| Eudicotyledons | Oleaceae    | <i>Ligustrum</i>     | <i>Ligustrum xingrenense</i>      | JF830293 |
| Eudicotyledons | Fabaceae    | <i>Anthyllis</i>     | <i>Anthyllis hystris</i>          | HM468244 |
| Eudicotyledons | Fabaceae    | <i>Anthyllis</i>     | <i>Anthyllis hystris</i>          | HQ646219 |
| Eudicotyledons | Oleaceae    | <i>Ligustrum</i>     | <i>Ligustrum pricei</i>           | JN045230 |
| Eudicotyledons | Oleaceae    | <i>Ligustrum</i>     | <i>Ligustrum pricei</i>           | JN045231 |
| Eudicotyledons | Oleaceae    | <i>Ligustrum</i>     | <i>Ligustrum pricei</i>           | JN045232 |
| Eudicotyledons | Oleaceae    | <i>Ligustrum</i>     | <i>Ligustrum pricei</i>           | JN045233 |
| Eudicotyledons | Primulaceae | <i>Omphalogramma</i> | <i>Omphalogramma elegans</i>      | JN045604 |
| Eudicotyledons | Primulaceae | <i>Omphalogramma</i> | <i>Omphalogramma elegans</i>      | JN045605 |
| Eudicotyledons | Primulaceae | <i>Omphalogramma</i> | <i>Omphalogramma elegans</i>      | JN045606 |
| Eudicotyledons | Primulaceae | <i>Omphalogramma</i> | <i>Omphalogramma elegans</i>      | JN045607 |
| Eudicotyledons | Primulaceae | <i>Omphalogramma</i> | <i>Omphalogramma elegans</i>      | JN045608 |
| Eudicotyledons | Primulaceae | <i>Omphalogramma</i> | <i>Omphalogramma forrestii</i>    | JN045609 |
| Eudicotyledons | Primulaceae | <i>Omphalogramma</i> | <i>Omphalogramma forrestii</i>    | JN045610 |
| Eudicotyledons | Primulaceae | <i>Omphalogramma</i> | <i>Omphalogramma forrestii</i>    | JN045611 |
| Eudicotyledons | Primulaceae | <i>Omphalogramma</i> | <i>Omphalogramma forrestii</i>    | JN045612 |
| Eudicotyledons | Primulaceae | <i>Omphalogramma</i> | <i>Omphalogramma forrestii</i>    | JN045613 |
| Eudicotyledons | Primulaceae | <i>Omphalogramma</i> | <i>Omphalogramma minus</i>        | JN045614 |
| Eudicotyledons | Primulaceae | <i>Omphalogramma</i> | <i>Omphalogramma minus</i>        | JN045615 |
| Eudicotyledons | Primulaceae | <i>Omphalogramma</i> | <i>Omphalogramma minus</i>        | JN045616 |
| Eudicotyledons | Primulaceae | <i>Omphalogramma</i> | <i>Omphalogramma minus</i>        | JN045617 |
| Eudicotyledons | Primulaceae | <i>Omphalogramma</i> | <i>Omphalogramma minus</i>        | JN045618 |
| Eudicotyledons | Primulaceae | <i>Omphalogramma</i> | <i>Omphalogramma tibeticum</i>    | JN045624 |
| Eudicotyledons | Primulaceae | <i>Omphalogramma</i> | <i>Omphalogramma tibeticum</i>    | JN045625 |
| Eudicotyledons | Primulaceae | <i>Omphalogramma</i> | <i>Omphalogramma tibeticum</i>    | JN045626 |
| Eudicotyledons | Primulaceae | <i>Omphalogramma</i> | <i>Omphalogramma tibeticum</i>    | JN045627 |
| Eudicotyledons | Rosaceae    | <i>Pyracantha</i>    | <i>Pyracantha crenulata</i>       | JN046706 |
| Eudicotyledons | Rosaceae    | <i>Pyracantha</i>    | <i>Pyracantha crenulata</i>       | JN046707 |
| Eudicotyledons | Rosaceae    | <i>Pyracantha</i>    | <i>Pyracantha crenulata</i>       | JN046708 |

|                |               |                    |                                      |          |
|----------------|---------------|--------------------|--------------------------------------|----------|
| Eudicotyledons | Fagaceae      | <i>Castanopsis</i> | <i>Castanopsis chunii</i>            | JN044198 |
| Eudicotyledons | Fagaceae      | <i>Castanopsis</i> | <i>Castanopsis chunii</i>            | JN044199 |
| Eudicotyledons | Fagaceae      | <i>Castanopsis</i> | <i>Castanopsis chunii</i>            | JN044200 |
| Eudicotyledons | Fagaceae      | <i>Castanopsis</i> | <i>Castanopsis lamontii</i>          | JN044214 |
| Eudicotyledons | Fagaceae      | <i>Castanopsis</i> | <i>Castanopsis lamontii</i>          | JN044215 |
| Eudicotyledons | Fagaceae      | <i>Castanopsis</i> | <i>Castanopsis lamontii</i>          | JN044216 |
| Eudicotyledons | Fagaceae      | <i>Castanopsis</i> | <i>Castanopsis lamontii</i>          | JN044217 |
| Eudicotyledons | Fagaceae      | <i>Castanopsis</i> | <i>Castanopsis lamontii</i>          | JN044218 |
| Eudicotyledons | Fagaceae      | <i>Castanopsis</i> | <i>Castanopsis megaphylla</i>        | JN044219 |
| Eudicotyledons | Fagaceae      | <i>Castanopsis</i> | <i>Castanopsis megaphylla</i>        | JN044220 |
| Eudicotyledons | Fagaceae      | <i>Castanopsis</i> | <i>Castanopsis orthacantha</i>       | JN044221 |
| Eudicotyledons | Fagaceae      | <i>Castanopsis</i> | <i>Castanopsis orthacantha</i>       | JN044222 |
| Eudicotyledons | Fagaceae      | <i>Castanopsis</i> | <i>Castanopsis orthacantha</i>       | JN044223 |
| Eudicotyledons | Fagaceae      | <i>Castanopsis</i> | <i>Castanopsis platyacantha</i>      | JN044224 |
| Eudicotyledons | Fagaceae      | <i>Castanopsis</i> | <i>Castanopsis platyacantha</i>      | JN044225 |
| Eudicotyledons | Fagaceae      | <i>Castanopsis</i> | <i>Castanopsis platyacantha</i>      | JN044226 |
| Eudicotyledons | Fagaceae      | <i>Castanopsis</i> | <i>Castanopsis platyacantha</i>      | JN044227 |
| Eudicotyledons | Fagaceae      | <i>Castanopsis</i> | <i>Castanopsis remotidenticulata</i> | JN044228 |
| Eudicotyledons | Fagaceae      | <i>Castanopsis</i> | <i>Castanopsis remotidenticulata</i> | JN044229 |
| Eudicotyledons | Fagaceae      | <i>Castanopsis</i> | <i>Castanopsis remotidenticulata</i> | JN044230 |
| Eudicotyledons | Campanulaceae | <i>Cyananthus</i>  | <i>Cyananthus dolichosceles</i>      | JN044331 |
| Eudicotyledons | Campanulaceae | <i>Cyananthus</i>  | <i>Cyananthus dolichosceles</i>      | JN044332 |
| Eudicotyledons | Campanulaceae | <i>Cyananthus</i>  | <i>Cyananthus dolichosceles</i>      | JN044333 |
| Eudicotyledons | Campanulaceae | <i>Cyananthus</i>  | <i>Cyananthus dolichosceles</i>      | JN044334 |
| Eudicotyledons | Campanulaceae | <i>Cyananthus</i>  | <i>Cyananthus formosus</i>           | JN044335 |
| Eudicotyledons | Campanulaceae | <i>Cyananthus</i>  | <i>Cyananthus formosus</i>           | JN044336 |
| Eudicotyledons | Campanulaceae | <i>Cyananthus</i>  | <i>Cyananthus hookeri</i>            | JN044337 |
| Eudicotyledons | Campanulaceae | <i>Cyananthus</i>  | <i>Cyananthus hookeri</i>            | JN044338 |
| Eudicotyledons | Campanulaceae | <i>Cyananthus</i>  | <i>Cyananthus hookeri</i>            | JN044339 |
| Eudicotyledons | Campanulaceae | <i>Cyananthus</i>  | <i>Cyananthus hookeri</i>            | JN044340 |
| Eudicotyledons | Campanulaceae | <i>Cyananthus</i>  | <i>Cyananthus incanus</i>            | JN044341 |
| Eudicotyledons | Campanulaceae | <i>Cyananthus</i>  | <i>Cyananthus incanus</i>            | JN044342 |
| Eudicotyledons | Campanulaceae | <i>Cyananthus</i>  | <i>Cyananthus incanus</i>            | JN044343 |
| Eudicotyledons | Campanulaceae | <i>Cyananthus</i>  | <i>Cyananthus incanus</i>            | JN044344 |
| Eudicotyledons | Campanulaceae | <i>Cyananthus</i>  | <i>Cyananthus incanus</i>            | JN044345 |
| Eudicotyledons | Campanulaceae | <i>Cyananthus</i>  | <i>Cyananthus inflatus</i>           | JN044346 |
| Eudicotyledons | Campanulaceae | <i>Cyananthus</i>  | <i>Cyananthus inflatus</i>           | JN044347 |
| Eudicotyledons | Campanulaceae | <i>Cyananthus</i>  | <i>Cyananthus inflatus</i>           | JN044348 |
| Eudicotyledons | Campanulaceae | <i>Cyananthus</i>  | <i>Cyananthus inflatus</i>           | JN044349 |
| Eudicotyledons | Campanulaceae | <i>Cyananthus</i>  | <i>Cyananthus inflatus</i>           | JN044350 |
| Eudicotyledons | Campanulaceae | <i>Cyananthus</i>  | <i>Cyananthus lichiangensis</i>      | JN044351 |
| Eudicotyledons | Campanulaceae | <i>Cyananthus</i>  | <i>Cyananthus lichiangensis</i>      | JN044352 |
| Eudicotyledons | Campanulaceae | <i>Cyananthus</i>  | <i>Cyananthus lichiangensis</i>      | JN044353 |
| Eudicotyledons | Campanulaceae | <i>Cyananthus</i>  | <i>Cyananthus lichiangensis</i>      | JN044354 |
| Eudicotyledons | Onagraceae    | <i>Epilobium</i>   | <i>Epilobium cylindricum</i>         | JN129838 |
| Eudicotyledons | Onagraceae    | <i>Epilobium</i>   | <i>Epilobium cylindricum</i>         | JN129839 |
| Eudicotyledons | Ericaceae     | <i>Gaultheria</i>  | <i>Gaultheria suborbicularis</i>     | JN044702 |
| Eudicotyledons | Ericaceae     | <i>Gaultheria</i>  | <i>Gaultheria suborbicularis</i>     | JN044703 |
| Eudicotyledons | Ericaceae     | <i>Gaultheria</i>  | <i>Gaultheria suborbicularis</i>     | JN044704 |
| Eudicotyledons | Ericaceae     | <i>Gaultheria</i>  | <i>Gaultheria suborbicularis</i>     | JN044705 |
| Eudicotyledons | Ericaceae     | <i>Gaultheria</i>  | <i>Gaultheria tetramera</i>          | JN044706 |
| Eudicotyledons | Ericaceae     | <i>Gaultheria</i>  | <i>Gaultheria tetramera</i>          | JN044707 |
| Eudicotyledons | Ericaceae     | <i>Gaultheria</i>  | <i>Gaultheria tetramera</i>          | JN044708 |

|                |               |                     |                                     |          |
|----------------|---------------|---------------------|-------------------------------------|----------|
| Eudicotyledons | Ericaceae     | <i>Gaultheria</i>   | <i>Gaultheria tetramera</i>         | JN044709 |
| Eudicotyledons | Vitaceae      | <i>Cayratia</i>     | <i>Cayratia debilis</i>             | HQ656482 |
| Eudicotyledons | Vitaceae      | <i>Cayratia</i>     | <i>Cayratia debilis</i>             | JF437075 |
| Eudicotyledons | Vitaceae      | <i>Cayratia</i>     | <i>Cayratia debilis</i>             | JF437076 |
| Eudicotyledons | Asteraceae    | <i>Mikania</i>      | <i>Mikania laevigata</i>            | JN052778 |
| Eudicotyledons | Asteraceae    | <i>Mikania</i>      | <i>Mikania laevigata</i>            | JN052779 |
| Eudicotyledons | Asteraceae    | <i>Mikania</i>      | <i>Mikania laevigata</i>            | JN052780 |
| Eudicotyledons | Asteraceae    | <i>Mikania</i>      | <i>Mikania laevigata</i>            | JN052781 |
| Eudicotyledons | Asteraceae    | <i>Mikania</i>      | <i>Mikania laevigata</i>            | JN052782 |
| Eudicotyledons | Asteraceae    | <i>Mikania</i>      | <i>Mikania laevigata</i>            | JN052783 |
| Eudicotyledons | Vitaceae      | <i>Ampelocissus</i> | <i>Ampelocissus erdvendbergiana</i> | JQ182527 |
| Eudicotyledons | Vitaceae      | <i>Ampelocissus</i> | <i>Ampelocissus erdvendbergiana</i> | JF437059 |
| Eudicotyledons | Vitaceae      | <i>Ampelopsis</i>   | <i>Ampelopsis denudata</i>          | JQ182534 |
| Eudicotyledons | Vitaceae      | <i>Ampelopsis</i>   | <i>Ampelopsis denudata</i>          | JF437066 |
| Eudicotyledons | Vitaceae      | <i>Cissus</i>       | <i>Cissus assamica</i>              | JF437089 |
| Eudicotyledons | Vitaceae      | <i>Cissus</i>       | <i>Cissus assamica</i>              | JF437090 |
| Eudicotyledons | Asteraceae    | <i>Mikania</i>      | <i>Mikania glomerata</i>            | JN052774 |
| Eudicotyledons | Asteraceae    | <i>Mikania</i>      | <i>Mikania glomerata</i>            | JN052775 |
| Eudicotyledons | Asteraceae    | <i>Mikania</i>      | <i>Mikania glomerata</i>            | JN052776 |
| Eudicotyledons | Asteraceae    | <i>Mikania</i>      | <i>Mikania glomerata</i>            | JN052777 |
| Eudicotyledons | Asteraceae    | <i>Achillea</i>     | <i>Achillea inundata</i>            | HQ451042 |
| Eudicotyledons | Asteraceae    | <i>Achillea</i>     | <i>Achillea inundata</i>            | HQ451043 |
| Eudicotyledons | Rutaceae      | <i>Citrus</i>       | <i>Citrus limon</i>                 | GQ435450 |
| Eudicotyledons | Rutaceae      | <i>Citrus</i>       | <i>Citrus limon</i>                 | JN315362 |
| Eudicotyledons | Rutaceae      | <i>Citrus</i>       | <i>Citrus limon</i>                 | JN315363 |
| Eudicotyledons | Ranunculaceae | <i>Ranunculus</i>   | <i>Ranunculus acris</i>             | FJ395535 |
| Eudicotyledons | Ranunculaceae | <i>Ranunculus</i>   | <i>Ranunculus acris</i>             | HQ596809 |
| Eudicotyledons | Moraceae      | <i>Ficus</i>        | <i>Ficus carica</i>                 | GU935094 |
| Eudicotyledons | Moraceae      | <i>Ficus</i>        | <i>Ficus carica</i>                 | GU935095 |
| Eudicotyledons | Betulaceae    | <i>Betula</i>       | <i>Betula pendula</i>               | GQ248254 |
| Eudicotyledons | Betulaceae    | <i>Betula</i>       | <i>Betula pendula</i>               | JN247424 |
| Eudicotyledons | Betulaceae    | <i>Betula</i>       | <i>Betula pendula</i>               | FJ011881 |
| Eudicotyledons | Betulaceae    | <i>Betula</i>       | <i>Betula papyrifera</i>            | FJ011880 |
| Eudicotyledons | Betulaceae    | <i>Betula</i>       | <i>Betula papyrifera</i>            | EU750443 |
| Eudicotyledons | Betulaceae    | <i>Betula</i>       | <i>Betula papyrifera</i>            | EU750444 |
| Eudicotyledons | Betulaceae    | <i>Betula</i>       | <i>Betula papyrifera</i>            | EU750445 |
| Eudicotyledons | Fagaceae      | <i>Quercus</i>      | <i>Quercus rubra</i>                | HQ596807 |
| Eudicotyledons | Fagaceae      | <i>Quercus</i>      | <i>Quercus rubra</i>                | EU750513 |
| Eudicotyledons | Fagaceae      | <i>Quercus</i>      | <i>Quercus rubra</i>                | EU750514 |
| Eudicotyledons | Fagaceae      | <i>Quercus</i>      | <i>Quercus rubra</i>                | EU750515 |
| Eudicotyledons | Fagaceae      | <i>Quercus</i>      | <i>Quercus alba</i>                 | EU750506 |
| Eudicotyledons | Fagaceae      | <i>Quercus</i>      | <i>Quercus alba</i>                 | EU750507 |
| Eudicotyledons | Fagaceae      | <i>Quercus</i>      | <i>Quercus alba</i>                 | EU750508 |
| Eudicotyledons | Fagaceae      | <i>Quercus</i>      | <i>Quercus alba</i>                 | EU750509 |
| Eudicotyledons | Betulaceae    | <i>Alnus</i>        | <i>Alnus incana</i>                 | FJ011870 |
| Eudicotyledons | Betulaceae    | <i>Alnus</i>        | <i>Alnus incana</i>                 | FJ844532 |
| Eudicotyledons | Betulaceae    | <i>Alnus</i>        | <i>Alnus incana</i>                 | FJ844533 |
| Eudicotyledons | Betulaceae    | <i>Alnus</i>        | <i>Alnus incana</i>                 | FJ844534 |
| Eudicotyledons | Betulaceae    | <i>Alnus</i>        | <i>Alnus glutinosa</i>              | FJ011868 |
| Eudicotyledons | Betulaceae    | <i>Alnus</i>        | <i>Alnus glutinosa</i>              | FJ844535 |
| Eudicotyledons | Betulaceae    | <i>Alnus</i>        | <i>Alnus glutinosa</i>              | FJ844536 |
| Eudicotyledons | Betulaceae    | <i>Alnus</i>        | <i>Alnus glutinosa</i>              | FJ844537 |
| Eudicotyledons | Betulaceae    | <i>Alnus</i>        | <i>Alnus glutinosa</i>              | FJ844538 |



|                |               |                   |                                |          |
|----------------|---------------|-------------------|--------------------------------|----------|
| Eudicotyledons | Betulaceae    | <i>Alnus</i>      | <i>Alnus glutinosa</i>         | FJ844539 |
| Eudicotyledons | Onagraceae    | <i>Chamerion</i>  | <i>Chamerion angustifolium</i> | JN044476 |
| Eudicotyledons | Onagraceae    | <i>Chamerion</i>  | <i>Chamerion angustifolium</i> | JN044477 |
| Eudicotyledons | Onagraceae    | <i>Chamerion</i>  | <i>Chamerion angustifolium</i> | JN129841 |
| Eudicotyledons | Onagraceae    | <i>Chamerion</i>  | <i>Chamerion angustifolium</i> | JN129842 |
| Eudicotyledons | Onagraceae    | <i>Chamerion</i>  | <i>Chamerion angustifolium</i> | JN129843 |
| Eudicotyledons | Fabaceae      | <i>Schotia</i>    | <i>Schotia brachypetala</i>    | GQ405092 |
| Eudicotyledons | Fabaceae      | <i>Schotia</i>    | <i>Schotia brachypetala</i>    | GQ405098 |
| Eudicotyledons | Fabaceae      | <i>Schotia</i>    | <i>Schotia brachypetala</i>    | GQ405109 |
| Eudicotyledons | Fabaceae      | <i>Schotia</i>    | <i>Schotia brachypetala</i>    | GQ405121 |
| Eudicotyledons | Fabaceae      | <i>Schotia</i>    | <i>Schotia brachypetala</i>    | GQ405131 |
| Eudicotyledons | Fabaceae      | <i>Schotia</i>    | <i>Schotia brachypetala</i>    | GQ405132 |
| Eudicotyledons | Fabaceae      | <i>Astragalus</i> | <i>Astragalus adsurgens</i>    | GU396749 |
| Eudicotyledons | Fabaceae      | <i>Astragalus</i> | <i>Astragalus adsurgens</i>    | GU396750 |
| Eudicotyledons | Fabaceae      | <i>Astragalus</i> | <i>Astragalus adsurgens</i>    | GU396751 |
| Eudicotyledons | Betulaceae    | <i>Betula</i>     | <i>Betula alleghaniensis</i>   | EU750441 |
| Eudicotyledons | Betulaceae    | <i>Betula</i>     | <i>Betula alleghaniensis</i>   | EU750442 |
| Eudicotyledons | Hydrangeaceae | <i>Hydrangea</i>  | <i>Hydrangea macrophylla</i>   | GQ248319 |
| Eudicotyledons | Hydrangeaceae | <i>Hydrangea</i>  | <i>Hydrangea macrophylla</i>   | EF590702 |
| Eudicotyledons | Hydrangeaceae | <i>Hydrangea</i>  | <i>Hydrangea macrophylla</i>   | FN675801 |
| Eudicotyledons | Hydrangeaceae | <i>Hydrangea</i>  | <i>Hydrangea macrophylla</i>   | HM216983 |
| Eudicotyledons | Hydrangeaceae | <i>Hydrangea</i>  | <i>Hydrangea macrophylla</i>   | JF321258 |
| Eudicotyledons | Lamiaceae     | <i>Glechoma</i>   | <i>Glechoma hederacea</i>      | DQ667355 |
| Eudicotyledons | Lamiaceae     | <i>Glechoma</i>   | <i>Glechoma hederacea</i>      | FJ395524 |
| Eudicotyledons | Lamiaceae     | <i>Glechoma</i>   | <i>Glechoma hederacea</i>      | HQ596719 |
| Eudicotyledons | Lamiaceae     | <i>Glechoma</i>   | <i>Glechoma hederacea</i>      | DQ006196 |
| Eudicotyledons | Lamiaceae     | <i>Salvia</i>     | <i>Salvia divinorum</i>        | DQ667359 |
| Eudicotyledons | Lamiaceae     | <i>Salvia</i>     | <i>Salvia divinorum</i>        | HQ418913 |
| Eudicotyledons | Loganiaceae   | <i>Strychnos</i>  | <i>Strychnos nux-vomica</i>    | GQ435195 |
| Eudicotyledons | Loganiaceae   | <i>Strychnos</i>  | <i>Strychnos nux-vomica</i>    | GQ435196 |
| Eudicotyledons | Loganiaceae   | <i>Strychnos</i>  | <i>Strychnos nux-vomica</i>    | GQ435197 |
| Eudicotyledons | Loganiaceae   | <i>Strychnos</i>  | <i>Strychnos nux-vomica</i>    | GQ435198 |
| Eudicotyledons | Nothofagaceae | <i>Nothofagus</i> | <i>Nothofagus antarctica</i>   | GQ863325 |
| Eudicotyledons | Nothofagaceae | <i>Nothofagus</i> | <i>Nothofagus antarctica</i>   | GQ863328 |
| Eudicotyledons | Nothofagaceae | <i>Nothofagus</i> | <i>Nothofagus antarctica</i>   | GQ863336 |
| Eudicotyledons | Nothofagaceae | <i>Nothofagus</i> | <i>Nothofagus antarctica</i>   | GQ863339 |
| Eudicotyledons | Nothofagaceae | <i>Nothofagus</i> | <i>Nothofagus antarctica</i>   | GQ863341 |
| Eudicotyledons | Nothofagaceae | <i>Nothofagus</i> | <i>Nothofagus antarctica</i>   | GQ863342 |
| Eudicotyledons | Nothofagaceae | <i>Nothofagus</i> | <i>Nothofagus antarctica</i>   | GQ863346 |
| Eudicotyledons | Nothofagaceae | <i>Nothofagus</i> | <i>Nothofagus antarctica</i>   | GQ863348 |
| Eudicotyledons | Nothofagaceae | <i>Nothofagus</i> | <i>Nothofagus antarctica</i>   | GQ863349 |
| Eudicotyledons | Nothofagaceae | <i>Nothofagus</i> | <i>Nothofagus antarctica</i>   | GQ863351 |
| Eudicotyledons | Nothofagaceae | <i>Nothofagus</i> | <i>Nothofagus betuloides</i>   | GQ863332 |
| Eudicotyledons | Nothofagaceae | <i>Nothofagus</i> | <i>Nothofagus betuloides</i>   | GQ863337 |
| Eudicotyledons | Nothofagaceae | <i>Nothofagus</i> | <i>Nothofagus betuloides</i>   | GQ863343 |
| Eudicotyledons | Nothofagaceae | <i>Nothofagus</i> | <i>Nothofagus betuloides</i>   | GQ863350 |
| Eudicotyledons | Nothofagaceae | <i>Nothofagus</i> | <i>Nothofagus betuloides</i>   | GQ863352 |
| Eudicotyledons | Nothofagaceae | <i>Nothofagus</i> | <i>Nothofagus cunninghamii</i> | JN247426 |
| Eudicotyledons | Nothofagaceae | <i>Nothofagus</i> | <i>Nothofagus cunninghamii</i> | GQ863377 |
| Eudicotyledons | Nothofagaceae | <i>Nothofagus</i> | <i>Nothofagus dombeyi</i>      | GQ863326 |
| Eudicotyledons | Nothofagaceae | <i>Nothofagus</i> | <i>Nothofagus dombeyi</i>      | GQ863329 |
| Eudicotyledons | Nothofagaceae | <i>Nothofagus</i> | <i>Nothofagus dombeyi</i>      | GQ863333 |
| Eudicotyledons | Nothofagaceae | <i>Nothofagus</i> | <i>Nothofagus dombeyi</i>      | GQ863338 |

|                |                |                   |                           |          |
|----------------|----------------|-------------------|---------------------------|----------|
| Eudicotyledons | Nothofagaceae  | <i>Nothofagus</i> | <i>Nothofagus dombeyi</i> | GQ863340 |
| Eudicotyledons | Nothofagaceae  | <i>Nothofagus</i> | <i>Nothofagus dombeyi</i> | GQ863344 |
| Eudicotyledons | Nothofagaceae  | <i>Nothofagus</i> | <i>Nothofagus dombeyi</i> | GQ863347 |
| Eudicotyledons | Nothofagaceae  | <i>Nothofagus</i> | <i>Nothofagus nitida</i>  | GQ863334 |
| Eudicotyledons | Nothofagaceae  | <i>Nothofagus</i> | <i>Nothofagus nitida</i>  | GQ863345 |
| Eudicotyledons | Nothofagaceae  | <i>Nothofagus</i> | <i>Nothofagus obliqua</i> | GQ863331 |
| Eudicotyledons | Nothofagaceae  | <i>Nothofagus</i> | <i>Nothofagus obliqua</i> | GQ863335 |
| Eudicotyledons | Nothofagaceae  | <i>Nothofagus</i> | <i>Nothofagus pumilio</i> | GQ863388 |
| Eudicotyledons | Nothofagaceae  | <i>Nothofagus</i> | <i>Nothofagus pumilio</i> | GQ863389 |
| Eudicotyledons | Nothofagaceae  | <i>Nothofagus</i> | <i>Nothofagus pumilio</i> | GQ863390 |
| Eudicotyledons | Nothofagaceae  | <i>Nothofagus</i> | <i>Nothofagus pumilio</i> | GQ863391 |
| Eudicotyledons | Nothofagaceae  | <i>Nothofagus</i> | <i>Nothofagus pumilio</i> | GQ863392 |
| Eudicotyledons | Nothofagaceae  | <i>Nothofagus</i> | <i>Nothofagus pumilio</i> | GQ863393 |
| Eudicotyledons | Nothofagaceae  | <i>Nothofagus</i> | <i>Nothofagus pumilio</i> | GQ863394 |
| Eudicotyledons | Nothofagaceae  | <i>Nothofagus</i> | <i>Nothofagus pumilio</i> | GQ863395 |
| Eudicotyledons | Nothofagaceae  | <i>Nothofagus</i> | <i>Nothofagus pumilio</i> | GQ863396 |
| Eudicotyledons | Nothofagaceae  | <i>Nothofagus</i> | <i>Nothofagus pumilio</i> | GU152878 |
| Eudicotyledons | Nothofagaceae  | <i>Nothofagus</i> | <i>Nothofagus pumilio</i> | GU152879 |
| Eudicotyledons | Nothofagaceae  | <i>Nothofagus</i> | <i>Nothofagus pumilio</i> | GU152880 |
| Eudicotyledons | Nothofagaceae  | <i>Nothofagus</i> | <i>Nothofagus pumilio</i> | GU152881 |
| Eudicotyledons | Nothofagaceae  | <i>Nothofagus</i> | <i>Nothofagus pumilio</i> | GU152882 |
| Eudicotyledons | Nothofagaceae  | <i>Nothofagus</i> | <i>Nothofagus pumilio</i> | GU152883 |
| Eudicotyledons | Nothofagaceae  | <i>Nothofagus</i> | <i>Nothofagus pumilio</i> | GU152884 |
| Eudicotyledons | Nothofagaceae  | <i>Nothofagus</i> | <i>Nothofagus pumilio</i> | GU152885 |
| Eudicotyledons | Lamiaceae      | <i>Mentha</i>     | <i>Mentha spicata</i>     | DQ667354 |
| Eudicotyledons | Lamiaceae      | <i>Mentha</i>     | <i>Mentha spicata</i>     | EU585744 |
| Eudicotyledons | Lamiaceae      | <i>Mentha</i>     | <i>Mentha spicata</i>     | EU627573 |
| Eudicotyledons | Lamiaceae      | <i>Mentha</i>     | <i>Mentha spicata</i>     | EU627578 |
| Eudicotyledons | Lamiaceae      | <i>Mentha</i>     | <i>Mentha spicata</i>     | FR726101 |
| Eudicotyledons | Lamiaceae      | <i>Mentha</i>     | <i>Mentha spicata</i>     | FR726102 |
| Eudicotyledons | Lamiaceae      | <i>Mentha</i>     | <i>Mentha spicata</i>     | FJ513095 |
| Eudicotyledons | Lamiaceae      | <i>Mentha</i>     | <i>Mentha spicata</i>     | AY643666 |
| Eudicotyledons | Lamiaceae      | <i>Mentha</i>     | <i>Mentha spicata</i>     | AY643667 |
| Eudicotyledons | Lamiaceae      | <i>Mentha</i>     | <i>Mentha spicata</i>     | AY643668 |
| Eudicotyledons | Lamiaceae      | <i>Mentha</i>     | <i>Mentha spicata</i>     | AY643669 |
| Eudicotyledons | Lamiaceae      | <i>Mentha</i>     | <i>Mentha spicata</i>     | AY643670 |
| Eudicotyledons | Lamiaceae      | <i>Mentha</i>     | <i>Mentha spicata</i>     | AY643671 |
| Eudicotyledons | Lamiaceae      | <i>Mentha</i>     | <i>Mentha spicata</i>     | AY643672 |
| Eudicotyledons | Lamiaceae      | <i>Mentha</i>     | <i>Mentha spicata</i>     | AY643673 |
| Eudicotyledons | Lamiaceae      | <i>Mentha</i>     | <i>Mentha spicata</i>     | AY643674 |
| Eudicotyledons | Lamiaceae      | <i>Mentha</i>     | <i>Mentha spicata</i>     | AY643675 |
| Eudicotyledons | Lamiaceae      | <i>Mentha</i>     | <i>Mentha spicata</i>     | AY643676 |
| Eudicotyledons | Lamiaceae      | <i>Mentha</i>     | <i>Mentha spicata</i>     | AY643677 |
| Eudicotyledons | Lamiaceae      | <i>Mentha</i>     | <i>Mentha spicata</i>     | AY643678 |
| Eudicotyledons | Lamiaceae      | <i>Mentha</i>     | <i>Mentha spicata</i>     | HQ902826 |
| Eudicotyledons | Lamiaceae      | <i>Mentha</i>     | <i>Mentha spicata</i>     | HQ902827 |
| Eudicotyledons | Lamiaceae      | <i>Mentha</i>     | <i>Mentha spicata</i>     | HQ902854 |
| Eudicotyledons | Lamiaceae      | <i>Mentha</i>     | <i>Mentha spicata</i>     | HQ902865 |
| Eudicotyledons | Rubiaceae      | <i>Galium</i>     | <i>Galium aparine</i>     | HQ596706 |
| Eudicotyledons | Rubiaceae      | <i>Galium</i>     | <i>Galium aparine</i>     | HQ596707 |
| Eudicotyledons | Rubiaceae      | <i>Galium</i>     | <i>Galium aparine</i>     | DQ006223 |
| Eudicotyledons | Plantaginaceae | <i>Plantago</i>   | <i>Plantago major</i>     | GQ248370 |
| Eudicotyledons | Plantaginaceae | <i>Plantago</i>   | <i>Plantago major</i>     | JN407021 |

|                |                |                    |                                |          |
|----------------|----------------|--------------------|--------------------------------|----------|
| Eudicotyledons | Plantaginaceae | <i>Plantago</i>    | <i>Plantago major</i>          | JN407022 |
| Eudicotyledons | Plantaginaceae | <i>Plantago</i>    | <i>Plantago major</i>          | JN407023 |
| Eudicotyledons | Plantaginaceae | <i>Plantago</i>    | <i>Plantago major</i>          | JN407024 |
| Eudicotyledons | Plantaginaceae | <i>Plantago</i>    | <i>Plantago major</i>          | JN407025 |
| Eudicotyledons | Plantaginaceae | <i>Plantago</i>    | <i>Plantago major</i>          | EU750474 |
| Eudicotyledons | Plantaginaceae | <i>Plantago</i>    | <i>Plantago major</i>          | EU750475 |
| Eudicotyledons | Plantaginaceae | <i>Plantago</i>    | <i>Plantago major</i>          | EU750476 |
| Eudicotyledons | Rosaceae       | <i>Amelanchier</i> | <i>Amelanchier alnifolia</i>   | JQ390632 |
| Eudicotyledons | Rosaceae       | <i>Amelanchier</i> | <i>Amelanchier alnifolia</i>   | JQ390643 |
| Eudicotyledons | Rosaceae       | <i>Rubus</i>       | <i>Rubus idaeus</i>            | EU750527 |
| Eudicotyledons | Rosaceae       | <i>Rubus</i>       | <i>Rubus idaeus</i>            | EU750528 |
| Eudicotyledons | Rosaceae       | <i>Rubus</i>       | <i>Rubus idaeus</i>            | EU750529 |
| Eudicotyledons | Rosaceae       | <i>Rubus</i>       | <i>Rubus idaeus</i>            | EU750530 |
| Eudicotyledons | Rosaceae       | <i>Rubus</i>       | <i>Rubus idaeus</i>            | EU750531 |
| Eudicotyledons | Rosaceae       | <i>Sorbaria</i>    | <i>Sorbaria arborea</i>        | JN047232 |
| Eudicotyledons | Rosaceae       | <i>Sorbaria</i>    | <i>Sorbaria arborea</i>        | JN047233 |
| Eudicotyledons | Rosaceae       | <i>Sorbaria</i>    | <i>Sorbaria arborea</i>        | JN047234 |
| Eudicotyledons | Rosaceae       | <i>Sorbaria</i>    | <i>Sorbaria arborea</i>        | JN047235 |
| Eudicotyledons | Solanaceae     | <i>Mandragora</i>  | <i>Mandragora officinarum</i>  | HE659544 |
| Eudicotyledons | Solanaceae     | <i>Mandragora</i>  | <i>Mandragora officinarum</i>  | HQ216173 |
| Eudicotyledons | Solanaceae     | <i>Mandragora</i>  | <i>Mandragora officinarum</i>  | HQ216174 |
| Eudicotyledons | Solanaceae     | <i>Mandragora</i>  | <i>Mandragora officinarum</i>  | HQ216175 |
| Eudicotyledons | Solanaceae     | <i>Mandragora</i>  | <i>Mandragora officinarum</i>  | HQ216176 |
| Eudicotyledons | Solanaceae     | <i>Nolana</i>      | <i>Nolana spathulata</i>       | EU742495 |
| Eudicotyledons | Solanaceae     | <i>Nolana</i>      | <i>Nolana spathulata</i>       | FJ914073 |
| Eudicotyledons | Papaveraceae   | <i>Papaver</i>     | <i>Papaver rhoeas</i>          | GQ248360 |
| Eudicotyledons | Papaveraceae   | <i>Papaver</i>     | <i>Papaver rhoeas</i>          | JN584665 |
| Eudicotyledons | Papaveraceae   | <i>Papaver</i>     | <i>Papaver rhoeas</i>          | EF590721 |
| Eudicotyledons | Lamiaceae      | <i>Mentha</i>      | <i>Mentha x piperita</i>       | FR726096 |
| Eudicotyledons | Lamiaceae      | <i>Mentha</i>      | <i>Mentha x piperita</i>       | FR726097 |
| Eudicotyledons | Lamiaceae      | <i>Mentha</i>      | <i>Mentha x piperita</i>       | FR726098 |
| Eudicotyledons | Lamiaceae      | <i>Mentha</i>      | <i>Mentha x piperita</i>       | AY643698 |
| Eudicotyledons | Lamiaceae      | <i>Mentha</i>      | <i>Mentha x piperita</i>       | AY643699 |
| Eudicotyledons | Lamiaceae      | <i>Mentha</i>      | <i>Mentha x piperita</i>       | AY643700 |
| Eudicotyledons | Lamiaceae      | <i>Mentha</i>      | <i>Mentha x piperita</i>       | AY643701 |
| Eudicotyledons | Lamiaceae      | <i>Mentha</i>      | <i>Mentha x piperita</i>       | AY643702 |
| Eudicotyledons | Lamiaceae      | <i>Mentha</i>      | <i>Mentha x piperita</i>       | AY643703 |
| Eudicotyledons | Lamiaceae      | <i>Mentha</i>      | <i>Mentha x piperita</i>       | AY643704 |
| Eudicotyledons | Lamiaceae      | <i>Mentha</i>      | <i>Mentha x piperita</i>       | AY643705 |
| Eudicotyledons | Lamiaceae      | <i>Mentha</i>      | <i>Mentha x piperita</i>       | AY643706 |
| Eudicotyledons | Lamiaceae      | <i>Mentha</i>      | <i>Mentha x piperita</i>       | AY643707 |
| Eudicotyledons | Rosaceae       | <i>Amelanchier</i> | <i>Amelanchier bartramiana</i> | JQ390641 |
| Eudicotyledons | Rosaceae       | <i>Amelanchier</i> | <i>Amelanchier bartramiana</i> | EU500285 |
| Eudicotyledons | Rosaceae       | <i>Crataegus</i>   | <i>Crataegus mollis</i>        | EF127122 |
| Eudicotyledons | Rosaceae       | <i>Crataegus</i>   | <i>Crataegus mollis</i>        | GU562402 |
| Eudicotyledons | Rosaceae       | <i>Crataegus</i>   | <i>Crataegus mollis</i>        | HQ596656 |
| Eudicotyledons | Rosaceae       | <i>Crataegus</i>   | <i>Crataegus mollis</i>        | HQ596657 |
| Eudicotyledons | Rosaceae       | <i>Crataegus</i>   | <i>Crataegus mollis</i>        | HQ596658 |
| Eudicotyledons | Rosaceae       | <i>Aronia</i>      | <i>Aronia arbutifolia</i>      | JQ390630 |
| Eudicotyledons | Rosaceae       | <i>Aronia</i>      | <i>Aronia arbutifolia</i>      | GQ305339 |
| Eudicotyledons | Rutaceae       | <i>Citrus</i>      | <i>Citrus maxima</i>           | GQ267053 |
| Eudicotyledons | Rutaceae       | <i>Citrus</i>      | <i>Citrus maxima</i>           | GQ267054 |
| Eudicotyledons | Rutaceae       | <i>Citrus</i>      | <i>Citrus maxima</i>           | GQ267055 |

|                |               |                   |                           |          |
|----------------|---------------|-------------------|---------------------------|----------|
| Eudicotyledons | Rutaceae      | <i>Citrus</i>     | <i>Citrus maxima</i>      | GQ267056 |
| Eudicotyledons | Rutaceae      | <i>Citrus</i>     | <i>Citrus maxima</i>      | GQ267057 |
| Eudicotyledons | Rutaceae      | <i>Citrus</i>     | <i>Citrus maxima</i>      | GQ267058 |
| Eudicotyledons | Rutaceae      | <i>Citrus</i>     | <i>Citrus maxima</i>      | GQ267059 |
| Eudicotyledons | Rutaceae      | <i>Citrus</i>     | <i>Citrus maxima</i>      | GQ267060 |
| Eudicotyledons | Rutaceae      | <i>Citrus</i>     | <i>Citrus maxima</i>      | GQ267061 |
| Eudicotyledons | Rutaceae      | <i>Citrus</i>     | <i>Citrus maxima</i>      | GQ267065 |
| Eudicotyledons | Rutaceae      | <i>Citrus</i>     | <i>Citrus maxima</i>      | GQ435433 |
| Eudicotyledons | Rutaceae      | <i>Citrus</i>     | <i>Citrus maxima</i>      | GQ435434 |
| Eudicotyledons | Rutaceae      | <i>Citrus</i>     | <i>Citrus maxima</i>      | GQ435442 |
| Eudicotyledons | Rutaceae      | <i>Citrus</i>     | <i>Citrus maxima</i>      | GQ435443 |
| Eudicotyledons | Rutaceae      | <i>Citrus</i>     | <i>Citrus maxima</i>      | GQ435444 |
| Eudicotyledons | Rutaceae      | <i>Citrus</i>     | <i>Citrus maxima</i>      | GQ435445 |
| Eudicotyledons | Rutaceae      | <i>Citrus</i>     | <i>Citrus maxima</i>      | GQ435446 |
| Eudicotyledons | Rutaceae      | <i>Citrus</i>     | <i>Citrus maxima</i>      | JN315364 |
| Eudicotyledons | Rutaceae      | <i>Citrus</i>     | <i>Citrus maxima</i>      | JN315365 |
| Eudicotyledons | Rutaceae      | <i>Citrus</i>     | <i>Citrus x paradisi</i>  | JN315366 |
| Eudicotyledons | Rutaceae      | <i>Citrus</i>     | <i>Citrus x paradisi</i>  | JN315367 |
| Eudicotyledons | Rutaceae      | <i>Citrus</i>     | <i>Citrus x paradisi</i>  | HM446909 |
| Eudicotyledons | Betulaceae    | <i>Alnus</i>      | <i>Alnus alnobetula</i>   | FJ844483 |
| Eudicotyledons | Betulaceae    | <i>Alnus</i>      | <i>Alnus alnobetula</i>   | FJ844484 |
| Eudicotyledons | Betulaceae    | <i>Alnus</i>      | <i>Alnus alnobetula</i>   | FJ844487 |
| Eudicotyledons | Betulaceae    | <i>Alnus</i>      | <i>Alnus alnobetula</i>   | FJ844488 |
| Eudicotyledons | Ranunculaceae | <i>Coptis</i>     | <i>Coptis trifolia</i>    | AB159539 |
| Eudicotyledons | Ranunculaceae | <i>Coptis</i>     | <i>Coptis trifolia</i>    | AB159541 |
| Eudicotyledons | Lamiaceae     | <i>Mentha</i>     | <i>Mentha longifolia</i>  | AY643679 |
| Eudicotyledons | Lamiaceae     | <i>Mentha</i>     | <i>Mentha longifolia</i>  | AY643680 |
| Eudicotyledons | Lamiaceae     | <i>Mentha</i>     | <i>Mentha longifolia</i>  | AY643681 |
| Eudicotyledons | Lamiaceae     | <i>Mentha</i>     | <i>Mentha longifolia</i>  | AY643682 |
| Eudicotyledons | Lamiaceae     | <i>Mentha</i>     | <i>Mentha longifolia</i>  | AY643683 |
| Eudicotyledons | Lamiaceae     | <i>Mentha</i>     | <i>Mentha longifolia</i>  | AY643684 |
| Eudicotyledons | Lamiaceae     | <i>Mentha</i>     | <i>Mentha longifolia</i>  | AY643685 |
| Eudicotyledons | Lamiaceae     | <i>Mentha</i>     | <i>Mentha longifolia</i>  | AY643686 |
| Eudicotyledons | Lamiaceae     | <i>Mentha</i>     | <i>Mentha longifolia</i>  | HQ902825 |
| Eudicotyledons | Lamiaceae     | <i>Mentha</i>     | <i>Mentha suaveolens</i>  | AY643687 |
| Eudicotyledons | Lamiaceae     | <i>Mentha</i>     | <i>Mentha suaveolens</i>  | AY643688 |
| Eudicotyledons | Lamiaceae     | <i>Mentha</i>     | <i>Mentha suaveolens</i>  | AY643689 |
| Eudicotyledons | Lamiaceae     | <i>Mentha</i>     | <i>Mentha suaveolens</i>  | AY643690 |
| Eudicotyledons | Lamiaceae     | <i>Mentha</i>     | <i>Mentha suaveolens</i>  | AY643691 |
| Eudicotyledons | Lamiaceae     | <i>Mentha</i>     | <i>Mentha suaveolens</i>  | AY643692 |
| Eudicotyledons | Lamiaceae     | <i>Mentha</i>     | <i>Mentha suaveolens</i>  | AY643693 |
| Eudicotyledons | Lamiaceae     | <i>Mentha</i>     | <i>Mentha suaveolens</i>  | AY643694 |
| Eudicotyledons | Lamiaceae     | <i>Mentha</i>     | <i>Mentha suaveolens</i>  | AY643695 |
| Eudicotyledons | Lamiaceae     | <i>Mentha</i>     | <i>Mentha suaveolens</i>  | AY643696 |
| Eudicotyledons | Lamiaceae     | <i>Mentha</i>     | <i>Mentha suaveolens</i>  | AY643697 |
| Eudicotyledons | Lamiaceae     | <i>Mentha</i>     | <i>Mentha suaveolens</i>  | HQ902829 |
| Eudicotyledons | Lamiaceae     | <i>Mentha</i>     | <i>Mentha suaveolens</i>  | HQ902855 |
| Eudicotyledons | Ranunculaceae | <i>Ranunculus</i> | <i>Ranunculus enysii</i>  | FJ744171 |
| Eudicotyledons | Ranunculaceae | <i>Ranunculus</i> | <i>Ranunculus enysii</i>  | FJ744172 |
| Eudicotyledons | Lamiaceae     | <i>Salvia</i>     | <i>Salvia officinalis</i> | JQ339263 |
| Eudicotyledons | Lamiaceae     | <i>Salvia</i>     | <i>Salvia officinalis</i> | DQ667342 |
| Eudicotyledons | Lamiaceae     | <i>Salvia</i>     | <i>Salvia officinalis</i> | FR726139 |
| Eudicotyledons | Lamiaceae     | <i>Salvia</i>     | <i>Salvia officinalis</i> | FR726140 |

|                |                |                    |                                 |          |
|----------------|----------------|--------------------|---------------------------------|----------|
| Eudicotyledons | Lamiaceae      | <i>Salvia</i>      | <i>Salvia officinalis</i>       | FR726141 |
| Eudicotyledons | Lamiaceae      | <i>Salvia</i>      | <i>Salvia officinalis</i>       | FJ513122 |
| Eudicotyledons | Lamiaceae      | <i>Salvia</i>      | <i>Salvia sclarea</i>           | FR726143 |
| Eudicotyledons | Lamiaceae      | <i>Salvia</i>      | <i>Salvia sclarea</i>           | FJ513083 |
| Eudicotyledons | Plantaginaceae | <i>Plantago</i>    | <i>Plantago lanceolata</i>      | FJ395538 |
| Eudicotyledons | Plantaginaceae | <i>Plantago</i>    | <i>Plantago lanceolata</i>      | GQ248368 |
| Eudicotyledons | Plantaginaceae | <i>Plantago</i>    | <i>Plantago lanceolata</i>      | GQ248369 |
| Eudicotyledons | Plantaginaceae | <i>Plantago</i>    | <i>Plantago lanceolata</i>      | EU036257 |
| Eudicotyledons | Plantaginaceae | <i>Plantago</i>    | <i>Plantago lanceolata</i>      | EU750471 |
| Eudicotyledons | Plantaginaceae | <i>Plantago</i>    | <i>Plantago lanceolata</i>      | EU750472 |
| Eudicotyledons | Plantaginaceae | <i>Plantago</i>    | <i>Plantago lanceolata</i>      | EU750473 |
| Eudicotyledons | Rutaceae       | <i>Citrus</i>      | <i>Citrus aurantium</i>         | GQ248267 |
| Eudicotyledons | Rutaceae       | <i>Citrus</i>      | <i>Citrus aurantium</i>         | EF590679 |
| Eudicotyledons | Gesneriaceae   | <i>Glossoloma</i>  | <i>Glossoloma ichthyoderma</i>  | DQ006190 |
| Eudicotyledons | Gesneriaceae   | <i>Glossoloma</i>  | <i>Glossoloma ichthyoderma</i>  | DQ211214 |
| Eudicotyledons | Lamiaceae      | <i>Salvia</i>      | <i>Salvia pyrenaica</i>         | HQ902842 |
| Eudicotyledons | Lamiaceae      | <i>Salvia</i>      | <i>Salvia pyrenaica</i>         | HQ902871 |
| Eudicotyledons | Lamiaceae      | <i>Salvia</i>      | <i>Salvia uliginosa</i>         | HQ418947 |
| Eudicotyledons | Lamiaceae      | <i>Salvia</i>      | <i>Salvia uliginosa</i>         | FR726144 |
| Eudicotyledons | Lamiaceae      | <i>Salvia</i>      | <i>Salvia viridis</i>           | HQ902843 |
| Eudicotyledons | Lamiaceae      | <i>Salvia</i>      | <i>Salvia viridis</i>           | HQ902861 |
| Eudicotyledons | Gentianaceae   | <i>Gentiana</i>    | <i>Gentiana algida</i>          | HM460868 |
| Eudicotyledons | Gentianaceae   | <i>Gentiana</i>    | <i>Gentiana algida</i>          | HM460869 |
| Eudicotyledons | Gentianaceae   | <i>Gentiana</i>    | <i>Gentiana algida</i>          | HM460870 |
| Eudicotyledons | Gentianaceae   | <i>Gentiana</i>    | <i>Gentiana straminea</i>       | GQ435167 |
| Eudicotyledons | Gentianaceae   | <i>Gentiana</i>    | <i>Gentiana straminea</i>       | GQ435168 |
| Eudicotyledons | Rosaceae       | <i>Amelanchier</i> | <i>Amelanchier arborea</i>      | EF127152 |
| Eudicotyledons | Rosaceae       | <i>Amelanchier</i> | <i>Amelanchier arborea</i>      | JQ390642 |
| Eudicotyledons | Rosaceae       | <i>Amelanchier</i> | <i>Amelanchier laevis</i>       | JQ390635 |
| Eudicotyledons | Rosaceae       | <i>Amelanchier</i> | <i>Amelanchier laevis</i>       | HQ596593 |
| Eudicotyledons | Hydrangeaceae  | <i>Hydrangea</i>   | <i>Hydrangea paniculata</i>     | HQ427003 |
| Eudicotyledons | Hydrangeaceae  | <i>Hydrangea</i>   | <i>Hydrangea paniculata</i>     | HM216984 |
| Eudicotyledons | Gentianaceae   | <i>Gentiana</i>    | <i>Gentiana triflora</i>        | GQ864031 |
| Eudicotyledons | Gentianaceae   | <i>Gentiana</i>    | <i>Gentiana triflora</i>        | GQ864032 |
| Eudicotyledons | Rosaceae       | <i>Potentilla</i>  | <i>Potentilla anserina</i>      | GQ384974 |
| Eudicotyledons | Rosaceae       | <i>Potentilla</i>  | <i>Potentilla anserina</i>      | FN668452 |
| Eudicotyledons | Rosaceae       | <i>Potentilla</i>  | <i>Potentilla reptans</i>       | FJ395525 |
| Eudicotyledons | Rosaceae       | <i>Potentilla</i>  | <i>Potentilla reptans</i>       | GQ384955 |
| Eudicotyledons | Rosaceae       | <i>Potentilla</i>  | <i>Potentilla nivea</i>         | DQ778819 |
| Eudicotyledons | Rosaceae       | <i>Potentilla</i>  | <i>Potentilla nivea</i>         | GQ384988 |
| Eudicotyledons | Rosaceae       | <i>Potentilla</i>  | <i>Potentilla nivea</i>         | GQ435275 |
| Eudicotyledons | Asteraceae     | <i>Senecio</i>     | <i>Senecio inaequidens</i>      | JN789928 |
| Eudicotyledons | Asteraceae     | <i>Senecio</i>     | <i>Senecio inaequidens</i>      | JN789929 |
| Eudicotyledons | Asteraceae     | <i>Senecio</i>     | <i>Senecio inaequidens</i>      | JN789930 |
| Eudicotyledons | Asteraceae     | <i>Senecio</i>     | <i>Senecio madagascariensis</i> | JN789939 |
| Eudicotyledons | Asteraceae     | <i>Senecio</i>     | <i>Senecio madagascariensis</i> | JN789949 |
| Eudicotyledons | Caprifoliaceae | <i>Valeriana</i>   | <i>Valeriana jatamansi</i>      | GU477680 |
| Eudicotyledons | Caprifoliaceae | <i>Valeriana</i>   | <i>Valeriana jatamansi</i>      | GU477681 |
| Eudicotyledons | Caprifoliaceae | <i>Valeriana</i>   | <i>Valeriana jatamansi</i>      | GU477682 |
| Eudicotyledons | Caprifoliaceae | <i>Valeriana</i>   | <i>Valeriana jatamansi</i>      | GU477683 |
| Eudicotyledons | Caprifoliaceae | <i>Valeriana</i>   | <i>Valeriana jatamansi</i>      | GU477684 |
| Eudicotyledons | Caprifoliaceae | <i>Valeriana</i>   | <i>Valeriana jatamansi</i>      | GU477685 |
| Eudicotyledons | Caprifoliaceae | <i>Valeriana</i>   | <i>Valeriana jatamansi</i>      | GU477686 |

|                |                |                   |                                |          |
|----------------|----------------|-------------------|--------------------------------|----------|
| Eudicotyledons | Caprifoliaceae | <i>Valeriana</i>  | <i>Valeriana jatamansi</i>     | GU477687 |
| Eudicotyledons | Caprifoliaceae | <i>Valeriana</i>  | <i>Valeriana jatamansi</i>     | GQ434936 |
| Eudicotyledons | Rubiaceae      | <i>Psychotria</i> | <i>Psychotria deflexa</i>      | GQ982339 |
| Eudicotyledons | Rubiaceae      | <i>Psychotria</i> | <i>Psychotria deflexa</i>      | HM446991 |
| Eudicotyledons | Hydrangeaceae  | <i>Hydrangea</i>  | <i>Hydrangea quercifolia</i>   | EF694837 |
| Eudicotyledons | Hydrangeaceae  | <i>Hydrangea</i>  | <i>Hydrangea quercifolia</i>   | HM216987 |
| Eudicotyledons | Brassicaceae   | <i>Lepidium</i>   | <i>Lepidium campestre</i>      | GU562410 |
| Eudicotyledons | Brassicaceae   | <i>Lepidium</i>   | <i>Lepidium campestre</i>      | HQ596746 |
| Eudicotyledons | Moraceae       | <i>Ficus</i>      | <i>Ficus microcarpa</i>        | JN407002 |
| Eudicotyledons | Moraceae       | <i>Ficus</i>      | <i>Ficus microcarpa</i>        | JN407003 |
| Eudicotyledons | Moraceae       | <i>Ficus</i>      | <i>Ficus microcarpa</i>        | JN407004 |
| Eudicotyledons | Moraceae       | <i>Ficus</i>      | <i>Ficus microcarpa</i>        | JN407005 |
| Eudicotyledons | Moraceae       | <i>Ficus</i>      | <i>Ficus microcarpa</i>        | GU135301 |
| Eudicotyledons | Moraceae       | <i>Ficus</i>      | <i>Ficus religiosa</i>         | GU935104 |
| Eudicotyledons | Moraceae       | <i>Ficus</i>      | <i>Ficus religiosa</i>         | GU935105 |
| Eudicotyledons | Moraceae       | <i>Ficus</i>      | <i>Ficus religiosa</i>         | GU935106 |
| Eudicotyledons | Moraceae       | <i>Ficus</i>      | <i>Ficus religiosa</i>         | GU935107 |
| Eudicotyledons | Moraceae       | <i>Ficus</i>      | <i>Ficus religiosa</i>         | GU935108 |
| Eudicotyledons | Moraceae       | <i>Ficus</i>      | <i>Ficus religiosa</i>         | GU935109 |
| Eudicotyledons | Moraceae       | <i>Ficus</i>      | <i>Ficus religiosa</i>         | GU935110 |
| Eudicotyledons | Rosaceae       | <i>Rubus</i>      | <i>Rubus allegheniensis</i>    | EU750524 |
| Eudicotyledons | Rosaceae       | <i>Rubus</i>      | <i>Rubus allegheniensis</i>    | EU750525 |
| Eudicotyledons | Rosaceae       | <i>Rubus</i>      | <i>Rubus allegheniensis</i>    | EU750526 |
| Eudicotyledons | Rosaceae       | <i>Rubus</i>      | <i>Rubus crataegifolius</i>    | GU980801 |
| Eudicotyledons | Rosaceae       | <i>Rubus</i>      | <i>Rubus crataegifolius</i>    | GU980802 |
| Eudicotyledons | Rosaceae       | <i>Rubus</i>      | <i>Rubus crataegifolius</i>    | GU980803 |
| Eudicotyledons | Rosaceae       | <i>Rubus</i>      | <i>Rubus crataegifolius</i>    | GU980804 |
| Eudicotyledons | Rosaceae       | <i>Rubus</i>      | <i>Rubus crataegifolius</i>    | GU980805 |
| Eudicotyledons | Rosaceae       | <i>Rubus</i>      | <i>Rubus crataegifolius</i>    | GU980806 |
| Eudicotyledons | Rosaceae       | <i>Rubus</i>      | <i>Rubus crataegifolius</i>    | GU980807 |
| Eudicotyledons | Rosaceae       | <i>Rubus</i>      | <i>Rubus crataegifolius</i>    | GU980808 |
| Eudicotyledons | Rosaceae       | <i>Rubus</i>      | <i>Rubus crataegifolius</i>    | GU980809 |
| Eudicotyledons | Rosaceae       | <i>Rubus</i>      | <i>Rubus crataegifolius</i>    | GU980810 |
| Eudicotyledons | Rosaceae       | <i>Rubus</i>      | <i>Rubus crataegifolius</i>    | GU980811 |
| Eudicotyledons | Rosaceae       | <i>Rubus</i>      | <i>Rubus crataegifolius</i>    | GU980812 |
| Eudicotyledons | Rosaceae       | <i>Rubus</i>      | <i>Rubus crataegifolius</i>    | GU980813 |
| Eudicotyledons | Rosaceae       | <i>Rubus</i>      | <i>Rubus crataegifolius</i>    | GU980814 |
| Eudicotyledons | Rosaceae       | <i>Rubus</i>      | <i>Rubus crataegifolius</i>    | GU980815 |
| Eudicotyledons | Rosaceae       | <i>Rubus</i>      | <i>Rubus crataegifolius</i>    | GQ435264 |
| Eudicotyledons | Rosaceae       | <i>Rubus</i>      | <i>Rubus occidentalis</i>      | HQ596824 |
| Eudicotyledons | Rosaceae       | <i>Rubus</i>      | <i>Rubus occidentalis</i>      | EU750532 |
| Eudicotyledons | Rosaceae       | <i>Rubus</i>      | <i>Rubus occidentalis</i>      | EU750533 |
| Eudicotyledons | Rosaceae       | <i>Rubus</i>      | <i>Rubus occidentalis</i>      | EU750534 |
| Eudicotyledons | Rosaceae       | <i>Rubus</i>      | <i>Rubus occidentalis</i>      | EU750535 |
| Eudicotyledons | Rosaceae       | <i>Rubus</i>      | <i>Rubus odoratus</i>          | EU750536 |
| Eudicotyledons | Rosaceae       | <i>Rubus</i>      | <i>Rubus odoratus</i>          | EU750537 |
| Eudicotyledons | Asteraceae     | <i>Senecio</i>    | <i>Senecio vulgaris</i>        | FJ395482 |
| Eudicotyledons | Asteraceae     | <i>Senecio</i>    | <i>Senecio vulgaris</i>        | EF538071 |
| Eudicotyledons | Rubiaceae      | <i>Psychotria</i> | <i>Psychotria rubra</i>        | JN407051 |
| Eudicotyledons | Rubiaceae      | <i>Psychotria</i> | <i>Psychotria rubra</i>        | JN407052 |
| Eudicotyledons | Rubiaceae      | <i>Psychotria</i> | <i>Psychotria rubra</i>        | JN407053 |
| Eudicotyledons | Rubiaceae      | <i>Psychotria</i> | <i>Psychotria rubra</i>        | JN407054 |
| Eudicotyledons | Rubiaceae      | <i>Psychotria</i> | <i>Psychotria graciliflora</i> | FJ208668 |

|                |               |                   |                                |          |
|----------------|---------------|-------------------|--------------------------------|----------|
| Eudicotyledons | Rubiaceae     | <i>Psychotria</i> | <i>Psychotria graciliflora</i> | FJ208669 |
| Eudicotyledons | Rubiaceae     | <i>Psychotria</i> | <i>Psychotria graciliflora</i> | GQ982340 |
| Eudicotyledons | Verbenaceae   | <i>Verbena</i>    | <i>Verbena officinalis</i>     | GQ435187 |
| Eudicotyledons | Verbenaceae   | <i>Verbena</i>    | <i>Verbena officinalis</i>     | GQ435188 |
| Eudicotyledons | Solanaceae    | <i>Nolana</i>     | <i>Nolana cerrateana</i>       | EU742453 |
| Eudicotyledons | Solanaceae    | <i>Nolana</i>     | <i>Nolana cerrateana</i>       | FJ914079 |
| Eudicotyledons | Solanaceae    | <i>Nolana</i>     | <i>Nolana humifusa</i>         | EU742468 |
| Eudicotyledons | Solanaceae    | <i>Nolana</i>     | <i>Nolana humifusa</i>         | FJ914067 |
| Eudicotyledons | Solanaceae    | <i>Nolana</i>     | <i>Nolana humifusa</i>         | FJ914068 |
| Eudicotyledons | Solanaceae    | <i>Nolana</i>     | <i>Nolana humifusa</i>         | FJ914085 |
| Eudicotyledons | Solanaceae    | <i>Nolana</i>     | <i>Nolana humifusa</i>         | FJ914086 |
| Eudicotyledons | Solanaceae    | <i>Nolana</i>     | <i>Nolana humifusa</i>         | FJ914089 |
| Eudicotyledons | Solanaceae    | <i>Nolana</i>     | <i>Nolana humifusa</i>         | FJ914090 |
| Eudicotyledons | Solanaceae    | <i>Nolana</i>     | <i>Nolana lycioides</i>        | EU742479 |
| Eudicotyledons | Solanaceae    | <i>Nolana</i>     | <i>Nolana lycioides</i>        | FJ914087 |
| Eudicotyledons | Solanaceae    | <i>Nolana</i>     | <i>Nolana peruviana</i>        | EU742484 |
| Eudicotyledons | Solanaceae    | <i>Nolana</i>     | <i>Nolana peruviana</i>        | EU742485 |
| Eudicotyledons | Solanaceae    | <i>Nolana</i>     | <i>Nolana stenophylla</i>      | EU742497 |
| Eudicotyledons | Solanaceae    | <i>Nolana</i>     | <i>Nolana stenophylla</i>      | FJ914074 |
| Eudicotyledons | Rutaceae      | <i>Citrus</i>     | <i>Citrus reticulata</i>       | GQ248268 |
| Eudicotyledons | Rutaceae      | <i>Citrus</i>     | <i>Citrus reticulata</i>       | GQ267062 |
| Eudicotyledons | Rutaceae      | <i>Citrus</i>     | <i>Citrus reticulata</i>       | GQ267063 |
| Eudicotyledons | Rutaceae      | <i>Citrus</i>     | <i>Citrus reticulata</i>       | GQ435438 |
| Eudicotyledons | Rutaceae      | <i>Citrus</i>     | <i>Citrus reticulata</i>       | EF590680 |
| Eudicotyledons | Fabaceae      | <i>Astragalus</i> | <i>Astragalus chinensis</i>    | GU396745 |
| Eudicotyledons | Fabaceae      | <i>Astragalus</i> | <i>Astragalus chinensis</i>    | GQ434966 |
| Eudicotyledons | Crassulaceae  | <i>Aeonium</i>    | <i>Aeonium percarneum</i>      | AY082210 |
| Eudicotyledons | Crassulaceae  | <i>Aeonium</i>    | <i>Aeonium percarneum</i>      | AY082211 |
| Eudicotyledons | Crassulaceae  | <i>Aeonium</i>    | <i>Aeonium aureum</i>          | AY082186 |
| Eudicotyledons | Crassulaceae  | <i>Aeonium</i>    | <i>Aeonium aureum</i>          | AY082187 |
| Eudicotyledons | Hydrangeaceae | <i>Hydrangea</i>  | <i>Hydrangea arborescens</i>   | DQ006194 |
| Eudicotyledons | Hydrangeaceae | <i>Hydrangea</i>  | <i>Hydrangea arborescens</i>   | HM216966 |
| Eudicotyledons | Hydrangeaceae | <i>Hydrangea</i>  | <i>Hydrangea arborescens</i>   | JF321259 |
| Eudicotyledons | Fagaceae      | <i>Quercus</i>    | <i>Quercus phillyraeoides</i>  | HQ427017 |
| Eudicotyledons | Fagaceae      | <i>Quercus</i>    | <i>Quercus phillyraeoides</i>  | AB650376 |
| Eudicotyledons | Fagaceae      | <i>Quercus</i>    | <i>Quercus phillyraeoides</i>  | AB650377 |
| Eudicotyledons | Fagaceae      | <i>Quercus</i>    | <i>Quercus phillyraeoides</i>  | AB650378 |
| Eudicotyledons | Fagaceae      | <i>Quercus</i>    | <i>Quercus phillyraeoides</i>  | AB650379 |
| Eudicotyledons | Fagaceae      | <i>Quercus</i>    | <i>Quercus phillyraeoides</i>  | AB650380 |
| Eudicotyledons | Fagaceae      | <i>Quercus</i>    | <i>Quercus phillyraeoides</i>  | AB650381 |
| Eudicotyledons | Fagaceae      | <i>Quercus</i>    | <i>Quercus phillyraeoides</i>  | AB650382 |
| Eudicotyledons | Fagaceae      | <i>Quercus</i>    | <i>Quercus phillyraeoides</i>  | AB650383 |
| Eudicotyledons | Fagaceae      | <i>Quercus</i>    | <i>Quercus phillyraeoides</i>  | AB650384 |
| Eudicotyledons | Fagaceae      | <i>Quercus</i>    | <i>Quercus phillyraeoides</i>  | AB650385 |
| Eudicotyledons | Fagaceae      | <i>Quercus</i>    | <i>Quercus phillyraeoides</i>  | AB650386 |
| Eudicotyledons | Fagaceae      | <i>Quercus</i>    | <i>Quercus phillyraeoides</i>  | AB650387 |
| Eudicotyledons | Fagaceae      | <i>Quercus</i>    | <i>Quercus phillyraeoides</i>  | AB650388 |
| Eudicotyledons | Fagaceae      | <i>Quercus</i>    | <i>Quercus phillyraeoides</i>  | AB650389 |
| Eudicotyledons | Fagaceae      | <i>Quercus</i>    | <i>Quercus phillyraeoides</i>  | AB650390 |
| Eudicotyledons | Fagaceae      | <i>Quercus</i>    | <i>Quercus phillyraeoides</i>  | AB650391 |
| Eudicotyledons | Fagaceae      | <i>Quercus</i>    | <i>Quercus phillyraeoides</i>  | AB650392 |
| Eudicotyledons | Fagaceae      | <i>Quercus</i>    | <i>Quercus phillyraeoides</i>  | AB650393 |
| Eudicotyledons | Fagaceae      | <i>Quercus</i>    | <i>Quercus phillyraeoides</i>  | AB650394 |













|                |                |                 |                         |          |
|----------------|----------------|-----------------|-------------------------|----------|
| Eudicotyledons | Moraceae       | <i>Ficus</i>    | <i>Ficus insipida</i>   | GQ438205 |
| Eudicotyledons | Moraceae       | <i>Ficus</i>    | <i>Ficus insipida</i>   | GQ438206 |
| Eudicotyledons | Moraceae       | <i>Ficus</i>    | <i>Ficus insipida</i>   | GQ438207 |
| Eudicotyledons | Moraceae       | <i>Ficus</i>    | <i>Ficus insipida</i>   | GQ438208 |
| Eudicotyledons | Moraceae       | <i>Ficus</i>    | <i>Ficus insipida</i>   | GQ438209 |
| Eudicotyledons | Moraceae       | <i>Ficus</i>    | <i>Ficus insipida</i>   | GQ438210 |
| Eudicotyledons | Moraceae       | <i>Ficus</i>    | <i>Ficus insipida</i>   | GQ438211 |
| Eudicotyledons | Moraceae       | <i>Ficus</i>    | <i>Ficus insipida</i>   | GQ982221 |
| Eudicotyledons | Moraceae       | <i>Ficus</i>    | <i>Ficus racemosa</i>   | GU935097 |
| Eudicotyledons | Moraceae       | <i>Ficus</i>    | <i>Ficus racemosa</i>   | GU935098 |
| Eudicotyledons | Moraceae       | <i>Ficus</i>    | <i>Ficus racemosa</i>   | GU935099 |
| Eudicotyledons | Moraceae       | <i>Ficus</i>    | <i>Ficus racemosa</i>   | GU935100 |
| Eudicotyledons | Moraceae       | <i>Ficus</i>    | <i>Ficus racemosa</i>   | JN044534 |
| Eudicotyledons | Moraceae       | <i>Ficus</i>    | <i>Ficus racemosa</i>   | JN044535 |
| Eudicotyledons | Moraceae       | <i>Ficus</i>    | <i>Ficus tinctoria</i>  | JN044542 |
| Eudicotyledons | Moraceae       | <i>Ficus</i>    | <i>Ficus tinctoria</i>  | JN044543 |
| Eudicotyledons | Moraceae       | <i>Ficus</i>    | <i>Ficus tinctoria</i>  | JN044544 |
| Eudicotyledons | Moraceae       | <i>Ficus</i>    | <i>Ficus virens</i>     | GU935116 |
| Eudicotyledons | Moraceae       | <i>Ficus</i>    | <i>Ficus virens</i>     | GU935117 |
| Eudicotyledons | Plantaginaceae | <i>Plantago</i> | <i>Plantago rugelii</i> | EF590728 |
| Eudicotyledons | Plantaginaceae | <i>Plantago</i> | <i>Plantago rugelii</i> | DQ006212 |
| Eudicotyledons | Plantaginaceae | <i>Plantago</i> | <i>Plantago rugelii</i> | EU750477 |
| Eudicotyledons | Plantaginaceae | <i>Plantago</i> | <i>Plantago rugelii</i> | EU750478 |
| Eudicotyledons | Betulaceae     | <i>Alnus</i>    | <i>Alnus cordata</i>    | FJ844542 |
| Eudicotyledons | Betulaceae     | <i>Alnus</i>    | <i>Alnus cordata</i>    | FJ844543 |
| Eudicotyledons | Betulaceae     | <i>Alnus</i>    | <i>Alnus cordata</i>    | FJ844544 |
| Eudicotyledons | Betulaceae     | <i>Alnus</i>    | <i>Alnus firma</i>      | FJ844493 |
| Eudicotyledons | Betulaceae     | <i>Alnus</i>    | <i>Alnus firma</i>      | FJ844494 |
| Eudicotyledons | Betulaceae     | <i>Alnus</i>    | <i>Alnus firma</i>      | FJ844495 |
| Eudicotyledons | Betulaceae     | <i>Alnus</i>    | <i>Alnus firma</i>      | FJ844496 |
| Eudicotyledons | Betulaceae     | <i>Alnus</i>    | <i>Alnus firma</i>      | FJ844497 |
| Eudicotyledons | Betulaceae     | <i>Alnus</i>    | <i>Alnus formosana</i>  | FJ844545 |
| Eudicotyledons | Betulaceae     | <i>Alnus</i>    | <i>Alnus formosana</i>  | FJ844546 |
| Eudicotyledons | Betulaceae     | <i>Alnus</i>    | <i>Alnus hirsuta</i>    | FJ011869 |
| Eudicotyledons | Betulaceae     | <i>Alnus</i>    | <i>Alnus hirsuta</i>    | FJ844520 |
| Eudicotyledons | Betulaceae     | <i>Alnus</i>    | <i>Alnus hirsuta</i>    | FJ844521 |
| Eudicotyledons | Betulaceae     | <i>Alnus</i>    | <i>Alnus hirsuta</i>    | FJ844523 |
| Eudicotyledons | Betulaceae     | <i>Alnus</i>    | <i>Alnus hirsuta</i>    | FJ844524 |
| Eudicotyledons | Betulaceae     | <i>Alnus</i>    | <i>Alnus hirsuta</i>    | FJ844525 |
| Eudicotyledons | Betulaceae     | <i>Alnus</i>    | <i>Alnus hirsuta</i>    | FJ844526 |
| Eudicotyledons | Betulaceae     | <i>Alnus</i>    | <i>Alnus hirsuta</i>    | FJ844527 |
| Eudicotyledons | Betulaceae     | <i>Alnus</i>    | <i>Alnus hirsuta</i>    | FJ844528 |
| Eudicotyledons | Betulaceae     | <i>Alnus</i>    | <i>Alnus hirsuta</i>    | FJ844529 |
| Eudicotyledons | Betulaceae     | <i>Alnus</i>    | <i>Alnus hirsuta</i>    | FJ844531 |
| Eudicotyledons | Betulaceae     | <i>Alnus</i>    | <i>Alnus hirsuta</i>    | JN043792 |
| Eudicotyledons | Betulaceae     | <i>Alnus</i>    | <i>Alnus hirsuta</i>    | JN043793 |
| Eudicotyledons | Betulaceae     | <i>Alnus</i>    | <i>Alnus hirsuta</i>    | JN043794 |
| Eudicotyledons | Betulaceae     | <i>Alnus</i>    | <i>Alnus hirsuta</i>    | JN043795 |
| Eudicotyledons | Betulaceae     | <i>Alnus</i>    | <i>Alnus japonica</i>   | AY211458 |
| Eudicotyledons | Betulaceae     | <i>Alnus</i>    | <i>Alnus japonica</i>   | FJ844522 |
| Eudicotyledons | Betulaceae     | <i>Alnus</i>    | <i>Alnus japonica</i>   | FJ844555 |
| Eudicotyledons | Betulaceae     | <i>Alnus</i>    | <i>Alnus japonica</i>   | FJ844556 |
| Eudicotyledons | Betulaceae     | <i>Alnus</i>    | <i>Alnus japonica</i>   | FJ844557 |

|                |              |                |                             |          |
|----------------|--------------|----------------|-----------------------------|----------|
| Eudicotyledons | Betulaceae   | <i>Alnus</i>   | <i>Alnus japonica</i>       | FJ844558 |
| Eudicotyledons | Betulaceae   | <i>Alnus</i>   | <i>Alnus japonica</i>       | FJ844559 |
| Eudicotyledons | Betulaceae   | <i>Alnus</i>   | <i>Alnus japonica</i>       | FJ844560 |
| Eudicotyledons | Betulaceae   | <i>Alnus</i>   | <i>Alnus japonica</i>       | JN043796 |
| Eudicotyledons | Betulaceae   | <i>Alnus</i>   | <i>Alnus japonica</i>       | JN043797 |
| Eudicotyledons | Betulaceae   | <i>Alnus</i>   | <i>Alnus japonica</i>       | JN043798 |
| Eudicotyledons | Betulaceae   | <i>Alnus</i>   | <i>Alnus japonica</i>       | JN043799 |
| Eudicotyledons | Betulaceae   | <i>Alnus</i>   | <i>Alnus japonica</i>       | JN043800 |
| Eudicotyledons | Betulaceae   | <i>Alnus</i>   | <i>Alnus japonica</i>       | JN043801 |
| Eudicotyledons | Betulaceae   | <i>Alnus</i>   | <i>Alnus japonica</i>       | JN043802 |
| Eudicotyledons | Betulaceae   | <i>Alnus</i>   | <i>Alnus japonica</i>       | JN043803 |
| Eudicotyledons | Betulaceae   | <i>Alnus</i>   | <i>Alnus japonica</i>       | JN043804 |
| Eudicotyledons | Betulaceae   | <i>Alnus</i>   | <i>Alnus matsumurae</i>     | FJ844518 |
| Eudicotyledons | Betulaceae   | <i>Alnus</i>   | <i>Alnus matsumurae</i>     | FJ844519 |
| Eudicotyledons | Betulaceae   | <i>Alnus</i>   | <i>Alnus nepalensis</i>     | FJ011871 |
| Eudicotyledons | Betulaceae   | <i>Alnus</i>   | <i>Alnus nepalensis</i>     | FJ011872 |
| Eudicotyledons | Betulaceae   | <i>Alnus</i>   | <i>Alnus nepalensis</i>     | FJ844511 |
| Eudicotyledons | Betulaceae   | <i>Alnus</i>   | <i>Alnus nepalensis</i>     | FJ844512 |
| Eudicotyledons | Betulaceae   | <i>Alnus</i>   | <i>Alnus nepalensis</i>     | FJ844513 |
| Eudicotyledons | Betulaceae   | <i>Alnus</i>   | <i>Alnus nepalensis</i>     | FJ844514 |
| Eudicotyledons | Betulaceae   | <i>Alnus</i>   | <i>Alnus nepalensis</i>     | FJ844515 |
| Eudicotyledons | Betulaceae   | <i>Alnus</i>   | <i>Alnus nepalensis</i>     | JN043807 |
| Eudicotyledons | Betulaceae   | <i>Alnus</i>   | <i>Alnus pendula</i>        | FJ844489 |
| Eudicotyledons | Betulaceae   | <i>Alnus</i>   | <i>Alnus pendula</i>        | FJ844490 |
| Eudicotyledons | Betulaceae   | <i>Alnus</i>   | <i>Alnus pendula</i>        | FJ844491 |
| Eudicotyledons | Betulaceae   | <i>Alnus</i>   | <i>Alnus pendula</i>        | FJ844492 |
| Eudicotyledons | Betulaceae   | <i>Alnus</i>   | <i>Alnus rhombifolia</i>    | JN043808 |
| Eudicotyledons | Betulaceae   | <i>Alnus</i>   | <i>Alnus rhombifolia</i>    | JN043809 |
| Eudicotyledons | Betulaceae   | <i>Alnus</i>   | <i>Alnus rubra</i>          | FJ844562 |
| Eudicotyledons | Betulaceae   | <i>Alnus</i>   | <i>Alnus rubra</i>          | FJ844563 |
| Eudicotyledons | Betulaceae   | <i>Alnus</i>   | <i>Alnus rubra</i>          | JN043810 |
| Eudicotyledons | Betulaceae   | <i>Alnus</i>   | <i>Alnus subcordata</i>     | FJ844540 |
| Eudicotyledons | Betulaceae   | <i>Alnus</i>   | <i>Alnus subcordata</i>     | FJ844541 |
| Eudicotyledons | Betulaceae   | <i>Alnus</i>   | <i>Alnus nitida</i>         | FJ844508 |
| Eudicotyledons | Betulaceae   | <i>Alnus</i>   | <i>Alnus nitida</i>         | FJ844509 |
| Eudicotyledons | Betulaceae   | <i>Alnus</i>   | <i>Alnus nitida</i>         | FJ844510 |
| Eudicotyledons | Crassulaceae | <i>Aeonium</i> | <i>Aeonium balsamiferum</i> | AY082192 |
| Eudicotyledons | Crassulaceae | <i>Aeonium</i> | <i>Aeonium balsamiferum</i> | AY082202 |
| Eudicotyledons | Solanaceae   | <i>Lycium</i>  | <i>Lycium americanum</i>    | FJ189606 |
| Eudicotyledons | Solanaceae   | <i>Lycium</i>  | <i>Lycium americanum</i>    | EU742440 |
| Eudicotyledons | Solanaceae   | <i>Lycium</i>  | <i>Lycium americanum</i>    | HQ216167 |
| Eudicotyledons | Solanaceae   | <i>Lycium</i>  | <i>Lycium barbarum</i>      | HM195003 |
| Eudicotyledons | Solanaceae   | <i>Lycium</i>  | <i>Lycium barbarum</i>      | HM195004 |
| Eudicotyledons | Solanaceae   | <i>Lycium</i>  | <i>Lycium barbarum</i>      | JN045282 |
| Eudicotyledons | Solanaceae   | <i>Lycium</i>  | <i>Lycium barbarum</i>      | JN045283 |
| Eudicotyledons | Solanaceae   | <i>Lycium</i>  | <i>Lycium pallidum</i>      | JF284435 |
| Eudicotyledons | Solanaceae   | <i>Lycium</i>  | <i>Lycium pallidum</i>      | JF284436 |
| Eudicotyledons | Solanaceae   | <i>Lycium</i>  | <i>Lycium ruthenicum</i>    | HM195011 |
| Eudicotyledons | Solanaceae   | <i>Lycium</i>  | <i>Lycium ruthenicum</i>    | HM195012 |
| Eudicotyledons | Solanaceae   | <i>Lycium</i>  | <i>Lycium ruthenicum</i>    | JN045288 |
| Eudicotyledons | Solanaceae   | <i>Lycium</i>  | <i>Lycium ruthenicum</i>    | JN045289 |
| Eudicotyledons | Solanaceae   | <i>Lycium</i>  | <i>Lycium ruthenicum</i>    | JN045290 |
| Eudicotyledons | Solanaceae   | <i>Lycium</i>  | <i>Lycium villosum</i>      | HM195017 |

|                |               |                   |                                 |          |
|----------------|---------------|-------------------|---------------------------------|----------|
| Eudicotyledons | Solanaceae    | <i>Lycium</i>     | <i>Lycium villosum</i>          | FJ189626 |
| Eudicotyledons | Solanaceae    | <i>Lycium</i>     | <i>Lycium chinense</i>          | HM195006 |
| Eudicotyledons | Solanaceae    | <i>Lycium</i>     | <i>Lycium chinense</i>          | HM195007 |
| Eudicotyledons | Solanaceae    | <i>Lycium</i>     | <i>Lycium chinense</i>          | GQ435281 |
| Eudicotyledons | Solanaceae    | <i>Lycium</i>     | <i>Lycium chinense</i>          | JN045284 |
| Eudicotyledons | Solanaceae    | <i>Lycium</i>     | <i>Lycium chinense</i>          | JN045285 |
| Eudicotyledons | Solanaceae    | <i>Lycium</i>     | <i>Lycium chinense</i>          | JN045286 |
| Eudicotyledons | Solanaceae    | <i>Lycium</i>     | <i>Lycium chinense</i>          | JN045287 |
| Eudicotyledons | Solanaceae    | <i>Lycium</i>     | <i>Lycium chinense</i>          | HQ216168 |
| Eudicotyledons | Fagaceae      | <i>Fagus</i>      | <i>Fagus hayatae</i>            | JN044497 |
| Eudicotyledons | Fagaceae      | <i>Fagus</i>      | <i>Fagus hayatae</i>            | JN044498 |
| Eudicotyledons | Fagaceae      | <i>Fagus</i>      | <i>Fagus hayatae</i>            | JN044499 |
| Eudicotyledons | Fagaceae      | <i>Fagus</i>      | <i>Fagus hayatae</i>            | JN044500 |
| Eudicotyledons | Verbenaceae   | <i>Verbena</i>    | <i>Verbena urticifolia</i>      | HQ596882 |
| Eudicotyledons | Verbenaceae   | <i>Verbena</i>    | <i>Verbena urticifolia</i>      | DQ006231 |
| Eudicotyledons | Rosaceae      | <i>Crataegus</i>  | <i>Crataegus monogyna</i>       | EF127128 |
| Eudicotyledons | Rosaceae      | <i>Crataegus</i>  | <i>Crataegus monogyna</i>       | JQ390769 |
| Eudicotyledons | Rosaceae      | <i>Crataegus</i>  | <i>Crataegus monogyna</i>       | FJ395483 |
| Eudicotyledons | Rosaceae      | <i>Crataegus</i>  | <i>Crataegus monogyna</i>       | EU500288 |
| Eudicotyledons | Rosaceae      | <i>Crataegus</i>  | <i>Crataegus monogyna</i>       | FJ493304 |
| Eudicotyledons | Rosaceae      | <i>Photinia</i>   | <i>Photinia serratifolia</i>    | HQ427050 |
| Eudicotyledons | Rosaceae      | <i>Photinia</i>   | <i>Photinia serratifolia</i>    | GQ305350 |
| Eudicotyledons | Rosaceae      | <i>Sorbaria</i>   | <i>Sorbaria sorbifolia</i>      | GQ435278 |
| Eudicotyledons | Rosaceae      | <i>Sorbaria</i>   | <i>Sorbaria sorbifolia</i>      | JN047240 |
| Eudicotyledons | Rosaceae      | <i>Sorbaria</i>   | <i>Sorbaria sorbifolia</i>      | JN047241 |
| Eudicotyledons | Apocynaceae   | <i>Asclepias</i>  | <i>Asclepias tuberosa</i>       | GQ248251 |
| Eudicotyledons | Apocynaceae   | <i>Asclepias</i>  | <i>Asclepias tuberosa</i>       | EF590674 |
| Eudicotyledons | Ranunculaceae | <i>Ranunculus</i> | <i>Ranunculus crithmifolius</i> | FJ744168 |
| Eudicotyledons | Ranunculaceae | <i>Ranunculus</i> | <i>Ranunculus crithmifolius</i> | FJ744169 |
| Eudicotyledons | Ranunculaceae | <i>Ranunculus</i> | <i>Ranunculus crithmifolius</i> | FJ744170 |
| Eudicotyledons | Ranunculaceae | <i>Ranunculus</i> | <i>Ranunculus insignis</i>      | FJ744174 |
| Eudicotyledons | Ranunculaceae | <i>Ranunculus</i> | <i>Ranunculus insignis</i>      | FJ744175 |
| Eudicotyledons | Ranunculaceae | <i>Ranunculus</i> | <i>Ranunculus insignis</i>      | FJ744176 |
| Eudicotyledons | Ranunculaceae | <i>Ranunculus</i> | <i>Ranunculus lyallii</i>       | FJ744177 |
| Eudicotyledons | Ranunculaceae | <i>Ranunculus</i> | <i>Ranunculus lyallii</i>       | FJ744178 |
| Eudicotyledons | Ranunculaceae | <i>Ranunculus</i> | <i>Ranunculus lyallii</i>       | FJ744179 |
| Eudicotyledons | Ranunculaceae | <i>Ranunculus</i> | <i>Ranunculus sericophyllus</i> | FJ744180 |
| Eudicotyledons | Ranunculaceae | <i>Ranunculus</i> | <i>Ranunculus sericophyllus</i> | FJ744181 |
| Eudicotyledons | Hydrangeaceae | <i>Hydrangea</i>  | <i>Hydrangea anomala</i>        | JN044919 |
| Eudicotyledons | Hydrangeaceae | <i>Hydrangea</i>  | <i>Hydrangea anomala</i>        | JN044920 |
| Eudicotyledons | Hydrangeaceae | <i>Hydrangea</i>  | <i>Hydrangea anomala</i>        | JN044921 |
| Eudicotyledons | Hydrangeaceae | <i>Hydrangea</i>  | <i>Hydrangea anomala</i>        | HM216965 |
| Eudicotyledons | Hydrangeaceae | <i>Hydrangea</i>  | <i>Hydrangea peruviana</i>      | HM216985 |
| Eudicotyledons | Hydrangeaceae | <i>Hydrangea</i>  | <i>Hydrangea peruviana</i>      | JF321260 |
| Eudicotyledons | Brassicaceae  | <i>Lepidium</i>   | <i>Lepidium perfoliatum</i>     | JN045142 |
| Eudicotyledons | Brassicaceae  | <i>Lepidium</i>   | <i>Lepidium perfoliatum</i>     | JN045143 |
| Eudicotyledons | Brassicaceae  | <i>Lepidium</i>   | <i>Lepidium perfoliatum</i>     | JN045144 |
| Eudicotyledons | Brassicaceae  | <i>Lepidium</i>   | <i>Lepidium ruderae</i>         | JN045145 |
| Eudicotyledons | Brassicaceae  | <i>Lepidium</i>   | <i>Lepidium ruderae</i>         | JN045146 |
| Eudicotyledons | Brassicaceae  | <i>Lepidium</i>   | <i>Lepidium ruderae</i>         | JN045147 |
| Eudicotyledons | Brassicaceae  | <i>Lepidium</i>   | <i>Lepidium ruderae</i>         | JN045148 |
| Eudicotyledons | Brassicaceae  | <i>Lepidium</i>   | <i>Lepidium apetalum</i>        | GQ435334 |
| Eudicotyledons | Brassicaceae  | <i>Lepidium</i>   | <i>Lepidium apetalum</i>        | JN045126 |

|                |              |                 |                          |          |
|----------------|--------------|-----------------|--------------------------|----------|
| Eudicotyledons | Brassicaceae | <i>Lepidium</i> | <i>Lepidium apetalum</i> | JN045127 |
| Eudicotyledons | Brassicaceae | <i>Lepidium</i> | <i>Lepidium apetalum</i> | JN045128 |
| Eudicotyledons | Brassicaceae | <i>Lepidium</i> | <i>Lepidium apetalum</i> | JN045129 |
| Eudicotyledons | Brassicaceae | <i>Lepidium</i> | <i>Lepidium apetalum</i> | JN045130 |
| Eudicotyledons | Brassicaceae | <i>Lepidium</i> | <i>Lepidium apetalum</i> | JN045131 |
| Eudicotyledons | Brassicaceae | <i>Lepidium</i> | <i>Lepidium apetalum</i> | JN045132 |
| Eudicotyledons | Brassicaceae | <i>Lepidium</i> | <i>Lepidium apetalum</i> | JN045133 |
| Eudicotyledons | Brassicaceae | <i>Lepidium</i> | <i>Lepidium apetalum</i> | JN045134 |
| Eudicotyledons | Brassicaceae | <i>Lepidium</i> | <i>Lepidium apetalum</i> | JN045135 |
| Eudicotyledons | Brassicaceae | <i>Lepidium</i> | <i>Lepidium apetalum</i> | JN045136 |
| Eudicotyledons | Brassicaceae | <i>Lepidium</i> | <i>Lepidium apetalum</i> | JN045137 |
| Eudicotyledons | Brassicaceae | <i>Lepidium</i> | <i>Lepidium apetalum</i> | JN045138 |
| Eudicotyledons | Brassicaceae | <i>Lepidium</i> | <i>Lepidium apetalum</i> | JN045139 |
| Eudicotyledons | Brassicaceae | <i>Lepidium</i> | <i>Lepidium apetalum</i> | JN045140 |
| Eudicotyledons | Brassicaceae | <i>Lepidium</i> | <i>Lepidium apetalum</i> | JN045141 |
| Eudicotyledons | Solanaceae   | <i>Lycium</i>   | <i>Lycium shawii</i>     | HM195013 |
| Eudicotyledons | Solanaceae   | <i>Lycium</i>   | <i>Lycium shawii</i>     | HM195014 |
| Eudicotyledons | Asteraceae   | <i>Cota</i>     | <i>Cota triumfettii</i>  | AB683351 |
| Eudicotyledons | Asteraceae   | <i>Cota</i>     | <i>Cota triumfettii</i>  | FR689781 |
| Eudicotyledons | Asteraceae   | <i>Cota</i>     | <i>Cota triumfettii</i>  | FR689789 |
| Eudicotyledons | Asteraceae   | <i>Cota</i>     | <i>Cota triumfettii</i>  | FR689804 |
| Eudicotyledons | Fabaceae     | <i>Schotia</i>  | <i>Schotia afra</i>      | GQ405086 |
| Eudicotyledons | Fabaceae     | <i>Schotia</i>  | <i>Schotia afra</i>      | GQ405087 |
| Eudicotyledons | Fabaceae     | <i>Schotia</i>  | <i>Schotia afra</i>      | GQ405088 |
| Eudicotyledons | Fabaceae     | <i>Schotia</i>  | <i>Schotia afra</i>      | GQ405089 |
| Eudicotyledons | Fabaceae     | <i>Schotia</i>  | <i>Schotia afra</i>      | GQ405090 |
| Eudicotyledons | Fabaceae     | <i>Schotia</i>  | <i>Schotia afra</i>      | GQ405094 |
| Eudicotyledons | Fabaceae     | <i>Schotia</i>  | <i>Schotia afra</i>      | GQ405095 |
| Eudicotyledons | Fabaceae     | <i>Schotia</i>  | <i>Schotia afra</i>      | GQ405097 |
| Eudicotyledons | Fabaceae     | <i>Schotia</i>  | <i>Schotia afra</i>      | GQ405099 |
| Eudicotyledons | Fabaceae     | <i>Schotia</i>  | <i>Schotia afra</i>      | GQ405100 |
| Eudicotyledons | Fabaceae     | <i>Schotia</i>  | <i>Schotia afra</i>      | GQ405101 |
| Eudicotyledons | Fabaceae     | <i>Schotia</i>  | <i>Schotia afra</i>      | GQ405105 |
| Eudicotyledons | Fabaceae     | <i>Schotia</i>  | <i>Schotia afra</i>      | GQ405106 |
| Eudicotyledons | Fabaceae     | <i>Schotia</i>  | <i>Schotia afra</i>      | GQ405107 |
| Eudicotyledons | Fabaceae     | <i>Schotia</i>  | <i>Schotia afra</i>      | GQ405110 |
| Eudicotyledons | Fabaceae     | <i>Schotia</i>  | <i>Schotia afra</i>      | GQ405113 |
| Eudicotyledons | Fabaceae     | <i>Schotia</i>  | <i>Schotia afra</i>      | GQ405114 |
| Eudicotyledons | Fabaceae     | <i>Schotia</i>  | <i>Schotia afra</i>      | GQ405115 |
| Eudicotyledons | Fabaceae     | <i>Schotia</i>  | <i>Schotia afra</i>      | GQ405123 |
| Eudicotyledons | Fabaceae     | <i>Schotia</i>  | <i>Schotia afra</i>      | GQ405124 |
| Eudicotyledons | Fabaceae     | <i>Schotia</i>  | <i>Schotia afra</i>      | GQ405127 |
| Eudicotyledons | Fabaceae     | <i>Schotia</i>  | <i>Schotia afra</i>      | GQ405128 |
| Eudicotyledons | Fabaceae     | <i>Schotia</i>  | <i>Schotia afra</i>      | GQ405129 |
| Eudicotyledons | Fabaceae     | <i>Schotia</i>  | <i>Schotia latifolia</i> | GQ405091 |
| Eudicotyledons | Fabaceae     | <i>Schotia</i>  | <i>Schotia latifolia</i> | GQ405093 |
| Eudicotyledons | Fabaceae     | <i>Schotia</i>  | <i>Schotia latifolia</i> | GQ405096 |
| Eudicotyledons | Fabaceae     | <i>Schotia</i>  | <i>Schotia latifolia</i> | GQ405102 |
| Eudicotyledons | Fabaceae     | <i>Schotia</i>  | <i>Schotia latifolia</i> | GQ405111 |
| Eudicotyledons | Fabaceae     | <i>Schotia</i>  | <i>Schotia latifolia</i> | GQ405112 |
| Eudicotyledons | Fabaceae     | <i>Schotia</i>  | <i>Schotia latifolia</i> | GQ405116 |
| Eudicotyledons | Fabaceae     | <i>Schotia</i>  | <i>Schotia latifolia</i> | GQ405118 |
| Eudicotyledons | Fabaceae     | <i>Schotia</i>  | <i>Schotia latifolia</i> | GQ405119 |



|                |               |                    |                               |          |
|----------------|---------------|--------------------|-------------------------------|----------|
| Eudicotyledons | Fabaceae      | <i>Schotia</i>     | <i>Schotia latifolia</i>      | GQ405120 |
| Eudicotyledons | Fabaceae      | <i>Schotia</i>     | <i>Schotia latifolia</i>      | GQ405126 |
| Eudicotyledons | Fagaceae      | <i>Fagus</i>       | <i>Fagus engleriana</i>       | JN044492 |
| Eudicotyledons | Fagaceae      | <i>Fagus</i>       | <i>Fagus engleriana</i>       | JN044493 |
| Eudicotyledons | Fagaceae      | <i>Fagus</i>       | <i>Fagus engleriana</i>       | JN044494 |
| Eudicotyledons | Fagaceae      | <i>Fagus</i>       | <i>Fagus engleriana</i>       | JN044495 |
| Eudicotyledons | Fagaceae      | <i>Fagus</i>       | <i>Fagus engleriana</i>       | JN044496 |
| Eudicotyledons | Fagaceae      | <i>Fagus</i>       | <i>Fagus lucida</i>           | JN044504 |
| Eudicotyledons | Fagaceae      | <i>Fagus</i>       | <i>Fagus lucida</i>           | JN044505 |
| Eudicotyledons | Fagaceae      | <i>Fagus</i>       | <i>Fagus lucida</i>           | JN044506 |
| Eudicotyledons | Fagaceae      | <i>Fagus</i>       | <i>Fagus lucida</i>           | JN044507 |
| Eudicotyledons | Fagaceae      | <i>Fagus</i>       | <i>Fagus lucida</i>           | JN044508 |
| Eudicotyledons | Fagaceae      | <i>Fagus</i>       | <i>Fagus longipetiolata</i>   | JN044501 |
| Eudicotyledons | Fagaceae      | <i>Fagus</i>       | <i>Fagus longipetiolata</i>   | JN044502 |
| Eudicotyledons | Fagaceae      | <i>Fagus</i>       | <i>Fagus longipetiolata</i>   | JN044503 |
| Eudicotyledons | Ranunculaceae | <i>Anemone</i>     | <i>Anemone virginiana</i>     | HQ596597 |
| Eudicotyledons | Ranunculaceae | <i>Anemone</i>     | <i>Anemone virginiana</i>     | DQ006220 |
| Eudicotyledons | Rutaceae      | <i>Citrus</i>      | <i>Citrus medica</i>          | GQ435453 |
| Eudicotyledons | Rutaceae      | <i>Citrus</i>      | <i>Citrus medica</i>          | GQ435454 |
| Eudicotyledons | Rosaceae      | <i>Rubus</i>       | <i>Rubus parvifolius</i>      | GQ435257 |
| Eudicotyledons | Rosaceae      | <i>Rubus</i>       | <i>Rubus parvifolius</i>      | JN407048 |
| Eudicotyledons | Rosaceae      | <i>Rubus</i>       | <i>Rubus parvifolius</i>      | JN407049 |
| Eudicotyledons | Lamiaceae     | <i>Salvia</i>      | <i>Salvia splendens</i>       | JQ339257 |
| Eudicotyledons | Lamiaceae     | <i>Salvia</i>      | <i>Salvia splendens</i>       | FJ513111 |
| Eudicotyledons | Moraceae      | <i>Ficus</i>       | <i>Ficus benjamina</i>        | GU935092 |
| Eudicotyledons | Moraceae      | <i>Ficus</i>       | <i>Ficus benjamina</i>        | GU935093 |
| Eudicotyledons | Moraceae      | <i>Ficus</i>       | <i>Ficus benjamina</i>        | FN675798 |
| Eudicotyledons | Moraceae      | <i>Ficus</i>       | <i>Ficus benjamina</i>        | JN044511 |
| Eudicotyledons | Moraceae      | <i>Ficus</i>       | <i>Ficus benjamina</i>        | JN044512 |
| Eudicotyledons | Moraceae      | <i>Ficus</i>       | <i>Ficus glumosa</i>          | EU213822 |
| Eudicotyledons | Moraceae      | <i>Ficus</i>       | <i>Ficus glumosa</i>          | EU213823 |
| Eudicotyledons | Moraceae      | <i>Ficus</i>       | <i>Ficus glumosa</i>          | EU213824 |
| Eudicotyledons | Moraceae      | <i>Ficus</i>       | <i>Ficus sycomorus</i>        | EU213825 |
| Eudicotyledons | Moraceae      | <i>Ficus</i>       | <i>Ficus sycomorus</i>        | EU213826 |
| Eudicotyledons | Moraceae      | <i>Ficus</i>       | <i>Ficus sycomorus</i>        | EU213827 |
| Eudicotyledons | Lamiaceae     | <i>Clinopodium</i> | <i>Clinopodium coccineum</i>  | DQ667344 |
| Eudicotyledons | Lamiaceae     | <i>Clinopodium</i> | <i>Clinopodium coccineum</i>  | AY943555 |
| Eudicotyledons | Lamiaceae     | <i>Conradina</i>   | <i>Conradina etonia</i>       | AY943539 |
| Eudicotyledons | Lamiaceae     | <i>Conradina</i>   | <i>Conradina etonia</i>       | AY943540 |
| Eudicotyledons | Asteraceae    | <i>Encelia</i>     | <i>Encelia californica</i>    | DQ383890 |
| Eudicotyledons | Asteraceae    | <i>Encelia</i>     | <i>Encelia californica</i>    | AY215539 |
| Eudicotyledons | Asteraceae    | <i>Melampodium</i> | <i>Melampodium leucanthum</i> | AY215575 |
| Eudicotyledons | Asteraceae    | <i>Melampodium</i> | <i>Melampodium leucanthum</i> | FJ846087 |
| Eudicotyledons | Asteraceae    | <i>Melampodium</i> | <i>Melampodium leucanthum</i> | FJ846088 |
| Eudicotyledons | Asteraceae    | <i>Melampodium</i> | <i>Melampodium leucanthum</i> | FJ846089 |
| Eudicotyledons | Asteraceae    | <i>Melampodium</i> | <i>Melampodium leucanthum</i> | FJ846090 |
| Eudicotyledons | Asteraceae    | <i>Melampodium</i> | <i>Melampodium leucanthum</i> | FJ846091 |
| Eudicotyledons | Asteraceae    | <i>Melampodium</i> | <i>Melampodium leucanthum</i> | FJ846092 |
| Eudicotyledons | Asteraceae    | <i>Melampodium</i> | <i>Melampodium leucanthum</i> | FJ846093 |
| Eudicotyledons | Asteraceae    | <i>Melampodium</i> | <i>Melampodium leucanthum</i> | FJ846094 |
| Eudicotyledons | Asteraceae    | <i>Melampodium</i> | <i>Melampodium leucanthum</i> | FJ846095 |
| Eudicotyledons | Asteraceae    | <i>Melampodium</i> | <i>Melampodium leucanthum</i> | FJ846096 |
| Eudicotyledons | Asteraceae    | <i>Melampodium</i> | <i>Melampodium leucanthum</i> | FJ846097 |









|                |               |                   |                            |          |
|----------------|---------------|-------------------|----------------------------|----------|
| Eudicotyledons | Hydrangeaceae | <i>Hydrangea</i>  | <i>Hydrangea aspera</i>    | JN044923 |
| Eudicotyledons | Hydrangeaceae | <i>Hydrangea</i>  | <i>Hydrangea aspera</i>    | HM216967 |
| Eudicotyledons | Rubiaceae     | <i>Psychotria</i> | <i>Psychotria grandis</i>  | GQ982341 |
| Eudicotyledons | Rubiaceae     | <i>Psychotria</i> | <i>Psychotria grandis</i>  | HM446992 |
| Eudicotyledons | Asteraceae    | <i>Senecio</i>    | <i>Senecio scandens</i>    | GQ435114 |
| Eudicotyledons | Asteraceae    | <i>Senecio</i>    | <i>Senecio scandens</i>    | GQ435115 |
| Eudicotyledons | Asteraceae    | <i>Senecio</i>    | <i>Senecio scandens</i>    | GQ435116 |
| Eudicotyledons | Asteraceae    | <i>Senecio</i>    | <i>Senecio scandens</i>    | GQ435117 |
| Eudicotyledons | Asteraceae    | <i>Senecio</i>    | <i>Senecio scandens</i>    | GQ435118 |
| Eudicotyledons | Asteraceae    | <i>Senecio</i>    | <i>Senecio scandens</i>    | EF538048 |
| Eudicotyledons | Lamiaceae     | <i>Mentha</i>     | <i>Mentha aquatica</i>     | FR726099 |
| Eudicotyledons | Lamiaceae     | <i>Mentha</i>     | <i>Mentha aquatica</i>     | FR726100 |
| Eudicotyledons | Lamiaceae     | <i>Mentha</i>     | <i>Mentha aquatica</i>     | AY643656 |
| Eudicotyledons | Lamiaceae     | <i>Mentha</i>     | <i>Mentha aquatica</i>     | AY643657 |
| Eudicotyledons | Lamiaceae     | <i>Mentha</i>     | <i>Mentha aquatica</i>     | AY643658 |
| Eudicotyledons | Lamiaceae     | <i>Mentha</i>     | <i>Mentha aquatica</i>     | AY643659 |
| Eudicotyledons | Lamiaceae     | <i>Mentha</i>     | <i>Mentha aquatica</i>     | AY643660 |
| Eudicotyledons | Lamiaceae     | <i>Mentha</i>     | <i>Mentha aquatica</i>     | AY643661 |
| Eudicotyledons | Lamiaceae     | <i>Mentha</i>     | <i>Mentha aquatica</i>     | AY643662 |
| Eudicotyledons | Asteraceae    | <i>Encelia</i>    | <i>Encelia farinosa</i>    | DQ661036 |
| Eudicotyledons | Asteraceae    | <i>Encelia</i>    | <i>Encelia farinosa</i>    | DQ661037 |
| Eudicotyledons | Asteraceae    | <i>Encelia</i>    | <i>Encelia farinosa</i>    | DQ661038 |
| Eudicotyledons | Asteraceae    | <i>Encelia</i>    | <i>Encelia farinosa</i>    | DQ661039 |
| Eudicotyledons | Asteraceae    | <i>Encelia</i>    | <i>Encelia farinosa</i>    | DQ661040 |
| Eudicotyledons | Asteraceae    | <i>Encelia</i>    | <i>Encelia farinosa</i>    | DQ661041 |
| Eudicotyledons | Asteraceae    | <i>Encelia</i>    | <i>Encelia farinosa</i>    | DQ661042 |
| Eudicotyledons | Asteraceae    | <i>Encelia</i>    | <i>Encelia ventorum</i>    | DQ383906 |
| Eudicotyledons | Asteraceae    | <i>Encelia</i>    | <i>Encelia ventorum</i>    | DQ383907 |
| Eudicotyledons | Rosaceae      | <i>Aronia</i>     | <i>Aronia prunifolia</i>   | JQ390629 |
| Eudicotyledons | Rosaceae      | <i>Aronia</i>     | <i>Aronia prunifolia</i>   | GQ305338 |
| Eudicotyledons | Moraceae      | <i>Brosimum</i>   | <i>Brosimum alicastrum</i> | GQ436998 |
| Eudicotyledons | Moraceae      | <i>Brosimum</i>   | <i>Brosimum alicastrum</i> | GQ436999 |
| Eudicotyledons | Moraceae      | <i>Brosimum</i>   | <i>Brosimum alicastrum</i> | GQ437000 |
| Eudicotyledons | Moraceae      | <i>Brosimum</i>   | <i>Brosimum alicastrum</i> | GQ437001 |
| Eudicotyledons | Moraceae      | <i>Brosimum</i>   | <i>Brosimum alicastrum</i> | GQ437002 |
| Eudicotyledons | Moraceae      | <i>Brosimum</i>   | <i>Brosimum alicastrum</i> | GQ437003 |
| Eudicotyledons | Moraceae      | <i>Brosimum</i>   | <i>Brosimum alicastrum</i> | GQ437004 |
| Eudicotyledons | Moraceae      | <i>Brosimum</i>   | <i>Brosimum alicastrum</i> | GQ437005 |
| Eudicotyledons | Moraceae      | <i>Brosimum</i>   | <i>Brosimum alicastrum</i> | GQ437006 |
| Eudicotyledons | Moraceae      | <i>Brosimum</i>   | <i>Brosimum alicastrum</i> | GQ437007 |
| Eudicotyledons | Moraceae      | <i>Brosimum</i>   | <i>Brosimum alicastrum</i> | GQ437008 |
| Eudicotyledons | Moraceae      | <i>Brosimum</i>   | <i>Brosimum alicastrum</i> | GQ437009 |
| Eudicotyledons | Moraceae      | <i>Brosimum</i>   | <i>Brosimum alicastrum</i> | GQ437010 |
| Eudicotyledons | Moraceae      | <i>Brosimum</i>   | <i>Brosimum alicastrum</i> | GQ437011 |
| Eudicotyledons | Moraceae      | <i>Brosimum</i>   | <i>Brosimum alicastrum</i> | GQ437012 |
| Eudicotyledons | Moraceae      | <i>Brosimum</i>   | <i>Brosimum alicastrum</i> | GQ437013 |
| Eudicotyledons | Moraceae      | <i>Brosimum</i>   | <i>Brosimum alicastrum</i> | GQ437014 |
| Eudicotyledons | Moraceae      | <i>Brosimum</i>   | <i>Brosimum alicastrum</i> | GQ437015 |
| Eudicotyledons | Moraceae      | <i>Brosimum</i>   | <i>Brosimum alicastrum</i> | GQ437016 |
| Eudicotyledons | Moraceae      | <i>Brosimum</i>   | <i>Brosimum alicastrum</i> | GQ437017 |
| Eudicotyledons | Moraceae      | <i>Brosimum</i>   | <i>Brosimum alicastrum</i> | GQ437018 |
| Eudicotyledons | Moraceae      | <i>Brosimum</i>   | <i>Brosimum alicastrum</i> | GQ437019 |
| Eudicotyledons | Moraceae      | <i>Brosimum</i>   | <i>Brosimum alicastrum</i> | GQ437020 |









|                |              |                  |                            |          |
|----------------|--------------|------------------|----------------------------|----------|
| Eudicotyledons | Moraceae     | <i>Brosimum</i>  | <i>Brosimum alicastrum</i> | GQ437180 |
| Eudicotyledons | Moraceae     | <i>Brosimum</i>  | <i>Brosimum alicastrum</i> | GQ437181 |
| Eudicotyledons | Moraceae     | <i>Brosimum</i>  | <i>Brosimum alicastrum</i> | GQ437182 |
| Eudicotyledons | Moraceae     | <i>Brosimum</i>  | <i>Brosimum alicastrum</i> | GQ437183 |
| Eudicotyledons | Moraceae     | <i>Brosimum</i>  | <i>Brosimum alicastrum</i> | GQ437184 |
| Eudicotyledons | Moraceae     | <i>Brosimum</i>  | <i>Brosimum alicastrum</i> | GQ437185 |
| Eudicotyledons | Moraceae     | <i>Brosimum</i>  | <i>Brosimum alicastrum</i> | GQ437186 |
| Eudicotyledons | Moraceae     | <i>Brosimum</i>  | <i>Brosimum alicastrum</i> | GQ437187 |
| Eudicotyledons | Moraceae     | <i>Brosimum</i>  | <i>Brosimum alicastrum</i> | GQ437188 |
| Eudicotyledons | Moraceae     | <i>Brosimum</i>  | <i>Brosimum alicastrum</i> | GQ437189 |
| Eudicotyledons | Moraceae     | <i>Brosimum</i>  | <i>Brosimum alicastrum</i> | GQ437190 |
| Eudicotyledons | Moraceae     | <i>Brosimum</i>  | <i>Brosimum alicastrum</i> | GQ437191 |
| Eudicotyledons | Moraceae     | <i>Brosimum</i>  | <i>Brosimum alicastrum</i> | GQ437192 |
| Eudicotyledons | Moraceae     | <i>Brosimum</i>  | <i>Brosimum alicastrum</i> | GQ437193 |
| Eudicotyledons | Moraceae     | <i>Brosimum</i>  | <i>Brosimum alicastrum</i> | GQ437194 |
| Eudicotyledons | Moraceae     | <i>Brosimum</i>  | <i>Brosimum alicastrum</i> | GQ437195 |
| Eudicotyledons | Moraceae     | <i>Brosimum</i>  | <i>Brosimum alicastrum</i> | GQ437196 |
| Eudicotyledons | Moraceae     | <i>Brosimum</i>  | <i>Brosimum alicastrum</i> | GQ437197 |
| Eudicotyledons | Moraceae     | <i>Brosimum</i>  | <i>Brosimum alicastrum</i> | GQ437198 |
| Eudicotyledons | Moraceae     | <i>Brosimum</i>  | <i>Brosimum alicastrum</i> | GQ437199 |
| Eudicotyledons | Moraceae     | <i>Brosimum</i>  | <i>Brosimum alicastrum</i> | GQ437200 |
| Eudicotyledons | Moraceae     | <i>Brosimum</i>  | <i>Brosimum alicastrum</i> | GQ437201 |
| Eudicotyledons | Moraceae     | <i>Brosimum</i>  | <i>Brosimum alicastrum</i> | GQ437202 |
| Eudicotyledons | Moraceae     | <i>Brosimum</i>  | <i>Brosimum alicastrum</i> | GQ437203 |
| Eudicotyledons | Moraceae     | <i>Brosimum</i>  | <i>Brosimum alicastrum</i> | GQ437204 |
| Eudicotyledons | Moraceae     | <i>Brosimum</i>  | <i>Brosimum alicastrum</i> | GQ437205 |
| Eudicotyledons | Moraceae     | <i>Brosimum</i>  | <i>Brosimum alicastrum</i> | GQ437206 |
| Eudicotyledons | Moraceae     | <i>Brosimum</i>  | <i>Brosimum alicastrum</i> | GQ982162 |
| Eudicotyledons | Tamaricaceae | <i>Myricaria</i> | <i>Myricaria elegans</i>   | EF394293 |
| Eudicotyledons | Tamaricaceae | <i>Myricaria</i> | <i>Myricaria elegans</i>   | EF394294 |
| Eudicotyledons | Tamaricaceae | <i>Myricaria</i> | <i>Myricaria squamosa</i>  | EU240617 |
| Eudicotyledons | Tamaricaceae | <i>Myricaria</i> | <i>Myricaria squamosa</i>  | EF394264 |
| Eudicotyledons | Tamaricaceae | <i>Myricaria</i> | <i>Myricaria squamosa</i>  | EF394265 |
| Eudicotyledons | Tamaricaceae | <i>Myricaria</i> | <i>Myricaria squamosa</i>  | EF394266 |
| Eudicotyledons | Tamaricaceae | <i>Myricaria</i> | <i>Myricaria squamosa</i>  | EF394267 |
| Eudicotyledons | Tamaricaceae | <i>Myricaria</i> | <i>Myricaria bracteata</i> | EU240615 |
| Eudicotyledons | Tamaricaceae | <i>Myricaria</i> | <i>Myricaria bracteata</i> | EF394268 |
| Eudicotyledons | Tamaricaceae | <i>Myricaria</i> | <i>Myricaria bracteata</i> | EF394269 |
| Eudicotyledons | Tamaricaceae | <i>Myricaria</i> | <i>Myricaria bracteata</i> | EF394270 |
| Eudicotyledons | Tamaricaceae | <i>Myricaria</i> | <i>Myricaria bracteata</i> | EF394271 |
| Eudicotyledons | Tamaricaceae | <i>Myricaria</i> | <i>Myricaria bracteata</i> | EF394272 |
| Eudicotyledons | Tamaricaceae | <i>Myricaria</i> | <i>Myricaria bracteata</i> | EF394273 |
| Eudicotyledons | Apocynaceae  | <i>Hoodia</i>    | <i>Hoodia gordonii</i>     | FJ026605 |
| Eudicotyledons | Apocynaceae  | <i>Hoodia</i>    | <i>Hoodia gordonii</i>     | FJ026606 |
| Eudicotyledons | Apocynaceae  | <i>Hoodia</i>    | <i>Hoodia gordonii</i>     | FJ026607 |
| Eudicotyledons | Apocynaceae  | <i>Hoodia</i>    | <i>Hoodia gordonii</i>     | JN117261 |
| Eudicotyledons | Apocynaceae  | <i>Hoodia</i>    | <i>Hoodia gordonii</i>     | JN117262 |
| Eudicotyledons | Apocynaceae  | <i>Hoodia</i>    | <i>Hoodia gordonii</i>     | JN117263 |
| Eudicotyledons | Meliaceae    | <i>Carapa</i>    | <i>Carapa guianensis</i>   | JN122312 |
| Eudicotyledons | Meliaceae    | <i>Carapa</i>    | <i>Carapa guianensis</i>   | JN122313 |
| Eudicotyledons | Meliaceae    | <i>Carapa</i>    | <i>Carapa guianensis</i>   | JN122314 |
| Eudicotyledons | Meliaceae    | <i>Carapa</i>    | <i>Carapa guianensis</i>   | JN122315 |
| Eudicotyledons | Meliaceae    | <i>Carapa</i>    | <i>Carapa guianensis</i>   | JN122316 |

|                |              |                    |                               |          |
|----------------|--------------|--------------------|-------------------------------|----------|
| Eudicotyledons | Meliaceae    | <i>Carapa</i>      | <i>Carapa guianensis</i>      | JN122317 |
| Eudicotyledons | Meliaceae    | <i>Carapa</i>      | <i>Carapa guianensis</i>      | JN122318 |
| Eudicotyledons | Meliaceae    | <i>Carapa</i>      | <i>Carapa guianensis</i>      | JN122319 |
| Eudicotyledons | Meliaceae    | <i>Carapa</i>      | <i>Carapa guianensis</i>      | JN122320 |
| Eudicotyledons | Crassulaceae | <i>Rhodiola</i>    | <i>Rhodiola bupleuroides</i>  | JN046719 |
| Eudicotyledons | Crassulaceae | <i>Rhodiola</i>    | <i>Rhodiola bupleuroides</i>  | JN046720 |
| Eudicotyledons | Crassulaceae | <i>Rhodiola</i>    | <i>Rhodiola sacra</i>         | JN046729 |
| Eudicotyledons | Crassulaceae | <i>Rhodiola</i>    | <i>Rhodiola sacra</i>         | JN046730 |
| Eudicotyledons | Crassulaceae | <i>Rhodiola</i>    | <i>Rhodiola dumulosa</i>      | FJ794333 |
| Eudicotyledons | Crassulaceae | <i>Rhodiola</i>    | <i>Rhodiola dumulosa</i>      | FJ794334 |
| Eudicotyledons | Crassulaceae | <i>Rhodiola</i>    | <i>Rhodiola dumulosa</i>      | FJ794335 |
| Eudicotyledons | Crassulaceae | <i>Rhodiola</i>    | <i>Rhodiola dumulosa</i>      | FJ794336 |
| Eudicotyledons | Crassulaceae | <i>Rhodiola</i>    | <i>Rhodiola dumulosa</i>      | FJ794337 |
| Eudicotyledons | Crassulaceae | <i>Rhodiola</i>    | <i>Rhodiola dumulosa</i>      | FJ794338 |
| Eudicotyledons | Crassulaceae | <i>Rhodiola</i>    | <i>Rhodiola dumulosa</i>      | FJ794339 |
| Eudicotyledons | Crassulaceae | <i>Rhodiola</i>    | <i>Rhodiola dumulosa</i>      | FJ794340 |
| Eudicotyledons | Crassulaceae | <i>Rhodiola</i>    | <i>Rhodiola dumulosa</i>      | FJ794341 |
| Eudicotyledons | Crassulaceae | <i>Rhodiola</i>    | <i>Rhodiola dumulosa</i>      | FJ794342 |
| Eudicotyledons | Crassulaceae | <i>Rhodiola</i>    | <i>Rhodiola dumulosa</i>      | FJ794343 |
| Eudicotyledons | Crassulaceae | <i>Rhodiola</i>    | <i>Rhodiola dumulosa</i>      | FJ794344 |
| Eudicotyledons | Crassulaceae | <i>Rhodiola</i>    | <i>Rhodiola fastigiata</i>    | JN046723 |
| Eudicotyledons | Crassulaceae | <i>Rhodiola</i>    | <i>Rhodiola fastigiata</i>    | JN046724 |
| Eudicotyledons | Crassulaceae | <i>Rhodiola</i>    | <i>Rhodiola fastigiata</i>    | JN046725 |
| Eudicotyledons | Crassulaceae | <i>Rhodiola</i>    | <i>Rhodiola kirilowii</i>     | FJ974030 |
| Eudicotyledons | Crassulaceae | <i>Rhodiola</i>    | <i>Rhodiola kirilowii</i>     | JN046726 |
| Eudicotyledons | Crassulaceae | <i>Rhodiola</i>    | <i>Rhodiola kirilowii</i>     | JN046727 |
| Eudicotyledons | Crassulaceae | <i>Rhodiola</i>    | <i>Rhodiola kirilowii</i>     | JN046728 |
| Eudicotyledons | Lamiaceae    | <i>Isodon</i>      | <i>Isodon lophanthoides</i>   | JN045037 |
| Eudicotyledons | Lamiaceae    | <i>Isodon</i>      | <i>Isodon lophanthoides</i>   | JN045038 |
| Eudicotyledons | Lamiaceae    | <i>Clinopodium</i> | <i>Clinopodium vulgare</i>    | DQ667409 |
| Eudicotyledons | Lamiaceae    | <i>Clinopodium</i> | <i>Clinopodium vulgare</i>    | HQ596649 |
| Eudicotyledons | Rosaceae     | <i>Potentilla</i>  | <i>Potentilla chinensis</i>   | GQ435272 |
| Eudicotyledons | Rosaceae     | <i>Potentilla</i>  | <i>Potentilla chinensis</i>   | GQ435273 |
| Eudicotyledons | Gesneriaceae | <i>Glossoloma</i>  | <i>Glossoloma grandicalyx</i> | DQ006189 |
| Eudicotyledons | Gesneriaceae | <i>Glossoloma</i>  | <i>Glossoloma grandicalyx</i> | DQ211205 |
| Eudicotyledons | Papaveraceae | <i>Papaver</i>     | <i>Papaver bracteatum</i>     | JN584661 |
| Eudicotyledons | Papaveraceae | <i>Papaver</i>     | <i>Papaver bracteatum</i>     | EF590720 |
| Eudicotyledons | Malvaceae    | <i>Tarasa</i>      | <i>Tarasa albertii</i>        | AY184309 |
| Eudicotyledons | Malvaceae    | <i>Tarasa</i>      | <i>Tarasa albertii</i>        | AY232638 |
| Eudicotyledons | Malvaceae    | <i>Tarasa</i>      | <i>Tarasa antofagastana</i>   | AY184310 |
| Eudicotyledons | Malvaceae    | <i>Tarasa</i>      | <i>Tarasa antofagastana</i>   | AY184311 |
| Eudicotyledons | Malvaceae    | <i>Tarasa</i>      | <i>Tarasa antofagastana</i>   | AY184312 |
| Eudicotyledons | Malvaceae    | <i>Tarasa</i>      | <i>Tarasa humilis</i>         | AY184320 |
| Eudicotyledons | Malvaceae    | <i>Tarasa</i>      | <i>Tarasa humilis</i>         | AY232640 |
| Eudicotyledons | Malvaceae    | <i>Tarasa</i>      | <i>Tarasa operculata</i>      | AY184326 |
| Eudicotyledons | Malvaceae    | <i>Tarasa</i>      | <i>Tarasa operculata</i>      | AY232642 |
| Eudicotyledons | Malvaceae    | <i>Tarasa</i>      | <i>Tarasa tenella</i>         | AY184330 |
| Eudicotyledons | Malvaceae    | <i>Tarasa</i>      | <i>Tarasa tenella</i>         | AY232643 |
| Eudicotyledons | Malvaceae    | <i>Tarasa</i>      | <i>Tarasa thyrsoides</i>      | AY184332 |
| Eudicotyledons | Malvaceae    | <i>Tarasa</i>      | <i>Tarasa thyrsoides</i>      | AY232644 |
| Eudicotyledons | Tamaricaceae | <i>Myricaria</i>   | <i>Myricaria laxiflora</i>    | EU240620 |
| Eudicotyledons | Tamaricaceae | <i>Myricaria</i>   | <i>Myricaria laxiflora</i>    | EF394254 |
| Eudicotyledons | Tamaricaceae | <i>Myricaria</i>   | <i>Myricaria laxiflora</i>    | EF394255 |

|                |                |                    |                                   |          |
|----------------|----------------|--------------------|-----------------------------------|----------|
| Eudicotyledons | Tamaricaceae   | <i>Myricaria</i>   | <i>Myricaria laxiflora</i>        | EF394256 |
| Eudicotyledons | Tamaricaceae   | <i>Myricaria</i>   | <i>Myricaria laxiflora</i>        | EF394257 |
| Eudicotyledons | Lamiaceae      | <i>Clinopodium</i> | <i>Clinopodium alpinum</i>        | HQ902815 |
| Eudicotyledons | Lamiaceae      | <i>Clinopodium</i> | <i>Clinopodium alpinum</i>        | HQ902850 |
| Eudicotyledons | Lamiaceae      | <i>Salvia</i>      | <i>Salvia miltiorrhiza</i>        | JQ339249 |
| Eudicotyledons | Lamiaceae      | <i>Salvia</i>      | <i>Salvia miltiorrhiza</i>        | DQ667379 |
| Eudicotyledons | Lamiaceae      | <i>Salvia</i>      | <i>Salvia miltiorrhiza</i>        | DQ667419 |
| Eudicotyledons | Lamiaceae      | <i>Salvia</i>      | <i>Salvia miltiorrhiza</i>        | EU590856 |
| Eudicotyledons | Lamiaceae      | <i>Salvia</i>      | <i>Salvia miltiorrhiza</i>        | FJ513086 |
| Eudicotyledons | Lamiaceae      | <i>Salvia</i>      | <i>Salvia miltiorrhiza</i>        | FJ513087 |
| Eudicotyledons | Loranthaceae   | <i>Macrosolen</i>  | <i>Macrosolen cochinchinensis</i> | HQ317809 |
| Eudicotyledons | Loranthaceae   | <i>Macrosolen</i>  | <i>Macrosolen cochinchinensis</i> | HQ317810 |
| Eudicotyledons | Loranthaceae   | <i>Macrosolen</i>  | <i>Macrosolen cochinchinensis</i> | HQ317811 |
| Eudicotyledons | Loranthaceae   | <i>Macrosolen</i>  | <i>Macrosolen cochinchinensis</i> | JN687575 |
| Eudicotyledons | Loranthaceae   | <i>Scurrula</i>    | <i>Scurrula chingii</i>           | HQ317814 |
| Eudicotyledons | Loranthaceae   | <i>Scurrula</i>    | <i>Scurrula chingii</i>           | HQ317815 |
| Eudicotyledons | Loranthaceae   | <i>Scurrula</i>    | <i>Scurrula parasitica</i>        | HQ317816 |
| Eudicotyledons | Loranthaceae   | <i>Scurrula</i>    | <i>Scurrula parasitica</i>        | HQ317817 |
| Eudicotyledons | Loranthaceae   | <i>Scurrula</i>    | <i>Scurrula parasitica</i>        | HQ317818 |
| Eudicotyledons | Loranthaceae   | <i>Taxillus</i>    | <i>Taxillus chinensis</i>         | HQ317821 |
| Eudicotyledons | Loranthaceae   | <i>Taxillus</i>    | <i>Taxillus chinensis</i>         | HQ317822 |
| Eudicotyledons | Loranthaceae   | <i>Taxillus</i>    | <i>Taxillus chinensis</i>         | HQ317823 |
| Eudicotyledons | Loranthaceae   | <i>Taxillus</i>    | <i>Taxillus chinensis</i>         | HQ317824 |
| Eudicotyledons | Loranthaceae   | <i>Taxillus</i>    | <i>Taxillus chinensis</i>         | HQ317825 |
| Eudicotyledons | Loranthaceae   | <i>Taxillus</i>    | <i>Taxillus chinensis</i>         | HQ317826 |
| Eudicotyledons | Loranthaceae   | <i>Taxillus</i>    | <i>Taxillus chinensis</i>         | HQ317827 |
| Eudicotyledons | Loranthaceae   | <i>Taxillus</i>    | <i>Taxillus chinensis</i>         | HQ317828 |
| Eudicotyledons | Loranthaceae   | <i>Taxillus</i>    | <i>Taxillus chinensis</i>         | HQ317829 |
| Eudicotyledons | Loranthaceae   | <i>Taxillus</i>    | <i>Taxillus chinensis</i>         | HQ317830 |
| Eudicotyledons | Loranthaceae   | <i>Taxillus</i>    | <i>Taxillus chinensis</i>         | HQ317831 |
| Eudicotyledons | Loranthaceae   | <i>Taxillus</i>    | <i>Taxillus chinensis</i>         | GQ435467 |
| Eudicotyledons | Loranthaceae   | <i>Taxillus</i>    | <i>Taxillus sutchuenensis</i>     | HQ317837 |
| Eudicotyledons | Loranthaceae   | <i>Taxillus</i>    | <i>Taxillus sutchuenensis</i>     | HQ317838 |
| Eudicotyledons | Sapotaceae     | <i>Micropholis</i> | <i>Micropholis egensis</i>        | DQ344115 |
| Eudicotyledons | Sapotaceae     | <i>Micropholis</i> | <i>Micropholis egensis</i>        | GQ428709 |
| Eudicotyledons | Sapotaceae     | <i>Micropholis</i> | <i>Micropholis guyanensis</i>     | DQ344116 |
| Eudicotyledons | Sapotaceae     | <i>Micropholis</i> | <i>Micropholis guyanensis</i>     | FJ039064 |
| Eudicotyledons | Sapotaceae     | <i>Micropholis</i> | <i>Micropholis guyanensis</i>     | FJ039065 |
| Eudicotyledons | Sapotaceae     | <i>Micropholis</i> | <i>Micropholis guyanensis</i>     | HM446966 |
| Eudicotyledons | Sapotaceae     | <i>Micropholis</i> | <i>Micropholis venulosa</i>       | DQ344117 |
| Eudicotyledons | Sapotaceae     | <i>Micropholis</i> | <i>Micropholis venulosa</i>       | FJ039067 |
| Eudicotyledons | Sapotaceae     | <i>Micropholis</i> | <i>Micropholis venulosa</i>       | FJ039068 |
| Eudicotyledons | Moraceae       | <i>Brosimum</i>    | <i>Brosimum guianense</i>         | FJ039011 |
| Eudicotyledons | Moraceae       | <i>Brosimum</i>    | <i>Brosimum guianense</i>         | GQ982163 |
| Eudicotyledons | Caprifoliaceae | <i>Valeriana</i>   | <i>Valeriana urticifolia</i>      | AY794303 |
| Eudicotyledons | Caprifoliaceae | <i>Valeriana</i>   | <i>Valeriana urticifolia</i>      | AY794304 |
| Eudicotyledons | Crassulaceae   | <i>Rhodiola</i>    | <i>Rhodiola crenulata</i>         | GQ435061 |
| Eudicotyledons | Crassulaceae   | <i>Rhodiola</i>    | <i>Rhodiola crenulata</i>         | JN046721 |
| Eudicotyledons | Crassulaceae   | <i>Rhodiola</i>    | <i>Rhodiola crenulata</i>         | JN046722 |
| Eudicotyledons | Betulaceae     | <i>Alnus</i>       | <i>Alnus cremastogyne</i>         | FJ844498 |
| Eudicotyledons | Betulaceae     | <i>Alnus</i>       | <i>Alnus cremastogyne</i>         | FJ844499 |
| Eudicotyledons | Betulaceae     | <i>Alnus</i>       | <i>Alnus cremastogyne</i>         | FJ844500 |
| Eudicotyledons | Betulaceae     | <i>Alnus</i>       | <i>Alnus cremastogyne</i>         | FJ844501 |

|                |               |                    |                                  |          |
|----------------|---------------|--------------------|----------------------------------|----------|
| Eudicotyledons | Betulaceae    | <i>Alnus</i>       | <i>Alnus cremastogyne</i>        | FJ844502 |
| Eudicotyledons | Betulaceae    | <i>Alnus</i>       | <i>Alnus cremastogyne</i>        | FJ844503 |
| Eudicotyledons | Betulaceae    | <i>Alnus</i>       | <i>Alnus cremastogyne</i>        | JN043787 |
| Eudicotyledons | Betulaceae    | <i>Alnus</i>       | <i>Alnus cremastogyne</i>        | JN043788 |
| Eudicotyledons | Betulaceae    | <i>Alnus</i>       | <i>Alnus cremastogyne</i>        | JN043789 |
| Eudicotyledons | Betulaceae    | <i>Alnus</i>       | <i>Alnus cremastogyne</i>        | JN043790 |
| Eudicotyledons | Betulaceae    | <i>Alnus</i>       | <i>Alnus cremastogyne</i>        | JN043791 |
| Eudicotyledons | Betulaceae    | <i>Alnus</i>       | <i>Alnus ferdinandi-coburgii</i> | FJ844504 |
| Eudicotyledons | Betulaceae    | <i>Alnus</i>       | <i>Alnus ferdinandi-coburgii</i> | FJ844505 |
| Eudicotyledons | Betulaceae    | <i>Alnus</i>       | <i>Alnus ferdinandi-coburgii</i> | FJ844506 |
| Eudicotyledons | Betulaceae    | <i>Alnus</i>       | <i>Alnus ferdinandi-coburgii</i> | FJ844507 |
| Eudicotyledons | Betulaceae    | <i>Alnus</i>       | <i>Alnus mandshurica</i>         | JN043805 |
| Eudicotyledons | Betulaceae    | <i>Alnus</i>       | <i>Alnus mandshurica</i>         | JN043806 |
| Eudicotyledons | Betulaceae    | <i>Alnus</i>       | <i>Alnus orientalis</i>          | FJ844551 |
| Eudicotyledons | Betulaceae    | <i>Alnus</i>       | <i>Alnus orientalis</i>          | FJ844552 |
| Eudicotyledons | Betulaceae    | <i>Alnus</i>       | <i>Alnus serrulata</i>           | FJ844566 |
| Eudicotyledons | Betulaceae    | <i>Alnus</i>       | <i>Alnus serrulata</i>           | FJ844567 |
| Eudicotyledons | Betulaceae    | <i>Alnus</i>       | <i>Alnus trabeculosa</i>         | FJ844547 |
| Eudicotyledons | Betulaceae    | <i>Alnus</i>       | <i>Alnus trabeculosa</i>         | FJ844548 |
| Eudicotyledons | Betulaceae    | <i>Alnus</i>       | <i>Alnus trabeculosa</i>         | FJ844549 |
| Eudicotyledons | Betulaceae    | <i>Alnus</i>       | <i>Alnus trabeculosa</i>         | FJ844550 |
| Eudicotyledons | Betulaceae    | <i>Alnus</i>       | <i>Alnus trabeculosa</i>         | JN043814 |
| Eudicotyledons | Betulaceae    | <i>Betula</i>      | <i>Betula davurica</i>           | FJ011874 |
| Eudicotyledons | Betulaceae    | <i>Betula</i>      | <i>Betula davurica</i>           | FJ011875 |
| Eudicotyledons | Betulaceae    | <i>Betula</i>      | <i>Betula davurica</i>           | FJ011876 |
| Eudicotyledons | Betulaceae    | <i>Betula</i>      | <i>Betula davurica</i>           | FJ011877 |
| Eudicotyledons | Rubiaceae     | <i>Galium</i>      | <i>Galium mollugo</i>            | FJ395515 |
| Eudicotyledons | Rubiaceae     | <i>Galium</i>      | <i>Galium mollugo</i>            | HQ596710 |
| Eudicotyledons | Malvaceae     | <i>Cristaria</i>   | <i>Cristaria aspera</i>          | AY371674 |
| Eudicotyledons | Malvaceae     | <i>Cristaria</i>   | <i>Cristaria aspera</i>          | AY371685 |
| Eudicotyledons | Malvaceae     | <i>Cristaria</i>   | <i>Cristaria multifida</i>       | AY371681 |
| Eudicotyledons | Malvaceae     | <i>Cristaria</i>   | <i>Cristaria multifida</i>       | AY371684 |
| Eudicotyledons | Berberidaceae | <i>Berberis</i>    | <i>Berberis insignis</i>         | GU934951 |
| Eudicotyledons | Berberidaceae | <i>Berberis</i>    | <i>Berberis insignis</i>         | GU934952 |
| Eudicotyledons | Myrtaceae     | <i>Syzygium</i>    | <i>Syzygium cumini</i>           | GU135329 |
| Eudicotyledons | Myrtaceae     | <i>Syzygium</i>    | <i>Syzygium cumini</i>           | GU135395 |
| Eudicotyledons | Lamiaceae     | <i>Clinopodium</i> | <i>Clinopodium ashei</i>         | DQ667348 |
| Eudicotyledons | Lamiaceae     | <i>Clinopodium</i> | <i>Clinopodium ashei</i>         | AY943551 |
| Eudicotyledons | Lamiaceae     | <i>Clinopodium</i> | <i>Clinopodium ashei</i>         | AY943552 |
| Eudicotyledons | Lamiaceae     | <i>Clinopodium</i> | <i>Clinopodium ashei</i>         | AY943553 |
| Eudicotyledons | Lamiaceae     | <i>Clinopodium</i> | <i>Clinopodium ashei</i>         | AY943554 |
| Eudicotyledons | Ranunculaceae | <i>Coptis</i>      | <i>Coptis quinquefolia</i>       | AB159523 |
| Eudicotyledons | Ranunculaceae | <i>Coptis</i>      | <i>Coptis quinquefolia</i>       | AB159526 |
| Eudicotyledons | Ranunculaceae | <i>Coptis</i>      | <i>Coptis teeta</i>              | JN862875 |
| Eudicotyledons | Ranunculaceae | <i>Coptis</i>      | <i>Coptis teeta</i>              | JN862876 |
| Eudicotyledons | Ranunculaceae | <i>Coptis</i>      | <i>Coptis teeta</i>              | JN862877 |
| Eudicotyledons | Ranunculaceae | <i>Coptis</i>      | <i>Coptis teeta</i>              | AB163743 |
| Eudicotyledons | Ranunculaceae | <i>Coptis</i>      | <i>Coptis teeta</i>              | HQ829539 |
| Eudicotyledons | Ranunculaceae | <i>Coptis</i>      | <i>Coptis teeta</i>              | HQ829540 |
| Eudicotyledons | Ranunculaceae | <i>Coptis</i>      | <i>Coptis teeta</i>              | HQ829541 |
| Eudicotyledons | Ranunculaceae | <i>Coptis</i>      | <i>Coptis teeta</i>              | HQ829542 |
| Eudicotyledons | Ranunculaceae | <i>Coptis</i>      | <i>Coptis deltoidea</i>          | GQ435210 |
| Eudicotyledons | Ranunculaceae | <i>Coptis</i>      | <i>Coptis deltoidea</i>          | GQ435211 |

|                |                 |                  |                             |          |
|----------------|-----------------|------------------|-----------------------------|----------|
| Eudicotyledons | Ranunculaceae   | <i>Coptis</i>    | <i>Coptis deltoidea</i>     | GQ435212 |
| Eudicotyledons | Ranunculaceae   | <i>Coptis</i>    | <i>Coptis deltoidea</i>     | JN862873 |
| Eudicotyledons | Ranunculaceae   | <i>Coptis</i>    | <i>Coptis deltoidea</i>     | AB163744 |
| Eudicotyledons | Ranunculaceae   | <i>Coptis</i>    | <i>Coptis deltoidea</i>     | HQ829531 |
| Eudicotyledons | Ranunculaceae   | <i>Coptis</i>    | <i>Coptis deltoidea</i>     | HQ829532 |
| Eudicotyledons | Ranunculaceae   | <i>Coptis</i>    | <i>Coptis deltoidea</i>     | HQ829533 |
| Eudicotyledons | Ranunculaceae   | <i>Coptis</i>    | <i>Coptis deltoidea</i>     | HQ829534 |
| Eudicotyledons | Ranunculaceae   | <i>Coptis</i>    | <i>Coptis deltoidea</i>     | HQ829535 |
| Eudicotyledons | Ranunculaceae   | <i>Coptis</i>    | <i>Coptis chinensis</i>     | GQ435206 |
| Eudicotyledons | Ranunculaceae   | <i>Coptis</i>    | <i>Coptis chinensis</i>     | GQ435207 |
| Eudicotyledons | Ranunculaceae   | <i>Coptis</i>    | <i>Coptis chinensis</i>     | JN862866 |
| Eudicotyledons | Ranunculaceae   | <i>Coptis</i>    | <i>Coptis chinensis</i>     | JN862867 |
| Eudicotyledons | Ranunculaceae   | <i>Coptis</i>    | <i>Coptis chinensis</i>     | JN862868 |
| Eudicotyledons | Ranunculaceae   | <i>Coptis</i>    | <i>Coptis chinensis</i>     | JN862869 |
| Eudicotyledons | Ranunculaceae   | <i>Coptis</i>    | <i>Coptis chinensis</i>     | JN862870 |
| Eudicotyledons | Ranunculaceae   | <i>Coptis</i>    | <i>Coptis chinensis</i>     | JN862872 |
| Eudicotyledons | Ranunculaceae   | <i>Coptis</i>    | <i>Coptis chinensis</i>     | AB163745 |
| Eudicotyledons | Ranunculaceae   | <i>Coptis</i>    | <i>Coptis chinensis</i>     | HQ829527 |
| Eudicotyledons | Ranunculaceae   | <i>Coptis</i>    | <i>Coptis chinensis</i>     | HQ829528 |
| Eudicotyledons | Ranunculaceae   | <i>Coptis</i>    | <i>Coptis chinensis</i>     | HQ829529 |
| Eudicotyledons | Ranunculaceae   | <i>Coptis</i>    | <i>Coptis omeiensis</i>     | JN862874 |
| Eudicotyledons | Ranunculaceae   | <i>Coptis</i>    | <i>Coptis omeiensis</i>     | AB163746 |
| Eudicotyledons | Ranunculaceae   | <i>Coptis</i>    | <i>Coptis omeiensis</i>     | HQ829536 |
| Eudicotyledons | Ranunculaceae   | <i>Coptis</i>    | <i>Coptis omeiensis</i>     | HQ829537 |
| Eudicotyledons | Ranunculaceae   | <i>Coptis</i>    | <i>Coptis omeiensis</i>     | HQ829538 |
| Eudicotyledons | Melastomataceae | <i>Miconia</i>   | <i>Miconia impatiolaris</i> | GQ982289 |
| Eudicotyledons | Melastomataceae | <i>Miconia</i>   | <i>Miconia impatiolaris</i> | HM446959 |
| Eudicotyledons | Lamiaceae       | <i>Salvia</i>    | <i>Salvia digitaloides</i>  | DQ667363 |
| Eudicotyledons | Lamiaceae       | <i>Salvia</i>    | <i>Salvia digitaloides</i>  | FJ513124 |
| Eudicotyledons | Lamiaceae       | <i>Salvia</i>    | <i>Salvia fruticosa</i>     | EU627579 |
| Eudicotyledons | Lamiaceae       | <i>Salvia</i>    | <i>Salvia fruticosa</i>     | FJ513109 |
| Eudicotyledons | Lamiaceae       | <i>Salvia</i>    | <i>Salvia fruticosa</i>     | HQ902840 |
| Eudicotyledons | Lamiaceae       | <i>Salvia</i>    | <i>Salvia fruticosa</i>     | HQ902859 |
| Eudicotyledons | Lamiaceae       | <i>Salvia</i>    | <i>Salvia greatae</i>       | DQ667339 |
| Eudicotyledons | Lamiaceae       | <i>Salvia</i>    | <i>Salvia greatae</i>       | HQ418921 |
| Eudicotyledons | Tamaricaceae    | <i>Myricaria</i> | <i>Myricaria germanica</i>  | EU914131 |
| Eudicotyledons | Tamaricaceae    | <i>Myricaria</i> | <i>Myricaria germanica</i>  | EU914132 |
| Eudicotyledons | Tamaricaceae    | <i>Myricaria</i> | <i>Myricaria germanica</i>  | HQ680684 |
| Eudicotyledons | Tamaricaceae    | <i>Myricaria</i> | <i>Myricaria germanica</i>  | HQ680687 |
| Eudicotyledons | Proteaceae      | <i>Faurea</i>    | <i>Faurea rochetiana</i>    | EU213813 |
| Eudicotyledons | Proteaceae      | <i>Faurea</i>    | <i>Faurea rochetiana</i>    | EU213814 |
| Eudicotyledons | Proteaceae      | <i>Faurea</i>    | <i>Faurea rochetiana</i>    | EU213815 |
| Eudicotyledons | Proteaceae      | <i>Faurea</i>    | <i>Faurea saligna</i>       | EU213816 |
| Eudicotyledons | Proteaceae      | <i>Faurea</i>    | <i>Faurea saligna</i>       | EU213817 |
| Eudicotyledons | Proteaceae      | <i>Faurea</i>    | <i>Faurea saligna</i>       | EU213818 |
| Eudicotyledons | Malvaceae       | <i>Palaua</i>    | <i>Palaua rhombifolia</i>   | DQ826559 |
| Eudicotyledons | Malvaceae       | <i>Palaua</i>    | <i>Palaua rhombifolia</i>   | DQ156321 |
| Eudicotyledons | Malvaceae       | <i>Palaua</i>    | <i>Palaua rhombifolia</i>   | DQ156326 |
| Eudicotyledons | Lamiaceae       | <i>Mentha</i>    | <i>Mentha arvensis</i>      | DQ667410 |
| Eudicotyledons | Lamiaceae       | <i>Mentha</i>    | <i>Mentha arvensis</i>      | HQ596770 |
| Eudicotyledons | Lamiaceae       | <i>Mentha</i>    | <i>Mentha arvensis</i>      | AY643665 |
| Eudicotyledons | Gentianaceae    | <i>Gentiana</i>  | <i>Gentiana scabra</i>      | GQ864027 |
| Eudicotyledons | Gentianaceae    | <i>Gentiana</i>  | <i>Gentiana scabra</i>      | GQ864028 |

|                |                |                  |                               |          |
|----------------|----------------|------------------|-------------------------------|----------|
| Eudicotyledons | Lamiaceae      | <i>Mentha</i>    | <i>Mentha canadensis</i>      | GQ434942 |
| Eudicotyledons | Lamiaceae      | <i>Mentha</i>    | <i>Mentha canadensis</i>      | JN406990 |
| Eudicotyledons | Lamiaceae      | <i>Mentha</i>    | <i>Mentha canadensis</i>      | JN406991 |
| Eudicotyledons | Lamiaceae      | <i>Mentha</i>    | <i>Mentha canadensis</i>      | JN406992 |
| Eudicotyledons | Lamiaceae      | <i>Mentha</i>    | <i>Mentha canadensis</i>      | JN406993 |
| Eudicotyledons | Lamiaceae      | <i>Mentha</i>    | <i>Mentha canadensis</i>      | AY643663 |
| Eudicotyledons | Lamiaceae      | <i>Mentha</i>    | <i>Mentha canadensis</i>      | AY643664 |
| Eudicotyledons | Lamiaceae      | <i>Mentha</i>    | <i>Mentha canadensis</i>      | HM590119 |
| Eudicotyledons | Lamiaceae      | <i>Mentha</i>    | <i>Mentha pulegium</i>        | EU627577 |
| Eudicotyledons | Lamiaceae      | <i>Mentha</i>    | <i>Mentha pulegium</i>        | HQ902828 |
| Eudicotyledons | Lamiaceae      | <i>Mentha</i>    | <i>Mentha pulegium</i>        | HQ902869 |
| Eudicotyledons | Rosaceae       | <i>Crataegus</i> | <i>Crataegus laevigata</i>    | EF127130 |
| Eudicotyledons | Rosaceae       | <i>Crataegus</i> | <i>Crataegus laevigata</i>    | EU500297 |
| Eudicotyledons | Anacardiaceae  | <i>Searsia</i>   | <i>Searsia leptodictya</i>    | EU213845 |
| Eudicotyledons | Anacardiaceae  | <i>Searsia</i>   | <i>Searsia leptodictya</i>    | EU213846 |
| Eudicotyledons | Anacardiaceae  | <i>Searsia</i>   | <i>Searsia leptodictya</i>    | EU213847 |
| Eudicotyledons | Caprifoliaceae | <i>Valeriana</i> | <i>Valeriana clematitidis</i> | AY794250 |
| Eudicotyledons | Caprifoliaceae | <i>Valeriana</i> | <i>Valeriana clematitidis</i> | AY794251 |
| Eudicotyledons | Moraceae       | <i>Ficus</i>     | <i>Ficus altissima</i>        | GU135300 |
| Eudicotyledons | Moraceae       | <i>Ficus</i>     | <i>Ficus altissima</i>        | JN044509 |
| Eudicotyledons | Moraceae       | <i>Ficus</i>     | <i>Ficus altissima</i>        | JN044510 |
| Eudicotyledons | Moraceae       | <i>Ficus</i>     | <i>Ficus benghalensis</i>     | GU935087 |
| Eudicotyledons | Moraceae       | <i>Ficus</i>     | <i>Ficus benghalensis</i>     | GU935088 |
| Eudicotyledons | Moraceae       | <i>Ficus</i>     | <i>Ficus benghalensis</i>     | GU935089 |
| Eudicotyledons | Moraceae       | <i>Ficus</i>     | <i>Ficus benghalensis</i>     | GU935090 |
| Eudicotyledons | Moraceae       | <i>Ficus</i>     | <i>Ficus benghalensis</i>     | GU935091 |
| Eudicotyledons | Moraceae       | <i>Ficus</i>     | <i>Ficus citrifolia</i>       | GQ982219 |
| Eudicotyledons | Moraceae       | <i>Ficus</i>     | <i>Ficus citrifolia</i>       | HM446931 |
| Eudicotyledons | Moraceae       | <i>Ficus</i>     | <i>Ficus abutilifolia</i>     | EU213819 |
| Eudicotyledons | Moraceae       | <i>Ficus</i>     | <i>Ficus abutilifolia</i>     | EU213820 |
| Eudicotyledons | Moraceae       | <i>Ficus</i>     | <i>Ficus abutilifolia</i>     | EU213821 |
| Eudicotyledons | Moraceae       | <i>Ficus</i>     | <i>Ficus lyrata</i>           | JN044532 |
| Eudicotyledons | Moraceae       | <i>Ficus</i>     | <i>Ficus lyrata</i>           | JN044533 |
| Eudicotyledons | Moraceae       | <i>Ficus</i>     | <i>Ficus ischnopoda</i>       | JN044529 |
| Eudicotyledons | Moraceae       | <i>Ficus</i>     | <i>Ficus ischnopoda</i>       | JN044530 |
| Eudicotyledons | Moraceae       | <i>Ficus</i>     | <i>Ficus ischnopoda</i>       | JN044531 |
| Eudicotyledons | Moraceae       | <i>Ficus</i>     | <i>Ficus hirta</i>            | HQ415506 |
| Eudicotyledons | Moraceae       | <i>Ficus</i>     | <i>Ficus hirta</i>            | JN044524 |
| Eudicotyledons | Moraceae       | <i>Ficus</i>     | <i>Ficus hirta</i>            | JN044525 |
| Eudicotyledons | Lamiaceae      | <i>Phlomis</i>   | <i>Phlomis lychnitis</i>      | AY792624 |
| Eudicotyledons | Lamiaceae      | <i>Phlomis</i>   | <i>Phlomis lychnitis</i>      | AY792625 |
| Eudicotyledons | Lamiaceae      | <i>Phlomis</i>   | <i>Phlomis lychnitis</i>      | AY792626 |
| Eudicotyledons | Lamiaceae      | <i>Phlomis</i>   | <i>Phlomis lychnitis</i>      | AY792627 |
| Eudicotyledons | Lamiaceae      | <i>Phlomis</i>   | <i>Phlomis lychnitis</i>      | AY792628 |
| Eudicotyledons | Lamiaceae      | <i>Phlomis</i>   | <i>Phlomis lychnitis</i>      | AY792629 |
| Eudicotyledons | Lamiaceae      | <i>Phlomis</i>   | <i>Phlomis lychnitis</i>      | AY792630 |
| Eudicotyledons | Lamiaceae      | <i>Phlomis</i>   | <i>Phlomis lychnitis</i>      | AY792631 |
| Eudicotyledons | Lamiaceae      | <i>Phlomis</i>   | <i>Phlomis lychnitis</i>      | AY792632 |
| Eudicotyledons | Lamiaceae      | <i>Phlomis</i>   | <i>Phlomis lychnitis</i>      | AY792633 |
| Eudicotyledons | Lamiaceae      | <i>Phlomis</i>   | <i>Phlomis lychnitis</i>      | AY792634 |
| Eudicotyledons | Lamiaceae      | <i>Phlomis</i>   | <i>Phlomis lychnitis</i>      | AY792635 |
| Eudicotyledons | Lamiaceae      | <i>Phlomis</i>   | <i>Phlomis lychnitis</i>      | AY792636 |
| Eudicotyledons | Lamiaceae      | <i>Phlomis</i>   | <i>Phlomis lychnitis</i>      | AY792637 |

|                |             |                     |                                         |          |
|----------------|-------------|---------------------|-----------------------------------------|----------|
| Eudicotyledons | Lamiaceae   | <i>Phlomis</i>      | <i>Phlomis lychnitis</i>                | AY792638 |
| Eudicotyledons | Lamiaceae   | <i>Phlomis</i>      | <i>Phlomis lychnitis</i>                | AY792639 |
| Eudicotyledons | Lamiaceae   | <i>Phlomis</i>      | <i>Phlomis lychnitis</i>                | AY792640 |
| Eudicotyledons | Lamiaceae   | <i>Phlomis</i>      | <i>Phlomis lychnitis</i>                | AY792641 |
| Eudicotyledons | Lamiaceae   | <i>Phlomis</i>      | <i>Phlomis lychnitis</i>                | AY792642 |
| Eudicotyledons | Lamiaceae   | <i>Phlomis</i>      | <i>Phlomis lychnitis</i>                | AY792643 |
| Eudicotyledons | Lamiaceae   | <i>Phlomis</i>      | <i>Phlomis lychnitis</i>                | AY792644 |
| Eudicotyledons | Lamiaceae   | <i>Phlomis</i>      | <i>Phlomis lychnitis</i>                | AY792645 |
| Eudicotyledons | Lamiaceae   | <i>Phlomis</i>      | <i>Phlomis lychnitis</i>                | AY792646 |
| Eudicotyledons | Asteraceae  | <i>Elephantopus</i> | <i>Elephantopus mollis</i>              | JN406939 |
| Eudicotyledons | Asteraceae  | <i>Elephantopus</i> | <i>Elephantopus mollis</i>              | JN406940 |
| Eudicotyledons | Asteraceae  | <i>Elephantopus</i> | <i>Elephantopus mollis</i>              | JN406941 |
| Eudicotyledons | Asteraceae  | <i>Elephantopus</i> | <i>Elephantopus mollis</i>              | JN406942 |
| Eudicotyledons | Lamiaceae   | <i>Conradina</i>    | <i>Conradina brevifolia</i>             | AY943531 |
| Eudicotyledons | Lamiaceae   | <i>Conradina</i>    | <i>Conradina brevifolia</i>             | AY943532 |
| Eudicotyledons | Lamiaceae   | <i>Conradina</i>    | <i>Conradina brevifolia</i>             | AY943533 |
| Eudicotyledons | Lamiaceae   | <i>Conradina</i>    | <i>Conradina brevifolia</i>             | AY943534 |
| Eudicotyledons | Lamiaceae   | <i>Conradina</i>    | <i>Conradina brevifolia</i>             | AY943535 |
| Eudicotyledons | Lamiaceae   | <i>Conradina</i>    | <i>Conradina canescens</i>              | DQ667349 |
| Eudicotyledons | Lamiaceae   | <i>Conradina</i>    | <i>Conradina canescens</i>              | AY943536 |
| Eudicotyledons | Lamiaceae   | <i>Conradina</i>    | <i>Conradina canescens</i>              | AY943537 |
| Eudicotyledons | Lamiaceae   | <i>Conradina</i>    | <i>Conradina canescens</i>              | AY943538 |
| Eudicotyledons | Lamiaceae   | <i>Conradina</i>    | <i>Conradina glabra</i>                 | AY943541 |
| Eudicotyledons | Lamiaceae   | <i>Conradina</i>    | <i>Conradina glabra</i>                 | AY943542 |
| Eudicotyledons | Lamiaceae   | <i>Conradina</i>    | <i>Conradina glabra</i>                 | AY943543 |
| Eudicotyledons | Lamiaceae   | <i>Conradina</i>    | <i>Conradina grandiflora</i>            | AY943544 |
| Eudicotyledons | Lamiaceae   | <i>Conradina</i>    | <i>Conradina grandiflora</i>            | AY943545 |
| Eudicotyledons | Lamiaceae   | <i>Conradina</i>    | <i>Conradina grandiflora</i>            | AY943546 |
| Eudicotyledons | Lamiaceae   | <i>Conradina</i>    | <i>Conradina grandiflora</i>            | AY943547 |
| Eudicotyledons | Lamiaceae   | <i>Conradina</i>    | <i>Conradina sp. Edwards et al. 133</i> | AY943548 |
| Eudicotyledons | Lamiaceae   | <i>Conradina</i>    | <i>Conradina sp. Edwards et al. 133</i> | AY943549 |
| Eudicotyledons | Apocynaceae | <i>Asclepias</i>    | <i>Asclepias incarnata</i>              | HQ596607 |
| Eudicotyledons | Apocynaceae | <i>Asclepias</i>    | <i>Asclepias incarnata</i>              | GQ248250 |
| Eudicotyledons | Apocynaceae | <i>Asclepias</i>    | <i>Asclepias incarnata</i>              | EF590673 |
| Eudicotyledons | Apocynaceae | <i>Asclepias</i>    | <i>Asclepias incarnata</i>              | DQ006139 |
| Eudicotyledons | Myrtaceae   | <i>Syzygium</i>     | <i>Syzygium buxifolium</i>              | HQ415488 |
| Eudicotyledons | Myrtaceae   | <i>Syzygium</i>     | <i>Syzygium buxifolium</i>              | HQ427087 |
| Eudicotyledons | Myrtaceae   | <i>Syzygium</i>     | <i>Syzygium buxifolium</i>              | GQ435378 |
| Eudicotyledons | Myrtaceae   | <i>Syzygium</i>     | <i>Syzygium jambos</i>                  | HQ415491 |
| Eudicotyledons | Myrtaceae   | <i>Syzygium</i>     | <i>Syzygium jambos</i>                  | AM489882 |
| Eudicotyledons | Myrtaceae   | <i>Syzygium</i>     | <i>Syzygium jambos</i>                  | GU135387 |
| Eudicotyledons | Myrtaceae   | <i>Syzygium</i>     | <i>Syzygium jambos</i>                  | HM447006 |
| Eudicotyledons | Solanaceae  | <i>Mandragora</i>   | <i>Mandragora caulescens</i>            | HQ216170 |
| Eudicotyledons | Solanaceae  | <i>Mandragora</i>   | <i>Mandragora caulescens</i>            | HQ216171 |
| Eudicotyledons | Lamiaceae   | <i>Salvia</i>       | <i>Salvia przewalskii</i>               | DQ667362 |
| Eudicotyledons | Lamiaceae   | <i>Salvia</i>       | <i>Salvia przewalskii</i>               | GQ435471 |
| Eudicotyledons | Lamiaceae   | <i>Salvia</i>       | <i>Salvia przewalskii</i>               | FJ513125 |
| Eudicotyledons | Malvaceae   | <i>Palaua</i>       | <i>Palaua weberbaueri</i>               | DQ826560 |
| Eudicotyledons | Malvaceae   | <i>Palaua</i>       | <i>Palaua weberbaueri</i>               | DQ156331 |
| Eudicotyledons | Malvaceae   | <i>Palaua</i>       | <i>Palaua mollendoensis</i>             | DQ826558 |
| Eudicotyledons | Malvaceae   | <i>Palaua</i>       | <i>Palaua mollendoensis</i>             | DQ156334 |
| Eudicotyledons | Asteraceae  | <i>Encelia</i>      | <i>Encelia resinifera</i>               | DQ383904 |
| Eudicotyledons | Asteraceae  | <i>Encelia</i>      | <i>Encelia resinifera</i>               | DQ383905 |



|                |               |                     |                               |          |
|----------------|---------------|---------------------|-------------------------------|----------|
| Eudicotyledons | Asteraceae    | <i>Encelia</i>      | <i>Encelia asperifolia</i>    | DQ383888 |
| Eudicotyledons | Asteraceae    | <i>Encelia</i>      | <i>Encelia asperifolia</i>    | DQ383889 |
| Eudicotyledons | Asteraceae    | <i>Encelia</i>      | <i>Encelia laciniata</i>      | DQ383898 |
| Eudicotyledons | Asteraceae    | <i>Encelia</i>      | <i>Encelia laciniata</i>      | DQ383899 |
| Eudicotyledons | Asteraceae    | <i>Encelia</i>      | <i>Encelia palmeri</i>        | DQ383900 |
| Eudicotyledons | Asteraceae    | <i>Encelia</i>      | <i>Encelia palmeri</i>        | DQ383901 |
| Eudicotyledons | Asteraceae    | <i>Encelia</i>      | <i>Encelia palmeri</i>        | DQ383902 |
| Eudicotyledons | Asteraceae    | <i>Enceliopsis</i>  | <i>Enceliopsis nudicaulis</i> | EF133507 |
| Eudicotyledons | Asteraceae    | <i>Enceliopsis</i>  | <i>Enceliopsis nudicaulis</i> | DQ383914 |
| Eudicotyledons | Asteraceae    | <i>Enceliopsis</i>  | <i>Enceliopsis nutans</i>     | DQ383915 |
| Eudicotyledons | Asteraceae    | <i>Enceliopsis</i>  | <i>Enceliopsis nutans</i>     | DQ383916 |
| Eudicotyledons | Moraceae      | <i>Ficus</i>        | <i>Ficus trigona</i>          | GU935114 |
| Eudicotyledons | Moraceae      | <i>Ficus</i>        | <i>Ficus trigona</i>          | GU935115 |
| Eudicotyledons | Loganiaceae   | <i>Strychnos</i>    | <i>Strychnos decussata</i>    | EU213857 |
| Eudicotyledons | Loganiaceae   | <i>Strychnos</i>    | <i>Strychnos decussata</i>    | EU213858 |
| Eudicotyledons | Loganiaceae   | <i>Strychnos</i>    | <i>Strychnos decussata</i>    | EU213859 |
| Eudicotyledons | Cucurbitaceae | <i>Thladiantha</i>  | <i>Thladiantha hookeri</i>    | JN047403 |
| Eudicotyledons | Cucurbitaceae | <i>Thladiantha</i>  | <i>Thladiantha hookeri</i>    | JN047404 |
| Eudicotyledons | Cucurbitaceae | <i>Thladiantha</i>  | <i>Thladiantha hookeri</i>    | JN047405 |
| Eudicotyledons | Cucurbitaceae | <i>Thladiantha</i>  | <i>Thladiantha hookeri</i>    | JN047406 |
| Eudicotyledons | Cucurbitaceae | <i>Thladiantha</i>  | <i>Thladiantha hookeri</i>    | JN047407 |
| Eudicotyledons | Cucurbitaceae | <i>Thladiantha</i>  | <i>Thladiantha davidii</i>    | JN047384 |
| Eudicotyledons | Cucurbitaceae | <i>Thladiantha</i>  | <i>Thladiantha davidii</i>    | JN047385 |
| Eudicotyledons | Cucurbitaceae | <i>Thladiantha</i>  | <i>Thladiantha davidii</i>    | JN047386 |
| Eudicotyledons | Cucurbitaceae | <i>Thladiantha</i>  | <i>Thladiantha davidii</i>    | JN047387 |
| Eudicotyledons | Ranunculaceae | <i>Anemone</i>      | <i>Anemone acutiloba</i>      | HQ596595 |
| Eudicotyledons | Ranunculaceae | <i>Anemone</i>      | <i>Anemone acutiloba</i>      | HQ596596 |
| Eudicotyledons | Ranunculaceae | <i>Anemone</i>      | <i>Anemone raddeana</i>       | EF139280 |
| Eudicotyledons | Ranunculaceae | <i>Anemone</i>      | <i>Anemone raddeana</i>       | EF139281 |
| Eudicotyledons | Ranunculaceae | <i>Anemone</i>      | <i>Anemone raddeana</i>       | EF139282 |
| Eudicotyledons | Ranunculaceae | <i>Anemone</i>      | <i>Anemone raddeana</i>       | EF139283 |
| Eudicotyledons | Ranunculaceae | <i>Anemone</i>      | <i>Anemone raddeana</i>       | EF139284 |
| Eudicotyledons | Ranunculaceae | <i>Anemone</i>      | <i>Anemone raddeana</i>       | EF139285 |
| Eudicotyledons | Ranunculaceae | <i>Anemone</i>      | <i>Anemone raddeana</i>       | EF139286 |
| Eudicotyledons | Ranunculaceae | <i>Anemone</i>      | <i>Anemone raddeana</i>       | EF139287 |
| Eudicotyledons | Ranunculaceae | <i>Anemone</i>      | <i>Anemone raddeana</i>       | EF139288 |
| Eudicotyledons | Lamiaceae     | <i>Salvia</i>       | <i>Salvia cacaliifolia</i>    | DQ667367 |
| Eudicotyledons | Lamiaceae     | <i>Salvia</i>       | <i>Salvia cacaliifolia</i>    | HQ418903 |
| Eudicotyledons | Lamiaceae     | <i>Salvia</i>       | <i>Salvia patens</i>          | DQ667361 |
| Eudicotyledons | Lamiaceae     | <i>Salvia</i>       | <i>Salvia patens</i>          | HQ418937 |
| Eudicotyledons | Lamiaceae     | <i>Salvia</i>       | <i>Salvia prunelloides</i>    | DQ667371 |
| Eudicotyledons | Lamiaceae     | <i>Salvia</i>       | <i>Salvia prunelloides</i>    | HQ418938 |
| Eudicotyledons | Lamiaceae     | <i>Salvia</i>       | <i>Salvia roborowskii</i>     | DQ667384 |
| Eudicotyledons | Lamiaceae     | <i>Salvia</i>       | <i>Salvia roborowskii</i>     | FJ513126 |
| Eudicotyledons | Asteraceae    | <i>Elephantopus</i> | <i>Elephantopus scaber</i>    | GQ435083 |
| Eudicotyledons | Asteraceae    | <i>Elephantopus</i> | <i>Elephantopus scaber</i>    | JN406935 |
| Eudicotyledons | Asteraceae    | <i>Elephantopus</i> | <i>Elephantopus scaber</i>    | JN406936 |
| Eudicotyledons | Asteraceae    | <i>Elephantopus</i> | <i>Elephantopus scaber</i>    | JN406937 |
| Eudicotyledons | Asteraceae    | <i>Elephantopus</i> | <i>Elephantopus scaber</i>    | JN406938 |
| Eudicotyledons | Berberidaceae | <i>Berberis</i>     | <i>Berberis chitria</i>       | GU934930 |
| Eudicotyledons | Berberidaceae | <i>Berberis</i>     | <i>Berberis chitria</i>       | GU934931 |
| Eudicotyledons | Berberidaceae | <i>Berberis</i>     | <i>Berberis chitria</i>       | GU934932 |
| Eudicotyledons | Berberidaceae | <i>Berberis</i>     | <i>Berberis chitria</i>       | GU934933 |

|                |               |                  |                                |          |
|----------------|---------------|------------------|--------------------------------|----------|
| Eudicotyledons | Berberidaceae | <i>Berberis</i>  | <i>Berberis chitria</i>        | GU934935 |
| Eudicotyledons | Berberidaceae | <i>Berberis</i>  | <i>Berberis chitria</i>        | GU934936 |
| Eudicotyledons | Berberidaceae | <i>Berberis</i>  | <i>Berberis chitria</i>        | GU934937 |
| Eudicotyledons | Rutaceae      | <i>Citrus</i>    | <i>Citrus limetta</i>          | JN315368 |
| Eudicotyledons | Rutaceae      | <i>Citrus</i>    | <i>Citrus limetta</i>          | JN315369 |
| Eudicotyledons | Rosaceae      | <i>Crataegus</i> | <i>Crataegus brachyacantha</i> | EF127137 |
| Eudicotyledons | Rosaceae      | <i>Crataegus</i> | <i>Crataegus brachyacantha</i> | EU682691 |
| Eudicotyledons | Rosaceae      | <i>Crataegus</i> | <i>Crataegus calpodendron</i>  | EF127120 |
| Eudicotyledons | Rosaceae      | <i>Crataegus</i> | <i>Crataegus calpodendron</i>  | EU682690 |
| Eudicotyledons | Rosaceae      | <i>Crataegus</i> | <i>Crataegus chlorosarca</i>   | EF127147 |
| Eudicotyledons | Rosaceae      | <i>Crataegus</i> | <i>Crataegus chlorosarca</i>   | EU682698 |
| Eudicotyledons | Rosaceae      | <i>Crataegus</i> | <i>Crataegus heldreichii</i>   | EF127127 |
| Eudicotyledons | Rosaceae      | <i>Crataegus</i> | <i>Crataegus heldreichii</i>   | EU500295 |
| Eudicotyledons | Rosaceae      | <i>Crataegus</i> | <i>Crataegus marshallii</i>    | EF127132 |
| Eudicotyledons | Rosaceae      | <i>Crataegus</i> | <i>Crataegus marshallii</i>    | EU682703 |
| Eudicotyledons | Rosaceae      | <i>Crataegus</i> | <i>Crataegus maximowiczii</i>  | EF127146 |
| Eudicotyledons | Rosaceae      | <i>Crataegus</i> | <i>Crataegus maximowiczii</i>  | EU682697 |
| Eudicotyledons | Rosaceae      | <i>Crataegus</i> | <i>Crataegus opaca</i>         | EF127125 |
| Eudicotyledons | Rosaceae      | <i>Crataegus</i> | <i>Crataegus opaca</i>         | EU682699 |
| Eudicotyledons | Rosaceae      | <i>Crataegus</i> | <i>Crataegus pentagyna</i>     | EF127131 |
| Eudicotyledons | Rosaceae      | <i>Crataegus</i> | <i>Crataegus pentagyna</i>     | EU682702 |
| Eudicotyledons | Rosaceae      | <i>Crataegus</i> | <i>Crataegus phaenopyrum</i>   | EF127133 |
| Eudicotyledons | Rosaceae      | <i>Crataegus</i> | <i>Crataegus phaenopyrum</i>   | EU682700 |
| Eudicotyledons | Rosaceae      | <i>Crataegus</i> | <i>Crataegus punctata</i>      | EF127123 |
| Eudicotyledons | Rosaceae      | <i>Crataegus</i> | <i>Crataegus punctata</i>      | HQ596659 |
| Eudicotyledons | Rosaceae      | <i>Crataegus</i> | <i>Crataegus punctata</i>      | EU682695 |
| Eudicotyledons | Rosaceae      | <i>Crataegus</i> | <i>Crataegus saligna</i>       | EF127138 |
| Eudicotyledons | Rosaceae      | <i>Crataegus</i> | <i>Crataegus saligna</i>       | EU682694 |
| Eudicotyledons | Rosaceae      | <i>Crataegus</i> | <i>Crataegus songarica</i>     | EF127129 |
| Eudicotyledons | Rosaceae      | <i>Crataegus</i> | <i>Crataegus songarica</i>     | EU500300 |
| Eudicotyledons | Rosaceae      | <i>Crataegus</i> | <i>Crataegus spathulata</i>    | EF127134 |
| Eudicotyledons | Rosaceae      | <i>Crataegus</i> | <i>Crataegus spathulata</i>    | EU682701 |
| Eudicotyledons | Rosaceae      | <i>Crataegus</i> | <i>Crataegus suksdorfii</i>    | EF127139 |
| Eudicotyledons | Rosaceae      | <i>Crataegus</i> | <i>Crataegus suksdorfii</i>    | EF127140 |
| Eudicotyledons | Rosaceae      | <i>Crataegus</i> | <i>Crataegus suksdorfii</i>    | EU572741 |
| Eudicotyledons | Rosaceae      | <i>Crataegus</i> | <i>Crataegus suksdorfii</i>    | EU572742 |
| Eudicotyledons | Rosaceae      | <i>Crataegus</i> | <i>Crataegus suksdorfii</i>    | EU572743 |
| Eudicotyledons | Rosaceae      | <i>Crataegus</i> | <i>Crataegus suksdorfii</i>    | EU572744 |
| Eudicotyledons | Rosaceae      | <i>Crataegus</i> | <i>Crataegus suksdorfii</i>    | EU572745 |
| Eudicotyledons | Rosaceae      | <i>Crataegus</i> | <i>Crataegus suksdorfii</i>    | EU572746 |
| Eudicotyledons | Rosaceae      | <i>Crataegus</i> | <i>Crataegus suksdorfii</i>    | EU572747 |
| Eudicotyledons | Rosaceae      | <i>Crataegus</i> | <i>Crataegus suksdorfii</i>    | EU572748 |
| Eudicotyledons | Rosaceae      | <i>Crataegus</i> | <i>Crataegus suksdorfii</i>    | EU572749 |
| Eudicotyledons | Rosaceae      | <i>Crataegus</i> | <i>Crataegus suksdorfii</i>    | EU572750 |
| Eudicotyledons | Rosaceae      | <i>Crataegus</i> | <i>Crataegus suksdorfii</i>    | EU572751 |
| Eudicotyledons | Rosaceae      | <i>Crataegus</i> | <i>Crataegus suksdorfii</i>    | EU572752 |
| Eudicotyledons | Rosaceae      | <i>Crataegus</i> | <i>Crataegus suksdorfii</i>    | EU572753 |
| Eudicotyledons | Rosaceae      | <i>Crataegus</i> | <i>Crataegus suksdorfii</i>    | EU572754 |
| Eudicotyledons | Rosaceae      | <i>Crataegus</i> | <i>Crataegus suksdorfii</i>    | EU572755 |
| Eudicotyledons | Rosaceae      | <i>Crataegus</i> | <i>Crataegus suksdorfii</i>    | EU572756 |
| Eudicotyledons | Rosaceae      | <i>Crataegus</i> | <i>Crataegus suksdorfii</i>    | EU572757 |
| Eudicotyledons | Rosaceae      | <i>Crataegus</i> | <i>Crataegus suksdorfii</i>    | EU572758 |
| Eudicotyledons | Rosaceae      | <i>Crataegus</i> | <i>Crataegus suksdorfii</i>    | EU572759 |



|                |               |                  |                              |          |
|----------------|---------------|------------------|------------------------------|----------|
| Eudicotyledons | Rosaceae      | <i>Crataegus</i> | <i>Crataegus suksdorfii</i>  | EU682692 |
| Eudicotyledons | Rosaceae      | <i>Crataegus</i> | <i>Crataegus suksdorfii</i>  | EU682693 |
| Eudicotyledons | Rosaceae      | <i>Crataegus</i> | <i>Crataegus triflora</i>    | EF127121 |
| Eudicotyledons | Rosaceae      | <i>Crataegus</i> | <i>Crataegus triflora</i>    | EU500260 |
| Eudicotyledons | Rosaceae      | <i>Crataegus</i> | <i>Crataegus uniflora</i>    | EF127149 |
| Eudicotyledons | Rosaceae      | <i>Crataegus</i> | <i>Crataegus uniflora</i>    | EU682689 |
| Eudicotyledons | Rosaceae      | <i>Crataegus</i> | <i>Crataegus viridis</i>     | EF127150 |
| Eudicotyledons | Rosaceae      | <i>Crataegus</i> | <i>Crataegus viridis</i>     | EU682688 |
| Eudicotyledons | Solanaceae    | <i>Lycium</i>    | <i>Lycium pumilum</i>        | HM195010 |
| Eudicotyledons | Solanaceae    | <i>Lycium</i>    | <i>Lycium pumilum</i>        | FJ189621 |
| Eudicotyledons | Solanaceae    | <i>Nolana</i>    | <i>Nolana coelestis</i>      | FJ189605 |
| Eudicotyledons | Solanaceae    | <i>Nolana</i>    | <i>Nolana coelestis</i>      | EU742457 |
| Eudicotyledons | Solanaceae    | <i>Nolana</i>    | <i>Nolana werdermannii</i>   | FJ189604 |
| Eudicotyledons | Solanaceae    | <i>Nolana</i>    | <i>Nolana werdermannii</i>   | EU742506 |
| Eudicotyledons | Ranunculaceae | <i>Anemone</i>   | <i>Anemone amurensis</i>     | EF139299 |
| Eudicotyledons | Ranunculaceae | <i>Anemone</i>   | <i>Anemone amurensis</i>     | EF139300 |
| Eudicotyledons | Ranunculaceae | <i>Anemone</i>   | <i>Anemone amurensis</i>     | EF139301 |
| Eudicotyledons | Ranunculaceae | <i>Anemone</i>   | <i>Anemone amurensis</i>     | EF139302 |
| Eudicotyledons | Ranunculaceae | <i>Anemone</i>   | <i>Anemone amurensis</i>     | EF139303 |
| Eudicotyledons | Ranunculaceae | <i>Anemone</i>   | <i>Anemone amurensis</i>     | EF139304 |
| Eudicotyledons | Ranunculaceae | <i>Anemone</i>   | <i>Anemone amurensis</i>     | EF139305 |
| Eudicotyledons | Ranunculaceae | <i>Anemone</i>   | <i>Anemone amurensis</i>     | EF139306 |
| Eudicotyledons | Ranunculaceae | <i>Anemone</i>   | <i>Anemone amurensis</i>     | EF139307 |
| Eudicotyledons | Ranunculaceae | <i>Anemone</i>   | <i>Anemone pendulisepala</i> | EF139289 |
| Eudicotyledons | Ranunculaceae | <i>Anemone</i>   | <i>Anemone pendulisepala</i> | EF139290 |
| Eudicotyledons | Ranunculaceae | <i>Anemone</i>   | <i>Anemone pendulisepala</i> | EF139291 |
| Eudicotyledons | Ranunculaceae | <i>Anemone</i>   | <i>Anemone pendulisepala</i> | EF139292 |
| Eudicotyledons | Ranunculaceae | <i>Anemone</i>   | <i>Anemone pendulisepala</i> | EF139293 |
| Eudicotyledons | Ranunculaceae | <i>Anemone</i>   | <i>Anemone pendulisepala</i> | EF139294 |
| Eudicotyledons | Ranunculaceae | <i>Anemone</i>   | <i>Anemone pendulisepala</i> | EF139295 |
| Eudicotyledons | Ranunculaceae | <i>Anemone</i>   | <i>Anemone pendulisepala</i> | EF139296 |
| Eudicotyledons | Ranunculaceae | <i>Anemone</i>   | <i>Anemone pendulisepala</i> | EF139297 |
| Eudicotyledons | Ranunculaceae | <i>Anemone</i>   | <i>Anemone pendulisepala</i> | EF139298 |
| Eudicotyledons | Ranunculaceae | <i>Anemone</i>   | <i>Anemone reflexa</i>       | EF139308 |
| Eudicotyledons | Ranunculaceae | <i>Anemone</i>   | <i>Anemone reflexa</i>       | EF139309 |
| Eudicotyledons | Ranunculaceae | <i>Anemone</i>   | <i>Anemone reflexa</i>       | EF139310 |
| Eudicotyledons | Ranunculaceae | <i>Anemone</i>   | <i>Anemone reflexa</i>       | EF139311 |
| Eudicotyledons | Ranunculaceae | <i>Anemone</i>   | <i>Anemone reflexa</i>       | EF139312 |
| Eudicotyledons | Ranunculaceae | <i>Anemone</i>   | <i>Anemone reflexa</i>       | EF139313 |
| Eudicotyledons | Ranunculaceae | <i>Anemone</i>   | <i>Anemone stolonifera</i>   | EF139278 |
| Eudicotyledons | Ranunculaceae | <i>Anemone</i>   | <i>Anemone stolonifera</i>   | EF139279 |
| Eudicotyledons | Lamiaceae     | <i>Salvia</i>    | <i>Salvia plebeia</i>        | JQ339261 |
| Eudicotyledons | Lamiaceae     | <i>Salvia</i>    | <i>Salvia plebeia</i>        | JQ339262 |
| Eudicotyledons | Lamiaceae     | <i>Salvia</i>    | <i>Salvia plebeia</i>        | FJ513114 |
| Eudicotyledons | Lamiaceae     | <i>Isodon</i>    | <i>Isodon japonicus</i>      | AB446238 |
| Eudicotyledons | Lamiaceae     | <i>Isodon</i>    | <i>Isodon japonicus</i>      | AB446239 |
| Eudicotyledons | Lamiaceae     | <i>Isodon</i>    | <i>Isodon japonicus</i>      | AB446240 |
| Eudicotyledons | Lamiaceae     | <i>Isodon</i>    | <i>Isodon japonicus</i>      | AB556804 |
| Eudicotyledons | Lamiaceae     | <i>Isodon</i>    | <i>Isodon japonicus</i>      | AB556815 |
| Eudicotyledons | Lamiaceae     | <i>Isodon</i>    | <i>Isodon japonicus</i>      | FJ513115 |
| Eudicotyledons | Lamiaceae     | <i>Isodon</i>    | <i>Isodon trichocarpus</i>   | AB556805 |
| Eudicotyledons | Lamiaceae     | <i>Isodon</i>    | <i>Isodon trichocarpus</i>   | AB556810 |
| Eudicotyledons | Tamaricaceae  | <i>Myricaria</i> | <i>Myricaria paniculata</i>  | EU240616 |

|                |               |                   |                                |          |
|----------------|---------------|-------------------|--------------------------------|----------|
| Eudicotyledons | Tamaricaceae  | <i>Myricaria</i>  | <i>Myricaria paniculata</i>    | EF394258 |
| Eudicotyledons | Tamaricaceae  | <i>Myricaria</i>  | <i>Myricaria paniculata</i>    | EF394259 |
| Eudicotyledons | Tamaricaceae  | <i>Myricaria</i>  | <i>Myricaria paniculata</i>    | EF394260 |
| Eudicotyledons | Tamaricaceae  | <i>Myricaria</i>  | <i>Myricaria paniculata</i>    | EF394261 |
| Eudicotyledons | Tamaricaceae  | <i>Myricaria</i>  | <i>Myricaria paniculata</i>    | EF394262 |
| Eudicotyledons | Tamaricaceae  | <i>Myricaria</i>  | <i>Myricaria paniculata</i>    | EF394263 |
| Eudicotyledons | Tamaricaceae  | <i>Myricaria</i>  | <i>Myricaria platyphylla</i>   | EU240618 |
| Eudicotyledons | Tamaricaceae  | <i>Myricaria</i>  | <i>Myricaria platyphylla</i>   | EF394284 |
| Eudicotyledons | Tamaricaceae  | <i>Myricaria</i>  | <i>Myricaria platyphylla</i>   | EF394285 |
| Eudicotyledons | Tamaricaceae  | <i>Myricaria</i>  | <i>Myricaria prostrata</i>     | EU240624 |
| Eudicotyledons | Tamaricaceae  | <i>Myricaria</i>  | <i>Myricaria prostrata</i>     | EF394292 |
| Eudicotyledons | Tamaricaceae  | <i>Myricaria</i>  | <i>Myricaria pulcherrima</i>   | EU240619 |
| Eudicotyledons | Tamaricaceae  | <i>Myricaria</i>  | <i>Myricaria pulcherrima</i>   | EF394286 |
| Eudicotyledons | Tamaricaceae  | <i>Myricaria</i>  | <i>Myricaria pulcherrima</i>   | EF394287 |
| Eudicotyledons | Tamaricaceae  | <i>Myricaria</i>  | <i>Myricaria pulcherrima</i>   | EF394288 |
| Eudicotyledons | Tamaricaceae  | <i>Myricaria</i>  | <i>Myricaria pulcherrima</i>   | EF394289 |
| Eudicotyledons | Tamaricaceae  | <i>Myricaria</i>  | <i>Myricaria pulcherrima</i>   | EF394290 |
| Eudicotyledons | Tamaricaceae  | <i>Myricaria</i>  | <i>Myricaria rosea</i>         | EU240621 |
| Eudicotyledons | Tamaricaceae  | <i>Myricaria</i>  | <i>Myricaria rosea</i>         | EF394291 |
| Eudicotyledons | Tamaricaceae  | <i>Myricaria</i>  | <i>Myricaria wardii</i>        | EU240622 |
| Eudicotyledons | Tamaricaceae  | <i>Myricaria</i>  | <i>Myricaria wardii</i>        | EU240623 |
| Eudicotyledons | Tamaricaceae  | <i>Myricaria</i>  | <i>Myricaria wardii</i>        | EF394274 |
| Eudicotyledons | Tamaricaceae  | <i>Myricaria</i>  | <i>Myricaria wardii</i>        | EF394275 |
| Eudicotyledons | Tamaricaceae  | <i>Myricaria</i>  | <i>Myricaria wardii</i>        | EF394276 |
| Eudicotyledons | Tamaricaceae  | <i>Myricaria</i>  | <i>Myricaria wardii</i>        | EF394277 |
| Eudicotyledons | Tamaricaceae  | <i>Myricaria</i>  | <i>Myricaria wardii</i>        | EF394278 |
| Eudicotyledons | Tamaricaceae  | <i>Myricaria</i>  | <i>Myricaria wardii</i>        | EF394279 |
| Eudicotyledons | Tamaricaceae  | <i>Myricaria</i>  | <i>Myricaria wardii</i>        | EF394280 |
| Eudicotyledons | Tamaricaceae  | <i>Myricaria</i>  | <i>Myricaria wardii</i>        | EF394281 |
| Eudicotyledons | Tamaricaceae  | <i>Myricaria</i>  | <i>Myricaria wardii</i>        | EF394282 |
| Eudicotyledons | Tamaricaceae  | <i>Myricaria</i>  | <i>Myricaria wardii</i>        | EF394283 |
| Eudicotyledons | Tamaricaceae  | <i>Myricaria</i>  | <i>Myricaria wardii</i>        | EF394296 |
| Eudicotyledons | Hydrangeaceae | <i>Hydrangea</i>  | <i>Hydrangea xanthoneura</i>   | GQ248320 |
| Eudicotyledons | Hydrangeaceae | <i>Hydrangea</i>  | <i>Hydrangea xanthoneura</i>   | EF590703 |
| Eudicotyledons | Hydrangeaceae | <i>Hydrangea</i>  | <i>Hydrangea xanthoneura</i>   | HM216996 |
| Eudicotyledons | Rosaceae      | <i>Photinia</i>   | <i>Photinia beauverdiana</i>   | JQ390759 |
| Eudicotyledons | Rosaceae      | <i>Photinia</i>   | <i>Photinia beauverdiana</i>   | HQ427047 |
| Eudicotyledons | Rosaceae      | <i>Photinia</i>   | <i>Photinia beauverdiana</i>   | GQ305321 |
| Eudicotyledons | Rosaceae      | <i>Photinia</i>   | <i>Photinia parvifolia</i>     | HQ427049 |
| Eudicotyledons | Rosaceae      | <i>Photinia</i>   | <i>Photinia parvifolia</i>     | GQ305319 |
| Eudicotyledons | Rosaceae      | <i>Potentilla</i> | <i>Potentilla pensylvanica</i> | GQ384994 |
| Eudicotyledons | Rosaceae      | <i>Potentilla</i> | <i>Potentilla pensylvanica</i> | GQ385023 |
| Eudicotyledons | Solanaceae    | <i>Nolana</i>     | <i>Nolana lezamae</i>          | EU742477 |
| Eudicotyledons | Solanaceae    | <i>Nolana</i>     | <i>Nolana lezamae</i>          | FJ914093 |
| Eudicotyledons | Solanaceae    | <i>Nolana</i>     | <i>Nolana arequipensis</i>     | EU742448 |
| Eudicotyledons | Solanaceae    | <i>Nolana</i>     | <i>Nolana arequipensis</i>     | FJ914082 |
| Eudicotyledons | Solanaceae    | <i>Nolana</i>     | <i>Nolana plicata</i>          | EU742486 |
| Eudicotyledons | Solanaceae    | <i>Nolana</i>     | <i>Nolana plicata</i>          | FJ914083 |
| Eudicotyledons | Solanaceae    | <i>Nolana</i>     | <i>Nolana sessiliflora</i>     | EU742494 |
| Eudicotyledons | Solanaceae    | <i>Nolana</i>     | <i>Nolana sessiliflora</i>     | FJ914065 |
| Eudicotyledons | Moraceae      | <i>Ficus</i>      | <i>Ficus hispida</i>           | GU935101 |
| Eudicotyledons | Moraceae      | <i>Ficus</i>      | <i>Ficus hispida</i>           | GU935102 |
| Eudicotyledons | Moraceae      | <i>Ficus</i>      | <i>Ficus hispida</i>           | GU935103 |

|                |                 |                  |                                   |          |
|----------------|-----------------|------------------|-----------------------------------|----------|
| Eudicotyledons | Moraceae        | <i>Ficus</i>     | <i>Ficus hispida</i>              | JN044527 |
| Eudicotyledons | Moraceae        | <i>Ficus</i>     | <i>Ficus hispida</i>              | JN044528 |
| Eudicotyledons | Moraceae        | <i>Ficus</i>     | <i>Ficus cyrtophylla</i>          | JN044513 |
| Eudicotyledons | Moraceae        | <i>Ficus</i>     | <i>Ficus cyrtophylla</i>          | JN044514 |
| Eudicotyledons | Moraceae        | <i>Ficus</i>     | <i>Ficus cyrtophylla</i>          | JN044515 |
| Eudicotyledons | Moraceae        | <i>Ficus</i>     | <i>Ficus semicordata</i>          | JN044536 |
| Eudicotyledons | Moraceae        | <i>Ficus</i>     | <i>Ficus semicordata</i>          | JN044537 |
| Eudicotyledons | Moraceae        | <i>Ficus</i>     | <i>Ficus semicordata</i>          | JN044538 |
| Eudicotyledons | Moraceae        | <i>Ficus</i>     | <i>Ficus semicordata</i>          | JN044539 |
| Eudicotyledons | Moraceae        | <i>Ficus</i>     | <i>Ficus tikoua</i>               | JN044540 |
| Eudicotyledons | Moraceae        | <i>Ficus</i>     | <i>Ficus tikoua</i>               | JN044541 |
| Eudicotyledons | Moraceae        | <i>Ficus</i>     | <i>Ficus vasculosa</i>            | HQ415499 |
| Eudicotyledons | Moraceae        | <i>Ficus</i>     | <i>Ficus vasculosa</i>            | JN044548 |
| Eudicotyledons | Moraceae        | <i>Ficus</i>     | <i>Ficus vasculosa</i>            | JN044549 |
| Eudicotyledons | Melastomataceae | <i>Miconia</i>   | <i>Miconia longispicata</i>       | JN661731 |
| Eudicotyledons | Melastomataceae | <i>Miconia</i>   | <i>Miconia longispicata</i>       | JN661747 |
| Eudicotyledons | Melastomataceae | <i>Miconia</i>   | <i>Miconia longispicata</i>       | JN661759 |
| Eudicotyledons | Moraceae        | <i>Ficus</i>     | <i>Ficus glaberrima</i>           | JN044518 |
| Eudicotyledons | Moraceae        | <i>Ficus</i>     | <i>Ficus glaberrima</i>           | JN044519 |
| Eudicotyledons | Moraceae        | <i>Ficus</i>     | <i>Ficus glaberrima</i>           | JN044520 |
| Eudicotyledons | Moraceae        | <i>Ficus</i>     | <i>Ficus glaberrima</i>           | JN044521 |
| Eudicotyledons | Anacardiaceae   | <i>Searsia</i>   | <i>Searsia gueinzii</i>           | EU213842 |
| Eudicotyledons | Anacardiaceae   | <i>Searsia</i>   | <i>Searsia gueinzii</i>           | EU213843 |
| Eudicotyledons | Anacardiaceae   | <i>Searsia</i>   | <i>Searsia gueinzii</i>           | EU213844 |
| Eudicotyledons | Anacardiaceae   | <i>Searsia</i>   | <i>Searsia transvaalensis</i>     | EU213848 |
| Eudicotyledons | Anacardiaceae   | <i>Searsia</i>   | <i>Searsia transvaalensis</i>     | EU213849 |
| Eudicotyledons | Anacardiaceae   | <i>Searsia</i>   | <i>Searsia transvaalensis</i>     | EU213850 |
| Eudicotyledons | Loganiaceae     | <i>Strychnos</i> | <i>Strychnos madagascariensis</i> | EU213860 |
| Eudicotyledons | Loganiaceae     | <i>Strychnos</i> | <i>Strychnos madagascariensis</i> | EU213861 |
| Eudicotyledons | Loganiaceae     | <i>Strychnos</i> | <i>Strychnos madagascariensis</i> | EU213862 |
| Eudicotyledons | Rosaceae        | <i>Crataegus</i> | <i>Crataegus castlegarensis</i>   | EU500278 |
| Eudicotyledons | Rosaceae        | <i>Crataegus</i> | <i>Crataegus castlegarensis</i>   | EU572868 |
| Eudicotyledons | Rosaceae        | <i>Crataegus</i> | <i>Crataegus castlegarensis</i>   | EU572869 |
| Eudicotyledons | Rosaceae        | <i>Crataegus</i> | <i>Crataegus castlegarensis</i>   | EU572870 |
| Eudicotyledons | Rosaceae        | <i>Crataegus</i> | <i>Crataegus castlegarensis</i>   | EU572871 |
| Eudicotyledons | Rosaceae        | <i>Crataegus</i> | <i>Crataegus castlegarensis</i>   | EU572872 |
| Eudicotyledons | Rosaceae        | <i>Crataegus</i> | <i>Crataegus castlegarensis</i>   | EU572873 |
| Eudicotyledons | Rosaceae        | <i>Crataegus</i> | <i>Crataegus chrysocarpa</i>      | GU562399 |
| Eudicotyledons | Rosaceae        | <i>Crataegus</i> | <i>Crataegus chrysocarpa</i>      | EU500261 |
| Eudicotyledons | Rosaceae        | <i>Crataegus</i> | <i>Crataegus douglasii</i>        | EU500280 |
| Eudicotyledons | Rosaceae        | <i>Crataegus</i> | <i>Crataegus douglasii</i>        | EU572784 |
| Eudicotyledons | Rosaceae        | <i>Crataegus</i> | <i>Crataegus douglasii</i>        | EU572785 |
| Eudicotyledons | Rosaceae        | <i>Crataegus</i> | <i>Crataegus douglasii</i>        | EU572786 |
| Eudicotyledons | Rosaceae        | <i>Crataegus</i> | <i>Crataegus douglasii</i>        | EU572787 |
| Eudicotyledons | Rosaceae        | <i>Crataegus</i> | <i>Crataegus douglasii</i>        | EU572788 |
| Eudicotyledons | Rosaceae        | <i>Crataegus</i> | <i>Crataegus douglasii</i>        | EU572789 |
| Eudicotyledons | Rosaceae        | <i>Crataegus</i> | <i>Crataegus douglasii</i>        | EU572790 |
| Eudicotyledons | Rosaceae        | <i>Crataegus</i> | <i>Crataegus douglasii</i>        | EU572791 |
| Eudicotyledons | Rosaceae        | <i>Crataegus</i> | <i>Crataegus douglasii</i>        | EU572792 |
| Eudicotyledons | Rosaceae        | <i>Crataegus</i> | <i>Crataegus douglasii</i>        | EU572793 |
| Eudicotyledons | Rosaceae        | <i>Crataegus</i> | <i>Crataegus douglasii</i>        | EU572794 |
| Eudicotyledons | Rosaceae        | <i>Crataegus</i> | <i>Crataegus douglasii</i>        | EU572795 |
| Eudicotyledons | Rosaceae        | <i>Crataegus</i> | <i>Crataegus douglasii</i>        | EU572796 |

|                |           |                    |                              |          |
|----------------|-----------|--------------------|------------------------------|----------|
| Eudicotyledons | Rosaceae  | <i>Crataegus</i>   | <i>Crataegus douglasii</i>   | EU572797 |
| Eudicotyledons | Rosaceae  | <i>Crataegus</i>   | <i>Crataegus douglasii</i>   | EU572798 |
| Eudicotyledons | Rosaceae  | <i>Crataegus</i>   | <i>Crataegus douglasii</i>   | EU572799 |
| Eudicotyledons | Rosaceae  | <i>Crataegus</i>   | <i>Crataegus douglasii</i>   | EU572800 |
| Eudicotyledons | Rosaceae  | <i>Crataegus</i>   | <i>Crataegus douglasii</i>   | EU572801 |
| Eudicotyledons | Rosaceae  | <i>Crataegus</i>   | <i>Crataegus douglasii</i>   | EU572802 |
| Eudicotyledons | Rosaceae  | <i>Crataegus</i>   | <i>Crataegus douglasii</i>   | EU572803 |
| Eudicotyledons | Rosaceae  | <i>Crataegus</i>   | <i>Crataegus douglasii</i>   | EU572804 |
| Eudicotyledons | Rosaceae  | <i>Crataegus</i>   | <i>Crataegus douglasii</i>   | EU572805 |
| Eudicotyledons | Rosaceae  | <i>Crataegus</i>   | <i>Crataegus douglasii</i>   | EU572806 |
| Eudicotyledons | Rosaceae  | <i>Crataegus</i>   | <i>Crataegus douglasii</i>   | EU572807 |
| Eudicotyledons | Rosaceae  | <i>Crataegus</i>   | <i>Crataegus douglasii</i>   | EU572808 |
| Eudicotyledons | Rosaceae  | <i>Crataegus</i>   | <i>Crataegus douglasii</i>   | EU572809 |
| Eudicotyledons | Rosaceae  | <i>Crataegus</i>   | <i>Crataegus douglasii</i>   | EU572810 |
| Eudicotyledons | Rosaceae  | <i>Crataegus</i>   | <i>Crataegus douglasii</i>   | EU572811 |
| Eudicotyledons | Rosaceae  | <i>Crataegus</i>   | <i>Crataegus douglasii</i>   | EU572812 |
| Eudicotyledons | Rosaceae  | <i>Crataegus</i>   | <i>Crataegus douglasii</i>   | EU572813 |
| Eudicotyledons | Rosaceae  | <i>Crataegus</i>   | <i>Crataegus douglasii</i>   | EU572814 |
| Eudicotyledons | Rosaceae  | <i>Crataegus</i>   | <i>Crataegus douglasii</i>   | EU572815 |
| Eudicotyledons | Rosaceae  | <i>Crataegus</i>   | <i>Crataegus douglasii</i>   | EU572816 |
| Eudicotyledons | Rosaceae  | <i>Crataegus</i>   | <i>Crataegus douglasii</i>   | EU572817 |
| Eudicotyledons | Rosaceae  | <i>Crataegus</i>   | <i>Crataegus douglasii</i>   | EU572818 |
| Eudicotyledons | Rosaceae  | <i>Crataegus</i>   | <i>Crataegus douglasii</i>   | EU572819 |
| Eudicotyledons | Rosaceae  | <i>Crataegus</i>   | <i>Crataegus douglasii</i>   | EU572820 |
| Eudicotyledons | Rosaceae  | <i>Crataegus</i>   | <i>Crataegus douglasii</i>   | EU572821 |
| Eudicotyledons | Rosaceae  | <i>Crataegus</i>   | <i>Crataegus douglasii</i>   | EU572838 |
| Eudicotyledons | Rosaceae  | <i>Crataegus</i>   | <i>Crataegus douglasii</i>   | EU572839 |
| Eudicotyledons | Rosaceae  | <i>Crataegus</i>   | <i>Crataegus douglasii</i>   | EU572840 |
| Eudicotyledons | Rosaceae  | <i>Crataegus</i>   | <i>Crataegus douglasii</i>   | EU572841 |
| Eudicotyledons | Rosaceae  | <i>Crataegus</i>   | <i>Crataegus douglasii</i>   | EU572842 |
| Eudicotyledons | Rosaceae  | <i>Crataegus</i>   | <i>Crataegus douglasii</i>   | EU572843 |
| Eudicotyledons | Rosaceae  | <i>Crataegus</i>   | <i>Crataegus douglasii</i>   | EU572844 |
| Eudicotyledons | Rosaceae  | <i>Crataegus</i>   | <i>Crataegus douglasii</i>   | EU572845 |
| Eudicotyledons | Rosaceae  | <i>Crataegus</i>   | <i>Crataegus douglasii</i>   | EU572846 |
| Eudicotyledons | Rosaceae  | <i>Crataegus</i>   | <i>Crataegus douglasii</i>   | EU572847 |
| Eudicotyledons | Rosaceae  | <i>Crataegus</i>   | <i>Crataegus douglasii</i>   | EU572848 |
| Eudicotyledons | Rosaceae  | <i>Crataegus</i>   | <i>Crataegus douglasii</i>   | EU572849 |
| Eudicotyledons | Rosaceae  | <i>Crataegus</i>   | <i>Crataegus macracantha</i> | GU562392 |
| Eudicotyledons | Rosaceae  | <i>Crataegus</i>   | <i>Crataegus macracantha</i> | HQ596655 |
| Eudicotyledons | Rosaceae  | <i>Crataegus</i>   | <i>Crataegus macracantha</i> | EU500259 |
| Eudicotyledons | Rosaceae  | <i>Crataegus</i>   | <i>Crataegus okennonii</i>   | EU500279 |
| Eudicotyledons | Rosaceae  | <i>Crataegus</i>   | <i>Crataegus okennonii</i>   | EU572863 |
| Eudicotyledons | Rosaceae  | <i>Crataegus</i>   | <i>Crataegus okennonii</i>   | EU572864 |
| Eudicotyledons | Rosaceae  | <i>Crataegus</i>   | <i>Crataegus okennonii</i>   | EU572865 |
| Eudicotyledons | Rosaceae  | <i>Crataegus</i>   | <i>Crataegus okennonii</i>   | EU572866 |
| Eudicotyledons | Rosaceae  | <i>Crataegus</i>   | <i>Crataegus okennonii</i>   | EU572867 |
| Eudicotyledons | Rosaceae  | <i>Crataegus</i>   | <i>Crataegus pinnatifida</i> | EU500276 |
| Eudicotyledons | Rosaceae  | <i>Crataegus</i>   | <i>Crataegus pinnatifida</i> | EU500292 |
| Eudicotyledons | Lamiaceae | <i>Clinopodium</i> | <i>Clinopodium chinense</i>  | EU590865 |
| Eudicotyledons | Lamiaceae | <i>Clinopodium</i> | <i>Clinopodium chinense</i>  | FJ513089 |
| Eudicotyledons | Lamiaceae | <i>Glechoma</i>    | <i>Glechoma longituba</i>    | EU590860 |
| Eudicotyledons | Lamiaceae | <i>Glechoma</i>    | <i>Glechoma longituba</i>    | JF708216 |
| Eudicotyledons | Fagaceae  | <i>Quercus</i>     | <i>Quercus macrocarpa</i>    | HQ596806 |

|                |              |                   |                                   |          |
|----------------|--------------|-------------------|-----------------------------------|----------|
| Eudicotyledons | Fagaceae     | <i>Quercus</i>    | <i>Quercus macrocarpa</i>         | EU750511 |
| Eudicotyledons | Fagaceae     | <i>Quercus</i>    | <i>Quercus macrocarpa</i>         | EU750512 |
| Eudicotyledons | Rosaceae     | <i>Potentilla</i> | <i>Potentilla recta</i>           | HQ596800 |
| Eudicotyledons | Rosaceae     | <i>Potentilla</i> | <i>Potentilla recta</i>           | GQ384960 |
| Eudicotyledons | Fabaceae     | <i>Astragalus</i> | <i>Astragalus trichopodus</i>     | GU396746 |
| Eudicotyledons | Fabaceae     | <i>Astragalus</i> | <i>Astragalus trichopodus</i>     | GU396747 |
| Eudicotyledons | Fabaceae     | <i>Astragalus</i> | <i>Astragalus trichopodus</i>     | GU396748 |
| Eudicotyledons | Lamiaceae    | <i>Phlomis</i>    | <i>Phlomis fruticosa</i>          | EU627580 |
| Eudicotyledons | Lamiaceae    | <i>Phlomis</i>    | <i>Phlomis fruticosa</i>          | EU627581 |
| Eudicotyledons | Lamiaceae    | <i>Phlomis</i>    | <i>Phlomis fruticosa</i>          | EU627582 |
| Eudicotyledons | Lamiaceae    | <i>Phlomis</i>    | <i>Phlomis fruticosa</i>          | HQ902857 |
| Eudicotyledons | Lamiaceae    | <i>Isodon</i>     | <i>Isodon longitubus</i>          | AB446204 |
| Eudicotyledons | Lamiaceae    | <i>Isodon</i>     | <i>Isodon longitubus</i>          | AB446205 |
| Eudicotyledons | Lamiaceae    | <i>Isodon</i>     | <i>Isodon longitubus</i>          | AB446206 |
| Eudicotyledons | Lamiaceae    | <i>Isodon</i>     | <i>Isodon longitubus</i>          | AB446207 |
| Eudicotyledons | Lamiaceae    | <i>Isodon</i>     | <i>Isodon longitubus</i>          | AB446208 |
| Eudicotyledons | Lamiaceae    | <i>Isodon</i>     | <i>Isodon longitubus</i>          | AB446209 |
| Eudicotyledons | Lamiaceae    | <i>Isodon</i>     | <i>Isodon longitubus</i>          | AB446210 |
| Eudicotyledons | Lamiaceae    | <i>Isodon</i>     | <i>Isodon longitubus</i>          | AB446211 |
| Eudicotyledons | Lamiaceae    | <i>Isodon</i>     | <i>Isodon longitubus</i>          | AB446212 |
| Eudicotyledons | Lamiaceae    | <i>Isodon</i>     | <i>Isodon longitubus</i>          | AB446213 |
| Eudicotyledons | Lamiaceae    | <i>Isodon</i>     | <i>Isodon longitubus</i>          | AB446214 |
| Eudicotyledons | Lamiaceae    | <i>Isodon</i>     | <i>Isodon longitubus</i>          | AB446215 |
| Eudicotyledons | Lamiaceae    | <i>Isodon</i>     | <i>Isodon longitubus</i>          | AB446216 |
| Eudicotyledons | Lamiaceae    | <i>Isodon</i>     | <i>Isodon longitubus</i>          | AB446217 |
| Eudicotyledons | Lamiaceae    | <i>Isodon</i>     | <i>Isodon longitubus</i>          | AB446218 |
| Eudicotyledons | Lamiaceae    | <i>Isodon</i>     | <i>Isodon longitubus</i>          | AB446219 |
| Eudicotyledons | Lamiaceae    | <i>Isodon</i>     | <i>Isodon longitubus</i>          | AB446220 |
| Eudicotyledons | Lamiaceae    | <i>Isodon</i>     | <i>Isodon longitubus</i>          | AB446221 |
| Eudicotyledons | Lamiaceae    | <i>Isodon</i>     | <i>Isodon longitubus</i>          | AB446222 |
| Eudicotyledons | Lamiaceae    | <i>Isodon</i>     | <i>Isodon longitubus</i>          | AB556814 |
| Eudicotyledons | Lamiaceae    | <i>Isodon</i>     | <i>Isodon longitubus</i>          | AB556817 |
| Eudicotyledons | Lamiaceae    | <i>Isodon</i>     | <i>Isodon inflexus</i>            | AB446223 |
| Eudicotyledons | Lamiaceae    | <i>Isodon</i>     | <i>Isodon inflexus</i>            | AB446224 |
| Eudicotyledons | Lamiaceae    | <i>Isodon</i>     | <i>Isodon inflexus</i>            | AB446225 |
| Eudicotyledons | Lamiaceae    | <i>Isodon</i>     | <i>Isodon inflexus</i>            | AB446226 |
| Eudicotyledons | Lamiaceae    | <i>Isodon</i>     | <i>Isodon inflexus</i>            | AB446227 |
| Eudicotyledons | Lamiaceae    | <i>Isodon</i>     | <i>Isodon inflexus</i>            | AB446228 |
| Eudicotyledons | Lamiaceae    | <i>Isodon</i>     | <i>Isodon inflexus</i>            | AB556811 |
| Eudicotyledons | Lamiaceae    | <i>Isodon</i>     | <i>Isodon inflexus</i>            | AB556812 |
| Eudicotyledons | Lamiaceae    | <i>Isodon</i>     | <i>Isodon inflexus</i>            | FJ513099 |
| Eudicotyledons | Gentianaceae | <i>Gentiana</i>   | <i>Gentiana rigescens</i>         | GQ435170 |
| Eudicotyledons | Gentianaceae | <i>Gentiana</i>   | <i>Gentiana rigescens</i>         | GQ864033 |
| Eudicotyledons | Gentianaceae | <i>Gentiana</i>   | <i>Gentiana rigescens</i>         | GQ864034 |
| Eudicotyledons | Rubiaceae    | <i>Psychotria</i> | <i>Psychotria mexiae</i>          | FJ208689 |
| Eudicotyledons | Rubiaceae    | <i>Psychotria</i> | <i>Psychotria mexiae</i>          | FJ208703 |
| Eudicotyledons | Rubiaceae    | <i>Psychotria</i> | <i>Psychotria nubiphila</i>       | FJ208682 |
| Eudicotyledons | Rubiaceae    | <i>Psychotria</i> | <i>Psychotria nubiphila</i>       | FJ208684 |
| Eudicotyledons | Rubiaceae    | <i>Psychotria</i> | <i>Psychotria psychotriifolia</i> | FJ208686 |
| Eudicotyledons | Rubiaceae    | <i>Psychotria</i> | <i>Psychotria psychotriifolia</i> | FJ208690 |
| Eudicotyledons | Rubiaceae    | <i>Psychotria</i> | <i>Psychotria psychotriifolia</i> | GQ982345 |
| Eudicotyledons | Rosaceae     | <i>Potentilla</i> | <i>Potentilla aurea</i>           | GQ384978 |
| Eudicotyledons | Rosaceae     | <i>Potentilla</i> | <i>Potentilla aurea</i>           | GQ384984 |



|                |                  |                    |                                 |          |
|----------------|------------------|--------------------|---------------------------------|----------|
| Eudicotyledons | Meliaceae        | <i>Carapa</i>      | <i>Carapa procera</i>           | GQ428752 |
| Eudicotyledons | Meliaceae        | <i>Carapa</i>      | <i>Carapa procera</i>           | FJ039000 |
| Eudicotyledons | Meliaceae        | <i>Carapa</i>      | <i>Carapa procera</i>           | FJ039001 |
| Eudicotyledons | Meliaceae        | <i>Carapa</i>      | <i>Carapa procera</i>           | JF288754 |
| Eudicotyledons | Meliaceae        | <i>Carapa</i>      | <i>Carapa surinamensis</i>      | JN122307 |
| Eudicotyledons | Meliaceae        | <i>Carapa</i>      | <i>Carapa surinamensis</i>      | JN122308 |
| Eudicotyledons | Meliaceae        | <i>Carapa</i>      | <i>Carapa surinamensis</i>      | JN122309 |
| Eudicotyledons | Meliaceae        | <i>Carapa</i>      | <i>Carapa surinamensis</i>      | JN122310 |
| Eudicotyledons | Meliaceae        | <i>Carapa</i>      | <i>Carapa surinamensis</i>      | JN122311 |
| Eudicotyledons | Lamiaceae        | <i>Teucrium</i>    | <i>Teucrium viscidum</i>        | FJ513102 |
| Eudicotyledons | Lamiaceae        | <i>Teucrium</i>    | <i>Teucrium viscidum</i>        | HM590116 |
| Eudicotyledons | Asteraceae       | <i>Cota</i>        | <i>Cota pestalozzae</i>         | FR689835 |
| Eudicotyledons | Asteraceae       | <i>Cota</i>        | <i>Cota pestalozzae</i>         | FR689877 |
| Eudicotyledons | Apocynaceae      | <i>Hoodia</i>      | <i>Hoodia parviflora</i>        | FJ026608 |
| Eudicotyledons | Apocynaceae      | <i>Hoodia</i>      | <i>Hoodia parviflora</i>        | FJ026609 |
| Eudicotyledons | Apocynaceae      | <i>Hoodia</i>      | <i>Hoodia parviflora</i>        | JN117264 |
| Eudicotyledons | Apocynaceae      | <i>Hoodia</i>      | <i>Hoodia ruschii</i>           | FJ026610 |
| Eudicotyledons | Apocynaceae      | <i>Hoodia</i>      | <i>Hoodia ruschii</i>           | FJ026611 |
| Eudicotyledons | Apocynaceae      | <i>Hoodia</i>      | <i>Hoodia ruschii</i>           | JN117265 |
| Eudicotyledons | Chrysobalanaceae | <i>Licania</i>     | <i>Licania alba</i>             | GQ428727 |
| Eudicotyledons | Chrysobalanaceae | <i>Licania</i>     | <i>Licania alba</i>             | FJ038897 |
| Eudicotyledons | Chrysobalanaceae | <i>Licania</i>     | <i>Licania alba</i>             | FJ038898 |
| Eudicotyledons | Chrysobalanaceae | <i>Licania</i>     | <i>Licania canescens</i>        | FJ038899 |
| Eudicotyledons | Chrysobalanaceae | <i>Licania</i>     | <i>Licania canescens</i>        | FJ038900 |
| Eudicotyledons | Chrysobalanaceae | <i>Licania</i>     | <i>Licania canescens</i>        | FJ038901 |
| Eudicotyledons | Chrysobalanaceae | <i>Licania</i>     | <i>Licania majuscula</i>        | FJ038902 |
| Eudicotyledons | Chrysobalanaceae | <i>Licania</i>     | <i>Licania majuscula</i>        | FJ038903 |
| Eudicotyledons | Chrysobalanaceae | <i>Licania</i>     | <i>Licania membranacea</i>      | GQ428772 |
| Eudicotyledons | Chrysobalanaceae | <i>Licania</i>     | <i>Licania membranacea</i>      | FJ038904 |
| Eudicotyledons | Sapotaceae       | <i>Micropholis</i> | <i>Micropholis cayennensis</i>  | GQ428707 |
| Eudicotyledons | Sapotaceae       | <i>Micropholis</i> | <i>Micropholis cayennensis</i>  | FJ039062 |
| Eudicotyledons | Sapotaceae       | <i>Micropholis</i> | <i>Micropholis cayennensis</i>  | FJ039063 |
| Eudicotyledons | Asteraceae       | <i>Melampodium</i> | <i>Melampodium argophyllum</i>  | FJ845873 |
| Eudicotyledons | Asteraceae       | <i>Melampodium</i> | <i>Melampodium argophyllum</i>  | FJ845874 |
| Eudicotyledons | Asteraceae       | <i>Melampodium</i> | <i>Melampodium argophyllum</i>  | FJ845875 |
| Eudicotyledons | Asteraceae       | <i>Melampodium</i> | <i>Melampodium argophyllum</i>  | FJ845876 |
| Eudicotyledons | Asteraceae       | <i>Melampodium</i> | <i>Melampodium argophyllum</i>  | FJ845877 |
| Eudicotyledons | Asteraceae       | <i>Melampodium</i> | <i>Melampodium argophyllum</i>  | FJ845878 |
| Eudicotyledons | Asteraceae       | <i>Melampodium</i> | <i>Melampodium cupulatum</i>    | GU216580 |
| Eudicotyledons | Asteraceae       | <i>Melampodium</i> | <i>Melampodium cupulatum</i>    | GU216581 |
| Eudicotyledons | Asteraceae       | <i>Melampodium</i> | <i>Melampodium diffusum</i>     | GU216554 |
| Eudicotyledons | Asteraceae       | <i>Melampodium</i> | <i>Melampodium diffusum</i>     | GU216555 |
| Eudicotyledons | Asteraceae       | <i>Melampodium</i> | <i>Melampodium linearilobum</i> | GU216574 |
| Eudicotyledons | Asteraceae       | <i>Melampodium</i> | <i>Melampodium linearilobum</i> | GU216575 |
| Eudicotyledons | Asteraceae       | <i>Melampodium</i> | <i>Melampodium longicorne</i>   | GU216569 |
| Eudicotyledons | Asteraceae       | <i>Melampodium</i> | <i>Melampodium longicorne</i>   | GU216570 |
| Eudicotyledons | Asteraceae       | <i>Melampodium</i> | <i>Melampodium longipes</i>     | GU216560 |
| Eudicotyledons | Asteraceae       | <i>Melampodium</i> | <i>Melampodium longipes</i>     | GU216561 |
| Eudicotyledons | Asteraceae       | <i>Melampodium</i> | <i>Melampodium mayfieldii</i>   | GU216563 |
| Eudicotyledons | Asteraceae       | <i>Melampodium</i> | <i>Melampodium mayfieldii</i>   | GU216564 |
| Eudicotyledons | Asteraceae       | <i>Melampodium</i> | <i>Melampodium nayaritense</i>  | GU216571 |
| Eudicotyledons | Asteraceae       | <i>Melampodium</i> | <i>Melampodium nayaritense</i>  | GU216572 |
| Eudicotyledons | Asteraceae       | <i>Melampodium</i> | <i>Melampodium nayaritense</i>  | GU216573 |

|                |            |                    |                                |          |
|----------------|------------|--------------------|--------------------------------|----------|
| Eudicotyledons | Asteraceae | <i>Melampodium</i> | <i>Melampodium rosei</i>       | GU216582 |
| Eudicotyledons | Asteraceae | <i>Melampodium</i> | <i>Melampodium rosei</i>       | GU216583 |
| Eudicotyledons | Asteraceae | <i>Melampodium</i> | <i>Melampodium strigosum</i>   | GU216567 |
| Eudicotyledons | Asteraceae | <i>Melampodium</i> | <i>Melampodium strigosum</i>   | GU216568 |
| Eudicotyledons | Asteraceae | <i>Melampodium</i> | <i>Melampodium tenellum</i>    | GU216577 |
| Eudicotyledons | Asteraceae | <i>Melampodium</i> | <i>Melampodium tenellum</i>    | GU216578 |
| Eudicotyledons | Solanaceae | <i>Nolana</i>      | <i>Nolana gracillima</i>       | FJ914088 |
| Eudicotyledons | Solanaceae | <i>Nolana</i>      | <i>Nolana gracillima</i>       | FJ914092 |
| Eudicotyledons | Solanaceae | <i>Nolana</i>      | <i>Nolana pallidula</i>        | FJ914069 |
| Eudicotyledons | Solanaceae | <i>Nolana</i>      | <i>Nolana pallidula</i>        | FJ914076 |
| Eudicotyledons | Solanaceae | <i>Nolana</i>      | <i>Nolana tovariana</i>        | FJ914071 |
| Eudicotyledons | Solanaceae | <i>Nolana</i>      | <i>Nolana tovariana</i>        | FJ914075 |
| Eudicotyledons | Solanaceae | <i>Nolana</i>      | <i>Nolana tovariana</i>        | FJ914077 |
| Eudicotyledons | Solanaceae | <i>Nolana</i>      | <i>Nolana tovariana</i>        | FJ914080 |
| Eudicotyledons | Solanaceae | <i>Nolana</i>      | <i>Nolana tovariana</i>        | FJ914081 |
| Eudicotyledons | Fabaceae   | <i>Astragalus</i>  | <i>Astragalus membranaceus</i> | GU396752 |
| Eudicotyledons | Fabaceae   | <i>Astragalus</i>  | <i>Astragalus membranaceus</i> | GU396753 |
| Eudicotyledons | Fabaceae   | <i>Astragalus</i>  | <i>Astragalus membranaceus</i> | GQ139475 |
| Eudicotyledons | Fabaceae   | <i>Astragalus</i>  | <i>Astragalus membranaceus</i> | GQ139476 |
| Eudicotyledons | Fabaceae   | <i>Astragalus</i>  | <i>Astragalus membranaceus</i> | GQ139477 |
| Eudicotyledons | Fabaceae   | <i>Astragalus</i>  | <i>Astragalus membranaceus</i> | GQ139478 |
| Eudicotyledons | Fabaceae   | <i>Astragalus</i>  | <i>Astragalus membranaceus</i> | GQ139479 |
| Eudicotyledons | Fabaceae   | <i>Astragalus</i>  | <i>Astragalus membranaceus</i> | GQ139480 |
| Eudicotyledons | Fabaceae   | <i>Astragalus</i>  | <i>Astragalus membranaceus</i> | GQ139481 |
| Eudicotyledons | Fabaceae   | <i>Astragalus</i>  | <i>Astragalus membranaceus</i> | GQ139482 |
| Eudicotyledons | Fabaceae   | <i>Astragalus</i>  | <i>Astragalus membranaceus</i> | GQ139483 |
| Eudicotyledons | Rosaceae   | <i>Potentilla</i>  | <i>Potentilla neumaniana</i>   | GQ384967 |
| Eudicotyledons | Rosaceae   | <i>Potentilla</i>  | <i>Potentilla neumaniana</i>   | GQ384973 |
| Eudicotyledons | Rosaceae   | <i>Potentilla</i>  | <i>Potentilla argentea</i>     | GQ384965 |
| Eudicotyledons | Rosaceae   | <i>Potentilla</i>  | <i>Potentilla argentea</i>     | GQ384977 |
| Eudicotyledons | Rosaceae   | <i>Potentilla</i>  | <i>Potentilla argentea</i>     | GQ384986 |
| Eudicotyledons | Rosaceae   | <i>Potentilla</i>  | <i>Potentilla argentea</i>     | HM776523 |
| Eudicotyledons | Rosaceae   | <i>Potentilla</i>  | <i>Potentilla argentea</i>     | HM776524 |
| Eudicotyledons | Rosaceae   | <i>Potentilla</i>  | <i>Potentilla argentea</i>     | HM776525 |
| Eudicotyledons | Rosaceae   | <i>Potentilla</i>  | <i>Potentilla argentea</i>     | HM776526 |
| Eudicotyledons | Rosaceae   | <i>Potentilla</i>  | <i>Potentilla argentea</i>     | HM776527 |
| Eudicotyledons | Rosaceae   | <i>Potentilla</i>  | <i>Potentilla argentea</i>     | HM776528 |
| Eudicotyledons | Rosaceae   | <i>Potentilla</i>  | <i>Potentilla argentea</i>     | HM776529 |
| Eudicotyledons | Rosaceae   | <i>Potentilla</i>  | <i>Potentilla argentea</i>     | HM776530 |
| Eudicotyledons | Rosaceae   | <i>Potentilla</i>  | <i>Potentilla argentea</i>     | HM776531 |
| Eudicotyledons | Rosaceae   | <i>Potentilla</i>  | <i>Potentilla argentea</i>     | HM776532 |
| Eudicotyledons | Rosaceae   | <i>Potentilla</i>  | <i>Potentilla argentea</i>     | HM776533 |
| Eudicotyledons | Rosaceae   | <i>Potentilla</i>  | <i>Potentilla argentea</i>     | HM776534 |
| Eudicotyledons | Rosaceae   | <i>Potentilla</i>  | <i>Potentilla argentea</i>     | HM776535 |
| Eudicotyledons | Rosaceae   | <i>Potentilla</i>  | <i>Potentilla argentea</i>     | HM776536 |
| Eudicotyledons | Rosaceae   | <i>Potentilla</i>  | <i>Potentilla argentea</i>     | HM776537 |
| Eudicotyledons | Rosaceae   | <i>Potentilla</i>  | <i>Potentilla argentea</i>     | HM776538 |
| Eudicotyledons | Rosaceae   | <i>Potentilla</i>  | <i>Potentilla argentea</i>     | HM776539 |
| Eudicotyledons | Rosaceae   | <i>Potentilla</i>  | <i>Potentilla argentea</i>     | HM776540 |
| Eudicotyledons | Rosaceae   | <i>Potentilla</i>  | <i>Potentilla argentea</i>     | HM776541 |
| Eudicotyledons | Rosaceae   | <i>Potentilla</i>  | <i>Potentilla argentea</i>     | HM776542 |
| Eudicotyledons | Rosaceae   | <i>Potentilla</i>  | <i>Potentilla argentea</i>     | HM776543 |
| Eudicotyledons | Rosaceae   | <i>Potentilla</i>  | <i>Potentilla argentea</i>     | HM776544 |



|                |               |                    |                                  |          |
|----------------|---------------|--------------------|----------------------------------|----------|
| Eudicotyledons | Berberidaceae | <i>Berberis</i>    | <i>Berberis lycium</i>           | GU934969 |
| Eudicotyledons | Berberidaceae | <i>Berberis</i>    | <i>Berberis lycium</i>           | GU934970 |
| Eudicotyledons | Berberidaceae | <i>Berberis</i>    | <i>Berberis lycium</i>           | GU934971 |
| Eudicotyledons | Berberidaceae | <i>Berberis</i>    | <i>Berberis lycium</i>           | GU934972 |
| Eudicotyledons | Rosaceae      | <i>Aronia</i>      | <i>Aronia melanocarpa</i>        | JQ390631 |
| Eudicotyledons | Rosaceae      | <i>Aronia</i>      | <i>Aronia melanocarpa</i>        | GQ305340 |
| Eudicotyledons | Rosaceae      | <i>Photinia</i>    | <i>Photinia prunifolia</i>       | HQ415532 |
| Eudicotyledons | Rosaceae      | <i>Photinia</i>    | <i>Photinia prunifolia</i>       | GQ305342 |
| Eudicotyledons | Rosaceae      | <i>Photinia</i>    | <i>Photinia raupingensis</i>     | GQ305341 |
| Eudicotyledons | Rosaceae      | <i>Photinia</i>    | <i>Photinia raupingensis</i>     | GQ305355 |
| Eudicotyledons | Lamiaceae     | <i>Isodon</i>      | <i>Isodon bulleyanus</i>         | JN045032 |
| Eudicotyledons | Lamiaceae     | <i>Isodon</i>      | <i>Isodon bulleyanus</i>         | JN045033 |
| Eudicotyledons | Lamiaceae     | <i>Isodon</i>      | <i>Isodon bulleyanus</i>         | JN045034 |
| Eudicotyledons | Lamiaceae     | <i>Isodon</i>      | <i>Isodon flabelliformis</i>     | JN045035 |
| Eudicotyledons | Lamiaceae     | <i>Isodon</i>      | <i>Isodon flabelliformis</i>     | JN045036 |
| Eudicotyledons | Lamiaceae     | <i>Isodon</i>      | <i>Isodon loxothyrsus</i>        | JN045039 |
| Eudicotyledons | Lamiaceae     | <i>Isodon</i>      | <i>Isodon loxothyrsus</i>        | JN045040 |
| Eudicotyledons | Lamiaceae     | <i>Isodon</i>      | <i>Isodon melissoides</i>        | JN045041 |
| Eudicotyledons | Lamiaceae     | <i>Isodon</i>      | <i>Isodon melissoides</i>        | JN045042 |
| Eudicotyledons | Lamiaceae     | <i>Isodon</i>      | <i>Isodon sculponeatus</i>       | JN045043 |
| Eudicotyledons | Lamiaceae     | <i>Isodon</i>      | <i>Isodon sculponeatus</i>       | JN045044 |
| Eudicotyledons | Lamiaceae     | <i>Isodon</i>      | <i>Isodon yuennanensis</i>       | JN045045 |
| Eudicotyledons | Lamiaceae     | <i>Isodon</i>      | <i>Isodon yuennanensis</i>       | JN045046 |
| Eudicotyledons | Moraceae      | <i>Ficus</i>       | <i>Ficus esquiroliana</i>        | HQ415502 |
| Eudicotyledons | Moraceae      | <i>Ficus</i>       | <i>Ficus esquiroliana</i>        | JN044516 |
| Eudicotyledons | Moraceae      | <i>Ficus</i>       | <i>Ficus esquiroliana</i>        | JN044517 |
| Eudicotyledons | Rosaceae      | <i>Potentilla</i>  | <i>Potentilla alpicola</i>       | HQ433263 |
| Eudicotyledons | Rosaceae      | <i>Potentilla</i>  | <i>Potentilla alpicola</i>       | GQ384980 |
| Eudicotyledons | Rosaceae      | <i>Potentilla</i>  | <i>Potentilla incana</i>         | GQ384971 |
| Eudicotyledons | Rosaceae      | <i>Potentilla</i>  | <i>Potentilla incana</i>         | GQ384972 |
| Eudicotyledons | Rosaceae      | <i>Potentilla</i>  | <i>Potentilla pulcherrima</i>    | GQ384995 |
| Eudicotyledons | Rosaceae      | <i>Potentilla</i>  | <i>Potentilla pulcherrima</i>    | GQ385014 |
| Eudicotyledons | Rosaceae      | <i>Potentilla</i>  | <i>Potentilla velutina</i>       | GQ384966 |
| Eudicotyledons | Rosaceae      | <i>Potentilla</i>  | <i>Potentilla velutina</i>       | GQ384969 |
| Eudicotyledons | Lamiaceae     | <i>Isodon</i>      | <i>Isodon effusus</i>            | AB556806 |
| Eudicotyledons | Lamiaceae     | <i>Isodon</i>      | <i>Isodon effusus</i>            | AB556808 |
| Eudicotyledons | Gentianaceae  | <i>Gentiana</i>    | <i>Gentiana manshurica</i>       | GQ864029 |
| Eudicotyledons | Gentianaceae  | <i>Gentiana</i>    | <i>Gentiana manshurica</i>       | GQ864030 |
| Eudicotyledons | Betulaceae    | <i>Alnus</i>       | <i>Alnus fauriei</i>             | FJ844516 |
| Eudicotyledons | Betulaceae    | <i>Alnus</i>       | <i>Alnus fauriei</i>             | FJ844517 |
| Eudicotyledons | Betulaceae    | <i>Alnus</i>       | <i>Alnus serrulatoides</i>       | FJ844553 |
| Eudicotyledons | Betulaceae    | <i>Alnus</i>       | <i>Alnus serrulatoides</i>       | FJ844554 |
| Eudicotyledons | Sapotaceae    | <i>Micropholis</i> | <i>Micropholis sanctae-rosae</i> | GQ428710 |
| Eudicotyledons | Sapotaceae    | <i>Micropholis</i> | <i>Micropholis sanctae-rosae</i> | GQ428711 |
| Eudicotyledons | Nothofagaceae | <i>Nothofagus</i>  | <i>Nothofagus nervosa</i>        | GQ863327 |
| Eudicotyledons | Nothofagaceae | <i>Nothofagus</i>  | <i>Nothofagus nervosa</i>        | GQ863330 |
| Eudicotyledons | Cucurbitaceae | <i>Thladiantha</i> | <i>Thladiantha cordifolia</i>    | GQ163094 |
| Eudicotyledons | Cucurbitaceae | <i>Thladiantha</i> | <i>Thladiantha cordifolia</i>    | JN047372 |
| Eudicotyledons | Cucurbitaceae | <i>Thladiantha</i> | <i>Thladiantha cordifolia</i>    | JN047373 |
| Eudicotyledons | Cucurbitaceae | <i>Thladiantha</i> | <i>Thladiantha cordifolia</i>    | JN047374 |
| Eudicotyledons | Cucurbitaceae | <i>Thladiantha</i> | <i>Thladiantha cordifolia</i>    | JN047375 |
| Eudicotyledons | Cucurbitaceae | <i>Thladiantha</i> | <i>Thladiantha cordifolia</i>    | JN047376 |
| Eudicotyledons | Cucurbitaceae | <i>Thladiantha</i> | <i>Thladiantha cordifolia</i>    | JN047377 |

|                |               |                    |                               |          |
|----------------|---------------|--------------------|-------------------------------|----------|
| Eudicotyledons | Cucurbitaceae | <i>Thladiantha</i> | <i>Thladiantha cordifolia</i> | JN047378 |
| Eudicotyledons | Cucurbitaceae | <i>Thladiantha</i> | <i>Thladiantha cordifolia</i> | JN047379 |
| Eudicotyledons | Cucurbitaceae | <i>Thladiantha</i> | <i>Thladiantha cordifolia</i> | JN047380 |
| Eudicotyledons | Cucurbitaceae | <i>Thladiantha</i> | <i>Thladiantha cordifolia</i> | JN047381 |
| Eudicotyledons | Cucurbitaceae | <i>Thladiantha</i> | <i>Thladiantha cordifolia</i> | JN047382 |
| Eudicotyledons | Cucurbitaceae | <i>Thladiantha</i> | <i>Thladiantha cordifolia</i> | JN047383 |
| Eudicotyledons | Cucurbitaceae | <i>Thladiantha</i> | <i>Thladiantha nudiflora</i>  | GQ163095 |
| Eudicotyledons | Cucurbitaceae | <i>Thladiantha</i> | <i>Thladiantha nudiflora</i>  | JN047429 |
| Eudicotyledons | Cucurbitaceae | <i>Thladiantha</i> | <i>Thladiantha nudiflora</i>  | JN047430 |
| Eudicotyledons | Cucurbitaceae | <i>Thladiantha</i> | <i>Thladiantha nudiflora</i>  | JN047431 |
| Eudicotyledons | Cucurbitaceae | <i>Thladiantha</i> | <i>Thladiantha nudiflora</i>  | JN047432 |
| Eudicotyledons | Cucurbitaceae | <i>Thladiantha</i> | <i>Thladiantha nudiflora</i>  | JN047433 |
| Eudicotyledons | Cucurbitaceae | <i>Thladiantha</i> | <i>Thladiantha nudiflora</i>  | JN047434 |
| Eudicotyledons | Cucurbitaceae | <i>Thladiantha</i> | <i>Thladiantha nudiflora</i>  | JN047435 |
| Eudicotyledons | Cucurbitaceae | <i>Thladiantha</i> | <i>Thladiantha nudiflora</i>  | JN047436 |
| Eudicotyledons | Cucurbitaceae | <i>Thladiantha</i> | <i>Thladiantha nudiflora</i>  | JN047437 |
| Eudicotyledons | Cucurbitaceae | <i>Thladiantha</i> | <i>Thladiantha nudiflora</i>  | JN047438 |
| Eudicotyledons | Rosaceae      | <i>Sorbaria</i>    | <i>Sorbaria kirilowii</i>     | JN047238 |
| Eudicotyledons | Rosaceae      | <i>Sorbaria</i>    | <i>Sorbaria kirilowii</i>     | JN047239 |
| Eudicotyledons | Berberidaceae | <i>Berberis</i>    | <i>Berberis angulosa</i>      | GU934914 |
| Eudicotyledons | Berberidaceae | <i>Berberis</i>    | <i>Berberis angulosa</i>      | GU934915 |
| Eudicotyledons | Berberidaceae | <i>Berberis</i>    | <i>Berberis angulosa</i>      | GU934916 |
| Eudicotyledons | Berberidaceae | <i>Berberis</i>    | <i>Berberis glaucocarpa</i>   | GU934938 |
| Eudicotyledons | Berberidaceae | <i>Berberis</i>    | <i>Berberis glaucocarpa</i>   | GU934939 |
| Eudicotyledons | Berberidaceae | <i>Berberis</i>    | <i>Berberis glaucocarpa</i>   | GU934940 |
| Eudicotyledons | Berberidaceae | <i>Berberis</i>    | <i>Berberis glaucocarpa</i>   | GU934941 |
| Eudicotyledons | Berberidaceae | <i>Berberis</i>    | <i>Berberis glaucocarpa</i>   | GU934942 |
| Eudicotyledons | Berberidaceae | <i>Berberis</i>    | <i>Berberis glaucocarpa</i>   | GU934943 |
| Eudicotyledons | Berberidaceae | <i>Berberis</i>    | <i>Berberis glaucocarpa</i>   | GU934944 |
| Eudicotyledons | Berberidaceae | <i>Berberis</i>    | <i>Berberis glaucocarpa</i>   | GU934945 |
| Eudicotyledons | Berberidaceae | <i>Berberis</i>    | <i>Berberis hainesii</i>      | GU934946 |
| Eudicotyledons | Berberidaceae | <i>Berberis</i>    | <i>Berberis hainesii</i>      | GU934947 |
| Eudicotyledons | Berberidaceae | <i>Berberis</i>    | <i>Berberis hainesii</i>      | GU934948 |
| Eudicotyledons | Berberidaceae | <i>Berberis</i>    | <i>Berberis hainesii</i>      | GU934949 |
| Eudicotyledons | Berberidaceae | <i>Berberis</i>    | <i>Berberis hainesii</i>      | GU934950 |
| Eudicotyledons | Berberidaceae | <i>Berberis</i>    | <i>Berberis jaeschkeana</i>   | GU934953 |
| Eudicotyledons | Berberidaceae | <i>Berberis</i>    | <i>Berberis jaeschkeana</i>   | GU934954 |
| Eudicotyledons | Berberidaceae | <i>Berberis</i>    | <i>Berberis jaeschkeana</i>   | GU934955 |
| Eudicotyledons | Berberidaceae | <i>Berberis</i>    | <i>Berberis jaeschkeana</i>   | GU934956 |
| Eudicotyledons | Berberidaceae | <i>Berberis</i>    | <i>Berberis pachyacantha</i>  | GU934973 |
| Eudicotyledons | Berberidaceae | <i>Berberis</i>    | <i>Berberis pachyacantha</i>  | GU934974 |
| Eudicotyledons | Berberidaceae | <i>Berberis</i>    | <i>Berberis pachyacantha</i>  | GU934975 |
| Eudicotyledons | Berberidaceae | <i>Berberis</i>    | <i>Berberis pachyacantha</i>  | GU934976 |
| Eudicotyledons | Berberidaceae | <i>Berberis</i>    | <i>Berberis replicata</i>     | GU934977 |
| Eudicotyledons | Berberidaceae | <i>Berberis</i>    | <i>Berberis replicata</i>     | GU934978 |
| Eudicotyledons | Berberidaceae | <i>Berberis</i>    | <i>Berberis replicata</i>     | GU934979 |
| Eudicotyledons | Berberidaceae | <i>Berberis</i>    | <i>Berberis replicata</i>     | GU934980 |
| Eudicotyledons | Berberidaceae | <i>Berberis</i>    | <i>Berberis replicata</i>     | GU934981 |
| Eudicotyledons | Berberidaceae | <i>Berberis</i>    | <i>Berberis replicata</i>     | GU934982 |
| Eudicotyledons | Berberidaceae | <i>Berberis</i>    | <i>Berberis tinctoria</i>     | GU934983 |
| Eudicotyledons | Berberidaceae | <i>Berberis</i>    | <i>Berberis tinctoria</i>     | GU934984 |
| Eudicotyledons | Berberidaceae | <i>Berberis</i>    | <i>Berberis tinctoria</i>     | GU934985 |
| Eudicotyledons | Berberidaceae | <i>Berberis</i>    | <i>Berberis tinctoria</i>     | GU934986 |

|                |                |                    |                                          |          |
|----------------|----------------|--------------------|------------------------------------------|----------|
| Eudicotyledons | Berberidaceae  | <i>Berberis</i>    | <i>Berberis tinctoria</i>                | GU934987 |
| Eudicotyledons | Berberidaceae  | <i>Berberis</i>    | <i>Berberis tinctoria</i>                | GU934988 |
| Eudicotyledons | Berberidaceae  | <i>Berberis</i>    | <i>Berberis tinctoria</i>                | GU934989 |
| Eudicotyledons | Berberidaceae  | <i>Berberis</i>    | <i>Berberis tinctoria</i>                | GU934990 |
| Eudicotyledons | Berberidaceae  | <i>Berberis</i>    | <i>Berberis umbellata</i>                | GU934991 |
| Eudicotyledons | Berberidaceae  | <i>Berberis</i>    | <i>Berberis umbellata</i>                | GU934992 |
| Eudicotyledons | Berberidaceae  | <i>Berberis</i>    | <i>Berberis umbellata</i>                | GU934993 |
| Eudicotyledons | Berberidaceae  | <i>Berberis</i>    | <i>Berberis wightiana</i>                | GU934994 |
| Eudicotyledons | Berberidaceae  | <i>Berberis</i>    | <i>Berberis wightiana</i>                | GU934995 |
| Eudicotyledons | Berberidaceae  | <i>Berberis</i>    | <i>Berberis wightiana</i>                | GU934996 |
| Eudicotyledons | Moraceae       | <i>Ficus</i>       | <i>Ficus retusa</i>                      | GU935111 |
| Eudicotyledons | Moraceae       | <i>Ficus</i>       | <i>Ficus retusa</i>                      | GU935112 |
| Eudicotyledons | Fabaceae       | <i>Schotia</i>     | <i>Schotia aff. latifolia SR-2010</i>    | GQ405103 |
| Eudicotyledons | Fabaceae       | <i>Schotia</i>     | <i>Schotia aff. latifolia SR-2010</i>    | GQ405104 |
| Eudicotyledons | Fabaceae       | <i>Schotia</i>     | <i>Schotia aff. latifolia SR-2010</i>    | GQ405122 |
| Eudicotyledons | Fabaceae       | <i>Schotia</i>     | <i>Schotia aff. latifolia SR-2010</i>    | GQ405133 |
| Eudicotyledons | Fabaceae       | <i>Schotia</i>     | <i>Schotia aff. brachypetala SR-2010</i> | GQ405108 |
| Eudicotyledons | Fabaceae       | <i>Schotia</i>     | <i>Schotia aff. brachypetala SR-2010</i> | GQ405130 |
| Eudicotyledons | Fabaceae       | <i>Schotia</i>     | <i>Schotia latifolia x Schotia afra</i>  | GQ405125 |
| Eudicotyledons | Fabaceae       | <i>Schotia</i>     | <i>Schotia latifolia x Schotia afra</i>  | GQ405134 |
| Eudicotyledons | Fabaceae       | <i>Schotia</i>     | <i>Schotia latifolia x Schotia afra</i>  | GQ405135 |
| Eudicotyledons | Hydrangeaceae  | <i>Hydrangea</i>   | <i>Hydrangea heteromalla</i>             | JN044926 |
| Eudicotyledons | Hydrangeaceae  | <i>Hydrangea</i>   | <i>Hydrangea heteromalla</i>             | JN044927 |
| Eudicotyledons | Hydrangeaceae  | <i>Hydrangea</i>   | <i>Hydrangea heteromalla</i>             | HM216975 |
| Eudicotyledons | Cucurbitaceae  | <i>Thladiantha</i> | <i>Thladiantha lijiangensis</i>          | JN047408 |
| Eudicotyledons | Cucurbitaceae  | <i>Thladiantha</i> | <i>Thladiantha lijiangensis</i>          | JN047409 |
| Eudicotyledons | Cucurbitaceae  | <i>Thladiantha</i> | <i>Thladiantha lijiangensis</i>          | JN047410 |
| Eudicotyledons | Cucurbitaceae  | <i>Thladiantha</i> | <i>Thladiantha lijiangensis</i>          | JN047411 |
| Eudicotyledons | Cucurbitaceae  | <i>Thladiantha</i> | <i>Thladiantha lijiangensis</i>          | JN047412 |
| Eudicotyledons | Cucurbitaceae  | <i>Thladiantha</i> | <i>Thladiantha lijiangensis</i>          | JN047413 |
| Eudicotyledons | Cucurbitaceae  | <i>Thladiantha</i> | <i>Thladiantha lijiangensis</i>          | JN047414 |
| Eudicotyledons | Rosaceae       | <i>Potentilla</i>  | <i>Potentilla calabra</i>                | HM776569 |
| Eudicotyledons | Rosaceae       | <i>Potentilla</i>  | <i>Potentilla calabra</i>                | HM776570 |
| Eudicotyledons | Rosaceae       | <i>Potentilla</i>  | <i>Potentilla calabra</i>                | HM776571 |
| Eudicotyledons | Asteraceae     | <i>Senecio</i>     | <i>Senecio cadiscus</i>                  | GU818346 |
| Eudicotyledons | Asteraceae     | <i>Senecio</i>     | <i>Senecio cadiscus</i>                  | GU818347 |
| Eudicotyledons | Lamiaceae      | <i>Mentha</i>      | <i>Mentha sp. MIB zpl</i>                | FR726103 |
| Eudicotyledons | Lamiaceae      | <i>Mentha</i>      | <i>Mentha sp. MIB zpl</i>                | FR726104 |
| Eudicotyledons | Lamiaceae      | <i>Mentha</i>      | <i>Mentha sp. MIB zpl</i>                | FR726105 |
| Eudicotyledons | Lamiaceae      | <i>Salvia</i>      | <i>Salvia sp. MIB zpl</i>                | FR726145 |
| Eudicotyledons | Lamiaceae      | <i>Salvia</i>      | <i>Salvia sp. MIB zpl</i>                | FR726146 |
| Eudicotyledons | Lamiaceae      | <i>Salvia</i>      | <i>Salvia sp. MIB zpl</i>                | FR726147 |
| Eudicotyledons | Solanaceae     | <i>Lycium</i>      | <i>Lycium truncatum</i>                  | HM195015 |
| Eudicotyledons | Solanaceae     | <i>Lycium</i>      | <i>Lycium truncatum</i>                  | HM195016 |
| Eudicotyledons | Solanaceae     | <i>Lycium</i>      | <i>Lycium yunnanense</i>                 | HM195018 |
| Eudicotyledons | Solanaceae     | <i>Lycium</i>      | <i>Lycium yunnanense</i>                 | HM195019 |
| Eudicotyledons | Hydrangeaceae  | <i>Hydrangea</i>   | <i>Hydrangea bretschneideri</i>          | HM216969 |
| Eudicotyledons | Hydrangeaceae  | <i>Hydrangea</i>   | <i>Hydrangea bretschneideri</i>          | JF321261 |
| Eudicotyledons | Lamiaceae      | <i>Teucrium</i>    | <i>Teucrium montanum</i>                 | FR865074 |
| Eudicotyledons | Lamiaceae      | <i>Teucrium</i>    | <i>Teucrium montanum</i>                 | HQ902877 |
| Eudicotyledons | Elaeocarpaceae | <i>Elaeocarpus</i> | <i>Elaeocarpus decipiens</i>             | HQ415428 |
| Eudicotyledons | Elaeocarpaceae | <i>Elaeocarpus</i> | <i>Elaeocarpus decipiens</i>             | HQ426998 |
| Eudicotyledons | Elaeocarpaceae | <i>Elaeocarpus</i> | <i>Elaeocarpus japonicus</i>             | HQ415431 |

|                |                |                    |                                 |          |
|----------------|----------------|--------------------|---------------------------------|----------|
| Eudicotyledons | Elaeocarpaceae | <i>Elaeocarpus</i> | <i>Elaeocarpus japonicus</i>    | HQ426999 |
| Eudicotyledons | Moraceae       | <i>Ficus</i>       | <i>Ficus variolosa</i>          | HQ415501 |
| Eudicotyledons | Moraceae       | <i>Ficus</i>       | <i>Ficus variolosa</i>          | JN044545 |
| Eudicotyledons | Moraceae       | <i>Ficus</i>       | <i>Ficus variolosa</i>          | JN044546 |
| Eudicotyledons | Moraceae       | <i>Ficus</i>       | <i>Ficus variolosa</i>          | JN044547 |
| Eudicotyledons | Loranthaceae   | <i>Macrosolen</i>  | <i>Macrosolen tricolor</i>      | HQ317812 |
| Eudicotyledons | Loranthaceae   | <i>Macrosolen</i>  | <i>Macrosolen tricolor</i>      | HQ317813 |
| Eudicotyledons | Loranthaceae   | <i>Taxillus</i>    | <i>Taxillus limprichtii</i>     | HQ317832 |
| Eudicotyledons | Loranthaceae   | <i>Taxillus</i>    | <i>Taxillus limprichtii</i>     | HQ317833 |
| Eudicotyledons | Loranthaceae   | <i>Taxillus</i>    | <i>Taxillus limprichtii</i>     | HQ317834 |
| Eudicotyledons | Loranthaceae   | <i>Taxillus</i>    | <i>Taxillus nigrans</i>         | HQ317835 |
| Eudicotyledons | Loranthaceae   | <i>Taxillus</i>    | <i>Taxillus nigrans</i>         | HQ317836 |
| Eudicotyledons | Hydrangeaceae  | <i>Hydrangea</i>   | <i>Hydrangea davidii</i>        | JN044924 |
| Eudicotyledons | Hydrangeaceae  | <i>Hydrangea</i>   | <i>Hydrangea davidii</i>        | JN044925 |
| Eudicotyledons | Hydrangeaceae  | <i>Hydrangea</i>   | <i>Hydrangea davidii</i>        | HM216974 |
| Eudicotyledons | Cucurbitaceae  | <i>Thladiantha</i> | <i>Thladiantha capitata</i>     | JN047367 |
| Eudicotyledons | Cucurbitaceae  | <i>Thladiantha</i> | <i>Thladiantha capitata</i>     | JN047368 |
| Eudicotyledons | Cucurbitaceae  | <i>Thladiantha</i> | <i>Thladiantha capitata</i>     | JN047369 |
| Eudicotyledons | Cucurbitaceae  | <i>Thladiantha</i> | <i>Thladiantha capitata</i>     | JN047370 |
| Eudicotyledons | Cucurbitaceae  | <i>Thladiantha</i> | <i>Thladiantha capitata</i>     | JN047371 |
| Eudicotyledons | Cucurbitaceae  | <i>Thladiantha</i> | <i>Thladiantha dentata</i>      | JN047388 |
| Eudicotyledons | Cucurbitaceae  | <i>Thladiantha</i> | <i>Thladiantha dentata</i>      | JN047389 |
| Eudicotyledons | Cucurbitaceae  | <i>Thladiantha</i> | <i>Thladiantha dentata</i>      | JN047390 |
| Eudicotyledons | Cucurbitaceae  | <i>Thladiantha</i> | <i>Thladiantha dentata</i>      | JN047391 |
| Eudicotyledons | Cucurbitaceae  | <i>Thladiantha</i> | <i>Thladiantha grandisepala</i> | JN047392 |
| Eudicotyledons | Cucurbitaceae  | <i>Thladiantha</i> | <i>Thladiantha grandisepala</i> | JN047393 |
| Eudicotyledons | Cucurbitaceae  | <i>Thladiantha</i> | <i>Thladiantha grandisepala</i> | JN047394 |
| Eudicotyledons | Cucurbitaceae  | <i>Thladiantha</i> | <i>Thladiantha grandisepala</i> | JN047395 |
| Eudicotyledons | Cucurbitaceae  | <i>Thladiantha</i> | <i>Thladiantha grandisepala</i> | JN047396 |
| Eudicotyledons | Cucurbitaceae  | <i>Thladiantha</i> | <i>Thladiantha grandisepala</i> | JN047397 |
| Eudicotyledons | Cucurbitaceae  | <i>Thladiantha</i> | <i>Thladiantha grandisepala</i> | JN047398 |
| Eudicotyledons | Cucurbitaceae  | <i>Thladiantha</i> | <i>Thladiantha grandisepala</i> | JN047399 |
| Eudicotyledons | Cucurbitaceae  | <i>Thladiantha</i> | <i>Thladiantha henryi</i>       | JN047400 |
| Eudicotyledons | Cucurbitaceae  | <i>Thladiantha</i> | <i>Thladiantha henryi</i>       | JN047401 |
| Eudicotyledons | Cucurbitaceae  | <i>Thladiantha</i> | <i>Thladiantha henryi</i>       | JN047402 |
| Eudicotyledons | Cucurbitaceae  | <i>Thladiantha</i> | <i>Thladiantha longisepala</i>  | JN047415 |
| Eudicotyledons | Cucurbitaceae  | <i>Thladiantha</i> | <i>Thladiantha longisepala</i>  | JN047416 |
| Eudicotyledons | Cucurbitaceae  | <i>Thladiantha</i> | <i>Thladiantha longisepala</i>  | JN047417 |
| Eudicotyledons | Cucurbitaceae  | <i>Thladiantha</i> | <i>Thladiantha maculata</i>     | JN047418 |
| Eudicotyledons | Cucurbitaceae  | <i>Thladiantha</i> | <i>Thladiantha maculata</i>     | JN047419 |
| Eudicotyledons | Cucurbitaceae  | <i>Thladiantha</i> | <i>Thladiantha maculata</i>     | JN047420 |
| Eudicotyledons | Cucurbitaceae  | <i>Thladiantha</i> | <i>Thladiantha maculata</i>     | JN047421 |
| Eudicotyledons | Cucurbitaceae  | <i>Thladiantha</i> | <i>Thladiantha maculata</i>     | JN047422 |
| Eudicotyledons | Cucurbitaceae  | <i>Thladiantha</i> | <i>Thladiantha maculata</i>     | JN047423 |
| Eudicotyledons | Cucurbitaceae  | <i>Thladiantha</i> | <i>Thladiantha montana</i>      | JN047424 |
| Eudicotyledons | Cucurbitaceae  | <i>Thladiantha</i> | <i>Thladiantha montana</i>      | JN047425 |
| Eudicotyledons | Cucurbitaceae  | <i>Thladiantha</i> | <i>Thladiantha montana</i>      | JN047426 |
| Eudicotyledons | Cucurbitaceae  | <i>Thladiantha</i> | <i>Thladiantha montana</i>      | JN047427 |
| Eudicotyledons | Cucurbitaceae  | <i>Thladiantha</i> | <i>Thladiantha montana</i>      | JN047428 |
| Eudicotyledons | Cucurbitaceae  | <i>Thladiantha</i> | <i>Thladiantha oliveri</i>      | JN047439 |
| Eudicotyledons | Cucurbitaceae  | <i>Thladiantha</i> | <i>Thladiantha oliveri</i>      | JN047440 |
| Eudicotyledons | Cucurbitaceae  | <i>Thladiantha</i> | <i>Thladiantha oliveri</i>      | JN047441 |
| Eudicotyledons | Cucurbitaceae  | <i>Thladiantha</i> | <i>Thladiantha oliveri</i>      | JN047442 |

|                |               |                    |                              |          |
|----------------|---------------|--------------------|------------------------------|----------|
| Eudicotyledons | Cucurbitaceae | <i>Thladiantha</i> | <i>Thladiantha oliveri</i>   | JN047443 |
| Eudicotyledons | Cucurbitaceae | <i>Thladiantha</i> | <i>Thladiantha oliveri</i>   | JN047444 |
| Eudicotyledons | Cucurbitaceae | <i>Thladiantha</i> | <i>Thladiantha villosula</i> | JN047445 |
| Eudicotyledons | Cucurbitaceae | <i>Thladiantha</i> | <i>Thladiantha villosula</i> | JN047446 |
| Eudicotyledons | Cucurbitaceae | <i>Thladiantha</i> | <i>Thladiantha villosula</i> | JN047447 |
| Eudicotyledons | Cucurbitaceae | <i>Thladiantha</i> | <i>Thladiantha villosula</i> | JN047448 |
| Eudicotyledons | Cucurbitaceae | <i>Thladiantha</i> | <i>Thladiantha villosula</i> | JN047449 |
| Eudicotyledons | Cucurbitaceae | <i>Thladiantha</i> | <i>Thladiantha villosula</i> | JN047450 |
| Eudicotyledons | Rosaceae      | <i>Potentilla</i>  | <i>Potentilla parvifolia</i> | JN044380 |
| Eudicotyledons | Rosaceae      | <i>Potentilla</i>  | <i>Potentilla parvifolia</i> | JN044381 |
| Eudicotyledons | Rosaceae      | <i>Potentilla</i>  | <i>Potentilla parvifolia</i> | JN044382 |
| Eudicotyledons | Rosaceae      | <i>Potentilla</i>  | <i>Potentilla parvifolia</i> | JN044383 |
| Eudicotyledons | Rosaceae      | <i>Potentilla</i>  | <i>Potentilla parvifolia</i> | JN044384 |
| Eudicotyledons | Rosaceae      | <i>Potentilla</i>  | <i>Potentilla parvifolia</i> | JN044385 |
| Eudicotyledons | Rosaceae      | <i>Potentilla</i>  | <i>Potentilla parvifolia</i> | JN044386 |
| Eudicotyledons | Rosaceae      | <i>Potentilla</i>  | <i>Potentilla parvifolia</i> | JN044387 |
| Eudicotyledons | Rosaceae      | <i>Potentilla</i>  | <i>Potentilla parvifolia</i> | JN044388 |
| Eudicotyledons | Onagraceae    | <i>Chamerion</i>   | <i>Chamerion conspersum</i>  | JN044478 |
| Eudicotyledons | Onagraceae    | <i>Chamerion</i>   | <i>Chamerion conspersum</i>  | JN129844 |
| Eudicotyledons | Moraceae      | <i>Ficus</i>       | <i>Ficus heteromorpha</i>    | JN044522 |
| Eudicotyledons | Moraceae      | <i>Ficus</i>       | <i>Ficus heteromorpha</i>    | JN044523 |
| Eudicotyledons | Rosaceae      | <i>Rubus</i>       | <i>Rubus reflexus</i>        | JN407044 |
| Eudicotyledons | Rosaceae      | <i>Rubus</i>       | <i>Rubus reflexus</i>        | JN407045 |
| Eudicotyledons | Rosaceae      | <i>Rubus</i>       | <i>Rubus reflexus</i>        | JN407046 |
| Eudicotyledons | Rosaceae      | <i>Rubus</i>       | <i>Rubus reflexus</i>        | JN407047 |
| Eudicotyledons | Rosaceae      | <i>Rubus</i>       | <i>Rubus reflexus</i>        | JN407050 |
| Eudicotyledons | Lamiaceae     | <i>Teucrium</i>    | <i>Teucrium polium</i>       | HQ902847 |
| Eudicotyledons | Lamiaceae     | <i>Teucrium</i>    | <i>Teucrium polium</i>       | HQ902867 |
| Eudicotyledons | Asteraceae    | <i>Senecio</i>     | <i>Senecio massaicus</i>     | JN789941 |
| Eudicotyledons | Asteraceae    | <i>Senecio</i>     | <i>Senecio massaicus</i>     | JN789942 |
| Eudicotyledons | Asteraceae    | <i>Senecio</i>     | <i>Senecio massaicus</i>     | JN789943 |
| Eudicotyledons | Lamiaceae     | <i>Teucrium</i>    | <i>Teucrium divaricatum</i>  | HQ902846 |
| Eudicotyledons | Lamiaceae     | <i>Teucrium</i>    | <i>Teucrium divaricatum</i>  | HQ902863 |
| Eudicotyledons | Amaranthaceae | <i>Chenopodium</i> | <i>Chenopodium album</i>     | HQ596639 |
| Eudicotyledons | Amaranthaceae | <i>Chenopodium</i> | <i>Chenopodium album</i>     | GQ435157 |
| Eudicotyledons | Amaranthaceae | <i>Chenopodium</i> | <i>Chenopodium album</i>     | JN044272 |
| Eudicotyledons | Amaranthaceae | <i>Chenopodium</i> | <i>Chenopodium album</i>     | JN044273 |
| Eudicotyledons | Amaranthaceae | <i>Chenopodium</i> | <i>Chenopodium album</i>     | JN044274 |
| Eudicotyledons | Amaranthaceae | <i>Chenopodium</i> | <i>Chenopodium album</i>     | JN044275 |
| Eudicotyledons | Amaranthaceae | <i>Chenopodium</i> | <i>Chenopodium album</i>     | JN044276 |
| Eudicotyledons | Amaranthaceae | <i>Chenopodium</i> | <i>Chenopodium album</i>     | JN044277 |
| Eudicotyledons | Amaranthaceae | <i>Chenopodium</i> | <i>Chenopodium album</i>     | JN044278 |
| Eudicotyledons | Amaranthaceae | <i>Chenopodium</i> | <i>Chenopodium album</i>     | JN044279 |
| Eudicotyledons | Amaranthaceae | <i>Chenopodium</i> | <i>Chenopodium album</i>     | JN044280 |
| Eudicotyledons | Amaranthaceae | <i>Chenopodium</i> | <i>Chenopodium album</i>     | JN044281 |
| Eudicotyledons | Amaranthaceae | <i>Chenopodium</i> | <i>Chenopodium album</i>     | JN044282 |
| Eudicotyledons | Amaranthaceae | <i>Chenopodium</i> | <i>Chenopodium album</i>     | JN044283 |
| Eudicotyledons | Amaranthaceae | <i>Chenopodium</i> | <i>Chenopodium album</i>     | JN044284 |
| Eudicotyledons | Amaranthaceae | <i>Chenopodium</i> | <i>Chenopodium album</i>     | JN044285 |
| Eudicotyledons | Amaranthaceae | <i>Chenopodium</i> | <i>Chenopodium album</i>     | JN044286 |
| Eudicotyledons | Amaranthaceae | <i>Chenopodium</i> | <i>Chenopodium album</i>     | JN044287 |
| Eudicotyledons | Amaranthaceae | <i>Chenopodium</i> | <i>Chenopodium album</i>     | JN044288 |
| Eudicotyledons | Amaranthaceae | <i>Chenopodium</i> | <i>Chenopodium album</i>     | JN044289 |



|                |               |                       |                                    |          |
|----------------|---------------|-----------------------|------------------------------------|----------|
| Eudicotyledons | Amaranthaceae | <i>Chenopodium</i>    | <i>Chenopodium album</i>           | JN044290 |
| Eudicotyledons | Amaranthaceae | <i>Chenopodium</i>    | <i>Chenopodium album</i>           | JN044291 |
| Eudicotyledons | Amaranthaceae | <i>Chenopodium</i>    | <i>Chenopodium album</i>           | JN044292 |
| Eudicotyledons | Amaranthaceae | <i>Amaranthus</i>     | <i>Amaranthus hybridus</i>         | GQ248242 |
| Eudicotyledons | Amaranthaceae | <i>Amaranthus</i>     | <i>Amaranthus hybridus</i>         | DQ006131 |
| Eudicotyledons | Amaranthaceae | <i>Amaranthus</i>     | <i>Amaranthus hybridus</i>         | JN043883 |
| Eudicotyledons | Amaranthaceae | <i>Amaranthus</i>     | <i>Amaranthus hybridus</i>         | JN043884 |
| Eudicotyledons | Amaranthaceae | <i>Amaranthus</i>     | <i>Amaranthus hybridus</i>         | JN043885 |
| Eudicotyledons | Vitaceae      | <i>Vitis</i>          | <i>Vitis aestivalis</i>            | JQ182515 |
| Eudicotyledons | Vitaceae      | <i>Vitis</i>          | <i>Vitis aestivalis</i>            | HM585788 |
| Eudicotyledons | Vitaceae      | <i>Vitis</i>          | <i>Vitis aestivalis</i>            | HQ108268 |
| Eudicotyledons | Vitaceae      | <i>Vitis</i>          | <i>Vitis aestivalis</i>            | HQ656411 |
| Eudicotyledons | Vitaceae      | <i>Vitis</i>          | <i>Vitis aestivalis</i>            | HQ656425 |
| Eudicotyledons | Vitaceae      | <i>Vitis</i>          | <i>Vitis aestivalis</i>            | HQ656426 |
| Eudicotyledons | Vitaceae      | <i>Vitis</i>          | <i>Vitis aestivalis</i>            | HQ656427 |
| Eudicotyledons | Vitaceae      | <i>Parthenocissus</i> | <i>Parthenocissus quinquefolia</i> | JQ182514 |
| Eudicotyledons | Vitaceae      | <i>Parthenocissus</i> | <i>Parthenocissus quinquefolia</i> | HM585680 |
| Eudicotyledons | Vitaceae      | <i>Parthenocissus</i> | <i>Parthenocissus quinquefolia</i> | HQ108338 |
| Eudicotyledons | Vitaceae      | <i>Parthenocissus</i> | <i>Parthenocissus quinquefolia</i> | HQ656485 |
| Eudicotyledons | Vitaceae      | <i>Parthenocissus</i> | <i>Parthenocissus quinquefolia</i> | JF437133 |
| Eudicotyledons | Rhamnaceae    | <i>Rhamnus</i>        | <i>Rhamnus cathartica</i>          | HQ596812 |
| Eudicotyledons | Rhamnaceae    | <i>Rhamnus</i>        | <i>Rhamnus cathartica</i>          | EU750518 |
| Eudicotyledons | Rhamnaceae    | <i>Rhamnus</i>        | <i>Rhamnus cathartica</i>          | EU750519 |
| Eudicotyledons | Rhamnaceae    | <i>Rhamnus</i>        | <i>Rhamnus cathartica</i>          | EU750520 |
| Eudicotyledons | Rhamnaceae    | <i>Rhamnus</i>        | <i>Rhamnus cathartica</i>          | EU750521 |
| Eudicotyledons | Malvaceae     | <i>Gossypium</i>      | <i>Gossypium barbadense</i>        | HM437878 |
| Eudicotyledons | Malvaceae     | <i>Gossypium</i>      | <i>Gossypium barbadense</i>        | HM437879 |
| Eudicotyledons | Malvaceae     | <i>Gossypium</i>      | <i>Gossypium barbadense</i>        | HM437880 |
| Eudicotyledons | Malvaceae     | <i>Gossypium</i>      | <i>Gossypium barbadense</i>        | HM437881 |
| Eudicotyledons | Malvaceae     | <i>Gossypium</i>      | <i>Gossypium barbadense</i>        | HM437882 |
| Eudicotyledons | Malvaceae     | <i>Gossypium</i>      | <i>Gossypium barbadense</i>        | HM437883 |
| Eudicotyledons | Malvaceae     | <i>Gossypium</i>      | <i>Gossypium barbadense</i>        | HM437884 |
| Eudicotyledons | Malvaceae     | <i>Gossypium</i>      | <i>Gossypium barbadense</i>        | HM437885 |
| Eudicotyledons | Malvaceae     | <i>Gossypium</i>      | <i>Gossypium hirsutum</i>          | HM437901 |
| Eudicotyledons | Malvaceae     | <i>Gossypium</i>      | <i>Gossypium hirsutum</i>          | HM437902 |
| Eudicotyledons | Malvaceae     | <i>Gossypium</i>      | <i>Gossypium hirsutum</i>          | HM437903 |
| Eudicotyledons | Malvaceae     | <i>Gossypium</i>      | <i>Gossypium hirsutum</i>          | HM437904 |
| Eudicotyledons | Malvaceae     | <i>Gossypium</i>      | <i>Gossypium hirsutum</i>          | HM437905 |
| Eudicotyledons | Malvaceae     | <i>Gossypium</i>      | <i>Gossypium hirsutum</i>          | HM437906 |
| Eudicotyledons | Malvaceae     | <i>Gossypium</i>      | <i>Gossypium hirsutum</i>          | HM437907 |
| Eudicotyledons | Cucurbitaceae | <i>Bryonia</i>        | <i>Bryonia dioica</i>              | FJ009144 |
| Eudicotyledons | Cucurbitaceae | <i>Bryonia</i>        | <i>Bryonia dioica</i>              | FJ009145 |
| Eudicotyledons | Cucurbitaceae | <i>Bryonia</i>        | <i>Bryonia dioica</i>              | FJ009146 |
| Eudicotyledons | Cucurbitaceae | <i>Bryonia</i>        | <i>Bryonia dioica</i>              | FJ009147 |
| Eudicotyledons | Cucurbitaceae | <i>Bryonia</i>        | <i>Bryonia dioica</i>              | FJ009148 |
| Eudicotyledons | Cucurbitaceae | <i>Bryonia</i>        | <i>Bryonia dioica</i>              | FJ009149 |
| Eudicotyledons | Cucurbitaceae | <i>Bryonia</i>        | <i>Bryonia dioica</i>              | FJ009150 |
| Eudicotyledons | Cucurbitaceae | <i>Bryonia</i>        | <i>Bryonia dioica</i>              | FJ009151 |
| Eudicotyledons | Cucurbitaceae | <i>Bryonia</i>        | <i>Bryonia dioica</i>              | FJ009152 |
| Eudicotyledons | Cucurbitaceae | <i>Bryonia</i>        | <i>Bryonia dioica</i>              | FJ009153 |
| Eudicotyledons | Cucurbitaceae | <i>Bryonia</i>        | <i>Bryonia dioica</i>              | FJ009154 |
| Eudicotyledons | Cucurbitaceae | <i>Bryonia</i>        | <i>Bryonia dioica</i>              | FJ009155 |
| Eudicotyledons | Cucurbitaceae | <i>Bryonia</i>        | <i>Bryonia dioica</i>              | FJ009156 |



|                |                |                      |                                  |          |
|----------------|----------------|----------------------|----------------------------------|----------|
| Eudicotyledons | Cucurbitaceae  | <i>Momordica</i>     | <i>Momordica charantia</i>       | GQ162992 |
| Eudicotyledons | Cucurbitaceae  | <i>Momordica</i>     | <i>Momordica charantia</i>       | GQ162993 |
| Eudicotyledons | Cucurbitaceae  | <i>Momordica</i>     | <i>Momordica charantia</i>       | GQ162994 |
| Eudicotyledons | Cucurbitaceae  | <i>Momordica</i>     | <i>Momordica charantia</i>       | GQ162995 |
| Eudicotyledons | Cucurbitaceae  | <i>Momordica</i>     | <i>Momordica charantia</i>       | GQ162996 |
| Eudicotyledons | Cucurbitaceae  | <i>Momordica</i>     | <i>Momordica charantia</i>       | GQ162997 |
| Eudicotyledons | Cucurbitaceae  | <i>Momordica</i>     | <i>Momordica charantia</i>       | GQ162998 |
| Eudicotyledons | Cucurbitaceae  | <i>Momordica</i>     | <i>Momordica charantia</i>       | JN406960 |
| Eudicotyledons | Cucurbitaceae  | <i>Momordica</i>     | <i>Momordica charantia</i>       | JN406961 |
| Eudicotyledons | Cucurbitaceae  | <i>Momordica</i>     | <i>Momordica charantia</i>       | JN406962 |
| Eudicotyledons | Cucurbitaceae  | <i>Momordica</i>     | <i>Momordica charantia</i>       | GQ845138 |
| Eudicotyledons | Cucurbitaceae  | <i>Momordica</i>     | <i>Momordica cochinchinensis</i> | GQ163004 |
| Eudicotyledons | Cucurbitaceae  | <i>Momordica</i>     | <i>Momordica cochinchinensis</i> | GQ163005 |
| Eudicotyledons | Cucurbitaceae  | <i>Momordica</i>     | <i>Momordica cochinchinensis</i> | GQ163006 |
| Eudicotyledons | Cucurbitaceae  | <i>Momordica</i>     | <i>Momordica cochinchinensis</i> | GQ163007 |
| Eudicotyledons | Cucurbitaceae  | <i>Momordica</i>     | <i>Momordica cochinchinensis</i> | GQ435030 |
| Eudicotyledons | Cucurbitaceae  | <i>Momordica</i>     | <i>Momordica cochinchinensis</i> | GQ435031 |
| Eudicotyledons | Cucurbitaceae  | <i>Momordica</i>     | <i>Momordica cochinchinensis</i> | GQ845134 |
| Eudicotyledons | Cucurbitaceae  | <i>Momordica</i>     | <i>Momordica cochinchinensis</i> | GQ845135 |
| Eudicotyledons | Cucurbitaceae  | <i>Momordica</i>     | <i>Momordica cochinchinensis</i> | GQ845136 |
| Eudicotyledons | Cucurbitaceae  | <i>Momordica</i>     | <i>Momordica repens</i>          | GQ163068 |
| Eudicotyledons | Cucurbitaceae  | <i>Momordica</i>     | <i>Momordica repens</i>          | GQ163069 |
| Eudicotyledons | Cucurbitaceae  | <i>Trichosanthes</i> | <i>Trichosanthes kirilowii</i>   | GQ435028 |
| Eudicotyledons | Cucurbitaceae  | <i>Trichosanthes</i> | <i>Trichosanthes kirilowii</i>   | GQ845127 |
| Eudicotyledons | Cucurbitaceae  | <i>Trichosanthes</i> | <i>Trichosanthes kirilowii</i>   | GQ845132 |
| Eudicotyledons | Cucurbitaceae  | <i>Trichosanthes</i> | <i>Trichosanthes kirilowii</i>   | GQ845133 |
| Eudicotyledons | Passifloraceae | <i>Passiflora</i>    | <i>Passiflora quadrangularis</i> | AY032809 |
| Eudicotyledons | Passifloraceae | <i>Passiflora</i>    | <i>Passiflora quadrangularis</i> | GQ248362 |
| Eudicotyledons | Passifloraceae | <i>Passiflora</i>    | <i>Passiflora quadrangularis</i> | EF590723 |
| Eudicotyledons | Salicaceae     | <i>Populus</i>       | <i>Populus tremuloides</i>       | EU750503 |
| Eudicotyledons | Salicaceae     | <i>Populus</i>       | <i>Populus tremuloides</i>       | EU750504 |
| Eudicotyledons | Salicaceae     | <i>Populus</i>       | <i>Populus tremuloides</i>       | EU750505 |
| Eudicotyledons | Salicaceae     | <i>Populus</i>       | <i>Populus deltoides</i>         | GU562412 |
| Eudicotyledons | Salicaceae     | <i>Populus</i>       | <i>Populus deltoides</i>         | HQ596797 |
| Eudicotyledons | Brassicaceae   | <i>Brassica</i>      | <i>Brassica juncea</i>           | GQ435335 |
| Eudicotyledons | Brassicaceae   | <i>Brassica</i>      | <i>Brassica juncea</i>           | GQ435336 |
| Eudicotyledons | Brassicaceae   | <i>Brassica</i>      | <i>Brassica juncea</i>           | AB669926 |
| Eudicotyledons | Brassicaceae   | <i>Capsella</i>      | <i>Capsella bursa-pastoris</i>   | FJ395502 |
| Eudicotyledons | Brassicaceae   | <i>Capsella</i>      | <i>Capsella bursa-pastoris</i>   | HQ596620 |
| Eudicotyledons | Brassicaceae   | <i>Capsella</i>      | <i>Capsella bursa-pastoris</i>   | FR822344 |
| Eudicotyledons | Brassicaceae   | <i>Capsella</i>      | <i>Capsella bursa-pastoris</i>   | FR822345 |
| Eudicotyledons | Brassicaceae   | <i>Capsella</i>      | <i>Capsella bursa-pastoris</i>   | FR822346 |
| Eudicotyledons | Brassicaceae   | <i>Capsella</i>      | <i>Capsella bursa-pastoris</i>   | FJ493269 |
| Eudicotyledons | Brassicaceae   | <i>Raphanus</i>      | <i>Raphanus sativus</i>          | GQ184362 |
| Eudicotyledons | Brassicaceae   | <i>Raphanus</i>      | <i>Raphanus sativus</i>          | GQ184363 |
| Eudicotyledons | Brassicaceae   | <i>Raphanus</i>      | <i>Raphanus sativus</i>          | GQ248384 |
| Eudicotyledons | Brassicaceae   | <i>Raphanus</i>      | <i>Raphanus sativus</i>          | GQ435337 |
| Eudicotyledons | Brassicaceae   | <i>Raphanus</i>      | <i>Raphanus sativus</i>          | AB669929 |
| Eudicotyledons | Brassicaceae   | <i>Raphanus</i>      | <i>Raphanus sativus</i>          | AB669930 |
| Eudicotyledons | Brassicaceae   | <i>Raphanus</i>      | <i>Raphanus sativus</i>          | EF590737 |
| Eudicotyledons | Sapotaceae     | <i>Manilkara</i>     | <i>Manilkara zapota</i>          | GU135342 |
| Eudicotyledons | Sapotaceae     | <i>Manilkara</i>     | <i>Manilkara zapota</i>          | AM179738 |
| Eudicotyledons | Rosaceae       | <i>Prunus</i>        | <i>Prunus domestica</i>          | AY500614 |

|                |                 |                  |                              |          |
|----------------|-----------------|------------------|------------------------------|----------|
| Eudicotyledons | Rosaceae        | <i>Prunus</i>    | <i>Prunus domestica</i>      | FN675833 |
| Eudicotyledons | Rosaceae        | <i>Prunus</i>    | <i>Prunus x yedoensis</i>    | GQ248382 |
| Eudicotyledons | Rosaceae        | <i>Prunus</i>    | <i>Prunus x yedoensis</i>    | EF590735 |
| Eudicotyledons | Rosaceae        | <i>Prunus</i>    | <i>Prunus persica</i>        | GQ435268 |
| Eudicotyledons | Rosaceae        | <i>Prunus</i>    | <i>Prunus persica</i>        | GQ435269 |
| Eudicotyledons | Rosaceae        | <i>Prunus</i>    | <i>Prunus persica</i>        | AY500628 |
| Eudicotyledons | Rosaceae        | <i>Prunus</i>    | <i>Prunus persica</i>        | FN675835 |
| Eudicotyledons | Rosaceae        | <i>Prunus</i>    | <i>Prunus persica</i>        | JN046652 |
| Eudicotyledons | Rosaceae        | <i>Prunus</i>    | <i>Prunus persica</i>        | JN046653 |
| Eudicotyledons | Rosaceae        | <i>Prunus</i>    | <i>Prunus persica</i>        | JN046654 |
| Eudicotyledons | Rosaceae        | <i>Prunus</i>    | <i>Prunus persica</i>        | JN046655 |
| Eudicotyledons | Rosaceae        | <i>Prunus</i>    | <i>Prunus persica</i>        | JN046656 |
| Eudicotyledons | Rosaceae        | <i>Prunus</i>    | <i>Prunus persica</i>        | JN046657 |
| Eudicotyledons | Rosaceae        | <i>Prunus</i>    | <i>Prunus persica</i>        | JN046658 |
| Eudicotyledons | Rosaceae        | <i>Prunus</i>    | <i>Prunus persica</i>        | JN046660 |
| Eudicotyledons | Grossulariaceae | <i>Ribes</i>     | <i>Ribes americanum</i>      | HQ596814 |
| Eudicotyledons | Grossulariaceae | <i>Ribes</i>     | <i>Ribes americanum</i>      | HQ596815 |
| Eudicotyledons | Fabaceae        | <i>Acacia</i>    | <i>Acacia confusa</i>        | GU396784 |
| Eudicotyledons | Fabaceae        | <i>Acacia</i>    | <i>Acacia confusa</i>        | GU396785 |
| Eudicotyledons | Fabaceae        | <i>Acacia</i>    | <i>Acacia confusa</i>        | GQ435006 |
| Eudicotyledons | Fabaceae        | <i>Albizia</i>   | <i>Albizia julibrissin</i>   | GU396765 |
| Eudicotyledons | Fabaceae        | <i>Albizia</i>   | <i>Albizia julibrissin</i>   | GU135433 |
| Eudicotyledons | Fabaceae        | <i>Albizia</i>   | <i>Albizia julibrissin</i>   | EU811952 |
| Eudicotyledons | Fabaceae        | <i>Albizia</i>   | <i>Albizia julibrissin</i>   | JF733773 |
| Eudicotyledons | Fabaceae        | <i>Canavalia</i> | <i>Canavalia rosea</i>       | HQ707421 |
| Eudicotyledons | Fabaceae        | <i>Canavalia</i> | <i>Canavalia rosea</i>       | HQ707422 |
| Eudicotyledons | Fabaceae        | <i>Canavalia</i> | <i>Canavalia rosea</i>       | HQ707423 |
| Eudicotyledons | Fabaceae        | <i>Canavalia</i> | <i>Canavalia rosea</i>       | HQ707424 |
| Eudicotyledons | Fabaceae        | <i>Canavalia</i> | <i>Canavalia rosea</i>       | HQ707425 |
| Eudicotyledons | Fabaceae        | <i>Canavalia</i> | <i>Canavalia rosea</i>       | HQ707426 |
| Eudicotyledons | Fabaceae        | <i>Canavalia</i> | <i>Canavalia rosea</i>       | HQ707427 |
| Eudicotyledons | Fabaceae        | <i>Canavalia</i> | <i>Canavalia rosea</i>       | HQ707428 |
| Eudicotyledons | Fabaceae        | <i>Leucaena</i>  | <i>Leucaena leucocephala</i> | GU396787 |
| Eudicotyledons | Fabaceae        | <i>Leucaena</i>  | <i>Leucaena leucocephala</i> | AF524962 |
| Eudicotyledons | Fabaceae        | <i>Leucaena</i>  | <i>Leucaena leucocephala</i> | GU135371 |
| Eudicotyledons | Fabaceae        | <i>Leucaena</i>  | <i>Leucaena leucocephala</i> | EU811958 |
| Eudicotyledons | Fabaceae        | <i>Trifolium</i> | <i>Trifolium repens</i>      | FJ395537 |
| Eudicotyledons | Fabaceae        | <i>Trifolium</i> | <i>Trifolium repens</i>      | EU750600 |
| Eudicotyledons | Fabaceae        | <i>Trifolium</i> | <i>Trifolium repens</i>      | EU750601 |
| Eudicotyledons | Fabaceae        | <i>Trifolium</i> | <i>Trifolium repens</i>      | EU750602 |
| Eudicotyledons | Fabaceae        | <i>Wisteria</i>  | <i>Wisteria floribunda</i>   | EU424096 |
| Eudicotyledons | Fabaceae        | <i>Wisteria</i>  | <i>Wisteria floribunda</i>   | EU424097 |
| Eudicotyledons | Fabaceae        | <i>Wisteria</i>  | <i>Wisteria floribunda</i>   | EU424098 |
| Eudicotyledons | Linaceae        | <i>Linum</i>     | <i>Linum usitatissimum</i>   | GQ845295 |
| Eudicotyledons | Linaceae        | <i>Linum</i>     | <i>Linum usitatissimum</i>   | GQ845296 |
| Eudicotyledons | Linaceae        | <i>Linum</i>     | <i>Linum usitatissimum</i>   | GQ845297 |
| Eudicotyledons | Linaceae        | <i>Linum</i>     | <i>Linum usitatissimum</i>   | GQ845298 |
| Eudicotyledons | Linaceae        | <i>Linum</i>     | <i>Linum usitatissimum</i>   | GQ845299 |
| Eudicotyledons | Linaceae        | <i>Linum</i>     | <i>Linum usitatissimum</i>   | GQ845300 |
| Eudicotyledons | Linaceae        | <i>Linum</i>     | <i>Linum usitatissimum</i>   | GQ845301 |
| Eudicotyledons | Linaceae        | <i>Linum</i>     | <i>Linum usitatissimum</i>   | GQ845302 |
| Eudicotyledons | Linaceae        | <i>Linum</i>     | <i>Linum usitatissimum</i>   | GQ845303 |
| Eudicotyledons | Linaceae        | <i>Linum</i>     | <i>Linum usitatissimum</i>   | GQ845304 |

|                |             |                   |                             |          |
|----------------|-------------|-------------------|-----------------------------|----------|
| Eudicotyledons | Burseraceae | <i>Bursera</i>    | <i>Bursera inaguensis</i>   | GQ377880 |
| Eudicotyledons | Burseraceae | <i>Bursera</i>    | <i>Bursera inaguensis</i>   | GQ377881 |
| Eudicotyledons | Burseraceae | <i>Bursera</i>    | <i>Bursera inaguensis</i>   | AY309393 |
| Eudicotyledons | Aceraceae   | <i>Acer</i>       | <i>Acer negundo</i>         | DQ978611 |
| Eudicotyledons | Aceraceae   | <i>Acer</i>       | <i>Acer negundo</i>         | HQ596578 |
| Eudicotyledons | Aceraceae   | <i>Acer</i>       | <i>Acer negundo</i>         | DQ006227 |
| Eudicotyledons | Aceraceae   | <i>Acer</i>       | <i>Acer negundo</i>         | EU750427 |
| Eudicotyledons | Aceraceae   | <i>Acer</i>       | <i>Acer negundo</i>         | EU750428 |
| Eudicotyledons | Aceraceae   | <i>Acer</i>       | <i>Acer saccharum</i>       | DQ887747 |
| Eudicotyledons | Aceraceae   | <i>Acer</i>       | <i>Acer saccharum</i>       | DQ887748 |
| Eudicotyledons | Aceraceae   | <i>Acer</i>       | <i>Acer saccharum</i>       | EU750438 |
| Eudicotyledons | Aceraceae   | <i>Acer</i>       | <i>Acer saccharum</i>       | EU750439 |
| Eudicotyledons | Aceraceae   | <i>Acer</i>       | <i>Acer saccharum</i>       | EU750440 |
| Eudicotyledons | Aceraceae   | <i>Acer</i>       | <i>Acer platanoides</i>     | DQ978619 |
| Eudicotyledons | Aceraceae   | <i>Acer</i>       | <i>Acer platanoides</i>     | EU750429 |
| Eudicotyledons | Aceraceae   | <i>Acer</i>       | <i>Acer platanoides</i>     | EU750430 |
| Eudicotyledons | Aceraceae   | <i>Acer</i>       | <i>Acer pseudoplatanus</i>  | DQ978620 |
| Eudicotyledons | Aceraceae   | <i>Acer</i>       | <i>Acer pseudoplatanus</i>  | DQ978621 |
| Eudicotyledons | Aceraceae   | <i>Acer</i>       | <i>Acer pseudoplatanus</i>  | FJ395512 |
| Eudicotyledons | Araliaceae  | <i>Hedera</i>     | <i>Hedera helix</i>         | FJ395451 |
| Eudicotyledons | Araliaceae  | <i>Hedera</i>     | <i>Hedera helix</i>         | FN675793 |
| Eudicotyledons | Araliaceae  | <i>Panax</i>      | <i>Panax ginseng</i>        | GQ435398 |
| Eudicotyledons | Araliaceae  | <i>Panax</i>      | <i>Panax ginseng</i>        | HQ112863 |
| Eudicotyledons | Araliaceae  | <i>Panax</i>      | <i>Panax ginseng</i>        | HQ112864 |
| Eudicotyledons | Solanaceae  | <i>Capsicum</i>   | <i>Capsicum annuum</i>      | JQ087870 |
| Eudicotyledons | Solanaceae  | <i>Capsicum</i>   | <i>Capsicum annuum</i>      | GU575282 |
| Eudicotyledons | Solanaceae  | <i>Capsicum</i>   | <i>Capsicum frutescens</i>  | JQ087871 |
| Eudicotyledons | Solanaceae  | <i>Capsicum</i>   | <i>Capsicum frutescens</i>  | EF537185 |
| Eudicotyledons | Solanaceae  | <i>Capsicum</i>   | <i>Capsicum frutescens</i>  | EF537186 |
| Eudicotyledons | Solanaceae  | <i>Capsicum</i>   | <i>Capsicum frutescens</i>  | EF537187 |
| Eudicotyledons | Solanaceae  | <i>Datura</i>     | <i>Datura innoxia</i>       | GQ274314 |
| Eudicotyledons | Solanaceae  | <i>Datura</i>     | <i>Datura innoxia</i>       | GQ435286 |
| Eudicotyledons | Solanaceae  | <i>Datura</i>     | <i>Datura innoxia</i>       | JN244375 |
| Eudicotyledons | Solanaceae  | <i>Datura</i>     | <i>Datura innoxia</i>       | JN244376 |
| Eudicotyledons | Solanaceae  | <i>Datura</i>     | <i>Datura innoxia</i>       | JN244377 |
| Eudicotyledons | Solanaceae  | <i>Datura</i>     | <i>Datura stramonium</i>    | GQ248285 |
| Eudicotyledons | Solanaceae  | <i>Datura</i>     | <i>Datura stramonium</i>    | JN244368 |
| Eudicotyledons | Solanaceae  | <i>Datura</i>     | <i>Datura stramonium</i>    | JN244369 |
| Eudicotyledons | Solanaceae  | <i>Datura</i>     | <i>Datura stramonium</i>    | JN244370 |
| Eudicotyledons | Solanaceae  | <i>Datura</i>     | <i>Datura stramonium</i>    | JN244371 |
| Eudicotyledons | Solanaceae  | <i>Datura</i>     | <i>Datura stramonium</i>    | JN244372 |
| Eudicotyledons | Solanaceae  | <i>Datura</i>     | <i>Datura stramonium</i>    | JN244373 |
| Eudicotyledons | Solanaceae  | <i>Datura</i>     | <i>Datura stramonium</i>    | JN244374 |
| Eudicotyledons | Solanaceae  | <i>Datura</i>     | <i>Datura stramonium</i>    | EF590686 |
| Eudicotyledons | Solanaceae  | <i>Datura</i>     | <i>Datura stramonium</i>    | DQ006229 |
| Eudicotyledons | Solanaceae  | <i>Hyoscyamus</i> | <i>Hyoscyamus niger</i>     | HQ216161 |
| Eudicotyledons | Solanaceae  | <i>Hyoscyamus</i> | <i>Hyoscyamus niger</i>     | HQ216162 |
| Eudicotyledons | Solanaceae  | <i>Solanum</i>    | <i>Solanum lycopersicum</i> | GU562406 |
| Eudicotyledons | Solanaceae  | <i>Solanum</i>    | <i>Solanum lycopersicum</i> | GU575280 |
| Eudicotyledons | Solanaceae  | <i>Solanum</i>    | <i>Solanum lycopersicum</i> | FN675828 |
| Eudicotyledons | Solanaceae  | <i>Solanum</i>    | <i>Solanum lycopersicum</i> | HQ856112 |
| Eudicotyledons | Solanaceae  | <i>Petunia</i>    | <i>Petunia integrifolia</i> | AY772904 |
| Eudicotyledons | Solanaceae  | <i>Petunia</i>    | <i>Petunia integrifolia</i> | AY772905 |



|                |                |                    |                                |          |
|----------------|----------------|--------------------|--------------------------------|----------|
| Eudicotyledons | Solanaceae     | <i>Petunia</i>     | <i>Petunia integrifolia</i>    | DQ208142 |
| Eudicotyledons | Solanaceae     | <i>Petunia</i>     | <i>Petunia integrifolia</i>    | DQ208143 |
| Eudicotyledons | Solanaceae     | <i>Petunia</i>     | <i>Petunia integrifolia</i>    | DQ208144 |
| Eudicotyledons | Solanaceae     | <i>Petunia</i>     | <i>Petunia integrifolia</i>    | DQ208145 |
| Eudicotyledons | Solanaceae     | <i>Petunia</i>     | <i>Petunia integrifolia</i>    | DQ208146 |
| Eudicotyledons | Solanaceae     | <i>Petunia</i>     | <i>Petunia integrifolia</i>    | DQ208147 |
| Eudicotyledons | Solanaceae     | <i>Petunia</i>     | <i>Petunia integrifolia</i>    | DQ208148 |
| Eudicotyledons | Solanaceae     | <i>Petunia</i>     | <i>Petunia integrifolia</i>    | DQ208149 |
| Eudicotyledons | Solanaceae     | <i>Petunia</i>     | <i>Petunia integrifolia</i>    | DQ208150 |
| Eudicotyledons | Solanaceae     | <i>Petunia</i>     | <i>Petunia integrifolia</i>    | DQ208151 |
| Eudicotyledons | Solanaceae     | <i>Petunia</i>     | <i>Petunia integrifolia</i>    | DQ208152 |
| Eudicotyledons | Solanaceae     | <i>Petunia</i>     | <i>Petunia integrifolia</i>    | DQ208153 |
| Eudicotyledons | Solanaceae     | <i>Petunia</i>     | <i>Petunia integrifolia</i>    | DQ208154 |
| Eudicotyledons | Solanaceae     | <i>Petunia</i>     | <i>Petunia integrifolia</i>    | DQ208162 |
| Eudicotyledons | Solanaceae     | <i>Solanum</i>     | <i>Solanum melongena</i>       | HM016405 |
| Eudicotyledons | Solanaceae     | <i>Solanum</i>     | <i>Solanum melongena</i>       | HM016406 |
| Eudicotyledons | Solanaceae     | <i>Solanum</i>     | <i>Solanum melongena</i>       | HM016407 |
| Eudicotyledons | Solanaceae     | <i>Solanum</i>     | <i>Solanum melongena</i>       | HM016408 |
| Eudicotyledons | Solanaceae     | <i>Solanum</i>     | <i>Solanum melongena</i>       | HM016409 |
| Eudicotyledons | Solanaceae     | <i>Solanum</i>     | <i>Solanum melongena</i>       | HM016410 |
| Eudicotyledons | Solanaceae     | <i>Solanum</i>     | <i>Solanum nigrum</i>          | EU750554 |
| Eudicotyledons | Solanaceae     | <i>Solanum</i>     | <i>Solanum nigrum</i>          | EU750555 |
| Eudicotyledons | Solanaceae     | <i>Solanum</i>     | <i>Solanum nigrum</i>          | EU750556 |
| Eudicotyledons | Solanaceae     | <i>Solanum</i>     | <i>Solanum nigrum</i>          | FN675826 |
| Eudicotyledons | Solanaceae     | <i>Solanum</i>     | <i>Solanum nigrum</i>          | JN047220 |
| Eudicotyledons | Solanaceae     | <i>Solanum</i>     | <i>Solanum nigrum</i>          | JN047221 |
| Eudicotyledons | Solanaceae     | <i>Solanum</i>     | <i>Solanum nigrum</i>          | JN047222 |
| Eudicotyledons | Solanaceae     | <i>Solanum</i>     | <i>Solanum nigrum</i>          | JN047223 |
| Eudicotyledons | Solanaceae     | <i>Solanum</i>     | <i>Solanum nigrum</i>          | JN047224 |
| Eudicotyledons | Solanaceae     | <i>Solanum</i>     | <i>Solanum nigrum</i>          | JN047225 |
| Eudicotyledons | Convolvulaceae | <i>Convolvulus</i> | <i>Convolvulus arvensis</i>    | FJ395486 |
| Eudicotyledons | Convolvulaceae | <i>Convolvulus</i> | <i>Convolvulus arvensis</i>    | HQ596651 |
| Eudicotyledons | Lamiaceae      | <i>Leonurus</i>    | <i>Leonurus japonicus</i>      | JQ339258 |
| Eudicotyledons | Lamiaceae      | <i>Leonurus</i>    | <i>Leonurus japonicus</i>      | JQ339259 |
| Eudicotyledons | Lamiaceae      | <i>Leonurus</i>    | <i>Leonurus japonicus</i>      | EU590862 |
| Eudicotyledons | Lamiaceae      | <i>Leonurus</i>    | <i>Leonurus japonicus</i>      | FJ513112 |
| Eudicotyledons | Plantaginaceae | <i>Antirrhinum</i> | <i>Antirrhinum majus</i>       | HM152920 |
| Eudicotyledons | Plantaginaceae | <i>Antirrhinum</i> | <i>Antirrhinum majus</i>       | HM152921 |
| Eudicotyledons | Plantaginaceae | <i>Antirrhinum</i> | <i>Antirrhinum majus</i>       | HM152922 |
| Eudicotyledons | Plantaginaceae | <i>Antirrhinum</i> | <i>Antirrhinum majus</i>       | HM152923 |
| Eudicotyledons | Plantaginaceae | <i>Antirrhinum</i> | <i>Antirrhinum majus</i>       | HM152924 |
| Eudicotyledons | Plantaginaceae | <i>Antirrhinum</i> | <i>Antirrhinum majus</i>       | HM152925 |
| Eudicotyledons | Adoxaceae      | <i>Sambucus</i>    | <i>Sambucus nigra</i>          | FJ395531 |
| Eudicotyledons | Adoxaceae      | <i>Sambucus</i>    | <i>Sambucus nigra</i>          | FJ395532 |
| Eudicotyledons | Adoxaceae      | <i>Sambucus</i>    | <i>Sambucus nigra</i>          | FN675824 |
| Eudicotyledons | Adoxaceae      | <i>Sambucus</i>    | <i>Sambucus racemosa</i>       | HQ596834 |
| Eudicotyledons | Adoxaceae      | <i>Sambucus</i>    | <i>Sambucus racemosa</i>       | FN675823 |
| Eudicotyledons | Adoxaceae      | <i>Viburnum</i>    | <i>Viburnum acerifolium</i>    | AY627384 |
| Eudicotyledons | Adoxaceae      | <i>Viburnum</i>    | <i>Viburnum acerifolium</i>    | DQ006166 |
| Eudicotyledons | Adoxaceae      | <i>Viburnum</i>    | <i>Viburnum acerifolium</i>    | EU750607 |
| Eudicotyledons | Adoxaceae      | <i>Viburnum</i>    | <i>Viburnum acerifolium</i>    | EU750608 |
| Eudicotyledons | Asteraceae     | <i>Ambrosia</i>    | <i>Ambrosia artemisiifolia</i> | HQ596592 |
| Eudicotyledons | Asteraceae     | <i>Ambrosia</i>    | <i>Ambrosia artemisiifolia</i> | GQ248244 |

|                |                |                     |                                    |          |
|----------------|----------------|---------------------|------------------------------------|----------|
| Eudicotyledons | Asteraceae     | <i>Ambrosia</i>     | <i>Ambrosia artemisiifolia</i>     | EF590669 |
| Eudicotyledons | Asteraceae     | <i>Ambrosia</i>     | <i>Ambrosia artemisiifolia</i>     | DQ006141 |
| Eudicotyledons | Asteraceae     | <i>Ambrosia</i>     | <i>Ambrosia trifida</i>            | GQ248245 |
| Eudicotyledons | Asteraceae     | <i>Ambrosia</i>     | <i>Ambrosia trifida</i>            | AY215512 |
| Eudicotyledons | Asteraceae     | <i>Ambrosia</i>     | <i>Ambrosia trifida</i>            | EF590670 |
| Eudicotyledons | Asteraceae     | <i>Ambrosia</i>     | <i>Ambrosia trifida</i>            | DQ006142 |
| Eudicotyledons | Asteraceae     | <i>Arctium</i>      | <i>Arctium lappa</i>               | GU724258 |
| Eudicotyledons | Asteraceae     | <i>Arctium</i>      | <i>Arctium lappa</i>               | GQ435104 |
| Eudicotyledons | Asteraceae     | <i>Arctium</i>      | <i>Arctium lappa</i>               | GQ435105 |
| Eudicotyledons | Asteraceae     | <i>Arctium</i>      | <i>Arctium lappa</i>               | AY914834 |
| Eudicotyledons | Asteraceae     | <i>Artemisia</i>    | <i>Artemisia vulgaris</i>          | HQ596606 |
| Eudicotyledons | Asteraceae     | <i>Artemisia</i>    | <i>Artemisia vulgaris</i>          | AB683349 |
| Eudicotyledons | Asteraceae     | <i>Helianthus</i>   | <i>Helianthus annuus</i>           | AM490227 |
| Eudicotyledons | Asteraceae     | <i>Helianthus</i>   | <i>Helianthus annuus</i>           | AY215554 |
| Eudicotyledons | Asteraceae     | <i>Helianthus</i>   | <i>Helianthus tuberosus</i>        | GU818386 |
| Eudicotyledons | Asteraceae     | <i>Helianthus</i>   | <i>Helianthus tuberosus</i>        | AM490226 |
| Eudicotyledons | Asteraceae     | <i>Helianthus</i>   | <i>Helianthus tuberosus</i>        | HQ688937 |
| Eudicotyledons | Asteraceae     | <i>Arnica</i>       | <i>Arnica mollis</i>               | AM690568 |
| Eudicotyledons | Asteraceae     | <i>Arnica</i>       | <i>Arnica mollis</i>               | AY215514 |
| Eudicotyledons | Cornaceae      | <i>Cornus</i>       | <i>Cornus racemosa</i>             | EU750448 |
| Eudicotyledons | Cornaceae      | <i>Cornus</i>       | <i>Cornus racemosa</i>             | EU750449 |
| Eudicotyledons | Cornaceae      | <i>Cornus</i>       | <i>Cornus racemosa</i>             | JF321216 |
| Eudicotyledons | Cornaceae      | <i>Nyssa</i>        | <i>Nyssa sylvatica</i>             | EU734456 |
| Eudicotyledons | Cornaceae      | <i>Nyssa</i>        | <i>Nyssa sylvatica</i>             | JN045594 |
| Eudicotyledons | Cornaceae      | <i>Nyssa</i>        | <i>Nyssa sylvatica</i>             | JN045595 |
| Eudicotyledons | Cornaceae      | <i>Nyssa</i>        | <i>Nyssa sylvatica</i>             | JN045596 |
| Eudicotyledons | Cornaceae      | <i>Nyssa</i>        | <i>Nyssa sylvatica</i>             | JF321236 |
| Eudicotyledons | Aquifoliaceae  | <i>Ilex</i>         | <i>Ilex aquifolium</i>             | FJ395543 |
| Eudicotyledons | Aquifoliaceae  | <i>Ilex</i>         | <i>Ilex aquifolium</i>             | EU359337 |
| Eudicotyledons | Aquifoliaceae  | <i>Ilex</i>         | <i>Ilex aquifolium</i>             | FN675791 |
| Eudicotyledons | Ericaceae      | <i>Rhododendron</i> | <i>Rhododendron hippophaeoides</i> | JN046840 |
| Eudicotyledons | Ericaceae      | <i>Rhododendron</i> | <i>Rhododendron hippophaeoides</i> | JN046841 |
| Eudicotyledons | Hamamelidaceae | <i>Hamamelis</i>    | <i>Hamamelis mollis</i>            | GU576760 |
| Eudicotyledons | Hamamelidaceae | <i>Hamamelis</i>    | <i>Hamamelis mollis</i>            | GU576761 |
| Eudicotyledons | Hamamelidaceae | <i>Hamamelis</i>    | <i>Hamamelis mollis</i>            | GU576762 |
| Eudicotyledons | Hamamelidaceae | <i>Hamamelis</i>    | <i>Hamamelis virginiana</i>        | GU576769 |
| Eudicotyledons | Hamamelidaceae | <i>Hamamelis</i>    | <i>Hamamelis virginiana</i>        | GU576770 |
| Eudicotyledons | Hamamelidaceae | <i>Hamamelis</i>    | <i>Hamamelis virginiana</i>        | EU595863 |
| Eudicotyledons | Altingiaceae   | <i>Liquidambar</i>  | <i>Liquidambar styraciflua</i>     | GU576773 |
| Eudicotyledons | Altingiaceae   | <i>Liquidambar</i>  | <i>Liquidambar styraciflua</i>     | AB445366 |
| Eudicotyledons | Altingiaceae   | <i>Liquidambar</i>  | <i>Liquidambar styraciflua</i>     | EF138707 |
| Eudicotyledons | Altingiaceae   | <i>Liquidambar</i>  | <i>Liquidambar styraciflua</i>     | EF138708 |
| Eudicotyledons | Altingiaceae   | <i>Liquidambar</i>  | <i>Liquidambar styraciflua</i>     | EF138709 |
| Eudicotyledons | Altingiaceae   | <i>Liquidambar</i>  | <i>Liquidambar styraciflua</i>     | EF138710 |
| Eudicotyledons | Altingiaceae   | <i>Liquidambar</i>  | <i>Liquidambar styraciflua</i>     | EF138711 |
| Eudicotyledons | Altingiaceae   | <i>Liquidambar</i>  | <i>Liquidambar styraciflua</i>     | EF138712 |
| Eudicotyledons | Altingiaceae   | <i>Liquidambar</i>  | <i>Liquidambar styraciflua</i>     | EF138713 |
| Eudicotyledons | Altingiaceae   | <i>Liquidambar</i>  | <i>Liquidambar styraciflua</i>     | EF138714 |
| Eudicotyledons | Altingiaceae   | <i>Liquidambar</i>  | <i>Liquidambar styraciflua</i>     | EF138715 |
| Eudicotyledons | Altingiaceae   | <i>Liquidambar</i>  | <i>Liquidambar styraciflua</i>     | EF138716 |
| Eudicotyledons | Altingiaceae   | <i>Liquidambar</i>  | <i>Liquidambar styraciflua</i>     | EF138717 |
| Eudicotyledons | Altingiaceae   | <i>Liquidambar</i>  | <i>Liquidambar styraciflua</i>     | EF138718 |
| Eudicotyledons | Altingiaceae   | <i>Liquidambar</i>  | <i>Liquidambar styraciflua</i>     | EF138719 |



|                |               |                    |                                |          |
|----------------|---------------|--------------------|--------------------------------|----------|
| Eudicotyledons | Altingiaceae  | <i>Liquidambar</i> | <i>Liquidambar styraciflua</i> | EF138720 |
| Eudicotyledons | Altingiaceae  | <i>Liquidambar</i> | <i>Liquidambar styraciflua</i> | EF138721 |
| Eudicotyledons | Altingiaceae  | <i>Liquidambar</i> | <i>Liquidambar styraciflua</i> | EF138722 |
| Eudicotyledons | Altingiaceae  | <i>Liquidambar</i> | <i>Liquidambar styraciflua</i> | EF138723 |
| Eudicotyledons | Altingiaceae  | <i>Liquidambar</i> | <i>Liquidambar styraciflua</i> | EF138724 |
| Eudicotyledons | Altingiaceae  | <i>Liquidambar</i> | <i>Liquidambar styraciflua</i> | EF138725 |
| Eudicotyledons | Altingiaceae  | <i>Liquidambar</i> | <i>Liquidambar styraciflua</i> | EF138726 |
| Eudicotyledons | Altingiaceae  | <i>Liquidambar</i> | <i>Liquidambar styraciflua</i> | EF138727 |
| Eudicotyledons | Altingiaceae  | <i>Liquidambar</i> | <i>Liquidambar styraciflua</i> | EF138728 |
| Eudicotyledons | Cornaceae     | <i>Cornus</i>      | <i>Cornus alternifolia</i>     | EU750446 |
| Eudicotyledons | Cornaceae     | <i>Cornus</i>      | <i>Cornus alternifolia</i>     | EU750447 |
| Eudicotyledons | Cornaceae     | <i>Cornus</i>      | <i>Cornus alternifolia</i>     | JF321212 |
| Eudicotyledons | Cornaceae     | <i>Cornus</i>      | <i>Cornus officinalis</i>      | GQ435328 |
| Eudicotyledons | Cornaceae     | <i>Cornus</i>      | <i>Cornus officinalis</i>      | JF321222 |
| Eudicotyledons | Fabaceae      | <i>Wisteria</i>    | <i>Wisteria sinensis</i>       | GU396782 |
| Eudicotyledons | Fabaceae      | <i>Wisteria</i>    | <i>Wisteria sinensis</i>       | EU424102 |
| Eudicotyledons | Fabaceae      | <i>Wisteria</i>    | <i>Wisteria sinensis</i>       | EU424103 |
| Eudicotyledons | Fabaceae      | <i>Wisteria</i>    | <i>Wisteria sinensis</i>       | EU424104 |
| Eudicotyledons | Fabaceae      | <i>Wisteria</i>    | <i>Wisteria sinensis</i>       | GU135426 |
| Eudicotyledons | Fabaceae      | <i>Wisteria</i>    | <i>Wisteria sinensis</i>       | FN675802 |
| Eudicotyledons | Rosaceae      | <i>Prunus</i>      | <i>Prunus serotina</i>         | HQ596803 |
| Eudicotyledons | Rosaceae      | <i>Prunus</i>      | <i>Prunus serotina</i>         | DQ006222 |
| Eudicotyledons | Rosaceae      | <i>Prunus</i>      | <i>Prunus serotina</i>         | AY500633 |
| Eudicotyledons | Fabaceae      | <i>Canavalia</i>   | <i>Canavalia cathartica</i>    | GU396816 |
| Eudicotyledons | Fabaceae      | <i>Canavalia</i>   | <i>Canavalia cathartica</i>    | HQ707430 |
| Eudicotyledons | Fabaceae      | <i>Canavalia</i>   | <i>Canavalia cathartica</i>    | HQ707432 |
| Eudicotyledons | Amaranthaceae | <i>Amaranthus</i>  | <i>Amaranthus tricolor</i>     | JN043902 |
| Eudicotyledons | Amaranthaceae | <i>Amaranthus</i>  | <i>Amaranthus tricolor</i>     | JN043903 |
| Eudicotyledons | Amaranthaceae | <i>Amaranthus</i>  | <i>Amaranthus tricolor</i>     | JN043904 |
| Eudicotyledons | Amaranthaceae | <i>Amaranthus</i>  | <i>Amaranthus tricolor</i>     | JN043905 |
| Eudicotyledons | Amaranthaceae | <i>Amaranthus</i>  | <i>Amaranthus tricolor</i>     | JN043906 |
| Eudicotyledons | Amaranthaceae | <i>Amaranthus</i>  | <i>Amaranthus tricolor</i>     | JN043907 |
| Eudicotyledons | Amaranthaceae | <i>Amaranthus</i>  | <i>Amaranthus tricolor</i>     | JN043908 |
| Eudicotyledons | Amaranthaceae | <i>Amaranthus</i>  | <i>Amaranthus tricolor</i>     | JN043909 |
| Eudicotyledons | Malvaceae     | <i>Gossypium</i>   | <i>Gossypium arboreum</i>      | HM437871 |
| Eudicotyledons | Malvaceae     | <i>Gossypium</i>   | <i>Gossypium arboreum</i>      | HM437872 |
| Eudicotyledons | Malvaceae     | <i>Gossypium</i>   | <i>Gossypium arboreum</i>      | HM437873 |
| Eudicotyledons | Malvaceae     | <i>Gossypium</i>   | <i>Gossypium arboreum</i>      | HM437874 |
| Eudicotyledons | Malvaceae     | <i>Gossypium</i>   | <i>Gossypium arboreum</i>      | HM437875 |
| Eudicotyledons | Malvaceae     | <i>Gossypium</i>   | <i>Gossypium arboreum</i>      | HM437876 |
| Eudicotyledons | Malvaceae     | <i>Gossypium</i>   | <i>Gossypium arboreum</i>      | HM437877 |
| Eudicotyledons | Vitaceae      | <i>Vitis</i>       | <i>Vitis vinifera</i>          | FR725983 |
| Eudicotyledons | Vitaceae      | <i>Vitis</i>       | <i>Vitis vinifera</i>          | FR725984 |
| Eudicotyledons | Vitaceae      | <i>Vitis</i>       | <i>Vitis vinifera</i>          | FR725985 |
| Eudicotyledons | Vitaceae      | <i>Vitis</i>       | <i>Vitis vinifera</i>          | FR725986 |
| Eudicotyledons | Vitaceae      | <i>Vitis</i>       | <i>Vitis vinifera</i>          | FR725987 |
| Eudicotyledons | Vitaceae      | <i>Vitis</i>       | <i>Vitis vinifera</i>          | FR725988 |
| Eudicotyledons | Vitaceae      | <i>Vitis</i>       | <i>Vitis vinifera</i>          | FR725989 |
| Eudicotyledons | Vitaceae      | <i>Vitis</i>       | <i>Vitis vinifera</i>          | FR725990 |
| Eudicotyledons | Vitaceae      | <i>Vitis</i>       | <i>Vitis vinifera</i>          | FR725991 |
| Eudicotyledons | Vitaceae      | <i>Vitis</i>       | <i>Vitis vinifera</i>          | FR725992 |
| Eudicotyledons | Vitaceae      | <i>Vitis</i>       | <i>Vitis vinifera</i>          | FR725993 |
| Eudicotyledons | Vitaceae      | <i>Vitis</i>       | <i>Vitis vinifera</i>          | FR725994 |







|                |             |                   |                            |          |
|----------------|-------------|-------------------|----------------------------|----------|
| Eudicotyledons | Solanaceae  | <i>Petunia</i>    | <i>Petunia axillaris</i>   | DQ225644 |
| Eudicotyledons | Solanaceae  | <i>Petunia</i>    | <i>Petunia axillaris</i>   | DQ225645 |
| Eudicotyledons | Solanaceae  | <i>Petunia</i>    | <i>Petunia axillaris</i>   | DQ225646 |
| Eudicotyledons | Solanaceae  | <i>Petunia</i>    | <i>Petunia axillaris</i>   | DQ225647 |
| Eudicotyledons | Solanaceae  | <i>Petunia</i>    | <i>Petunia axillaris</i>   | DQ225648 |
| Eudicotyledons | Solanaceae  | <i>Petunia</i>    | <i>Petunia axillaris</i>   | DQ225649 |
| Eudicotyledons | Solanaceae  | <i>Petunia</i>    | <i>Petunia axillaris</i>   | DQ225650 |
| Eudicotyledons | Solanaceae  | <i>Petunia</i>    | <i>Petunia axillaris</i>   | DQ225651 |
| Eudicotyledons | Solanaceae  | <i>Petunia</i>    | <i>Petunia axillaris</i>   | DQ225652 |
| Eudicotyledons | Solanaceae  | <i>Petunia</i>    | <i>Petunia axillaris</i>   | DQ225653 |
| Eudicotyledons | Solanaceae  | <i>Petunia</i>    | <i>Petunia axillaris</i>   | DQ225654 |
| Eudicotyledons | Solanaceae  | <i>Petunia</i>    | <i>Petunia axillaris</i>   | DQ225655 |
| Eudicotyledons | Solanaceae  | <i>Petunia</i>    | <i>Petunia axillaris</i>   | DQ225656 |
| Eudicotyledons | Solanaceae  | <i>Petunia</i>    | <i>Petunia axillaris</i>   | DQ225657 |
| Eudicotyledons | Solanaceae  | <i>Petunia</i>    | <i>Petunia axillaris</i>   | DQ225658 |
| Eudicotyledons | Solanaceae  | <i>Petunia</i>    | <i>Petunia axillaris</i>   | DQ225659 |
| Eudicotyledons | Solanaceae  | <i>Petunia</i>    | <i>Petunia axillaris</i>   | DQ225660 |
| Eudicotyledons | Solanaceae  | <i>Petunia</i>    | <i>Petunia axillaris</i>   | DQ225661 |
| Eudicotyledons | Solanaceae  | <i>Petunia</i>    | <i>Petunia axillaris</i>   | DQ225662 |
| Eudicotyledons | Solanaceae  | <i>Petunia</i>    | <i>Petunia axillaris</i>   | DQ225663 |
| Eudicotyledons | Solanaceae  | <i>Petunia</i>    | <i>Petunia axillaris</i>   | DQ225664 |
| Eudicotyledons | Solanaceae  | <i>Petunia</i>    | <i>Petunia axillaris</i>   | DQ225665 |
| Eudicotyledons | Malvaceae   | <i>Gossypium</i>  | <i>Gossypium herbaceum</i> | HM437886 |
| Eudicotyledons | Malvaceae   | <i>Gossypium</i>  | <i>Gossypium herbaceum</i> | HM437887 |
| Eudicotyledons | Malvaceae   | <i>Gossypium</i>  | <i>Gossypium herbaceum</i> | HM437888 |
| Eudicotyledons | Malvaceae   | <i>Gossypium</i>  | <i>Gossypium herbaceum</i> | HM437889 |
| Eudicotyledons | Malvaceae   | <i>Gossypium</i>  | <i>Gossypium herbaceum</i> | HM437890 |
| Eudicotyledons | Malvaceae   | <i>Gossypium</i>  | <i>Gossypium herbaceum</i> | HM437891 |
| Eudicotyledons | Malvaceae   | <i>Gossypium</i>  | <i>Gossypium herbaceum</i> | HM437892 |
| Eudicotyledons | Malvaceae   | <i>Gossypium</i>  | <i>Gossypium herbaceum</i> | HM437893 |
| Eudicotyledons | Malvaceae   | <i>Gossypium</i>  | <i>Gossypium herbaceum</i> | HM437894 |
| Eudicotyledons | Malvaceae   | <i>Gossypium</i>  | <i>Gossypium herbaceum</i> | HM437895 |
| Eudicotyledons | Malvaceae   | <i>Gossypium</i>  | <i>Gossypium herbaceum</i> | HM437896 |
| Eudicotyledons | Malvaceae   | <i>Gossypium</i>  | <i>Gossypium herbaceum</i> | HM437897 |
| Eudicotyledons | Malvaceae   | <i>Gossypium</i>  | <i>Gossypium herbaceum</i> | HM437898 |
| Eudicotyledons | Malvaceae   | <i>Gossypium</i>  | <i>Gossypium herbaceum</i> | HM437899 |
| Eudicotyledons | Malvaceae   | <i>Gossypium</i>  | <i>Gossypium herbaceum</i> | HM437900 |
| Eudicotyledons | Myrtaceae   | <i>Eucalyptus</i> | <i>Eucalyptus globulus</i> | GQ248303 |
| Eudicotyledons | Myrtaceae   | <i>Eucalyptus</i> | <i>Eucalyptus globulus</i> | EF434409 |
| Eudicotyledons | Myrtaceae   | <i>Eucalyptus</i> | <i>Eucalyptus globulus</i> | EF590698 |
| Eudicotyledons | Asteraceae  | <i>Artemisia</i>  | <i>Artemisia annua</i>     | FJ418749 |
| Eudicotyledons | Asteraceae  | <i>Artemisia</i>  | <i>Artemisia annua</i>     | GQ435090 |
| Eudicotyledons | Asteraceae  | <i>Artemisia</i>  | <i>Artemisia annua</i>     | GQ435091 |
| Eudicotyledons | Asteraceae  | <i>Artemisia</i>  | <i>Artemisia annua</i>     | DQ006143 |
| Eudicotyledons | Solanaceae  | <i>Datura</i>     | <i>Datura metel</i>        | GQ435287 |
| Eudicotyledons | Solanaceae  | <i>Datura</i>     | <i>Datura metel</i>        | JN244381 |
| Eudicotyledons | Solanaceae  | <i>Datura</i>     | <i>Datura metel</i>        | JN244382 |
| Eudicotyledons | Solanaceae  | <i>Datura</i>     | <i>Datura metel</i>        | JN244383 |
| Eudicotyledons | Solanaceae  | <i>Datura</i>     | <i>Datura metel</i>        | EF590685 |
| Eudicotyledons | Linaceae    | <i>Linum</i>      | <i>Linum perenne</i>       | HQ596750 |
| Eudicotyledons | Linaceae    | <i>Linum</i>      | <i>Linum perenne</i>       | GQ845287 |
| Eudicotyledons | Santalaceae | <i>Santalum</i>   | <i>Santalum album</i>      | GQ435374 |
| Eudicotyledons | Santalaceae | <i>Santalum</i>   | <i>Santalum album</i>      | GQ435375 |





|                |                 |                   |                               |          |
|----------------|-----------------|-------------------|-------------------------------|----------|
| Eudicotyledons | Oleaceae        | <i>Fraxinus</i>   | <i>Fraxinus americana</i>     | HM367360 |
| Eudicotyledons | Oleaceae        | <i>Fraxinus</i>   | <i>Fraxinus americana</i>     | HM367361 |
| Eudicotyledons | Oleaceae        | <i>Fraxinus</i>   | <i>Fraxinus americana</i>     | HM367362 |
| Eudicotyledons | Oleaceae        | <i>Fraxinus</i>   | <i>Fraxinus americana</i>     | HM367363 |
| Eudicotyledons | Oleaceae        | <i>Fraxinus</i>   | <i>Fraxinus americana</i>     | HM367364 |
| Eudicotyledons | Oleaceae        | <i>Fraxinus</i>   | <i>Fraxinus excelsior</i>     | FJ395513 |
| Eudicotyledons | Oleaceae        | <i>Fraxinus</i>   | <i>Fraxinus excelsior</i>     | HM367417 |
| Eudicotyledons | Oleaceae        | <i>Fraxinus</i>   | <i>Fraxinus excelsior</i>     | HM367418 |
| Eudicotyledons | Oleaceae        | <i>Fraxinus</i>   | <i>Fraxinus excelsior</i>     | HM367419 |
| Eudicotyledons | Oleaceae        | <i>Fraxinus</i>   | <i>Fraxinus excelsior</i>     | HM367420 |
| Eudicotyledons | Oleaceae        | <i>Fraxinus</i>   | <i>Fraxinus excelsior</i>     | HM367421 |
| Eudicotyledons | Oleaceae        | <i>Fraxinus</i>   | <i>Fraxinus excelsior</i>     | HM367422 |
| Eudicotyledons | Oleaceae        | <i>Fraxinus</i>   | <i>Fraxinus excelsior</i>     | HM367423 |
| Eudicotyledons | Oleaceae        | <i>Fraxinus</i>   | <i>Fraxinus ornus</i>         | HM367500 |
| Eudicotyledons | Oleaceae        | <i>Fraxinus</i>   | <i>Fraxinus ornus</i>         | HM367501 |
| Eudicotyledons | Oleaceae        | <i>Fraxinus</i>   | <i>Fraxinus ornus</i>         | HM367502 |
| Eudicotyledons | Oleaceae        | <i>Fraxinus</i>   | <i>Fraxinus ornus</i>         | HM367503 |
| Eudicotyledons | Oleaceae        | <i>Fraxinus</i>   | <i>Fraxinus ornus</i>         | HM367504 |
| Eudicotyledons | Oleaceae        | <i>Fraxinus</i>   | <i>Fraxinus ornus</i>         | HM367505 |
| Eudicotyledons | Vitaceae        | <i>Leea</i>       | <i>Leea guineensis</i>        | JQ182503 |
| Eudicotyledons | Vitaceae        | <i>Leea</i>       | <i>Leea guineensis</i>        | JF437121 |
| Eudicotyledons | Vitaceae        | <i>Leea</i>       | <i>Leea guineensis</i>        | JF437122 |
| Eudicotyledons | Lamiaceae       | <i>Ocimum</i>     | <i>Ocimum basilicum</i>       | JQ339256 |
| Eudicotyledons | Lamiaceae       | <i>Ocimum</i>     | <i>Ocimum basilicum</i>       | DQ667350 |
| Eudicotyledons | Lamiaceae       | <i>Ocimum</i>     | <i>Ocimum basilicum</i>       | FR726106 |
| Eudicotyledons | Lamiaceae       | <i>Ocimum</i>     | <i>Ocimum basilicum</i>       | FR726107 |
| Eudicotyledons | Lamiaceae       | <i>Ocimum</i>     | <i>Ocimum basilicum</i>       | FR726108 |
| Eudicotyledons | Lamiaceae       | <i>Ocimum</i>     | <i>Ocimum basilicum</i>       | FR726114 |
| Eudicotyledons | Lamiaceae       | <i>Ocimum</i>     | <i>Ocimum basilicum</i>       | FR726115 |
| Eudicotyledons | Lamiaceae       | <i>Ocimum</i>     | <i>Ocimum basilicum</i>       | FR726116 |
| Eudicotyledons | Lamiaceae       | <i>Ocimum</i>     | <i>Ocimum basilicum</i>       | FR726117 |
| Eudicotyledons | Lamiaceae       | <i>Ocimum</i>     | <i>Ocimum basilicum</i>       | FR726118 |
| Eudicotyledons | Lamiaceae       | <i>Ocimum</i>     | <i>Ocimum basilicum</i>       | FR726119 |
| Eudicotyledons | Lamiaceae       | <i>Ocimum</i>     | <i>Ocimum basilicum</i>       | FR726120 |
| Eudicotyledons | Lamiaceae       | <i>Ocimum</i>     | <i>Ocimum basilicum</i>       | FR726121 |
| Eudicotyledons | Lamiaceae       | <i>Ocimum</i>     | <i>Ocimum basilicum</i>       | HM590118 |
| Eudicotyledons | Lamiaceae       | <i>Origanum</i>   | <i>Origanum vulgare</i>       | DQ667353 |
| Eudicotyledons | Lamiaceae       | <i>Origanum</i>   | <i>Origanum vulgare</i>       | HQ596773 |
| Eudicotyledons | Lamiaceae       | <i>Origanum</i>   | <i>Origanum vulgare</i>       | FR726129 |
| Eudicotyledons | Lamiaceae       | <i>Origanum</i>   | <i>Origanum vulgare</i>       | FR726130 |
| Eudicotyledons | Lamiaceae       | <i>Origanum</i>   | <i>Origanum vulgare</i>       | FR726131 |
| Eudicotyledons | Lamiaceae       | <i>Origanum</i>   | <i>Origanum vulgare</i>       | FR726132 |
| Eudicotyledons | Lamiaceae       | <i>Origanum</i>   | <i>Origanum vulgare</i>       | FR726133 |
| Eudicotyledons | Lamiaceae       | <i>Origanum</i>   | <i>Origanum vulgare</i>       | FR865080 |
| Eudicotyledons | Lamiaceae       | <i>Origanum</i>   | <i>Origanum vulgare</i>       | FJ513100 |
| Eudicotyledons | Lamiaceae       | <i>Rosmarinus</i> | <i>Rosmarinus officinalis</i> | DQ667351 |
| Eudicotyledons | Lamiaceae       | <i>Rosmarinus</i> | <i>Rosmarinus officinalis</i> | FR726154 |
| Eudicotyledons | Lamiaceae       | <i>Rosmarinus</i> | <i>Rosmarinus officinalis</i> | FR726155 |
| Eudicotyledons | Lamiaceae       | <i>Rosmarinus</i> | <i>Rosmarinus officinalis</i> | FR726156 |
| Eudicotyledons | Lamiaceae       | <i>Rosmarinus</i> | <i>Rosmarinus officinalis</i> | FJ513141 |
| Eudicotyledons | Caryophyllaceae | <i>Silene</i>     | <i>Silene acaulis</i>         | AY949839 |
| Eudicotyledons | Caryophyllaceae | <i>Silene</i>     | <i>Silene acaulis</i>         | AY949840 |
| Eudicotyledons | Caryophyllaceae | <i>Silene</i>     | <i>Silene acaulis</i>         | AY949841 |



|                |                 |                    |                                   |          |
|----------------|-----------------|--------------------|-----------------------------------|----------|
| Eudicotyledons | Caryophyllaceae | <i>Silene</i>      | <i>Silene acaulis</i>             | AY949842 |
| Eudicotyledons | Caryophyllaceae | <i>Silene</i>      | <i>Silene dioica</i>              | FN821205 |
| Eudicotyledons | Caryophyllaceae | <i>Silene</i>      | <i>Silene dioica</i>              | FN821206 |
| Eudicotyledons | Caryophyllaceae | <i>Silene</i>      | <i>Silene dioica</i>              | FN821207 |
| Eudicotyledons | Caryophyllaceae | <i>Silene</i>      | <i>Silene dioica</i>              | FN821208 |
| Eudicotyledons | Caryophyllaceae | <i>Silene</i>      | <i>Silene dioica</i>              | FN821209 |
| Eudicotyledons | Caryophyllaceae | <i>Silene</i>      | <i>Silene dioica</i>              | FN821210 |
| Eudicotyledons | Caryophyllaceae | <i>Silene</i>      | <i>Silene dioica</i>              | FN821211 |
| Eudicotyledons | Salicaceae      | <i>Salix</i>       | <i>Salix viminalis</i>            | GU373302 |
| Eudicotyledons | Salicaceae      | <i>Salix</i>       | <i>Salix viminalis</i>            | GU373303 |
| Eudicotyledons | Saxifragaceae   | <i>Mitella</i>     | <i>Mitella diphylla</i>           | GU562388 |
| Eudicotyledons | Saxifragaceae   | <i>Mitella</i>     | <i>Mitella diphylla</i>           | AB492499 |
| Eudicotyledons | Saxifragaceae   | <i>Mitella</i>     | <i>Mitella diphylla</i>           | AB492500 |
| Eudicotyledons | Saxifragaceae   | <i>Mitella</i>     | <i>Mitella nuda</i>               | GU562394 |
| Eudicotyledons | Saxifragaceae   | <i>Mitella</i>     | <i>Mitella nuda</i>               | AB492501 |
| Eudicotyledons | Apiaceae        | <i>Angelica</i>    | <i>Angelica archangelica</i>      | GQ248246 |
| Eudicotyledons | Apiaceae        | <i>Angelica</i>    | <i>Angelica archangelica</i>      | EF590671 |
| Eudicotyledons | Polygonaceae    | <i>Rumex</i>       | <i>Rumex acetosa</i>              | FJ395473 |
| Eudicotyledons | Polygonaceae    | <i>Rumex</i>       | <i>Rumex acetosa</i>              | EU554050 |
| Eudicotyledons | Asteraceae      | <i>Arctotis</i>    | <i>Arctotis stoechadifolia</i>    | EU846451 |
| Eudicotyledons | Asteraceae      | <i>Arctotis</i>    | <i>Arctotis stoechadifolia</i>    | EU846452 |
| Eudicotyledons | Asteraceae      | <i>Centaurea</i>   | <i>Centaurea toletana</i>         | FJ459727 |
| Eudicotyledons | Asteraceae      | <i>Centaurea</i>   | <i>Centaurea toletana</i>         | FJ459728 |
| Eudicotyledons | Asteraceae      | <i>Centaurea</i>   | <i>Centaurea toletana</i>         | FJ459729 |
| Eudicotyledons | Asteraceae      | <i>Cirsium</i>     | <i>Cirsium arvense</i>            | FJ395528 |
| Eudicotyledons | Asteraceae      | <i>Cirsium</i>     | <i>Cirsium arvense</i>            | HQ596645 |
| Eudicotyledons | Asteraceae      | <i>Doniophyton</i> | <i>Doniophyton anomalum</i>       | EU841296 |
| Eudicotyledons | Asteraceae      | <i>Doniophyton</i> | <i>Doniophyton anomalum</i>       | EU841297 |
| Eudicotyledons | Asteraceae      | <i>Haplocarpha</i> | <i>Haplocarpha scaposa</i>        | DQ444780 |
| Eudicotyledons | Asteraceae      | <i>Haplocarpha</i> | <i>Haplocarpha scaposa</i>        | EU846396 |
| Eudicotyledons | Asteraceae      | <i>Santolina</i>   | <i>Santolina chamaecyparissus</i> | JF345726 |
| Eudicotyledons | Asteraceae      | <i>Santolina</i>   | <i>Santolina chamaecyparissus</i> | JF345740 |
| Eudicotyledons | Asteraceae      | <i>Santolina</i>   | <i>Santolina chamaecyparissus</i> | JF345749 |
| Eudicotyledons | Asteraceae      | <i>Santolina</i>   | <i>Santolina chamaecyparissus</i> | JF345757 |
| Eudicotyledons | Asteraceae      | <i>Santolina</i>   | <i>Santolina chamaecyparissus</i> | JF345758 |
| Eudicotyledons | Caryophyllaceae | <i>Silene</i>      | <i>Silene vulgaris</i>            | EF094072 |
| Eudicotyledons | Caryophyllaceae | <i>Silene</i>      | <i>Silene vulgaris</i>            | EF094073 |
| Eudicotyledons | Caryophyllaceae | <i>Silene</i>      | <i>Silene vulgaris</i>            | EF094074 |
| Eudicotyledons | Caryophyllaceae | <i>Silene</i>      | <i>Silene vulgaris</i>            | EF094075 |
| Eudicotyledons | Caryophyllaceae | <i>Silene</i>      | <i>Silene vulgaris</i>            | EF094076 |
| Eudicotyledons | Caryophyllaceae | <i>Silene</i>      | <i>Silene vulgaris</i>            | EF094077 |
| Eudicotyledons | Caryophyllaceae | <i>Silene</i>      | <i>Silene vulgaris</i>            | EF094078 |
| Eudicotyledons | Caryophyllaceae | <i>Silene</i>      | <i>Silene vulgaris</i>            | EF094079 |
| Eudicotyledons | Caryophyllaceae | <i>Silene</i>      | <i>Silene vulgaris</i>            | EF094080 |
| Eudicotyledons | Caryophyllaceae | <i>Silene</i>      | <i>Silene vulgaris</i>            | EF094081 |
| Eudicotyledons | Caryophyllaceae | <i>Silene</i>      | <i>Silene vulgaris</i>            | EF094082 |
| Eudicotyledons | Caryophyllaceae | <i>Silene</i>      | <i>Silene vulgaris</i>            | EF094083 |
| Eudicotyledons | Caryophyllaceae | <i>Silene</i>      | <i>Silene vulgaris</i>            | EF094084 |
| Eudicotyledons | Caryophyllaceae | <i>Silene</i>      | <i>Silene vulgaris</i>            | EF094085 |
| Eudicotyledons | Caryophyllaceae | <i>Silene</i>      | <i>Silene vulgaris</i>            | EF094086 |
| Eudicotyledons | Caryophyllaceae | <i>Silene</i>      | <i>Silene vulgaris</i>            | EF094087 |
| Eudicotyledons | Caryophyllaceae | <i>Silene</i>      | <i>Silene vulgaris</i>            | EF094088 |
| Eudicotyledons | Caryophyllaceae | <i>Silene</i>      | <i>Silene vulgaris</i>            | EF094089 |



|                |                 |                    |                              |          |
|----------------|-----------------|--------------------|------------------------------|----------|
| Eudicotyledons | Caryophyllaceae | <i>Silene</i>      | <i>Silene vulgaris</i>       | AY629295 |
| Eudicotyledons | Caryophyllaceae | <i>Silene</i>      | <i>Silene vulgaris</i>       | AY629296 |
| Eudicotyledons | Caryophyllaceae | <i>Silene</i>      | <i>Silene vulgaris</i>       | AY629297 |
| Eudicotyledons | Caryophyllaceae | <i>Silene</i>      | <i>Silene vulgaris</i>       | EU750548 |
| Eudicotyledons | Caryophyllaceae | <i>Silene</i>      | <i>Silene vulgaris</i>       | EU750549 |
| Eudicotyledons | Caryophyllaceae | <i>Silene</i>      | <i>Silene vulgaris</i>       | EU750550 |
| Eudicotyledons | Caryophyllaceae | <i>Silene</i>      | <i>Silene vulgaris</i>       | EU805570 |
| Eudicotyledons | Caryophyllaceae | <i>Silene</i>      | <i>Silene vulgaris</i>       | EU805571 |
| Eudicotyledons | Caryophyllaceae | <i>Silene</i>      | <i>Silene vulgaris</i>       | EU805572 |
| Eudicotyledons | Caryophyllaceae | <i>Silene</i>      | <i>Silene vulgaris</i>       | EU805573 |
| Eudicotyledons | Caryophyllaceae | <i>Silene</i>      | <i>Silene vulgaris</i>       | EU805574 |
| Eudicotyledons | Rosaceae        | <i>Prunus</i>      | <i>Prunus avium</i>          | FJ395551 |
| Eudicotyledons | Rosaceae        | <i>Prunus</i>      | <i>Prunus avium</i>          | FN675831 |
| Eudicotyledons | Salicaceae      | <i>Populus</i>     | <i>Populus alba</i>          | HE659540 |
| Eudicotyledons | Salicaceae      | <i>Populus</i>     | <i>Populus alba</i>          | GQ248375 |
| Eudicotyledons | Rubiaceae       | <i>Oldenlandia</i> | <i>Oldenlandia corymbosa</i> | JN044771 |
| Eudicotyledons | Rubiaceae       | <i>Oldenlandia</i> | <i>Oldenlandia corymbosa</i> | JN044772 |
| Eudicotyledons | Nitrariaceae    | <i>Peganum</i>     | <i>Peganum harmala</i>       | FJ752656 |
| Eudicotyledons | Nitrariaceae    | <i>Peganum</i>     | <i>Peganum harmala</i>       | FJ752657 |
| Eudicotyledons | Nitrariaceae    | <i>Peganum</i>     | <i>Peganum harmala</i>       | FJ752661 |
| Eudicotyledons | Nitrariaceae    | <i>Peganum</i>     | <i>Peganum harmala</i>       | FJ752664 |
| Eudicotyledons | Nitrariaceae    | <i>Peganum</i>     | <i>Peganum harmala</i>       | FJ752666 |
| Eudicotyledons | Meliaceae       | <i>Cipadessa</i>   | <i>Cipadessa baccifera</i>   | JN044299 |
| Eudicotyledons | Meliaceae       | <i>Cipadessa</i>   | <i>Cipadessa baccifera</i>   | JN044300 |
| Eudicotyledons | Meliaceae       | <i>Cipadessa</i>   | <i>Cipadessa baccifera</i>   | JN044301 |
| Eudicotyledons | Meliaceae       | <i>Cipadessa</i>   | <i>Cipadessa baccifera</i>   | JN044302 |
| Eudicotyledons | Meliaceae       | <i>Cipadessa</i>   | <i>Cipadessa baccifera</i>   | JN044303 |
| Eudicotyledons | Araliaceae      | <i>Panax</i>       | <i>Panax notoginseng</i>     | GQ435399 |
| Eudicotyledons | Araliaceae      | <i>Panax</i>       | <i>Panax notoginseng</i>     | GQ435400 |
| Eudicotyledons | Araliaceae      | <i>Panax</i>       | <i>Panax notoginseng</i>     | GQ435401 |
| Eudicotyledons | Araliaceae      | <i>Panax</i>       | <i>Panax notoginseng</i>     | HQ112882 |
| Eudicotyledons | Araliaceae      | <i>Panax</i>       | <i>Panax notoginseng</i>     | HQ112883 |
| Eudicotyledons | Araliaceae      | <i>Panax</i>       | <i>Panax notoginseng</i>     | HQ112884 |
| Eudicotyledons | Araliaceae      | <i>Panax</i>       | <i>Panax quinquefolius</i>   | GQ435403 |
| Eudicotyledons | Araliaceae      | <i>Panax</i>       | <i>Panax quinquefolius</i>   | HQ112887 |
| Eudicotyledons | Araliaceae      | <i>Panax</i>       | <i>Panax quinquefolius</i>   | HQ112888 |
| Eudicotyledons | Araliaceae      | <i>Panax</i>       | <i>Panax pseudoginseng</i>   | HQ112885 |
| Eudicotyledons | Araliaceae      | <i>Panax</i>       | <i>Panax pseudoginseng</i>   | HQ112886 |
| Eudicotyledons | Araliaceae      | <i>Panax</i>       | <i>Panax stipuleanatus</i>   | HQ112889 |
| Eudicotyledons | Araliaceae      | <i>Panax</i>       | <i>Panax stipuleanatus</i>   | HQ112890 |
| Eudicotyledons | Araliaceae      | <i>Panax</i>       | <i>Panax stipuleanatus</i>   | HQ112891 |
| Eudicotyledons | Araliaceae      | <i>Panax</i>       | <i>Panax stipuleanatus</i>   | HQ112892 |
| Eudicotyledons | Araliaceae      | <i>Panax</i>       | <i>Panax trifolius</i>       | GU054891 |
| Eudicotyledons | Araliaceae      | <i>Panax</i>       | <i>Panax trifolius</i>       | HQ112893 |
| Eudicotyledons | Araliaceae      | <i>Panax</i>       | <i>Panax trifolius</i>       | HQ112894 |
| Eudicotyledons | Araliaceae      | <i>Panax</i>       | <i>Panax japonicus</i>       | GQ435405 |
| Eudicotyledons | Araliaceae      | <i>Panax</i>       | <i>Panax japonicus</i>       | GQ435406 |
| Eudicotyledons | Araliaceae      | <i>Panax</i>       | <i>Panax japonicus</i>       | GQ435407 |
| Eudicotyledons | Araliaceae      | <i>Panax</i>       | <i>Panax japonicus</i>       | HQ112873 |
| Eudicotyledons | Araliaceae      | <i>Panax</i>       | <i>Panax japonicus</i>       | HQ112874 |
| Eudicotyledons | Araliaceae      | <i>Panax</i>       | <i>Panax japonicus</i>       | HQ112875 |
| Eudicotyledons | Araliaceae      | <i>Panax</i>       | <i>Panax japonicus</i>       | HQ112876 |
| Eudicotyledons | Araliaceae      | <i>Panax</i>       | <i>Panax japonicus</i>       | HQ112877 |













|                |            |                    |                                 |          |
|----------------|------------|--------------------|---------------------------------|----------|
| Eudicotyledons | Aceraceae  | <i>Acer</i>        | <i>Acer rubrum</i>              | AY853842 |
| Eudicotyledons | Aceraceae  | <i>Acer</i>        | <i>Acer rubrum</i>              | AY853843 |
| Eudicotyledons | Aceraceae  | <i>Acer</i>        | <i>Acer rubrum</i>              | AY853844 |
| Eudicotyledons | Aceraceae  | <i>Acer</i>        | <i>Acer rubrum</i>              | AY853845 |
| Eudicotyledons | Aceraceae  | <i>Acer</i>        | <i>Acer rubrum</i>              | AY853846 |
| Eudicotyledons | Aceraceae  | <i>Acer</i>        | <i>Acer rubrum</i>              | AY853847 |
| Eudicotyledons | Aceraceae  | <i>Acer</i>        | <i>Acer rubrum</i>              | AY853848 |
| Eudicotyledons | Aceraceae  | <i>Acer</i>        | <i>Acer rubrum</i>              | AY853849 |
| Eudicotyledons | Aceraceae  | <i>Acer</i>        | <i>Acer rubrum</i>              | AY853850 |
| Eudicotyledons | Aceraceae  | <i>Acer</i>        | <i>Acer rubrum</i>              | AY853851 |
| Eudicotyledons | Aceraceae  | <i>Acer</i>        | <i>Acer rubrum</i>              | AY853852 |
| Eudicotyledons | Aceraceae  | <i>Acer</i>        | <i>Acer rubrum</i>              | AY853853 |
| Eudicotyledons | Aceraceae  | <i>Acer</i>        | <i>Acer rubrum</i>              | AY853854 |
| Eudicotyledons | Aceraceae  | <i>Acer</i>        | <i>Acer rubrum</i>              | AY853855 |
| Eudicotyledons | Aceraceae  | <i>Acer</i>        | <i>Acer rubrum</i>              | AY853856 |
| Eudicotyledons | Aceraceae  | <i>Acer</i>        | <i>Acer rubrum</i>              | AY853857 |
| Eudicotyledons | Aceraceae  | <i>Acer</i>        | <i>Acer rubrum</i>              | AY853858 |
| Eudicotyledons | Aceraceae  | <i>Acer</i>        | <i>Acer rubrum</i>              | AY853859 |
| Eudicotyledons | Aceraceae  | <i>Acer</i>        | <i>Acer rubrum</i>              | AY853860 |
| Eudicotyledons | Aceraceae  | <i>Acer</i>        | <i>Acer rubrum</i>              | AY853861 |
| Eudicotyledons | Aceraceae  | <i>Acer</i>        | <i>Acer rubrum</i>              | AY853862 |
| Eudicotyledons | Aceraceae  | <i>Acer</i>        | <i>Acer rubrum</i>              | AY853863 |
| Eudicotyledons | Aceraceae  | <i>Acer</i>        | <i>Acer rubrum</i>              | AY853864 |
| Eudicotyledons | Aceraceae  | <i>Acer</i>        | <i>Acer rubrum</i>              | AY853865 |
| Eudicotyledons | Aceraceae  | <i>Acer</i>        | <i>Acer rubrum</i>              | AY853866 |
| Eudicotyledons | Aceraceae  | <i>Acer</i>        | <i>Acer rubrum</i>              | AY853867 |
| Eudicotyledons | Aceraceae  | <i>Acer</i>        | <i>Acer rubrum</i>              | AY853868 |
| Eudicotyledons | Aceraceae  | <i>Acer</i>        | <i>Acer rubrum</i>              | AY853869 |
| Eudicotyledons | Aceraceae  | <i>Acer</i>        | <i>Acer rubrum</i>              | AY853870 |
| Eudicotyledons | Aceraceae  | <i>Acer</i>        | <i>Acer rubrum</i>              | AY853871 |
| Eudicotyledons | Aceraceae  | <i>Acer</i>        | <i>Acer rubrum</i>              | AY853872 |
| Eudicotyledons | Aceraceae  | <i>Acer</i>        | <i>Acer rubrum</i>              | AY853873 |
| Eudicotyledons | Aceraceae  | <i>Acer</i>        | <i>Acer rubrum</i>              | AY853874 |
| Eudicotyledons | Aceraceae  | <i>Acer</i>        | <i>Acer rubrum</i>              | AY853875 |
| Eudicotyledons | Aceraceae  | <i>Acer</i>        | <i>Acer rubrum</i>              | AY853876 |
| Eudicotyledons | Aceraceae  | <i>Acer</i>        | <i>Acer rubrum</i>              | AY853877 |
| Eudicotyledons | Aceraceae  | <i>Acer</i>        | <i>Acer rubrum</i>              | AY853878 |
| Eudicotyledons | Aceraceae  | <i>Acer</i>        | <i>Acer rubrum</i>              | EU750431 |
| Eudicotyledons | Aceraceae  | <i>Acer</i>        | <i>Acer rubrum</i>              | EU750432 |
| Eudicotyledons | Aceraceae  | <i>Acer</i>        | <i>Acer rubrum</i>              | EU750433 |
| Eudicotyledons | Solanaceae | <i>Solanum</i>     | <i>Solanum dulcamara</i>        | FJ395554 |
| Eudicotyledons | Solanaceae | <i>Solanum</i>     | <i>Solanum dulcamara</i>        | HQ596850 |
| Eudicotyledons | Solanaceae | <i>Solanum</i>     | <i>Solanum dulcamara</i>        | EU750551 |
| Eudicotyledons | Solanaceae | <i>Solanum</i>     | <i>Solanum dulcamara</i>        | EU750552 |
| Eudicotyledons | Solanaceae | <i>Solanum</i>     | <i>Solanum dulcamara</i>        | EU750553 |
| Eudicotyledons | Solanaceae | <i>Solanum</i>     | <i>Solanum dulcamara</i>        | FN675825 |
| Eudicotyledons | Araliaceae | <i>Hydrocotyle</i> | <i>Hydrocotyle verticillata</i> | FM207074 |
| Eudicotyledons | Araliaceae | <i>Hydrocotyle</i> | <i>Hydrocotyle verticillata</i> | FM207075 |
| Eudicotyledons | Araliaceae | <i>Hydrocotyle</i> | <i>Hydrocotyle verticillata</i> | FM207076 |
| Eudicotyledons | Araliaceae | <i>Hydrocotyle</i> | <i>Hydrocotyle verticillata</i> | FM207077 |
| Eudicotyledons | Araliaceae | <i>Hydrocotyle</i> | <i>Hydrocotyle verticillata</i> | FM207078 |
| Eudicotyledons | Fabaceae   | <i>Wisteria</i>    | <i>Wisteria frutescens</i>      | EU424099 |
| Eudicotyledons | Fabaceae   | <i>Wisteria</i>    | <i>Wisteria frutescens</i>      | EU424100 |

|                |                 |                     |                                   |          |
|----------------|-----------------|---------------------|-----------------------------------|----------|
| Eudicotyledons | Aceraceae       | <i>Acer</i>         | <i>Acer takesimense</i>           | DQ978634 |
| Eudicotyledons | Aceraceae       | <i>Acer</i>         | <i>Acer takesimense</i>           | HM352727 |
| Eudicotyledons | Apiaceae        | <i>Angelica</i>     | <i>Angelica dahurica</i>          | GU967808 |
| Eudicotyledons | Apiaceae        | <i>Angelica</i>     | <i>Angelica dahurica</i>          | GQ248247 |
| Eudicotyledons | Apiaceae        | <i>Angelica</i>     | <i>Angelica dahurica</i>          | GQ435303 |
| Eudicotyledons | Apiaceae        | <i>Angelica</i>     | <i>Angelica dahurica</i>          | GQ435304 |
| Eudicotyledons | Apiaceae        | <i>Angelica</i>     | <i>Angelica dahurica</i>          | EF590672 |
| Eudicotyledons | Plantaginaceae  | <i>Antirrhinum</i>  | <i>Antirrhinum hispanicum</i>     | HM152904 |
| Eudicotyledons | Plantaginaceae  | <i>Antirrhinum</i>  | <i>Antirrhinum hispanicum</i>     | HM152905 |
| Eudicotyledons | Plantaginaceae  | <i>Antirrhinum</i>  | <i>Antirrhinum hispanicum</i>     | HM152906 |
| Eudicotyledons | Ericaceae       | <i>Rhododendron</i> | <i>Rhododendron edgeworthii</i>   | JN046798 |
| Eudicotyledons | Ericaceae       | <i>Rhododendron</i> | <i>Rhododendron edgeworthii</i>   | JN046799 |
| Eudicotyledons | Ericaceae       | <i>Rhododendron</i> | <i>Rhododendron edgeworthii</i>   | JN046800 |
| Eudicotyledons | Ericaceae       | <i>Rhododendron</i> | <i>Rhododendron edgeworthii</i>   | JN046801 |
| Eudicotyledons | Ericaceae       | <i>Rhododendron</i> | <i>Rhododendron edgeworthii</i>   | JN046802 |
| Eudicotyledons | Ericaceae       | <i>Rhododendron</i> | <i>Rhododendron edgeworthii</i>   | HQ706962 |
| Eudicotyledons | Ericaceae       | <i>Rhododendron</i> | <i>Rhododendron edgeworthii</i>   | HQ706963 |
| Eudicotyledons | Ericaceae       | <i>Rhododendron</i> | <i>Rhododendron molle</i>         | HQ707000 |
| Eudicotyledons | Ericaceae       | <i>Rhododendron</i> | <i>Rhododendron molle</i>         | HQ707001 |
| Eudicotyledons | Ericaceae       | <i>Rhododendron</i> | <i>Rhododendron molle</i>         | HQ707002 |
| Eudicotyledons | Ericaceae       | <i>Rhododendron</i> | <i>Rhododendron molle</i>         | HQ707003 |
| Eudicotyledons | Ericaceae       | <i>Rhododendron</i> | <i>Rhododendron ovatum</i>        | HQ426989 |
| Eudicotyledons | Ericaceae       | <i>Rhododendron</i> | <i>Rhododendron ovatum</i>        | JN046915 |
| Eudicotyledons | Ericaceae       | <i>Rhododendron</i> | <i>Rhododendron ovatum</i>        | JN046916 |
| Eudicotyledons | Ericaceae       | <i>Rhododendron</i> | <i>Rhododendron ferrugineum</i>   | HE585249 |
| Eudicotyledons | Ericaceae       | <i>Rhododendron</i> | <i>Rhododendron ferrugineum</i>   | HE585250 |
| Eudicotyledons | Ericaceae       | <i>Rhododendron</i> | <i>Rhododendron ferrugineum</i>   | HE585251 |
| Eudicotyledons | Ericaceae       | <i>Rhododendron</i> | <i>Rhododendron moulmainsense</i> | JN046890 |
| Eudicotyledons | Ericaceae       | <i>Rhododendron</i> | <i>Rhododendron moulmainsense</i> | JN046891 |
| Eudicotyledons | Ericaceae       | <i>Rhododendron</i> | <i>Rhododendron moulmainsense</i> | JN046892 |
| Eudicotyledons | Ericaceae       | <i>Rhododendron</i> | <i>Rhododendron moulmainsense</i> | JN046893 |
| Eudicotyledons | Ericaceae       | <i>Rhododendron</i> | <i>Rhododendron moulmainsense</i> | HQ707004 |
| Eudicotyledons | Gentianaceae    | <i>Swertia</i>      | <i>Swertia franchetiana</i>       | JN047284 |
| Eudicotyledons | Gentianaceae    | <i>Swertia</i>      | <i>Swertia franchetiana</i>       | JN047285 |
| Eudicotyledons | Gentianaceae    | <i>Swertia</i>      | <i>Swertia franchetiana</i>       | JN047286 |
| Eudicotyledons | Gentianaceae    | <i>Swertia</i>      | <i>Swertia tetraptera</i>         | JN047299 |
| Eudicotyledons | Gentianaceae    | <i>Swertia</i>      | <i>Swertia tetraptera</i>         | JN047300 |
| Eudicotyledons | Apiaceae        | <i>Angelica</i>     | <i>Angelica decursiva</i>         | GQ435318 |
| Eudicotyledons | Apiaceae        | <i>Angelica</i>     | <i>Angelica decursiva</i>         | GQ435319 |
| Eudicotyledons | Aquifoliaceae   | <i>Ilex</i>         | <i>Ilex latifolia</i>             | HQ426980 |
| Eudicotyledons | Aquifoliaceae   | <i>Ilex</i>         | <i>Ilex latifolia</i>             | EU359318 |
| Eudicotyledons | Aquifoliaceae   | <i>Ilex</i>         | <i>Ilex latifolia</i>             | JN044947 |
| Eudicotyledons | Aquifoliaceae   | <i>Ilex</i>         | <i>Ilex latifolia</i>             | JN044948 |
| Eudicotyledons | Aquifoliaceae   | <i>Ilex</i>         | <i>Ilex latifolia</i>             | JN044949 |
| Eudicotyledons | Aquifoliaceae   | <i>Ilex</i>         | <i>Ilex latifolia</i>             | JN044950 |
| Eudicotyledons | Aquifoliaceae   | <i>Ilex</i>         | <i>Ilex rotunda</i>               | HQ415422 |
| Eudicotyledons | Aquifoliaceae   | <i>Ilex</i>         | <i>Ilex rotunda</i>               | JN406924 |
| Eudicotyledons | Geraniaceae     | <i>Geranium</i>     | <i>Geranium nepalense</i>         | JN044739 |
| Eudicotyledons | Geraniaceae     | <i>Geranium</i>     | <i>Geranium nepalense</i>         | JN044740 |
| Eudicotyledons | Geraniaceae     | <i>Geranium</i>     | <i>Geranium nepalense</i>         | JN044741 |
| Eudicotyledons | Caryophyllaceae | <i>Silene</i>       | <i>Silene baccifera</i>           | JN047113 |
| Eudicotyledons | Caryophyllaceae | <i>Silene</i>       | <i>Silene baccifera</i>           | JN047114 |
| Eudicotyledons | Caryophyllaceae | <i>Silene</i>       | <i>Silene baccifera</i>           | JN047115 |

|                |                 |                  |                               |          |
|----------------|-----------------|------------------|-------------------------------|----------|
| Eudicotyledons | Caryophyllaceae | <i>Silene</i>    | <i>Silene baccifera</i>       | JN047116 |
| Eudicotyledons | Caryophyllaceae | <i>Silene</i>    | <i>Silene baccifera</i>       | JN047117 |
| Eudicotyledons | Caryophyllaceae | <i>Silene</i>    | <i>Silene aprica</i>          | JN047101 |
| Eudicotyledons | Caryophyllaceae | <i>Silene</i>    | <i>Silene aprica</i>          | JN047102 |
| Eudicotyledons | Caryophyllaceae | <i>Silene</i>    | <i>Silene aprica</i>          | JN047103 |
| Eudicotyledons | Caryophyllaceae | <i>Silene</i>    | <i>Silene aprica</i>          | JN047104 |
| Eudicotyledons | Caryophyllaceae | <i>Silene</i>    | <i>Silene aprica</i>          | JN047105 |
| Eudicotyledons | Caryophyllaceae | <i>Silene</i>    | <i>Silene aprica</i>          | JN047106 |
| Eudicotyledons | Caryophyllaceae | <i>Silene</i>    | <i>Silene aprica</i>          | JN047107 |
| Eudicotyledons | Caryophyllaceae | <i>Silene</i>    | <i>Silene aprica</i>          | JN047108 |
| Eudicotyledons | Caryophyllaceae | <i>Silene</i>    | <i>Silene aprica</i>          | JN047109 |
| Eudicotyledons | Caryophyllaceae | <i>Silene</i>    | <i>Silene aprica</i>          | JN047110 |
| Eudicotyledons | Caryophyllaceae | <i>Silene</i>    | <i>Silene aprica</i>          | JN047111 |
| Eudicotyledons | Caryophyllaceae | <i>Silene</i>    | <i>Silene aprica</i>          | JN047112 |
| Eudicotyledons | Balsaminaceae   | <i>Impatiens</i> | <i>Impatiens capensis</i>     | HQ596732 |
| Eudicotyledons | Balsaminaceae   | <i>Impatiens</i> | <i>Impatiens capensis</i>     | DQ006157 |
| Eudicotyledons | Asteraceae      | <i>Inula</i>     | <i>Inula helenium</i>         | HQ596733 |
| Eudicotyledons | Asteraceae      | <i>Inula</i>     | <i>Inula helenium</i>         | HQ596734 |
| Eudicotyledons | Asteraceae      | <i>Inula</i>     | <i>Inula helenium</i>         | FM998672 |
| Eudicotyledons | Oleaceae        | <i>Fraxinus</i>  | <i>Fraxinus mandshurica</i>   | HM367487 |
| Eudicotyledons | Oleaceae        | <i>Fraxinus</i>  | <i>Fraxinus mandshurica</i>   | HM367488 |
| Eudicotyledons | Oleaceae        | <i>Fraxinus</i>  | <i>Fraxinus mandshurica</i>   | HM367489 |
| Eudicotyledons | Oleaceae        | <i>Fraxinus</i>  | <i>Fraxinus mandshurica</i>   | HM367490 |
| Eudicotyledons | Oleaceae        | <i>Fraxinus</i>  | <i>Fraxinus mandshurica</i>   | HM367491 |
| Eudicotyledons | Oleaceae        | <i>Fraxinus</i>  | <i>Fraxinus mandshurica</i>   | HM367492 |
| Eudicotyledons | Oleaceae        | <i>Fraxinus</i>  | <i>Fraxinus mandshurica</i>   | HM367493 |
| Eudicotyledons | Oleaceae        | <i>Fraxinus</i>  | <i>Fraxinus mandshurica</i>   | HM367494 |
| Eudicotyledons | Oleaceae        | <i>Fraxinus</i>  | <i>Fraxinus mandshurica</i>   | HM367495 |
| Eudicotyledons | Oleaceae        | <i>Fraxinus</i>  | <i>Fraxinus platypoda</i>     | HM367513 |
| Eudicotyledons | Oleaceae        | <i>Fraxinus</i>  | <i>Fraxinus platypoda</i>     | HM367514 |
| Eudicotyledons | Oleaceae        | <i>Fraxinus</i>  | <i>Fraxinus platypoda</i>     | HM367515 |
| Eudicotyledons | Oleaceae        | <i>Fraxinus</i>  | <i>Fraxinus platypoda</i>     | HM367516 |
| Eudicotyledons | Oleaceae        | <i>Fraxinus</i>  | <i>Fraxinus platypoda</i>     | HM367517 |
| Eudicotyledons | Oleaceae        | <i>Fraxinus</i>  | <i>Fraxinus platypoda</i>     | HM367518 |
| Eudicotyledons | Oleaceae        | <i>Fraxinus</i>  | <i>Fraxinus platypoda</i>     | HM367519 |
| Eudicotyledons | Oleaceae        | <i>Fraxinus</i>  | <i>Fraxinus platypoda</i>     | HM367520 |
| Eudicotyledons | Oleaceae        | <i>Fraxinus</i>  | <i>Fraxinus platypoda</i>     | HM367521 |
| Eudicotyledons | Oleaceae        | <i>Fraxinus</i>  | <i>Fraxinus platypoda</i>     | HM367522 |
| Eudicotyledons | Oleaceae        | <i>Fraxinus</i>  | <i>Fraxinus platypoda</i>     | HM367523 |
| Eudicotyledons | Oleaceae        | <i>Fraxinus</i>  | <i>Fraxinus platypoda</i>     | HM367524 |
| Eudicotyledons | Oleaceae        | <i>Fraxinus</i>  | <i>Fraxinus nigra</i>         | HQ596702 |
| Eudicotyledons | Oleaceae        | <i>Fraxinus</i>  | <i>Fraxinus nigra</i>         | HM367497 |
| Eudicotyledons | Oleaceae        | <i>Fraxinus</i>  | <i>Fraxinus nigra</i>         | HM367498 |
| Eudicotyledons | Oleaceae        | <i>Fraxinus</i>  | <i>Fraxinus quadrangulata</i> | HM367531 |
| Eudicotyledons | Oleaceae        | <i>Fraxinus</i>  | <i>Fraxinus quadrangulata</i> | HM367532 |
| Eudicotyledons | Oleaceae        | <i>Fraxinus</i>  | <i>Fraxinus chinensis</i>     | GQ435221 |
| Eudicotyledons | Oleaceae        | <i>Fraxinus</i>  | <i>Fraxinus chinensis</i>     | HM367402 |
| Eudicotyledons | Oleaceae        | <i>Fraxinus</i>  | <i>Fraxinus chinensis</i>     | HM367403 |
| Eudicotyledons | Oleaceae        | <i>Fraxinus</i>  | <i>Fraxinus chinensis</i>     | HM367404 |
| Eudicotyledons | Oleaceae        | <i>Fraxinus</i>  | <i>Fraxinus chinensis</i>     | HM367405 |
| Eudicotyledons | Oleaceae        | <i>Fraxinus</i>  | <i>Fraxinus chinensis</i>     | HM367406 |
| Eudicotyledons | Oleaceae        | <i>Fraxinus</i>  | <i>Fraxinus chinensis</i>     | HM367407 |
| Eudicotyledons | Oleaceae        | <i>Fraxinus</i>  | <i>Fraxinus chinensis</i>     | HM367408 |

|                |            |                 |                               |          |
|----------------|------------|-----------------|-------------------------------|----------|
| Eudicotyledons | Oleaceae   | <i>Fraxinus</i> | <i>Fraxinus chinensis</i>     | HM367409 |
| Eudicotyledons | Oleaceae   | <i>Fraxinus</i> | <i>Fraxinus longicuspis</i>   | HM367472 |
| Eudicotyledons | Oleaceae   | <i>Fraxinus</i> | <i>Fraxinus longicuspis</i>   | HM367473 |
| Eudicotyledons | Oleaceae   | <i>Fraxinus</i> | <i>Fraxinus longicuspis</i>   | HM367474 |
| Eudicotyledons | Oleaceae   | <i>Fraxinus</i> | <i>Fraxinus longicuspis</i>   | HM367475 |
| Eudicotyledons | Oleaceae   | <i>Fraxinus</i> | <i>Fraxinus longicuspis</i>   | HM367476 |
| Eudicotyledons | Oleaceae   | <i>Fraxinus</i> | <i>Fraxinus longicuspis</i>   | HM367477 |
| Eudicotyledons | Oleaceae   | <i>Fraxinus</i> | <i>Fraxinus longicuspis</i>   | HM367478 |
| Eudicotyledons | Oleaceae   | <i>Fraxinus</i> | <i>Fraxinus longicuspis</i>   | HM367479 |
| Eudicotyledons | Oleaceae   | <i>Fraxinus</i> | <i>Fraxinus longicuspis</i>   | HM367480 |
| Eudicotyledons | Oleaceae   | <i>Fraxinus</i> | <i>Fraxinus longicuspis</i>   | HM367481 |
| Eudicotyledons | Oleaceae   | <i>Fraxinus</i> | <i>Fraxinus longicuspis</i>   | HM367482 |
| Eudicotyledons | Oleaceae   | <i>Fraxinus</i> | <i>Fraxinus longicuspis</i>   | HM367483 |
| Eudicotyledons | Oleaceae   | <i>Fraxinus</i> | <i>Fraxinus longicuspis</i>   | HM367484 |
| Eudicotyledons | Oleaceae   | <i>Fraxinus</i> | <i>Fraxinus pennsylvanica</i> | HQ596703 |
| Eudicotyledons | Oleaceae   | <i>Fraxinus</i> | <i>Fraxinus pennsylvanica</i> | HM367511 |
| Eudicotyledons | Oleaceae   | <i>Fraxinus</i> | <i>Fraxinus pennsylvanica</i> | HM367512 |
| Eudicotyledons | Oleaceae   | <i>Fraxinus</i> | <i>Fraxinus tomentosa</i>     | HM367560 |
| Eudicotyledons | Oleaceae   | <i>Fraxinus</i> | <i>Fraxinus tomentosa</i>     | HM367561 |
| Eudicotyledons | Oleaceae   | <i>Fraxinus</i> | <i>Fraxinus tomentosa</i>     | HM367562 |
| Eudicotyledons | Oleaceae   | <i>Fraxinus</i> | <i>Fraxinus tomentosa</i>     | HM367563 |
| Eudicotyledons | Oleaceae   | <i>Fraxinus</i> | <i>Fraxinus tomentosa</i>     | HM367564 |
| Eudicotyledons | Oleaceae   | <i>Fraxinus</i> | <i>Fraxinus velutina</i>      | HM367571 |
| Eudicotyledons | Oleaceae   | <i>Fraxinus</i> | <i>Fraxinus velutina</i>      | HM367572 |
| Eudicotyledons | Oleaceae   | <i>Fraxinus</i> | <i>Fraxinus velutina</i>      | HM367573 |
| Eudicotyledons | Oleaceae   | <i>Fraxinus</i> | <i>Fraxinus velutina</i>      | HM367574 |
| Eudicotyledons | Oleaceae   | <i>Fraxinus</i> | <i>Fraxinus velutina</i>      | HM367575 |
| Eudicotyledons | Oleaceae   | <i>Fraxinus</i> | <i>Fraxinus velutina</i>      | HM367576 |
| Eudicotyledons | Oleaceae   | <i>Fraxinus</i> | <i>Fraxinus velutina</i>      | HM367577 |
| Eudicotyledons | Oleaceae   | <i>Fraxinus</i> | <i>Fraxinus velutina</i>      | HM367578 |
| Eudicotyledons | Oleaceae   | <i>Fraxinus</i> | <i>Fraxinus velutina</i>      | HM367579 |
| Eudicotyledons | Oleaceae   | <i>Fraxinus</i> | <i>Fraxinus biltmoreana</i>   | HM367392 |
| Eudicotyledons | Oleaceae   | <i>Fraxinus</i> | <i>Fraxinus biltmoreana</i>   | HM367393 |
| Eudicotyledons | Oleaceae   | <i>Fraxinus</i> | <i>Fraxinus latifolia</i>     | HM367467 |
| Eudicotyledons | Oleaceae   | <i>Fraxinus</i> | <i>Fraxinus latifolia</i>     | HM367468 |
| Eudicotyledons | Oleaceae   | <i>Fraxinus</i> | <i>Fraxinus latifolia</i>     | HM367469 |
| Eudicotyledons | Oleaceae   | <i>Fraxinus</i> | <i>Fraxinus latifolia</i>     | HM367470 |
| Eudicotyledons | Oleaceae   | <i>Fraxinus</i> | <i>Fraxinus latifolia</i>     | HM367471 |
| Eudicotyledons | Oleaceae   | <i>Fraxinus</i> | <i>Fraxinus anomala</i>       | HM367379 |
| Eudicotyledons | Oleaceae   | <i>Fraxinus</i> | <i>Fraxinus anomala</i>       | HM367380 |
| Eudicotyledons | Oleaceae   | <i>Fraxinus</i> | <i>Fraxinus cuspidata</i>     | HM367410 |
| Eudicotyledons | Oleaceae   | <i>Fraxinus</i> | <i>Fraxinus cuspidata</i>     | HM367411 |
| Eudicotyledons | Oleaceae   | <i>Fraxinus</i> | <i>Fraxinus cuspidata</i>     | HM367412 |
| Eudicotyledons | Oleaceae   | <i>Fraxinus</i> | <i>Fraxinus cuspidata</i>     | HM367413 |
| Eudicotyledons | Oleaceae   | <i>Fraxinus</i> | <i>Fraxinus cuspidata</i>     | HM367414 |
| Eudicotyledons | Asteraceae | <i>Inula</i>    | <i>Inula salicina</i>         | FR865070 |
| Eudicotyledons | Asteraceae | <i>Inula</i>    | <i>Inula salicina</i>         | FM998675 |
| Eudicotyledons | Adoxaceae  | <i>Sambucus</i> | <i>Sambucus canadensis</i>    | HQ596833 |
| Eudicotyledons | Adoxaceae  | <i>Sambucus</i> | <i>Sambucus canadensis</i>    | AY627425 |
| Eudicotyledons | Adoxaceae  | <i>Sambucus</i> | <i>Sambucus adnata</i>        | JN047058 |
| Eudicotyledons | Adoxaceae  | <i>Sambucus</i> | <i>Sambucus adnata</i>        | JN047059 |
| Eudicotyledons | Adoxaceae  | <i>Sambucus</i> | <i>Sambucus adnata</i>        | JN047060 |
| Eudicotyledons | Adoxaceae  | <i>Sambucus</i> | <i>Sambucus adnata</i>        | JN047061 |

|                |                |                    |                               |          |
|----------------|----------------|--------------------|-------------------------------|----------|
| Eudicotyledons | Adoxaceae      | <i>Sambucus</i>    | <i>Sambucus adnata</i>        | JN047062 |
| Eudicotyledons | Adoxaceae      | <i>Sambucus</i>    | <i>Sambucus adnata</i>        | JN047063 |
| Eudicotyledons | Adoxaceae      | <i>Sambucus</i>    | <i>Sambucus adnata</i>        | JN047064 |
| Eudicotyledons | Adoxaceae      | <i>Sambucus</i>    | <i>Sambucus adnata</i>        | JN047065 |
| Eudicotyledons | Adoxaceae      | <i>Sambucus</i>    | <i>Sambucus adnata</i>        | JN047066 |
| Eudicotyledons | Adoxaceae      | <i>Sambucus</i>    | <i>Sambucus adnata</i>        | JN047067 |
| Eudicotyledons | Adoxaceae      | <i>Sambucus</i>    | <i>Sambucus adnata</i>        | JN047068 |
| Eudicotyledons | Fabaceae       | <i>Trifolium</i>   | <i>Trifolium pratense</i>     | FJ395480 |
| Eudicotyledons | Fabaceae       | <i>Trifolium</i>   | <i>Trifolium pratense</i>     | EU750597 |
| Eudicotyledons | Fabaceae       | <i>Trifolium</i>   | <i>Trifolium pratense</i>     | EU750598 |
| Eudicotyledons | Fabaceae       | <i>Trifolium</i>   | <i>Trifolium pratense</i>     | EU750599 |
| Eudicotyledons | Aceraceae      | <i>Acer</i>        | <i>Acer tataricum</i>         | JN043729 |
| Eudicotyledons | Aceraceae      | <i>Acer</i>        | <i>Acer tataricum</i>         | JN043730 |
| Eudicotyledons | Aceraceae      | <i>Acer</i>        | <i>Acer spicatum</i>          | DQ978632 |
| Eudicotyledons | Aceraceae      | <i>Acer</i>        | <i>Acer spicatum</i>          | HQ596579 |
| Eudicotyledons | Aceraceae      | <i>Acer</i>        | <i>Acer tegmentosum</i>       | DQ978637 |
| Eudicotyledons | Aceraceae      | <i>Acer</i>        | <i>Acer tegmentosum</i>       | HM008584 |
| Eudicotyledons | Cornaceae      | <i>Cornus</i>      | <i>Cornus nuttallii</i>       | FJ541997 |
| Eudicotyledons | Cornaceae      | <i>Cornus</i>      | <i>Cornus nuttallii</i>       | JF321205 |
| Eudicotyledons | Adoxaceae      | <i>Viburnum</i>    | <i>Viburnum lentago</i>       | HQ596888 |
| Eudicotyledons | Adoxaceae      | <i>Viburnum</i>    | <i>Viburnum lentago</i>       | AY627406 |
| Eudicotyledons | Adoxaceae      | <i>Viburnum</i>    | <i>Viburnum lentago</i>       | EU750609 |
| Eudicotyledons | Adoxaceae      | <i>Viburnum</i>    | <i>Viburnum lentago</i>       | EU750610 |
| Eudicotyledons | Cucurbitaceae  | <i>Bryonia</i>     | <i>Bryonia cretica</i>        | EU096340 |
| Eudicotyledons | Cucurbitaceae  | <i>Bryonia</i>     | <i>Bryonia cretica</i>        | EU096341 |
| Eudicotyledons | Cucurbitaceae  | <i>Bryonia</i>     | <i>Bryonia cretica</i>        | EU096342 |
| Eudicotyledons | Cucurbitaceae  | <i>Bryonia</i>     | <i>Bryonia cretica</i>        | EU096343 |
| Eudicotyledons | Cucurbitaceae  | <i>Bryonia</i>     | <i>Bryonia cretica</i>        | EU096344 |
| Eudicotyledons | Cucurbitaceae  | <i>Bryonia</i>     | <i>Bryonia cretica</i>        | EU096345 |
| Eudicotyledons | Cucurbitaceae  | <i>Bryonia</i>     | <i>Bryonia cretica</i>        | EU096346 |
| Eudicotyledons | Cucurbitaceae  | <i>Bryonia</i>     | <i>Bryonia cretica</i>        | EU096347 |
| Eudicotyledons | Cucurbitaceae  | <i>Bryonia</i>     | <i>Bryonia cretica</i>        | EU096405 |
| Eudicotyledons | Cucurbitaceae  | <i>Bryonia</i>     | <i>Bryonia cretica</i>        | EU096406 |
| Eudicotyledons | Hamamelidaceae | <i>Hamamelis</i>   | <i>Hamamelis japonica</i>     | GU576755 |
| Eudicotyledons | Hamamelidaceae | <i>Hamamelis</i>   | <i>Hamamelis japonica</i>     | GU576756 |
| Eudicotyledons | Hamamelidaceae | <i>Hamamelis</i>   | <i>Hamamelis japonica</i>     | GU576757 |
| Eudicotyledons | Hamamelidaceae | <i>Hamamelis</i>   | <i>Hamamelis japonica</i>     | GU576758 |
| Eudicotyledons | Hamamelidaceae | <i>Hamamelis</i>   | <i>Hamamelis vernalis</i>     | GU576764 |
| Eudicotyledons | Hamamelidaceae | <i>Hamamelis</i>   | <i>Hamamelis vernalis</i>     | GU576765 |
| Eudicotyledons | Hamamelidaceae | <i>Hamamelis</i>   | <i>Hamamelis vernalis</i>     | GU576766 |
| Eudicotyledons | Hamamelidaceae | <i>Hamamelis</i>   | <i>Hamamelis vernalis</i>     | GU576767 |
| Eudicotyledons | Hamamelidaceae | <i>Hamamelis</i>   | <i>Hamamelis vernalis</i>     | GU576768 |
| Eudicotyledons | Altingiaceae   | <i>Liquidambar</i> | <i>Liquidambar acalycina</i>  | GU576771 |
| Eudicotyledons | Altingiaceae   | <i>Liquidambar</i> | <i>Liquidambar acalycina</i>  | EU595860 |
| Eudicotyledons | Altingiaceae   | <i>Liquidambar</i> | <i>Liquidambar formosana</i>  | GU576772 |
| Eudicotyledons | Altingiaceae   | <i>Liquidambar</i> | <i>Liquidambar formosana</i>  | HQ427006 |
| Eudicotyledons | Altingiaceae   | <i>Liquidambar</i> | <i>Liquidambar formosana</i>  | GQ435052 |
| Eudicotyledons | Altingiaceae   | <i>Liquidambar</i> | <i>Liquidambar formosana</i>  | EU595861 |
| Eudicotyledons | Altingiaceae   | <i>Liquidambar</i> | <i>Liquidambar formosana</i>  | EF138730 |
| Eudicotyledons | Altingiaceae   | <i>Liquidambar</i> | <i>Liquidambar orientalis</i> | EU595855 |
| Eudicotyledons | Altingiaceae   | <i>Liquidambar</i> | <i>Liquidambar orientalis</i> | EF138729 |
| Eudicotyledons | Balsaminaceae  | <i>Impatiens</i>   | <i>Impatiens balsamina</i>    | GQ434995 |
| Eudicotyledons | Balsaminaceae  | <i>Impatiens</i>   | <i>Impatiens balsamina</i>    | EF590706 |

|                |               |                    |                                |          |
|----------------|---------------|--------------------|--------------------------------|----------|
| Eudicotyledons | Rosaceae      | <i>Fragaria</i>    | <i>Fragaria moschata</i>       | GQ476762 |
| Eudicotyledons | Rosaceae      | <i>Fragaria</i>    | <i>Fragaria moschata</i>       | GQ476763 |
| Eudicotyledons | Rosaceae      | <i>Fragaria</i>    | <i>Fragaria moschata</i>       | GQ476764 |
| Eudicotyledons | Orobanchaceae | <i>Pedicularis</i> | <i>Pedicularis resupinata</i>  | JN046091 |
| Eudicotyledons | Orobanchaceae | <i>Pedicularis</i> | <i>Pedicularis resupinata</i>  | JN046092 |
| Eudicotyledons | Orobanchaceae | <i>Pedicularis</i> | <i>Pedicularis resupinata</i>  | JN046093 |
| Eudicotyledons | Lamiaceae     | <i>Scutellaria</i> | <i>Scutellaria baicalensis</i> | GQ374140 |
| Eudicotyledons | Lamiaceae     | <i>Scutellaria</i> | <i>Scutellaria baicalensis</i> | GQ374141 |
| Eudicotyledons | Lamiaceae     | <i>Scutellaria</i> | <i>Scutellaria baicalensis</i> | GQ374142 |
| Eudicotyledons | Lamiaceae     | <i>Scutellaria</i> | <i>Scutellaria baicalensis</i> | GQ374143 |
| Eudicotyledons | Lamiaceae     | <i>Scutellaria</i> | <i>Scutellaria baicalensis</i> | GQ374144 |
| Eudicotyledons | Lamiaceae     | <i>Scutellaria</i> | <i>Scutellaria baicalensis</i> | GQ374145 |
| Eudicotyledons | Lamiaceae     | <i>Scutellaria</i> | <i>Scutellaria baicalensis</i> | GQ374146 |
| Eudicotyledons | Lamiaceae     | <i>Scutellaria</i> | <i>Scutellaria baicalensis</i> | GQ374147 |
| Eudicotyledons | Lamiaceae     | <i>Scutellaria</i> | <i>Scutellaria baicalensis</i> | GQ374148 |
| Eudicotyledons | Lamiaceae     | <i>Scutellaria</i> | <i>Scutellaria baicalensis</i> | GQ374149 |
| Eudicotyledons | Lamiaceae     | <i>Scutellaria</i> | <i>Scutellaria baicalensis</i> | GQ374150 |
| Eudicotyledons | Lamiaceae     | <i>Scutellaria</i> | <i>Scutellaria baicalensis</i> | GQ374151 |
| Eudicotyledons | Lamiaceae     | <i>Scutellaria</i> | <i>Scutellaria baicalensis</i> | EU590864 |
| Eudicotyledons | Lamiaceae     | <i>Scutellaria</i> | <i>Scutellaria baicalensis</i> | HQ680364 |
| Eudicotyledons | Lamiaceae     | <i>Scutellaria</i> | <i>Scutellaria baicalensis</i> | HQ680365 |
| Eudicotyledons | Lamiaceae     | <i>Scutellaria</i> | <i>Scutellaria baicalensis</i> | HQ680366 |
| Eudicotyledons | Aceraceae     | <i>Acer</i>        | <i>Acer palmatum</i>           | DQ978615 |
| Eudicotyledons | Aceraceae     | <i>Acer</i>        | <i>Acer palmatum</i>           | HM352723 |
| Eudicotyledons | Aceraceae     | <i>Acer</i>        | <i>Acer crataegifolium</i>     | DQ978593 |
| Eudicotyledons | Aceraceae     | <i>Acer</i>        | <i>Acer crataegifolium</i>     | HM008572 |
| Eudicotyledons | Aceraceae     | <i>Acer</i>        | <i>Acer tschonoskii</i>        | DQ978641 |
| Eudicotyledons | Aceraceae     | <i>Acer</i>        | <i>Acer tschonoskii</i>        | HM008585 |
| Eudicotyledons | Asteraceae    | <i>Centaurea</i>   | <i>Centaurea vallesiaca</i>    | DQ846171 |
| Eudicotyledons | Asteraceae    | <i>Centaurea</i>   | <i>Centaurea vallesiaca</i>    | DQ846172 |
| Eudicotyledons | Asteraceae    | <i>Centaurea</i>   | <i>Centaurea vallesiaca</i>    | DQ846173 |
| Eudicotyledons | Asteraceae    | <i>Centaurea</i>   | <i>Centaurea vallesiaca</i>    | DQ846174 |
| Eudicotyledons | Asteraceae    | <i>Centaurea</i>   | <i>Centaurea vallesiaca</i>    | DQ846175 |
| Eudicotyledons | Asteraceae    | <i>Centaurea</i>   | <i>Centaurea vallesiaca</i>    | DQ846176 |
| Eudicotyledons | Asteraceae    | <i>Centaurea</i>   | <i>Centaurea vallesiaca</i>    | DQ846177 |
| Eudicotyledons | Asteraceae    | <i>Centaurea</i>   | <i>Centaurea vallesiaca</i>    | DQ846178 |
| Eudicotyledons | Asteraceae    | <i>Centaurea</i>   | <i>Centaurea vallesiaca</i>    | DQ846179 |
| Eudicotyledons | Asteraceae    | <i>Centaurea</i>   | <i>Centaurea vallesiaca</i>    | DQ846207 |
| Eudicotyledons | Asteraceae    | <i>Centaurea</i>   | <i>Centaurea vallesiaca</i>    | DQ846208 |
| Eudicotyledons | Asteraceae    | <i>Centaurea</i>   | <i>Centaurea vallesiaca</i>    | DQ846209 |
| Eudicotyledons | Asteraceae    | <i>Centaurea</i>   | <i>Centaurea vallesiaca</i>    | DQ846267 |
| Eudicotyledons | Asteraceae    | <i>Centaurea</i>   | <i>Centaurea vallesiaca</i>    | DQ846268 |
| Eudicotyledons | Asteraceae    | <i>Centaurea</i>   | <i>Centaurea vallesiaca</i>    | DQ846269 |
| Eudicotyledons | Asteraceae    | <i>Centaurea</i>   | <i>Centaurea vallesiaca</i>    | DQ846270 |
| Eudicotyledons | Asteraceae    | <i>Centaurea</i>   | <i>Centaurea vallesiaca</i>    | DQ846271 |
| Eudicotyledons | Asteraceae    | <i>Centaurea</i>   | <i>Centaurea vallesiaca</i>    | DQ846272 |
| Eudicotyledons | Asteraceae    | <i>Erigeron</i>    | <i>Erigeron philadelphicus</i> | HQ596689 |
| Eudicotyledons | Asteraceae    | <i>Erigeron</i>    | <i>Erigeron philadelphicus</i> | HQ596690 |
| Eudicotyledons | Salicaceae    | <i>Populus</i>     | <i>Populus balsamifera</i>     | GU562411 |
| Eudicotyledons | Salicaceae    | <i>Populus</i>     | <i>Populus balsamifera</i>     | EU750495 |
| Eudicotyledons | Salicaceae    | <i>Populus</i>     | <i>Populus balsamifera</i>     | EU750496 |
| Eudicotyledons | Rosaceae      | <i>Rosa</i>        | <i>Rosa gallica</i>            | DQ778773 |
| Eudicotyledons | Rosaceae      | <i>Rosa</i>        | <i>Rosa gallica</i>            | AB043947 |

|                |                |                     |                                   |          |
|----------------|----------------|---------------------|-----------------------------------|----------|
| Eudicotyledons | Rosaceae       | <i>Rosa</i>         | <i>Rosa canina</i>                | DQ778759 |
| Eudicotyledons | Rosaceae       | <i>Rosa</i>         | <i>Rosa canina</i>                | FJ395548 |
| Eudicotyledons | Rosaceae       | <i>Rosa</i>         | <i>Rosa carolina</i>              | DQ778760 |
| Eudicotyledons | Rosaceae       | <i>Rosa</i>         | <i>Rosa carolina</i>              | DQ778761 |
| Eudicotyledons | Rosaceae       | <i>Rosa</i>         | <i>Rosa blanda</i>                | DQ778753 |
| Eudicotyledons | Rosaceae       | <i>Rosa</i>         | <i>Rosa blanda</i>                | DQ778779 |
| Eudicotyledons | Rosaceae       | <i>Rosa</i>         | <i>Rosa blanda</i>                | DQ778803 |
| Eudicotyledons | Rosaceae       | <i>Rosa</i>         | <i>Rosa blanda</i>                | HQ596822 |
| Eudicotyledons | Rosaceae       | <i>Rosa</i>         | <i>Rosa californica</i>           | DQ778757 |
| Eudicotyledons | Rosaceae       | <i>Rosa</i>         | <i>Rosa californica</i>           | DQ778758 |
| Eudicotyledons | Rosaceae       | <i>Rosa</i>         | <i>Rosa moschata</i>              | DQ778789 |
| Eudicotyledons | Rosaceae       | <i>Rosa</i>         | <i>Rosa moschata</i>              | AB043948 |
| Eudicotyledons | Rosaceae       | <i>Rosa</i>         | <i>Rosa moschata</i>              | AB043949 |
| Eudicotyledons | Rosaceae       | <i>Rosa</i>         | <i>Rosa moschata</i>              | AB043951 |
| Eudicotyledons | Rosaceae       | <i>Rosa</i>         | <i>Rosa moschata</i>              | AB043952 |
| Eudicotyledons | Rosaceae       | <i>Rosa</i>         | <i>Rosa lucieae</i>               | DQ778811 |
| Eudicotyledons | Rosaceae       | <i>Rosa</i>         | <i>Rosa lucieae</i>               | DQ778812 |
| Eudicotyledons | Plantaginaceae | <i>Veronica</i>     | <i>Veronica densifolia</i>        | FJ848125 |
| Eudicotyledons | Plantaginaceae | <i>Veronica</i>     | <i>Veronica densifolia</i>        | FJ848126 |
| Eudicotyledons | Plantaginaceae | <i>Veronica</i>     | <i>Veronica macrantha</i>         | FJ848136 |
| Eudicotyledons | Plantaginaceae | <i>Veronica</i>     | <i>Veronica macrantha</i>         | FJ848137 |
| Eudicotyledons | Plantaginaceae | <i>Veronica</i>     | <i>Veronica salicifolia</i>       | FJ848141 |
| Eudicotyledons | Plantaginaceae | <i>Veronica</i>     | <i>Veronica salicifolia</i>       | FJ848142 |
| Eudicotyledons | Ericaceae      | <i>Rhododendron</i> | <i>Rhododendron stamineum</i>     | JN046976 |
| Eudicotyledons | Ericaceae      | <i>Rhododendron</i> | <i>Rhododendron stamineum</i>     | JN046977 |
| Eudicotyledons | Ericaceae      | <i>Rhododendron</i> | <i>Rhododendron stamineum</i>     | HQ707025 |
| Eudicotyledons | Ericaceae      | <i>Rhododendron</i> | <i>Rhododendron stamineum</i>     | HQ707026 |
| Eudicotyledons | Ericaceae      | <i>Rhododendron</i> | <i>Rhododendron primuliflorum</i> | JN046929 |
| Eudicotyledons | Ericaceae      | <i>Rhododendron</i> | <i>Rhododendron primuliflorum</i> | JN046930 |
| Eudicotyledons | Ericaceae      | <i>Rhododendron</i> | <i>Rhododendron primuliflorum</i> | JN046931 |
| Eudicotyledons | Ericaceae      | <i>Rhododendron</i> | <i>Rhododendron farrerae</i>      | HQ706967 |
| Eudicotyledons | Ericaceae      | <i>Rhododendron</i> | <i>Rhododendron farrerae</i>      | HQ706968 |
| Eudicotyledons | Ericaceae      | <i>Rhododendron</i> | <i>Rhododendron indicum</i>       | HQ706982 |
| Eudicotyledons | Ericaceae      | <i>Rhododendron</i> | <i>Rhododendron indicum</i>       | HQ706983 |
| Eudicotyledons | Ericaceae      | <i>Rhododendron</i> | <i>Rhododendron indicum</i>       | HQ706984 |
| Eudicotyledons | Ericaceae      | <i>Rhododendron</i> | <i>Rhododendron indicum</i>       | HQ706985 |
| Eudicotyledons | Salicaceae     | <i>Salix</i>        | <i>Salix alba</i>                 | GU373307 |
| Eudicotyledons | Salicaceae     | <i>Salix</i>        | <i>Salix alba</i>                 | HQ596830 |
| Eudicotyledons | Salicaceae     | <i>Salix</i>        | <i>Salix babylonica</i>           | EU750538 |
| Eudicotyledons | Salicaceae     | <i>Salix</i>        | <i>Salix babylonica</i>           | EU750539 |
| Eudicotyledons | Salicaceae     | <i>Salix</i>        | <i>Salix bebbiana</i>             | GU562403 |
| Eudicotyledons | Salicaceae     | <i>Salix</i>        | <i>Salix bebbiana</i>             | HQ596831 |
| Eudicotyledons | Aceraceae      | <i>Acer</i>         | <i>Acer saccharinum</i>           | HQ266408 |
| Eudicotyledons | Aceraceae      | <i>Acer</i>         | <i>Acer saccharinum</i>           | HQ266409 |
| Eudicotyledons | Aceraceae      | <i>Acer</i>         | <i>Acer saccharinum</i>           | HQ266410 |
| Eudicotyledons | Aceraceae      | <i>Acer</i>         | <i>Acer saccharinum</i>           | HQ266411 |
| Eudicotyledons | Aceraceae      | <i>Acer</i>         | <i>Acer saccharinum</i>           | HQ266412 |
| Eudicotyledons | Aceraceae      | <i>Acer</i>         | <i>Acer saccharinum</i>           | HQ266413 |
| Eudicotyledons | Aceraceae      | <i>Acer</i>         | <i>Acer saccharinum</i>           | HQ266414 |
| Eudicotyledons | Aceraceae      | <i>Acer</i>         | <i>Acer saccharinum</i>           | HQ266415 |
| Eudicotyledons | Aceraceae      | <i>Acer</i>         | <i>Acer saccharinum</i>           | HQ266416 |
| Eudicotyledons | Aceraceae      | <i>Acer</i>         | <i>Acer saccharinum</i>           | HQ266417 |
| Eudicotyledons | Aceraceae      | <i>Acer</i>         | <i>Acer saccharinum</i>           | HQ266418 |





|                |               |                |                            |          |
|----------------|---------------|----------------|----------------------------|----------|
| Eudicotyledons | Aceraceae     | <i>Acer</i>    | <i>Acer saccharinum</i>    | HQ266472 |
| Eudicotyledons | Aceraceae     | <i>Acer</i>    | <i>Acer saccharinum</i>    | HQ266473 |
| Eudicotyledons | Aceraceae     | <i>Acer</i>    | <i>Acer saccharinum</i>    | HQ266474 |
| Eudicotyledons | Aceraceae     | <i>Acer</i>    | <i>Acer saccharinum</i>    | HQ266475 |
| Eudicotyledons | Aceraceae     | <i>Acer</i>    | <i>Acer saccharinum</i>    | HQ266476 |
| Eudicotyledons | Aceraceae     | <i>Acer</i>    | <i>Acer saccharinum</i>    | HQ266477 |
| Eudicotyledons | Aceraceae     | <i>Acer</i>    | <i>Acer saccharinum</i>    | HQ266478 |
| Eudicotyledons | Aceraceae     | <i>Acer</i>    | <i>Acer saccharinum</i>    | HQ266479 |
| Eudicotyledons | Aceraceae     | <i>Acer</i>    | <i>Acer saccharinum</i>    | HQ266480 |
| Eudicotyledons | Aceraceae     | <i>Acer</i>    | <i>Acer saccharinum</i>    | HQ266481 |
| Eudicotyledons | Aceraceae     | <i>Acer</i>    | <i>Acer saccharinum</i>    | HQ266482 |
| Eudicotyledons | Aceraceae     | <i>Acer</i>    | <i>Acer saccharinum</i>    | HQ266483 |
| Eudicotyledons | Aceraceae     | <i>Acer</i>    | <i>Acer saccharinum</i>    | HQ266484 |
| Eudicotyledons | Aceraceae     | <i>Acer</i>    | <i>Acer saccharinum</i>    | HQ266485 |
| Eudicotyledons | Aceraceae     | <i>Acer</i>    | <i>Acer saccharinum</i>    | HQ266486 |
| Eudicotyledons | Aceraceae     | <i>Acer</i>    | <i>Acer saccharinum</i>    | HQ266487 |
| Eudicotyledons | Aceraceae     | <i>Acer</i>    | <i>Acer saccharinum</i>    | HQ266488 |
| Eudicotyledons | Aceraceae     | <i>Acer</i>    | <i>Acer saccharinum</i>    | HQ266489 |
| Eudicotyledons | Aceraceae     | <i>Acer</i>    | <i>Acer saccharinum</i>    | HQ266490 |
| Eudicotyledons | Aceraceae     | <i>Acer</i>    | <i>Acer saccharinum</i>    | EU750434 |
| Eudicotyledons | Aceraceae     | <i>Acer</i>    | <i>Acer saccharinum</i>    | EU750435 |
| Eudicotyledons | Aceraceae     | <i>Acer</i>    | <i>Acer saccharinum</i>    | EU750436 |
| Eudicotyledons | Aceraceae     | <i>Acer</i>    | <i>Acer saccharinum</i>    | EU750437 |
| Eudicotyledons | Asteraceae    | <i>Lactuca</i> | <i>Lactuca serriola</i>    | HQ596742 |
| Eudicotyledons | Asteraceae    | <i>Lactuca</i> | <i>Lactuca serriola</i>    | GU109332 |
| Eudicotyledons | Asteraceae    | <i>Lactuca</i> | <i>Lactuca serriola</i>    | EU750469 |
| Eudicotyledons | Asteraceae    | <i>Lactuca</i> | <i>Lactuca serriola</i>    | EU750470 |
| Eudicotyledons | Asteraceae    | <i>Lactuca</i> | <i>Lactuca indica</i>      | GU109317 |
| Eudicotyledons | Asteraceae    | <i>Lactuca</i> | <i>Lactuca indica</i>      | GU109320 |
| Eudicotyledons | Campanulaceae | <i>Lobelia</i> | <i>Lobelia cardinalis</i>  | DQ272722 |
| Eudicotyledons | Campanulaceae | <i>Lobelia</i> | <i>Lobelia cardinalis</i>  | GQ248331 |
| Eudicotyledons | Campanulaceae | <i>Lobelia</i> | <i>Lobelia cardinalis</i>  | EF590709 |
| Eudicotyledons | Salicaceae    | <i>Salix</i>   | <i>Salix exigua</i>        | EU750544 |
| Eudicotyledons | Salicaceae    | <i>Salix</i>   | <i>Salix exigua</i>        | EU750545 |
| Eudicotyledons | Salicaceae    | <i>Salix</i>   | <i>Salix herbacea</i>      | GU373280 |
| Eudicotyledons | Salicaceae    | <i>Salix</i>   | <i>Salix herbacea</i>      | GU373281 |
| Eudicotyledons | Burseraceae   | <i>Bursera</i> | <i>Bursera attenuata</i>   | GQ377871 |
| Eudicotyledons | Burseraceae   | <i>Bursera</i> | <i>Bursera attenuata</i>   | GQ377872 |
| Eudicotyledons | Burseraceae   | <i>Bursera</i> | <i>Bursera attenuata</i>   | GQ377873 |
| Eudicotyledons | Burseraceae   | <i>Bursera</i> | <i>Bursera grandifolia</i> | GQ377876 |
| Eudicotyledons | Burseraceae   | <i>Bursera</i> | <i>Bursera grandifolia</i> | GQ377877 |
| Eudicotyledons | Burseraceae   | <i>Bursera</i> | <i>Bursera grandifolia</i> | GQ377878 |
| Eudicotyledons | Burseraceae   | <i>Bursera</i> | <i>Bursera grandifolia</i> | GQ377879 |
| Eudicotyledons | Burseraceae   | <i>Bursera</i> | <i>Bursera instabilis</i>  | GQ377882 |
| Eudicotyledons | Burseraceae   | <i>Bursera</i> | <i>Bursera instabilis</i>  | GQ377883 |
| Eudicotyledons | Burseraceae   | <i>Bursera</i> | <i>Bursera instabilis</i>  | GQ377884 |
| Eudicotyledons | Burseraceae   | <i>Bursera</i> | <i>Bursera instabilis</i>  | GQ377885 |
| Eudicotyledons | Burseraceae   | <i>Bursera</i> | <i>Bursera longipes</i>    | GQ377890 |
| Eudicotyledons | Burseraceae   | <i>Bursera</i> | <i>Bursera longipes</i>    | GQ377891 |
| Eudicotyledons | Burseraceae   | <i>Bursera</i> | <i>Bursera longipes</i>    | GQ377892 |
| Eudicotyledons | Burseraceae   | <i>Bursera</i> | <i>Bursera longipes</i>    | GQ377893 |
| Eudicotyledons | Burseraceae   | <i>Bursera</i> | <i>Bursera longipes</i>    | AY309395 |
| Eudicotyledons | Burseraceae   | <i>Bursera</i> | <i>Bursera simaruba</i>    | GQ377897 |













|                |               |                    |                              |          |
|----------------|---------------|--------------------|------------------------------|----------|
| Eudicotyledons | Araliaceae    | <i>Hydrocotyle</i> | <i>Hydrocotyle vulgaris</i>  | FM207079 |
| Eudicotyledons | Araliaceae    | <i>Hydrocotyle</i> | <i>Hydrocotyle vulgaris</i>  | FM207080 |
| Eudicotyledons | Araliaceae    | <i>Hydrocotyle</i> | <i>Hydrocotyle vulgaris</i>  | FM207081 |
| Eudicotyledons | Araliaceae    | <i>Hydrocotyle</i> | <i>Hydrocotyle vulgaris</i>  | FM207082 |
| Eudicotyledons | Araliaceae    | <i>Hydrocotyle</i> | <i>Hydrocotyle vulgaris</i>  | FM207083 |
| Eudicotyledons | Araliaceae    | <i>Hydrocotyle</i> | <i>Hydrocotyle vulgaris</i>  | FM207084 |
| Eudicotyledons | Adoxaceae     | <i>Viburnum</i>    | <i>Viburnum opulus</i>       | GU562393 |
| Eudicotyledons | Adoxaceae     | <i>Viburnum</i>    | <i>Viburnum opulus</i>       | EU750611 |
| Eudicotyledons | Adoxaceae     | <i>Viburnum</i>    | <i>Viburnum opulus</i>       | EU750612 |
| Eudicotyledons | Araliaceae    | <i>Hedera</i>      | <i>Hedera algeriensis</i>    | AY163508 |
| Eudicotyledons | Araliaceae    | <i>Hedera</i>      | <i>Hedera algeriensis</i>    | GU054838 |
| Eudicotyledons | Araliaceae    | <i>Hedera</i>      | <i>Hedera hibernica</i>      | AY163520 |
| Eudicotyledons | Araliaceae    | <i>Hedera</i>      | <i>Hedera hibernica</i>      | AY163521 |
| Eudicotyledons | Araliaceae    | <i>Hedera</i>      | <i>Hedera hibernica</i>      | FN675789 |
| Eudicotyledons | Araliaceae    | <i>Hedera</i>      | <i>Hedera pastuchovii</i>    | AY163509 |
| Eudicotyledons | Araliaceae    | <i>Hedera</i>      | <i>Hedera pastuchovii</i>    | GU054799 |
| Eudicotyledons | Araliaceae    | <i>Hedera</i>      | <i>Hedera rhombea</i>        | AY163510 |
| Eudicotyledons | Araliaceae    | <i>Hedera</i>      | <i>Hedera rhombea</i>        | GU054798 |
| Eudicotyledons | Loasaceae     | <i>Mentzelia</i>   | <i>Mentzelia lindleyi</i>    | FJ918163 |
| Eudicotyledons | Loasaceae     | <i>Mentzelia</i>   | <i>Mentzelia lindleyi</i>    | FJ918164 |
| Eudicotyledons | Loasaceae     | <i>Mentzelia</i>   | <i>Mentzelia lindleyi</i>    | FJ918165 |
| Eudicotyledons | Loasaceae     | <i>Mentzelia</i>   | <i>Mentzelia lindleyi</i>    | JF321278 |
| Eudicotyledons | Apiaceae      | <i>Eryngium</i>    | <i>Eryngium alpinum</i>      | GQ385229 |
| Eudicotyledons | Apiaceae      | <i>Eryngium</i>    | <i>Eryngium alpinum</i>      | GQ385230 |
| Eudicotyledons | Apiaceae      | <i>Eryngium</i>    | <i>Eryngium alpinum</i>      | GQ385231 |
| Eudicotyledons | Apiaceae      | <i>Eryngium</i>    | <i>Eryngium alpinum</i>      | GQ385232 |
| Eudicotyledons | Apiaceae      | <i>Eryngium</i>    | <i>Eryngium alpinum</i>      | GQ385233 |
| Eudicotyledons | Apiaceae      | <i>Eryngium</i>    | <i>Eryngium alpinum</i>      | GQ385234 |
| Eudicotyledons | Apiaceae      | <i>Eryngium</i>    | <i>Eryngium alpinum</i>      | GQ385235 |
| Eudicotyledons | Apiaceae      | <i>Eryngium</i>    | <i>Eryngium alpinum</i>      | GQ385236 |
| Eudicotyledons | Apiaceae      | <i>Eryngium</i>    | <i>Eryngium alpinum</i>      | GQ385237 |
| Eudicotyledons | Apiaceae      | <i>Eryngium</i>    | <i>Eryngium alpinum</i>      | GQ385238 |
| Eudicotyledons | Apiaceae      | <i>Eryngium</i>    | <i>Eryngium alpinum</i>      | GQ385239 |
| Eudicotyledons | Asteraceae    | <i>Erigeron</i>    | <i>Erigeron annuus</i>       | GU724265 |
| Eudicotyledons | Asteraceae    | <i>Erigeron</i>    | <i>Erigeron annuus</i>       | HQ596688 |
| Eudicotyledons | Asteraceae    | <i>Erigeron</i>    | <i>Erigeron annuus</i>       | EU337691 |
| Eudicotyledons | Asteraceae    | <i>Erigeron</i>    | <i>Erigeron annuus</i>       | EU337692 |
| Eudicotyledons | Asteraceae    | <i>Erigeron</i>    | <i>Erigeron annuus</i>       | EU337693 |
| Eudicotyledons | Asteraceae    | <i>Erigeron</i>    | <i>Erigeron annuus</i>       | EU750456 |
| Eudicotyledons | Asteraceae    | <i>Erigeron</i>    | <i>Erigeron annuus</i>       | EU750457 |
| Eudicotyledons | Asteraceae    | <i>Erigeron</i>    | <i>Erigeron annuus</i>       | EU750458 |
| Eudicotyledons | Asteraceae    | <i>Erigeron</i>    | <i>Erigeron strigosus</i>    | HQ596691 |
| Eudicotyledons | Asteraceae    | <i>Erigeron</i>    | <i>Erigeron strigosus</i>    | EU750459 |
| Eudicotyledons | Asteraceae    | <i>Erigeron</i>    | <i>Erigeron strigosus</i>    | EU750460 |
| Eudicotyledons | Asteraceae    | <i>Erigeron</i>    | <i>Erigeron strigosus</i>    | EU750461 |
| Eudicotyledons | Asteraceae    | <i>Erigeron</i>    | <i>Erigeron strigosus</i>    | EU750462 |
| Eudicotyledons | Asteraceae    | <i>Cirsium</i>     | <i>Cirsium vulgare</i>       | HQ596646 |
| Eudicotyledons | Asteraceae    | <i>Cirsium</i>     | <i>Cirsium vulgare</i>       | HQ596647 |
| Eudicotyledons | Ranunculaceae | <i>Eranthis</i>    | <i>Eranthis byunsanensis</i> | JF505810 |
| Eudicotyledons | Ranunculaceae | <i>Eranthis</i>    | <i>Eranthis byunsanensis</i> | JF505811 |
| Eudicotyledons | Ranunculaceae | <i>Eranthis</i>    | <i>Eranthis byunsanensis</i> | JF505812 |
| Eudicotyledons | Ranunculaceae | <i>Eranthis</i>    | <i>Eranthis byunsanensis</i> | JF505813 |
| Eudicotyledons | Ranunculaceae | <i>Eranthis</i>    | <i>Eranthis byunsanensis</i> | JF505814 |



|                |               |                  |                                 |          |
|----------------|---------------|------------------|---------------------------------|----------|
| Eudicotyledons | Ranunculaceae | <i>Eranthis</i>  | <i>Eranthis byunsanensis</i>    | JF505815 |
| Eudicotyledons | Ranunculaceae | <i>Eranthis</i>  | <i>Eranthis byunsanensis</i>    | JF505816 |
| Eudicotyledons | Ranunculaceae | <i>Eranthis</i>  | <i>Eranthis byunsanensis</i>    | JF505817 |
| Eudicotyledons | Ranunculaceae | <i>Eranthis</i>  | <i>Eranthis byunsanensis</i>    | JF505818 |
| Eudicotyledons | Ranunculaceae | <i>Eranthis</i>  | <i>Eranthis byunsanensis</i>    | JF505819 |
| Eudicotyledons | Ranunculaceae | <i>Eranthis</i>  | <i>Eranthis byunsanensis</i>    | JF505820 |
| Eudicotyledons | Ranunculaceae | <i>Eranthis</i>  | <i>Eranthis byunsanensis</i>    | JF505821 |
| Eudicotyledons | Ranunculaceae | <i>Eranthis</i>  | <i>Eranthis byunsanensis</i>    | JF505822 |
| Eudicotyledons | Ranunculaceae | <i>Eranthis</i>  | <i>Eranthis byunsanensis</i>    | JF505823 |
| Eudicotyledons | Ranunculaceae | <i>Eranthis</i>  | <i>Eranthis byunsanensis</i>    | JF505824 |
| Eudicotyledons | Ranunculaceae | <i>Eranthis</i>  | <i>Eranthis byunsanensis</i>    | JF505825 |
| Eudicotyledons | Ranunculaceae | <i>Eranthis</i>  | <i>Eranthis byunsanensis</i>    | JF505826 |
| Eudicotyledons | Ranunculaceae | <i>Eranthis</i>  | <i>Eranthis byunsanensis</i>    | JF505827 |
| Eudicotyledons | Ranunculaceae | <i>Eranthis</i>  | <i>Eranthis byunsanensis</i>    | JF505828 |
| Eudicotyledons | Ranunculaceae | <i>Eranthis</i>  | <i>Eranthis byunsanensis</i>    | JF505829 |
| Eudicotyledons | Ranunculaceae | <i>Eranthis</i>  | <i>Eranthis byunsanensis</i>    | JF505830 |
| Eudicotyledons | Ranunculaceae | <i>Eranthis</i>  | <i>Eranthis byunsanensis</i>    | JF505831 |
| Eudicotyledons | Ranunculaceae | <i>Eranthis</i>  | <i>Eranthis byunsanensis</i>    | JF505832 |
| Eudicotyledons | Ranunculaceae | <i>Eranthis</i>  | <i>Eranthis byunsanensis</i>    | JF505833 |
| Eudicotyledons | Ranunculaceae | <i>Eranthis</i>  | <i>Eranthis byunsanensis</i>    | JF505834 |
| Eudicotyledons | Ranunculaceae | <i>Eranthis</i>  | <i>Eranthis stellata</i>        | JF505808 |
| Eudicotyledons | Ranunculaceae | <i>Eranthis</i>  | <i>Eranthis stellata</i>        | JF505809 |
| Eudicotyledons | Vitaceae      | <i>Vitis</i>     | <i>Vitis riparia</i>            | HQ596898 |
| Eudicotyledons | Vitaceae      | <i>Vitis</i>     | <i>Vitis riparia</i>            | HQ596899 |
| Eudicotyledons | Vitaceae      | <i>Vitis</i>     | <i>Vitis riparia</i>            | HQ108294 |
| Eudicotyledons | Vitaceae      | <i>Vitis</i>     | <i>Vitis riparia</i>            | HQ108295 |
| Eudicotyledons | Vitaceae      | <i>Vitis</i>     | <i>Vitis riparia</i>            | HQ108296 |
| Eudicotyledons | Vitaceae      | <i>Vitis</i>     | <i>Vitis riparia</i>            | HQ108298 |
| Eudicotyledons | Vitaceae      | <i>Vitis</i>     | <i>Vitis riparia</i>            | HQ108299 |
| Eudicotyledons | Vitaceae      | <i>Vitis</i>     | <i>Vitis riparia</i>            | HQ108300 |
| Eudicotyledons | Vitaceae      | <i>Vitis</i>     | <i>Vitis riparia</i>            | HQ108301 |
| Eudicotyledons | Vitaceae      | <i>Vitis</i>     | <i>Vitis riparia</i>            | HQ108302 |
| Eudicotyledons | Vitaceae      | <i>Vitis</i>     | <i>Vitis riparia</i>            | HQ656407 |
| Eudicotyledons | Vitaceae      | <i>Vitis</i>     | <i>Vitis riparia</i>            | HQ656409 |
| Eudicotyledons | Vitaceae      | <i>Vitis</i>     | <i>Vitis riparia</i>            | HQ656491 |
| Eudicotyledons | Vitaceae      | <i>Vitis</i>     | <i>Vitis riparia</i>            | JF437165 |
| Eudicotyledons | Asteraceae    | <i>Jacobaea</i>  | <i>Jacobaea vulgaris</i>        | FJ395449 |
| Eudicotyledons | Asteraceae    | <i>Jacobaea</i>  | <i>Jacobaea vulgaris</i>        | AY155657 |
| Eudicotyledons | Asteraceae    | <i>Santolina</i> | <i>Santolina rosmarinifolia</i> | JF345737 |
| Eudicotyledons | Asteraceae    | <i>Santolina</i> | <i>Santolina rosmarinifolia</i> | JF345751 |
| Eudicotyledons | Asteraceae    | <i>Santolina</i> | <i>Santolina rosmarinifolia</i> | JF345752 |
| Eudicotyledons | Asteraceae    | <i>Santolina</i> | <i>Santolina rosmarinifolia</i> | JF345753 |
| Eudicotyledons | Asteraceae    | <i>Santolina</i> | <i>Santolina rosmarinifolia</i> | JF345759 |
| Eudicotyledons | Asteraceae    | <i>Santolina</i> | <i>Santolina rosmarinifolia</i> | JF345760 |
| Eudicotyledons | Asteraceae    | <i>Santolina</i> | <i>Santolina rosmarinifolia</i> | JF345770 |
| Eudicotyledons | Asteraceae    | <i>Santolina</i> | <i>Santolina rosmarinifolia</i> | JF345771 |
| Eudicotyledons | Aceraceae     | <i>Acer</i>      | <i>Acer fabri</i>               | EF186780 |
| Eudicotyledons | Aceraceae     | <i>Acer</i>      | <i>Acer fabri</i>               | JN043722 |
| Eudicotyledons | Aceraceae     | <i>Acer</i>      | <i>Acer fabri</i>               | JN043723 |
| Eudicotyledons | Aceraceae     | <i>Acer</i>      | <i>Acer fabri</i>               | JN043724 |
| Eudicotyledons | Aceraceae     | <i>Acer</i>      | <i>Acer fabri</i>               | JN043725 |
| Eudicotyledons | Aceraceae     | <i>Acer</i>      | <i>Acer fabri</i>               | HM352719 |
| Eudicotyledons | Apiaceae      | <i>Heracleum</i> | <i>Heracleum moellendorffii</i> | GU967830 |



|                |                |                    |                                     |          |
|----------------|----------------|--------------------|-------------------------------------|----------|
| Eudicotyledons | Saxifragaceae  | <i>Mitella</i>     | <i>Mitella pauciflora</i>           | AB492608 |
| Eudicotyledons | Saxifragaceae  | <i>Mitella</i>     | <i>Mitella pauciflora</i>           | AB492609 |
| Eudicotyledons | Saxifragaceae  | <i>Mitella</i>     | <i>Mitella pauciflora</i>           | AB492610 |
| Eudicotyledons | Saxifragaceae  | <i>Mitella</i>     | <i>Mitella pauciflora</i>           | AB492611 |
| Eudicotyledons | Saxifragaceae  | <i>Mitella</i>     | <i>Mitella yoshinagae</i>           | AB492535 |
| Eudicotyledons | Saxifragaceae  | <i>Mitella</i>     | <i>Mitella yoshinagae</i>           | AB492536 |
| Eudicotyledons | Saxifragaceae  | <i>Mitella</i>     | <i>Mitella yoshinagae</i>           | AB492537 |
| Eudicotyledons | Saxifragaceae  | <i>Mitella</i>     | <i>Mitella yoshinagae</i>           | AB492538 |
| Eudicotyledons | Saxifragaceae  | <i>Mitella</i>     | <i>Mitella yoshinagae</i>           | AB492539 |
| Eudicotyledons | Saxifragaceae  | <i>Mitella</i>     | <i>Mitella yoshinagae</i>           | AB492540 |
| Eudicotyledons | Saxifragaceae  | <i>Mitella</i>     | <i>Mitella yoshinagae</i>           | AB492541 |
| Eudicotyledons | Saxifragaceae  | <i>Mitella</i>     | <i>Mitella yoshinagae</i>           | AB492542 |
| Eudicotyledons | Saxifragaceae  | <i>Mitella</i>     | <i>Mitella yoshinagae</i>           | AB492543 |
| Eudicotyledons | Saxifragaceae  | <i>Mitella</i>     | <i>Mitella yoshinagae</i>           | AB492544 |
| Eudicotyledons | Saxifragaceae  | <i>Mitella</i>     | <i>Mitella yoshinagae</i>           | AB492545 |
| Eudicotyledons | Saxifragaceae  | <i>Mitella</i>     | <i>Mitella yoshinagae</i>           | AB492546 |
| Eudicotyledons | Saxifragaceae  | <i>Mitella</i>     | <i>Mitella yoshinagae</i>           | AB492547 |
| Eudicotyledons | Saxifragaceae  | <i>Mitella</i>     | <i>Mitella yoshinagae</i>           | AB492548 |
| Eudicotyledons | Rosaceae       | <i>Fragaria</i>    | <i>Fragaria orientalis</i>          | GQ476767 |
| Eudicotyledons | Rosaceae       | <i>Fragaria</i>    | <i>Fragaria orientalis</i>          | GQ476768 |
| Eudicotyledons | Rosaceae       | <i>Fragaria</i>    | <i>Fragaria orientalis</i>          | GQ476769 |
| Eudicotyledons | Aquifoliaceae  | <i>Ilex</i>        | <i>Ilex opaca</i>                   | EU359322 |
| Eudicotyledons | Aquifoliaceae  | <i>Ilex</i>        | <i>Ilex opaca</i>                   | EF590704 |
| Eudicotyledons | Rosaceae       | <i>Prunus</i>      | <i>Prunus mume</i>                  | AY500621 |
| Eudicotyledons | Rosaceae       | <i>Prunus</i>      | <i>Prunus mume</i>                  | JN046609 |
| Eudicotyledons | Rosaceae       | <i>Prunus</i>      | <i>Prunus mume</i>                  | JN046647 |
| Eudicotyledons | Rosaceae       | <i>Prunus</i>      | <i>Prunus mume</i>                  | JN046648 |
| Eudicotyledons | Rosaceae       | <i>Prunus</i>      | <i>Prunus mume</i>                  | JN046649 |
| Eudicotyledons | Rosaceae       | <i>Prunus</i>      | <i>Prunus mume</i>                  | JN046650 |
| Eudicotyledons | Rosaceae       | <i>Prunus</i>      | <i>Prunus mume</i>                  | JN046651 |
| Eudicotyledons | Plantaginaceae | <i>Antirrhinum</i> | <i>Antirrhinum braun-blانquetii</i> | HM152884 |
| Eudicotyledons | Plantaginaceae | <i>Antirrhinum</i> | <i>Antirrhinum braun-blانquetii</i> | HM152885 |
| Eudicotyledons | Plantaginaceae | <i>Antirrhinum</i> | <i>Antirrhinum graniticum</i>       | HM152899 |
| Eudicotyledons | Plantaginaceae | <i>Antirrhinum</i> | <i>Antirrhinum graniticum</i>       | HM152900 |
| Eudicotyledons | Plantaginaceae | <i>Antirrhinum</i> | <i>Antirrhinum graniticum</i>       | HM152901 |
| Eudicotyledons | Plantaginaceae | <i>Antirrhinum</i> | <i>Antirrhinum molle</i>            | HM152931 |
| Eudicotyledons | Plantaginaceae | <i>Antirrhinum</i> | <i>Antirrhinum molle</i>            | HM152932 |
| Eudicotyledons | Plantaginaceae | <i>Antirrhinum</i> | <i>Antirrhinum siculum</i>          | HM152948 |
| Eudicotyledons | Plantaginaceae | <i>Antirrhinum</i> | <i>Antirrhinum siculum</i>          | HM152949 |
| Eudicotyledons | Plantaginaceae | <i>Antirrhinum</i> | <i>Antirrhinum valentinum</i>       | HM152961 |
| Eudicotyledons | Plantaginaceae | <i>Antirrhinum</i> | <i>Antirrhinum valentinum</i>       | HM152962 |
| Eudicotyledons | Plantaginaceae | <i>Antirrhinum</i> | <i>Antirrhinum valentinum</i>       | HM152963 |
| Eudicotyledons | Plantaginaceae | <i>Antirrhinum</i> | <i>Antirrhinum valentinum</i>       | HM152964 |
| Eudicotyledons | Plantaginaceae | <i>Antirrhinum</i> | <i>Antirrhinum valentinum</i>       | HM152965 |
| Eudicotyledons | Oleaceae       | <i>Fraxinus</i>    | <i>Fraxinus texensis</i>            | HM367558 |
| Eudicotyledons | Oleaceae       | <i>Fraxinus</i>    | <i>Fraxinus texensis</i>            | HM367559 |
| Eudicotyledons | Vitaceae       | <i>Vitis</i>       | <i>Vitis rotundifolia</i>           | HM585791 |
| Eudicotyledons | Vitaceae       | <i>Vitis</i>       | <i>Vitis rotundifolia</i>           | HQ108337 |
| Eudicotyledons | Vitaceae       | <i>Vitis</i>       | <i>Vitis rotundifolia</i>           | HQ656476 |
| Eudicotyledons | Vitaceae       | <i>Vitis</i>       | <i>Vitis rotundifolia</i>           | HQ656477 |
| Eudicotyledons | Vitaceae       | <i>Vitis</i>       | <i>Vitis rotundifolia</i>           | HQ656478 |
| Eudicotyledons | Vitaceae       | <i>Vitis</i>       | <i>Vitis rotundifolia</i>           | JF437166 |
| Eudicotyledons | Vitaceae       | <i>Vitis</i>       | <i>Vitis amurensis</i>              | HQ108309 |

|                |              |                     |                              |          |
|----------------|--------------|---------------------|------------------------------|----------|
| Eudicotyledons | Vitaceae     | <i>Vitis</i>        | <i>Vitis amurensis</i>       | HQ656454 |
| Eudicotyledons | Vitaceae     | <i>Vitis</i>        | <i>Vitis amurensis</i>       | HQ656455 |
| Eudicotyledons | Vitaceae     | <i>Vitis</i>        | <i>Vitis amurensis</i>       | HQ656456 |
| Eudicotyledons | Vitaceae     | <i>Vitis</i>        | <i>Vitis rupestris</i>       | HQ108303 |
| Eudicotyledons | Vitaceae     | <i>Vitis</i>        | <i>Vitis rupestris</i>       | HQ108304 |
| Eudicotyledons | Vitaceae     | <i>Vitis</i>        | <i>Vitis rupestris</i>       | HQ108305 |
| Eudicotyledons | Vitaceae     | <i>Vitis</i>        | <i>Vitis rupestris</i>       | HQ108306 |
| Eudicotyledons | Vitaceae     | <i>Vitis</i>        | <i>Vitis rupestris</i>       | HQ108307 |
| Eudicotyledons | Vitaceae     | <i>Vitis</i>        | <i>Vitis rupestris</i>       | HQ108308 |
| Eudicotyledons | Vitaceae     | <i>Vitis</i>        | <i>Vitis rupestris</i>       | HQ656417 |
| Eudicotyledons | Vitaceae     | <i>Vitis</i>        | <i>Vitis arizonica</i>       | HQ108269 |
| Eudicotyledons | Vitaceae     | <i>Vitis</i>        | <i>Vitis arizonica</i>       | HQ656408 |
| Eudicotyledons | Vitaceae     | <i>Vitis</i>        | <i>Vitis arizonica</i>       | HQ656480 |
| Eudicotyledons | Vitaceae     | <i>Vitis</i>        | <i>Vitis davidii</i>         | JN802331 |
| Eudicotyledons | Vitaceae     | <i>Vitis</i>        | <i>Vitis davidii</i>         | HQ108316 |
| Eudicotyledons | Vitaceae     | <i>Vitis</i>        | <i>Vitis davidii</i>         | HQ108317 |
| Eudicotyledons | Vitaceae     | <i>Vitis</i>        | <i>Vitis davidii</i>         | HQ656440 |
| Eudicotyledons | Vitaceae     | <i>Vitis</i>        | <i>Vitis davidii</i>         | HQ656441 |
| Eudicotyledons | Vitaceae     | <i>Vitis</i>        | <i>Vitis davidii</i>         | HQ656450 |
| Eudicotyledons | Vitaceae     | <i>Vitis</i>        | <i>Vitis labrusca</i>        | HQ108293 |
| Eudicotyledons | Vitaceae     | <i>Vitis</i>        | <i>Vitis labrusca</i>        | HQ108297 |
| Eudicotyledons | Vitaceae     | <i>Vitis</i>        | <i>Vitis labrusca</i>        | HQ656421 |
| Eudicotyledons | Vitaceae     | <i>Vitis</i>        | <i>Vitis labrusca</i>        | HQ656481 |
| Eudicotyledons | Rosaceae     | <i>Chaenomeles</i>  | <i>Chaenomeles speciosa</i>  | JQ390646 |
| Eudicotyledons | Rosaceae     | <i>Chaenomeles</i>  | <i>Chaenomeles speciosa</i>  | JQ390649 |
| Eudicotyledons | Rosaceae     | <i>Chaenomeles</i>  | <i>Chaenomeles speciosa</i>  | JQ390650 |
| Eudicotyledons | Rosaceae     | <i>Chaenomeles</i>  | <i>Chaenomeles speciosa</i>  | JQ390651 |
| Eudicotyledons | Rosaceae     | <i>Chaenomeles</i>  | <i>Chaenomeles speciosa</i>  | JQ390653 |
| Eudicotyledons | Rosaceae     | <i>Malus</i>        | <i>Malus angustifolia</i>    | EF127153 |
| Eudicotyledons | Rosaceae     | <i>Malus</i>        | <i>Malus angustifolia</i>    | JQ390733 |
| Eudicotyledons | Rosaceae     | <i>Malus</i>        | <i>Malus sargentii</i>       | JQ390722 |
| Eudicotyledons | Rosaceae     | <i>Malus</i>        | <i>Malus sargentii</i>       | JQ390723 |
| Eudicotyledons | Solanaceae   | <i>Capsicum</i>     | <i>Capsicum chacoense</i>    | EF537208 |
| Eudicotyledons | Solanaceae   | <i>Capsicum</i>     | <i>Capsicum chacoense</i>    | EF537209 |
| Eudicotyledons | Solanaceae   | <i>Capsicum</i>     | <i>Capsicum chacoense</i>    | EF537210 |
| Eudicotyledons | Brassicaceae | <i>Raphanus</i>     | <i>Raphanus raphanistrum</i> | GQ248383 |
| Eudicotyledons | Brassicaceae | <i>Raphanus</i>     | <i>Raphanus raphanistrum</i> | EF590736 |
| Eudicotyledons | Solanaceae   | <i>Capsicum</i>     | <i>Capsicum pubescens</i>    | EF537221 |
| Eudicotyledons | Solanaceae   | <i>Capsicum</i>     | <i>Capsicum pubescens</i>    | EF537222 |
| Eudicotyledons | Solanaceae   | <i>Capsicum</i>     | <i>Capsicum pubescens</i>    | EF537223 |
| Eudicotyledons | Rosaceae     | <i>Prunus</i>       | <i>Prunus spinosa</i>        | FJ395549 |
| Eudicotyledons | Rosaceae     | <i>Prunus</i>       | <i>Prunus spinosa</i>        | FR865110 |
| Eudicotyledons | Rosaceae     | <i>Prunus</i>       | <i>Prunus spinosa</i>        | AY500615 |
| Eudicotyledons | Rosaceae     | <i>Rosa</i>         | <i>Rosa acicularis</i>       | DQ778741 |
| Eudicotyledons | Rosaceae     | <i>Rosa</i>         | <i>Rosa acicularis</i>       | DQ778742 |
| Eudicotyledons | Rosaceae     | <i>Rosa</i>         | <i>Rosa acicularis</i>       | DQ778743 |
| Eudicotyledons | Ericaceae    | <i>Rhododendron</i> | <i>Rhododendron mariesii</i> | HQ426992 |
| Eudicotyledons | Ericaceae    | <i>Rhododendron</i> | <i>Rhododendron mariesii</i> | JN046878 |
| Eudicotyledons | Ericaceae    | <i>Rhododendron</i> | <i>Rhododendron mariesii</i> | JN046879 |
| Eudicotyledons | Ericaceae    | <i>Rhododendron</i> | <i>Rhododendron mariesii</i> | HQ706995 |
| Eudicotyledons | Ericaceae    | <i>Rhododendron</i> | <i>Rhododendron simsii</i>   | HQ415427 |
| Eudicotyledons | Ericaceae    | <i>Rhododendron</i> | <i>Rhododendron simsii</i>   | HQ426991 |
| Eudicotyledons | Ericaceae    | <i>Rhododendron</i> | <i>Rhododendron simsii</i>   | JN046961 |

|                |                |                     |                                |          |
|----------------|----------------|---------------------|--------------------------------|----------|
| Eudicotyledons | Ericaceae      | <i>Rhododendron</i> | <i>Rhododendron simsii</i>     | JN046962 |
| Eudicotyledons | Ericaceae      | <i>Rhododendron</i> | <i>Rhododendron simsii</i>     | JN046963 |
| Eudicotyledons | Ericaceae      | <i>Rhododendron</i> | <i>Rhododendron simsii</i>     | HQ707022 |
| Eudicotyledons | Ericaceae      | <i>Rhododendron</i> | <i>Rhododendron oldhamii</i>   | HQ707008 |
| Eudicotyledons | Ericaceae      | <i>Rhododendron</i> | <i>Rhododendron oldhamii</i>   | HQ707009 |
| Eudicotyledons | Ericaceae      | <i>Rhododendron</i> | <i>Rhododendron micranthum</i> | HQ706998 |
| Eudicotyledons | Ericaceae      | <i>Rhododendron</i> | <i>Rhododendron micranthum</i> | HQ706999 |
| Eudicotyledons | Asteraceae     | <i>Inula</i>        | <i>Inula britannica</i>        | GU724259 |
| Eudicotyledons | Asteraceae     | <i>Inula</i>        | <i>Inula britannica</i>        | GQ435106 |
| Eudicotyledons | Asteraceae     | <i>Inula</i>        | <i>Inula britannica</i>        | GQ435107 |
| Eudicotyledons | Asteraceae     | <i>Inula</i>        | <i>Inula britannica</i>        | AY215561 |
| Eudicotyledons | Solanaceae     | <i>Solanum</i>      | <i>Solanum torvum</i>          | JN407061 |
| Eudicotyledons | Solanaceae     | <i>Solanum</i>      | <i>Solanum torvum</i>          | JN407062 |
| Eudicotyledons | Solanaceae     | <i>Solanum</i>      | <i>Solanum torvum</i>          | JN407063 |
| Eudicotyledons | Solanaceae     | <i>Solanum</i>      | <i>Solanum torvum</i>          | JN407064 |
| Eudicotyledons | Solanaceae     | <i>Solanum</i>      | <i>Solanum torvum</i>          | GU135422 |
| Eudicotyledons | Solanaceae     | <i>Solanum</i>      | <i>Solanum torvum</i>          | JN047230 |
| Eudicotyledons | Solanaceae     | <i>Solanum</i>      | <i>Solanum torvum</i>          | JN047231 |
| Eudicotyledons | Asteraceae     | <i>Centaurea</i>    | <i>Centaurea corymbosa</i>     | DQ846180 |
| Eudicotyledons | Asteraceae     | <i>Centaurea</i>    | <i>Centaurea corymbosa</i>     | DQ846181 |
| Eudicotyledons | Asteraceae     | <i>Centaurea</i>    | <i>Centaurea corymbosa</i>     | DQ846182 |
| Eudicotyledons | Asteraceae     | <i>Centaurea</i>    | <i>Centaurea corymbosa</i>     | DQ846195 |
| Eudicotyledons | Asteraceae     | <i>Centaurea</i>    | <i>Centaurea corymbosa</i>     | DQ846196 |
| Eudicotyledons | Asteraceae     | <i>Centaurea</i>    | <i>Centaurea corymbosa</i>     | DQ846197 |
| Eudicotyledons | Asteraceae     | <i>Centaurea</i>    | <i>Centaurea corymbosa</i>     | DQ846198 |
| Eudicotyledons | Asteraceae     | <i>Centaurea</i>    | <i>Centaurea corymbosa</i>     | DQ846199 |
| Eudicotyledons | Asteraceae     | <i>Centaurea</i>    | <i>Centaurea corymbosa</i>     | DQ846200 |
| Eudicotyledons | Asteraceae     | <i>Centaurea</i>    | <i>Centaurea corymbosa</i>     | DQ846201 |
| Eudicotyledons | Asteraceae     | <i>Centaurea</i>    | <i>Centaurea corymbosa</i>     | DQ846202 |
| Eudicotyledons | Asteraceae     | <i>Centaurea</i>    | <i>Centaurea corymbosa</i>     | DQ846203 |
| Eudicotyledons | Asteraceae     | <i>Centaurea</i>    | <i>Centaurea corymbosa</i>     | DQ846231 |
| Eudicotyledons | Asteraceae     | <i>Centaurea</i>    | <i>Centaurea corymbosa</i>     | DQ846232 |
| Eudicotyledons | Asteraceae     | <i>Centaurea</i>    | <i>Centaurea corymbosa</i>     | DQ846233 |
| Eudicotyledons | Asteraceae     | <i>Centaurea</i>    | <i>Centaurea corymbosa</i>     | DQ846234 |
| Eudicotyledons | Asteraceae     | <i>Centaurea</i>    | <i>Centaurea corymbosa</i>     | DQ846235 |
| Eudicotyledons | Asteraceae     | <i>Centaurea</i>    | <i>Centaurea corymbosa</i>     | DQ846236 |
| Eudicotyledons | Rosaceae       | <i>Prunus</i>       | <i>Prunus mandshurica</i>      | AY500619 |
| Eudicotyledons | Rosaceae       | <i>Prunus</i>       | <i>Prunus mandshurica</i>      | JN046639 |
| Eudicotyledons | Rosaceae       | <i>Prunus</i>       | <i>Prunus mandshurica</i>      | JN046640 |
| Eudicotyledons | Rosaceae       | <i>Prunus</i>       | <i>Prunus mandshurica</i>      | JN046641 |
| Eudicotyledons | Platanaceae    | <i>Platanus</i>     | <i>Platanus orientalis</i>     | HE661218 |
| Eudicotyledons | Platanaceae    | <i>Platanus</i>     | <i>Platanus orientalis</i>     | HE661219 |
| Eudicotyledons | Platanaceae    | <i>Platanus</i>     | <i>Platanus orientalis</i>     | HE661220 |
| Eudicotyledons | Platanaceae    | <i>Platanus</i>     | <i>Platanus orientalis</i>     | HE661221 |
| Eudicotyledons | Platanaceae    | <i>Platanus</i>     | <i>Platanus orientalis</i>     | HE661222 |
| Eudicotyledons | Plantaginaceae | <i>Veronica</i>     | <i>Veronica thomsonii</i>      | FJ848128 |
| Eudicotyledons | Plantaginaceae | <i>Veronica</i>     | <i>Veronica thomsonii</i>      | FJ848130 |
| Eudicotyledons | Amaranthaceae  | <i>Amaranthus</i>   | <i>Amaranthus albus</i>        | JN043879 |
| Eudicotyledons | Amaranthaceae  | <i>Amaranthus</i>   | <i>Amaranthus albus</i>        | JN043880 |
| Eudicotyledons | Amaranthaceae  | <i>Amaranthus</i>   | <i>Amaranthus albus</i>        | JN043881 |
| Eudicotyledons | Amaranthaceae  | <i>Amaranthus</i>   | <i>Amaranthus albus</i>        | JN043882 |
| Eudicotyledons | Amaranthaceae  | <i>Amaranthus</i>   | <i>Amaranthus retroflexus</i>  | HQ596591 |
| Eudicotyledons | Amaranthaceae  | <i>Amaranthus</i>   | <i>Amaranthus retroflexus</i>  | JN043886 |

|                |                 |                   |                                |          |
|----------------|-----------------|-------------------|--------------------------------|----------|
| Eudicotyledons | Amaranthaceae   | <i>Amaranthus</i> | <i>Amaranthus retroflexus</i>  | JN043887 |
| Eudicotyledons | Amaranthaceae   | <i>Amaranthus</i> | <i>Amaranthus retroflexus</i>  | JN043888 |
| Eudicotyledons | Amaranthaceae   | <i>Amaranthus</i> | <i>Amaranthus retroflexus</i>  | JN043889 |
| Eudicotyledons | Amaranthaceae   | <i>Amaranthus</i> | <i>Amaranthus retroflexus</i>  | JN043890 |
| Eudicotyledons | Amaranthaceae   | <i>Amaranthus</i> | <i>Amaranthus retroflexus</i>  | JN043891 |
| Eudicotyledons | Amaranthaceae   | <i>Amaranthus</i> | <i>Amaranthus retroflexus</i>  | JN043892 |
| Eudicotyledons | Amaranthaceae   | <i>Amaranthus</i> | <i>Amaranthus retroflexus</i>  | JN043893 |
| Eudicotyledons | Amaranthaceae   | <i>Amaranthus</i> | <i>Amaranthus spinosus</i>     | GQ248243 |
| Eudicotyledons | Amaranthaceae   | <i>Amaranthus</i> | <i>Amaranthus spinosus</i>     | DQ006132 |
| Eudicotyledons | Amaranthaceae   | <i>Amaranthus</i> | <i>Amaranthus spinosus</i>     | DQ006133 |
| Eudicotyledons | Amaranthaceae   | <i>Amaranthus</i> | <i>Amaranthus spinosus</i>     | JN043894 |
| Eudicotyledons | Amaranthaceae   | <i>Amaranthus</i> | <i>Amaranthus spinosus</i>     | JN043895 |
| Eudicotyledons | Amaranthaceae   | <i>Amaranthus</i> | <i>Amaranthus spinosus</i>     | JN043896 |
| Eudicotyledons | Amaranthaceae   | <i>Amaranthus</i> | <i>Amaranthus spinosus</i>     | JN043897 |
| Eudicotyledons | Amaranthaceae   | <i>Amaranthus</i> | <i>Amaranthus spinosus</i>     | JN043898 |
| Eudicotyledons | Amaranthaceae   | <i>Amaranthus</i> | <i>Amaranthus spinosus</i>     | JN043899 |
| Eudicotyledons | Amaranthaceae   | <i>Amaranthus</i> | <i>Amaranthus spinosus</i>     | JN043900 |
| Eudicotyledons | Amaranthaceae   | <i>Amaranthus</i> | <i>Amaranthus spinosus</i>     | JN043901 |
| Eudicotyledons | Asteraceae      | <i>Centaurea</i>  | <i>Centaurea paniculata</i>    | DQ846189 |
| Eudicotyledons | Asteraceae      | <i>Centaurea</i>  | <i>Centaurea paniculata</i>    | DQ846190 |
| Eudicotyledons | Asteraceae      | <i>Centaurea</i>  | <i>Centaurea paniculata</i>    | DQ846191 |
| Eudicotyledons | Oleaceae        | <i>Fraxinus</i>   | <i>Fraxinus dipetala</i>       | HM367415 |
| Eudicotyledons | Oleaceae        | <i>Fraxinus</i>   | <i>Fraxinus dipetala</i>       | HM367416 |
| Eudicotyledons | Oleaceae        | <i>Fraxinus</i>   | <i>Fraxinus greggii</i>        | HM367428 |
| Eudicotyledons | Oleaceae        | <i>Fraxinus</i>   | <i>Fraxinus greggii</i>        | HM367429 |
| Eudicotyledons | Oleaceae        | <i>Fraxinus</i>   | <i>Fraxinus greggii</i>        | HM367430 |
| Eudicotyledons | Oleaceae        | <i>Fraxinus</i>   | <i>Fraxinus greggii</i>        | HM367431 |
| Eudicotyledons | Oleaceae        | <i>Fraxinus</i>   | <i>Fraxinus greggii</i>        | HM367432 |
| Eudicotyledons | Oleaceae        | <i>Fraxinus</i>   | <i>Fraxinus greggii</i>        | HM367433 |
| Eudicotyledons | Oleaceae        | <i>Fraxinus</i>   | <i>Fraxinus xanthoxyloides</i> | HM367580 |
| Eudicotyledons | Oleaceae        | <i>Fraxinus</i>   | <i>Fraxinus xanthoxyloides</i> | HM367581 |
| Eudicotyledons | Oleaceae        | <i>Fraxinus</i>   | <i>Fraxinus xanthoxyloides</i> | HM367582 |
| Eudicotyledons | Oleaceae        | <i>Fraxinus</i>   | <i>Fraxinus xanthoxyloides</i> | HM367583 |
| Eudicotyledons | Oleaceae        | <i>Fraxinus</i>   | <i>Fraxinus xanthoxyloides</i> | HM367584 |
| Eudicotyledons | Oleaceae        | <i>Fraxinus</i>   | <i>Fraxinus xanthoxyloides</i> | HM367585 |
| Eudicotyledons | Oleaceae        | <i>Fraxinus</i>   | <i>Fraxinus xanthoxyloides</i> | HM367586 |
| Eudicotyledons | Rosaceae        | <i>Rosa</i>       | <i>Rosa phoenicia</i>          | AB043944 |
| Eudicotyledons | Rosaceae        | <i>Rosa</i>       | <i>Rosa phoenicia</i>          | AB043945 |
| Eudicotyledons | Rosaceae        | <i>Rosa</i>       | <i>Rosa phoenicia</i>          | AB043946 |
| Eudicotyledons | Rosaceae        | <i>Prunus</i>     | <i>Prunus virginiana</i>       | GU562409 |
| Eudicotyledons | Rosaceae        | <i>Prunus</i>     | <i>Prunus virginiana</i>       | HQ596804 |
| Eudicotyledons | Rosaceae        | <i>Prunus</i>     | <i>Prunus virginiana</i>       | GQ248381 |
| Eudicotyledons | Rosaceae        | <i>Prunus</i>     | <i>Prunus virginiana</i>       | EF590734 |
| Eudicotyledons | Rosaceae        | <i>Prunus</i>     | <i>Prunus virginiana</i>       | AY500634 |
| Eudicotyledons | Grossulariaceae | <i>Ribes</i>      | <i>Ribes alpinum</i>           | HQ596813 |
| Eudicotyledons | Grossulariaceae | <i>Ribes</i>      | <i>Ribes alpinum</i>           | AY138094 |
| Eudicotyledons | Grossulariaceae | <i>Ribes</i>      | <i>Ribes uva-crispa</i>        | GU361913 |
| Eudicotyledons | Grossulariaceae | <i>Ribes</i>      | <i>Ribes uva-crispa</i>        | AY138077 |
| Eudicotyledons | Rosaceae        | <i>Rosa</i>       | <i>Rosa arvensis</i>           | DQ778748 |
| Eudicotyledons | Rosaceae        | <i>Rosa</i>       | <i>Rosa arvensis</i>           | FJ395545 |
| Eudicotyledons | Gentianaceae    | <i>Swertia</i>    | <i>Swertia macrosperma</i>     | JN047287 |
| Eudicotyledons | Gentianaceae    | <i>Swertia</i>    | <i>Swertia macrosperma</i>     | JN047288 |
| Eudicotyledons | Gentianaceae    | <i>Swertia</i>    | <i>Swertia macrosperma</i>     | JN047289 |

|                |              |                |                              |          |
|----------------|--------------|----------------|------------------------------|----------|
| Eudicotyledons | Gentianaceae | <i>Swertia</i> | <i>Swertia macrosperma</i>   | JN047290 |
| Eudicotyledons | Gentianaceae | <i>Swertia</i> | <i>Swertia macrosperma</i>   | JN047291 |
| Eudicotyledons | Gentianaceae | <i>Swertia</i> | <i>Swertia punicea</i>       | JN047292 |
| Eudicotyledons | Gentianaceae | <i>Swertia</i> | <i>Swertia punicea</i>       | JN047293 |
| Eudicotyledons | Gentianaceae | <i>Swertia</i> | <i>Swertia punicea</i>       | JN047294 |
| Eudicotyledons | Gentianaceae | <i>Swertia</i> | <i>Swertia punicea</i>       | JN047295 |
| Eudicotyledons | Gentianaceae | <i>Swertia</i> | <i>Swertia punicea</i>       | JN047296 |
| Eudicotyledons | Polygonaceae | <i>Rheum</i>   | <i>Rheum officinale</i>      | GQ435476 |
| Eudicotyledons | Polygonaceae | <i>Rheum</i>   | <i>Rheum officinale</i>      | GQ435477 |
| Eudicotyledons | Polygonaceae | <i>Rheum</i>   | <i>Rheum officinale</i>      | GQ435478 |
| Eudicotyledons | Polygonaceae | <i>Rheum</i>   | <i>Rheum officinale</i>      | EU554041 |
| Eudicotyledons | Polygonaceae | <i>Rheum</i>   | <i>Rheum palmatum</i>        | GQ435479 |
| Eudicotyledons | Polygonaceae | <i>Rheum</i>   | <i>Rheum palmatum</i>        | EU554042 |
| Eudicotyledons | Polygonaceae | <i>Rheum</i>   | <i>Rheum tanguticum</i>      | GQ435480 |
| Eudicotyledons | Polygonaceae | <i>Rheum</i>   | <i>Rheum tanguticum</i>      | GQ435481 |
| Eudicotyledons | Polygonaceae | <i>Rheum</i>   | <i>Rheum tanguticum</i>      | GQ435482 |
| Eudicotyledons | Polygonaceae | <i>Rheum</i>   | <i>Rheum tanguticum</i>      | EU554043 |
| Eudicotyledons | Polygonaceae | <i>Rumex</i>   | <i>Rumex patientia</i>       | JN047055 |
| Eudicotyledons | Polygonaceae | <i>Rumex</i>   | <i>Rumex patientia</i>       | JN047056 |
| Eudicotyledons | Polygonaceae | <i>Rumex</i>   | <i>Rumex patientia</i>       | JN047057 |
| Eudicotyledons | Gentianaceae | <i>Swertia</i> | <i>Swertia erythrosticta</i> | JN047282 |
| Eudicotyledons | Gentianaceae | <i>Swertia</i> | <i>Swertia erythrosticta</i> | JN047283 |
| Eudicotyledons | Fabaceae     | <i>Acacia</i>  | <i>Acacia catechu</i>        | GQ434968 |
| Eudicotyledons | Fabaceae     | <i>Acacia</i>  | <i>Acacia catechu</i>        | GQ434969 |
| Eudicotyledons | Fabaceae     | <i>Acacia</i>  | <i>Acacia catechu</i>        | GQ434970 |
| Eudicotyledons | Fabaceae     | <i>Acacia</i>  | <i>Acacia melanoxydon</i>    | AF195712 |
| Eudicotyledons | Fabaceae     | <i>Acacia</i>  | <i>Acacia melanoxydon</i>    | FJ808525 |
| Eudicotyledons | Fabaceae     | <i>Acacia</i>  | <i>Acacia melanoxydon</i>    | FJ808526 |
| Eudicotyledons | Fabaceae     | <i>Acacia</i>  | <i>Acacia melanoxydon</i>    | FJ808527 |
| Eudicotyledons | Fabaceae     | <i>Acacia</i>  | <i>Acacia melanoxydon</i>    | FJ808528 |
| Eudicotyledons | Fabaceae     | <i>Acacia</i>  | <i>Acacia melanoxydon</i>    | FJ808532 |
| Eudicotyledons | Fabaceae     | <i>Acacia</i>  | <i>Acacia melanoxydon</i>    | FJ808533 |
| Eudicotyledons | Fabaceae     | <i>Acacia</i>  | <i>Acacia melanoxydon</i>    | FJ808534 |
| Eudicotyledons | Fabaceae     | <i>Acacia</i>  | <i>Acacia nilotica</i>       | AF524993 |
| Eudicotyledons | Fabaceae     | <i>Acacia</i>  | <i>Acacia nilotica</i>       | FJ808555 |
| Eudicotyledons | Fabaceae     | <i>Acacia</i>  | <i>Acacia nilotica</i>       | FJ808557 |
| Eudicotyledons | Fabaceae     | <i>Acacia</i>  | <i>Acacia nilotica</i>       | FJ808558 |
| Eudicotyledons | Fabaceae     | <i>Acacia</i>  | <i>Acacia nilotica</i>       | FJ808559 |
| Eudicotyledons | Fabaceae     | <i>Acacia</i>  | <i>Acacia nilotica</i>       | FJ808562 |
| Eudicotyledons | Fabaceae     | <i>Acacia</i>  | <i>Acacia nilotica</i>       | FJ808563 |
| Eudicotyledons | Fabaceae     | <i>Acacia</i>  | <i>Acacia nilotica</i>       | FJ808565 |
| Eudicotyledons | Fabaceae     | <i>Acacia</i>  | <i>Acacia nilotica</i>       | FJ808566 |
| Eudicotyledons | Fabaceae     | <i>Acacia</i>  | <i>Acacia nilotica</i>       | GQ872326 |
| Eudicotyledons | Fabaceae     | <i>Acacia</i>  | <i>Acacia senegal</i>        | AF195718 |
| Eudicotyledons | Fabaceae     | <i>Acacia</i>  | <i>Acacia senegal</i>        | AF524996 |
| Eudicotyledons | Fabaceae     | <i>Acacia</i>  | <i>Acacia tortilis</i>       | EU213786 |
| Eudicotyledons | Fabaceae     | <i>Acacia</i>  | <i>Acacia tortilis</i>       | EU213787 |
| Eudicotyledons | Fabaceae     | <i>Acacia</i>  | <i>Acacia tortilis</i>       | EU213788 |
| Eudicotyledons | Fabaceae     | <i>Acacia</i>  | <i>Acacia tortilis</i>       | AF524994 |
| Eudicotyledons | Fabaceae     | <i>Acacia</i>  | <i>Acacia tortilis</i>       | GQ872341 |
| Eudicotyledons | Fabaceae     | <i>Acacia</i>  | <i>Acacia schweinfurthii</i> | AF524999 |
| Eudicotyledons | Fabaceae     | <i>Acacia</i>  | <i>Acacia schweinfurthii</i> | GQ872333 |
| Eudicotyledons | Fabaceae     | <i>Acacia</i>  | <i>Acacia schweinfurthii</i> | EU811944 |

|                |                |                    |                               |          |
|----------------|----------------|--------------------|-------------------------------|----------|
| Eudicotyledons | Fabaceae       | <i>Acacia</i>      | <i>Acacia longifolia</i>      | AF195722 |
| Eudicotyledons | Fabaceae       | <i>Acacia</i>      | <i>Acacia longifolia</i>      | FJ808515 |
| Eudicotyledons | Fabaceae       | <i>Acacia</i>      | <i>Acacia longifolia</i>      | FJ808516 |
| Eudicotyledons | Fabaceae       | <i>Acacia</i>      | <i>Acacia longifolia</i>      | FJ808517 |
| Eudicotyledons | Fabaceae       | <i>Acacia</i>      | <i>Acacia longifolia</i>      | FJ808518 |
| Eudicotyledons | Fabaceae       | <i>Acacia</i>      | <i>Acacia longifolia</i>      | FJ808519 |
| Eudicotyledons | Fabaceae       | <i>Acacia</i>      | <i>Acacia longifolia</i>      | FJ808520 |
| Eudicotyledons | Fabaceae       | <i>Acacia</i>      | <i>Acacia longifolia</i>      | FJ808521 |
| Eudicotyledons | Fabaceae       | <i>Acacia</i>      | <i>Acacia longifolia</i>      | FJ808522 |
| Eudicotyledons | Fabaceae       | <i>Acacia</i>      | <i>Acacia longifolia</i>      | FJ808523 |
| Eudicotyledons | Asteraceae     | <i>Arctium</i>     | <i>Arctium minus</i>          | FJ395501 |
| Eudicotyledons | Asteraceae     | <i>Arctium</i>     | <i>Arctium minus</i>          | HQ596603 |
| Eudicotyledons | Asteraceae     | <i>Carlina</i>     | <i>Carlina gummifera</i>      | HE659555 |
| Eudicotyledons | Asteraceae     | <i>Carlina</i>     | <i>Carlina gummifera</i>      | EU571447 |
| Eudicotyledons | Asteraceae     | <i>Carlina</i>     | <i>Carlina lanata</i>         | HE602472 |
| Eudicotyledons | Asteraceae     | <i>Carlina</i>     | <i>Carlina lanata</i>         | EU571446 |
| Eudicotyledons | Plantaginaceae | <i>Antirrhinum</i> | <i>Antirrhinum meonanthum</i> | HM152926 |
| Eudicotyledons | Plantaginaceae | <i>Antirrhinum</i> | <i>Antirrhinum meonanthum</i> | HM152927 |
| Eudicotyledons | Asteraceae     | <i>Centaurea</i>   | <i>Centaurea prolongi</i>     | FJ459721 |
| Eudicotyledons | Asteraceae     | <i>Centaurea</i>   | <i>Centaurea prolongi</i>     | FJ459722 |
| Eudicotyledons | Aquifoliaceae  | <i>Ilex</i>        | <i>Ilex cornuta</i>           | GQ434981 |
| Eudicotyledons | Aquifoliaceae  | <i>Ilex</i>        | <i>Ilex cornuta</i>           | GQ434982 |
| Eudicotyledons | Aquifoliaceae  | <i>Ilex</i>        | <i>Ilex cornuta</i>           | EU359378 |
| Eudicotyledons | Aquifoliaceae  | <i>Ilex</i>        | <i>Ilex cornuta</i>           | JN044938 |
| Eudicotyledons | Aquifoliaceae  | <i>Ilex</i>        | <i>Ilex cornuta</i>           | JN044939 |
| Eudicotyledons | Aquifoliaceae  | <i>Ilex</i>        | <i>Ilex cornuta</i>           | JN044940 |
| Eudicotyledons | Aquifoliaceae  | <i>Ilex</i>        | <i>Ilex cornuta</i>           | JN044941 |
| Eudicotyledons | Aquifoliaceae  | <i>Ilex</i>        | <i>Ilex cornuta</i>           | JN044942 |
| Eudicotyledons | Aquifoliaceae  | <i>Ilex</i>        | <i>Ilex cornuta</i>           | JN044943 |
| Eudicotyledons | Gentianaceae   | <i>Swertia</i>     | <i>Swertia bimaculata</i>     | JN047270 |
| Eudicotyledons | Gentianaceae   | <i>Swertia</i>     | <i>Swertia bimaculata</i>     | JN047271 |
| Eudicotyledons | Gentianaceae   | <i>Swertia</i>     | <i>Swertia cincta</i>         | JN047272 |
| Eudicotyledons | Gentianaceae   | <i>Swertia</i>     | <i>Swertia cincta</i>         | JN047273 |
| Eudicotyledons | Gentianaceae   | <i>Swertia</i>     | <i>Swertia cincta</i>         | JN047274 |
| Eudicotyledons | Gentianaceae   | <i>Swertia</i>     | <i>Swertia cincta</i>         | JN047275 |
| Eudicotyledons | Gentianaceae   | <i>Swertia</i>     | <i>Swertia cincta</i>         | JN047276 |
| Eudicotyledons | Gentianaceae   | <i>Swertia</i>     | <i>Swertia cincta</i>         | JN047277 |
| Eudicotyledons | Asteraceae     | <i>Arnica</i>      | <i>Arnica dealbata</i>        | AM690595 |
| Eudicotyledons | Asteraceae     | <i>Arnica</i>      | <i>Arnica dealbata</i>        | AY215626 |
| Eudicotyledons | Asteraceae     | <i>Arnica</i>      | <i>Arnica longifolia</i>      | AM690563 |
| Eudicotyledons | Asteraceae     | <i>Arnica</i>      | <i>Arnica longifolia</i>      | AM690586 |
| Eudicotyledons | Rosaceae       | <i>Prunus</i>      | <i>Prunus mira</i>            | AY500627 |
| Eudicotyledons | Rosaceae       | <i>Prunus</i>      | <i>Prunus mira</i>            | JN046642 |
| Eudicotyledons | Rosaceae       | <i>Prunus</i>      | <i>Prunus mira</i>            | JN046643 |
| Eudicotyledons | Rosaceae       | <i>Prunus</i>      | <i>Prunus mira</i>            | JN046644 |
| Eudicotyledons | Rosaceae       | <i>Prunus</i>      | <i>Prunus mira</i>            | JN046645 |
| Eudicotyledons | Rosaceae       | <i>Prunus</i>      | <i>Prunus mira</i>            | JN046646 |
| Eudicotyledons | Rosaceae       | <i>Prunus</i>      | <i>Prunus davidiana</i>       | AY500626 |
| Eudicotyledons | Rosaceae       | <i>Prunus</i>      | <i>Prunus davidiana</i>       | JN046610 |
| Eudicotyledons | Rosaceae       | <i>Prunus</i>      | <i>Prunus davidiana</i>       | JN046611 |
| Eudicotyledons | Rosaceae       | <i>Prunus</i>      | <i>Prunus davidiana</i>       | JN046612 |
| Eudicotyledons | Rosaceae       | <i>Prunus</i>      | <i>Prunus davidiana</i>       | JN046613 |
| Eudicotyledons | Rosaceae       | <i>Prunus</i>      | <i>Prunus davidiana</i>       | JN046614 |



|                |                |                   |                             |          |
|----------------|----------------|-------------------|-----------------------------|----------|
| Eudicotyledons | Rosaceae       | <i>Prunus</i>     | <i>Prunus mexicana</i>      | AY500596 |
| Eudicotyledons | Rosaceae       | <i>Prunus</i>     | <i>Prunus mexicana</i>      | AY500599 |
| Eudicotyledons | Rosaceae       | <i>Prunus</i>     | <i>Prunus sibirica</i>      | GQ435274 |
| Eudicotyledons | Rosaceae       | <i>Prunus</i>     | <i>Prunus sibirica</i>      | JN046662 |
| Eudicotyledons | Rosaceae       | <i>Prunus</i>     | <i>Prunus sibirica</i>      | JN046663 |
| Eudicotyledons | Rosaceae       | <i>Prunus</i>     | <i>Prunus sibirica</i>      | JN046664 |
| Eudicotyledons | Rosaceae       | <i>Prunus</i>     | <i>Prunus sibirica</i>      | JN046665 |
| Eudicotyledons | Rosaceae       | <i>Prunus</i>     | <i>Prunus sibirica</i>      | JN046666 |
| Eudicotyledons | Rosaceae       | <i>Prunus</i>     | <i>Prunus sibirica</i>      | JN046667 |
| Eudicotyledons | Vitaceae       | <i>Vitis</i>      | <i>Vitis flexuosa</i>       | JQ182524 |
| Eudicotyledons | Vitaceae       | <i>Vitis</i>      | <i>Vitis flexuosa</i>       | HM585789 |
| Eudicotyledons | Vitaceae       | <i>Vitis</i>      | <i>Vitis flexuosa</i>       | HQ108312 |
| Eudicotyledons | Vitaceae       | <i>Vitis</i>      | <i>Vitis flexuosa</i>       | HQ656442 |
| Eudicotyledons | Vitaceae       | <i>Vitis</i>      | <i>Vitis flexuosa</i>       | HQ656453 |
| Eudicotyledons | Vitaceae       | <i>Vitis</i>      | <i>Vitis flexuosa</i>       | HQ656463 |
| Eudicotyledons | Vitaceae       | <i>Vitis</i>      | <i>Vitis flexuosa</i>       | HQ656466 |
| Eudicotyledons | Vitaceae       | <i>Vitis</i>      | <i>Vitis thunbergii</i>     | HQ108315 |
| Eudicotyledons | Vitaceae       | <i>Vitis</i>      | <i>Vitis thunbergii</i>     | JF437167 |
| Eudicotyledons | Apiaceae       | <i>Eryngium</i>   | <i>Eryngium giganteum</i>   | GQ385241 |
| Eudicotyledons | Apiaceae       | <i>Eryngium</i>   | <i>Eryngium giganteum</i>   | FJ475136 |
| Eudicotyledons | Passifloraceae | <i>Passiflora</i> | <i>Passiflora foetida</i>   | AY032814 |
| Eudicotyledons | Passifloraceae | <i>Passiflora</i> | <i>Passiflora foetida</i>   | AY220136 |
| Eudicotyledons | Passifloraceae | <i>Passiflora</i> | <i>Passiflora foetida</i>   | DQ238759 |
| Eudicotyledons | Passifloraceae | <i>Passiflora</i> | <i>Passiflora elegans</i>   | AY032806 |
| Eudicotyledons | Passifloraceae | <i>Passiflora</i> | <i>Passiflora elegans</i>   | AY219300 |
| Eudicotyledons | Passifloraceae | <i>Passiflora</i> | <i>Passiflora elegans</i>   | AY219301 |
| Eudicotyledons | Passifloraceae | <i>Passiflora</i> | <i>Passiflora elegans</i>   | AY219302 |
| Eudicotyledons | Passifloraceae | <i>Passiflora</i> | <i>Passiflora elegans</i>   | AY219303 |
| Eudicotyledons | Passifloraceae | <i>Passiflora</i> | <i>Passiflora elegans</i>   | AY219304 |
| Eudicotyledons | Passifloraceae | <i>Passiflora</i> | <i>Passiflora elegans</i>   | AY219305 |
| Eudicotyledons | Passifloraceae | <i>Passiflora</i> | <i>Passiflora elegans</i>   | AY219306 |
| Eudicotyledons | Passifloraceae | <i>Passiflora</i> | <i>Passiflora elegans</i>   | AY219307 |
| Eudicotyledons | Passifloraceae | <i>Passiflora</i> | <i>Passiflora elegans</i>   | AY219308 |
| Eudicotyledons | Passifloraceae | <i>Passiflora</i> | <i>Passiflora elegans</i>   | AY219309 |
| Eudicotyledons | Passifloraceae | <i>Passiflora</i> | <i>Passiflora elegans</i>   | AY219310 |
| Eudicotyledons | Passifloraceae | <i>Passiflora</i> | <i>Passiflora actinia</i>   | AY032807 |
| Eudicotyledons | Passifloraceae | <i>Passiflora</i> | <i>Passiflora actinia</i>   | AY219288 |
| Eudicotyledons | Passifloraceae | <i>Passiflora</i> | <i>Passiflora actinia</i>   | AY219289 |
| Eudicotyledons | Passifloraceae | <i>Passiflora</i> | <i>Passiflora actinia</i>   | AY219290 |
| Eudicotyledons | Passifloraceae | <i>Passiflora</i> | <i>Passiflora actinia</i>   | AY219291 |
| Eudicotyledons | Passifloraceae | <i>Passiflora</i> | <i>Passiflora actinia</i>   | AY219292 |
| Eudicotyledons | Passifloraceae | <i>Passiflora</i> | <i>Passiflora actinia</i>   | AY219293 |
| Eudicotyledons | Passifloraceae | <i>Passiflora</i> | <i>Passiflora actinia</i>   | AY219294 |
| Eudicotyledons | Passifloraceae | <i>Passiflora</i> | <i>Passiflora actinia</i>   | AY219295 |
| Eudicotyledons | Passifloraceae | <i>Passiflora</i> | <i>Passiflora actinia</i>   | AY219296 |
| Eudicotyledons | Passifloraceae | <i>Passiflora</i> | <i>Passiflora actinia</i>   | AY219297 |
| Eudicotyledons | Passifloraceae | <i>Passiflora</i> | <i>Passiflora actinia</i>   | AY219298 |
| Eudicotyledons | Passifloraceae | <i>Passiflora</i> | <i>Passiflora actinia</i>   | AY219299 |
| Eudicotyledons | Passifloraceae | <i>Passiflora</i> | <i>Passiflora incarnata</i> | AY032810 |
| Eudicotyledons | Passifloraceae | <i>Passiflora</i> | <i>Passiflora incarnata</i> | GQ248361 |
| Eudicotyledons | Passifloraceae | <i>Passiflora</i> | <i>Passiflora incarnata</i> | EF590722 |
| Eudicotyledons | Passifloraceae | <i>Passiflora</i> | <i>Passiflora incarnata</i> | DQ238757 |
| Eudicotyledons | Passifloraceae | <i>Passiflora</i> | <i>Passiflora galbana</i>   | AY032817 |

|                |                |                   |                               |          |
|----------------|----------------|-------------------|-------------------------------|----------|
| Eudicotyledons | Passifloraceae | <i>Passiflora</i> | <i>Passiflora galbana</i>     | AY220137 |
| Eudicotyledons | Passifloraceae | <i>Passiflora</i> | <i>Passiflora tenuifila</i>   | AY032813 |
| Eudicotyledons | Passifloraceae | <i>Passiflora</i> | <i>Passiflora tenuifila</i>   | AY220140 |
| Eudicotyledons | Passifloraceae | <i>Passiflora</i> | <i>Passiflora caerulea</i>    | AY032816 |
| Eudicotyledons | Passifloraceae | <i>Passiflora</i> | <i>Passiflora caerulea</i>    | AY220135 |
| Eudicotyledons | Cornaceae      | <i>Nyssa</i>      | <i>Nyssa yunnanensis</i>      | EU734469 |
| Eudicotyledons | Cornaceae      | <i>Nyssa</i>      | <i>Nyssa yunnanensis</i>      | EU734470 |
| Eudicotyledons | Plantaginaceae | <i>Veronica</i>   | <i>Veronica serpyllifolia</i> | HQ596886 |
| Eudicotyledons | Plantaginaceae | <i>Veronica</i>   | <i>Veronica serpyllifolia</i> | HQ596887 |
| Eudicotyledons | Vitaceae       | <i>Leea</i>       | <i>Leea indica</i>            | HM585679 |
| Eudicotyledons | Vitaceae       | <i>Leea</i>       | <i>Leea indica</i>            | JF437123 |
| Eudicotyledons | Plantaginaceae | <i>Veronica</i>   | <i>Veronica spicata</i>       | HQ327970 |
| Eudicotyledons | Plantaginaceae | <i>Veronica</i>   | <i>Veronica spicata</i>       | HQ327971 |
| Eudicotyledons | Plantaginaceae | <i>Veronica</i>   | <i>Veronica spicata</i>       | HQ327980 |
| Eudicotyledons | Plantaginaceae | <i>Veronica</i>   | <i>Veronica spicata</i>       | HQ327983 |
| Eudicotyledons | Plantaginaceae | <i>Veronica</i>   | <i>Veronica spicata</i>       | HQ327984 |
| Eudicotyledons | Plantaginaceae | <i>Veronica</i>   | <i>Veronica chamaedrys</i>    | HM370828 |
| Eudicotyledons | Plantaginaceae | <i>Veronica</i>   | <i>Veronica chamaedrys</i>    | HM370841 |
| Eudicotyledons | Plantaginaceae | <i>Veronica</i>   | <i>Veronica chamaedrys</i>    | HM370842 |
| Eudicotyledons | Plantaginaceae | <i>Veronica</i>   | <i>Veronica chamaedrys</i>    | HM370850 |
| Eudicotyledons | Plantaginaceae | <i>Veronica</i>   | <i>Veronica chamaedrys</i>    | HM370861 |
| Eudicotyledons | Plantaginaceae | <i>Veronica</i>   | <i>Veronica chamaedrys</i>    | HM370868 |
| Eudicotyledons | Plantaginaceae | <i>Veronica</i>   | <i>Veronica chamaedrys</i>    | HM370871 |
| Eudicotyledons | Plantaginaceae | <i>Veronica</i>   | <i>Veronica chamaedrys</i>    | HM370878 |
| Eudicotyledons | Plantaginaceae | <i>Veronica</i>   | <i>Veronica chamaedrys</i>    | HM370882 |
| Eudicotyledons | Plantaginaceae | <i>Veronica</i>   | <i>Veronica chamaedrys</i>    | HM370902 |
| Eudicotyledons | Plantaginaceae | <i>Veronica</i>   | <i>Veronica chamaedrys</i>    | HM370948 |
| Eudicotyledons | Plantaginaceae | <i>Veronica</i>   | <i>Veronica chamaedrys</i>    | HM370952 |
| Eudicotyledons | Plantaginaceae | <i>Veronica</i>   | <i>Veronica chamaedrys</i>    | HM370954 |
| Eudicotyledons | Plantaginaceae | <i>Veronica</i>   | <i>Veronica chamaedrys</i>    | HM370955 |
| Eudicotyledons | Plantaginaceae | <i>Veronica</i>   | <i>Veronica chamaedrys</i>    | HM370956 |
| Eudicotyledons | Solanaceae     | <i>Capsicum</i>   | <i>Capsicum tovarii</i>       | EF537211 |
| Eudicotyledons | Solanaceae     | <i>Capsicum</i>   | <i>Capsicum tovarii</i>       | EF537212 |
| Eudicotyledons | Solanaceae     | <i>Capsicum</i>   | <i>Capsicum tovarii</i>       | EF537213 |
| Eudicotyledons | Solanaceae     | <i>Capsicum</i>   | <i>Capsicum tovarii</i>       | EF537214 |
| Eudicotyledons | Solanaceae     | <i>Capsicum</i>   | <i>Capsicum tovarii</i>       | EF537215 |
| Eudicotyledons | Solanaceae     | <i>Capsicum</i>   | <i>Capsicum tovarii</i>       | EF537216 |
| Eudicotyledons | Rosaceae       | <i>Prunus</i>     | <i>Prunus ferganensis</i>     | JN046620 |
| Eudicotyledons | Rosaceae       | <i>Prunus</i>     | <i>Prunus ferganensis</i>     | JN046621 |
| Eudicotyledons | Rosaceae       | <i>Prunus</i>     | <i>Prunus ferganensis</i>     | JN046622 |
| Eudicotyledons | Rosaceae       | <i>Prunus</i>     | <i>Prunus ferganensis</i>     | JN046623 |
| Eudicotyledons | Rosaceae       | <i>Prunus</i>     | <i>Prunus ferganensis</i>     | JN046624 |
| Eudicotyledons | Oleaceae       | <i>Fraxinus</i>   | <i>Fraxinus angustifolia</i>  | HE659569 |
| Eudicotyledons | Oleaceae       | <i>Fraxinus</i>   | <i>Fraxinus angustifolia</i>  | HM367365 |
| Eudicotyledons | Oleaceae       | <i>Fraxinus</i>   | <i>Fraxinus angustifolia</i>  | HM367366 |
| Eudicotyledons | Oleaceae       | <i>Fraxinus</i>   | <i>Fraxinus angustifolia</i>  | HM367367 |
| Eudicotyledons | Oleaceae       | <i>Fraxinus</i>   | <i>Fraxinus angustifolia</i>  | HM367368 |
| Eudicotyledons | Oleaceae       | <i>Fraxinus</i>   | <i>Fraxinus angustifolia</i>  | HM367369 |
| Eudicotyledons | Oleaceae       | <i>Fraxinus</i>   | <i>Fraxinus angustifolia</i>  | HM367370 |
| Eudicotyledons | Oleaceae       | <i>Fraxinus</i>   | <i>Fraxinus angustifolia</i>  | HM367371 |
| Eudicotyledons | Oleaceae       | <i>Fraxinus</i>   | <i>Fraxinus angustifolia</i>  | HM367372 |
| Eudicotyledons | Oleaceae       | <i>Fraxinus</i>   | <i>Fraxinus angustifolia</i>  | HM367373 |
| Eudicotyledons | Oleaceae       | <i>Fraxinus</i>   | <i>Fraxinus angustifolia</i>  | HM367374 |

|                |                 |                 |                              |          |
|----------------|-----------------|-----------------|------------------------------|----------|
| Eudicotyledons | Oleaceae        | <i>Fraxinus</i> | <i>Fraxinus angustifolia</i> | HM367375 |
| Eudicotyledons | Oleaceae        | <i>Fraxinus</i> | <i>Fraxinus angustifolia</i> | HM367376 |
| Eudicotyledons | Oleaceae        | <i>Fraxinus</i> | <i>Fraxinus angustifolia</i> | HM367377 |
| Eudicotyledons | Oleaceae        | <i>Fraxinus</i> | <i>Fraxinus angustifolia</i> | HM367378 |
| Eudicotyledons | Gentianaceae    | <i>Swertia</i>  | <i>Swertia decora</i>        | JN047278 |
| Eudicotyledons | Gentianaceae    | <i>Swertia</i>  | <i>Swertia decora</i>        | JN047279 |
| Eudicotyledons | Gentianaceae    | <i>Swertia</i>  | <i>Swertia decora</i>        | JN047280 |
| Eudicotyledons | Gentianaceae    | <i>Swertia</i>  | <i>Swertia decora</i>        | JN047281 |
| Eudicotyledons | Gentianaceae    | <i>Swertia</i>  | <i>Swertia yunnanensis</i>   | JN047301 |
| Eudicotyledons | Gentianaceae    | <i>Swertia</i>  | <i>Swertia yunnanensis</i>   | JN047302 |
| Eudicotyledons | Aceraceae       | <i>Acer</i>     | <i>Acer davidii</i>          | HM008573 |
| Eudicotyledons | Aceraceae       | <i>Acer</i>     | <i>Acer davidii</i>          | JN043713 |
| Eudicotyledons | Aceraceae       | <i>Acer</i>     | <i>Acer davidii</i>          | JN043714 |
| Eudicotyledons | Aceraceae       | <i>Acer</i>     | <i>Acer davidii</i>          | JN043715 |
| Eudicotyledons | Aceraceae       | <i>Acer</i>     | <i>Acer davidii</i>          | JN043716 |
| Eudicotyledons | Aceraceae       | <i>Acer</i>     | <i>Acer davidii</i>          | JN043717 |
| Eudicotyledons | Aceraceae       | <i>Acer</i>     | <i>Acer davidii</i>          | JN043718 |
| Eudicotyledons | Aceraceae       | <i>Acer</i>     | <i>Acer davidii</i>          | JN043719 |
| Eudicotyledons | Aceraceae       | <i>Acer</i>     | <i>Acer davidii</i>          | JN043720 |
| Eudicotyledons | Aceraceae       | <i>Acer</i>     | <i>Acer davidii</i>          | JN043721 |
| Eudicotyledons | Rubiaceae       | <i>Luculia</i>  | <i>Luculia pinceana</i>      | JN045267 |
| Eudicotyledons | Rubiaceae       | <i>Luculia</i>  | <i>Luculia pinceana</i>      | JN045268 |
| Eudicotyledons | Rubiaceae       | <i>Luculia</i>  | <i>Luculia pinceana</i>      | JN045269 |
| Eudicotyledons | Rubiaceae       | <i>Luculia</i>  | <i>Luculia pinceana</i>      | JN045270 |
| Eudicotyledons | Rubiaceae       | <i>Luculia</i>  | <i>Luculia pinceana</i>      | JN045271 |
| Eudicotyledons | Aceraceae       | <i>Acer</i>     | <i>Acer erythranthum</i>     | HM352717 |
| Eudicotyledons | Aceraceae       | <i>Acer</i>     | <i>Acer erythranthum</i>     | HM352718 |
| Eudicotyledons | Begoniaceae     | <i>Begonia</i>  | <i>Begonia cirrosa</i>       | JN044017 |
| Eudicotyledons | Begoniaceae     | <i>Begonia</i>  | <i>Begonia cirrosa</i>       | JN044018 |
| Eudicotyledons | Begoniaceae     | <i>Begonia</i>  | <i>Begonia longicarpa</i>    | JN044076 |
| Eudicotyledons | Begoniaceae     | <i>Begonia</i>  | <i>Begonia longicarpa</i>    | JN044077 |
| Eudicotyledons | Begoniaceae     | <i>Begonia</i>  | <i>Begonia longicarpa</i>    | JN044078 |
| Eudicotyledons | Begoniaceae     | <i>Begonia</i>  | <i>Begonia longicarpa</i>    | JN044079 |
| Eudicotyledons | Begoniaceae     | <i>Begonia</i>  | <i>Begonia longicarpa</i>    | JN044080 |
| Eudicotyledons | Begoniaceae     | <i>Begonia</i>  | <i>Begonia ruboides</i>      | JN044126 |
| Eudicotyledons | Begoniaceae     | <i>Begonia</i>  | <i>Begonia ruboides</i>      | JN044127 |
| Eudicotyledons | Begoniaceae     | <i>Begonia</i>  | <i>Begonia ruboides</i>      | JN044128 |
| Eudicotyledons | Begoniaceae     | <i>Begonia</i>  | <i>Begonia ruboides</i>      | JN044129 |
| Eudicotyledons | Begoniaceae     | <i>Begonia</i>  | <i>Begonia ruboides</i>      | JN044130 |
| Eudicotyledons | Begoniaceae     | <i>Begonia</i>  | <i>Begonia ruboides</i>      | JN044131 |
| Eudicotyledons | Polygonaceae    | <i>Rumex</i>    | <i>Rumex crispus</i>         | FJ395508 |
| Eudicotyledons | Polygonaceae    | <i>Rumex</i>    | <i>Rumex crispus</i>         | HQ596828 |
| Eudicotyledons | Polygonaceae    | <i>Rumex</i>    | <i>Rumex crispus</i>         | JN047048 |
| Eudicotyledons | Polygonaceae    | <i>Rumex</i>    | <i>Rumex crispus</i>         | JN047049 |
| Eudicotyledons | Polygonaceae    | <i>Rumex</i>    | <i>Rumex nepalensis</i>      | JN047050 |
| Eudicotyledons | Polygonaceae    | <i>Rumex</i>    | <i>Rumex nepalensis</i>      | JN047051 |
| Eudicotyledons | Polygonaceae    | <i>Rumex</i>    | <i>Rumex nepalensis</i>      | JN047052 |
| Eudicotyledons | Grossulariaceae | <i>Ribes</i>    | <i>Ribes alpestre</i>        | AY138059 |
| Eudicotyledons | Grossulariaceae | <i>Ribes</i>    | <i>Ribes alpestre</i>        | JN047033 |
| Eudicotyledons | Grossulariaceae | <i>Ribes</i>    | <i>Ribes alpestre</i>        | JN047034 |
| Eudicotyledons | Grossulariaceae | <i>Ribes</i>    | <i>Ribes alpestre</i>        | JN047035 |
| Eudicotyledons | Grossulariaceae | <i>Ribes</i>    | <i>Ribes alpestre</i>        | JN047036 |
| Eudicotyledons | Grossulariaceae | <i>Ribes</i>    | <i>Ribes alpestre</i>        | JN047037 |

|                |                 |                     |                                  |          |
|----------------|-----------------|---------------------|----------------------------------|----------|
| Eudicotyledons | Grossulariaceae | <i>Ribes</i>        | <i>Ribes alpestre</i>            | JN047038 |
| Eudicotyledons | Grossulariaceae | <i>Ribes</i>        | <i>Ribes alpestre</i>            | JN047039 |
| Eudicotyledons | Grossulariaceae | <i>Ribes</i>        | <i>Ribes lacustre</i>            | HQ596817 |
| Eudicotyledons | Grossulariaceae | <i>Ribes</i>        | <i>Ribes lacustre</i>            | AY138092 |
| Eudicotyledons | Grossulariaceae | <i>Ribes</i>        | <i>Ribes rubrum</i>              | FJ395461 |
| Eudicotyledons | Grossulariaceae | <i>Ribes</i>        | <i>Ribes rubrum</i>              | HQ596818 |
| Eudicotyledons | Grossulariaceae | <i>Ribes</i>        | <i>Ribes rubrum</i>              | AY138108 |
| Eudicotyledons | Ericaceae       | <i>Rhododendron</i> | <i>Rhododendron arboreum</i>     | JN046748 |
| Eudicotyledons | Ericaceae       | <i>Rhododendron</i> | <i>Rhododendron arboreum</i>     | JN046749 |
| Eudicotyledons | Ericaceae       | <i>Rhododendron</i> | <i>Rhododendron arboreum</i>     | JN046750 |
| Eudicotyledons | Ericaceae       | <i>Rhododendron</i> | <i>Rhododendron arboreum</i>     | JN046751 |
| Eudicotyledons | Fabaceae        | <i>Acacia</i>       | <i>Acacia acuminata</i>          | HQ170465 |
| Eudicotyledons | Fabaceae        | <i>Acacia</i>       | <i>Acacia acuminata</i>          | HQ170466 |
| Eudicotyledons | Fabaceae        | <i>Acacia</i>       | <i>Acacia ampliceps</i>          | AF525003 |
| Eudicotyledons | Fabaceae        | <i>Acacia</i>       | <i>Acacia ampliceps</i>          | EU811962 |
| Eudicotyledons | Cornaceae       | <i>Cornus</i>       | <i>Cornus sericea</i>            | EU750452 |
| Eudicotyledons | Cornaceae       | <i>Cornus</i>       | <i>Cornus sericea</i>            | EU750453 |
| Eudicotyledons | Cornaceae       | <i>Cornus</i>       | <i>Cornus sericea</i>            | EU750454 |
| Eudicotyledons | Cornaceae       | <i>Cornus</i>       | <i>Cornus sericea</i>            | EU750455 |
| Eudicotyledons | Asteraceae      | <i>Santolina</i>    | <i>Santolina africana</i>        | JF345721 |
| Eudicotyledons | Asteraceae      | <i>Santolina</i>    | <i>Santolina africana</i>        | JF345722 |
| Eudicotyledons | Asteraceae      | <i>Santolina</i>    | <i>Santolina africana</i>        | JF345724 |
| Eudicotyledons | Brassicaceae    | <i>Brassica</i>     | <i>Brassica maurorum</i>         | AB669905 |
| Eudicotyledons | Brassicaceae    | <i>Brassica</i>     | <i>Brassica maurorum</i>         | AB669906 |
| Eudicotyledons | Burseraceae     | <i>Bursera</i>      | <i>Bursera cinerea</i>           | GQ377874 |
| Eudicotyledons | Burseraceae     | <i>Bursera</i>      | <i>Bursera cinerea</i>           | GQ377875 |
| Eudicotyledons | Ericaceae       | <i>Rhododendron</i> | <i>Rhododendron leptothrium</i>  | JN046865 |
| Eudicotyledons | Ericaceae       | <i>Rhododendron</i> | <i>Rhododendron leptothrium</i>  | JN046866 |
| Eudicotyledons | Ericaceae       | <i>Rhododendron</i> | <i>Rhododendron leptothrium</i>  | JN046867 |
| Eudicotyledons | Ericaceae       | <i>Rhododendron</i> | <i>Rhododendron leptothrium</i>  | JN046868 |
| Eudicotyledons | Ericaceae       | <i>Rhododendron</i> | <i>Rhododendron mackenzianum</i> | JN046872 |
| Eudicotyledons | Ericaceae       | <i>Rhododendron</i> | <i>Rhododendron mackenzianum</i> | JN046873 |
| Eudicotyledons | Ericaceae       | <i>Rhododendron</i> | <i>Rhododendron mackenzianum</i> | JN046874 |
| Eudicotyledons | Ericaceae       | <i>Rhododendron</i> | <i>Rhododendron spinuliferum</i> | JN046974 |
| Eudicotyledons | Ericaceae       | <i>Rhododendron</i> | <i>Rhododendron spinuliferum</i> | JN046975 |
| Eudicotyledons | Ericaceae       | <i>Rhododendron</i> | <i>Rhododendron vialii</i>       | HQ707031 |
| Eudicotyledons | Ericaceae       | <i>Rhododendron</i> | <i>Rhododendron vialii</i>       | HQ707032 |
| Eudicotyledons | Myrtaceae       | <i>Eucalyptus</i>   | <i>Eucalyptus melliodora</i>     | GQ248304 |
| Eudicotyledons | Myrtaceae       | <i>Eucalyptus</i>   | <i>Eucalyptus melliodora</i>     | EF590699 |
| Eudicotyledons | Ericaceae       | <i>Rhododendron</i> | <i>Rhododendron fortunei</i>     | HQ706969 |
| Eudicotyledons | Ericaceae       | <i>Rhododendron</i> | <i>Rhododendron fortunei</i>     | HQ706970 |
| Eudicotyledons | Ericaceae       | <i>Rhododendron</i> | <i>Rhododendron fortunei</i>     | HQ706971 |
| Eudicotyledons | Ericaceae       | <i>Rhododendron</i> | <i>Rhododendron fortunei</i>     | HQ706972 |
| Eudicotyledons | Ericaceae       | <i>Rhododendron</i> | <i>Rhododendron latoucheae</i>   | HQ426990 |
| Eudicotyledons | Ericaceae       | <i>Rhododendron</i> | <i>Rhododendron latoucheae</i>   | HQ706992 |
| Eudicotyledons | Ericaceae       | <i>Rhododendron</i> | <i>Rhododendron pachypodum</i>   | JN046917 |
| Eudicotyledons | Ericaceae       | <i>Rhododendron</i> | <i>Rhododendron pachypodum</i>   | JN046918 |
| Eudicotyledons | Ericaceae       | <i>Rhododendron</i> | <i>Rhododendron pachypodum</i>   | JN046919 |
| Eudicotyledons | Ericaceae       | <i>Rhododendron</i> | <i>Rhododendron racemosum</i>    | JN046932 |
| Eudicotyledons | Ericaceae       | <i>Rhododendron</i> | <i>Rhododendron racemosum</i>    | JN046933 |
| Eudicotyledons | Ericaceae       | <i>Rhododendron</i> | <i>Rhododendron racemosum</i>    | JN046934 |
| Eudicotyledons | Ericaceae       | <i>Rhododendron</i> | <i>Rhododendron trichocladum</i> | JN046996 |
| Eudicotyledons | Ericaceae       | <i>Rhododendron</i> | <i>Rhododendron trichocladum</i> | JN046997 |

|                |               |                     |                                  |          |
|----------------|---------------|---------------------|----------------------------------|----------|
| Eudicotyledons | Ericaceae     | <i>Rhododendron</i> | <i>Rhododendron trichocladum</i> | JN046998 |
| Eudicotyledons | Aquifoliaceae | <i>Ilex</i>         | <i>Ilex asprella</i>             | JN406922 |
| Eudicotyledons | Aquifoliaceae | <i>Ilex</i>         | <i>Ilex asprella</i>             | JN406923 |
| Eudicotyledons | Aquifoliaceae | <i>Ilex</i>         | <i>Ilex paraguariensis</i>       | GQ248322 |
| Eudicotyledons | Aquifoliaceae | <i>Ilex</i>         | <i>Ilex paraguariensis</i>       | EU359321 |
| Eudicotyledons | Aquifoliaceae | <i>Ilex</i>         | <i>Ilex paraguariensis</i>       | EF590705 |
| Eudicotyledons | Aquifoliaceae | <i>Ilex</i>         | <i>Ilex pubescens</i>            | HQ415418 |
| Eudicotyledons | Aquifoliaceae | <i>Ilex</i>         | <i>Ilex pubescens</i>            | HQ426982 |
| Eudicotyledons | Aquifoliaceae | <i>Ilex</i>         | <i>Ilex purpurea</i>             | HQ426983 |
| Eudicotyledons | Aquifoliaceae | <i>Ilex</i>         | <i>Ilex purpurea</i>             | EU359331 |
| Eudicotyledons | Fabaceae      | <i>Wisteria</i>     | <i>Wisteria brachybotrys</i>     | EU424093 |
| Eudicotyledons | Fabaceae      | <i>Wisteria</i>     | <i>Wisteria brachybotrys</i>     | EU424094 |
| Eudicotyledons | Asteraceae    | <i>Ligularia</i>    | <i>Ligularia hodgsonii</i>       | GQ435102 |
| Eudicotyledons | Asteraceae    | <i>Ligularia</i>    | <i>Ligularia hodgsonii</i>       | AB369628 |
| Eudicotyledons | Asteraceae    | <i>Ligularia</i>    | <i>Ligularia virgaurea</i>       | JN045216 |
| Eudicotyledons | Asteraceae    | <i>Ligularia</i>    | <i>Ligularia virgaurea</i>       | JN045217 |
| Eudicotyledons | Asteraceae    | <i>Ligularia</i>    | <i>Ligularia virgaurea</i>       | JN045218 |
| Eudicotyledons | Asteraceae    | <i>Ligularia</i>    | <i>Ligularia virgaurea</i>       | JN045219 |
| Eudicotyledons | Asteraceae    | <i>Ligularia</i>    | <i>Ligularia stenocephala</i>    | AB369632 |
| Eudicotyledons | Asteraceae    | <i>Ligularia</i>    | <i>Ligularia stenocephala</i>    | EF538078 |
| Eudicotyledons | Asteraceae    | <i>Jacobaea</i>     | <i>Jacobaea erucifolia</i>       | FJ395460 |
| Eudicotyledons | Asteraceae    | <i>Jacobaea</i>     | <i>Jacobaea erucifolia</i>       | AY155652 |
| Eudicotyledons | Fabaceae      | <i>Leucaena</i>     | <i>Leucaena diversifolia</i>     | EF643867 |
| Eudicotyledons | Fabaceae      | <i>Leucaena</i>     | <i>Leucaena diversifolia</i>     | EF643869 |
| Eudicotyledons | Fabaceae      | <i>Leucaena</i>     | <i>Leucaena diversifolia</i>     | EF643881 |
| Eudicotyledons | Fabaceae      | <i>Leucaena</i>     | <i>Leucaena diversifolia</i>     | EF643882 |
| Eudicotyledons | Fabaceae      | <i>Leucaena</i>     | <i>Leucaena pulverulenta</i>     | EF643865 |
| Eudicotyledons | Fabaceae      | <i>Leucaena</i>     | <i>Leucaena pulverulenta</i>     | EF643872 |
| Eudicotyledons | Ericaceae     | <i>Rhododendron</i> | <i>Rhododendron pendulum</i>     | JN046920 |
| Eudicotyledons | Ericaceae     | <i>Rhododendron</i> | <i>Rhododendron pendulum</i>     | JN046921 |
| Eudicotyledons | Ericaceae     | <i>Rhododendron</i> | <i>Rhododendron virgatum</i>     | JN047012 |
| Eudicotyledons | Ericaceae     | <i>Rhododendron</i> | <i>Rhododendron virgatum</i>     | JN047013 |
| Eudicotyledons | Ericaceae     | <i>Rhododendron</i> | <i>Rhododendron virgatum</i>     | HQ707033 |
| Eudicotyledons | Ericaceae     | <i>Rhododendron</i> | <i>Rhododendron virgatum</i>     | HQ707034 |
| Eudicotyledons | Loasaceae     | <i>Mentzelia</i>    | <i>Mentzelia albicaulis</i>      | FJ918127 |
| Eudicotyledons | Loasaceae     | <i>Mentzelia</i>    | <i>Mentzelia albicaulis</i>      | FJ918128 |
| Eudicotyledons | Loasaceae     | <i>Mentzelia</i>    | <i>Mentzelia albicaulis</i>      | FJ918129 |
| Eudicotyledons | Loasaceae     | <i>Mentzelia</i>    | <i>Mentzelia albicaulis</i>      | FJ918130 |
| Eudicotyledons | Loasaceae     | <i>Mentzelia</i>    | <i>Mentzelia dispersa</i>        | FJ918150 |
| Eudicotyledons | Loasaceae     | <i>Mentzelia</i>    | <i>Mentzelia dispersa</i>        | FJ918151 |
| Eudicotyledons | Loasaceae     | <i>Mentzelia</i>    | <i>Mentzelia dispersa</i>        | JF321280 |
| Eudicotyledons | Loasaceae     | <i>Mentzelia</i>    | <i>Mentzelia gracilentia</i>     | FJ918155 |
| Eudicotyledons | Loasaceae     | <i>Mentzelia</i>    | <i>Mentzelia gracilentia</i>     | FJ918156 |
| Eudicotyledons | Loasaceae     | <i>Mentzelia</i>    | <i>Mentzelia gracilentia</i>     | FJ918157 |
| Eudicotyledons | Begoniaceae   | <i>Begonia</i>      | <i>Begonia masoniana</i>         | JN044096 |
| Eudicotyledons | Begoniaceae   | <i>Begonia</i>      | <i>Begonia masoniana</i>         | JN044097 |
| Eudicotyledons | Begoniaceae   | <i>Begonia</i>      | <i>Begonia masoniana</i>         | JN044098 |
| Eudicotyledons | Fabaceae      | <i>Acacia</i>       | <i>Acacia galpinii</i>           | AF525010 |
| Eudicotyledons | Fabaceae      | <i>Acacia</i>       | <i>Acacia galpinii</i>           | GQ872313 |
| Eudicotyledons | Fabaceae      | <i>Acacia</i>       | <i>Acacia galpinii</i>           | EU811968 |
| Eudicotyledons | Fabaceae      | <i>Albizia</i>      | <i>Albizia kalkora</i>           | HQ426986 |
| Eudicotyledons | Fabaceae      | <i>Albizia</i>      | <i>Albizia kalkora</i>           | AF524965 |
| Eudicotyledons | Lamiaceae     | <i>Ajuga</i>        | <i>Ajuga ciliata</i>             | JQ339253 |

|                |                 |                  |                               |          |
|----------------|-----------------|------------------|-------------------------------|----------|
| Eudicotyledons | Lamiaceae       | <i>Ajuga</i>     | <i>Ajuga ciliata</i>          | JQ339254 |
| Eudicotyledons | Lamiaceae       | <i>Ajuga</i>     | <i>Ajuga ciliata</i>          | JQ339255 |
| Eudicotyledons | Lamiaceae       | <i>Ajuga</i>     | <i>Ajuga ciliata</i>          | FJ513092 |
| Eudicotyledons | Asteraceae      | <i>Saussurea</i> | <i>Saussurea involucrata</i>  | GQ435128 |
| Eudicotyledons | Asteraceae      | <i>Saussurea</i> | <i>Saussurea involucrata</i>  | EF420893 |
| Eudicotyledons | Plantaginaceae  | <i>Veronica</i>  | <i>Veronica vindobonensis</i> | HM370833 |
| Eudicotyledons | Plantaginaceae  | <i>Veronica</i>  | <i>Veronica vindobonensis</i> | HM370855 |
| Eudicotyledons | Plantaginaceae  | <i>Veronica</i>  | <i>Veronica vindobonensis</i> | HM370857 |
| Eudicotyledons | Plantaginaceae  | <i>Veronica</i>  | <i>Veronica vindobonensis</i> | HM370858 |
| Eudicotyledons | Plantaginaceae  | <i>Veronica</i>  | <i>Veronica vindobonensis</i> | HM370859 |
| Eudicotyledons | Plantaginaceae  | <i>Veronica</i>  | <i>Veronica vindobonensis</i> | HM370864 |
| Eudicotyledons | Plantaginaceae  | <i>Veronica</i>  | <i>Veronica vindobonensis</i> | HM370865 |
| Eudicotyledons | Plantaginaceae  | <i>Veronica</i>  | <i>Veronica vindobonensis</i> | HM370866 |
| Eudicotyledons | Plantaginaceae  | <i>Veronica</i>  | <i>Veronica vindobonensis</i> | HM370872 |
| Eudicotyledons | Plantaginaceae  | <i>Veronica</i>  | <i>Veronica vindobonensis</i> | HM370874 |
| Eudicotyledons | Plantaginaceae  | <i>Veronica</i>  | <i>Veronica vindobonensis</i> | HM370877 |
| Eudicotyledons | Plantaginaceae  | <i>Veronica</i>  | <i>Veronica vindobonensis</i> | HM370879 |
| Eudicotyledons | Plantaginaceae  | <i>Veronica</i>  | <i>Veronica vindobonensis</i> | HM370880 |
| Eudicotyledons | Plantaginaceae  | <i>Veronica</i>  | <i>Veronica vindobonensis</i> | HM370881 |
| Eudicotyledons | Plantaginaceae  | <i>Veronica</i>  | <i>Veronica vindobonensis</i> | HM370883 |
| Eudicotyledons | Plantaginaceae  | <i>Veronica</i>  | <i>Veronica vindobonensis</i> | HM370910 |
| Eudicotyledons | Plantaginaceae  | <i>Veronica</i>  | <i>Veronica vindobonensis</i> | HM370913 |
| Eudicotyledons | Plantaginaceae  | <i>Veronica</i>  | <i>Veronica vindobonensis</i> | HM370914 |
| Eudicotyledons | Plantaginaceae  | <i>Veronica</i>  | <i>Veronica vindobonensis</i> | HM370922 |
| Eudicotyledons | Plantaginaceae  | <i>Veronica</i>  | <i>Veronica vindobonensis</i> | HM370923 |
| Eudicotyledons | Plantaginaceae  | <i>Veronica</i>  | <i>Veronica vindobonensis</i> | HM370924 |
| Eudicotyledons | Plantaginaceae  | <i>Veronica</i>  | <i>Veronica vindobonensis</i> | HM370926 |
| Eudicotyledons | Plantaginaceae  | <i>Veronica</i>  | <i>Veronica vindobonensis</i> | HM370929 |
| Eudicotyledons | Plantaginaceae  | <i>Veronica</i>  | <i>Veronica vindobonensis</i> | HM370934 |
| Eudicotyledons | Plantaginaceae  | <i>Veronica</i>  | <i>Veronica vindobonensis</i> | HM370935 |
| Eudicotyledons | Plantaginaceae  | <i>Veronica</i>  | <i>Veronica vindobonensis</i> | HM370941 |
| Eudicotyledons | Ranunculaceae   | <i>Eranthis</i>  | <i>Eranthis pinnatifida</i>   | JF505843 |
| Eudicotyledons | Ranunculaceae   | <i>Eranthis</i>  | <i>Eranthis pinnatifida</i>   | JF505844 |
| Eudicotyledons | Ranunculaceae   | <i>Eranthis</i>  | <i>Eranthis pinnatifida</i>   | JF505845 |
| Eudicotyledons | Ranunculaceae   | <i>Eranthis</i>  | <i>Eranthis pinnatifida</i>   | JF505846 |
| Eudicotyledons | Ranunculaceae   | <i>Eranthis</i>  | <i>Eranthis pinnatifida</i>   | JF505847 |
| Eudicotyledons | Ranunculaceae   | <i>Eranthis</i>  | <i>Eranthis pinnatifida</i>   | JF505848 |
| Eudicotyledons | Solanaceae      | <i>Solanum</i>   | <i>Solanum aethiopicum</i>    | HM016414 |
| Eudicotyledons | Solanaceae      | <i>Solanum</i>   | <i>Solanum aethiopicum</i>    | HM016415 |
| Eudicotyledons | Solanaceae      | <i>Solanum</i>   | <i>Solanum aethiopicum</i>    | HM016416 |
| Eudicotyledons | Solanaceae      | <i>Solanum</i>   | <i>Solanum evolvulifolium</i> | HQ856093 |
| Eudicotyledons | Solanaceae      | <i>Solanum</i>   | <i>Solanum evolvulifolium</i> | HQ856094 |
| Eudicotyledons | Solanaceae      | <i>Solanum</i>   | <i>Solanum evolvulifolium</i> | HQ856095 |
| Eudicotyledons | Solanaceae      | <i>Solanum</i>   | <i>Solanum evolvulifolium</i> | HQ856096 |
| Eudicotyledons | Solanaceae      | <i>Solanum</i>   | <i>Solanum phaseoloides</i>   | HQ856097 |
| Eudicotyledons | Solanaceae      | <i>Solanum</i>   | <i>Solanum phaseoloides</i>   | HQ856098 |
| Eudicotyledons | Grossulariaceae | <i>Ribes</i>     | <i>Ribes glaciale</i>         | AY138097 |
| Eudicotyledons | Grossulariaceae | <i>Ribes</i>     | <i>Ribes glaciale</i>         | JN047040 |
| Eudicotyledons | Grossulariaceae | <i>Ribes</i>     | <i>Ribes glaciale</i>         | JN047041 |
| Eudicotyledons | Grossulariaceae | <i>Ribes</i>     | <i>Ribes cynosbati</i>        | HQ596816 |
| Eudicotyledons | Grossulariaceae | <i>Ribes</i>     | <i>Ribes cynosbati</i>        | AY138063 |
| Eudicotyledons | Grossulariaceae | <i>Ribes</i>     | <i>Ribes orientale</i>        | AY138099 |
| Eudicotyledons | Grossulariaceae | <i>Ribes</i>     | <i>Ribes orientale</i>        | JN047045 |

|                |                 |                    |                                     |          |
|----------------|-----------------|--------------------|-------------------------------------|----------|
| Eudicotyledons | Grossulariaceae | <i>Ribes</i>       | <i>Ribes orientale</i>              | JN047046 |
| Eudicotyledons | Grossulariaceae | <i>Ribes</i>       | <i>Ribes orientale</i>              | JN047047 |
| Eudicotyledons | Grossulariaceae | <i>Ribes</i>       | <i>Ribes himalense</i>              | AY138106 |
| Eudicotyledons | Grossulariaceae | <i>Ribes</i>       | <i>Ribes himalense</i>              | JN047042 |
| Eudicotyledons | Grossulariaceae | <i>Ribes</i>       | <i>Ribes himalense</i>              | JN047043 |
| Eudicotyledons | Grossulariaceae | <i>Ribes</i>       | <i>Ribes himalense</i>              | JN047044 |
| Eudicotyledons | Burseraceae     | <i>Canarium</i>    | <i>Canarium tramdenum</i>           | HQ415435 |
| Eudicotyledons | Burseraceae     | <i>Canarium</i>    | <i>Canarium tramdenum</i>           | AY635380 |
| Eudicotyledons | Oxalidaceae     | <i>Oxalis</i>      | <i>Oxalis corniculata</i>           | JN407013 |
| Eudicotyledons | Oxalidaceae     | <i>Oxalis</i>      | <i>Oxalis corniculata</i>           | JN407014 |
| Eudicotyledons | Oxalidaceae     | <i>Oxalis</i>      | <i>Oxalis corniculata</i>           | JN407015 |
| Eudicotyledons | Oxalidaceae     | <i>Oxalis</i>      | <i>Oxalis corniculata</i>           | JN602087 |
| Eudicotyledons | Solanaceae      | <i>Solanum</i>     | <i>Solanum viarum</i>               | GU135370 |
| Eudicotyledons | Solanaceae      | <i>Solanum</i>     | <i>Solanum viarum</i>               | GU135408 |
| Eudicotyledons | Araliaceae      | <i>Hedera</i>      | <i>Hedera sinensis</i>              | GQ435394 |
| Eudicotyledons | Araliaceae      | <i>Hedera</i>      | <i>Hedera sinensis</i>              | AY163522 |
| Eudicotyledons | Araliaceae      | <i>Hedera</i>      | <i>Hedera sinensis</i>              | GU054813 |
| Eudicotyledons | Araliaceae      | <i>Hedera</i>      | <i>Hedera sinensis</i>              | HM755916 |
| Eudicotyledons | Orobanchaceae   | <i>Pedicularis</i> | <i>Pedicularis anas</i>             | JN045888 |
| Eudicotyledons | Orobanchaceae   | <i>Pedicularis</i> | <i>Pedicularis anas</i>             | JN045889 |
| Eudicotyledons | Orobanchaceae   | <i>Pedicularis</i> | <i>Pedicularis anas</i>             | JN045890 |
| Eudicotyledons | Orobanchaceae   | <i>Pedicularis</i> | <i>Pedicularis anas</i>             | JN045891 |
| Eudicotyledons | Orobanchaceae   | <i>Pedicularis</i> | <i>Pedicularis anas</i>             | JN045892 |
| Eudicotyledons | Orobanchaceae   | <i>Pedicularis</i> | <i>Pedicularis axillaris</i>        | JN045893 |
| Eudicotyledons | Orobanchaceae   | <i>Pedicularis</i> | <i>Pedicularis axillaris</i>        | JN045894 |
| Eudicotyledons | Orobanchaceae   | <i>Pedicularis</i> | <i>Pedicularis axillaris</i>        | JN045895 |
| Eudicotyledons | Orobanchaceae   | <i>Pedicularis</i> | <i>Pedicularis axillaris</i>        | JN045896 |
| Eudicotyledons | Orobanchaceae   | <i>Pedicularis</i> | <i>Pedicularis brevilabris</i>      | JN045901 |
| Eudicotyledons | Orobanchaceae   | <i>Pedicularis</i> | <i>Pedicularis brevilabris</i>      | JN045902 |
| Eudicotyledons | Orobanchaceae   | <i>Pedicularis</i> | <i>Pedicularis brevilabris</i>      | JN045903 |
| Eudicotyledons | Orobanchaceae   | <i>Pedicularis</i> | <i>Pedicularis brevilabris</i>      | JN045904 |
| Eudicotyledons | Orobanchaceae   | <i>Pedicularis</i> | <i>Pedicularis cinerascens</i>      | JN045911 |
| Eudicotyledons | Orobanchaceae   | <i>Pedicularis</i> | <i>Pedicularis cinerascens</i>      | JN045912 |
| Eudicotyledons | Orobanchaceae   | <i>Pedicularis</i> | <i>Pedicularis confertiflora</i>    | JN045917 |
| Eudicotyledons | Orobanchaceae   | <i>Pedicularis</i> | <i>Pedicularis confertiflora</i>    | JN045918 |
| Eudicotyledons | Orobanchaceae   | <i>Pedicularis</i> | <i>Pedicularis confertiflora</i>    | JN045919 |
| Eudicotyledons | Orobanchaceae   | <i>Pedicularis</i> | <i>Pedicularis confertiflora</i>    | JN045920 |
| Eudicotyledons | Orobanchaceae   | <i>Pedicularis</i> | <i>Pedicularis confertiflora</i>    | JN045921 |
| Eudicotyledons | Orobanchaceae   | <i>Pedicularis</i> | <i>Pedicularis cyathophylla</i>     | JN045933 |
| Eudicotyledons | Orobanchaceae   | <i>Pedicularis</i> | <i>Pedicularis cyathophylla</i>     | JN045934 |
| Eudicotyledons | Orobanchaceae   | <i>Pedicularis</i> | <i>Pedicularis cyathophylla</i>     | JN045935 |
| Eudicotyledons | Orobanchaceae   | <i>Pedicularis</i> | <i>Pedicularis cyathophylla</i>     | JN045936 |
| Eudicotyledons | Orobanchaceae   | <i>Pedicularis</i> | <i>Pedicularis cyathophylla</i>     | JN045937 |
| Eudicotyledons | Orobanchaceae   | <i>Pedicularis</i> | <i>Pedicularis cyathophylloides</i> | JN045938 |
| Eudicotyledons | Orobanchaceae   | <i>Pedicularis</i> | <i>Pedicularis cyathophylloides</i> | JN045939 |
| Eudicotyledons | Orobanchaceae   | <i>Pedicularis</i> | <i>Pedicularis cyathophylloides</i> | JN045940 |
| Eudicotyledons | Orobanchaceae   | <i>Pedicularis</i> | <i>Pedicularis cyathophylloides</i> | JN045941 |
| Eudicotyledons | Orobanchaceae   | <i>Pedicularis</i> | <i>Pedicularis cyathophylloides</i> | JN045942 |
| Eudicotyledons | Orobanchaceae   | <i>Pedicularis</i> | <i>Pedicularis debilis</i>          | JN045950 |
| Eudicotyledons | Orobanchaceae   | <i>Pedicularis</i> | <i>Pedicularis debilis</i>          | JN045951 |
| Eudicotyledons | Orobanchaceae   | <i>Pedicularis</i> | <i>Pedicularis debilis</i>          | JN045952 |
| Eudicotyledons | Orobanchaceae   | <i>Pedicularis</i> | <i>Pedicularis densispica</i>       | JN045959 |
| Eudicotyledons | Orobanchaceae   | <i>Pedicularis</i> | <i>Pedicularis densispica</i>       | JN045960 |





|                |                 |                     |                                  |          |
|----------------|-----------------|---------------------|----------------------------------|----------|
| Eudicotyledons | Orobanchaceae   | <i>Pedicularis</i>  | <i>Pedicularis superba</i>       | JN046156 |
| Eudicotyledons | Orobanchaceae   | <i>Pedicularis</i>  | <i>Pedicularis trichoglossa</i>  | JN046178 |
| Eudicotyledons | Orobanchaceae   | <i>Pedicularis</i>  | <i>Pedicularis trichoglossa</i>  | JN046179 |
| Eudicotyledons | Orobanchaceae   | <i>Pedicularis</i>  | <i>Pedicularis urceolata</i>     | JN046188 |
| Eudicotyledons | Orobanchaceae   | <i>Pedicularis</i>  | <i>Pedicularis urceolata</i>     | JN046189 |
| Eudicotyledons | Orobanchaceae   | <i>Pedicularis</i>  | <i>Pedicularis urceolata</i>     | JN046190 |
| Eudicotyledons | Orobanchaceae   | <i>Pedicularis</i>  | <i>Pedicularis urceolata</i>     | JN046191 |
| Eudicotyledons | Orobanchaceae   | <i>Pedicularis</i>  | <i>Pedicularis urceolata</i>     | JN046192 |
| Eudicotyledons | Asteraceae      | <i>Ligularia</i>    | <i>Ligularia dentata</i>         | AB369645 |
| Eudicotyledons | Asteraceae      | <i>Ligularia</i>    | <i>Ligularia dentata</i>         | DQ131856 |
| Eudicotyledons | Ericaceae       | <i>Rhododendron</i> | <i>Rhododendron obtusum</i>      | HQ707006 |
| Eudicotyledons | Ericaceae       | <i>Rhododendron</i> | <i>Rhododendron obtusum</i>      | HQ707007 |
| Eudicotyledons | Adoxaceae       | <i>Viburnum</i>     | <i>Viburnum betulifolium</i>     | HQ592061 |
| Eudicotyledons | Adoxaceae       | <i>Viburnum</i>     | <i>Viburnum betulifolium</i>     | JN047484 |
| Eudicotyledons | Adoxaceae       | <i>Viburnum</i>     | <i>Viburnum betulifolium</i>     | JN047485 |
| Eudicotyledons | Adoxaceae       | <i>Viburnum</i>     | <i>Viburnum betulifolium</i>     | JN047486 |
| Eudicotyledons | Adoxaceae       | <i>Viburnum</i>     | <i>Viburnum betulifolium</i>     | JN047487 |
| Eudicotyledons | Adoxaceae       | <i>Viburnum</i>     | <i>Viburnum betulifolium</i>     | JN047488 |
| Eudicotyledons | Adoxaceae       | <i>Viburnum</i>     | <i>Viburnum betulifolium</i>     | JN047489 |
| Eudicotyledons | Vitaceae        | <i>Vitis</i>        | <i>Vitis cinerea</i>             | HQ108287 |
| Eudicotyledons | Vitaceae        | <i>Vitis</i>        | <i>Vitis cinerea</i>             | HQ108288 |
| Eudicotyledons | Vitaceae        | <i>Vitis</i>        | <i>Vitis cinerea</i>             | HQ108289 |
| Eudicotyledons | Vitaceae        | <i>Vitis</i>        | <i>Vitis cinerea</i>             | HQ656413 |
| Eudicotyledons | Vitaceae        | <i>Vitis</i>        | <i>Vitis cinerea</i>             | HQ656414 |
| Eudicotyledons | Loasaceae       | <i>Mentzelia</i>    | <i>Mentzelia congesta</i>        | FJ918139 |
| Eudicotyledons | Loasaceae       | <i>Mentzelia</i>    | <i>Mentzelia congesta</i>        | FJ918140 |
| Eudicotyledons | Loasaceae       | <i>Mentzelia</i>    | <i>Mentzelia congesta</i>        | FJ918141 |
| Eudicotyledons | Loasaceae       | <i>Mentzelia</i>    | <i>Mentzelia micrantha</i>       | FJ918166 |
| Eudicotyledons | Loasaceae       | <i>Mentzelia</i>    | <i>Mentzelia micrantha</i>       | FJ918167 |
| Eudicotyledons | Loasaceae       | <i>Mentzelia</i>    | <i>Mentzelia nitens</i>          | FJ918183 |
| Eudicotyledons | Loasaceae       | <i>Mentzelia</i>    | <i>Mentzelia nitens</i>          | FJ918184 |
| Eudicotyledons | Loasaceae       | <i>Mentzelia</i>    | <i>Mentzelia nitens</i>          | FJ918185 |
| Eudicotyledons | Loasaceae       | <i>Mentzelia</i>    | <i>Mentzelia nitens</i>          | FJ918186 |
| Eudicotyledons | Loasaceae       | <i>Mentzelia</i>    | <i>Mentzelia nitens</i>          | FJ918187 |
| Eudicotyledons | Ericaceae       | <i>Rhododendron</i> | <i>Rhododendron vaccinioides</i> | AY196031 |
| Eudicotyledons | Ericaceae       | <i>Rhododendron</i> | <i>Rhododendron vaccinioides</i> | JN047008 |
| Eudicotyledons | Ericaceae       | <i>Rhododendron</i> | <i>Rhododendron vaccinioides</i> | JN047009 |
| Eudicotyledons | Vitaceae        | <i>Vitis</i>        | <i>Vitis piasezkii</i>           | HQ108314 |
| Eudicotyledons | Vitaceae        | <i>Vitis</i>        | <i>Vitis piasezkii</i>           | HQ656444 |
| Eudicotyledons | Solanaceae      | <i>Solanum</i>      | <i>Solanum lyratum</i>           | GQ435280 |
| Eudicotyledons | Solanaceae      | <i>Solanum</i>      | <i>Solanum lyratum</i>           | JN047213 |
| Eudicotyledons | Solanaceae      | <i>Solanum</i>      | <i>Solanum lyratum</i>           | JN047214 |
| Eudicotyledons | Solanaceae      | <i>Solanum</i>      | <i>Solanum lyratum</i>           | JN047215 |
| Eudicotyledons | Solanaceae      | <i>Solanum</i>      | <i>Solanum lyratum</i>           | JN047216 |
| Eudicotyledons | Solanaceae      | <i>Solanum</i>      | <i>Solanum lyratum</i>           | JN047217 |
| Eudicotyledons | Solanaceae      | <i>Solanum</i>      | <i>Solanum lyratum</i>           | JN047218 |
| Eudicotyledons | Solanaceae      | <i>Solanum</i>      | <i>Solanum lyratum</i>           | JN047219 |
| Eudicotyledons | Caryophyllaceae | <i>Cerastium</i>    | <i>Cerastium fontanum</i>        | FJ395474 |
| Eudicotyledons | Caryophyllaceae | <i>Cerastium</i>    | <i>Cerastium fontanum</i>        | HQ596636 |
| Eudicotyledons | Vitaceae        | <i>Vitis</i>        | <i>Vitis pseudoreticulata</i>    | HQ656437 |
| Eudicotyledons | Vitaceae        | <i>Vitis</i>        | <i>Vitis pseudoreticulata</i>    | HQ656438 |
| Eudicotyledons | Vitaceae        | <i>Vitis</i>        | <i>Vitis pseudoreticulata</i>    | HQ656467 |
| Eudicotyledons | Lamiaceae       | <i>Scutellaria</i>  | <i>Scutellaria lateriflora</i>   | HQ596839 |

|                |                |                    |                                 |          |
|----------------|----------------|--------------------|---------------------------------|----------|
| Eudicotyledons | Lamiaceae      | <i>Scutellaria</i> | <i>Scutellaria lateriflora</i>  | HQ596840 |
| Eudicotyledons | Plantaginaceae | <i>Antirrhinum</i> | <i>Antirrhinum australe</i>     | HM152881 |
| Eudicotyledons | Plantaginaceae | <i>Antirrhinum</i> | <i>Antirrhinum australe</i>     | HM152882 |
| Eudicotyledons | Plantaginaceae | <i>Antirrhinum</i> | <i>Antirrhinum australe</i>     | HM152883 |
| Eudicotyledons | Plantaginaceae | <i>Antirrhinum</i> | <i>Antirrhinum charidemi</i>    | HM152886 |
| Eudicotyledons | Plantaginaceae | <i>Antirrhinum</i> | <i>Antirrhinum charidemi</i>    | HM152887 |
| Eudicotyledons | Plantaginaceae | <i>Antirrhinum</i> | <i>Antirrhinum charidemi</i>    | HM152888 |
| Eudicotyledons | Plantaginaceae | <i>Antirrhinum</i> | <i>Antirrhinum charidemi</i>    | HM152889 |
| Eudicotyledons | Plantaginaceae | <i>Antirrhinum</i> | <i>Antirrhinum latifolium</i>   | HM152907 |
| Eudicotyledons | Plantaginaceae | <i>Antirrhinum</i> | <i>Antirrhinum latifolium</i>   | HM152911 |
| Eudicotyledons | Plantaginaceae | <i>Antirrhinum</i> | <i>Antirrhinum lopesianum</i>   | HM152917 |
| Eudicotyledons | Plantaginaceae | <i>Antirrhinum</i> | <i>Antirrhinum lopesianum</i>   | HM152918 |
| Eudicotyledons | Plantaginaceae | <i>Antirrhinum</i> | <i>Antirrhinum lopesianum</i>   | HM152919 |
| Eudicotyledons | Plantaginaceae | <i>Antirrhinum</i> | <i>Antirrhinum microphyllum</i> | HM152928 |
| Eudicotyledons | Plantaginaceae | <i>Antirrhinum</i> | <i>Antirrhinum microphyllum</i> | HM152929 |
| Eudicotyledons | Plantaginaceae | <i>Antirrhinum</i> | <i>Antirrhinum microphyllum</i> | HM152930 |
| Eudicotyledons | Plantaginaceae | <i>Antirrhinum</i> | <i>Antirrhinum sempervirens</i> | HM152943 |
| Eudicotyledons | Plantaginaceae | <i>Antirrhinum</i> | <i>Antirrhinum sempervirens</i> | HM152944 |
| Eudicotyledons | Plantaginaceae | <i>Antirrhinum</i> | <i>Antirrhinum sempervirens</i> | HM152945 |
| Eudicotyledons | Adoxaceae      | <i>Viburnum</i>    | <i>Viburnum cylindricum</i>     | AY627389 |
| Eudicotyledons | Adoxaceae      | <i>Viburnum</i>    | <i>Viburnum cylindricum</i>     | JN047490 |
| Eudicotyledons | Adoxaceae      | <i>Viburnum</i>    | <i>Viburnum cylindricum</i>     | JN047491 |
| Eudicotyledons | Adoxaceae      | <i>Viburnum</i>    | <i>Viburnum cylindricum</i>     | JN047492 |
| Eudicotyledons | Adoxaceae      | <i>Viburnum</i>    | <i>Viburnum cylindricum</i>     | JN047493 |
| Eudicotyledons | Adoxaceae      | <i>Viburnum</i>    | <i>Viburnum cylindricum</i>     | JN047494 |
| Eudicotyledons | Adoxaceae      | <i>Viburnum</i>    | <i>Viburnum cylindricum</i>     | JN047495 |
| Eudicotyledons | Adoxaceae      | <i>Viburnum</i>    | <i>Viburnum dilatatum</i>       | AY627392 |
| Eudicotyledons | Adoxaceae      | <i>Viburnum</i>    | <i>Viburnum dilatatum</i>       | JN047496 |
| Eudicotyledons | Adoxaceae      | <i>Viburnum</i>    | <i>Viburnum dilatatum</i>       | JN047497 |
| Eudicotyledons | Adoxaceae      | <i>Viburnum</i>    | <i>Viburnum dilatatum</i>       | JN047498 |
| Eudicotyledons | Adoxaceae      | <i>Viburnum</i>    | <i>Viburnum dilatatum</i>       | JN047499 |
| Eudicotyledons | Adoxaceae      | <i>Viburnum</i>    | <i>Viburnum dilatatum</i>       | JN047500 |
| Eudicotyledons | Adoxaceae      | <i>Viburnum</i>    | <i>Viburnum dilatatum</i>       | JN047501 |
| Eudicotyledons | Adoxaceae      | <i>Viburnum</i>    | <i>Viburnum erosum</i>          | HQ427059 |
| Eudicotyledons | Adoxaceae      | <i>Viburnum</i>    | <i>Viburnum erosum</i>          | AY627396 |
| Eudicotyledons | Adoxaceae      | <i>Viburnum</i>    | <i>Viburnum erosum</i>          | JN047502 |
| Eudicotyledons | Adoxaceae      | <i>Viburnum</i>    | <i>Viburnum erosum</i>          | JN047503 |
| Eudicotyledons | Adoxaceae      | <i>Viburnum</i>    | <i>Viburnum erosum</i>          | JN047504 |
| Eudicotyledons | Adoxaceae      | <i>Viburnum</i>    | <i>Viburnum erosum</i>          | JN047505 |
| Eudicotyledons | Adoxaceae      | <i>Viburnum</i>    | <i>Viburnum erosum</i>          | JN047506 |
| Eudicotyledons | Adoxaceae      | <i>Viburnum</i>    | <i>Viburnum odoratissimum</i>   | HQ415464 |
| Eudicotyledons | Adoxaceae      | <i>Viburnum</i>    | <i>Viburnum odoratissimum</i>   | AY627411 |
| Eudicotyledons | Adoxaceae      | <i>Viburnum</i>    | <i>Viburnum prunifolium</i>     | AY627413 |
| Eudicotyledons | Adoxaceae      | <i>Viburnum</i>    | <i>Viburnum prunifolium</i>     | DQ006167 |
| Eudicotyledons | Adoxaceae      | <i>Viburnum</i>    | <i>Viburnum stenocalyx</i>      | HQ592097 |
| Eudicotyledons | Adoxaceae      | <i>Viburnum</i>    | <i>Viburnum stenocalyx</i>      | AY627418 |
| Eudicotyledons | Adoxaceae      | <i>Viburnum</i>    | <i>Viburnum triphyllum</i>      | HQ592105 |
| Eudicotyledons | Adoxaceae      | <i>Viburnum</i>    | <i>Viburnum triphyllum</i>      | AY627422 |
| Eudicotyledons | Adoxaceae      | <i>Viburnum</i>    | <i>Viburnum utile</i>           | AY627424 |
| Eudicotyledons | Adoxaceae      | <i>Viburnum</i>    | <i>Viburnum utile</i>           | JN047526 |
| Eudicotyledons | Adoxaceae      | <i>Viburnum</i>    | <i>Viburnum utile</i>           | JN047527 |
| Eudicotyledons | Asteraceae     | <i>Saussurea</i>   | <i>Saussurea katochaete</i>     | EF420899 |
| Eudicotyledons | Asteraceae     | <i>Saussurea</i>   | <i>Saussurea katochaete</i>     | EF420900 |

|                |               |                    |                             |          |
|----------------|---------------|--------------------|-----------------------------|----------|
| Eudicotyledons | Amaranthaceae | <i>Chenopodium</i> | <i>Chenopodium foliosum</i> | JN044293 |
| Eudicotyledons | Amaranthaceae | <i>Chenopodium</i> | <i>Chenopodium foliosum</i> | JN044294 |
| Eudicotyledons | Solanaceae    | <i>Capsicum</i>    | <i>Capsicum flexuosum</i>   | EF537229 |
| Eudicotyledons | Solanaceae    | <i>Capsicum</i>    | <i>Capsicum flexuosum</i>   | EF537230 |
| Eudicotyledons | Solanaceae    | <i>Capsicum</i>    | <i>Capsicum flexuosum</i>   | EF537231 |
| Eudicotyledons | Solanaceae    | <i>Capsicum</i>    | <i>Capsicum flexuosum</i>   | EF537232 |
| Eudicotyledons | Saxifragaceae | <i>Mitella</i>     | <i>Mitella doiana</i>       | AB492557 |
| Eudicotyledons | Saxifragaceae | <i>Mitella</i>     | <i>Mitella doiana</i>       | AB492558 |
| Eudicotyledons | Saxifragaceae | <i>Mitella</i>     | <i>Mitella doiana</i>       | AB492559 |
| Eudicotyledons | Saxifragaceae | <i>Mitella</i>     | <i>Mitella kiusiana</i>     | AB492580 |
| Eudicotyledons | Saxifragaceae | <i>Mitella</i>     | <i>Mitella kiusiana</i>     | AB492581 |
| Eudicotyledons | Saxifragaceae | <i>Mitella</i>     | <i>Mitella kiusiana</i>     | AB492582 |
| Eudicotyledons | Saxifragaceae | <i>Mitella</i>     | <i>Mitella kiusiana</i>     | AB492583 |
| Eudicotyledons | Saxifragaceae | <i>Mitella</i>     | <i>Mitella kiusiana</i>     | AB492584 |
| Eudicotyledons | Saxifragaceae | <i>Mitella</i>     | <i>Mitella kiusiana</i>     | AB492585 |
| Eudicotyledons | Saxifragaceae | <i>Mitella</i>     | <i>Mitella kiusiana</i>     | AB492586 |
| Eudicotyledons | Saxifragaceae | <i>Mitella</i>     | <i>Mitella kiusiana</i>     | AB492587 |
| Eudicotyledons | Saxifragaceae | <i>Mitella</i>     | <i>Mitella kiusiana</i>     | AB492588 |
| Eudicotyledons | Saxifragaceae | <i>Mitella</i>     | <i>Mitella kiusiana</i>     | AB492589 |
| Eudicotyledons | Saxifragaceae | <i>Mitella</i>     | <i>Mitella kiusiana</i>     | AB492590 |
| Eudicotyledons | Saxifragaceae | <i>Mitella</i>     | <i>Mitella koshiensis</i>   | AB492612 |
| Eudicotyledons | Saxifragaceae | <i>Mitella</i>     | <i>Mitella koshiensis</i>   | AB492613 |
| Eudicotyledons | Saxifragaceae | <i>Mitella</i>     | <i>Mitella koshiensis</i>   | AB492614 |
| Eudicotyledons | Saxifragaceae | <i>Mitella</i>     | <i>Mitella koshiensis</i>   | AB492615 |
| Eudicotyledons | Saxifragaceae | <i>Mitella</i>     | <i>Mitella koshiensis</i>   | AB492616 |
| Eudicotyledons | Saxifragaceae | <i>Mitella</i>     | <i>Mitella formosana</i>    | AB492549 |
| Eudicotyledons | Saxifragaceae | <i>Mitella</i>     | <i>Mitella formosana</i>    | AB492550 |
| Eudicotyledons | Saxifragaceae | <i>Mitella</i>     | <i>Mitella formosana</i>    | AB492551 |
| Eudicotyledons | Saxifragaceae | <i>Mitella</i>     | <i>Mitella formosana</i>    | AB492552 |
| Eudicotyledons | Saxifragaceae | <i>Mitella</i>     | <i>Mitella formosana</i>    | AB492553 |
| Eudicotyledons | Saxifragaceae | <i>Mitella</i>     | <i>Mitella formosana</i>    | AB492554 |
| Eudicotyledons | Saxifragaceae | <i>Mitella</i>     | <i>Mitella formosana</i>    | AB492555 |
| Eudicotyledons | Saxifragaceae | <i>Mitella</i>     | <i>Mitella formosana</i>    | AB492556 |
| Eudicotyledons | Cucurbitaceae | <i>Bryonia</i>     | <i>Bryonia alba</i>         | EU096317 |
| Eudicotyledons | Cucurbitaceae | <i>Bryonia</i>     | <i>Bryonia alba</i>         | EU096318 |
| Eudicotyledons | Cucurbitaceae | <i>Bryonia</i>     | <i>Bryonia alba</i>         | EU096319 |
| Eudicotyledons | Cucurbitaceae | <i>Bryonia</i>     | <i>Bryonia alba</i>         | EU096320 |
| Eudicotyledons | Cucurbitaceae | <i>Bryonia</i>     | <i>Bryonia alba</i>         | EU096321 |
| Eudicotyledons | Cucurbitaceae | <i>Bryonia</i>     | <i>Bryonia alba</i>         | EU096322 |
| Eudicotyledons | Cucurbitaceae | <i>Bryonia</i>     | <i>Bryonia alba</i>         | EU096323 |
| Eudicotyledons | Cucurbitaceae | <i>Bryonia</i>     | <i>Bryonia alba</i>         | EU096324 |
| Eudicotyledons | Cucurbitaceae | <i>Bryonia</i>     | <i>Bryonia alba</i>         | EU096325 |
| Eudicotyledons | Cucurbitaceae | <i>Bryonia</i>     | <i>Bryonia alba</i>         | EU096326 |
| Eudicotyledons | Cucurbitaceae | <i>Bryonia</i>     | <i>Bryonia alba</i>         | EU096327 |
| Eudicotyledons | Cucurbitaceae | <i>Bryonia</i>     | <i>Bryonia alba</i>         | EU096328 |
| Eudicotyledons | Cucurbitaceae | <i>Bryonia</i>     | <i>Bryonia alba</i>         | EU096329 |
| Eudicotyledons | Cucurbitaceae | <i>Bryonia</i>     | <i>Bryonia alba</i>         | EU096330 |
| Eudicotyledons | Cucurbitaceae | <i>Bryonia</i>     | <i>Bryonia alba</i>         | EU096331 |
| Eudicotyledons | Cucurbitaceae | <i>Bryonia</i>     | <i>Bryonia alba</i>         | EU096332 |
| Eudicotyledons | Cucurbitaceae | <i>Bryonia</i>     | <i>Bryonia alba</i>         | EU096333 |
| Eudicotyledons | Cucurbitaceae | <i>Bryonia</i>     | <i>Bryonia alba</i>         | EU096334 |
| Eudicotyledons | Cucurbitaceae | <i>Bryonia</i>     | <i>Bryonia alba</i>         | EU096335 |
| Eudicotyledons | Cucurbitaceae | <i>Bryonia</i>     | <i>Bryonia alba</i>         | EU096336 |

|                |               |                     |                                     |          |
|----------------|---------------|---------------------|-------------------------------------|----------|
| Eudicotyledons | Cucurbitaceae | <i>Bryonia</i>      | <i>Bryonia alba</i>                 | EU096337 |
| Eudicotyledons | Cucurbitaceae | <i>Bryonia</i>      | <i>Bryonia alba</i>                 | EU096338 |
| Eudicotyledons | Cucurbitaceae | <i>Bryonia</i>      | <i>Bryonia alba</i>                 | EU096339 |
| Eudicotyledons | Amaranthaceae | <i>Chenopodium</i>  | <i>Chenopodium glaucum</i>          | JN044295 |
| Eudicotyledons | Amaranthaceae | <i>Chenopodium</i>  | <i>Chenopodium glaucum</i>          | JN044296 |
| Eudicotyledons | Amaranthaceae | <i>Chenopodium</i>  | <i>Chenopodium glaucum</i>          | JN044297 |
| Eudicotyledons | Amaranthaceae | <i>Chenopodium</i>  | <i>Chenopodium glaucum</i>          | JN044298 |
| Eudicotyledons | Oxalidaceae   | <i>Oxalis</i>       | <i>Oxalis namaquana</i>             | JN983505 |
| Eudicotyledons | Oxalidaceae   | <i>Oxalis</i>       | <i>Oxalis namaquana</i>             | JN983506 |
| Eudicotyledons | Oxalidaceae   | <i>Oxalis</i>       | <i>Oxalis namaquana</i>             | JN983507 |
| Eudicotyledons | Oxalidaceae   | <i>Oxalis</i>       | <i>Oxalis namaquana</i>             | JN983508 |
| Eudicotyledons | Burseraceae   | <i>Bursera</i>      | <i>Bursera brunea</i>               | AY309404 |
| Eudicotyledons | Burseraceae   | <i>Bursera</i>      | <i>Bursera brunea</i>               | AY309405 |
| Eudicotyledons | Burseraceae   | <i>Bursera</i>      | <i>Bursera brunea</i>               | AY309406 |
| Eudicotyledons | Burseraceae   | <i>Bursera</i>      | <i>Bursera gracilipes</i>           | AY309407 |
| Eudicotyledons | Burseraceae   | <i>Bursera</i>      | <i>Bursera gracilipes</i>           | AY309408 |
| Eudicotyledons | Burseraceae   | <i>Canarium</i>     | <i>Canarium pilosum</i>             | AY635378 |
| Eudicotyledons | Burseraceae   | <i>Canarium</i>     | <i>Canarium pilosum</i>             | AY831938 |
| Eudicotyledons | Rubiaceae     | <i>Oldenlandia</i>  | <i>Oldenlandia tenelliflora</i>     | JF699810 |
| Eudicotyledons | Rubiaceae     | <i>Oldenlandia</i>  | <i>Oldenlandia tenelliflora</i>     | JF699811 |
| Eudicotyledons | Rubiaceae     | <i>Oldenlandia</i>  | <i>Oldenlandia tenelliflora</i>     | JN044785 |
| Eudicotyledons | Rubiaceae     | <i>Oldenlandia</i>  | <i>Oldenlandia tenelliflora</i>     | JN044786 |
| Eudicotyledons | Rubiaceae     | <i>Oldenlandia</i>  | <i>Oldenlandia diffusa</i>          | GQ435231 |
| Eudicotyledons | Rubiaceae     | <i>Oldenlandia</i>  | <i>Oldenlandia diffusa</i>          | JF699788 |
| Eudicotyledons | Rubiaceae     | <i>Oldenlandia</i>  | <i>Oldenlandia diffusa</i>          | JF699789 |
| Eudicotyledons | Asteraceae    | <i>Ligularia</i>    | <i>Ligularia tongolensis</i>        | JN045209 |
| Eudicotyledons | Asteraceae    | <i>Ligularia</i>    | <i>Ligularia tongolensis</i>        | JN045210 |
| Eudicotyledons | Asteraceae    | <i>Ligularia</i>    | <i>Ligularia tongolensis</i>        | JN045211 |
| Eudicotyledons | Asteraceae    | <i>Ligularia</i>    | <i>Ligularia tongolensis</i>        | JN045212 |
| Eudicotyledons | Asteraceae    | <i>Arctotis</i>     | <i>Arctotis bellidifolia</i>        | EU846421 |
| Eudicotyledons | Asteraceae    | <i>Arctotis</i>     | <i>Arctotis bellidifolia</i>        | EU846422 |
| Eudicotyledons | Rosaceae      | <i>Prunus</i>       | <i>Prunus pensylvanica</i>          | HQ596802 |
| Eudicotyledons | Rosaceae      | <i>Prunus</i>       | <i>Prunus pensylvanica</i>          | AY500632 |
| Eudicotyledons | Asteraceae    | <i>Ligularia</i>    | <i>Ligularia nelumbifolia</i>       | JN045199 |
| Eudicotyledons | Asteraceae    | <i>Ligularia</i>    | <i>Ligularia nelumbifolia</i>       | JN045200 |
| Eudicotyledons | Asteraceae    | <i>Ligularia</i>    | <i>Ligularia pleurocaulis</i>       | JN045201 |
| Eudicotyledons | Asteraceae    | <i>Ligularia</i>    | <i>Ligularia pleurocaulis</i>       | JN045202 |
| Eudicotyledons | Asteraceae    | <i>Ligularia</i>    | <i>Ligularia subspicata</i>         | JN045203 |
| Eudicotyledons | Asteraceae    | <i>Ligularia</i>    | <i>Ligularia subspicata</i>         | JN045204 |
| Eudicotyledons | Asteraceae    | <i>Ligularia</i>    | <i>Ligularia subspicata</i>         | JN045205 |
| Eudicotyledons | Asteraceae    | <i>Ligularia</i>    | <i>Ligularia subspicata</i>         | JN045206 |
| Eudicotyledons | Asteraceae    | <i>Ligularia</i>    | <i>Ligularia subspicata</i>         | JN045207 |
| Eudicotyledons | Asteraceae    | <i>Ligularia</i>    | <i>Ligularia subspicata</i>         | JN045208 |
| Eudicotyledons | Asteraceae    | <i>Ligularia</i>    | <i>Ligularia vellerea</i>           | JN045213 |
| Eudicotyledons | Asteraceae    | <i>Ligularia</i>    | <i>Ligularia vellerea</i>           | JN045214 |
| Eudicotyledons | Asteraceae    | <i>Ligularia</i>    | <i>Ligularia vellerea</i>           | JN045215 |
| Eudicotyledons | Ericaceae     | <i>Rhododendron</i> | <i>Rhododendron hybrid cultivar</i> | HQ707035 |
| Eudicotyledons | Ericaceae     | <i>Rhododendron</i> | <i>Rhododendron hybrid cultivar</i> | HQ707036 |
| Eudicotyledons | Brassicaceae  | <i>Capsella</i>     | <i>Capsella grandiflora</i>         | FR822352 |
| Eudicotyledons | Brassicaceae  | <i>Capsella</i>     | <i>Capsella grandiflora</i>         | FR822353 |
| Eudicotyledons | Rubiaceae     | <i>Morinda</i>      | <i>Morinda officinalis</i>          | JN045486 |
| Eudicotyledons | Rubiaceae     | <i>Morinda</i>      | <i>Morinda officinalis</i>          | JN045487 |
| Eudicotyledons | Rubiaceae     | <i>Morinda</i>      | <i>Morinda officinalis</i>          | JN045488 |

|                |                |                    |                               |          |
|----------------|----------------|--------------------|-------------------------------|----------|
| Eudicotyledons | Rosaceae       | <i>Rosa</i>        | <i>Rosa palustris</i>         | DQ778798 |
| Eudicotyledons | Rosaceae       | <i>Rosa</i>        | <i>Rosa palustris</i>         | HQ596823 |
| Eudicotyledons | Rosaceae       | <i>Rosa</i>        | <i>Rosa xanthina</i>          | DQ778816 |
| Eudicotyledons | Rosaceae       | <i>Rosa</i>        | <i>Rosa xanthina</i>          | DQ778817 |
| Eudicotyledons | Solanaceae     | <i>Solanum</i>     | <i>Solanum aculeatissimum</i> | JN047208 |
| Eudicotyledons | Solanaceae     | <i>Solanum</i>     | <i>Solanum aculeatissimum</i> | JN047209 |
| Eudicotyledons | Solanaceae     | <i>Solanum</i>     | <i>Solanum aculeatissimum</i> | JN047210 |
| Eudicotyledons | Solanaceae     | <i>Solanum</i>     | <i>Solanum aculeatissimum</i> | JN047211 |
| Eudicotyledons | Solanaceae     | <i>Solanum</i>     | <i>Solanum aculeatissimum</i> | JN047212 |
| Eudicotyledons | Convolvulaceae | <i>Convolvulus</i> | <i>Convolvulus floridus</i>   | EF375896 |
| Eudicotyledons | Convolvulaceae | <i>Convolvulus</i> | <i>Convolvulus floridus</i>   | EF375897 |
| Eudicotyledons | Convolvulaceae | <i>Convolvulus</i> | <i>Convolvulus floridus</i>   | EF375898 |
| Eudicotyledons | Convolvulaceae | <i>Convolvulus</i> | <i>Convolvulus floridus</i>   | EF375899 |
| Eudicotyledons | Convolvulaceae | <i>Convolvulus</i> | <i>Convolvulus floridus</i>   | EF375900 |
| Eudicotyledons | Convolvulaceae | <i>Convolvulus</i> | <i>Convolvulus floridus</i>   | EF375901 |
| Eudicotyledons | Convolvulaceae | <i>Convolvulus</i> | <i>Convolvulus floridus</i>   | EF375902 |
| Eudicotyledons | Convolvulaceae | <i>Convolvulus</i> | <i>Convolvulus floridus</i>   | EF375903 |
| Eudicotyledons | Convolvulaceae | <i>Convolvulus</i> | <i>Convolvulus floridus</i>   | EF375904 |
| Eudicotyledons | Convolvulaceae | <i>Convolvulus</i> | <i>Convolvulus floridus</i>   | EF375905 |
| Eudicotyledons | Convolvulaceae | <i>Convolvulus</i> | <i>Convolvulus floridus</i>   | EF375906 |
| Eudicotyledons | Convolvulaceae | <i>Convolvulus</i> | <i>Convolvulus floridus</i>   | EF375907 |
| Eudicotyledons | Convolvulaceae | <i>Convolvulus</i> | <i>Convolvulus floridus</i>   | EF375908 |
| Eudicotyledons | Convolvulaceae | <i>Convolvulus</i> | <i>Convolvulus floridus</i>   | EF375909 |
| Eudicotyledons | Convolvulaceae | <i>Convolvulus</i> | <i>Convolvulus floridus</i>   | EF375910 |
| Eudicotyledons | Convolvulaceae | <i>Convolvulus</i> | <i>Convolvulus floridus</i>   | EF375911 |
| Eudicotyledons | Convolvulaceae | <i>Convolvulus</i> | <i>Convolvulus floridus</i>   | EF375912 |
| Eudicotyledons | Convolvulaceae | <i>Convolvulus</i> | <i>Convolvulus floridus</i>   | EF375913 |
| Eudicotyledons | Convolvulaceae | <i>Convolvulus</i> | <i>Convolvulus floridus</i>   | EF375914 |
| Eudicotyledons | Convolvulaceae | <i>Convolvulus</i> | <i>Convolvulus scoparius</i>  | EF375915 |
| Eudicotyledons | Convolvulaceae | <i>Convolvulus</i> | <i>Convolvulus scoparius</i>  | EF375916 |
| Eudicotyledons | Convolvulaceae | <i>Convolvulus</i> | <i>Convolvulus scoparius</i>  | EF375917 |
| Eudicotyledons | Convolvulaceae | <i>Convolvulus</i> | <i>Convolvulus scoparius</i>  | EF375918 |
| Eudicotyledons | Convolvulaceae | <i>Convolvulus</i> | <i>Convolvulus scoparius</i>  | EF375919 |
| Eudicotyledons | Convolvulaceae | <i>Convolvulus</i> | <i>Convolvulus scoparius</i>  | EF375920 |
| Eudicotyledons | Convolvulaceae | <i>Convolvulus</i> | <i>Convolvulus scoparius</i>  | EF375921 |
| Eudicotyledons | Convolvulaceae | <i>Convolvulus</i> | <i>Convolvulus scoparius</i>  | EF375922 |
| Eudicotyledons | Convolvulaceae | <i>Convolvulus</i> | <i>Convolvulus scoparius</i>  | EF375923 |
| Eudicotyledons | Convolvulaceae | <i>Convolvulus</i> | <i>Convolvulus scoparius</i>  | EF375924 |
| Eudicotyledons | Convolvulaceae | <i>Convolvulus</i> | <i>Convolvulus scoparius</i>  | EF375925 |
| Eudicotyledons | Convolvulaceae | <i>Convolvulus</i> | <i>Convolvulus scoparius</i>  | EF375926 |
| Eudicotyledons | Convolvulaceae | <i>Convolvulus</i> | <i>Convolvulus scoparius</i>  | EF375927 |
| Eudicotyledons | Convolvulaceae | <i>Convolvulus</i> | <i>Convolvulus scoparius</i>  | EF375928 |
| Eudicotyledons | Convolvulaceae | <i>Convolvulus</i> | <i>Convolvulus scoparius</i>  | EF375929 |
| Eudicotyledons | Asteraceae     | <i>Ligularia</i>   | <i>Ligularia lankongensis</i> | JN045197 |
| Eudicotyledons | Asteraceae     | <i>Ligularia</i>   | <i>Ligularia lankongensis</i> | JN045198 |
| Eudicotyledons | Rubiaceae      | <i>Morinda</i>     | <i>Morinda umbellata</i>      | JN045492 |
| Eudicotyledons | Rubiaceae      | <i>Morinda</i>     | <i>Morinda umbellata</i>      | JN045493 |
| Eudicotyledons | Rubiaceae      | <i>Morinda</i>     | <i>Morinda umbellata</i>      | JN045494 |
| Eudicotyledons | Rubiaceae      | <i>Morinda</i>     | <i>Morinda umbellata</i>      | JN045495 |
| Eudicotyledons | Rubiaceae      | <i>Morinda</i>     | <i>Morinda umbellata</i>      | JN045496 |
| Eudicotyledons | Lamiaceae      | <i>Origanum</i>    | <i>Origanum majorana</i>      | FR726122 |
| Eudicotyledons | Lamiaceae      | <i>Origanum</i>    | <i>Origanum majorana</i>      | FR726123 |
| Eudicotyledons | Lamiaceae      | <i>Origanum</i>    | <i>Origanum majorana</i>      | FR726124 |

|                |                 |                      |                                  |          |
|----------------|-----------------|----------------------|----------------------------------|----------|
| Eudicotyledons | Lamiaceae       | <i>Origanum</i>      | <i>Origanum majorana</i>         | FR726125 |
| Eudicotyledons | Lamiaceae       | <i>Origanum</i>      | <i>Origanum majorana</i>         | HQ902835 |
| Eudicotyledons | Sapotaceae      | <i>Manilkara</i>     | <i>Manilkara huberi</i>          | FJ039060 |
| Eudicotyledons | Sapotaceae      | <i>Manilkara</i>     | <i>Manilkara huberi</i>          | FJ039061 |
| Eudicotyledons | Sapotaceae      | <i>Manilkara</i>     | <i>Manilkara huberi</i>          | AM179733 |
| Eudicotyledons | Rubiaceae       | <i>Mussaenda</i>     | <i>Mussaenda pubescens</i>       | JN045520 |
| Eudicotyledons | Rubiaceae       | <i>Mussaenda</i>     | <i>Mussaenda pubescens</i>       | JN045521 |
| Eudicotyledons | Rubiaceae       | <i>Mussaenda</i>     | <i>Mussaenda pubescens</i>       | JN045522 |
| Eudicotyledons | Rubiaceae       | <i>Mussaenda</i>     | <i>Mussaenda pubescens</i>       | JN045523 |
| Eudicotyledons | Rubiaceae       | <i>Mussaenda</i>     | <i>Mussaenda pubescens</i>       | JN045524 |
| Eudicotyledons | Rubiaceae       | <i>Mussaenda</i>     | <i>Mussaenda pubescens</i>       | JN045525 |
| Eudicotyledons | Rubiaceae       | <i>Mussaenda</i>     | <i>Mussaenda pubescens</i>       | JN045526 |
| Eudicotyledons | Rubiaceae       | <i>Mussaenda</i>     | <i>Mussaenda pubescens</i>       | JN045527 |
| Eudicotyledons | Caryophyllaceae | <i>Cerastium</i>     | <i>Cerastium eriophorum</i>      | AY521416 |
| Eudicotyledons | Caryophyllaceae | <i>Cerastium</i>     | <i>Cerastium eriophorum</i>      | AY521438 |
| Eudicotyledons | Cucurbitaceae   | <i>Trichosanthes</i> | <i>Trichosanthes lepiniana</i>   | HQ829555 |
| Eudicotyledons | Cucurbitaceae   | <i>Trichosanthes</i> | <i>Trichosanthes lepiniana</i>   | HQ829556 |
| Eudicotyledons | Rosaceae        | <i>Malus</i>         | <i>Malus pumila</i>              | JQ390737 |
| Eudicotyledons | Rosaceae        | <i>Malus</i>         | <i>Malus pumila</i>              | GU562389 |
| Eudicotyledons | Rosaceae        | <i>Malus</i>         | <i>Malus pumila</i>              | HQ596764 |
| Eudicotyledons | Salicaceae      | <i>Salix</i>         | <i>Salix eriocephala</i>         | EU750540 |
| Eudicotyledons | Salicaceae      | <i>Salix</i>         | <i>Salix eriocephala</i>         | EU750541 |
| Eudicotyledons | Salicaceae      | <i>Salix</i>         | <i>Salix eriocephala</i>         | EU750542 |
| Eudicotyledons | Salicaceae      | <i>Salix</i>         | <i>Salix eriocephala</i>         | EU750543 |
| Eudicotyledons | Caryophyllaceae | <i>Dianthus</i>      | <i>Dianthus superbus</i>         | GU441090 |
| Eudicotyledons | Caryophyllaceae | <i>Dianthus</i>      | <i>Dianthus superbus</i>         | GU441091 |
| Eudicotyledons | Caryophyllaceae | <i>Dianthus</i>      | <i>Dianthus superbus</i>         | GQ435348 |
| Eudicotyledons | Caryophyllaceae | <i>Dianthus</i>      | <i>Dianthus sylvestris</i>       | GU441092 |
| Eudicotyledons | Caryophyllaceae | <i>Dianthus</i>      | <i>Dianthus sylvestris</i>       | GU441093 |
| Eudicotyledons | Caryophyllaceae | <i>Dianthus</i>      | <i>Dianthus sylvestris</i>       | GU441094 |
| Eudicotyledons | Aceraceae       | <i>Acer</i>          | <i>Acer grandidentatum</i>       | DQ887749 |
| Eudicotyledons | Aceraceae       | <i>Acer</i>          | <i>Acer grandidentatum</i>       | DQ978627 |
| Eudicotyledons | Plantaginaceae  | <i>Antirrhinum</i>   | <i>Antirrhinum pulverulentum</i> | HM152937 |
| Eudicotyledons | Plantaginaceae  | <i>Antirrhinum</i>   | <i>Antirrhinum pulverulentum</i> | HM152938 |
| Eudicotyledons | Plantaginaceae  | <i>Antirrhinum</i>   | <i>Antirrhinum pulverulentum</i> | HM152939 |
| Eudicotyledons | Plantaginaceae  | <i>Antirrhinum</i>   | <i>Antirrhinum pulverulentum</i> | HM152940 |
| Eudicotyledons | Plantaginaceae  | <i>Antirrhinum</i>   | <i>Antirrhinum pulverulentum</i> | HM152941 |
| Eudicotyledons | Plantaginaceae  | <i>Antirrhinum</i>   | <i>Antirrhinum pulverulentum</i> | HM152942 |
| Eudicotyledons | Plantaginaceae  | <i>Antirrhinum</i>   | <i>Antirrhinum grosii</i>        | HM152902 |
| Eudicotyledons | Plantaginaceae  | <i>Antirrhinum</i>   | <i>Antirrhinum grosii</i>        | HM152903 |
| Eudicotyledons | Plantaginaceae  | <i>Antirrhinum</i>   | <i>Antirrhinum subbaeticum</i>   | HM152950 |
| Eudicotyledons | Plantaginaceae  | <i>Antirrhinum</i>   | <i>Antirrhinum subbaeticum</i>   | HM152951 |
| Eudicotyledons | Plantaginaceae  | <i>Antirrhinum</i>   | <i>Antirrhinum subbaeticum</i>   | HM152952 |
| Eudicotyledons | Plantaginaceae  | <i>Antirrhinum</i>   | <i>Antirrhinum subbaeticum</i>   | HM152953 |
| Eudicotyledons | Burseraceae     | <i>Canarium</i>      | <i>Canarium album</i>            | HQ415434 |
| Eudicotyledons | Burseraceae     | <i>Canarium</i>      | <i>Canarium album</i>            | AY635371 |
| Eudicotyledons | Burseraceae     | <i>Bursera</i>       | <i>Bursera graveolens</i>        | GQ505924 |
| Eudicotyledons | Burseraceae     | <i>Bursera</i>       | <i>Bursera graveolens</i>        | GQ505927 |
| Eudicotyledons | Burseraceae     | <i>Bursera</i>       | <i>Bursera graveolens</i>        | GQ505928 |
| Eudicotyledons | Burseraceae     | <i>Bursera</i>       | <i>Bursera graveolens</i>        | GQ505929 |
| Eudicotyledons | Burseraceae     | <i>Bursera</i>       | <i>Bursera graveolens</i>        | GQ505930 |
| Eudicotyledons | Burseraceae     | <i>Bursera</i>       | <i>Bursera graveolens</i>        | JF919186 |
| Eudicotyledons | Burseraceae     | <i>Bursera</i>       | <i>Bursera malacophylla</i>      | GQ505925 |

|                |                |                     |                                    |          |
|----------------|----------------|---------------------|------------------------------------|----------|
| Eudicotyledons | Burseraceae    | <i>Bursera</i>      | <i>Bursera malacophylla</i>        | GQ505926 |
| Eudicotyledons | Plantaginaceae | <i>Veronica</i>     | <i>Veronica krumovii</i>           | HM370885 |
| Eudicotyledons | Plantaginaceae | <i>Veronica</i>     | <i>Veronica krumovii</i>           | HM370886 |
| Eudicotyledons | Plantaginaceae | <i>Veronica</i>     | <i>Veronica krumovii</i>           | HM370905 |
| Eudicotyledons | Plantaginaceae | <i>Veronica</i>     | <i>Veronica krumovii</i>           | HM370906 |
| Eudicotyledons | Plantaginaceae | <i>Veronica</i>     | <i>Veronica krumovii</i>           | HM370939 |
| Eudicotyledons | Plantaginaceae | <i>Veronica</i>     | <i>Veronica krumovii</i>           | HM370946 |
| Eudicotyledons | Fabaceae       | <i>Acacia</i>       | <i>Acacia brevispica</i>           | GQ872304 |
| Eudicotyledons | Fabaceae       | <i>Acacia</i>       | <i>Acacia brevispica</i>           | EU811977 |
| Eudicotyledons | Platanaceae    | <i>Platanus</i>     | <i>Platanus rzedowskii</i>         | HE661211 |
| Eudicotyledons | Platanaceae    | <i>Platanus</i>     | <i>Platanus rzedowskii</i>         | HE661212 |
| Eudicotyledons | Platanaceae    | <i>Platanus</i>     | <i>Platanus rzedowskii</i>         | HE661213 |
| Eudicotyledons | Platanaceae    | <i>Platanus</i>     | <i>Platanus rzedowskii</i>         | HE661214 |
| Eudicotyledons | Platanaceae    | <i>Platanus</i>     | <i>Platanus rzedowskii</i>         | HE661215 |
| Eudicotyledons | Platanaceae    | <i>Platanus</i>     | <i>Platanus rzedowskii</i>         | HE661216 |
| Eudicotyledons | Platanaceae    | <i>Platanus</i>     | <i>Platanus rzedowskii</i>         | HE661217 |
| Eudicotyledons | Platanaceae    | <i>Platanus</i>     | <i>Platanus wrightii</i>           | HE661226 |
| Eudicotyledons | Platanaceae    | <i>Platanus</i>     | <i>Platanus wrightii</i>           | HE661227 |
| Eudicotyledons | Platanaceae    | <i>Platanus</i>     | <i>Platanus wrightii</i>           | HE661228 |
| Eudicotyledons | Platanaceae    | <i>Platanus</i>     | <i>Platanus wrightii</i>           | HE661229 |
| Eudicotyledons | Asteraceae     | <i>Ligularia</i>    | <i>Ligularia cymbulifera</i>       | JN045182 |
| Eudicotyledons | Asteraceae     | <i>Ligularia</i>    | <i>Ligularia cymbulifera</i>       | JN045183 |
| Eudicotyledons | Asteraceae     | <i>Ligularia</i>    | <i>Ligularia cymbulifera</i>       | JN045184 |
| Eudicotyledons | Asteraceae     | <i>Ligularia</i>    | <i>Ligularia cymbulifera</i>       | JN045185 |
| Eudicotyledons | Asteraceae     | <i>Ligularia</i>    | <i>Ligularia cymbulifera</i>       | JN045186 |
| Eudicotyledons | Asteraceae     | <i>Ligularia</i>    | <i>Ligularia cymbulifera</i>       | JN045187 |
| Eudicotyledons | Asteraceae     | <i>Ligularia</i>    | <i>Ligularia cymbulifera</i>       | JN045188 |
| Eudicotyledons | Ericaceae      | <i>Rhododendron</i> | <i>Rhododendron impeditum</i>      | JN046842 |
| Eudicotyledons | Ericaceae      | <i>Rhododendron</i> | <i>Rhododendron impeditum</i>      | JN046843 |
| Eudicotyledons | Ericaceae      | <i>Rhododendron</i> | <i>Rhododendron impeditum</i>      | JN046844 |
| Eudicotyledons | Ericaceae      | <i>Rhododendron</i> | <i>Rhododendron impeditum</i>      | JN046845 |
| Eudicotyledons | Campanulaceae  | <i>Lobelia</i>      | <i>Lobelia inflata</i>             | HQ596751 |
| Eudicotyledons | Campanulaceae  | <i>Lobelia</i>      | <i>Lobelia inflata</i>             | GQ248332 |
| Eudicotyledons | Campanulaceae  | <i>Lobelia</i>      | <i>Lobelia inflata</i>             | EF590710 |
| Eudicotyledons | Solanaceae     | <i>Hyoscyamus</i>   | <i>Hyoscyamus albus</i>            | HQ216158 |
| Eudicotyledons | Solanaceae     | <i>Hyoscyamus</i>   | <i>Hyoscyamus albus</i>            | HQ216159 |
| Eudicotyledons | Ericaceae      | <i>Rhododendron</i> | <i>Rhododendron excellens</i>      | HQ706964 |
| Eudicotyledons | Ericaceae      | <i>Rhododendron</i> | <i>Rhododendron excellens</i>      | HQ706965 |
| Eudicotyledons | Ericaceae      | <i>Rhododendron</i> | <i>Rhododendron excellens</i>      | HQ706966 |
| Eudicotyledons | Ericaceae      | <i>Rhododendron</i> | <i>Rhododendron forrestii</i>      | JN046818 |
| Eudicotyledons | Ericaceae      | <i>Rhododendron</i> | <i>Rhododendron forrestii</i>      | JN046819 |
| Eudicotyledons | Ericaceae      | <i>Rhododendron</i> | <i>Rhododendron genestierianum</i> | JN046826 |
| Eudicotyledons | Ericaceae      | <i>Rhododendron</i> | <i>Rhododendron genestierianum</i> | JN046827 |
| Eudicotyledons | Ericaceae      | <i>Rhododendron</i> | <i>Rhododendron mekongense</i>     | JN046880 |
| Eudicotyledons | Ericaceae      | <i>Rhododendron</i> | <i>Rhododendron mekongense</i>     | JN046881 |
| Eudicotyledons | Ericaceae      | <i>Rhododendron</i> | <i>Rhododendron mekongense</i>     | HQ706996 |
| Eudicotyledons | Ericaceae      | <i>Rhododendron</i> | <i>Rhododendron mekongense</i>     | HQ706997 |
| Eudicotyledons | Ericaceae      | <i>Rhododendron</i> | <i>Rhododendron triflorum</i>      | JN047002 |
| Eudicotyledons | Ericaceae      | <i>Rhododendron</i> | <i>Rhododendron triflorum</i>      | JN047003 |
| Eudicotyledons | Ericaceae      | <i>Rhododendron</i> | <i>Rhododendron wardii</i>         | JN047016 |
| Eudicotyledons | Ericaceae      | <i>Rhododendron</i> | <i>Rhododendron wardii</i>         | JN047017 |
| Eudicotyledons | Ericaceae      | <i>Rhododendron</i> | <i>Rhododendron wardii</i>         | JN047018 |
| Eudicotyledons | Ericaceae      | <i>Rhododendron</i> | <i>Rhododendron wardii</i>         | JN047019 |

|                |               |                     |                                     |          |
|----------------|---------------|---------------------|-------------------------------------|----------|
| Eudicotyledons | Ericaceae     | <i>Rhododendron</i> | <i>Rhododendron wardii</i>          | JN047020 |
| Eudicotyledons | Ericaceae     | <i>Rhododendron</i> | <i>Rhododendron wardii</i>          | HQ707037 |
| Eudicotyledons | Ericaceae     | <i>Rhododendron</i> | <i>Rhododendron wardii</i>          | HQ707038 |
| Eudicotyledons | Ericaceae     | <i>Rhododendron</i> | <i>Rhododendron xanthostephanum</i> | JN047021 |
| Eudicotyledons | Ericaceae     | <i>Rhododendron</i> | <i>Rhododendron xanthostephanum</i> | JN047022 |
| Eudicotyledons | Ericaceae     | <i>Rhododendron</i> | <i>Rhododendron xanthostephanum</i> | JN047023 |
| Eudicotyledons | Ericaceae     | <i>Rhododendron</i> | <i>Rhododendron xanthostephanum</i> | JN047024 |
| Eudicotyledons | Ericaceae     | <i>Rhododendron</i> | <i>Rhododendron maddenii</i>        | JN046875 |
| Eudicotyledons | Ericaceae     | <i>Rhododendron</i> | <i>Rhododendron maddenii</i>        | JN046876 |
| Eudicotyledons | Ericaceae     | <i>Rhododendron</i> | <i>Rhododendron maddenii</i>        | JN046877 |
| Eudicotyledons | Ericaceae     | <i>Rhododendron</i> | <i>Rhododendron auriculatum</i>     | HQ706955 |
| Eudicotyledons | Ericaceae     | <i>Rhododendron</i> | <i>Rhododendron auriculatum</i>     | HQ706956 |
| Eudicotyledons | Ericaceae     | <i>Rhododendron</i> | <i>Rhododendron delavayi</i>        | JN046793 |
| Eudicotyledons | Ericaceae     | <i>Rhododendron</i> | <i>Rhododendron delavayi</i>        | JN046794 |
| Eudicotyledons | Ericaceae     | <i>Rhododendron</i> | <i>Rhododendron delavayi</i>        | JN046795 |
| Eudicotyledons | Ericaceae     | <i>Rhododendron</i> | <i>Rhododendron delavayi</i>        | JN046796 |
| Eudicotyledons | Ericaceae     | <i>Rhododendron</i> | <i>Rhododendron delavayi</i>        | JN046797 |
| Eudicotyledons | Ericaceae     | <i>Rhododendron</i> | <i>Rhododendron delavayi</i>        | HM636525 |
| Eudicotyledons | Ericaceae     | <i>Rhododendron</i> | <i>Rhododendron delavayi</i>        | HQ706960 |
| Eudicotyledons | Ericaceae     | <i>Rhododendron</i> | <i>Rhododendron delavayi</i>        | HQ706961 |
| Eudicotyledons | Ericaceae     | <i>Rhododendron</i> | <i>Rhododendron jingangshanicum</i> | HQ706989 |
| Eudicotyledons | Ericaceae     | <i>Rhododendron</i> | <i>Rhododendron jingangshanicum</i> | HQ706990 |
| Eudicotyledons | Ericaceae     | <i>Rhododendron</i> | <i>Rhododendron irroratum</i>       | JN046846 |
| Eudicotyledons | Ericaceae     | <i>Rhododendron</i> | <i>Rhododendron irroratum</i>       | JN046847 |
| Eudicotyledons | Ericaceae     | <i>Rhododendron</i> | <i>Rhododendron irroratum</i>       | JN046848 |
| Eudicotyledons | Ericaceae     | <i>Rhododendron</i> | <i>Rhododendron irroratum</i>       | JN046849 |
| Eudicotyledons | Ericaceae     | <i>Rhododendron</i> | <i>Rhododendron irroratum</i>       | HQ706986 |
| Eudicotyledons | Ericaceae     | <i>Rhododendron</i> | <i>Rhododendron irroratum</i>       | HQ706987 |
| Eudicotyledons | Ericaceae     | <i>Rhododendron</i> | <i>Rhododendron irroratum</i>       | HQ706988 |
| Eudicotyledons | Ericaceae     | <i>Rhododendron</i> | <i>Rhododendron annae</i>           | HQ706951 |
| Eudicotyledons | Ericaceae     | <i>Rhododendron</i> | <i>Rhododendron annae</i>           | HQ706952 |
| Eudicotyledons | Ericaceae     | <i>Rhododendron</i> | <i>Rhododendron annae</i>           | HQ706953 |
| Eudicotyledons | Orobanchaceae | <i>Pedicularis</i>  | <i>Pedicularis kansuensis</i>       | JN046008 |
| Eudicotyledons | Orobanchaceae | <i>Pedicularis</i>  | <i>Pedicularis kansuensis</i>       | JN046009 |
| Eudicotyledons | Orobanchaceae | <i>Pedicularis</i>  | <i>Pedicularis kansuensis</i>       | JN046010 |
| Eudicotyledons | Orobanchaceae | <i>Pedicularis</i>  | <i>Pedicularis kansuensis</i>       | JN046011 |
| Eudicotyledons | Orobanchaceae | <i>Pedicularis</i>  | <i>Pedicularis kansuensis</i>       | JN046012 |
| Eudicotyledons | Orobanchaceae | <i>Pedicularis</i>  | <i>Pedicularis rex</i>              | JN046094 |
| Eudicotyledons | Orobanchaceae | <i>Pedicularis</i>  | <i>Pedicularis rex</i>              | JN046095 |
| Eudicotyledons | Orobanchaceae | <i>Pedicularis</i>  | <i>Pedicularis rex</i>              | JN046096 |
| Eudicotyledons | Orobanchaceae | <i>Pedicularis</i>  | <i>Pedicularis rex</i>              | JN046097 |
| Eudicotyledons | Orobanchaceae | <i>Pedicularis</i>  | <i>Pedicularis rex</i>              | JN046098 |
| Eudicotyledons | Orobanchaceae | <i>Pedicularis</i>  | <i>Pedicularis salviiflora</i>      | JN046129 |
| Eudicotyledons | Orobanchaceae | <i>Pedicularis</i>  | <i>Pedicularis salviiflora</i>      | JN046130 |
| Eudicotyledons | Orobanchaceae | <i>Pedicularis</i>  | <i>Pedicularis salviiflora</i>      | JN046131 |
| Eudicotyledons | Solanaceae    | <i>Petunia</i>      | <i>Petunia altiplana</i>            | DQ791909 |
| Eudicotyledons | Solanaceae    | <i>Petunia</i>      | <i>Petunia altiplana</i>            | DQ791910 |
| Eudicotyledons | Solanaceae    | <i>Petunia</i>      | <i>Petunia altiplana</i>            | DQ791911 |
| Eudicotyledons | Solanaceae    | <i>Petunia</i>      | <i>Petunia altiplana</i>            | DQ791912 |
| Eudicotyledons | Solanaceae    | <i>Petunia</i>      | <i>Petunia altiplana</i>            | DQ791913 |
| Eudicotyledons | Solanaceae    | <i>Petunia</i>      | <i>Petunia altiplana</i>            | DQ791914 |
| Eudicotyledons | Solanaceae    | <i>Petunia</i>      | <i>Petunia altiplana</i>            | DQ791915 |
| Eudicotyledons | Solanaceae    | <i>Petunia</i>      | <i>Petunia altiplana</i>            | DQ791916 |

















|                |               |                    |                                 |          |
|----------------|---------------|--------------------|---------------------------------|----------|
| Eudicotyledons | Celastraceae  | <i>Parnassia</i>   | <i>Parnassia tenella</i>        | JN045853 |
| Eudicotyledons | Celastraceae  | <i>Parnassia</i>   | <i>Parnassia tenella</i>        | JN045854 |
| Eudicotyledons | Celastraceae  | <i>Parnassia</i>   | <i>Parnassia trinervis</i>      | JF802376 |
| Eudicotyledons | Celastraceae  | <i>Parnassia</i>   | <i>Parnassia trinervis</i>      | JF802377 |
| Eudicotyledons | Celastraceae  | <i>Parnassia</i>   | <i>Parnassia trinervis</i>      | JF802378 |
| Eudicotyledons | Celastraceae  | <i>Parnassia</i>   | <i>Parnassia trinervis</i>      | JF802379 |
| Eudicotyledons | Celastraceae  | <i>Parnassia</i>   | <i>Parnassia trinervis</i>      | JF802380 |
| Eudicotyledons | Celastraceae  | <i>Parnassia</i>   | <i>Parnassia trinervis</i>      | JN045855 |
| Eudicotyledons | Celastraceae  | <i>Parnassia</i>   | <i>Parnassia trinervis</i>      | JN045856 |
| Eudicotyledons | Celastraceae  | <i>Parnassia</i>   | <i>Parnassia trinervis</i>      | JN045857 |
| Eudicotyledons | Celastraceae  | <i>Parnassia</i>   | <i>Parnassia trinervis</i>      | JN045858 |
| Eudicotyledons | Celastraceae  | <i>Parnassia</i>   | <i>Parnassia trinervis</i>      | JN045859 |
| Eudicotyledons | Celastraceae  | <i>Parnassia</i>   | <i>Parnassia trinervis</i>      | JN045860 |
| Eudicotyledons | Celastraceae  | <i>Parnassia</i>   | <i>Parnassia trinervis</i>      | JN045861 |
| Eudicotyledons | Orobanchaceae | <i>Pedicularis</i> | <i>Pedicularis alaschanica</i>  | JN045877 |
| Eudicotyledons | Orobanchaceae | <i>Pedicularis</i> | <i>Pedicularis alaschanica</i>  | JN045878 |
| Eudicotyledons | Orobanchaceae | <i>Pedicularis</i> | <i>Pedicularis alaschanica</i>  | JN045879 |
| Eudicotyledons | Orobanchaceae | <i>Pedicularis</i> | <i>Pedicularis cranolopha</i>   | JN045922 |
| Eudicotyledons | Orobanchaceae | <i>Pedicularis</i> | <i>Pedicularis cranolopha</i>   | JN045923 |
| Eudicotyledons | Orobanchaceae | <i>Pedicularis</i> | <i>Pedicularis cranolopha</i>   | JN045924 |
| Eudicotyledons | Orobanchaceae | <i>Pedicularis</i> | <i>Pedicularis cranolopha</i>   | JN045925 |
| Eudicotyledons | Orobanchaceae | <i>Pedicularis</i> | <i>Pedicularis cranolopha</i>   | JN045926 |
| Eudicotyledons | Orobanchaceae | <i>Pedicularis</i> | <i>Pedicularis cranolopha</i>   | JN045927 |
| Eudicotyledons | Orobanchaceae | <i>Pedicularis</i> | <i>Pedicularis cranolopha</i>   | JN045928 |
| Eudicotyledons | Orobanchaceae | <i>Pedicularis</i> | <i>Pedicularis davidii</i>      | JN045947 |
| Eudicotyledons | Orobanchaceae | <i>Pedicularis</i> | <i>Pedicularis davidii</i>      | JN045948 |
| Eudicotyledons | Orobanchaceae | <i>Pedicularis</i> | <i>Pedicularis davidii</i>      | JN045949 |
| Eudicotyledons | Orobanchaceae | <i>Pedicularis</i> | <i>Pedicularis decorissima</i>  | JN045955 |
| Eudicotyledons | Orobanchaceae | <i>Pedicularis</i> | <i>Pedicularis decorissima</i>  | JN045956 |
| Eudicotyledons | Orobanchaceae | <i>Pedicularis</i> | <i>Pedicularis dolichocymba</i> | JN045970 |
| Eudicotyledons | Orobanchaceae | <i>Pedicularis</i> | <i>Pedicularis dolichocymba</i> | JN045971 |
| Eudicotyledons | Orobanchaceae | <i>Pedicularis</i> | <i>Pedicularis ehwesii</i>      | JN045975 |
| Eudicotyledons | Orobanchaceae | <i>Pedicularis</i> | <i>Pedicularis ehwesii</i>      | JN045976 |
| Eudicotyledons | Orobanchaceae | <i>Pedicularis</i> | <i>Pedicularis ehwesii</i>      | JN045977 |
| Eudicotyledons | Orobanchaceae | <i>Pedicularis</i> | <i>Pedicularis ehwesii</i>      | JN045978 |
| Eudicotyledons | Orobanchaceae | <i>Pedicularis</i> | <i>Pedicularis gracilis</i>     | JN045988 |
| Eudicotyledons | Orobanchaceae | <i>Pedicularis</i> | <i>Pedicularis gracilis</i>     | JN045989 |
| Eudicotyledons | Orobanchaceae | <i>Pedicularis</i> | <i>Pedicularis gracilis</i>     | JN045990 |
| Eudicotyledons | Orobanchaceae | <i>Pedicularis</i> | <i>Pedicularis gracilis</i>     | JN045991 |
| Eudicotyledons | Orobanchaceae | <i>Pedicularis</i> | <i>Pedicularis lyrata</i>       | JN046045 |
| Eudicotyledons | Orobanchaceae | <i>Pedicularis</i> | <i>Pedicularis lyrata</i>       | JN046046 |
| Eudicotyledons | Orobanchaceae | <i>Pedicularis</i> | <i>Pedicularis lyrata</i>       | JN046047 |
| Eudicotyledons | Orobanchaceae | <i>Pedicularis</i> | <i>Pedicularis lyrata</i>       | JN046048 |
| Eudicotyledons | Orobanchaceae | <i>Pedicularis</i> | <i>Pedicularis lyrata</i>       | JN046049 |
| Eudicotyledons | Orobanchaceae | <i>Pedicularis</i> | <i>Pedicularis lyrata</i>       | JN046050 |
| Eudicotyledons | Orobanchaceae | <i>Pedicularis</i> | <i>Pedicularis lyrata</i>       | JN046051 |
| Eudicotyledons | Orobanchaceae | <i>Pedicularis</i> | <i>Pedicularis megalantha</i>   | JN046059 |
| Eudicotyledons | Orobanchaceae | <i>Pedicularis</i> | <i>Pedicularis megalantha</i>   | JN046060 |
| Eudicotyledons | Orobanchaceae | <i>Pedicularis</i> | <i>Pedicularis oederi</i>       | JN046068 |
| Eudicotyledons | Orobanchaceae | <i>Pedicularis</i> | <i>Pedicularis oederi</i>       | JN046069 |
| Eudicotyledons | Orobanchaceae | <i>Pedicularis</i> | <i>Pedicularis oederi</i>       | JN046070 |
| Eudicotyledons | Orobanchaceae | <i>Pedicularis</i> | <i>Pedicularis oederi</i>       | JN046071 |
| Eudicotyledons | Orobanchaceae | <i>Pedicularis</i> | <i>Pedicularis przewalskii</i>  | JN046080 |



|                |                 |                       |                                    |          |
|----------------|-----------------|-----------------------|------------------------------------|----------|
| Eudicotyledons | Orobanchaceae   | <i>Pedicularis</i>    | <i>Pedicularis przewalskii</i>     | JN046081 |
| Eudicotyledons | Orobanchaceae   | <i>Pedicularis</i>    | <i>Pedicularis przewalskii</i>     | JN046082 |
| Eudicotyledons | Orobanchaceae   | <i>Pedicularis</i>    | <i>Pedicularis rhinanthoides</i>   | JN046099 |
| Eudicotyledons | Orobanchaceae   | <i>Pedicularis</i>    | <i>Pedicularis rhinanthoides</i>   | JN046100 |
| Eudicotyledons | Orobanchaceae   | <i>Pedicularis</i>    | <i>Pedicularis rhinanthoides</i>   | JN046101 |
| Eudicotyledons | Orobanchaceae   | <i>Pedicularis</i>    | <i>Pedicularis rhinanthoides</i>   | JN046102 |
| Eudicotyledons | Orobanchaceae   | <i>Pedicularis</i>    | <i>Pedicularis rhinanthoides</i>   | JN046103 |
| Eudicotyledons | Orobanchaceae   | <i>Pedicularis</i>    | <i>Pedicularis thamnophila</i>     | JN046164 |
| Eudicotyledons | Orobanchaceae   | <i>Pedicularis</i>    | <i>Pedicularis thamnophila</i>     | JN046165 |
| Eudicotyledons | Orobanchaceae   | <i>Pedicularis</i>    | <i>Pedicularis thamnophila</i>     | JN046166 |
| Eudicotyledons | Orobanchaceae   | <i>Pedicularis</i>    | <i>Pedicularis thamnophila</i>     | JN046167 |
| Eudicotyledons | Orobanchaceae   | <i>Pedicularis</i>    | <i>Pedicularis thamnophila</i>     | JN046168 |
| Eudicotyledons | Orobanchaceae   | <i>Pedicularis</i>    | <i>Pedicularis tibetica</i>        | JN046169 |
| Eudicotyledons | Orobanchaceae   | <i>Pedicularis</i>    | <i>Pedicularis tibetica</i>        | JN046170 |
| Eudicotyledons | Orobanchaceae   | <i>Pedicularis</i>    | <i>Pedicularis tibetica</i>        | JN046171 |
| Eudicotyledons | Orobanchaceae   | <i>Pedicularis</i>    | <i>Pedicularis tibetica</i>        | JN046172 |
| Eudicotyledons | Solanaceae      | <i>Solanum</i>        | <i>Solanum campylacanthum</i>      | HM016419 |
| Eudicotyledons | Solanaceae      | <i>Solanum</i>        | <i>Solanum campylacanthum</i>      | HM016420 |
| Eudicotyledons | Solanaceae      | <i>Solanum</i>        | <i>Solanum campylacanthum</i>      | HM016424 |
| Eudicotyledons | Solanaceae      | <i>Solanum</i>        | <i>Solanum linnaeanum</i>          | HM016425 |
| Eudicotyledons | Solanaceae      | <i>Solanum</i>        | <i>Solanum linnaeanum</i>          | HM016429 |
| Eudicotyledons | Solanaceae      | <i>Solanum</i>        | <i>Solanum incanum</i>             | HM016427 |
| Eudicotyledons | Solanaceae      | <i>Solanum</i>        | <i>Solanum incanum</i>             | HM016430 |
| Eudicotyledons | Solanaceae      | <i>Solanum</i>        | <i>Solanum panduriforme</i>        | HM016417 |
| Eudicotyledons | Solanaceae      | <i>Solanum</i>        | <i>Solanum panduriforme</i>        | HM016428 |
| Eudicotyledons | Solanaceae      | <i>Solanum</i>        | <i>Solanum panduriforme</i>        | EU213851 |
| Eudicotyledons | Solanaceae      | <i>Solanum</i>        | <i>Solanum panduriforme</i>        | EU213852 |
| Eudicotyledons | Solanaceae      | <i>Solanum</i>        | <i>Solanum panduriforme</i>        | EU213853 |
| Eudicotyledons | Rosaceae        | <i>Prunus</i>         | <i>Prunus kansuensis</i>           | JN046630 |
| Eudicotyledons | Rosaceae        | <i>Prunus</i>         | <i>Prunus kansuensis</i>           | JN046631 |
| Eudicotyledons | Rosaceae        | <i>Prunus</i>         | <i>Prunus kansuensis</i>           | JN046632 |
| Eudicotyledons | Rosaceae        | <i>Prunus</i>         | <i>Prunus kansuensis</i>           | JN046633 |
| Eudicotyledons | Rosaceae        | <i>Prunus</i>         | <i>Prunus kansuensis</i>           | JN046634 |
| Eudicotyledons | Campanulaceae   | <i>Lobelia</i>        | <i>Lobelia siphilitica</i>         | HQ596752 |
| Eudicotyledons | Campanulaceae   | <i>Lobelia</i>        | <i>Lobelia siphilitica</i>         | DQ006198 |
| Eudicotyledons | Caryophyllaceae | <i>Silene</i>         | <i>Silene patula</i>               | FJ890524 |
| Eudicotyledons | Caryophyllaceae | <i>Silene</i>         | <i>Silene patula</i>               | FJ890525 |
| Eudicotyledons | Caryophyllaceae | <i>Silene</i>         | <i>Silene patula</i>               | FJ890526 |
| Eudicotyledons | Caryophyllaceae | <i>Silene</i>         | <i>Silene patula</i>               | FJ890527 |
| Eudicotyledons | Caryophyllaceae | <i>Silene</i>         | <i>Silene patula</i>               | FJ890528 |
| Eudicotyledons | Caryophyllaceae | <i>Silene</i>         | <i>Silene patula</i>               | FJ890529 |
| Eudicotyledons | Caryophyllaceae | <i>Silene</i>         | <i>Silene patula</i>               | FJ890530 |
| Eudicotyledons | Plantaginaceae  | <i>Antirrhinum</i>    | <i>Antirrhinum pertegasii</i>      | HM152935 |
| Eudicotyledons | Plantaginaceae  | <i>Antirrhinum</i>    | <i>Antirrhinum pertegasii</i>      | HM152936 |
| Eudicotyledons | Ericaceae       | <i>Rhododendron</i>   | <i>Rhododendron decorum</i>        | JN046786 |
| Eudicotyledons | Ericaceae       | <i>Rhododendron</i>   | <i>Rhododendron decorum</i>        | JN046787 |
| Eudicotyledons | Ericaceae       | <i>Rhododendron</i>   | <i>Rhododendron decorum</i>        | JN046788 |
| Eudicotyledons | Ericaceae       | <i>Rhododendron</i>   | <i>Rhododendron decorum</i>        | JN046789 |
| Eudicotyledons | Ericaceae       | <i>Rhododendron</i>   | <i>Rhododendron decorum</i>        | JN046790 |
| Eudicotyledons | Ericaceae       | <i>Rhododendron</i>   | <i>Rhododendron decorum</i>        | JN046791 |
| Eudicotyledons | Ericaceae       | <i>Rhododendron</i>   | <i>Rhododendron decorum</i>        | JN046792 |
| Eudicotyledons | Ericaceae       | <i>Rhododendron</i>   | <i>Rhododendron decorum</i>        | HQ706959 |
| Eudicotyledons | Vitaceae        | <i>Parthenocissus</i> | <i>Parthenocissus tricuspidata</i> | HQ108339 |

|                |              |                       |                                    |          |
|----------------|--------------|-----------------------|------------------------------------|----------|
| Eudicotyledons | Vitaceae     | <i>Parthenocissus</i> | <i>Parthenocissus tricuspidata</i> | HQ656486 |
| Eudicotyledons | Vitaceae     | <i>Parthenocissus</i> | <i>Parthenocissus tricuspidata</i> | JF437135 |
| Eudicotyledons | Vitaceae     | <i>Vitis</i>          | <i>Vitis betulifolia</i>           | HQ108311 |
| Eudicotyledons | Vitaceae     | <i>Vitis</i>          | <i>Vitis betulifolia</i>           | HQ656451 |
| Eudicotyledons | Vitaceae     | <i>Vitis</i>          | <i>Vitis betulifolia</i>           | HQ656462 |
| Eudicotyledons | Vitaceae     | <i>Vitis</i>          | <i>Vitis betulifolia</i>           | JF437157 |
| Eudicotyledons | Vitaceae     | <i>Vitis</i>          | <i>Vitis heyneana</i>              | JN802332 |
| Eudicotyledons | Vitaceae     | <i>Vitis</i>          | <i>Vitis heyneana</i>              | HQ656457 |
| Eudicotyledons | Vitaceae     | <i>Vitis</i>          | <i>Vitis heyneana</i>              | HQ656464 |
| Eudicotyledons | Vitaceae     | <i>Vitis</i>          | <i>Vitis heyneana</i>              | HQ656465 |
| Eudicotyledons | Vitaceae     | <i>Vitis</i>          | <i>Vitis heyneana</i>              | JF437160 |
| Eudicotyledons | Vitaceae     | <i>Vitis</i>          | <i>Vitis heyneana</i>              | JF437161 |
| Eudicotyledons | Vitaceae     | <i>Vitis</i>          | <i>Vitis tiliifolia</i>            | HQ656479 |
| Eudicotyledons | Vitaceae     | <i>Vitis</i>          | <i>Vitis tiliifolia</i>            | JF437168 |
| Eudicotyledons | Geraniaceae  | <i>Geranium</i>       | <i>Geranium sibiricum</i>          | JN044742 |
| Eudicotyledons | Geraniaceae  | <i>Geranium</i>       | <i>Geranium sibiricum</i>          | JN044743 |
| Eudicotyledons | Linaceae     | <i>Linum</i>          | <i>Linum bienne</i>                | GQ845292 |
| Eudicotyledons | Linaceae     | <i>Linum</i>          | <i>Linum bienne</i>                | GQ845293 |
| Eudicotyledons | Linaceae     | <i>Linum</i>          | <i>Linum bienne</i>                | GQ845294 |
| Eudicotyledons | Celastraceae | <i>Euonymus</i>       | <i>Euonymus oxyphyllus</i>         | AB525283 |
| Eudicotyledons | Celastraceae | <i>Euonymus</i>       | <i>Euonymus oxyphyllus</i>         | AB525284 |
| Eudicotyledons | Celastraceae | <i>Euonymus</i>       | <i>Euonymus oxyphyllus</i>         | AB525285 |
| Eudicotyledons | Celastraceae | <i>Euonymus</i>       | <i>Euonymus oxyphyllus</i>         | AB525286 |
| Eudicotyledons | Celastraceae | <i>Euonymus</i>       | <i>Euonymus oxyphyllus</i>         | AB525287 |
| Eudicotyledons | Celastraceae | <i>Euonymus</i>       | <i>Euonymus oxyphyllus</i>         | AB525288 |
| Eudicotyledons | Celastraceae | <i>Euonymus</i>       | <i>Euonymus oxyphyllus</i>         | AB525289 |
| Eudicotyledons | Celastraceae | <i>Euonymus</i>       | <i>Euonymus oxyphyllus</i>         | AB525290 |
| Eudicotyledons | Celastraceae | <i>Euonymus</i>       | <i>Euonymus oxyphyllus</i>         | AB525291 |
| Eudicotyledons | Celastraceae | <i>Euonymus</i>       | <i>Euonymus oxyphyllus</i>         | AB525292 |
| Eudicotyledons | Celastraceae | <i>Euonymus</i>       | <i>Euonymus oxyphyllus</i>         | AB525293 |
| Eudicotyledons | Celastraceae | <i>Euonymus</i>       | <i>Euonymus oxyphyllus</i>         | AB525294 |
| Eudicotyledons | Celastraceae | <i>Euonymus</i>       | <i>Euonymus oxyphyllus</i>         | AB525295 |
| Eudicotyledons | Celastraceae | <i>Euonymus</i>       | <i>Euonymus oxyphyllus</i>         | AB525296 |
| Eudicotyledons | Celastraceae | <i>Euonymus</i>       | <i>Euonymus oxyphyllus</i>         | AB525297 |
| Eudicotyledons | Celastraceae | <i>Euonymus</i>       | <i>Euonymus oxyphyllus</i>         | AB525298 |
| Eudicotyledons | Celastraceae | <i>Euonymus</i>       | <i>Euonymus oxyphyllus</i>         | AB525299 |
| Eudicotyledons | Celastraceae | <i>Euonymus</i>       | <i>Euonymus oxyphyllus</i>         | AB525300 |
| Eudicotyledons | Celastraceae | <i>Euonymus</i>       | <i>Euonymus oxyphyllus</i>         | AB525301 |
| Eudicotyledons | Celastraceae | <i>Euonymus</i>       | <i>Euonymus oxyphyllus</i>         | AB525302 |
| Eudicotyledons | Celastraceae | <i>Euonymus</i>       | <i>Euonymus oxyphyllus</i>         | AB525303 |
| Eudicotyledons | Celastraceae | <i>Euonymus</i>       | <i>Euonymus oxyphyllus</i>         | AB525304 |
| Eudicotyledons | Celastraceae | <i>Euonymus</i>       | <i>Euonymus oxyphyllus</i>         | AB525305 |
| Eudicotyledons | Celastraceae | <i>Euonymus</i>       | <i>Euonymus oxyphyllus</i>         | AB525306 |
| Eudicotyledons | Celastraceae | <i>Euonymus</i>       | <i>Euonymus oxyphyllus</i>         | AB525307 |
| Eudicotyledons | Celastraceae | <i>Euonymus</i>       | <i>Euonymus oxyphyllus</i>         | AB525308 |
| Eudicotyledons | Celastraceae | <i>Euonymus</i>       | <i>Euonymus oxyphyllus</i>         | AB525309 |
| Eudicotyledons | Aceraceae    | <i>Acer</i>           | <i>Acer pycnanthum</i>             | DQ978623 |
| Eudicotyledons | Aceraceae    | <i>Acer</i>           | <i>Acer pycnanthum</i>             | GQ855775 |
| Eudicotyledons | Aceraceae    | <i>Acer</i>           | <i>Acer pycnanthum</i>             | GQ855776 |
| Eudicotyledons | Asteraceae   | <i>Centaurea</i>      | <i>Centaurea exarata</i>           | DQ846216 |
| Eudicotyledons | Asteraceae   | <i>Centaurea</i>      | <i>Centaurea exarata</i>           | DQ846217 |
| Eudicotyledons | Asteraceae   | <i>Centaurea</i>      | <i>Centaurea exarata</i>           | DQ846218 |
| Eudicotyledons | Asteraceae   | <i>Centaurea</i>      | <i>Centaurea exarata</i>           | DQ846228 |

|                |               |                    |                                            |          |
|----------------|---------------|--------------------|--------------------------------------------|----------|
| Eudicotyledons | Asteraceae    | <i>Centaurea</i>   | <i>Centaurea exarata</i>                   | DQ846229 |
| Eudicotyledons | Asteraceae    | <i>Centaurea</i>   | <i>Centaurea exarata</i>                   | DQ846230 |
| Eudicotyledons | Asteraceae    | <i>Centaurea</i>   | <i>Centaurea exarata</i>                   | DQ846246 |
| Eudicotyledons | Asteraceae    | <i>Centaurea</i>   | <i>Centaurea exarata</i>                   | DQ846247 |
| Eudicotyledons | Asteraceae    | <i>Centaurea</i>   | <i>Centaurea exarata</i>                   | DQ846248 |
| Eudicotyledons | Nitrariaceae  | <i>Nitraria</i>    | <i>Nitraria sphaerocarpa</i>               | JN045584 |
| Eudicotyledons | Nitrariaceae  | <i>Nitraria</i>    | <i>Nitraria sphaerocarpa</i>               | JN045585 |
| Eudicotyledons | Nitrariaceae  | <i>Nitraria</i>    | <i>Nitraria sphaerocarpa</i>               | JN045586 |
| Eudicotyledons | Nitrariaceae  | <i>Nitraria</i>    | <i>Nitraria sibirica</i>                   | JN045581 |
| Eudicotyledons | Nitrariaceae  | <i>Nitraria</i>    | <i>Nitraria sibirica</i>                   | JN045582 |
| Eudicotyledons | Nitrariaceae  | <i>Nitraria</i>    | <i>Nitraria sibirica</i>                   | JN045583 |
| Eudicotyledons | Nitrariaceae  | <i>Nitraria</i>    | <i>Nitraria roborowskii</i>                | JN045579 |
| Eudicotyledons | Nitrariaceae  | <i>Nitraria</i>    | <i>Nitraria roborowskii</i>                | JN045580 |
| Eudicotyledons | Asteraceae    | <i>Ligularia</i>   | <i>Ligularia hookeri</i>                   | JN045192 |
| Eudicotyledons | Asteraceae    | <i>Ligularia</i>   | <i>Ligularia hookeri</i>                   | JN045193 |
| Eudicotyledons | Apiaceae      | <i>Heracleum</i>   | <i>Heracleum antasiaticum</i>              | EU594936 |
| Eudicotyledons | Apiaceae      | <i>Heracleum</i>   | <i>Heracleum antasiaticum</i>              | EU594937 |
| Eudicotyledons | Apiaceae      | <i>Heracleum</i>   | <i>Heracleum antasiaticum</i>              | EU594938 |
| Eudicotyledons | Solanaceae    | <i>Petunia</i>     | <i>Petunia axillaris x Petunia exserta</i> | DQ225711 |
| Eudicotyledons | Solanaceae    | <i>Petunia</i>     | <i>Petunia axillaris x Petunia exserta</i> | DQ225712 |
| Eudicotyledons | Solanaceae    | <i>Petunia</i>     | <i>Petunia axillaris x Petunia exserta</i> | DQ225713 |
| Eudicotyledons | Solanaceae    | <i>Petunia</i>     | <i>Petunia axillaris x Petunia exserta</i> | DQ225714 |
| Eudicotyledons | Solanaceae    | <i>Petunia</i>     | <i>Petunia axillaris x Petunia exserta</i> | DQ225715 |
| Eudicotyledons | Solanaceae    | <i>Petunia</i>     | <i>Petunia axillaris x Petunia exserta</i> | DQ225716 |
| Eudicotyledons | Solanaceae    | <i>Petunia</i>     | <i>Petunia axillaris x Petunia exserta</i> | DQ225717 |
| Eudicotyledons | Solanaceae    | <i>Petunia</i>     | <i>Petunia axillaris x Petunia exserta</i> | DQ225718 |
| Eudicotyledons | Solanaceae    | <i>Petunia</i>     | <i>Petunia axillaris x Petunia exserta</i> | DQ225719 |
| Eudicotyledons | Solanaceae    | <i>Petunia</i>     | <i>Petunia axillaris x Petunia exserta</i> | DQ225720 |
| Eudicotyledons | Solanaceae    | <i>Petunia</i>     | <i>Petunia axillaris x Petunia exserta</i> | DQ225721 |
| Eudicotyledons | Solanaceae    | <i>Petunia</i>     | <i>Petunia axillaris x Petunia exserta</i> | DQ225722 |
| Eudicotyledons | Solanaceae    | <i>Petunia</i>     | <i>Petunia axillaris x Petunia exserta</i> | DQ225723 |
| Eudicotyledons | Solanaceae    | <i>Petunia</i>     | <i>Petunia axillaris x Petunia exserta</i> | DQ225724 |
| Eudicotyledons | Solanaceae    | <i>Petunia</i>     | <i>Petunia axillaris x Petunia exserta</i> | DQ225725 |
| Eudicotyledons | Solanaceae    | <i>Petunia</i>     | <i>Petunia axillaris x Petunia exserta</i> | DQ225726 |
| Eudicotyledons | Solanaceae    | <i>Petunia</i>     | <i>Petunia axillaris x Petunia exserta</i> | DQ225727 |
| Eudicotyledons | Solanaceae    | <i>Petunia</i>     | <i>Petunia axillaris x Petunia exserta</i> | DQ225728 |
| Eudicotyledons | Solanaceae    | <i>Petunia</i>     | <i>Petunia axillaris x Petunia exserta</i> | DQ225729 |
| Eudicotyledons | Gentianaceae  | <i>Swertia</i>     | <i>Swertia tenuis</i>                      | JN047297 |
| Eudicotyledons | Gentianaceae  | <i>Swertia</i>     | <i>Swertia tenuis</i>                      | JN047298 |
| Eudicotyledons | Cornaceae     | <i>Cornus</i>      | <i>Cornus rugosa</i>                       | EU750450 |
| Eudicotyledons | Cornaceae     | <i>Cornus</i>      | <i>Cornus rugosa</i>                       | EU750451 |
| Eudicotyledons | Campanulaceae | <i>Lobelia</i>     | <i>Lobelia chinensis</i>                   | GQ435063 |
| Eudicotyledons | Campanulaceae | <i>Lobelia</i>     | <i>Lobelia chinensis</i>                   | JN040996 |
| Eudicotyledons | Fabaceae      | <i>Albizia</i>     | <i>Albizia lebbeck</i>                     | GU135326 |
| Eudicotyledons | Fabaceae      | <i>Albizia</i>     | <i>Albizia lebbeck</i>                     | EU811983 |
| Eudicotyledons | Myrtaceae     | <i>Myrcia</i>      | <i>Myrcia coumeta</i>                      | AM489864 |
| Eudicotyledons | Myrtaceae     | <i>Myrcia</i>      | <i>Myrcia coumeta</i>                      | GQ248348 |
| Eudicotyledons | Myrtaceae     | <i>Myrcia</i>      | <i>Myrcia fallax</i>                       | AM489865 |
| Eudicotyledons | Myrtaceae     | <i>Myrcia</i>      | <i>Myrcia fallax</i>                       | GQ248349 |
| Eudicotyledons | Myrtaceae     | <i>Myrcia</i>      | <i>Myrcia fallax</i>                       | HM446968 |
| Eudicotyledons | Asteraceae    | <i>Lychnophora</i> | <i>Lychnophora salicifolia</i>             | FJ031849 |
| Eudicotyledons | Asteraceae    | <i>Lychnophora</i> | <i>Lychnophora salicifolia</i>             | FJ031850 |
| Eudicotyledons | Asteraceae    | <i>Lychnophora</i> | <i>Lychnophora salicifolia</i>             | FJ031851 |

|                |               |                      |                                |          |
|----------------|---------------|----------------------|--------------------------------|----------|
| Eudicotyledons | Asteraceae    | <i>Lychnophora</i>   | <i>Lychnophora salicifolia</i> | FJ031852 |
| Eudicotyledons | Asteraceae    | <i>Lychnophora</i>   | <i>Lychnophora salicifolia</i> | FJ031853 |
| Eudicotyledons | Asteraceae    | <i>Lychnophora</i>   | <i>Lychnophora salicifolia</i> | FJ031854 |
| Eudicotyledons | Asteraceae    | <i>Lychnophora</i>   | <i>Lychnophora salicifolia</i> | FJ031855 |
| Eudicotyledons | Asteraceae    | <i>Lychnophora</i>   | <i>Lychnophora salicifolia</i> | FJ031856 |
| Eudicotyledons | Asteraceae    | <i>Lychnophora</i>   | <i>Lychnophora salicifolia</i> | FJ031857 |
| Eudicotyledons | Asteraceae    | <i>Lychnophora</i>   | <i>Lychnophora salicifolia</i> | FJ031858 |
| Eudicotyledons | Asteraceae    | <i>Lychnophora</i>   | <i>Lychnophora salicifolia</i> | FJ031859 |
| Eudicotyledons | Asteraceae    | <i>Lychnophora</i>   | <i>Lychnophora salicifolia</i> | FJ031860 |
| Eudicotyledons | Asteraceae    | <i>Lychnophora</i>   | <i>Lychnophora salicifolia</i> | FJ031861 |
| Eudicotyledons | Asteraceae    | <i>Lychnophora</i>   | <i>Lychnophora salicifolia</i> | FJ031862 |
| Eudicotyledons | Asteraceae    | <i>Lychnophora</i>   | <i>Lychnophora salicifolia</i> | FJ031863 |
| Eudicotyledons | Asteraceae    | <i>Lychnophora</i>   | <i>Lychnophora salicifolia</i> | FJ031864 |
| Eudicotyledons | Asteraceae    | <i>Lychnophora</i>   | <i>Lychnophora salicifolia</i> | FJ031865 |
| Eudicotyledons | Asteraceae    | <i>Lychnophora</i>   | <i>Lychnophora salicifolia</i> | FJ031866 |
| Eudicotyledons | Asteraceae    | <i>Arctotis</i>      | <i>Arctotis acaulis</i>        | DQ444765 |
| Eudicotyledons | Asteraceae    | <i>Arctotis</i>      | <i>Arctotis acaulis</i>        | EU846414 |
| Eudicotyledons | Asteraceae    | <i>Arctotis</i>      | <i>Arctotis arctotoides</i>    | DQ444766 |
| Eudicotyledons | Asteraceae    | <i>Arctotis</i>      | <i>Arctotis arctotoides</i>    | EU846405 |
| Eudicotyledons | Asteraceae    | <i>Arctotis</i>      | <i>Arctotis aspera</i>         | DQ444767 |
| Eudicotyledons | Asteraceae    | <i>Arctotis</i>      | <i>Arctotis aspera</i>         | EU846418 |
| Eudicotyledons | Asteraceae    | <i>Arctotis</i>      | <i>Arctotis dregei</i>         | DQ444769 |
| Eudicotyledons | Asteraceae    | <i>Arctotis</i>      | <i>Arctotis dregei</i>         | EU846403 |
| Eudicotyledons | Asteraceae    | <i>Arctotis</i>      | <i>Arctotis perfoliata</i>     | DQ444770 |
| Eudicotyledons | Asteraceae    | <i>Arctotis</i>      | <i>Arctotis perfoliata</i>     | EU846411 |
| Eudicotyledons | Asteraceae    | <i>Haplocarpha</i>   | <i>Haplocarpha nervosa</i>     | DQ444778 |
| Eudicotyledons | Asteraceae    | <i>Haplocarpha</i>   | <i>Haplocarpha nervosa</i>     | EU846394 |
| Eudicotyledons | Asteraceae    | <i>Haplocarpha</i>   | <i>Haplocarpha rueppellii</i>  | DQ444779 |
| Eudicotyledons | Asteraceae    | <i>Haplocarpha</i>   | <i>Haplocarpha rueppellii</i>  | EU846395 |
| Eudicotyledons | Asteraceae    | <i>Haplocarpha</i>   | <i>Haplocarpha schimperi</i>   | DQ444781 |
| Eudicotyledons | Asteraceae    | <i>Haplocarpha</i>   | <i>Haplocarpha schimperi</i>   | EU846397 |
| Eudicotyledons | Apiaceae      | <i>Heracleum</i>     | <i>Heracleum dissectum</i>     | EF042117 |
| Eudicotyledons | Apiaceae      | <i>Heracleum</i>     | <i>Heracleum dissectum</i>     | GU967815 |
| Eudicotyledons | Apiaceae      | <i>Heracleum</i>     | <i>Heracleum leskovii</i>      | DQ869371 |
| Eudicotyledons | Apiaceae      | <i>Heracleum</i>     | <i>Heracleum leskovii</i>      | DQ927299 |
| Eudicotyledons | Cucurbitaceae | <i>Trichosanthes</i> | <i>Trichosanthes ovigera</i>   | HQ829557 |
| Eudicotyledons | Cucurbitaceae | <i>Trichosanthes</i> | <i>Trichosanthes ovigera</i>   | HQ829558 |
| Eudicotyledons | Cucurbitaceae | <i>Trichosanthes</i> | <i>Trichosanthes ovigera</i>   | HQ829559 |
| Eudicotyledons | Cucurbitaceae | <i>Trichosanthes</i> | <i>Trichosanthes ovigera</i>   | HQ829560 |
| Eudicotyledons | Cucurbitaceae | <i>Trichosanthes</i> | <i>Trichosanthes ovigera</i>   | HQ829561 |
| Eudicotyledons | Cucurbitaceae | <i>Trichosanthes</i> | <i>Trichosanthes ovigera</i>   | HQ829562 |
| Eudicotyledons | Cucurbitaceae | <i>Trichosanthes</i> | <i>Trichosanthes ovigera</i>   | HQ829563 |
| Eudicotyledons | Cucurbitaceae | <i>Trichosanthes</i> | <i>Trichosanthes ovigera</i>   | HQ829564 |
| Eudicotyledons | Cucurbitaceae | <i>Trichosanthes</i> | <i>Trichosanthes ovigera</i>   | HQ829565 |
| Eudicotyledons | Vitaceae      | <i>Vitis</i>         | <i>Vitis bryoniifolia</i>      | HQ656445 |
| Eudicotyledons | Vitaceae      | <i>Vitis</i>         | <i>Vitis bryoniifolia</i>      | HQ656460 |
| Eudicotyledons | Vitaceae      | <i>Vitis</i>         | <i>Vitis bryoniifolia</i>      | HQ656461 |
| Eudicotyledons | Aceraceae     | <i>Acer</i>          | <i>Acer pectinatum</i>         | HM008586 |
| Eudicotyledons | Aceraceae     | <i>Acer</i>          | <i>Acer pectinatum</i>         | JN043726 |
| Eudicotyledons | Aceraceae     | <i>Acer</i>          | <i>Acer pectinatum</i>         | JN043727 |
| Eudicotyledons | Aceraceae     | <i>Acer</i>          | <i>Acer pectinatum</i>         | JN043728 |
| Eudicotyledons | Ericaceae     | <i>Rhododendron</i>  | <i>Rhododendron agastum</i>    | JN046735 |
| Eudicotyledons | Ericaceae     | <i>Rhododendron</i>  | <i>Rhododendron agastum</i>    | JN046736 |

|                |               |                     |                                   |          |
|----------------|---------------|---------------------|-----------------------------------|----------|
| Eudicotyledons | Ericaceae     | <i>Rhododendron</i> | <i>Rhododendron agastum</i>       | HQ706949 |
| Eudicotyledons | Ericaceae     | <i>Rhododendron</i> | <i>Rhododendron agastum</i>       | HQ706950 |
| Eudicotyledons | Celastraceae  | <i>Parnassia</i>    | <i>Parnassia kotzebuei</i>        | JF802344 |
| Eudicotyledons | Celastraceae  | <i>Parnassia</i>    | <i>Parnassia kotzebuei</i>        | JF802345 |
| Eudicotyledons | Celastraceae  | <i>Parnassia</i>    | <i>Parnassia kotzebuei</i>        | JN045822 |
| Eudicotyledons | Celastraceae  | <i>Parnassia</i>    | <i>Parnassia kotzebuei</i>        | JN045823 |
| Eudicotyledons | Celastraceae  | <i>Parnassia</i>    | <i>Parnassia kotzebuei</i>        | JN045824 |
| Eudicotyledons | Salicaceae    | <i>Salix</i>        | <i>Salix polaris</i>              | GU373291 |
| Eudicotyledons | Salicaceae    | <i>Salix</i>        | <i>Salix polaris</i>              | GU373292 |
| Eudicotyledons | Lamiaceae     | <i>Scutellaria</i>  | <i>Scutellaria barbata</i>        | JQ339246 |
| Eudicotyledons | Lamiaceae     | <i>Scutellaria</i>  | <i>Scutellaria barbata</i>        | JQ339247 |
| Eudicotyledons | Lamiaceae     | <i>Scutellaria</i>  | <i>Scutellaria barbata</i>        | JQ339248 |
| Eudicotyledons | Lamiaceae     | <i>Scutellaria</i>  | <i>Scutellaria barbata</i>        | EU590859 |
| Eudicotyledons | Rosaceae      | <i>Rosa</i>         | <i>Rosa bella</i>                 | DQ778752 |
| Eudicotyledons | Rosaceae      | <i>Rosa</i>         | <i>Rosa bella</i>                 | GQ435258 |
| Eudicotyledons | Rosaceae      | <i>Rosa</i>         | <i>Rosa bridgesii</i>             | DQ778755 |
| Eudicotyledons | Rosaceae      | <i>Rosa</i>         | <i>Rosa bridgesii</i>             | DQ778818 |
| Eudicotyledons | Rosaceae      | <i>Rosa</i>         | <i>Rosa minutifolia</i>           | DQ778786 |
| Eudicotyledons | Rosaceae      | <i>Rosa</i>         | <i>Rosa minutifolia</i>           | DQ778787 |
| Eudicotyledons | Asteraceae    | <i>Centaurea</i>    | <i>Centaurea filiformis</i>       | DQ846186 |
| Eudicotyledons | Asteraceae    | <i>Centaurea</i>    | <i>Centaurea filiformis</i>       | DQ846187 |
| Eudicotyledons | Asteraceae    | <i>Centaurea</i>    | <i>Centaurea filiformis</i>       | DQ846188 |
| Eudicotyledons | Asteraceae    | <i>Centaurea</i>    | <i>Centaurea filiformis</i>       | DQ846252 |
| Eudicotyledons | Asteraceae    | <i>Centaurea</i>    | <i>Centaurea filiformis</i>       | DQ846253 |
| Eudicotyledons | Asteraceae    | <i>Centaurea</i>    | <i>Centaurea filiformis</i>       | DQ846254 |
| Eudicotyledons | Asteraceae    | <i>Centaurea</i>    | <i>Centaurea filiformis</i>       | DQ846255 |
| Eudicotyledons | Asteraceae    | <i>Centaurea</i>    | <i>Centaurea filiformis</i>       | DQ846256 |
| Eudicotyledons | Asteraceae    | <i>Centaurea</i>    | <i>Centaurea filiformis</i>       | DQ846257 |
| Eudicotyledons | Asteraceae    | <i>Centaurea</i>    | <i>Centaurea subtilis</i>         | DQ846219 |
| Eudicotyledons | Asteraceae    | <i>Centaurea</i>    | <i>Centaurea subtilis</i>         | DQ846220 |
| Eudicotyledons | Asteraceae    | <i>Centaurea</i>    | <i>Centaurea subtilis</i>         | DQ846221 |
| Eudicotyledons | Orobanchaceae | <i>Pedicularis</i>  | <i>Pedicularis dichotoma</i>      | JN045964 |
| Eudicotyledons | Orobanchaceae | <i>Pedicularis</i>  | <i>Pedicularis dichotoma</i>      | JN045965 |
| Eudicotyledons | Orobanchaceae | <i>Pedicularis</i>  | <i>Pedicularis dichotoma</i>      | JN045966 |
| Eudicotyledons | Orobanchaceae | <i>Pedicularis</i>  | <i>Pedicularis dichotoma</i>      | JN045967 |
| Eudicotyledons | Orobanchaceae | <i>Pedicularis</i>  | <i>Pedicularis glabrescens</i>    | JN045984 |
| Eudicotyledons | Orobanchaceae | <i>Pedicularis</i>  | <i>Pedicularis glabrescens</i>    | JN045985 |
| Eudicotyledons | Orobanchaceae | <i>Pedicularis</i>  | <i>Pedicularis glabrescens</i>    | JN045986 |
| Eudicotyledons | Orobanchaceae | <i>Pedicularis</i>  | <i>Pedicularis glabrescens</i>    | JN045987 |
| Eudicotyledons | Ericaceae     | <i>Rhododendron</i> | <i>Rhododendron aberconwayi</i>   | JN046731 |
| Eudicotyledons | Ericaceae     | <i>Rhododendron</i> | <i>Rhododendron aberconwayi</i>   | JN046732 |
| Eudicotyledons | Ericaceae     | <i>Rhododendron</i> | <i>Rhododendron anthosphaerum</i> | JN046739 |
| Eudicotyledons | Ericaceae     | <i>Rhododendron</i> | <i>Rhododendron anthosphaerum</i> | JN046740 |
| Eudicotyledons | Ericaceae     | <i>Rhododendron</i> | <i>Rhododendron anthosphaerum</i> | JN046741 |
| Eudicotyledons | Ericaceae     | <i>Rhododendron</i> | <i>Rhododendron anthosphaerum</i> | JN046742 |
| Eudicotyledons | Ericaceae     | <i>Rhododendron</i> | <i>Rhododendron anthosphaerum</i> | HQ706954 |
| Eudicotyledons | Ericaceae     | <i>Rhododendron</i> | <i>Rhododendron fastigiatum</i>   | JN046808 |
| Eudicotyledons | Ericaceae     | <i>Rhododendron</i> | <i>Rhododendron fastigiatum</i>   | JN046809 |
| Eudicotyledons | Ericaceae     | <i>Rhododendron</i> | <i>Rhododendron fastigiatum</i>   | JN046810 |
| Eudicotyledons | Ericaceae     | <i>Rhododendron</i> | <i>Rhododendron fastigiatum</i>   | JN046811 |
| Eudicotyledons | Ericaceae     | <i>Rhododendron</i> | <i>Rhododendron sinogrande</i>    | JN046964 |
| Eudicotyledons | Ericaceae     | <i>Rhododendron</i> | <i>Rhododendron sinogrande</i>    | JN046965 |
| Eudicotyledons | Ericaceae     | <i>Rhododendron</i> | <i>Rhododendron sinogrande</i>    | JN046966 |

|                |                |                       |                                  |          |
|----------------|----------------|-----------------------|----------------------------------|----------|
| Eudicotyledons | Ericaceae      | <i>Rhododendron</i>   | <i>Rhododendron sinogrande</i>   | JN046967 |
| Eudicotyledons | Ericaceae      | <i>Rhododendron</i>   | <i>Rhododendron sinogrande</i>   | JN046968 |
| Eudicotyledons | Ericaceae      | <i>Rhododendron</i>   | <i>Rhododendron lukiangense</i>  | JN046869 |
| Eudicotyledons | Ericaceae      | <i>Rhododendron</i>   | <i>Rhododendron lukiangense</i>  | JN046870 |
| Eudicotyledons | Ericaceae      | <i>Rhododendron</i>   | <i>Rhododendron lukiangense</i>  | JN046871 |
| Eudicotyledons | Ericaceae      | <i>Rhododendron</i>   | <i>Rhododendron rubiginosum</i>  | JN046937 |
| Eudicotyledons | Ericaceae      | <i>Rhododendron</i>   | <i>Rhododendron rubiginosum</i>  | JN046938 |
| Eudicotyledons | Ericaceae      | <i>Rhododendron</i>   | <i>Rhododendron rubiginosum</i>  | JN046939 |
| Eudicotyledons | Ericaceae      | <i>Rhododendron</i>   | <i>Rhododendron rubiginosum</i>  | JN046940 |
| Eudicotyledons | Ericaceae      | <i>Rhododendron</i>   | <i>Rhododendron rubiginosum</i>  | JN046941 |
| Eudicotyledons | Ericaceae      | <i>Rhododendron</i>   | <i>Rhododendron rubiginosum</i>  | JN046942 |
| Eudicotyledons | Ericaceae      | <i>Rhododendron</i>   | <i>Rhododendron rubiginosum</i>  | JN046943 |
| Eudicotyledons | Ericaceae      | <i>Rhododendron</i>   | <i>Rhododendron rubiginosum</i>  | HQ707017 |
| Eudicotyledons | Vitaceae       | <i>Parthenocissus</i> | <i>Parthenocissus vitacea</i>    | HM585681 |
| Eudicotyledons | Vitaceae       | <i>Parthenocissus</i> | <i>Parthenocissus vitacea</i>    | JF437136 |
| Eudicotyledons | Vitaceae       | <i>Parthenocissus</i> | <i>Parthenocissus chinensis</i>  | JQ182502 |
| Eudicotyledons | Vitaceae       | <i>Parthenocissus</i> | <i>Parthenocissus chinensis</i>  | JF437127 |
| Eudicotyledons | Vitaceae       | <i>Parthenocissus</i> | <i>Parthenocissus chinensis</i>  | JF437128 |
| Eudicotyledons | Vitaceae       | <i>Parthenocissus</i> | <i>Parthenocissus dalzielii</i>  | JF437129 |
| Eudicotyledons | Vitaceae       | <i>Parthenocissus</i> | <i>Parthenocissus dalzielii</i>  | JF437130 |
| Eudicotyledons | Vitaceae       | <i>Vitis</i>          | <i>Vitis popenoei</i>            | HM585790 |
| Eudicotyledons | Vitaceae       | <i>Vitis</i>          | <i>Vitis popenoei</i>            | JF437164 |
| Eudicotyledons | Ericaceae      | <i>Rhododendron</i>   | <i>Rhododendron x pulchrum</i>   | HQ707011 |
| Eudicotyledons | Ericaceae      | <i>Rhododendron</i>   | <i>Rhododendron x pulchrum</i>   | HQ707012 |
| Eudicotyledons | Ericaceae      | <i>Rhododendron</i>   | <i>Rhododendron x pulchrum</i>   | HQ707013 |
| Eudicotyledons | Fabaceae       | <i>Acacia</i>         | <i>Acacia saligna</i>            | FJ808535 |
| Eudicotyledons | Fabaceae       | <i>Acacia</i>         | <i>Acacia saligna</i>            | FJ808536 |
| Eudicotyledons | Fabaceae       | <i>Acacia</i>         | <i>Acacia saligna</i>            | FJ808537 |
| Eudicotyledons | Fabaceae       | <i>Acacia</i>         | <i>Acacia saligna</i>            | FJ808538 |
| Eudicotyledons | Oxalidaceae    | <i>Oxalis</i>         | <i>Oxalis sp. JZ-2007</i>        | EF040587 |
| Eudicotyledons | Oxalidaceae    | <i>Oxalis</i>         | <i>Oxalis sp. JZ-2007</i>        | EF040588 |
| Eudicotyledons | Oxalidaceae    | <i>Oxalis</i>         | <i>Oxalis sp. JZ-2007</i>        | EF040589 |
| Eudicotyledons | Oxalidaceae    | <i>Oxalis</i>         | <i>Oxalis sp. JZ-2007</i>        | EF040590 |
| Eudicotyledons | Oxalidaceae    | <i>Oxalis</i>         | <i>Oxalis sp. JZ-2007</i>        | EF040591 |
| Eudicotyledons | Oxalidaceae    | <i>Oxalis</i>         | <i>Oxalis sp. JZ-2007</i>        | EF040592 |
| Eudicotyledons | Oxalidaceae    | <i>Oxalis</i>         | <i>Oxalis sp. JZ-2007</i>        | EF040593 |
| Eudicotyledons | Oxalidaceae    | <i>Oxalis</i>         | <i>Oxalis sp. JZ-2007</i>        | EF040594 |
| Eudicotyledons | Oxalidaceae    | <i>Oxalis</i>         | <i>Oxalis sp. JZ-2007</i>        | EF040595 |
| Eudicotyledons | Oxalidaceae    | <i>Oxalis</i>         | <i>Oxalis sp. JZ-2007</i>        | EF040596 |
| Eudicotyledons | Oxalidaceae    | <i>Oxalis</i>         | <i>Oxalis sp. JZ-2007</i>        | EF040597 |
| Eudicotyledons | Convolvulaceae | <i>Convolvulus</i>    | <i>Convolvulus x despreauxii</i> | EF375930 |
| Eudicotyledons | Convolvulaceae | <i>Convolvulus</i>    | <i>Convolvulus x despreauxii</i> | EF375931 |
| Eudicotyledons | Convolvulaceae | <i>Convolvulus</i>    | <i>Convolvulus x despreauxii</i> | EF375932 |
| Eudicotyledons | Convolvulaceae | <i>Convolvulus</i>    | <i>Convolvulus x despreauxii</i> | EF375933 |
| Eudicotyledons | Convolvulaceae | <i>Convolvulus</i>    | <i>Convolvulus x despreauxii</i> | EF375934 |
| Eudicotyledons | Convolvulaceae | <i>Convolvulus</i>    | <i>Convolvulus x despreauxii</i> | EF375935 |
| Eudicotyledons | Convolvulaceae | <i>Convolvulus</i>    | <i>Convolvulus x despreauxii</i> | EF375936 |
| Eudicotyledons | Convolvulaceae | <i>Convolvulus</i>    | <i>Convolvulus x despreauxii</i> | EF375937 |
| Eudicotyledons | Convolvulaceae | <i>Convolvulus</i>    | <i>Convolvulus x despreauxii</i> | EF375938 |
| Eudicotyledons | Convolvulaceae | <i>Convolvulus</i>    | <i>Convolvulus x despreauxii</i> | EF375939 |
| Eudicotyledons | Convolvulaceae | <i>Convolvulus</i>    | <i>Convolvulus x despreauxii</i> | EF375940 |
| Eudicotyledons | Convolvulaceae | <i>Convolvulus</i>    | <i>Convolvulus x despreauxii</i> | EF375941 |
| Eudicotyledons | Celastraceae   | <i>Parnassia</i>      | <i>Parnassia grandifolia</i>     | JF802337 |

|                |              |                  |                              |          |
|----------------|--------------|------------------|------------------------------|----------|
| Eudicotyledons | Celastraceae | <i>Parnassia</i> | <i>Parnassia grandifolia</i> | JF802338 |
| Eudicotyledons | Asteraceae   | <i>Ligularia</i> | <i>Ligularia dictyoneura</i> | JN045189 |
| Eudicotyledons | Asteraceae   | <i>Ligularia</i> | <i>Ligularia dictyoneura</i> | JN045190 |
| Eudicotyledons | Asteraceae   | <i>Ligularia</i> | <i>Ligularia dictyoneura</i> | JN045191 |
| Eudicotyledons | Asteraceae   | <i>Arnica</i>    | <i>Arnica gracilis</i>       | AM690558 |
| Eudicotyledons | Asteraceae   | <i>Arnica</i>    | <i>Arnica gracilis</i>       | AM690584 |
| Eudicotyledons | Asteraceae   | <i>Arnica</i>    | <i>Arnica montana</i>        | AM690567 |
| Eudicotyledons | Asteraceae   | <i>Arnica</i>    | <i>Arnica montana</i>        | AM690582 |
| Eudicotyledons | Asteraceae   | <i>Arnica</i>    | <i>Arnica nevadensis</i>     | AM690557 |
| Eudicotyledons | Asteraceae   | <i>Arnica</i>    | <i>Arnica nevadensis</i>     | AM690561 |
| Eudicotyledons | Asteraceae   | <i>Arnica</i>    | <i>Arnica ovata</i>          | AM690564 |
| Eudicotyledons | Asteraceae   | <i>Arnica</i>    | <i>Arnica ovata</i>          | AM690576 |
| Eudicotyledons | Asteraceae   | <i>Arnica</i>    | <i>Arnica spathulata</i>     | AM690560 |
| Eudicotyledons | Asteraceae   | <i>Arnica</i>    | <i>Arnica spathulata</i>     | AM690583 |
| Eudicotyledons | Asteraceae   | <i>Arnica</i>    | <i>Arnica acaulis</i>        | AM690559 |
| Eudicotyledons | Asteraceae   | <i>Arnica</i>    | <i>Arnica acaulis</i>        | AM690587 |
| Eudicotyledons | Adoxaceae    | <i>Viburnum</i>  | <i>Viburnum foetidum</i>     | HQ592075 |
| Eudicotyledons | Adoxaceae    | <i>Viburnum</i>  | <i>Viburnum foetidum</i>     | JN047509 |
| Eudicotyledons | Adoxaceae    | <i>Viburnum</i>  | <i>Viburnum foetidum</i>     | JN047510 |
| Eudicotyledons | Adoxaceae    | <i>Viburnum</i>  | <i>Viburnum foetidum</i>     | JN047511 |
| Eudicotyledons | Adoxaceae    | <i>Viburnum</i>  | <i>Viburnum foetidum</i>     | JN047512 |
| Eudicotyledons | Adoxaceae    | <i>Viburnum</i>  | <i>Viburnum foetidum</i>     | JN047513 |
| Eudicotyledons | Adoxaceae    | <i>Viburnum</i>  | <i>Viburnum setigerum</i>    | HQ592096 |
| Eudicotyledons | Adoxaceae    | <i>Viburnum</i>  | <i>Viburnum setigerum</i>    | EF590749 |
| Eudicotyledons | Begoniaceae  | <i>Begonia</i>   | <i>Begonia baviensis</i>     | JN044003 |
| Eudicotyledons | Begoniaceae  | <i>Begonia</i>   | <i>Begonia baviensis</i>     | JN044004 |
| Eudicotyledons | Begoniaceae  | <i>Begonia</i>   | <i>Begonia baviensis</i>     | JN044005 |
| Eudicotyledons | Begoniaceae  | <i>Begonia</i>   | <i>Begonia baviensis</i>     | JN044006 |
| Eudicotyledons | Begoniaceae  | <i>Begonia</i>   | <i>Begonia baviensis</i>     | JN044007 |
| Eudicotyledons | Begoniaceae  | <i>Begonia</i>   | <i>Begonia baviensis</i>     | JN044008 |
| Eudicotyledons | Adoxaceae    | <i>Viburnum</i>  | <i>Viburnum cotinifolium</i> | GQ248401 |
| Eudicotyledons | Adoxaceae    | <i>Viburnum</i>  | <i>Viburnum cotinifolium</i> | EF590748 |
| Eudicotyledons | Fabaceae     | <i>Leucaena</i>  | <i>Leucaena x mixtec</i>     | EF643862 |
| Eudicotyledons | Fabaceae     | <i>Leucaena</i>  | <i>Leucaena x mixtec</i>     | EF643863 |
| Eudicotyledons | Fabaceae     | <i>Leucaena</i>  | <i>Leucaena x mixtec</i>     | EF643873 |
| Eudicotyledons | Fabaceae     | <i>Leucaena</i>  | <i>Leucaena x mixtec</i>     | EF643892 |
| Eudicotyledons | Fabaceae     | <i>Leucaena</i>  | <i>Leucaena x spontanea</i>  | EF643860 |
| Eudicotyledons | Fabaceae     | <i>Leucaena</i>  | <i>Leucaena x spontanea</i>  | EF643864 |
| Eudicotyledons | Fabaceae     | <i>Leucaena</i>  | <i>Leucaena x spontanea</i>  | EF643866 |
| Eudicotyledons | Fabaceae     | <i>Leucaena</i>  | <i>Leucaena x spontanea</i>  | EF643870 |
| Eudicotyledons | Fabaceae     | <i>Leucaena</i>  | <i>Leucaena x spontanea</i>  | EF643871 |
| Eudicotyledons | Lamiaceae    | <i>Origanum</i>  | <i>Origanum onites</i>       | HQ902834 |
| Eudicotyledons | Lamiaceae    | <i>Origanum</i>  | <i>Origanum onites</i>       | HQ902856 |
| Eudicotyledons | Santalaceae  | <i>Santalum</i>  | <i>Santalum spicatum</i>     | HQ170461 |
| Eudicotyledons | Santalaceae  | <i>Santalum</i>  | <i>Santalum spicatum</i>     | HQ170462 |
| Eudicotyledons | Santalaceae  | <i>Santalum</i>  | <i>Santalum spicatum</i>     | HQ170463 |
| Eudicotyledons | Santalaceae  | <i>Santalum</i>  | <i>Santalum spicatum</i>     | HQ170464 |
| Eudicotyledons | Adoxaceae    | <i>Viburnum</i>  | <i>Viburnum awabuki</i>      | HQ592060 |
| Eudicotyledons | Adoxaceae    | <i>Viburnum</i>  | <i>Viburnum awabuki</i>      | JN047523 |
| Eudicotyledons | Adoxaceae    | <i>Viburnum</i>  | <i>Viburnum awabuki</i>      | JN047524 |
| Eudicotyledons | Adoxaceae    | <i>Viburnum</i>  | <i>Viburnum awabuki</i>      | JN047525 |
| Eudicotyledons | Asteraceae   | <i>Inula</i>     | <i>Inula japonica</i>        | GU724261 |
| Eudicotyledons | Asteraceae   | <i>Inula</i>     | <i>Inula japonica</i>        | GU724262 |

|                |               |                    |                                 |          |
|----------------|---------------|--------------------|---------------------------------|----------|
| Eudicotyledons | Fabaceae      | <i>Acacia</i>      | <i>Acacia nigrescens</i>        | EU213784 |
| Eudicotyledons | Fabaceae      | <i>Acacia</i>      | <i>Acacia nigrescens</i>        | EU213785 |
| Eudicotyledons | Solanaceae    | <i>Capsicum</i>    | <i>Capsicum campylopodium</i>   | EF537235 |
| Eudicotyledons | Solanaceae    | <i>Capsicum</i>    | <i>Capsicum campylopodium</i>   | EF537236 |
| Eudicotyledons | Solanaceae    | <i>Capsicum</i>    | <i>Capsicum hunzikerianum</i>   | EF537244 |
| Eudicotyledons | Solanaceae    | <i>Capsicum</i>    | <i>Capsicum hunzikerianum</i>   | EF537245 |
| Eudicotyledons | Solanaceae    | <i>Capsicum</i>    | <i>Capsicum parvifolium</i>     | EF537217 |
| Eudicotyledons | Solanaceae    | <i>Capsicum</i>    | <i>Capsicum parvifolium</i>     | EF537218 |
| Eudicotyledons | Solanaceae    | <i>Capsicum</i>    | <i>Capsicum parvifolium</i>     | EF537219 |
| Eudicotyledons | Solanaceae    | <i>Capsicum</i>    | <i>Capsicum recurvatum</i>      | EF537240 |
| Eudicotyledons | Solanaceae    | <i>Capsicum</i>    | <i>Capsicum recurvatum</i>      | EF537241 |
| Eudicotyledons | Solanaceae    | <i>Capsicum</i>    | <i>Capsicum recurvatum</i>      | EF537242 |
| Eudicotyledons | Solanaceae    | <i>Capsicum</i>    | <i>Capsicum recurvatum</i>      | EF537243 |
| Eudicotyledons | Solanaceae    | <i>Capsicum</i>    | <i>Capsicum rhomboideum</i>     | EF537237 |
| Eudicotyledons | Solanaceae    | <i>Capsicum</i>    | <i>Capsicum rhomboideum</i>     | EF537238 |
| Eudicotyledons | Solanaceae    | <i>Capsicum</i>    | <i>Capsicum rhomboideum</i>     | EF537239 |
| Eudicotyledons | Rubiaceae     | <i>Oldenlandia</i> | <i>Oldenlandia consanguinea</i> | JF699782 |
| Eudicotyledons | Rubiaceae     | <i>Oldenlandia</i> | <i>Oldenlandia consanguinea</i> | JF699783 |
| Eudicotyledons | Rubiaceae     | <i>Oldenlandia</i> | <i>Oldenlandia consanguinea</i> | JN044769 |
| Eudicotyledons | Rubiaceae     | <i>Oldenlandia</i> | <i>Oldenlandia consanguinea</i> | JN044770 |
| Eudicotyledons | Cucurbitaceae | <i>Bryonia</i>     | <i>Bryonia acuta</i>            | EU096433 |
| Eudicotyledons | Cucurbitaceae | <i>Bryonia</i>     | <i>Bryonia acuta</i>            | EU096434 |
| Eudicotyledons | Cucurbitaceae | <i>Bryonia</i>     | <i>Bryonia aspera</i>           | EU683740 |
| Eudicotyledons | Cucurbitaceae | <i>Bryonia</i>     | <i>Bryonia aspera</i>           | EU096423 |
| Eudicotyledons | Cucurbitaceae | <i>Bryonia</i>     | <i>Bryonia aspera</i>           | EU096424 |
| Eudicotyledons | Cucurbitaceae | <i>Bryonia</i>     | <i>Bryonia aspera</i>           | EU096425 |
| Eudicotyledons | Cucurbitaceae | <i>Bryonia</i>     | <i>Bryonia aspera</i>           | EU096426 |
| Eudicotyledons | Cucurbitaceae | <i>Bryonia</i>     | <i>Bryonia aspera</i>           | EU096427 |
| Eudicotyledons | Cucurbitaceae | <i>Bryonia</i>     | <i>Bryonia aspera</i>           | EU096428 |
| Eudicotyledons | Cucurbitaceae | <i>Bryonia</i>     | <i>Bryonia aspera</i>           | EU096429 |
| Eudicotyledons | Cucurbitaceae | <i>Bryonia</i>     | <i>Bryonia aspera</i>           | EU096430 |
| Eudicotyledons | Cucurbitaceae | <i>Bryonia</i>     | <i>Bryonia aspera</i>           | EU096431 |
| Eudicotyledons | Cucurbitaceae | <i>Bryonia</i>     | <i>Bryonia aspera</i>           | EU096432 |
| Eudicotyledons | Cucurbitaceae | <i>Bryonia</i>     | <i>Bryonia aspera</i>           | EU096435 |
| Eudicotyledons | Cucurbitaceae | <i>Bryonia</i>     | <i>Bryonia aspera</i>           | EU096437 |
| Eudicotyledons | Cucurbitaceae | <i>Bryonia</i>     | <i>Bryonia aspera</i>           | EU096438 |
| Eudicotyledons | Cucurbitaceae | <i>Bryonia</i>     | <i>Bryonia aspera</i>           | EU096439 |
| Eudicotyledons | Cucurbitaceae | <i>Bryonia</i>     | <i>Bryonia aspera</i>           | EU096440 |
| Eudicotyledons | Cucurbitaceae | <i>Bryonia</i>     | <i>Bryonia aspera</i>           | EU096441 |
| Eudicotyledons | Cucurbitaceae | <i>Bryonia</i>     | <i>Bryonia aspera</i>           | EU096442 |
| Eudicotyledons | Cucurbitaceae | <i>Bryonia</i>     | <i>Bryonia marmorata</i>        | EU096400 |
| Eudicotyledons | Cucurbitaceae | <i>Bryonia</i>     | <i>Bryonia marmorata</i>        | EU096401 |
| Eudicotyledons | Cucurbitaceae | <i>Bryonia</i>     | <i>Bryonia monoica</i>          | EU096407 |
| Eudicotyledons | Cucurbitaceae | <i>Bryonia</i>     | <i>Bryonia monoica</i>          | EU096408 |
| Eudicotyledons | Cucurbitaceae | <i>Bryonia</i>     | <i>Bryonia monoica</i>          | EU096409 |
| Eudicotyledons | Cucurbitaceae | <i>Bryonia</i>     | <i>Bryonia monoica</i>          | EU096410 |
| Eudicotyledons | Cucurbitaceae | <i>Bryonia</i>     | <i>Bryonia monoica</i>          | EU096411 |
| Eudicotyledons | Cucurbitaceae | <i>Bryonia</i>     | <i>Bryonia monoica</i>          | EU096412 |
| Eudicotyledons | Cucurbitaceae | <i>Bryonia</i>     | <i>Bryonia monoica</i>          | EU096413 |
| Eudicotyledons | Cucurbitaceae | <i>Bryonia</i>     | <i>Bryonia monoica</i>          | EU096414 |
| Eudicotyledons | Cucurbitaceae | <i>Bryonia</i>     | <i>Bryonia monoica</i>          | EU096415 |
| Eudicotyledons | Cucurbitaceae | <i>Bryonia</i>     | <i>Bryonia monoica</i>          | EU096416 |
| Eudicotyledons | Cucurbitaceae | <i>Bryonia</i>     | <i>Bryonia monoica</i>          | EU096417 |



|                |               |                      |                                   |          |
|----------------|---------------|----------------------|-----------------------------------|----------|
| Eudicotyledons | Cucurbitaceae | <i>Bryonia</i>       | <i>Bryonia monoica</i>            | EU096418 |
| Eudicotyledons | Cucurbitaceae | <i>Bryonia</i>       | <i>Bryonia monoica</i>            | EU096419 |
| Eudicotyledons | Cucurbitaceae | <i>Bryonia</i>       | <i>Bryonia monoica</i>            | EU096420 |
| Eudicotyledons | Cucurbitaceae | <i>Bryonia</i>       | <i>Bryonia monoica</i>            | EU096421 |
| Eudicotyledons | Cucurbitaceae | <i>Bryonia</i>       | <i>Bryonia monoica</i>            | EU096422 |
| Eudicotyledons | Cucurbitaceae | <i>Bryonia</i>       | <i>Bryonia multiflora</i>         | EU096348 |
| Eudicotyledons | Cucurbitaceae | <i>Bryonia</i>       | <i>Bryonia multiflora</i>         | EU096349 |
| Eudicotyledons | Cucurbitaceae | <i>Bryonia</i>       | <i>Bryonia syriaca</i>            | EU096350 |
| Eudicotyledons | Cucurbitaceae | <i>Bryonia</i>       | <i>Bryonia syriaca</i>            | EU096351 |
| Eudicotyledons | Cucurbitaceae | <i>Bryonia</i>       | <i>Bryonia syriaca</i>            | EU096352 |
| Eudicotyledons | Cucurbitaceae | <i>Bryonia</i>       | <i>Bryonia syriaca</i>            | EU096353 |
| Eudicotyledons | Cucurbitaceae | <i>Bryonia</i>       | <i>Bryonia syriaca</i>            | EU096354 |
| Eudicotyledons | Cucurbitaceae | <i>Bryonia</i>       | <i>Bryonia syriaca</i>            | EU096355 |
| Eudicotyledons | Cucurbitaceae | <i>Bryonia</i>       | <i>Bryonia syriaca</i>            | EU096356 |
| Eudicotyledons | Cucurbitaceae | <i>Bryonia</i>       | <i>Bryonia verrucosa</i>          | EU096443 |
| Eudicotyledons | Cucurbitaceae | <i>Bryonia</i>       | <i>Bryonia verrucosa</i>          | EU096444 |
| Eudicotyledons | Cucurbitaceae | <i>Bryonia</i>       | <i>Bryonia verrucosa</i>          | EU096445 |
| Eudicotyledons | Salicaceae    | <i>Salix</i>         | <i>Salix phylicifolia</i>         | GU373289 |
| Eudicotyledons | Salicaceae    | <i>Salix</i>         | <i>Salix phylicifolia</i>         | GU373290 |
| Eudicotyledons | Salicaceae    | <i>Salix</i>         | <i>Salix aurita</i>               | GU373275 |
| Eudicotyledons | Salicaceae    | <i>Salix</i>         | <i>Salix aurita</i>               | GU373276 |
| Eudicotyledons | Salicaceae    | <i>Salix</i>         | <i>Salix aurita</i>               | GU373277 |
| Eudicotyledons | Salicaceae    | <i>Salix</i>         | <i>Salix lapponum</i>             | GU373282 |
| Eudicotyledons | Salicaceae    | <i>Salix</i>         | <i>Salix lapponum</i>             | GU373283 |
| Eudicotyledons | Salicaceae    | <i>Salix</i>         | <i>Salix lapponum</i>             | GU373322 |
| Eudicotyledons | Salicaceae    | <i>Salix</i>         | <i>Salix myrsinities</i>          | GU373284 |
| Eudicotyledons | Salicaceae    | <i>Salix</i>         | <i>Salix myrsinities</i>          | GU373285 |
| Eudicotyledons | Salicaceae    | <i>Salix</i>         | <i>Salix myrsinities</i>          | GU373286 |
| Eudicotyledons | Salicaceae    | <i>Salix</i>         | <i>Salix cinerea</i>              | GU373278 |
| Eudicotyledons | Salicaceae    | <i>Salix</i>         | <i>Salix cinerea</i>              | GU373279 |
| Eudicotyledons | Apiaceae      | <i>Heracleum</i>     | <i>Heracleum hemsleyanum</i>      | GU967822 |
| Eudicotyledons | Apiaceae      | <i>Heracleum</i>     | <i>Heracleum hemsleyanum</i>      | GU967823 |
| Eudicotyledons | Apiaceae      | <i>Heracleum</i>     | <i>Heracleum hemsleyanum</i>      | GU967824 |
| Eudicotyledons | Apiaceae      | <i>Heracleum</i>     | <i>Heracleum hemsleyanum</i>      | GU967825 |
| Eudicotyledons | Cucurbitaceae | <i>Trichosanthes</i> | <i>Trichosanthes villosa</i>      | HQ829574 |
| Eudicotyledons | Cucurbitaceae | <i>Trichosanthes</i> | <i>Trichosanthes villosa</i>      | HQ829575 |
| Eudicotyledons | Cucurbitaceae | <i>Trichosanthes</i> | <i>Trichosanthes villosa</i>      | HQ829576 |
| Eudicotyledons | Ericaceae     | <i>Rhododendron</i>  | <i>Rhododendron aganniphum</i>    | JN046733 |
| Eudicotyledons | Ericaceae     | <i>Rhododendron</i>  | <i>Rhododendron aganniphum</i>    | JN046734 |
| Eudicotyledons | Ericaceae     | <i>Rhododendron</i>  | <i>Rhododendron aganniphum</i>    | HQ706948 |
| Eudicotyledons | Ericaceae     | <i>Rhododendron</i>  | <i>Rhododendron alutaceum</i>     | JN046737 |
| Eudicotyledons | Ericaceae     | <i>Rhododendron</i>  | <i>Rhododendron alutaceum</i>     | JN046738 |
| Eudicotyledons | Ericaceae     | <i>Rhododendron</i>  | <i>Rhododendron beesianum</i>     | JN046758 |
| Eudicotyledons | Ericaceae     | <i>Rhododendron</i>  | <i>Rhododendron beesianum</i>     | JN046759 |
| Eudicotyledons | Ericaceae     | <i>Rhododendron</i>  | <i>Rhododendron beesianum</i>     | JN046760 |
| Eudicotyledons | Ericaceae     | <i>Rhododendron</i>  | <i>Rhododendron beesianum</i>     | JN046761 |
| Eudicotyledons | Ericaceae     | <i>Rhododendron</i>  | <i>Rhododendron beesianum</i>     | JN046762 |
| Eudicotyledons | Ericaceae     | <i>Rhododendron</i>  | <i>Rhododendron bureavii</i>      | JN046763 |
| Eudicotyledons | Ericaceae     | <i>Rhododendron</i>  | <i>Rhododendron bureavii</i>      | JN046764 |
| Eudicotyledons | Ericaceae     | <i>Rhododendron</i>  | <i>Rhododendron bureavii</i>      | JN046765 |
| Eudicotyledons | Ericaceae     | <i>Rhododendron</i>  | <i>Rhododendron campylocarpum</i> | JN046770 |
| Eudicotyledons | Ericaceae     | <i>Rhododendron</i>  | <i>Rhododendron campylocarpum</i> | JN046771 |
| Eudicotyledons | Ericaceae     | <i>Rhododendron</i>  | <i>Rhododendron campylocarpum</i> | JN046772 |

|                |            |                     |                                   |          |
|----------------|------------|---------------------|-----------------------------------|----------|
| Eudicotyledons | Ericaceae  | <i>Rhododendron</i> | <i>Rhododendron campylocarpum</i> | JN046773 |
| Eudicotyledons | Ericaceae  | <i>Rhododendron</i> | <i>Rhododendron campylocarpum</i> | JN046774 |
| Eudicotyledons | Ericaceae  | <i>Rhododendron</i> | <i>Rhododendron floccigerum</i>   | JN046814 |
| Eudicotyledons | Ericaceae  | <i>Rhododendron</i> | <i>Rhododendron floccigerum</i>   | JN046815 |
| Eudicotyledons | Ericaceae  | <i>Rhododendron</i> | <i>Rhododendron floccigerum</i>   | JN046816 |
| Eudicotyledons | Ericaceae  | <i>Rhododendron</i> | <i>Rhododendron floccigerum</i>   | JN046817 |
| Eudicotyledons | Ericaceae  | <i>Rhododendron</i> | <i>Rhododendron fulvum</i>        | JN046822 |
| Eudicotyledons | Ericaceae  | <i>Rhododendron</i> | <i>Rhododendron fulvum</i>        | JN046823 |
| Eudicotyledons | Ericaceae  | <i>Rhododendron</i> | <i>Rhododendron glischrum</i>     | JN046828 |
| Eudicotyledons | Ericaceae  | <i>Rhododendron</i> | <i>Rhododendron glischrum</i>     | JN046829 |
| Eudicotyledons | Ericaceae  | <i>Rhododendron</i> | <i>Rhododendron selense</i>       | JN046955 |
| Eudicotyledons | Ericaceae  | <i>Rhododendron</i> | <i>Rhododendron selense</i>       | JN046956 |
| Eudicotyledons | Ericaceae  | <i>Rhododendron</i> | <i>Rhododendron selense</i>       | JN046957 |
| Eudicotyledons | Ericaceae  | <i>Rhododendron</i> | <i>Rhododendron selense</i>       | JN046958 |
| Eudicotyledons | Ericaceae  | <i>Rhododendron</i> | <i>Rhododendron vernicosum</i>    | JN047010 |
| Eudicotyledons | Ericaceae  | <i>Rhododendron</i> | <i>Rhododendron vernicosum</i>    | JN047011 |
| Eudicotyledons | Ericaceae  | <i>Rhododendron</i> | <i>Rhododendron vernicosum</i>    | HQ707029 |
| Eudicotyledons | Ericaceae  | <i>Rhododendron</i> | <i>Rhododendron vernicosum</i>    | HQ707030 |
| Eudicotyledons | Salicaceae | <i>Populus</i>      | <i>Populus grandidentata</i>      | EU750500 |
| Eudicotyledons | Salicaceae | <i>Populus</i>      | <i>Populus grandidentata</i>      | EU750501 |
| Eudicotyledons | Salicaceae | <i>Populus</i>      | <i>Populus grandidentata</i>      | EU750502 |
| Eudicotyledons | Solanaceae | <i>Solanum</i>      | <i>Solanum lichtensteinii</i>     | HM016421 |
| Eudicotyledons | Solanaceae | <i>Solanum</i>      | <i>Solanum lichtensteinii</i>     | HM016426 |
| Eudicotyledons | Oleaceae   | <i>Fraxinus</i>     | <i>Fraxinus apertisquamifera</i>  | HM367381 |
| Eudicotyledons | Oleaceae   | <i>Fraxinus</i>     | <i>Fraxinus apertisquamifera</i>  | HM367382 |
| Eudicotyledons | Oleaceae   | <i>Fraxinus</i>     | <i>Fraxinus apertisquamifera</i>  | HM367383 |
| Eudicotyledons | Oleaceae   | <i>Fraxinus</i>     | <i>Fraxinus apertisquamifera</i>  | HM367384 |
| Eudicotyledons | Oleaceae   | <i>Fraxinus</i>     | <i>Fraxinus apertisquamifera</i>  | HM367385 |
| Eudicotyledons | Oleaceae   | <i>Fraxinus</i>     | <i>Fraxinus apertisquamifera</i>  | HM367386 |
| Eudicotyledons | Oleaceae   | <i>Fraxinus</i>     | <i>Fraxinus apertisquamifera</i>  | HM367387 |
| Eudicotyledons | Oleaceae   | <i>Fraxinus</i>     | <i>Fraxinus apertisquamifera</i>  | HM367388 |
| Eudicotyledons | Oleaceae   | <i>Fraxinus</i>     | <i>Fraxinus berlandieriana</i>    | HM367389 |
| Eudicotyledons | Oleaceae   | <i>Fraxinus</i>     | <i>Fraxinus berlandieriana</i>    | HM367390 |
| Eudicotyledons | Oleaceae   | <i>Fraxinus</i>     | <i>Fraxinus berlandieriana</i>    | HM367391 |
| Eudicotyledons | Oleaceae   | <i>Fraxinus</i>     | <i>Fraxinus bungeana</i>          | HM367394 |
| Eudicotyledons | Oleaceae   | <i>Fraxinus</i>     | <i>Fraxinus bungeana</i>          | HM367395 |
| Eudicotyledons | Oleaceae   | <i>Fraxinus</i>     | <i>Fraxinus bungeana</i>          | HM367396 |
| Eudicotyledons | Oleaceae   | <i>Fraxinus</i>     | <i>Fraxinus caroliniana</i>       | HM367397 |
| Eudicotyledons | Oleaceae   | <i>Fraxinus</i>     | <i>Fraxinus caroliniana</i>       | HM367398 |
| Eudicotyledons | Oleaceae   | <i>Fraxinus</i>     | <i>Fraxinus chiisanensis</i>      | HM367399 |
| Eudicotyledons | Oleaceae   | <i>Fraxinus</i>     | <i>Fraxinus chiisanensis</i>      | HM367400 |
| Eudicotyledons | Oleaceae   | <i>Fraxinus</i>     | <i>Fraxinus chiisanensis</i>      | HM367401 |
| Eudicotyledons | Oleaceae   | <i>Fraxinus</i>     | <i>Fraxinus floribunda</i>        | HM367424 |
| Eudicotyledons | Oleaceae   | <i>Fraxinus</i>     | <i>Fraxinus floribunda</i>        | HM367425 |
| Eudicotyledons | Oleaceae   | <i>Fraxinus</i>     | <i>Fraxinus lanuginosa</i>        | HM367443 |
| Eudicotyledons | Oleaceae   | <i>Fraxinus</i>     | <i>Fraxinus lanuginosa</i>        | HM367444 |
| Eudicotyledons | Oleaceae   | <i>Fraxinus</i>     | <i>Fraxinus lanuginosa</i>        | HM367445 |
| Eudicotyledons | Oleaceae   | <i>Fraxinus</i>     | <i>Fraxinus lanuginosa</i>        | HM367446 |
| Eudicotyledons | Oleaceae   | <i>Fraxinus</i>     | <i>Fraxinus lanuginosa</i>        | HM367447 |
| Eudicotyledons | Oleaceae   | <i>Fraxinus</i>     | <i>Fraxinus lanuginosa</i>        | HM367448 |
| Eudicotyledons | Oleaceae   | <i>Fraxinus</i>     | <i>Fraxinus lanuginosa</i>        | HM367449 |
| Eudicotyledons | Oleaceae   | <i>Fraxinus</i>     | <i>Fraxinus lanuginosa</i>        | HM367450 |
| Eudicotyledons | Oleaceae   | <i>Fraxinus</i>     | <i>Fraxinus lanuginosa</i>        | HM367451 |

|                |               |                     |                              |          |
|----------------|---------------|---------------------|------------------------------|----------|
| Eudicotyledons | Oleaceae      | <i>Fraxinus</i>     | <i>Fraxinus lanuginosa</i>   | HM367452 |
| Eudicotyledons | Oleaceae      | <i>Fraxinus</i>     | <i>Fraxinus lanuginosa</i>   | HM367453 |
| Eudicotyledons | Oleaceae      | <i>Fraxinus</i>     | <i>Fraxinus lanuginosa</i>   | HM367454 |
| Eudicotyledons | Oleaceae      | <i>Fraxinus</i>     | <i>Fraxinus lanuginosa</i>   | HM367455 |
| Eudicotyledons | Oleaceae      | <i>Fraxinus</i>     | <i>Fraxinus lanuginosa</i>   | HM367456 |
| Eudicotyledons | Oleaceae      | <i>Fraxinus</i>     | <i>Fraxinus lanuginosa</i>   | HM367457 |
| Eudicotyledons | Oleaceae      | <i>Fraxinus</i>     | <i>Fraxinus lanuginosa</i>   | HM367458 |
| Eudicotyledons | Oleaceae      | <i>Fraxinus</i>     | <i>Fraxinus lanuginosa</i>   | HM367460 |
| Eudicotyledons | Oleaceae      | <i>Fraxinus</i>     | <i>Fraxinus lanuginosa</i>   | HM367461 |
| Eudicotyledons | Oleaceae      | <i>Fraxinus</i>     | <i>Fraxinus lanuginosa</i>   | HM367462 |
| Eudicotyledons | Oleaceae      | <i>Fraxinus</i>     | <i>Fraxinus lanuginosa</i>   | HM367463 |
| Eudicotyledons | Oleaceae      | <i>Fraxinus</i>     | <i>Fraxinus lanuginosa</i>   | HM367464 |
| Eudicotyledons | Oleaceae      | <i>Fraxinus</i>     | <i>Fraxinus lanuginosa</i>   | HM367465 |
| Eudicotyledons | Oleaceae      | <i>Fraxinus</i>     | <i>Fraxinus lanuginosa</i>   | HM367466 |
| Eudicotyledons | Oleaceae      | <i>Fraxinus</i>     | <i>Fraxinus paxiana</i>      | HM367508 |
| Eudicotyledons | Oleaceae      | <i>Fraxinus</i>     | <i>Fraxinus paxiana</i>      | HM367509 |
| Eudicotyledons | Oleaceae      | <i>Fraxinus</i>     | <i>Fraxinus paxiana</i>      | HM367510 |
| Eudicotyledons | Oleaceae      | <i>Fraxinus</i>     | <i>Fraxinus sieboldiana</i>  | HM367537 |
| Eudicotyledons | Oleaceae      | <i>Fraxinus</i>     | <i>Fraxinus sieboldiana</i>  | HM367538 |
| Eudicotyledons | Oleaceae      | <i>Fraxinus</i>     | <i>Fraxinus sieboldiana</i>  | HM367539 |
| Eudicotyledons | Oleaceae      | <i>Fraxinus</i>     | <i>Fraxinus sieboldiana</i>  | HM367540 |
| Eudicotyledons | Oleaceae      | <i>Fraxinus</i>     | <i>Fraxinus sieboldiana</i>  | HM367541 |
| Eudicotyledons | Oleaceae      | <i>Fraxinus</i>     | <i>Fraxinus sieboldiana</i>  | HM367542 |
| Eudicotyledons | Oleaceae      | <i>Fraxinus</i>     | <i>Fraxinus sieboldiana</i>  | HM367543 |
| Eudicotyledons | Oleaceae      | <i>Fraxinus</i>     | <i>Fraxinus sieboldiana</i>  | HM367544 |
| Eudicotyledons | Oleaceae      | <i>Fraxinus</i>     | <i>Fraxinus sieboldiana</i>  | HM367545 |
| Eudicotyledons | Oleaceae      | <i>Fraxinus</i>     | <i>Fraxinus sieboldiana</i>  | HM367546 |
| Eudicotyledons | Oleaceae      | <i>Fraxinus</i>     | <i>Fraxinus sieboldiana</i>  | HM367547 |
| Eudicotyledons | Oleaceae      | <i>Fraxinus</i>     | <i>Fraxinus spaethiana</i>   | HM367554 |
| Eudicotyledons | Oleaceae      | <i>Fraxinus</i>     | <i>Fraxinus spaethiana</i>   | HM367555 |
| Eudicotyledons | Oleaceae      | <i>Fraxinus</i>     | <i>Fraxinus spaethiana</i>   | HM367556 |
| Eudicotyledons | Oleaceae      | <i>Fraxinus</i>     | <i>Fraxinus spaethiana</i>   | HM367557 |
| Eudicotyledons | Oleaceae      | <i>Fraxinus</i>     | <i>Fraxinus uhdei</i>        | HM367567 |
| Eudicotyledons | Oleaceae      | <i>Fraxinus</i>     | <i>Fraxinus uhdei</i>        | HM367568 |
| Eudicotyledons | Oleaceae      | <i>Fraxinus</i>     | <i>Fraxinus uhdei</i>        | HM367569 |
| Eudicotyledons | Oleaceae      | <i>Fraxinus</i>     | <i>Fraxinus uhdei</i>        | HM367570 |
| Eudicotyledons | Apiaceae      | <i>Heracleum</i>    | <i>Heracleum franchetii</i>  | GU967818 |
| Eudicotyledons | Apiaceae      | <i>Heracleum</i>    | <i>Heracleum franchetii</i>  | GU967819 |
| Eudicotyledons | Apiaceae      | <i>Heracleum</i>    | <i>Heracleum franchetii</i>  | GU967820 |
| Eudicotyledons | Apiaceae      | <i>Heracleum</i>    | <i>Heracleum franchetii</i>  | GU967821 |
| Eudicotyledons | Fabaceae      | <i>Acacia</i>       | <i>Acacia exuvialis</i>      | EU213781 |
| Eudicotyledons | Fabaceae      | <i>Acacia</i>       | <i>Acacia exuvialis</i>      | EU213782 |
| Eudicotyledons | Fabaceae      | <i>Acacia</i>       | <i>Acacia exuvialis</i>      | EU213783 |
| Eudicotyledons | Fabaceae      | <i>Acacia</i>       | <i>Acacia exuvialis</i>      | GQ872312 |
| Eudicotyledons | Aquifoliaceae | <i>Ilex</i>         | <i>Ilex ficoidea</i>         | HQ415419 |
| Eudicotyledons | Aquifoliaceae | <i>Ilex</i>         | <i>Ilex ficoidea</i>         | HQ426979 |
| Eudicotyledons | Vitaceae      | <i>Vitis</i>        | <i>Vitis acerifolia</i>      | HQ656432 |
| Eudicotyledons | Vitaceae      | <i>Vitis</i>        | <i>Vitis acerifolia</i>      | HQ656433 |
| Eudicotyledons | Asteraceae    | <i>Carlina</i>      | <i>Carlina brachylepis</i>   | EU531703 |
| Eudicotyledons | Asteraceae    | <i>Carlina</i>      | <i>Carlina brachylepis</i>   | EU571413 |
| Eudicotyledons | Asteraceae    | <i>Carlina</i>      | <i>Carlina macrophylla</i>   | EU531704 |
| Eudicotyledons | Asteraceae    | <i>Carlina</i>      | <i>Carlina macrophylla</i>   | EU571448 |
| Eudicotyledons | Ericaceae     | <i>Rhododendron</i> | <i>Rhododendron hirsutum</i> | HE585252 |

|                |                |                     |                                  |          |
|----------------|----------------|---------------------|----------------------------------|----------|
| Eudicotyledons | Ericaceae      | <i>Rhododendron</i> | <i>Rhododendron hirsutum</i>     | HE585253 |
| Eudicotyledons | Lamiaceae      | <i>Scutellaria</i>  | <i>Scutellaria rehderiana</i>    | GQ374155 |
| Eudicotyledons | Lamiaceae      | <i>Scutellaria</i>  | <i>Scutellaria rehderiana</i>    | FJ528994 |
| Eudicotyledons | Lamiaceae      | <i>Scutellaria</i>  | <i>Scutellaria rehderiana</i>    | HQ680367 |
| Eudicotyledons | Lamiaceae      | <i>Scutellaria</i>  | <i>Scutellaria rehderiana</i>    | HQ680368 |
| Eudicotyledons | Fabaceae       | <i>Wisteria</i>     | <i>Wisteria villosa</i>          | EU424105 |
| Eudicotyledons | Fabaceae       | <i>Wisteria</i>     | <i>Wisteria villosa</i>          | EU424106 |
| Eudicotyledons | Fabaceae       | <i>Wisteria</i>     | <i>Wisteria villosa</i>          | EU424107 |
| Eudicotyledons | Asteraceae     | <i>Cirsium</i>      | <i>Cirsium japonicum</i>         | GU724249 |
| Eudicotyledons | Asteraceae     | <i>Cirsium</i>      | <i>Cirsium japonicum</i>         | GQ435079 |
| Eudicotyledons | Asteraceae     | <i>Cirsium</i>      | <i>Cirsium japonicum</i>         | GQ435080 |
| Eudicotyledons | Asteraceae     | <i>Cirsium</i>      | <i>Cirsium japonicum</i>         | GQ435081 |
| Eudicotyledons | Asteraceae     | <i>Doniophyton</i>  | <i>Doniophyton weddellii</i>     | EU841294 |
| Eudicotyledons | Asteraceae     | <i>Doniophyton</i>  | <i>Doniophyton weddellii</i>     | EU841295 |
| Eudicotyledons | Salicaceae     | <i>Salix</i>        | <i>Salix x rubens</i>            | GU373310 |
| Eudicotyledons | Salicaceae     | <i>Salix</i>        | <i>Salix x rubens</i>            | GU373311 |
| Eudicotyledons | Salicaceae     | <i>Salix</i>        | <i>Salix x rubens</i>            | GU373312 |
| Eudicotyledons | Oxalidaceae    | <i>Oxalis</i>       | <i>Oxalis dines</i>              | JN983509 |
| Eudicotyledons | Oxalidaceae    | <i>Oxalis</i>       | <i>Oxalis dines</i>              | JN983518 |
| Eudicotyledons | Oxalidaceae    | <i>Oxalis</i>       | <i>Oxalis dines</i>              | JN983519 |
| Eudicotyledons | Oxalidaceae    | <i>Oxalis</i>       | <i>Oxalis dines</i>              | JN983520 |
| Eudicotyledons | Oxalidaceae    | <i>Oxalis</i>       | <i>Oxalis disticha</i>           | JN983510 |
| Eudicotyledons | Oxalidaceae    | <i>Oxalis</i>       | <i>Oxalis disticha</i>           | JN983511 |
| Eudicotyledons | Oxalidaceae    | <i>Oxalis</i>       | <i>Oxalis disticha</i>           | JN983512 |
| Eudicotyledons | Oxalidaceae    | <i>Oxalis</i>       | <i>Oxalis disticha</i>           | JN983513 |
| Eudicotyledons | Oxalidaceae    | <i>Oxalis</i>       | <i>Oxalis disticha</i>           | JN983514 |
| Eudicotyledons | Oxalidaceae    | <i>Oxalis</i>       | <i>Oxalis disticha</i>           | JN983515 |
| Eudicotyledons | Oxalidaceae    | <i>Oxalis</i>       | <i>Oxalis disticha</i>           | JN983516 |
| Eudicotyledons | Oxalidaceae    | <i>Oxalis</i>       | <i>Oxalis disticha</i>           | JN983517 |
| Eudicotyledons | Cucurbitaceae  | <i>Momordica</i>    | <i>Momordica angustisepala</i>   | GQ162969 |
| Eudicotyledons | Cucurbitaceae  | <i>Momordica</i>    | <i>Momordica angustisepala</i>   | GQ162970 |
| Eudicotyledons | Cucurbitaceae  | <i>Momordica</i>    | <i>Momordica angustisepala</i>   | GQ162971 |
| Eudicotyledons | Cucurbitaceae  | <i>Momordica</i>    | <i>Momordica cissoides</i>       | GQ162999 |
| Eudicotyledons | Cucurbitaceae  | <i>Momordica</i>    | <i>Momordica cissoides</i>       | GQ163000 |
| Eudicotyledons | Cucurbitaceae  | <i>Momordica</i>    | <i>Momordica cissoides</i>       | GQ163001 |
| Eudicotyledons | Fabaceae       | <i>Acacia</i>       | <i>Acacia grandicornuta</i>      | GQ872316 |
| Eudicotyledons | Fabaceae       | <i>Acacia</i>       | <i>Acacia grandicornuta</i>      | EU811985 |
| Eudicotyledons | Asteraceae     | <i>Lactuca</i>      | <i>Lactuca canadensis</i>        | GU818401 |
| Eudicotyledons | Asteraceae     | <i>Lactuca</i>      | <i>Lactuca canadensis</i>        | EU750467 |
| Eudicotyledons | Asteraceae     | <i>Lactuca</i>      | <i>Lactuca canadensis</i>        | EU750468 |
| Eudicotyledons | Rhamnaceae     | <i>Rhamnus</i>      | <i>Rhamnus alnifolia</i>         | EU750516 |
| Eudicotyledons | Rhamnaceae     | <i>Rhamnus</i>      | <i>Rhamnus alnifolia</i>         | EU750517 |
| Eudicotyledons | Rosaceae       | <i>Fragaria</i>     | <i>Fragaria corymbosa</i>        | GQ476759 |
| Eudicotyledons | Rosaceae       | <i>Fragaria</i>     | <i>Fragaria corymbosa</i>        | GQ476760 |
| Eudicotyledons | Plantaginaceae | <i>Antirrhinum</i>  | <i>Antirrhinum controversum</i>  | HM152891 |
| Eudicotyledons | Plantaginaceae | <i>Antirrhinum</i>  | <i>Antirrhinum controversum</i>  | HM152892 |
| Eudicotyledons | Plantaginaceae | <i>Antirrhinum</i>  | <i>Antirrhinum controversum</i>  | HM152893 |
| Eudicotyledons | Plantaginaceae | <i>Antirrhinum</i>  | <i>Antirrhinum controversum</i>  | HM152894 |
| Eudicotyledons | Plantaginaceae | <i>Antirrhinum</i>  | <i>Antirrhinum controversum</i>  | HM152895 |
| Eudicotyledons | Plantaginaceae | <i>Antirrhinum</i>  | <i>Antirrhinum controversum</i>  | HM152896 |
| Eudicotyledons | Plantaginaceae | <i>Antirrhinum</i>  | <i>Antirrhinum controversum</i>  | HM152897 |
| Eudicotyledons | Plantaginaceae | <i>Antirrhinum</i>  | <i>Antirrhinum controversum</i>  | HM152898 |
| Eudicotyledons | Araliaceae     | <i>Hydrocotyle</i>  | <i>Hydrocotyle ranunculoides</i> | FM207049 |

|                |             |                    |                                  |          |
|----------------|-------------|--------------------|----------------------------------|----------|
| Eudicotyledons | Araliaceae  | <i>Hydrocotyle</i> | <i>Hydrocotyle ranunculoides</i> | FM207050 |
| Eudicotyledons | Araliaceae  | <i>Hydrocotyle</i> | <i>Hydrocotyle ranunculoides</i> | FM207051 |
| Eudicotyledons | Araliaceae  | <i>Hydrocotyle</i> | <i>Hydrocotyle ranunculoides</i> | FM207052 |
| Eudicotyledons | Araliaceae  | <i>Hydrocotyle</i> | <i>Hydrocotyle ranunculoides</i> | FM207053 |
| Eudicotyledons | Araliaceae  | <i>Hydrocotyle</i> | <i>Hydrocotyle ranunculoides</i> | FM207054 |
| Eudicotyledons | Araliaceae  | <i>Hydrocotyle</i> | <i>Hydrocotyle ranunculoides</i> | FM207055 |
| Eudicotyledons | Araliaceae  | <i>Hydrocotyle</i> | <i>Hydrocotyle ranunculoides</i> | FM207056 |
| Eudicotyledons | Araliaceae  | <i>Hydrocotyle</i> | <i>Hydrocotyle ranunculoides</i> | FM207057 |
| Eudicotyledons | Araliaceae  | <i>Hydrocotyle</i> | <i>Hydrocotyle ranunculoides</i> | FM207058 |
| Eudicotyledons | Araliaceae  | <i>Hydrocotyle</i> | <i>Hydrocotyle ranunculoides</i> | FM207059 |
| Eudicotyledons | Araliaceae  | <i>Hydrocotyle</i> | <i>Hydrocotyle ranunculoides</i> | FM207060 |
| Eudicotyledons | Araliaceae  | <i>Hydrocotyle</i> | <i>Hydrocotyle ranunculoides</i> | FM207061 |
| Eudicotyledons | Araliaceae  | <i>Hydrocotyle</i> | <i>Hydrocotyle leucocephala</i>  | FM207062 |
| Eudicotyledons | Araliaceae  | <i>Hydrocotyle</i> | <i>Hydrocotyle leucocephala</i>  | FM207063 |
| Eudicotyledons | Araliaceae  | <i>Hydrocotyle</i> | <i>Hydrocotyle leucocephala</i>  | FM207064 |
| Eudicotyledons | Araliaceae  | <i>Hydrocotyle</i> | <i>Hydrocotyle leucocephala</i>  | FM207065 |
| Eudicotyledons | Araliaceae  | <i>Hydrocotyle</i> | <i>Hydrocotyle leucocephala</i>  | FM207066 |
| Eudicotyledons | Geraniaceae | <i>Geranium</i>    | <i>Geranium carolinianum</i>     | JN044734 |
| Eudicotyledons | Geraniaceae | <i>Geranium</i>    | <i>Geranium carolinianum</i>     | JN044735 |
| Eudicotyledons | Geraniaceae | <i>Geranium</i>    | <i>Geranium carolinianum</i>     | JN044736 |
| Eudicotyledons | Cornaceae   | <i>Nyssa</i>       | <i>Nyssa javanica</i>            | EU734467 |
| Eudicotyledons | Cornaceae   | <i>Nyssa</i>       | <i>Nyssa javanica</i>            | EU734468 |
| Eudicotyledons | Cornaceae   | <i>Nyssa</i>       | <i>Nyssa shangszeensis</i>       | EU734457 |
| Eudicotyledons | Cornaceae   | <i>Nyssa</i>       | <i>Nyssa shangszeensis</i>       | EU734458 |
| Eudicotyledons | Cornaceae   | <i>Nyssa</i>       | <i>Nyssa shangszeensis</i>       | JN045587 |
| Eudicotyledons | Cornaceae   | <i>Nyssa</i>       | <i>Nyssa shangszeensis</i>       | JN045588 |
| Eudicotyledons | Cornaceae   | <i>Nyssa</i>       | <i>Nyssa shweliensis</i>         | EU734465 |
| Eudicotyledons | Cornaceae   | <i>Nyssa</i>       | <i>Nyssa shweliensis</i>         | EU734466 |
| Eudicotyledons | Cornaceae   | <i>Nyssa</i>       | <i>Nyssa shweliensis</i>         | JN045589 |
| Eudicotyledons | Cornaceae   | <i>Nyssa</i>       | <i>Nyssa shweliensis</i>         | JN045590 |
| Eudicotyledons | Cornaceae   | <i>Nyssa</i>       | <i>Nyssa shweliensis</i>         | JN045591 |
| Eudicotyledons | Cornaceae   | <i>Nyssa</i>       | <i>Nyssa sinensis</i>            | HQ427019 |
| Eudicotyledons | Cornaceae   | <i>Nyssa</i>       | <i>Nyssa sinensis</i>            | EU734459 |
| Eudicotyledons | Cornaceae   | <i>Nyssa</i>       | <i>Nyssa sinensis</i>            | EU734460 |
| Eudicotyledons | Cornaceae   | <i>Nyssa</i>       | <i>Nyssa sinensis</i>            | EU734461 |
| Eudicotyledons | Cornaceae   | <i>Nyssa</i>       | <i>Nyssa sinensis</i>            | EU734462 |
| Eudicotyledons | Cornaceae   | <i>Nyssa</i>       | <i>Nyssa sinensis</i>            | JN045592 |
| Eudicotyledons | Cornaceae   | <i>Nyssa</i>       | <i>Nyssa sinensis</i>            | JN045593 |
| Eudicotyledons | Cornaceae   | <i>Nyssa</i>       | <i>Nyssa sinensis</i>            | JF321237 |
| Eudicotyledons | Cornaceae   | <i>Nyssa</i>       | <i>Nyssa wenshanensis</i>        | EU734463 |
| Eudicotyledons | Cornaceae   | <i>Nyssa</i>       | <i>Nyssa wenshanensis</i>        | EU734464 |
| Eudicotyledons | Cornaceae   | <i>Nyssa</i>       | <i>Nyssa wenshanensis</i>        | JN045597 |
| Eudicotyledons | Cornaceae   | <i>Nyssa</i>       | <i>Nyssa wenshanensis</i>        | JN045598 |
| Eudicotyledons | Asteraceae  | <i>Arctotis</i>    | <i>Arctotis debensis</i>         | EU846406 |
| Eudicotyledons | Asteraceae  | <i>Arctotis</i>    | <i>Arctotis debensis</i>         | EU846407 |
| Eudicotyledons | Asteraceae  | <i>Arctotis</i>    | <i>Arctotis erosa</i>            | EU846427 |
| Eudicotyledons | Asteraceae  | <i>Arctotis</i>    | <i>Arctotis erosa</i>            | EU846428 |
| Eudicotyledons | Asteraceae  | <i>Arctotis</i>    | <i>Arctotis erosa</i>            | EU846429 |
| Eudicotyledons | Asteraceae  | <i>Arctotis</i>    | <i>Arctotis erosa</i>            | EU846430 |
| Eudicotyledons | Asteraceae  | <i>Arctotis</i>    | <i>Arctotis flaccida</i>         | EU846432 |
| Eudicotyledons | Asteraceae  | <i>Arctotis</i>    | <i>Arctotis flaccida</i>         | EU846433 |
| Eudicotyledons | Asteraceae  | <i>Arctotis</i>    | <i>Arctotis incisa</i>           | EU846436 |
| Eudicotyledons | Asteraceae  | <i>Arctotis</i>    | <i>Arctotis incisa</i>           | EU846437 |

|                |            |                    |                                |          |
|----------------|------------|--------------------|--------------------------------|----------|
| Eudicotyledons | Asteraceae | <i>Arctotis</i>    | <i>Arctotis lanceolata</i>     | EU846439 |
| Eudicotyledons | Asteraceae | <i>Arctotis</i>    | <i>Arctotis lanceolata</i>     | EU846440 |
| Eudicotyledons | Asteraceae | <i>Arctotis</i>    | <i>Arctotis microcephala</i>   | EU846409 |
| Eudicotyledons | Asteraceae | <i>Arctotis</i>    | <i>Arctotis microcephala</i>   | EU846410 |
| Eudicotyledons | Asteraceae | <i>Arctotis</i>    | <i>Arctotis revoluta</i>       | EU846446 |
| Eudicotyledons | Asteraceae | <i>Arctotis</i>    | <i>Arctotis revoluta</i>       | EU846447 |
| Eudicotyledons | Asteraceae | <i>Arctotis</i>    | <i>Arctotis scapiformis</i>    | EU846412 |
| Eudicotyledons | Asteraceae | <i>Arctotis</i>    | <i>Arctotis scapiformis</i>    | EU846413 |
| Eudicotyledons | Asteraceae | <i>Arctotis</i>    | <i>Arctotis semipapposa</i>    | EU846449 |
| Eudicotyledons | Asteraceae | <i>Arctotis</i>    | <i>Arctotis semipapposa</i>    | EU846450 |
| Eudicotyledons | Asteraceae | <i>Arctotis</i>    | <i>Arctotis verbascifolia</i>  | EU846453 |
| Eudicotyledons | Asteraceae | <i>Arctotis</i>    | <i>Arctotis verbascifolia</i>  | EU846454 |
| Eudicotyledons | Asteraceae | <i>Arctotis</i>    | <i>Arctotis sp. C RJM-2008</i> | EU846458 |
| Eudicotyledons | Asteraceae | <i>Arctotis</i>    | <i>Arctotis sp. C RJM-2008</i> | EU846459 |
| Eudicotyledons | Asteraceae | <i>Cirsium</i>     | <i>Cirsium setosum</i>         | GQ435076 |
| Eudicotyledons | Asteraceae | <i>Cirsium</i>     | <i>Cirsium setosum</i>         | GQ435077 |
| Eudicotyledons | Asteraceae | <i>Cirsium</i>     | <i>Cirsium setosum</i>         | GQ435078 |
| Eudicotyledons | Lamiaceae  | <i>Leonurus</i>    | <i>Leonurus cardiaca</i>       | HQ596745 |
| Eudicotyledons | Lamiaceae  | <i>Leonurus</i>    | <i>Leonurus cardiaca</i>       | FJ513116 |
| Eudicotyledons | Asteraceae | <i>Lychnophora</i> | <i>Lychnophora ericoides</i>   | FJ031669 |
| Eudicotyledons | Asteraceae | <i>Lychnophora</i> | <i>Lychnophora ericoides</i>   | FJ031670 |
| Eudicotyledons | Asteraceae | <i>Lychnophora</i> | <i>Lychnophora ericoides</i>   | FJ031671 |
| Eudicotyledons | Asteraceae | <i>Lychnophora</i> | <i>Lychnophora ericoides</i>   | FJ031672 |
| Eudicotyledons | Asteraceae | <i>Lychnophora</i> | <i>Lychnophora ericoides</i>   | FJ031673 |
| Eudicotyledons | Asteraceae | <i>Lychnophora</i> | <i>Lychnophora ericoides</i>   | FJ031674 |
| Eudicotyledons | Asteraceae | <i>Lychnophora</i> | <i>Lychnophora ericoides</i>   | FJ031675 |
| Eudicotyledons | Asteraceae | <i>Lychnophora</i> | <i>Lychnophora ericoides</i>   | FJ031676 |
| Eudicotyledons | Asteraceae | <i>Lychnophora</i> | <i>Lychnophora ericoides</i>   | FJ031677 |
| Eudicotyledons | Asteraceae | <i>Lychnophora</i> | <i>Lychnophora ericoides</i>   | FJ031678 |
| Eudicotyledons | Asteraceae | <i>Lychnophora</i> | <i>Lychnophora ericoides</i>   | FJ031679 |
| Eudicotyledons | Asteraceae | <i>Lychnophora</i> | <i>Lychnophora ericoides</i>   | FJ031680 |
| Eudicotyledons | Asteraceae | <i>Lychnophora</i> | <i>Lychnophora ericoides</i>   | FJ031681 |
| Eudicotyledons | Asteraceae | <i>Lychnophora</i> | <i>Lychnophora ericoides</i>   | FJ031682 |
| Eudicotyledons | Asteraceae | <i>Lychnophora</i> | <i>Lychnophora ericoides</i>   | FJ031683 |
| Eudicotyledons | Asteraceae | <i>Lychnophora</i> | <i>Lychnophora ericoides</i>   | FJ031684 |
| Eudicotyledons | Asteraceae | <i>Lychnophora</i> | <i>Lychnophora ericoides</i>   | FJ031685 |
| Eudicotyledons | Asteraceae | <i>Lychnophora</i> | <i>Lychnophora ericoides</i>   | FJ031686 |
| Eudicotyledons | Asteraceae | <i>Lychnophora</i> | <i>Lychnophora ericoides</i>   | FJ031687 |
| Eudicotyledons | Asteraceae | <i>Lychnophora</i> | <i>Lychnophora ericoides</i>   | FJ031688 |
| Eudicotyledons | Asteraceae | <i>Lychnophora</i> | <i>Lychnophora ericoides</i>   | FJ031689 |
| Eudicotyledons | Asteraceae | <i>Lychnophora</i> | <i>Lychnophora ericoides</i>   | FJ031690 |
| Eudicotyledons | Asteraceae | <i>Lychnophora</i> | <i>Lychnophora ericoides</i>   | FJ031691 |
| Eudicotyledons | Asteraceae | <i>Lychnophora</i> | <i>Lychnophora ericoides</i>   | FJ031692 |
| Eudicotyledons | Asteraceae | <i>Lychnophora</i> | <i>Lychnophora ericoides</i>   | FJ031693 |
| Eudicotyledons | Asteraceae | <i>Lychnophora</i> | <i>Lychnophora ericoides</i>   | FJ031694 |
| Eudicotyledons | Asteraceae | <i>Lychnophora</i> | <i>Lychnophora ericoides</i>   | FJ031695 |
| Eudicotyledons | Asteraceae | <i>Lychnophora</i> | <i>Lychnophora ericoides</i>   | FJ031696 |
| Eudicotyledons | Asteraceae | <i>Lychnophora</i> | <i>Lychnophora ericoides</i>   | FJ031697 |
| Eudicotyledons | Asteraceae | <i>Lychnophora</i> | <i>Lychnophora ericoides</i>   | FJ031698 |
| Eudicotyledons | Asteraceae | <i>Lychnophora</i> | <i>Lychnophora ericoides</i>   | FJ031699 |
| Eudicotyledons | Asteraceae | <i>Lychnophora</i> | <i>Lychnophora ericoides</i>   | FJ031700 |
| Eudicotyledons | Asteraceae | <i>Lychnophora</i> | <i>Lychnophora ericoides</i>   | FJ031701 |
| Eudicotyledons | Asteraceae | <i>Lychnophora</i> | <i>Lychnophora ericoides</i>   | FJ031702 |









|                |            |                    |                                 |          |
|----------------|------------|--------------------|---------------------------------|----------|
| Eudicotyledons | Asteraceae | <i>Lychnophora</i> | <i>Lychnophora diamantinana</i> | FJ031846 |
| Eudicotyledons | Asteraceae | <i>Lychnophora</i> | <i>Lychnophora diamantinana</i> | FJ031847 |
| Eudicotyledons | Asteraceae | <i>Lychnophora</i> | <i>Lychnophora diamantinana</i> | FJ031848 |
| Eudicotyledons | Sapotaceae | <i>Manilkara</i>   | <i>Manilkara bidentata</i>      | GQ428717 |
| Eudicotyledons | Sapotaceae | <i>Manilkara</i>   | <i>Manilkara bidentata</i>      | FJ039059 |
| Eudicotyledons | Sapotaceae | <i>Manilkara</i>   | <i>Manilkara bidentata</i>      | HM446954 |
| Eudicotyledons | Meliaceae  | <i>Trichilia</i>   | <i>Trichilia cipo</i>           | FJ039003 |
| Eudicotyledons | Meliaceae  | <i>Trichilia</i>   | <i>Trichilia cipo</i>           | FJ039004 |
| Eudicotyledons | Meliaceae  | <i>Trichilia</i>   | <i>Trichilia pallida</i>        | GQ428732 |
| Eudicotyledons | Meliaceae  | <i>Trichilia</i>   | <i>Trichilia pallida</i>        | FJ039005 |
| Eudicotyledons | Meliaceae  | <i>Trichilia</i>   | <i>Trichilia pallida</i>        | FJ039006 |
| Eudicotyledons | Meliaceae  | <i>Trichilia</i>   | <i>Trichilia pallida</i>        | GQ982392 |
| Eudicotyledons | Meliaceae  | <i>Trichilia</i>   | <i>Trichilia pallida</i>        | HM447009 |
| Eudicotyledons | Loasaceae  | <i>Mentzelia</i>   | <i>Mentzelia affinis</i>        | FJ918124 |
| Eudicotyledons | Loasaceae  | <i>Mentzelia</i>   | <i>Mentzelia affinis</i>        | FJ918125 |
| Eudicotyledons | Loasaceae  | <i>Mentzelia</i>   | <i>Mentzelia affinis</i>        | FJ918126 |
| Eudicotyledons | Loasaceae  | <i>Mentzelia</i>   | <i>Mentzelia sp. JMB-2009a</i>  | FJ918131 |
| Eudicotyledons | Loasaceae  | <i>Mentzelia</i>   | <i>Mentzelia sp. JMB-2009a</i>  | FJ918132 |
| Eudicotyledons | Loasaceae  | <i>Mentzelia</i>   | <i>Mentzelia sp. JMB-2009a</i>  | FJ918133 |
| Eudicotyledons | Loasaceae  | <i>Mentzelia</i>   | <i>Mentzelia sp. JMB-2009a</i>  | FJ918134 |
| Eudicotyledons | Loasaceae  | <i>Mentzelia</i>   | <i>Mentzelia sp. JMB-2009a</i>  | FJ918135 |
| Eudicotyledons | Loasaceae  | <i>Mentzelia</i>   | <i>Mentzelia californica</i>    | FJ918136 |
| Eudicotyledons | Loasaceae  | <i>Mentzelia</i>   | <i>Mentzelia californica</i>    | FJ918137 |
| Eudicotyledons | Loasaceae  | <i>Mentzelia</i>   | <i>Mentzelia californica</i>    | FJ918138 |
| Eudicotyledons | Loasaceae  | <i>Mentzelia</i>   | <i>Mentzelia crocea</i>         | FJ918142 |
| Eudicotyledons | Loasaceae  | <i>Mentzelia</i>   | <i>Mentzelia crocea</i>         | FJ918143 |
| Eudicotyledons | Loasaceae  | <i>Mentzelia</i>   | <i>Mentzelia crocea</i>         | FJ918144 |
| Eudicotyledons | Loasaceae  | <i>Mentzelia</i>   | <i>Mentzelia desertorum</i>     | FJ918145 |
| Eudicotyledons | Loasaceae  | <i>Mentzelia</i>   | <i>Mentzelia desertorum</i>     | FJ918146 |
| Eudicotyledons | Loasaceae  | <i>Mentzelia</i>   | <i>Mentzelia desertorum</i>     | FJ918147 |
| Eudicotyledons | Loasaceae  | <i>Mentzelia</i>   | <i>Mentzelia desertorum</i>     | FJ918148 |
| Eudicotyledons | Loasaceae  | <i>Mentzelia</i>   | <i>Mentzelia desertorum</i>     | FJ918149 |
| Eudicotyledons | Loasaceae  | <i>Mentzelia</i>   | <i>Mentzelia eremophila</i>     | FJ918152 |
| Eudicotyledons | Loasaceae  | <i>Mentzelia</i>   | <i>Mentzelia eremophila</i>     | FJ918153 |
| Eudicotyledons | Loasaceae  | <i>Mentzelia</i>   | <i>Mentzelia eremophila</i>     | FJ918154 |
| Eudicotyledons | Loasaceae  | <i>Mentzelia</i>   | <i>Mentzelia jonesii</i>        | FJ918158 |
| Eudicotyledons | Loasaceae  | <i>Mentzelia</i>   | <i>Mentzelia jonesii</i>        | FJ918159 |
| Eudicotyledons | Loasaceae  | <i>Mentzelia</i>   | <i>Mentzelia jonesii</i>        | FJ918160 |
| Eudicotyledons | Loasaceae  | <i>Mentzelia</i>   | <i>Mentzelia jonesii</i>        | FJ918161 |
| Eudicotyledons | Loasaceae  | <i>Mentzelia</i>   | <i>Mentzelia jonesii</i>        | FJ918162 |
| Eudicotyledons | Loasaceae  | <i>Mentzelia</i>   | <i>Mentzelia mojavensis</i>     | FJ918168 |
| Eudicotyledons | Loasaceae  | <i>Mentzelia</i>   | <i>Mentzelia mojavensis</i>     | FJ918169 |
| Eudicotyledons | Loasaceae  | <i>Mentzelia</i>   | <i>Mentzelia mojavensis</i>     | FJ918170 |
| Eudicotyledons | Loasaceae  | <i>Mentzelia</i>   | <i>Mentzelia mojavensis</i>     | FJ918171 |
| Eudicotyledons | Loasaceae  | <i>Mentzelia</i>   | <i>Mentzelia mollis</i>         | FJ918172 |
| Eudicotyledons | Loasaceae  | <i>Mentzelia</i>   | <i>Mentzelia mollis</i>         | FJ918173 |
| Eudicotyledons | Loasaceae  | <i>Mentzelia</i>   | <i>Mentzelia mollis</i>         | FJ918174 |
| Eudicotyledons | Loasaceae  | <i>Mentzelia</i>   | <i>Mentzelia mollis</i>         | FJ918175 |
| Eudicotyledons | Loasaceae  | <i>Mentzelia</i>   | <i>Mentzelia mollis</i>         | FJ918176 |
| Eudicotyledons | Loasaceae  | <i>Mentzelia</i>   | <i>Mentzelia mollis</i>         | FJ918177 |
| Eudicotyledons | Loasaceae  | <i>Mentzelia</i>   | <i>Mentzelia sp. JMB-2009b</i>  | FJ918178 |
| Eudicotyledons | Loasaceae  | <i>Mentzelia</i>   | <i>Mentzelia sp. JMB-2009b</i>  | FJ918179 |
| Eudicotyledons | Loasaceae  | <i>Mentzelia</i>   | <i>Mentzelia sp. JMB-2009b</i>  | FJ918180 |

|                |                 |                      |                                 |          |
|----------------|-----------------|----------------------|---------------------------------|----------|
| Eudicotyledons | Loasaceae       | <i>Mentzelia</i>     | <i>Mentzelia montana</i>        | FJ918181 |
| Eudicotyledons | Loasaceae       | <i>Mentzelia</i>     | <i>Mentzelia montana</i>        | FJ918182 |
| Eudicotyledons | Loasaceae       | <i>Mentzelia</i>     | <i>Mentzelia montana</i>        | FJ918201 |
| Eudicotyledons | Loasaceae       | <i>Mentzelia</i>     | <i>Mentzelia montana</i>        | FJ918202 |
| Eudicotyledons | Loasaceae       | <i>Mentzelia</i>     | <i>Mentzelia obscura</i>        | FJ918188 |
| Eudicotyledons | Loasaceae       | <i>Mentzelia</i>     | <i>Mentzelia obscura</i>        | FJ918189 |
| Eudicotyledons | Loasaceae       | <i>Mentzelia</i>     | <i>Mentzelia obscura</i>        | FJ918190 |
| Eudicotyledons | Loasaceae       | <i>Mentzelia</i>     | <i>Mentzelia packardiae</i>     | FJ918191 |
| Eudicotyledons | Loasaceae       | <i>Mentzelia</i>     | <i>Mentzelia packardiae</i>     | FJ918192 |
| Eudicotyledons | Loasaceae       | <i>Mentzelia</i>     | <i>Mentzelia packardiae</i>     | FJ918193 |
| Eudicotyledons | Loasaceae       | <i>Mentzelia</i>     | <i>Mentzelia packardiae</i>     | FJ918194 |
| Eudicotyledons | Loasaceae       | <i>Mentzelia</i>     | <i>Mentzelia pectinata</i>      | FJ918195 |
| Eudicotyledons | Loasaceae       | <i>Mentzelia</i>     | <i>Mentzelia pectinata</i>      | FJ918196 |
| Eudicotyledons | Loasaceae       | <i>Mentzelia</i>     | <i>Mentzelia pectinata</i>      | FJ918197 |
| Eudicotyledons | Loasaceae       | <i>Mentzelia</i>     | <i>Mentzelia ravenii</i>        | FJ918198 |
| Eudicotyledons | Loasaceae       | <i>Mentzelia</i>     | <i>Mentzelia ravenii</i>        | FJ918199 |
| Eudicotyledons | Loasaceae       | <i>Mentzelia</i>     | <i>Mentzelia ravenii</i>        | FJ918200 |
| Eudicotyledons | Loasaceae       | <i>Mentzelia</i>     | <i>Mentzelia thompsonii</i>     | FJ918203 |
| Eudicotyledons | Loasaceae       | <i>Mentzelia</i>     | <i>Mentzelia thompsonii</i>     | FJ918204 |
| Eudicotyledons | Loasaceae       | <i>Mentzelia</i>     | <i>Mentzelia thompsonii</i>     | FJ918205 |
| Eudicotyledons | Loasaceae       | <i>Mentzelia</i>     | <i>Mentzelia veatchiana</i>     | FJ918206 |
| Eudicotyledons | Loasaceae       | <i>Mentzelia</i>     | <i>Mentzelia veatchiana</i>     | FJ918207 |
| Eudicotyledons | Loasaceae       | <i>Mentzelia</i>     | <i>Mentzelia veatchiana</i>     | FJ918208 |
| Eudicotyledons | Loasaceae       | <i>Mentzelia</i>     | <i>Mentzelia veatchiana</i>     | FJ918209 |
| Eudicotyledons | Caryophyllaceae | <i>Dianthus</i>      | <i>Dianthus armeria</i>         | GU441005 |
| Eudicotyledons | Caryophyllaceae | <i>Dianthus</i>      | <i>Dianthus armeria</i>         | GU441006 |
| Eudicotyledons | Rosaceae        | <i>Rosa</i>          | <i>Rosa longicuspis</i>         | GU575154 |
| Eudicotyledons | Rosaceae        | <i>Rosa</i>          | <i>Rosa longicuspis</i>         | GU575155 |
| Eudicotyledons | Cucurbitaceae   | <i>Momordica</i>     | <i>Momordica cymbalaria</i>     | GQ163010 |
| Eudicotyledons | Cucurbitaceae   | <i>Momordica</i>     | <i>Momordica cymbalaria</i>     | GQ163011 |
| Eudicotyledons | Cucurbitaceae   | <i>Momordica</i>     | <i>Momordica cymbalaria</i>     | GQ163012 |
| Eudicotyledons | Cucurbitaceae   | <i>Momordica</i>     | <i>Momordica dioica</i>         | GQ163017 |
| Eudicotyledons | Cucurbitaceae   | <i>Momordica</i>     | <i>Momordica dioica</i>         | GQ163018 |
| Eudicotyledons | Cucurbitaceae   | <i>Momordica</i>     | <i>Momordica dioica</i>         | GQ163019 |
| Eudicotyledons | Fabaceae        | <i>Acacia</i>        | <i>Acacia arabica</i>           | FJ808539 |
| Eudicotyledons | Fabaceae        | <i>Acacia</i>        | <i>Acacia arabica</i>           | FJ808540 |
| Eudicotyledons | Asteraceae      | <i>Artemisia</i>     | <i>Artemisia lactiflora</i>     | GU724245 |
| Eudicotyledons | Asteraceae      | <i>Artemisia</i>     | <i>Artemisia lactiflora</i>     | GU724246 |
| Eudicotyledons | Nitrariaceae    | <i>Peganum</i>       | <i>Peganum multisectum</i>      | FJ752658 |
| Eudicotyledons | Nitrariaceae    | <i>Peganum</i>       | <i>Peganum multisectum</i>      | FJ752659 |
| Eudicotyledons | Nitrariaceae    | <i>Peganum</i>       | <i>Peganum multisectum</i>      | FJ752660 |
| Eudicotyledons | Nitrariaceae    | <i>Peganum</i>       | <i>Peganum multisectum</i>      | FJ752662 |
| Eudicotyledons | Nitrariaceae    | <i>Peganum</i>       | <i>Peganum multisectum</i>      | FJ752665 |
| Eudicotyledons | Nitrariaceae    | <i>Peganum</i>       | <i>Peganum nigellastrum</i>     | FJ752654 |
| Eudicotyledons | Nitrariaceae    | <i>Peganum</i>       | <i>Peganum nigellastrum</i>     | FJ752655 |
| Eudicotyledons | Nitrariaceae    | <i>Peganum</i>       | <i>Peganum nigellastrum</i>     | FJ752663 |
| Eudicotyledons | Nitrariaceae    | <i>Peganum</i>       | <i>Peganum nigellastrum</i>     | FJ752667 |
| Eudicotyledons | Nitrariaceae    | <i>Peganum</i>       | <i>Peganum nigellastrum</i>     | FJ752668 |
| Eudicotyledons | Rosaceae        | <i>Fragaria</i>      | <i>Fragaria chinensis</i>       | GQ476757 |
| Eudicotyledons | Rosaceae        | <i>Fragaria</i>      | <i>Fragaria chinensis</i>       | GQ476758 |
| Eudicotyledons | Cucurbitaceae   | <i>Trichosanthes</i> | <i>Trichosanthes rosthornii</i> | GQ845128 |
| Eudicotyledons | Cucurbitaceae   | <i>Trichosanthes</i> | <i>Trichosanthes rosthornii</i> | GQ845129 |
| Eudicotyledons | Cucurbitaceae   | <i>Trichosanthes</i> | <i>Trichosanthes rosthornii</i> | GQ845130 |

|                |               |                      |                                   |          |
|----------------|---------------|----------------------|-----------------------------------|----------|
| Eudicotyledons | Cucurbitaceae | <i>Trichosanthes</i> | <i>Trichosanthes cucumeroides</i> | HQ829550 |
| Eudicotyledons | Cucurbitaceae | <i>Trichosanthes</i> | <i>Trichosanthes cucumeroides</i> | HQ829551 |
| Eudicotyledons | Cucurbitaceae | <i>Trichosanthes</i> | <i>Trichosanthes cucumeroides</i> | HQ829552 |
| Eudicotyledons | Cucurbitaceae | <i>Trichosanthes</i> | <i>Trichosanthes truncata</i>     | HQ829570 |
| Eudicotyledons | Cucurbitaceae | <i>Trichosanthes</i> | <i>Trichosanthes truncata</i>     | HQ829571 |
| Eudicotyledons | Cucurbitaceae | <i>Trichosanthes</i> | <i>Trichosanthes truncata</i>     | HQ829572 |
| Eudicotyledons | Cucurbitaceae | <i>Trichosanthes</i> | <i>Trichosanthes truncata</i>     | HQ829573 |
| Eudicotyledons | Cucurbitaceae | <i>Trichosanthes</i> | <i>Trichosanthes truncata</i>     | HQ829577 |
| Eudicotyledons | Solanaceae    | <i>Solanum</i>       | <i>Solanum diphyllum</i>          | GU135297 |
| Eudicotyledons | Solanaceae    | <i>Solanum</i>       | <i>Solanum diphyllum</i>          | GU135375 |
| Eudicotyledons | Vitaceae      | <i>Vitis</i>         | <i>Vitis coignetiae</i>           | HQ108319 |
| Eudicotyledons | Vitaceae      | <i>Vitis</i>         | <i>Vitis coignetiae</i>           | HQ656468 |
| Eudicotyledons | Cucurbitaceae | <i>Momordica</i>     | <i>Momordica anigosantha</i>      | GQ162972 |
| Eudicotyledons | Cucurbitaceae | <i>Momordica</i>     | <i>Momordica anigosantha</i>      | GQ162973 |
| Eudicotyledons | Cucurbitaceae | <i>Momordica</i>     | <i>Momordica boivinii</i>         | GQ162978 |
| Eudicotyledons | Cucurbitaceae | <i>Momordica</i>     | <i>Momordica boivinii</i>         | GQ162979 |
| Eudicotyledons | Cucurbitaceae | <i>Momordica</i>     | <i>Momordica boivinii</i>         | GQ162980 |
| Eudicotyledons | Cucurbitaceae | <i>Momordica</i>     | <i>Momordica camerounensis</i>    | GQ162988 |
| Eudicotyledons | Cucurbitaceae | <i>Momordica</i>     | <i>Momordica camerounensis</i>    | GQ162989 |
| Eudicotyledons | Cucurbitaceae | <i>Momordica</i>     | <i>Momordica cardiospermoides</i> | GQ162990 |
| Eudicotyledons | Cucurbitaceae | <i>Momordica</i>     | <i>Momordica cardiospermoides</i> | GQ162991 |
| Eudicotyledons | Cucurbitaceae | <i>Momordica</i>     | <i>Momordica clarkeana</i>        | GQ163002 |
| Eudicotyledons | Cucurbitaceae | <i>Momordica</i>     | <i>Momordica clarkeana</i>        | GQ163003 |
| Eudicotyledons | Cucurbitaceae | <i>Momordica</i>     | <i>Momordica corymbifera</i>      | GQ163008 |
| Eudicotyledons | Cucurbitaceae | <i>Momordica</i>     | <i>Momordica corymbifera</i>      | GQ163009 |
| Eudicotyledons | Cucurbitaceae | <i>Momordica</i>     | <i>Momordica denticulata</i>      | GQ163013 |
| Eudicotyledons | Cucurbitaceae | <i>Momordica</i>     | <i>Momordica denticulata</i>      | GQ163014 |
| Eudicotyledons | Cucurbitaceae | <i>Momordica</i>     | <i>Momordica denudata</i>         | GQ163015 |
| Eudicotyledons | Cucurbitaceae | <i>Momordica</i>     | <i>Momordica denudata</i>         | GQ163016 |
| Eudicotyledons | Cucurbitaceae | <i>Momordica</i>     | <i>Momordica enneaphylla</i>      | GQ163021 |
| Eudicotyledons | Cucurbitaceae | <i>Momordica</i>     | <i>Momordica enneaphylla</i>      | GQ163022 |
| Eudicotyledons | Cucurbitaceae | <i>Momordica</i>     | <i>Momordica enneaphylla</i>      | GQ163023 |
| Eudicotyledons | Cucurbitaceae | <i>Momordica</i>     | <i>Momordica enneaphylla</i>      | GQ163024 |
| Eudicotyledons | Cucurbitaceae | <i>Momordica</i>     | <i>Momordica enneaphylla</i>      | GQ163025 |
| Eudicotyledons | Cucurbitaceae | <i>Momordica</i>     | <i>Momordica enneaphylla</i>      | GQ163026 |
| Eudicotyledons | Cucurbitaceae | <i>Momordica</i>     | <i>Momordica enneaphylla</i>      | GQ163027 |
| Eudicotyledons | Cucurbitaceae | <i>Momordica</i>     | <i>Momordica enneaphylla</i>      | GQ163028 |
| Eudicotyledons | Cucurbitaceae | <i>Momordica</i>     | <i>Momordica friesiorum</i>       | GQ163033 |
| Eudicotyledons | Cucurbitaceae | <i>Momordica</i>     | <i>Momordica friesiorum</i>       | GQ163034 |
| Eudicotyledons | Cucurbitaceae | <i>Momordica</i>     | <i>Momordica glabra</i>           | GQ163036 |
| Eudicotyledons | Cucurbitaceae | <i>Momordica</i>     | <i>Momordica glabra</i>           | GQ163037 |
| Eudicotyledons | Cucurbitaceae | <i>Momordica</i>     | <i>Momordica henriquesii</i>      | GQ163038 |
| Eudicotyledons | Cucurbitaceae | <i>Momordica</i>     | <i>Momordica henriquesii</i>      | GQ163039 |
| Eudicotyledons | Cucurbitaceae | <i>Momordica</i>     | <i>Momordica humilis</i>          | GQ163040 |
| Eudicotyledons | Cucurbitaceae | <i>Momordica</i>     | <i>Momordica humilis</i>          | GQ163041 |
| Eudicotyledons | Cucurbitaceae | <i>Momordica</i>     | <i>Momordica macrophylla</i>      | GQ163049 |
| Eudicotyledons | Cucurbitaceae | <i>Momordica</i>     | <i>Momordica macrophylla</i>      | GQ163050 |
| Eudicotyledons | Cucurbitaceae | <i>Momordica</i>     | <i>Momordica multiflora</i>       | GQ163052 |
| Eudicotyledons | Cucurbitaceae | <i>Momordica</i>     | <i>Momordica multiflora</i>       | GQ163053 |
| Eudicotyledons | Cucurbitaceae | <i>Momordica</i>     | <i>Momordica multiflora</i>       | GQ163054 |
| Eudicotyledons | Cucurbitaceae | <i>Momordica</i>     | <i>Momordica parvifolia</i>       | GQ163058 |
| Eudicotyledons | Cucurbitaceae | <i>Momordica</i>     | <i>Momordica parvifolia</i>       | GQ163059 |
| Eudicotyledons | Cucurbitaceae | <i>Momordica</i>     | <i>Momordica parvifolia</i>       | GQ163060 |

|                |                 |                  |                                                  |          |
|----------------|-----------------|------------------|--------------------------------------------------|----------|
| Eudicotyledons | Cucurbitaceae   | <i>Momordica</i> | <i>Momordica parvifolia</i>                      | GQ163061 |
| Eudicotyledons | Cucurbitaceae   | <i>Momordica</i> | <i>Momordica pterocarpa</i>                      | GQ163063 |
| Eudicotyledons | Cucurbitaceae   | <i>Momordica</i> | <i>Momordica pterocarpa</i>                      | GQ163064 |
| Eudicotyledons | Cucurbitaceae   | <i>Momordica</i> | <i>Momordica rostrata</i>                        | GQ163070 |
| Eudicotyledons | Cucurbitaceae   | <i>Momordica</i> | <i>Momordica rostrata</i>                        | GQ163071 |
| Eudicotyledons | Cucurbitaceae   | <i>Momordica</i> | <i>Momordica sessilifolia</i>                    | GQ163072 |
| Eudicotyledons | Cucurbitaceae   | <i>Momordica</i> | <i>Momordica sessilifolia</i>                    | GQ163073 |
| Eudicotyledons | Cucurbitaceae   | <i>Momordica</i> | <i>Momordica sphaeroidea</i>                     | GQ163081 |
| Eudicotyledons | Cucurbitaceae   | <i>Momordica</i> | <i>Momordica sphaeroidea</i>                     | GQ163082 |
| Eudicotyledons | Cucurbitaceae   | <i>Momordica</i> | <i>Momordica sphaeroidea</i>                     | GQ163083 |
| Eudicotyledons | Cucurbitaceae   | <i>Momordica</i> | <i>Momordica subangulata</i>                     | GQ163085 |
| Eudicotyledons | Cucurbitaceae   | <i>Momordica</i> | <i>Momordica subangulata</i>                     | GQ163086 |
| Eudicotyledons | Cucurbitaceae   | <i>Momordica</i> | <i>Momordica subangulata</i>                     | GQ163087 |
| Eudicotyledons | Cucurbitaceae   | <i>Momordica</i> | <i>Momordica trifoliolata</i>                    | GQ163090 |
| Eudicotyledons | Cucurbitaceae   | <i>Momordica</i> | <i>Momordica trifoliolata</i>                    | GQ163091 |
| Eudicotyledons | Salicaceae      | <i>Salix</i>     | <i>Salix alba x Salix pentandra</i>              | GU373308 |
| Eudicotyledons | Salicaceae      | <i>Salix</i>     | <i>Salix alba x Salix pentandra</i>              | GU373309 |
| Eudicotyledons | Salicaceae      | <i>Salix</i>     | <i>Salix aurita x Salix myrtilloides</i>         | GU373315 |
| Eudicotyledons | Salicaceae      | <i>Salix</i>     | <i>Salix aurita x Salix myrtilloides</i>         | GU373323 |
| Eudicotyledons | Salicaceae      | <i>Salix</i>     | <i>Salix aurita x Salix repens subsp. repens</i> | GU373316 |
| Eudicotyledons | Salicaceae      | <i>Salix</i>     | <i>Salix aurita x Salix repens subsp. repens</i> | GU373317 |
| Eudicotyledons | Salicaceae      | <i>Salix</i>     | <i>Salix myrsinifolia x Salix phylicifolia</i>   | GU373319 |
| Eudicotyledons | Salicaceae      | <i>Salix</i>     | <i>Salix myrsinifolia x Salix phylicifolia</i>   | GU373320 |
| Eudicotyledons | Solanaceae      | <i>Solanum</i>   | <i>Solanum anceps</i>                            | HQ856107 |
| Eudicotyledons | Solanaceae      | <i>Solanum</i>   | <i>Solanum anceps</i>                            | HQ856108 |
| Eudicotyledons | Caryophyllaceae | <i>Dianthus</i>  | <i>Dianthus broteri</i>                          | GU441012 |
| Eudicotyledons | Caryophyllaceae | <i>Dianthus</i>  | <i>Dianthus broteri</i>                          | GU574182 |
| Eudicotyledons | Caryophyllaceae | <i>Dianthus</i>  | <i>Dianthus broteri</i>                          | GU574183 |
| Eudicotyledons | Caryophyllaceae | <i>Dianthus</i>  | <i>Dianthus broteri</i>                          | GU574184 |
| Eudicotyledons | Caryophyllaceae | <i>Dianthus</i>  | <i>Dianthus broteri</i>                          | GU574185 |
| Eudicotyledons | Caryophyllaceae | <i>Dianthus</i>  | <i>Dianthus broteri</i>                          | GU574186 |
| Eudicotyledons | Caryophyllaceae | <i>Dianthus</i>  | <i>Dianthus broteri</i>                          | GU574187 |
| Eudicotyledons | Caryophyllaceae | <i>Dianthus</i>  | <i>Dianthus broteri</i>                          | GU070815 |
| Eudicotyledons | Caryophyllaceae | <i>Dianthus</i>  | <i>Dianthus broteri</i>                          | GU070816 |
| Eudicotyledons | Caryophyllaceae | <i>Dianthus</i>  | <i>Dianthus broteri</i>                          | GU070819 |
| Eudicotyledons | Caryophyllaceae | <i>Dianthus</i>  | <i>Dianthus broteri</i>                          | GU070820 |
| Eudicotyledons | Caryophyllaceae | <i>Dianthus</i>  | <i>Dianthus broteri</i>                          | GU070821 |
| Eudicotyledons | Caryophyllaceae | <i>Dianthus</i>  | <i>Dianthus broteri</i>                          | GU070822 |
| Eudicotyledons | Caryophyllaceae | <i>Dianthus</i>  | <i>Dianthus broteri</i>                          | GU070823 |
| Eudicotyledons | Caryophyllaceae | <i>Dianthus</i>  | <i>Dianthus broteri</i>                          | GU070825 |
| Eudicotyledons | Caryophyllaceae | <i>Dianthus</i>  | <i>Dianthus broteri</i>                          | GU070826 |
| Eudicotyledons | Caryophyllaceae | <i>Dianthus</i>  | <i>Dianthus broteri</i>                          | GU070827 |
| Eudicotyledons | Caryophyllaceae | <i>Dianthus</i>  | <i>Dianthus broteri</i>                          | GU070828 |
| Eudicotyledons | Caryophyllaceae | <i>Dianthus</i>  | <i>Dianthus broteri</i>                          | GU070829 |
| Eudicotyledons | Caryophyllaceae | <i>Dianthus</i>  | <i>Dianthus broteri</i>                          | GU070830 |
| Eudicotyledons | Caryophyllaceae | <i>Dianthus</i>  | <i>Dianthus broteri</i>                          | GU070831 |
| Eudicotyledons | Caryophyllaceae | <i>Dianthus</i>  | <i>Dianthus broteri</i>                          | GU070832 |
| Eudicotyledons | Caryophyllaceae | <i>Dianthus</i>  | <i>Dianthus broteri</i>                          | GU070833 |
| Eudicotyledons | Caryophyllaceae | <i>Dianthus</i>  | <i>Dianthus broteri</i>                          | GU070835 |
| Eudicotyledons | Caryophyllaceae | <i>Dianthus</i>  | <i>Dianthus broteri</i>                          | GU070836 |
| Eudicotyledons | Caryophyllaceae | <i>Dianthus</i>  | <i>Dianthus broteri</i>                          | GU070837 |
| Eudicotyledons | Caryophyllaceae | <i>Dianthus</i>  | <i>Dianthus broteri</i>                          | GU070838 |
| Eudicotyledons | Caryophyllaceae | <i>Dianthus</i>  | <i>Dianthus broteri</i>                          | GU070839 |

|                |                 |                  |                              |          |
|----------------|-----------------|------------------|------------------------------|----------|
| Eudicotyledons | Solanaceae      | <i>Solanum</i>   | <i>Solanum delagoense</i>    | HM016422 |
| Eudicotyledons | Solanaceae      | <i>Solanum</i>   | <i>Solanum delagoense</i>    | HM016423 |
| Eudicotyledons | Caryophyllaceae | <i>Dianthus</i>  | <i>Dianthus caespitosus</i>  | GU441013 |
| Eudicotyledons | Caryophyllaceae | <i>Dianthus</i>  | <i>Dianthus caespitosus</i>  | GU441014 |
| Eudicotyledons | Caryophyllaceae | <i>Dianthus</i>  | <i>Dianthus diffusus</i>     | GU441036 |
| Eudicotyledons | Caryophyllaceae | <i>Dianthus</i>  | <i>Dianthus diffusus</i>     | GU441037 |
| Eudicotyledons | Caryophyllaceae | <i>Dianthus</i>  | <i>Dianthus giganteus</i>    | GU441043 |
| Eudicotyledons | Caryophyllaceae | <i>Dianthus</i>  | <i>Dianthus giganteus</i>    | GU441044 |
| Eudicotyledons | Caryophyllaceae | <i>Dianthus</i>  | <i>Dianthus lusitanus</i>    | GU441060 |
| Eudicotyledons | Caryophyllaceae | <i>Dianthus</i>  | <i>Dianthus lusitanus</i>    | GU441061 |
| Eudicotyledons | Caryophyllaceae | <i>Dianthus</i>  | <i>Dianthus serrulatus</i>   | GU441083 |
| Eudicotyledons | Caryophyllaceae | <i>Dianthus</i>  | <i>Dianthus serrulatus</i>   | GU441084 |
| Eudicotyledons | Vitaceae        | <i>Vitis</i>     | <i>Vitis girdiana</i>        | HQ108270 |
| Eudicotyledons | Vitaceae        | <i>Vitis</i>     | <i>Vitis girdiana</i>        | HQ656406 |
| Eudicotyledons | Vitaceae        | <i>Vitis</i>     | <i>Vitis vulpina</i>         | JQ182523 |
| Eudicotyledons | Vitaceae        | <i>Vitis</i>     | <i>Vitis vulpina</i>         | HQ656416 |
| Eudicotyledons | Vitaceae        | <i>Vitis</i>     | <i>Vitis vulpina</i>         | HQ656429 |
| Eudicotyledons | Oleaceae        | <i>Fraxinus</i>  | <i>Fraxinus holotricha</i>   | HM367438 |
| Eudicotyledons | Oleaceae        | <i>Fraxinus</i>  | <i>Fraxinus holotricha</i>   | HM367439 |
| Eudicotyledons | Oleaceae        | <i>Fraxinus</i>  | <i>Fraxinus holotricha</i>   | HM367440 |
| Eudicotyledons | Oleaceae        | <i>Fraxinus</i>  | <i>Fraxinus holotricha</i>   | HM367441 |
| Eudicotyledons | Oleaceae        | <i>Fraxinus</i>  | <i>Fraxinus profunda</i>     | HM367525 |
| Eudicotyledons | Oleaceae        | <i>Fraxinus</i>  | <i>Fraxinus profunda</i>     | HM367526 |
| Eudicotyledons | Oleaceae        | <i>Fraxinus</i>  | <i>Fraxinus profunda</i>     | HM367527 |
| Eudicotyledons | Oleaceae        | <i>Fraxinus</i>  | <i>Fraxinus profunda</i>     | HM367528 |
| Eudicotyledons | Oleaceae        | <i>Fraxinus</i>  | <i>Fraxinus profunda</i>     | HM367529 |
| Eudicotyledons | Asteraceae      | <i>Santolina</i> | <i>Santolina insularis</i>   | JF345741 |
| Eudicotyledons | Asteraceae      | <i>Santolina</i> | <i>Santolina insularis</i>   | JF345750 |
| Eudicotyledons | Burseraceae     | <i>Bursera</i>   | <i>Bursera itzae</i>         | GQ377886 |
| Eudicotyledons | Burseraceae     | <i>Bursera</i>   | <i>Bursera itzae</i>         | GQ377887 |
| Eudicotyledons | Burseraceae     | <i>Bursera</i>   | <i>Bursera ovalifolia</i>    | GQ377894 |
| Eudicotyledons | Burseraceae     | <i>Bursera</i>   | <i>Bursera ovalifolia</i>    | GQ377895 |
| Eudicotyledons | Burseraceae     | <i>Bursera</i>   | <i>Bursera ovalifolia</i>    | JF919200 |
| Eudicotyledons | Burseraceae     | <i>Bursera</i>   | <i>Bursera roseana</i>       | GQ377899 |
| Eudicotyledons | Burseraceae     | <i>Bursera</i>   | <i>Bursera roseana</i>       | GQ377900 |
| Eudicotyledons | Burseraceae     | <i>Bursera</i>   | <i>Bursera shaferi</i>       | GQ377928 |
| Eudicotyledons | Burseraceae     | <i>Bursera</i>   | <i>Bursera shaferi</i>       | GQ377929 |
| Eudicotyledons | Celastraceae    | <i>Parnassia</i> | <i>Parnassia mysorensis</i>  | JF802352 |
| Eudicotyledons | Celastraceae    | <i>Parnassia</i> | <i>Parnassia mysorensis</i>  | JF802353 |
| Eudicotyledons | Celastraceae    | <i>Parnassia</i> | <i>Parnassia mysorensis</i>  | JF802354 |
| Eudicotyledons | Celastraceae    | <i>Parnassia</i> | <i>Parnassia mysorensis</i>  | JF802355 |
| Eudicotyledons | Celastraceae    | <i>Parnassia</i> | <i>Parnassia mysorensis</i>  | JF802356 |
| Eudicotyledons | Celastraceae    | <i>Parnassia</i> | <i>Parnassia mysorensis</i>  | JN045834 |
| Eudicotyledons | Celastraceae    | <i>Parnassia</i> | <i>Parnassia mysorensis</i>  | JN045835 |
| Eudicotyledons | Celastraceae    | <i>Parnassia</i> | <i>Parnassia mysorensis</i>  | JN045836 |
| Eudicotyledons | Celastraceae    | <i>Parnassia</i> | <i>Parnassia mysorensis</i>  | JN045837 |
| Eudicotyledons | Oleaceae        | <i>Fraxinus</i>  | <i>Fraxinus retusa</i>       | HM367534 |
| Eudicotyledons | Oleaceae        | <i>Fraxinus</i>  | <i>Fraxinus retusa</i>       | HM367535 |
| Eudicotyledons | Oleaceae        | <i>Fraxinus</i>  | <i>Fraxinus griffithii</i>   | HM367434 |
| Eudicotyledons | Oleaceae        | <i>Fraxinus</i>  | <i>Fraxinus griffithii</i>   | HM367435 |
| Eudicotyledons | Oleaceae        | <i>Fraxinus</i>  | <i>Fraxinus griffithii</i>   | HM367436 |
| Eudicotyledons | Oleaceae        | <i>Fraxinus</i>  | <i>Fraxinus malacophylla</i> | HM367485 |
| Eudicotyledons | Oleaceae        | <i>Fraxinus</i>  | <i>Fraxinus malacophylla</i> | HM367486 |

|                |                |                     |                                 |          |
|----------------|----------------|---------------------|---------------------------------|----------|
| Eudicotyledons | Vitaceae       | <i>Vitis</i>        | <i>Vitis romanetii</i>          | HQ108318 |
| Eudicotyledons | Vitaceae       | <i>Vitis</i>        | <i>Vitis romanetii</i>          | HQ656446 |
| Eudicotyledons | Myrtaceae      | <i>Myrcia</i>       | <i>Myrcia splendens</i>         | JN091433 |
| Eudicotyledons | Myrtaceae      | <i>Myrcia</i>       | <i>Myrcia splendens</i>         | JN091434 |
| Eudicotyledons | Myrtaceae      | <i>Myrcia</i>       | <i>Myrcia splendens</i>         | HM446970 |
| Eudicotyledons | Vitaceae       | <i>Vitis</i>        | <i>Vitis x doaniana</i>         | HQ108272 |
| Eudicotyledons | Vitaceae       | <i>Vitis</i>        | <i>Vitis x doaniana</i>         | HQ108273 |
| Eudicotyledons | Vitaceae       | <i>Vitis</i>        | <i>Vitis balansana</i>          | HQ108310 |
| Eudicotyledons | Vitaceae       | <i>Vitis</i>        | <i>Vitis balansana</i>          | HQ656443 |
| Eudicotyledons | Vitaceae       | <i>Vitis</i>        | <i>Vitis balansana</i>          | HQ656458 |
| Eudicotyledons | Vitaceae       | <i>Vitis</i>        | <i>Vitis balansana</i>          | HQ656459 |
| Eudicotyledons | Lamiaceae      | <i>Ocimum</i>       | <i>Ocimum sp. MIB zpl</i>       | FR726111 |
| Eudicotyledons | Lamiaceae      | <i>Ocimum</i>       | <i>Ocimum sp. MIB zpl</i>       | FR726112 |
| Eudicotyledons | Lamiaceae      | <i>Ocimum</i>       | <i>Ocimum sp. MIB zpl</i>       | FR726113 |
| Eudicotyledons | Lamiaceae      | <i>Origanum</i>     | <i>Origanum sp. MIB zpl(1)</i>  | FR726126 |
| Eudicotyledons | Lamiaceae      | <i>Origanum</i>     | <i>Origanum sp. MIB zpl(1)</i>  | FR726127 |
| Eudicotyledons | Lamiaceae      | <i>Origanum</i>     | <i>Origanum sp. MIB zpl(1)</i>  | FR726128 |
| Eudicotyledons | Lamiaceae      | <i>Rosmarinus</i>   | <i>Rosmarinus sp. MIB zpl</i>   | FR726157 |
| Eudicotyledons | Lamiaceae      | <i>Rosmarinus</i>   | <i>Rosmarinus sp. MIB zpl</i>   | FR726158 |
| Eudicotyledons | Lamiaceae      | <i>Rosmarinus</i>   | <i>Rosmarinus sp. MIB zpl</i>   | FR726159 |
| Eudicotyledons | Lamiaceae      | <i>Origanum</i>     | <i>Origanum sp. MIB zpl(2)</i>  | FR726134 |
| Eudicotyledons | Lamiaceae      | <i>Origanum</i>     | <i>Origanum sp. MIB zpl(2)</i>  | FR726135 |
| Eudicotyledons | Lamiaceae      | <i>Origanum</i>     | <i>Origanum sp. MIB zpl(2)</i>  | FR726136 |
| Eudicotyledons | Amaranthaceae  | <i>Chenopodium</i>  | <i>Chenopodium simplex</i>      | HQ596640 |
| Eudicotyledons | Amaranthaceae  | <i>Chenopodium</i>  | <i>Chenopodium simplex</i>      | HQ596641 |
| Eudicotyledons | Ericaceae      | <i>Rhododendron</i> | <i>Rhododendron emarginatum</i> | JN046803 |
| Eudicotyledons | Ericaceae      | <i>Rhododendron</i> | <i>Rhododendron emarginatum</i> | JN046804 |
| Eudicotyledons | Ericaceae      | <i>Rhododendron</i> | <i>Rhododendron emarginatum</i> | JN046805 |
| Eudicotyledons | Brassicaceae   | <i>Capsella</i>     | <i>Capsella orientalis</i>      | FR822347 |
| Eudicotyledons | Brassicaceae   | <i>Capsella</i>     | <i>Capsella orientalis</i>      | FR822348 |
| Eudicotyledons | Brassicaceae   | <i>Capsella</i>     | <i>Capsella orientalis</i>      | FR822349 |
| Eudicotyledons | Plantaginaceae | <i>Veronica</i>     | <i>Veronica barrelieri</i>      | HQ327851 |
| Eudicotyledons | Plantaginaceae | <i>Veronica</i>     | <i>Veronica barrelieri</i>      | HQ327852 |
| Eudicotyledons | Plantaginaceae | <i>Veronica</i>     | <i>Veronica barrelieri</i>      | HQ327861 |
| Eudicotyledons | Plantaginaceae | <i>Veronica</i>     | <i>Veronica barrelieri</i>      | HQ327862 |
| Eudicotyledons | Plantaginaceae | <i>Veronica</i>     | <i>Veronica barrelieri</i>      | HQ327875 |
| Eudicotyledons | Plantaginaceae | <i>Veronica</i>     | <i>Veronica barrelieri</i>      | HQ327876 |
| Eudicotyledons | Plantaginaceae | <i>Veronica</i>     | <i>Veronica barrelieri</i>      | HQ327899 |
| Eudicotyledons | Plantaginaceae | <i>Veronica</i>     | <i>Veronica barrelieri</i>      | HQ327900 |
| Eudicotyledons | Aquifoliaceae  | <i>Ilex</i>         | <i>Ilex kaushue</i>             | JN044944 |
| Eudicotyledons | Aquifoliaceae  | <i>Ilex</i>         | <i>Ilex kaushue</i>             | JN044945 |
| Eudicotyledons | Aquifoliaceae  | <i>Ilex</i>         | <i>Ilex kaushue</i>             | JN044946 |
| Eudicotyledons | Aquifoliaceae  | <i>Ilex</i>         | <i>Ilex pentagona</i>           | JN044951 |
| Eudicotyledons | Aquifoliaceae  | <i>Ilex</i>         | <i>Ilex pentagona</i>           | JN044952 |
| Eudicotyledons | Aquifoliaceae  | <i>Ilex</i>         | <i>Ilex pentagona</i>           | JN044953 |
| Eudicotyledons | Vitaceae       | <i>Vitis</i>        | <i>Vitis lawsonii</i>           | HM585736 |
| Eudicotyledons | Vitaceae       | <i>Vitis</i>        | <i>Vitis lawsonii</i>           | HM585737 |
| Eudicotyledons | Celastraceae   | <i>Euonymus</i>     | <i>Euonymus nitidus</i>         | HQ415545 |
| Eudicotyledons | Celastraceae   | <i>Euonymus</i>     | <i>Euonymus nitidus</i>         | HQ427091 |
| Eudicotyledons | Convolvulaceae | <i>Convolvulus</i>  | <i>Convolvulus valentinus</i>   | HQ616177 |
| Eudicotyledons | Convolvulaceae | <i>Convolvulus</i>  | <i>Convolvulus valentinus</i>   | HQ616178 |
| Eudicotyledons | Convolvulaceae | <i>Convolvulus</i>  | <i>Convolvulus valentinus</i>   | HQ616179 |
| Eudicotyledons | Convolvulaceae | <i>Convolvulus</i>  | <i>Convolvulus valentinus</i>   | HQ616183 |

|                |                |                    |                               |          |
|----------------|----------------|--------------------|-------------------------------|----------|
| Eudicotyledons | Convolvulaceae | <i>Convolvulus</i> | <i>Convolvulus valentinus</i> | HQ616184 |
| Eudicotyledons | Convolvulaceae | <i>Convolvulus</i> | <i>Convolvulus valentinus</i> | HQ616185 |
| Eudicotyledons | Convolvulaceae | <i>Convolvulus</i> | <i>Convolvulus valentinus</i> | HQ616186 |
| Eudicotyledons | Convolvulaceae | <i>Convolvulus</i> | <i>Convolvulus valentinus</i> | HQ616187 |
| Eudicotyledons | Convolvulaceae | <i>Convolvulus</i> | <i>Convolvulus valentinus</i> | HQ616188 |
| Eudicotyledons | Convolvulaceae | <i>Convolvulus</i> | <i>Convolvulus valentinus</i> | HQ616189 |
| Eudicotyledons | Convolvulaceae | <i>Convolvulus</i> | <i>Convolvulus valentinus</i> | HQ616190 |
| Eudicotyledons | Convolvulaceae | <i>Convolvulus</i> | <i>Convolvulus valentinus</i> | HQ616205 |
| Eudicotyledons | Convolvulaceae | <i>Convolvulus</i> | <i>Convolvulus valentinus</i> | HQ616206 |
| Eudicotyledons | Celastraceae   | <i>Parnassia</i>   | <i>Parnassia asarifolia</i>   | JF802307 |
| Eudicotyledons | Celastraceae   | <i>Parnassia</i>   | <i>Parnassia asarifolia</i>   | JF802308 |
| Eudicotyledons | Celastraceae   | <i>Parnassia</i>   | <i>Parnassia asarifolia</i>   | JF802309 |
| Eudicotyledons | Celastraceae   | <i>Parnassia</i>   | <i>Parnassia asarifolia</i>   | JN045781 |
| Eudicotyledons | Celastraceae   | <i>Parnassia</i>   | <i>Parnassia asarifolia</i>   | JN045782 |
| Eudicotyledons | Celastraceae   | <i>Parnassia</i>   | <i>Parnassia asarifolia</i>   | JN045783 |
| Eudicotyledons | Celastraceae   | <i>Parnassia</i>   | <i>Parnassia delavayi</i>     | JF795377 |
| Eudicotyledons | Celastraceae   | <i>Parnassia</i>   | <i>Parnassia delavayi</i>     | JF802310 |
| Eudicotyledons | Celastraceae   | <i>Parnassia</i>   | <i>Parnassia delavayi</i>     | JF802311 |
| Eudicotyledons | Celastraceae   | <i>Parnassia</i>   | <i>Parnassia delavayi</i>     | JF802312 |
| Eudicotyledons | Celastraceae   | <i>Parnassia</i>   | <i>Parnassia delavayi</i>     | JF802313 |
| Eudicotyledons | Celastraceae   | <i>Parnassia</i>   | <i>Parnassia delavayi</i>     | JF802314 |
| Eudicotyledons | Celastraceae   | <i>Parnassia</i>   | <i>Parnassia delavayi</i>     | JN045796 |
| Eudicotyledons | Celastraceae   | <i>Parnassia</i>   | <i>Parnassia delavayi</i>     | JN045797 |
| Eudicotyledons | Celastraceae   | <i>Parnassia</i>   | <i>Parnassia delavayi</i>     | JN045798 |
| Eudicotyledons | Celastraceae   | <i>Parnassia</i>   | <i>Parnassia delavayi</i>     | JN045799 |
| Eudicotyledons | Celastraceae   | <i>Parnassia</i>   | <i>Parnassia delavayi</i>     | JN045800 |
| Eudicotyledons | Celastraceae   | <i>Parnassia</i>   | <i>Parnassia degenensis</i>   | JF802315 |
| Eudicotyledons | Celastraceae   | <i>Parnassia</i>   | <i>Parnassia degenensis</i>   | JF802316 |
| Eudicotyledons | Celastraceae   | <i>Parnassia</i>   | <i>Parnassia degenensis</i>   | JN105083 |
| Eudicotyledons | Celastraceae   | <i>Parnassia</i>   | <i>Parnassia dilatata</i>     | JF802317 |
| Eudicotyledons | Celastraceae   | <i>Parnassia</i>   | <i>Parnassia dilatata</i>     | JF802318 |
| Eudicotyledons | Celastraceae   | <i>Parnassia</i>   | <i>Parnassia dilatata</i>     | JF802319 |
| Eudicotyledons | Celastraceae   | <i>Parnassia</i>   | <i>Parnassia dilatata</i>     | JN045801 |
| Eudicotyledons | Celastraceae   | <i>Parnassia</i>   | <i>Parnassia dilatata</i>     | JN045802 |
| Eudicotyledons | Celastraceae   | <i>Parnassia</i>   | <i>Parnassia dilatata</i>     | JN045803 |
| Eudicotyledons | Celastraceae   | <i>Parnassia</i>   | <i>Parnassia epunctulata</i>  | JF802320 |
| Eudicotyledons | Celastraceae   | <i>Parnassia</i>   | <i>Parnassia epunctulata</i>  | JF802321 |
| Eudicotyledons | Celastraceae   | <i>Parnassia</i>   | <i>Parnassia epunctulata</i>  | JN045804 |
| Eudicotyledons | Celastraceae   | <i>Parnassia</i>   | <i>Parnassia epunctulata</i>  | JN045805 |
| Eudicotyledons | Celastraceae   | <i>Parnassia</i>   | <i>Parnassia esquirolii</i>   | JF802322 |
| Eudicotyledons | Celastraceae   | <i>Parnassia</i>   | <i>Parnassia esquirolii</i>   | JF802323 |
| Eudicotyledons | Celastraceae   | <i>Parnassia</i>   | <i>Parnassia farreri</i>      | JF802330 |
| Eudicotyledons | Celastraceae   | <i>Parnassia</i>   | <i>Parnassia farreri</i>      | JF802331 |
| Eudicotyledons | Celastraceae   | <i>Parnassia</i>   | <i>Parnassia farreri</i>      | JF802332 |
| Eudicotyledons | Celastraceae   | <i>Parnassia</i>   | <i>Parnassia farreri</i>      | JN045810 |
| Eudicotyledons | Celastraceae   | <i>Parnassia</i>   | <i>Parnassia farreri</i>      | JN045811 |
| Eudicotyledons | Celastraceae   | <i>Parnassia</i>   | <i>Parnassia farreri</i>      | JN045812 |
| Eudicotyledons | Celastraceae   | <i>Parnassia</i>   | <i>Parnassia foliosa</i>      | JF802333 |
| Eudicotyledons | Celastraceae   | <i>Parnassia</i>   | <i>Parnassia foliosa</i>      | JF802334 |
| Eudicotyledons | Celastraceae   | <i>Parnassia</i>   | <i>Parnassia foliosa</i>      | JF802335 |
| Eudicotyledons | Celastraceae   | <i>Parnassia</i>   | <i>Parnassia foliosa</i>      | JF802336 |
| Eudicotyledons | Celastraceae   | <i>Parnassia</i>   | <i>Parnassia foliosa</i>      | JN045813 |
| Eudicotyledons | Celastraceae   | <i>Parnassia</i>   | <i>Parnassia foliosa</i>      | JN045814 |



|                |              |                  |                                |          |
|----------------|--------------|------------------|--------------------------------|----------|
| Eudicotyledons | Celastraceae | <i>Parnassia</i> | <i>Parnassia foliosa</i>       | JN045815 |
| Eudicotyledons | Celastraceae | <i>Parnassia</i> | <i>Parnassia foliosa</i>       | JN045816 |
| Eudicotyledons | Celastraceae | <i>Parnassia</i> | <i>Parnassia guilinensis</i>   | JF802339 |
| Eudicotyledons | Celastraceae | <i>Parnassia</i> | <i>Parnassia guilinensis</i>   | JF802340 |
| Eudicotyledons | Celastraceae | <i>Parnassia</i> | <i>Parnassia guilinensis</i>   | JF802341 |
| Eudicotyledons | Celastraceae | <i>Parnassia</i> | <i>Parnassia guilinensis</i>   | JN045817 |
| Eudicotyledons | Celastraceae | <i>Parnassia</i> | <i>Parnassia guilinensis</i>   | JN045818 |
| Eudicotyledons | Celastraceae | <i>Parnassia</i> | <i>Parnassia guilinensis</i>   | JN045819 |
| Eudicotyledons | Celastraceae | <i>Parnassia</i> | <i>Parnassia kangdingensis</i> | JF802342 |
| Eudicotyledons | Celastraceae | <i>Parnassia</i> | <i>Parnassia kangdingensis</i> | JF802343 |
| Eudicotyledons | Celastraceae | <i>Parnassia</i> | <i>Parnassia kangdingensis</i> | JN045820 |
| Eudicotyledons | Celastraceae | <i>Parnassia</i> | <i>Parnassia kangdingensis</i> | JN045821 |
| Eudicotyledons | Celastraceae | <i>Parnassia</i> | <i>Parnassia leptophylla</i>   | JF802346 |
| Eudicotyledons | Celastraceae | <i>Parnassia</i> | <i>Parnassia leptophylla</i>   | JF802347 |
| Eudicotyledons | Celastraceae | <i>Parnassia</i> | <i>Parnassia leptophylla</i>   | JN045829 |
| Eudicotyledons | Celastraceae | <i>Parnassia</i> | <i>Parnassia leptophylla</i>   | JN045830 |
| Eudicotyledons | Celastraceae | <i>Parnassia</i> | <i>Parnassia leptophylla</i>   | JN045831 |
| Eudicotyledons | Celastraceae | <i>Parnassia</i> | <i>Parnassia longipetala</i>   | JF802348 |
| Eudicotyledons | Celastraceae | <i>Parnassia</i> | <i>Parnassia longipetala</i>   | JF802349 |
| Eudicotyledons | Celastraceae | <i>Parnassia</i> | <i>Parnassia longipetala</i>   | JN045832 |
| Eudicotyledons | Celastraceae | <i>Parnassia</i> | <i>Parnassia longipetala</i>   | JN045833 |
| Eudicotyledons | Celastraceae | <i>Parnassia</i> | <i>Parnassia lutea</i>         | JF802350 |
| Eudicotyledons | Celastraceae | <i>Parnassia</i> | <i>Parnassia lutea</i>         | JF802351 |
| Eudicotyledons | Celastraceae | <i>Parnassia</i> | <i>Parnassia noemiae</i>       | JN188290 |
| Eudicotyledons | Celastraceae | <i>Parnassia</i> | <i>Parnassia noemiae</i>       | JF802357 |
| Eudicotyledons | Celastraceae | <i>Parnassia</i> | <i>Parnassia noemiae</i>       | JF802358 |
| Eudicotyledons | Celastraceae | <i>Parnassia</i> | <i>Parnassia noemiae</i>       | JF802361 |
| Eudicotyledons | Celastraceae | <i>Parnassia</i> | <i>Parnassia noemiae</i>       | JN045838 |
| Eudicotyledons | Celastraceae | <i>Parnassia</i> | <i>Parnassia noemiae</i>       | JN045839 |
| Eudicotyledons | Celastraceae | <i>Parnassia</i> | <i>Parnassia nubicola</i>      | JF802359 |
| Eudicotyledons | Celastraceae | <i>Parnassia</i> | <i>Parnassia nubicola</i>      | JF802360 |
| Eudicotyledons | Celastraceae | <i>Parnassia</i> | <i>Parnassia nubicola</i>      | JN045840 |
| Eudicotyledons | Celastraceae | <i>Parnassia</i> | <i>Parnassia nubicola</i>      | JN045841 |
| Eudicotyledons | Celastraceae | <i>Parnassia</i> | <i>Parnassia perciliata</i>    | JF802366 |
| Eudicotyledons | Celastraceae | <i>Parnassia</i> | <i>Parnassia perciliata</i>    | JF802367 |
| Eudicotyledons | Celastraceae | <i>Parnassia</i> | <i>Parnassia perciliata</i>    | JF802368 |
| Eudicotyledons | Celastraceae | <i>Parnassia</i> | <i>Parnassia perciliata</i>    | JN045847 |
| Eudicotyledons | Celastraceae | <i>Parnassia</i> | <i>Parnassia perciliata</i>    | JN045848 |
| Eudicotyledons | Celastraceae | <i>Parnassia</i> | <i>Parnassia perciliata</i>    | JN045849 |
| Eudicotyledons | Celastraceae | <i>Parnassia</i> | <i>Parnassia perciliata</i>    | JN045850 |
| Eudicotyledons | Celastraceae | <i>Parnassia</i> | <i>Parnassia perciliata</i>    | JN045851 |
| Eudicotyledons | Celastraceae | <i>Parnassia</i> | <i>Parnassia submysorensis</i> | JF802369 |
| Eudicotyledons | Celastraceae | <i>Parnassia</i> | <i>Parnassia submysorensis</i> | JF802370 |
| Eudicotyledons | Celastraceae | <i>Parnassia</i> | <i>Parnassia venusta</i>       | JF802381 |
| Eudicotyledons | Celastraceae | <i>Parnassia</i> | <i>Parnassia venusta</i>       | JF802382 |
| Eudicotyledons | Celastraceae | <i>Parnassia</i> | <i>Parnassia venusta</i>       | JF802383 |
| Eudicotyledons | Celastraceae | <i>Parnassia</i> | <i>Parnassia venusta</i>       | JN045862 |
| Eudicotyledons | Celastraceae | <i>Parnassia</i> | <i>Parnassia venusta</i>       | JN045863 |
| Eudicotyledons | Celastraceae | <i>Parnassia</i> | <i>Parnassia viridiflora</i>   | JF802384 |
| Eudicotyledons | Celastraceae | <i>Parnassia</i> | <i>Parnassia viridiflora</i>   | JF802385 |
| Eudicotyledons | Celastraceae | <i>Parnassia</i> | <i>Parnassia viridiflora</i>   | JN045864 |
| Eudicotyledons | Celastraceae | <i>Parnassia</i> | <i>Parnassia viridiflora</i>   | JN045865 |
| Eudicotyledons | Celastraceae | <i>Parnassia</i> | <i>Parnassia wightiana</i>     | JF802386 |

|                |               |                  |                                |          |
|----------------|---------------|------------------|--------------------------------|----------|
| Eudicotyledons | Celastraceae  | <i>Parnassia</i> | <i>Parnassia wightiana</i>     | JF802387 |
| Eudicotyledons | Celastraceae  | <i>Parnassia</i> | <i>Parnassia wightiana</i>     | JF802388 |
| Eudicotyledons | Celastraceae  | <i>Parnassia</i> | <i>Parnassia wightiana</i>     | JF802389 |
| Eudicotyledons | Celastraceae  | <i>Parnassia</i> | <i>Parnassia wightiana</i>     | JF802390 |
| Eudicotyledons | Celastraceae  | <i>Parnassia</i> | <i>Parnassia wightiana</i>     | JF802391 |
| Eudicotyledons | Celastraceae  | <i>Parnassia</i> | <i>Parnassia wightiana</i>     | JF802392 |
| Eudicotyledons | Celastraceae  | <i>Parnassia</i> | <i>Parnassia wightiana</i>     | JF802393 |
| Eudicotyledons | Celastraceae  | <i>Parnassia</i> | <i>Parnassia wightiana</i>     | JF802394 |
| Eudicotyledons | Celastraceae  | <i>Parnassia</i> | <i>Parnassia wightiana</i>     | JF802395 |
| Eudicotyledons | Celastraceae  | <i>Parnassia</i> | <i>Parnassia wightiana</i>     | JF802396 |
| Eudicotyledons | Celastraceae  | <i>Parnassia</i> | <i>Parnassia wightiana</i>     | JN045866 |
| Eudicotyledons | Celastraceae  | <i>Parnassia</i> | <i>Parnassia wightiana</i>     | JN045867 |
| Eudicotyledons | Celastraceae  | <i>Parnassia</i> | <i>Parnassia wightiana</i>     | JN045868 |
| Eudicotyledons | Celastraceae  | <i>Parnassia</i> | <i>Parnassia wightiana</i>     | JN045869 |
| Eudicotyledons | Celastraceae  | <i>Parnassia</i> | <i>Parnassia wightiana</i>     | JN045870 |
| Eudicotyledons | Celastraceae  | <i>Parnassia</i> | <i>Parnassia wightiana</i>     | JN045871 |
| Eudicotyledons | Celastraceae  | <i>Parnassia</i> | <i>Parnassia yunnanensis</i>   | JF802397 |
| Eudicotyledons | Celastraceae  | <i>Parnassia</i> | <i>Parnassia yunnanensis</i>   | JF802398 |
| Eudicotyledons | Celastraceae  | <i>Parnassia</i> | <i>Parnassia yunnanensis</i>   | JF802399 |
| Eudicotyledons | Celastraceae  | <i>Parnassia</i> | <i>Parnassia yunnanensis</i>   | JF802400 |
| Eudicotyledons | Celastraceae  | <i>Parnassia</i> | <i>Parnassia yunnanensis</i>   | JF802401 |
| Eudicotyledons | Celastraceae  | <i>Parnassia</i> | <i>Parnassia yunnanensis</i>   | JN045872 |
| Eudicotyledons | Celastraceae  | <i>Parnassia</i> | <i>Parnassia yunnanensis</i>   | JN045873 |
| Eudicotyledons | Celastraceae  | <i>Parnassia</i> | <i>Parnassia yunnanensis</i>   | JN045874 |
| Eudicotyledons | Celastraceae  | <i>Parnassia</i> | <i>Parnassia yunnanensis</i>   | JN045875 |
| Eudicotyledons | Celastraceae  | <i>Parnassia</i> | <i>Parnassia yunnanensis</i>   | JN045876 |
| Eudicotyledons | Aquifoliaceae | <i>Ilex</i>      | <i>Ilex chinensis</i>          | JN044933 |
| Eudicotyledons | Aquifoliaceae | <i>Ilex</i>      | <i>Ilex chinensis</i>          | JN044934 |
| Eudicotyledons | Aquifoliaceae | <i>Ilex</i>      | <i>Ilex chinensis</i>          | JN044935 |
| Eudicotyledons | Aquifoliaceae | <i>Ilex</i>      | <i>Ilex chinensis</i>          | JN044936 |
| Eudicotyledons | Aquifoliaceae | <i>Ilex</i>      | <i>Ilex chinensis</i>          | JN044937 |
| Eudicotyledons | Rubiaceae     | <i>Luculia</i>   | <i>Luculia yunnanensis</i>     | JN045277 |
| Eudicotyledons | Rubiaceae     | <i>Luculia</i>   | <i>Luculia yunnanensis</i>     | JN045278 |
| Eudicotyledons | Rubiaceae     | <i>Luculia</i>   | <i>Luculia yunnanensis</i>     | JN045279 |
| Eudicotyledons | Rubiaceae     | <i>Luculia</i>   | <i>Luculia yunnanensis</i>     | JN045280 |
| Eudicotyledons | Rubiaceae     | <i>Luculia</i>   | <i>Luculia yunnanensis</i>     | JN045281 |
| Eudicotyledons | Rubiaceae     | <i>Morinda</i>   | <i>Morinda badia</i>           | JN045476 |
| Eudicotyledons | Rubiaceae     | <i>Morinda</i>   | <i>Morinda badia</i>           | JN045477 |
| Eudicotyledons | Rubiaceae     | <i>Morinda</i>   | <i>Morinda brevipes</i>        | JN045478 |
| Eudicotyledons | Rubiaceae     | <i>Morinda</i>   | <i>Morinda brevipes</i>        | JN045479 |
| Eudicotyledons | Rubiaceae     | <i>Morinda</i>   | <i>Morinda brevipes</i>        | JN045480 |
| Eudicotyledons | Rubiaceae     | <i>Morinda</i>   | <i>Morinda callicarpifolia</i> | JN045481 |
| Eudicotyledons | Rubiaceae     | <i>Morinda</i>   | <i>Morinda callicarpifolia</i> | JN045482 |
| Eudicotyledons | Rubiaceae     | <i>Morinda</i>   | <i>Morinda hainanensis</i>     | JN045483 |
| Eudicotyledons | Rubiaceae     | <i>Morinda</i>   | <i>Morinda hainanensis</i>     | JN045484 |
| Eudicotyledons | Rubiaceae     | <i>Morinda</i>   | <i>Morinda hainanensis</i>     | JN045485 |
| Eudicotyledons | Rubiaceae     | <i>Mussaenda</i> | <i>Mussaenda divaricata</i>    | JN045500 |
| Eudicotyledons | Rubiaceae     | <i>Mussaenda</i> | <i>Mussaenda divaricata</i>    | JN045501 |
| Eudicotyledons | Rubiaceae     | <i>Mussaenda</i> | <i>Mussaenda divaricata</i>    | JN045502 |
| Eudicotyledons | Rubiaceae     | <i>Mussaenda</i> | <i>Mussaenda esquirolii</i>    | JN045503 |
| Eudicotyledons | Rubiaceae     | <i>Mussaenda</i> | <i>Mussaenda esquirolii</i>    | JN045504 |
| Eudicotyledons | Rubiaceae     | <i>Mussaenda</i> | <i>Mussaenda frondosa</i>      | JN045505 |
| Eudicotyledons | Rubiaceae     | <i>Mussaenda</i> | <i>Mussaenda frondosa</i>      | JN045506 |

|                |               |                    |                                 |          |
|----------------|---------------|--------------------|---------------------------------|----------|
| Eudicotyledons | Rubiaceae     | <i>Mussaenda</i>   | <i>Mussaenda hossei</i>         | JN045507 |
| Eudicotyledons | Rubiaceae     | <i>Mussaenda</i>   | <i>Mussaenda hossei</i>         | JN045508 |
| Eudicotyledons | Rubiaceae     | <i>Mussaenda</i>   | <i>Mussaenda kwangtungensis</i> | JN045509 |
| Eudicotyledons | Rubiaceae     | <i>Mussaenda</i>   | <i>Mussaenda kwangtungensis</i> | JN045510 |
| Eudicotyledons | Rubiaceae     | <i>Mussaenda</i>   | <i>Mussaenda kwangtungensis</i> | JN045511 |
| Eudicotyledons | Rubiaceae     | <i>Mussaenda</i>   | <i>Mussaenda laxiflora</i>      | JN045512 |
| Eudicotyledons | Rubiaceae     | <i>Mussaenda</i>   | <i>Mussaenda laxiflora</i>      | JN045513 |
| Eudicotyledons | Rubiaceae     | <i>Mussaenda</i>   | <i>Mussaenda laxiflora</i>      | JN045514 |
| Eudicotyledons | Rubiaceae     | <i>Mussaenda</i>   | <i>Mussaenda macrophylla</i>    | JN045515 |
| Eudicotyledons | Rubiaceae     | <i>Mussaenda</i>   | <i>Mussaenda macrophylla</i>    | JN045516 |
| Eudicotyledons | Rubiaceae     | <i>Mussaenda</i>   | <i>Mussaenda macrophylla</i>    | JN045517 |
| Eudicotyledons | Rubiaceae     | <i>Mussaenda</i>   | <i>Mussaenda pingbianensis</i>  | JN045518 |
| Eudicotyledons | Rubiaceae     | <i>Mussaenda</i>   | <i>Mussaenda pingbianensis</i>  | JN045519 |
| Eudicotyledons | Rubiaceae     | <i>Mussaenda</i>   | <i>Mussaenda treutleri</i>      | JN045533 |
| Eudicotyledons | Rubiaceae     | <i>Mussaenda</i>   | <i>Mussaenda treutleri</i>      | JN045534 |
| Eudicotyledons | Celastraceae  | <i>Parnassia</i>   | <i>Parnassia brevistyla</i>     | JF795368 |
| Eudicotyledons | Celastraceae  | <i>Parnassia</i>   | <i>Parnassia brevistyla</i>     | JF795369 |
| Eudicotyledons | Celastraceae  | <i>Parnassia</i>   | <i>Parnassia brevistyla</i>     | JF795370 |
| Eudicotyledons | Celastraceae  | <i>Parnassia</i>   | <i>Parnassia brevistyla</i>     | JF795371 |
| Eudicotyledons | Celastraceae  | <i>Parnassia</i>   | <i>Parnassia brevistyla</i>     | JN045786 |
| Eudicotyledons | Celastraceae  | <i>Parnassia</i>   | <i>Parnassia brevistyla</i>     | JN045787 |
| Eudicotyledons | Celastraceae  | <i>Parnassia</i>   | <i>Parnassia brevistyla</i>     | JN045788 |
| Eudicotyledons | Celastraceae  | <i>Parnassia</i>   | <i>Parnassia brevistyla</i>     | JN045789 |
| Eudicotyledons | Celastraceae  | <i>Parnassia</i>   | <i>Parnassia brevistyla</i>     | JN045790 |
| Eudicotyledons | Celastraceae  | <i>Parnassia</i>   | <i>Parnassia cacuminum</i>      | JN045791 |
| Eudicotyledons | Celastraceae  | <i>Parnassia</i>   | <i>Parnassia cacuminum</i>      | JN045792 |
| Eudicotyledons | Celastraceae  | <i>Parnassia</i>   | <i>Parnassia chinensis</i>      | JF795372 |
| Eudicotyledons | Celastraceae  | <i>Parnassia</i>   | <i>Parnassia chinensis</i>      | JF795373 |
| Eudicotyledons | Celastraceae  | <i>Parnassia</i>   | <i>Parnassia chinensis</i>      | JF795374 |
| Eudicotyledons | Celastraceae  | <i>Parnassia</i>   | <i>Parnassia chinensis</i>      | JF795375 |
| Eudicotyledons | Celastraceae  | <i>Parnassia</i>   | <i>Parnassia chinensis</i>      | JF795376 |
| Eudicotyledons | Celastraceae  | <i>Parnassia</i>   | <i>Parnassia chinensis</i>      | JN045793 |
| Eudicotyledons | Celastraceae  | <i>Parnassia</i>   | <i>Parnassia chinensis</i>      | JN045794 |
| Eudicotyledons | Celastraceae  | <i>Parnassia</i>   | <i>Parnassia chinensis</i>      | JN045795 |
| Eudicotyledons | Orobanchaceae | <i>Pedicularis</i> | <i>Pedicularis alopecuros</i>   | JN045880 |
| Eudicotyledons | Orobanchaceae | <i>Pedicularis</i> | <i>Pedicularis alopecuros</i>   | JN045881 |
| Eudicotyledons | Orobanchaceae | <i>Pedicularis</i> | <i>Pedicularis alopecuros</i>   | JN045882 |
| Eudicotyledons | Orobanchaceae | <i>Pedicularis</i> | <i>Pedicularis alopecuros</i>   | JN045883 |
| Eudicotyledons | Orobanchaceae | <i>Pedicularis</i> | <i>Pedicularis alopecuros</i>   | JN045884 |
| Eudicotyledons | Orobanchaceae | <i>Pedicularis</i> | <i>Pedicularis alopecuros</i>   | JN045885 |
| Eudicotyledons | Orobanchaceae | <i>Pedicularis</i> | <i>Pedicularis amplituba</i>    | JN045886 |
| Eudicotyledons | Orobanchaceae | <i>Pedicularis</i> | <i>Pedicularis amplituba</i>    | JN045887 |
| Eudicotyledons | Orobanchaceae | <i>Pedicularis</i> | <i>Pedicularis batangensis</i>  | JN045897 |
| Eudicotyledons | Orobanchaceae | <i>Pedicularis</i> | <i>Pedicularis batangensis</i>  | JN045898 |
| Eudicotyledons | Orobanchaceae | <i>Pedicularis</i> | <i>Pedicularis batangensis</i>  | JN045899 |
| Eudicotyledons | Orobanchaceae | <i>Pedicularis</i> | <i>Pedicularis batangensis</i>  | JN045900 |
| Eudicotyledons | Orobanchaceae | <i>Pedicularis</i> | <i>Pedicularis cephalantha</i>  | JN045905 |
| Eudicotyledons | Orobanchaceae | <i>Pedicularis</i> | <i>Pedicularis cephalantha</i>  | JN045906 |
| Eudicotyledons | Orobanchaceae | <i>Pedicularis</i> | <i>Pedicularis cephalantha</i>  | JN045907 |
| Eudicotyledons | Orobanchaceae | <i>Pedicularis</i> | <i>Pedicularis cephalantha</i>  | JN045908 |
| Eudicotyledons | Orobanchaceae | <i>Pedicularis</i> | <i>Pedicularis cephalantha</i>  | JN045909 |
| Eudicotyledons | Orobanchaceae | <i>Pedicularis</i> | <i>Pedicularis cephalantha</i>  | JN045910 |
| Eudicotyledons | Orobanchaceae | <i>Pedicularis</i> | <i>Pedicularis clarkei</i>      | JN045913 |









|                |                 |                     |                                 |          |
|----------------|-----------------|---------------------|---------------------------------|----------|
| Eudicotyledons | Ericaceae       | <i>Rhododendron</i> | <i>Rhododendron yunnanense</i>  | JN047028 |
| Eudicotyledons | Ericaceae       | <i>Rhododendron</i> | <i>Rhododendron yunnanense</i>  | JN047029 |
| Eudicotyledons | Polygonaceae    | <i>Rumex</i>        | <i>Rumex pamiricus</i>          | JN047053 |
| Eudicotyledons | Polygonaceae    | <i>Rumex</i>        | <i>Rumex pamiricus</i>          | JN047054 |
| Eudicotyledons | Adoxaceae       | <i>Sambucus</i>     | <i>Sambucus chinensis</i>       | JN047069 |
| Eudicotyledons | Adoxaceae       | <i>Sambucus</i>     | <i>Sambucus chinensis</i>       | JN047070 |
| Eudicotyledons | Adoxaceae       | <i>Sambucus</i>     | <i>Sambucus chinensis</i>       | JN047071 |
| Eudicotyledons | Adoxaceae       | <i>Sambucus</i>     | <i>Sambucus chinensis</i>       | JN047072 |
| Eudicotyledons | Adoxaceae       | <i>Sambucus</i>     | <i>Sambucus chinensis</i>       | JN047073 |
| Eudicotyledons | Adoxaceae       | <i>Sambucus</i>     | <i>Sambucus chinensis</i>       | JN047074 |
| Eudicotyledons | Adoxaceae       | <i>Sambucus</i>     | <i>Sambucus chinensis</i>       | JN047075 |
| Eudicotyledons | Adoxaceae       | <i>Sambucus</i>     | <i>Sambucus chinensis</i>       | JN047076 |
| Eudicotyledons | Adoxaceae       | <i>Sambucus</i>     | <i>Sambucus chinensis</i>       | JN047077 |
| Eudicotyledons | Adoxaceae       | <i>Sambucus</i>     | <i>Sambucus chinensis</i>       | JN047078 |
| Eudicotyledons | Adoxaceae       | <i>Sambucus</i>     | <i>Sambucus chinensis</i>       | JN047079 |
| Eudicotyledons | Caryophyllaceae | <i>Silene</i>       | <i>Silene firma</i>             | JN047118 |
| Eudicotyledons | Caryophyllaceae | <i>Silene</i>       | <i>Silene firma</i>             | JN047119 |
| Eudicotyledons | Caryophyllaceae | <i>Silene</i>       | <i>Silene firma</i>             | JN047120 |
| Eudicotyledons | Solanaceae      | <i>Solanum</i>      | <i>Solanum pittosporifolium</i> | JN047226 |
| Eudicotyledons | Solanaceae      | <i>Solanum</i>      | <i>Solanum pittosporifolium</i> | JN047227 |
| Eudicotyledons | Solanaceae      | <i>Solanum</i>      | <i>Solanum spirale</i>          | JN047228 |
| Eudicotyledons | Solanaceae      | <i>Solanum</i>      | <i>Solanum spirale</i>          | JN047229 |
| Eudicotyledons | Adoxaceae       | <i>Viburnum</i>     | <i>Viburnum fordiae</i>         | JN047517 |
| Eudicotyledons | Adoxaceae       | <i>Viburnum</i>     | <i>Viburnum fordiae</i>         | JN047518 |
| Eudicotyledons | Adoxaceae       | <i>Viburnum</i>     | <i>Viburnum fordiae</i>         | JN047519 |
| Eudicotyledons | Adoxaceae       | <i>Viburnum</i>     | <i>Viburnum fordiae</i>         | JN047520 |
| Eudicotyledons | Adoxaceae       | <i>Viburnum</i>     | <i>Viburnum fordiae</i>         | JN047521 |
| Eudicotyledons | Adoxaceae       | <i>Viburnum</i>     | <i>Viburnum fordiae</i>         | JN047522 |
| Eudicotyledons | Begoniaceae     | <i>Begonia</i>      | <i>Begonia biflora</i>          | JN044009 |
| Eudicotyledons | Begoniaceae     | <i>Begonia</i>      | <i>Begonia biflora</i>          | JN044010 |
| Eudicotyledons | Begoniaceae     | <i>Begonia</i>      | <i>Begonia biflora</i>          | JN044011 |
| Eudicotyledons | Begoniaceae     | <i>Begonia</i>      | <i>Begonia biflora</i>          | JN044012 |
| Eudicotyledons | Begoniaceae     | <i>Begonia</i>      | <i>Begonia biflora</i>          | JN044013 |
| Eudicotyledons | Begoniaceae     | <i>Begonia</i>      | <i>Begonia biflora</i>          | JN044014 |
| Eudicotyledons | Begoniaceae     | <i>Begonia</i>      | <i>Begonia biflora</i>          | JN044015 |
| Eudicotyledons | Begoniaceae     | <i>Begonia</i>      | <i>Begonia biflora</i>          | JN044016 |
| Eudicotyledons | Begoniaceae     | <i>Begonia</i>      | <i>Begonia crystallina</i>      | JN044019 |
| Eudicotyledons | Begoniaceae     | <i>Begonia</i>      | <i>Begonia crystallina</i>      | JN044020 |
| Eudicotyledons | Begoniaceae     | <i>Begonia</i>      | <i>Begonia crystallina</i>      | JN044021 |
| Eudicotyledons | Begoniaceae     | <i>Begonia</i>      | <i>Begonia crystallina</i>      | JN044022 |
| Eudicotyledons | Begoniaceae     | <i>Begonia</i>      | <i>Begonia crystallina</i>      | JN044023 |
| Eudicotyledons | Begoniaceae     | <i>Begonia</i>      | <i>Begonia crystallina</i>      | JN044024 |
| Eudicotyledons | Begoniaceae     | <i>Begonia</i>      | <i>Begonia crystallina</i>      | JN044025 |
| Eudicotyledons | Begoniaceae     | <i>Begonia</i>      | <i>Begonia cucurbitifolia</i>   | JN044026 |
| Eudicotyledons | Begoniaceae     | <i>Begonia</i>      | <i>Begonia cucurbitifolia</i>   | JN044027 |
| Eudicotyledons | Begoniaceae     | <i>Begonia</i>      | <i>Begonia cucurbitifolia</i>   | JN044028 |
| Eudicotyledons | Begoniaceae     | <i>Begonia</i>      | <i>Begonia cucurbitifolia</i>   | JN044029 |
| Eudicotyledons | Begoniaceae     | <i>Begonia</i>      | <i>Begonia cylindrica</i>       | JN044030 |
| Eudicotyledons | Begoniaceae     | <i>Begonia</i>      | <i>Begonia cylindrica</i>       | JN044031 |
| Eudicotyledons | Begoniaceae     | <i>Begonia</i>      | <i>Begonia cylindrica</i>       | JN044032 |
| Eudicotyledons | Begoniaceae     | <i>Begonia</i>      | <i>Begonia daweishanensis</i>   | JN044033 |
| Eudicotyledons | Begoniaceae     | <i>Begonia</i>      | <i>Begonia daweishanensis</i>   | JN044034 |
| Eudicotyledons | Begoniaceae     | <i>Begonia</i>      | <i>Begonia daweishanensis</i>   | JN044035 |





|                |             |                    |                                 |          |
|----------------|-------------|--------------------|---------------------------------|----------|
| Eudicotyledons | Begoniaceae | <i>Begonia</i>     | <i>Begonia megalophyllaria</i>  | JN044102 |
| Eudicotyledons | Begoniaceae | <i>Begonia</i>     | <i>Begonia megalophyllaria</i>  | JN044103 |
| Eudicotyledons | Begoniaceae | <i>Begonia</i>     | <i>Begonia megalophyllaria</i>  | JN044104 |
| Eudicotyledons | Begoniaceae | <i>Begonia</i>     | <i>Begonia mengtzeana</i>       | JN044105 |
| Eudicotyledons | Begoniaceae | <i>Begonia</i>     | <i>Begonia mengtzeana</i>       | JN044106 |
| Eudicotyledons | Begoniaceae | <i>Begonia</i>     | <i>Begonia mengtzeana</i>       | JN044107 |
| Eudicotyledons | Begoniaceae | <i>Begonia</i>     | <i>Begonia mengtzeana</i>       | JN044108 |
| Eudicotyledons | Begoniaceae | <i>Begonia</i>     | <i>Begonia mengtzeana</i>       | JN044109 |
| Eudicotyledons | Begoniaceae | <i>Begonia</i>     | <i>Begonia ornithophylla</i>    | JN044113 |
| Eudicotyledons | Begoniaceae | <i>Begonia</i>     | <i>Begonia ornithophylla</i>    | JN044114 |
| Eudicotyledons | Begoniaceae | <i>Begonia</i>     | <i>Begonia platycarpa</i>       | JN044115 |
| Eudicotyledons | Begoniaceae | <i>Begonia</i>     | <i>Begonia platycarpa</i>       | JN044116 |
| Eudicotyledons | Begoniaceae | <i>Begonia</i>     | <i>Begonia platycarpa</i>       | JN044117 |
| Eudicotyledons | Begoniaceae | <i>Begonia</i>     | <i>Begonia platycarpa</i>       | JN044118 |
| Eudicotyledons | Begoniaceae | <i>Begonia</i>     | <i>Begonia platycarpa</i>       | JN044119 |
| Eudicotyledons | Begoniaceae | <i>Begonia</i>     | <i>Begonia purpureofolia</i>    | JN044120 |
| Eudicotyledons | Begoniaceae | <i>Begonia</i>     | <i>Begonia purpureofolia</i>    | JN044121 |
| Eudicotyledons | Begoniaceae | <i>Begonia</i>     | <i>Begonia purpureofolia</i>    | JN044122 |
| Eudicotyledons | Begoniaceae | <i>Begonia</i>     | <i>Begonia purpureofolia</i>    | JN044123 |
| Eudicotyledons | Begoniaceae | <i>Begonia</i>     | <i>Begonia purpureofolia</i>    | JN044124 |
| Eudicotyledons | Begoniaceae | <i>Begonia</i>     | <i>Begonia purpureofolia</i>    | JN044125 |
| Eudicotyledons | Begoniaceae | <i>Begonia</i>     | <i>Begonia umbraculifolia</i>   | JN044132 |
| Eudicotyledons | Begoniaceae | <i>Begonia</i>     | <i>Begonia umbraculifolia</i>   | JN044133 |
| Eudicotyledons | Begoniaceae | <i>Begonia</i>     | <i>Begonia umbraculifolia</i>   | JN044134 |
| Eudicotyledons | Begoniaceae | <i>Begonia</i>     | <i>Begonia umbraculifolia</i>   | JN044135 |
| Eudicotyledons | Begoniaceae | <i>Begonia</i>     | <i>Begonia villifolia</i>       | JN044139 |
| Eudicotyledons | Begoniaceae | <i>Begonia</i>     | <i>Begonia villifolia</i>       | JN044140 |
| Eudicotyledons | Begoniaceae | <i>Begonia</i>     | <i>Begonia villifolia</i>       | JN044141 |
| Eudicotyledons | Begoniaceae | <i>Begonia</i>     | <i>Begonia villifolia</i>       | JN044142 |
| Eudicotyledons | Begoniaceae | <i>Begonia</i>     | <i>Begonia villifolia</i>       | JN044143 |
| Eudicotyledons | Begoniaceae | <i>Begonia</i>     | <i>Begonia villifolia</i>       | JN044144 |
| Eudicotyledons | Begoniaceae | <i>Begonia</i>     | <i>Begonia wangii</i>           | JN044145 |
| Eudicotyledons | Begoniaceae | <i>Begonia</i>     | <i>Begonia wangii</i>           | JN044146 |
| Eudicotyledons | Begoniaceae | <i>Begonia</i>     | <i>Begonia wangii</i>           | JN044147 |
| Eudicotyledons | Begoniaceae | <i>Begonia</i>     | <i>Begonia wangii</i>           | JN044148 |
| Eudicotyledons | Begoniaceae | <i>Begonia</i>     | <i>Begonia wangii</i>           | JN044149 |
| Eudicotyledons | Begoniaceae | <i>Begonia</i>     | <i>Begonia wangii</i>           | JN044150 |
| Eudicotyledons | Meliaceae   | <i>Cipadessa</i>   | <i>Cipadessa cinerascens</i>    | JN044304 |
| Eudicotyledons | Meliaceae   | <i>Cipadessa</i>   | <i>Cipadessa cinerascens</i>    | JN044305 |
| Eudicotyledons | Rubiaceae   | <i>Oldenlandia</i> | <i>Oldenlandia bodinieri</i>    | JF699770 |
| Eudicotyledons | Rubiaceae   | <i>Oldenlandia</i> | <i>Oldenlandia bodinieri</i>    | JF699771 |
| Eudicotyledons | Rubiaceae   | <i>Oldenlandia</i> | <i>Oldenlandia bodinieri</i>    | JF699772 |
| Eudicotyledons | Rubiaceae   | <i>Oldenlandia</i> | <i>Oldenlandia bodinieri</i>    | JN044760 |
| Eudicotyledons | Rubiaceae   | <i>Oldenlandia</i> | <i>Oldenlandia bodinieri</i>    | JN044761 |
| Eudicotyledons | Rubiaceae   | <i>Oldenlandia</i> | <i>Oldenlandia bodinieri</i>    | JN044762 |
| Eudicotyledons | Rubiaceae   | <i>Oldenlandia</i> | <i>Oldenlandia chrysotricha</i> | JF699778 |
| Eudicotyledons | Rubiaceae   | <i>Oldenlandia</i> | <i>Oldenlandia chrysotricha</i> | JF699779 |
| Eudicotyledons | Rubiaceae   | <i>Oldenlandia</i> | <i>Oldenlandia chrysotricha</i> | JF699780 |
| Eudicotyledons | Rubiaceae   | <i>Oldenlandia</i> | <i>Oldenlandia chrysotricha</i> | JF699781 |
| Eudicotyledons | Rubiaceae   | <i>Oldenlandia</i> | <i>Oldenlandia chrysotricha</i> | JN044767 |
| Eudicotyledons | Rubiaceae   | <i>Oldenlandia</i> | <i>Oldenlandia chrysotricha</i> | JN044768 |
| Eudicotyledons | Rubiaceae   | <i>Oldenlandia</i> | <i>Oldenlandia ovatifolia</i>   | JF699793 |
| Eudicotyledons | Rubiaceae   | <i>Oldenlandia</i> | <i>Oldenlandia ovatifolia</i>   | JF699794 |

|                |               |                      |                                   |          |
|----------------|---------------|----------------------|-----------------------------------|----------|
| Eudicotyledons | Rubiaceae     | <i>Oldenlandia</i>   | <i>Oldenlandia ovatifolia</i>     | JF699795 |
| Eudicotyledons | Rubiaceae     | <i>Oldenlandia</i>   | <i>Oldenlandia ovatifolia</i>     | JF699796 |
| Eudicotyledons | Rubiaceae     | <i>Oldenlandia</i>   | <i>Oldenlandia ovatifolia</i>     | JN044777 |
| Eudicotyledons | Rubiaceae     | <i>Oldenlandia</i>   | <i>Oldenlandia ovatifolia</i>     | JN044778 |
| Eudicotyledons | Rubiaceae     | <i>Oldenlandia</i>   | <i>Oldenlandia tenuipes</i>       | JF699812 |
| Eudicotyledons | Rubiaceae     | <i>Oldenlandia</i>   | <i>Oldenlandia tenuipes</i>       | JF699813 |
| Eudicotyledons | Rubiaceae     | <i>Oldenlandia</i>   | <i>Oldenlandia tenuipes</i>       | JN044787 |
| Eudicotyledons | Rubiaceae     | <i>Oldenlandia</i>   | <i>Oldenlandia tenuipes</i>       | JN044788 |
| Eudicotyledons | Geraniaceae   | <i>Geranium</i>      | <i>Geranium melanandrum</i>       | JN044737 |
| Eudicotyledons | Geraniaceae   | <i>Geranium</i>      | <i>Geranium melanandrum</i>       | JN044738 |
| Eudicotyledons | Rubiaceae     | <i>Oldenlandia</i>   | <i>Oldenlandia assimilis</i>      | JF699761 |
| Eudicotyledons | Rubiaceae     | <i>Oldenlandia</i>   | <i>Oldenlandia assimilis</i>      | JF699762 |
| Eudicotyledons | Rubiaceae     | <i>Oldenlandia</i>   | <i>Oldenlandia assimilis</i>      | JF699763 |
| Eudicotyledons | Rubiaceae     | <i>Oldenlandia</i>   | <i>Oldenlandia assimilis</i>      | JF699764 |
| Eudicotyledons | Vitaceae      | <i>Vitis</i>         | <i>Vitis biformis</i>             | HQ656418 |
| Eudicotyledons | Vitaceae      | <i>Vitis</i>         | <i>Vitis biformis</i>             | HQ656419 |
| Eudicotyledons | Vitaceae      | <i>Vitis</i>         | <i>Vitis chunganensis</i>         | HQ656431 |
| Eudicotyledons | Vitaceae      | <i>Vitis</i>         | <i>Vitis chunganensis</i>         | JF437159 |
| Eudicotyledons | Vitaceae      | <i>Vitis</i>         | <i>Vitis rotundifolia</i>         | HQ656428 |
| Eudicotyledons | Vitaceae      | <i>Vitis</i>         | <i>Vitis rotundifolia</i>         | HQ656435 |
| Eudicotyledons | Fabaceae      | <i>Canavalia</i>     | <i>Canavalia hawaiiensis</i>      | HQ707433 |
| Eudicotyledons | Fabaceae      | <i>Canavalia</i>     | <i>Canavalia hawaiiensis</i>      | HQ707440 |
| Eudicotyledons | Fabaceae      | <i>Canavalia</i>     | <i>Canavalia galeata</i>          | HQ707436 |
| Eudicotyledons | Fabaceae      | <i>Canavalia</i>     | <i>Canavalia galeata</i>          | HQ707439 |
| Eudicotyledons | Vitaceae      | <i>Vitis</i>         | <i>Vitis lanata</i>               | JF437162 |
| Eudicotyledons | Vitaceae      | <i>Vitis</i>         | <i>Vitis lanata</i>               | JF437163 |
| Eudicotyledons | Begoniaceae   | <i>Begonia</i>       | <i>Begonia liuyanii</i>           | JN044054 |
| Eudicotyledons | Begoniaceae   | <i>Begonia</i>       | <i>Begonia liuyanii</i>           | JN044055 |
| Eudicotyledons | Begoniaceae   | <i>Begonia</i>       | <i>Begonia liuyanii</i>           | JN044056 |
| Eudicotyledons | Begoniaceae   | <i>Begonia</i>       | <i>Begonia liuyanii</i>           | JN044057 |
| Eudicotyledons | Begoniaceae   | <i>Begonia</i>       | <i>Begonia liuyanii</i>           | JN044058 |
| Eudicotyledons | Begoniaceae   | <i>Begonia</i>       | <i>Begonia zhengyiana</i>         | JN044151 |
| Eudicotyledons | Begoniaceae   | <i>Begonia</i>       | <i>Begonia zhengyiana</i>         | JN044152 |
| Eudicotyledons | Celastraceae  | <i>Parnassia</i>     | <i>Parnassia bifolia</i>          | JN045784 |
| Eudicotyledons | Celastraceae  | <i>Parnassia</i>     | <i>Parnassia bifolia</i>          | JN045785 |
| Eudicotyledons | Rosaceae      | <i>Prunus</i>        | <i>Armeniaca zhengheensis</i>     | JN046668 |
| Eudicotyledons | Rosaceae      | <i>Prunus</i>        | <i>Armeniaca zhengheensis</i>     | JN046669 |
| Eudicotyledons | Lamiaceae     | <i>Scutellaria</i>   | <i>Scutellaria amoena</i>         | HQ680370 |
| Eudicotyledons | Lamiaceae     | <i>Scutellaria</i>   | <i>Scutellaria amoena</i>         | HQ680371 |
| Eudicotyledons | Cucurbitaceae | <i>Trichosanthes</i> | <i>Trichosanthes baviensis</i>    | HQ829543 |
| Eudicotyledons | Cucurbitaceae | <i>Trichosanthes</i> | <i>Trichosanthes baviensis</i>    | HQ829544 |
| Eudicotyledons | Cucurbitaceae | <i>Trichosanthes</i> | <i>Trichosanthes baviensis</i>    | HQ829545 |
| Eudicotyledons | Cucurbitaceae | <i>Trichosanthes</i> | <i>Trichosanthes baviensis</i>    | HQ829546 |
| Eudicotyledons | Cucurbitaceae | <i>Trichosanthes</i> | <i>Trichosanthes baviensis</i>    | HQ829547 |
| Eudicotyledons | Cucurbitaceae | <i>Trichosanthes</i> | <i>Trichosanthes baviensis</i>    | HQ829548 |
| Eudicotyledons | Cucurbitaceae | <i>Trichosanthes</i> | <i>Trichosanthes baviensis</i>    | HQ829549 |
| Eudicotyledons | Cucurbitaceae | <i>Trichosanthes</i> | <i>Trichosanthes dunniana</i>     | HQ829553 |
| Eudicotyledons | Cucurbitaceae | <i>Trichosanthes</i> | <i>Trichosanthes dunniana</i>     | HQ829554 |
| Eudicotyledons | Myrtaceae     | <i>Eucalyptus</i>    | <i>Eucalyptus loxophleba</i>      | HQ170467 |
| Eudicotyledons | Myrtaceae     | <i>Eucalyptus</i>    | <i>Eucalyptus loxophleba</i>      | HQ170468 |
| Eudicotyledons | Ericaceae     | <i>Rhododendron</i>  | <i>Rhododendron glanduliferum</i> | HQ706975 |
| Eudicotyledons | Ericaceae     | <i>Rhododendron</i>  | <i>Rhododendron glanduliferum</i> | HQ706976 |
| Eudicotyledons | Ericaceae     | <i>Rhododendron</i>  | <i>Rhododendron hunanense</i>     | HQ706978 |

|                |               |                     |                                     |          |
|----------------|---------------|---------------------|-------------------------------------|----------|
| Eudicotyledons | Ericaceae     | <i>Rhododendron</i> | <i>Rhododendron hunanense</i>       | HQ706979 |
| Eudicotyledons | Ericaceae     | <i>Rhododendron</i> | <i>Rhododendron hypoblematosum</i>  | HQ706980 |
| Eudicotyledons | Ericaceae     | <i>Rhododendron</i> | <i>Rhododendron hypoblematosum</i>  | HQ706981 |
| Eudicotyledons | Ericaceae     | <i>Rhododendron</i> | <i>Rhododendron rhuyuenense</i>     | HQ707014 |
| Eudicotyledons | Ericaceae     | <i>Rhododendron</i> | <i>Rhododendron rhuyuenense</i>     | HQ707015 |
| Eudicotyledons | Ericaceae     | <i>Rhododendron</i> | <i>Rhododendron simiarum</i>        | HQ707020 |
| Eudicotyledons | Ericaceae     | <i>Rhododendron</i> | <i>Rhododendron simiarum</i>        | HQ707021 |
| Eudicotyledons | Ericaceae     | <i>Rhododendron</i> | <i>Rhododendron spanotrichum</i>    | HQ707023 |
| Eudicotyledons | Ericaceae     | <i>Rhododendron</i> | <i>Rhododendron spanotrichum</i>    | HQ707024 |
| Eudicotyledons | Ericaceae     | <i>Rhododendron</i> | <i>Rhododendron zhangjiajieense</i> | HQ707040 |
| Eudicotyledons | Ericaceae     | <i>Rhododendron</i> | <i>Rhododendron zhangjiajieense</i> | HQ707041 |
| Eudicotyledons | Ericaceae     | <i>Rhododendron</i> | <i>Rhododendron x fragrans</i>      | HQ706973 |
| Eudicotyledons | Ericaceae     | <i>Rhododendron</i> | <i>Rhododendron x fragrans</i>      | HQ706974 |
| Eudicotyledons | Solanaceae    | <i>Solanum</i>      | <i>Solanum limoncochaense</i>       | HQ856102 |
| Eudicotyledons | Solanaceae    | <i>Solanum</i>      | <i>Solanum limoncochaense</i>       | HQ856103 |
| Eudicotyledons | Solanaceae    | <i>Solanum</i>      | <i>Solanum loxophyllum</i>          | HQ856099 |
| Eudicotyledons | Solanaceae    | <i>Solanum</i>      | <i>Solanum loxophyllum</i>          | HQ856100 |
| Eudicotyledons | Lamiaceae     | <i>Ajuga</i>        | <i>Ajuga orientalis</i>             | HQ902817 |
| Eudicotyledons | Lamiaceae     | <i>Ajuga</i>        | <i>Ajuga orientalis</i>             | HQ902870 |
| Eudicotyledons | Myrtaceae     | <i>Myrcia</i>       | <i>Myrcia amazonica</i>             | JN091403 |
| Eudicotyledons | Myrtaceae     | <i>Myrcia</i>       | <i>Myrcia amazonica</i>             | JN091404 |
| Eudicotyledons | Myrtaceae     | <i>Myrcia</i>       | <i>Myrcia amazonica</i>             | JN091405 |
| Eudicotyledons | Myrtaceae     | <i>Myrcia</i>       | <i>Myrcia amazonica</i>             | JN091406 |
| Eudicotyledons | Myrtaceae     | <i>Myrcia</i>       | <i>Myrcia guianensis</i>            | JN091415 |
| Eudicotyledons | Myrtaceae     | <i>Myrcia</i>       | <i>Myrcia guianensis</i>            | JN091416 |
| Eudicotyledons | Asteraceae    | <i>Santolina</i>    | <i>Santolina benthamiana</i>        | JF345734 |
| Eudicotyledons | Asteraceae    | <i>Santolina</i>    | <i>Santolina benthamiana</i>        | JF345735 |
| Eudicotyledons | Asteraceae    | <i>Santolina</i>    | <i>Santolina corsica</i>            | JF345747 |
| Eudicotyledons | Asteraceae    | <i>Santolina</i>    | <i>Santolina corsica</i>            | JF345748 |
| Eudicotyledons | Asteraceae    | <i>Santolina</i>    | <i>Santolina pectinata</i>          | JF345754 |
| Eudicotyledons | Asteraceae    | <i>Santolina</i>    | <i>Santolina pectinata</i>          | JF345755 |
| Eudicotyledons | Asteraceae    | <i>Santolina</i>    | <i>Santolina pectinata</i>          | JF345756 |
| Eudicotyledons | Asteraceae    | <i>Santolina</i>    | <i>Santolina pectinata</i>          | JF345761 |
| Eudicotyledons | Asteraceae    | <i>Santolina</i>    | <i>Santolina pectinata</i>          | JF345774 |
| Eudicotyledons | Asteraceae    | <i>Santolina</i>    | <i>Santolina semidentata</i>        | JF345738 |
| Eudicotyledons | Asteraceae    | <i>Santolina</i>    | <i>Santolina semidentata</i>        | JF345766 |
| Eudicotyledons | Asteraceae    | <i>Santolina</i>    | <i>Santolina semidentata</i>        | JF345772 |
| Eudicotyledons | Asteraceae    | <i>Santolina</i>    | <i>Santolina semidentata</i>        | JF345773 |
| Eudicotyledons | Asteraceae    | <i>Santolina</i>    | <i>Santolina villosa</i>            | JF345727 |
| Eudicotyledons | Asteraceae    | <i>Santolina</i>    | <i>Santolina villosa</i>            | JF345728 |
| Eudicotyledons | Asteraceae    | <i>Santolina</i>    | <i>Santolina villosa</i>            | JF345729 |
| Eudicotyledons | Asteraceae    | <i>Santolina</i>    | <i>Santolina villosa</i>            | JF345730 |
| Eudicotyledons | Asteraceae    | <i>Santolina</i>    | <i>Santolina villosa</i>            | JF345731 |
| Eudicotyledons | Asteraceae    | <i>Santolina</i>    | <i>Santolina villosa</i>            | JF345732 |
| Eudicotyledons | Asteraceae    | <i>Santolina</i>    | <i>Santolina virens</i>             | JF345764 |
| Eudicotyledons | Asteraceae    | <i>Santolina</i>    | <i>Santolina virens</i>             | JF345765 |
| Eudicotyledons | Ranunculaceae | <i>Eranthis</i>     | <i>Eranthis pungdoensis</i>         | JF505835 |
| Eudicotyledons | Ranunculaceae | <i>Eranthis</i>     | <i>Eranthis pungdoensis</i>         | JF505836 |
| Eudicotyledons | Ranunculaceae | <i>Eranthis</i>     | <i>Eranthis pungdoensis</i>         | JF505837 |
| Eudicotyledons | Ranunculaceae | <i>Eranthis</i>     | <i>Eranthis pungdoensis</i>         | JF505838 |
| Eudicotyledons | Ranunculaceae | <i>Eranthis</i>     | <i>Eranthis pungdoensis</i>         | JF505839 |
| Eudicotyledons | Ranunculaceae | <i>Eranthis</i>     | <i>Eranthis pungdoensis</i>         | JF505840 |
| Eudicotyledons | Ranunculaceae | <i>Eranthis</i>     | <i>Eranthis pungdoensis</i>         | JF505841 |

|                |               |                     |                              |          |
|----------------|---------------|---------------------|------------------------------|----------|
| Eudicotyledons | Ranunculaceae | <i>Eranthis</i>     | <i>Eranthis pungdoensis</i>  | JF505842 |
| Eudicotyledons | Orobanchaceae | <i>Agalinis</i>     | <i>Agalinis auriculata</i>   | EU827893 |
| Eudicotyledons | Orobanchaceae | <i>Agalinis</i>     | <i>Agalinis auriculata</i>   | EU827894 |
| Eudicotyledons | Rosaceae      | <i>Dasiphora</i>    | <i>Dasiphora fruticosa</i>   | JN044373 |
| Eudicotyledons | Rosaceae      | <i>Dasiphora</i>    | <i>Dasiphora fruticosa</i>   | JN044374 |
| Eudicotyledons | Rosaceae      | <i>Dasiphora</i>    | <i>Dasiphora fruticosa</i>   | JN044375 |
| Eudicotyledons | Rosaceae      | <i>Dasiphora</i>    | <i>Dasiphora fruticosa</i>   | JN044376 |
| Eudicotyledons | Rosaceae      | <i>Dasiphora</i>    | <i>Dasiphora fruticosa</i>   | JN044377 |
| Eudicotyledons | Rosaceae      | <i>Dasiphora</i>    | <i>Dasiphora fruticosa</i>   | JN044378 |
| Eudicotyledons | Rosaceae      | <i>Dasiphora</i>    | <i>Dasiphora fruticosa</i>   | JN044379 |
| Eudicotyledons | Araliaceae    | <i>Dendropanax</i>  | <i>Dendropanax arboreus</i>  | GQ982206 |
| Eudicotyledons | Araliaceae    | <i>Dendropanax</i>  | <i>Dendropanax arboreus</i>  | GU054860 |
| Eudicotyledons | Araliaceae    | <i>Dendropanax</i>  | <i>Dendropanax arboreus</i>  | GU054874 |
| Eudicotyledons | Araliaceae    | <i>Dendropanax</i>  | <i>Dendropanax arboreus</i>  | GU054882 |
| Eudicotyledons | Araliaceae    | <i>Dendropanax</i>  | <i>Dendropanax arboreus</i>  | HM446923 |
| Eudicotyledons | Araliaceae    | <i>Schefflera</i>   | <i>Schefflera arboricola</i> | GU054816 |
| Eudicotyledons | Araliaceae    | <i>Schefflera</i>   | <i>Schefflera arboricola</i> | FN675800 |
| Eudicotyledons | Fabaceae      | <i>Schizolobium</i> | <i>Schizolobium parahyba</i> | GQ167769 |
| Eudicotyledons | Fabaceae      | <i>Schizolobium</i> | <i>Schizolobium parahyba</i> | AF524985 |
| Eudicotyledons | Fabaceae      | <i>Schizolobium</i> | <i>Schizolobium parahyba</i> | FJ668606 |
| Eudicotyledons | Fabaceae      | <i>Schizolobium</i> | <i>Schizolobium parahyba</i> | FJ668607 |
| Eudicotyledons | Fabaceae      | <i>Schizolobium</i> | <i>Schizolobium parahyba</i> | FJ668610 |
| Eudicotyledons | Fabaceae      | <i>Schizolobium</i> | <i>Schizolobium parahyba</i> | FJ668611 |
| Eudicotyledons | Fabaceae      | <i>Schizolobium</i> | <i>Schizolobium parahyba</i> | FJ668612 |
| Eudicotyledons | Fabaceae      | <i>Schizolobium</i> | <i>Schizolobium parahyba</i> | FJ668613 |
| Eudicotyledons | Fabaceae      | <i>Schizolobium</i> | <i>Schizolobium parahyba</i> | GQ982357 |
| Eudicotyledons | Polygonaceae  | <i>Persicaria</i>   | <i>Persicaria hydropiper</i> | HQ596796 |
| Eudicotyledons | Polygonaceae  | <i>Persicaria</i>   | <i>Persicaria hydropiper</i> | EF653753 |
| Eudicotyledons | Polygonaceae  | <i>Persicaria</i>   | <i>Persicaria hydropiper</i> | EF653754 |
| Eudicotyledons | Polygonaceae  | <i>Persicaria</i>   | <i>Persicaria hydropiper</i> | EU750490 |
| Eudicotyledons | Polygonaceae  | <i>Persicaria</i>   | <i>Persicaria hydropiper</i> | EU750491 |
| Eudicotyledons | Polygonaceae  | <i>Persicaria</i>   | <i>Persicaria hydropiper</i> | JN046425 |
| Eudicotyledons | Polygonaceae  | <i>Persicaria</i>   | <i>Persicaria hydropiper</i> | JN046426 |
| Eudicotyledons | Elaeagnaceae  | <i>Hippophae</i>    | <i>Hippophae salicifolia</i> | JN044909 |
| Eudicotyledons | Elaeagnaceae  | <i>Hippophae</i>    | <i>Hippophae salicifolia</i> | JN044910 |
| Eudicotyledons | Elaeagnaceae  | <i>Hippophae</i>    | <i>Hippophae salicifolia</i> | JN044911 |
| Eudicotyledons | Elaeagnaceae  | <i>Hippophae</i>    | <i>Hippophae salicifolia</i> | JN044912 |
| Eudicotyledons | Elaeagnaceae  | <i>Hippophae</i>    | <i>Hippophae salicifolia</i> | JN044913 |
| Eudicotyledons | Orobanchaceae | <i>Castilleja</i>   | <i>Castilleja miniata</i>    | FJ765679 |
| Eudicotyledons | Orobanchaceae | <i>Castilleja</i>   | <i>Castilleja miniata</i>    | FJ765680 |
| Eudicotyledons | Orobanchaceae | <i>Castilleja</i>   | <i>Castilleja miniata</i>    | FJ765681 |
| Eudicotyledons | Orobanchaceae | <i>Castilleja</i>   | <i>Castilleja miniata</i>    | FJ765682 |
| Eudicotyledons | Orobanchaceae | <i>Castilleja</i>   | <i>Castilleja miniata</i>    | FJ765683 |
| Eudicotyledons | Orobanchaceae | <i>Castilleja</i>   | <i>Castilleja miniata</i>    | FJ765684 |
| Eudicotyledons | Orobanchaceae | <i>Castilleja</i>   | <i>Castilleja miniata</i>    | FJ765685 |
| Eudicotyledons | Orobanchaceae | <i>Castilleja</i>   | <i>Castilleja miniata</i>    | FJ765686 |
| Eudicotyledons | Orobanchaceae | <i>Castilleja</i>   | <i>Castilleja miniata</i>    | FJ765687 |
| Eudicotyledons | Orobanchaceae | <i>Castilleja</i>   | <i>Castilleja miniata</i>    | FJ765688 |
| Eudicotyledons | Orobanchaceae | <i>Castilleja</i>   | <i>Castilleja miniata</i>    | FJ765689 |
| Eudicotyledons | Orobanchaceae | <i>Castilleja</i>   | <i>Castilleja miniata</i>    | FJ765690 |
| Eudicotyledons | Orobanchaceae | <i>Castilleja</i>   | <i>Castilleja miniata</i>    | FJ765691 |
| Eudicotyledons | Orobanchaceae | <i>Castilleja</i>   | <i>Castilleja miniata</i>    | FJ765692 |
| Eudicotyledons | Orobanchaceae | <i>Castilleja</i>   | <i>Castilleja miniata</i>    | FJ765693 |

|                |                |                    |                              |          |
|----------------|----------------|--------------------|------------------------------|----------|
| Eudicotyledons | Orobanchaceae  | <i>Castilleja</i>  | <i>Castilleja miniata</i>    | FJ765694 |
| Eudicotyledons | Gesneriaceae   | <i>Cyrtandra</i>   | <i>Cyrtandra hawaiiensis</i> | GQ475133 |
| Eudicotyledons | Gesneriaceae   | <i>Cyrtandra</i>   | <i>Cyrtandra hawaiiensis</i> | GQ475158 |
| Eudicotyledons | Gesneriaceae   | <i>Cyrtandra</i>   | <i>Cyrtandra hawaiiensis</i> | GQ475159 |
| Eudicotyledons | Gesneriaceae   | <i>Cyrtandra</i>   | <i>Cyrtandra hawaiiensis</i> | EU920008 |
| Eudicotyledons | Ericaceae      | <i>Pieris</i>      | <i>Pieris floribunda</i>     | EU547720 |
| Eudicotyledons | Ericaceae      | <i>Pieris</i>      | <i>Pieris floribunda</i>     | AB206629 |
| Eudicotyledons | Ericaceae      | <i>Pieris</i>      | <i>Pieris formosa</i>        | HQ426993 |
| Eudicotyledons | Ericaceae      | <i>Pieris</i>      | <i>Pieris formosa</i>        | EU547718 |
| Eudicotyledons | Ericaceae      | <i>Pieris</i>      | <i>Pieris formosa</i>        | AB206627 |
| Eudicotyledons | Ericaceae      | <i>Pieris</i>      | <i>Pieris nana</i>           | EU547716 |
| Eudicotyledons | Ericaceae      | <i>Pieris</i>      | <i>Pieris nana</i>           | AB206630 |
| Eudicotyledons | Ericaceae      | <i>Pieris</i>      | <i>Pieris nana</i>           | AB259356 |
| Eudicotyledons | Ericaceae      | <i>Pieris</i>      | <i>Pieris phillyreifolia</i> | EU547721 |
| Eudicotyledons | Ericaceae      | <i>Pieris</i>      | <i>Pieris phillyreifolia</i> | AB206628 |
| Eudicotyledons | Apiaceae       | <i>Osmorhiza</i>   | <i>Osmorhiza aristata</i>    | JN045638 |
| Eudicotyledons | Apiaceae       | <i>Osmorhiza</i>   | <i>Osmorhiza aristata</i>    | JN045639 |
| Eudicotyledons | Apiaceae       | <i>Osmorhiza</i>   | <i>Osmorhiza aristata</i>    | JN045640 |
| Eudicotyledons | Apiaceae       | <i>Peucedanum</i>  | <i>Peucedanum japonicum</i>  | JN046219 |
| Eudicotyledons | Apiaceae       | <i>Peucedanum</i>  | <i>Peucedanum japonicum</i>  | JN046220 |
| Eudicotyledons | Apiaceae       | <i>Peucedanum</i>  | <i>Peucedanum japonicum</i>  | JN046221 |
| Eudicotyledons | Fabaceae       | <i>Glycyrrhiza</i> | <i>Glycyrrhiza glabra</i>    | HE659562 |
| Eudicotyledons | Fabaceae       | <i>Glycyrrhiza</i> | <i>Glycyrrhiza glabra</i>    | GU396809 |
| Eudicotyledons | Fabaceae       | <i>Glycyrrhiza</i> | <i>Glycyrrhiza glabra</i>    | GU396810 |
| Eudicotyledons | Lamiaceae      | <i>Thymus</i>      | <i>Thymus vulgaris</i>       | FR726148 |
| Eudicotyledons | Lamiaceae      | <i>Thymus</i>      | <i>Thymus vulgaris</i>       | FR726149 |
| Eudicotyledons | Lamiaceae      | <i>Thymus</i>      | <i>Thymus vulgaris</i>       | FR726150 |
| Eudicotyledons | Lamiaceae      | <i>Thymus</i>      | <i>Thymus vulgaris</i>       | AY679164 |
| Eudicotyledons | Asteraceae     | <i>Sonchus</i>     | <i>Sonchus asper</i>         | FJ395510 |
| Eudicotyledons | Asteraceae     | <i>Sonchus</i>     | <i>Sonchus asper</i>         | EU750573 |
| Eudicotyledons | Asteraceae     | <i>Sonchus</i>     | <i>Sonchus asper</i>         | EU750574 |
| Eudicotyledons | Asteraceae     | <i>Sonchus</i>     | <i>Sonchus asper</i>         | EU750575 |
| Eudicotyledons | Asteraceae     | <i>Sonchus</i>     | <i>Sonchus asper</i>         | AY457989 |
| Eudicotyledons | Asteraceae     | <i>Sonchus</i>     | <i>Sonchus oleraceus</i>     | HQ596853 |
| Eudicotyledons | Asteraceae     | <i>Sonchus</i>     | <i>Sonchus oleraceus</i>     | EU750576 |
| Eudicotyledons | Asteraceae     | <i>Sonchus</i>     | <i>Sonchus oleraceus</i>     | EU750577 |
| Eudicotyledons | Asteraceae     | <i>Sonchus</i>     | <i>Sonchus oleraceus</i>     | AY457987 |
| Eudicotyledons | Asteraceae     | <i>Sonchus</i>     | <i>Sonchus oleraceus</i>     | AY457988 |
| Eudicotyledons | Asteraceae     | <i>Taraxacum</i>   | <i>Taraxacum officinale</i>  | FJ395471 |
| Eudicotyledons | Asteraceae     | <i>Taraxacum</i>   | <i>Taraxacum officinale</i>  | HQ162035 |
| Eudicotyledons | Ranunculaceae  | <i>Aconitum</i>    | <i>Aconitum nagarum</i>      | GQ337841 |
| Eudicotyledons | Ranunculaceae  | <i>Aconitum</i>    | <i>Aconitum nagarum</i>      | GQ337842 |
| Eudicotyledons | Ranunculaceae  | <i>Aconitum</i>    | <i>Aconitum nagarum</i>      | FJ821186 |
| Eudicotyledons | Hamamelidaceae | <i>Corylopsis</i>  | <i>Corylopsis pauciflora</i> | AB237062 |
| Eudicotyledons | Hamamelidaceae | <i>Corylopsis</i>  | <i>Corylopsis pauciflora</i> | AB237065 |
| Eudicotyledons | Hamamelidaceae | <i>Corylopsis</i>  | <i>Corylopsis pauciflora</i> | AB237066 |
| Eudicotyledons | Hamamelidaceae | <i>Corylopsis</i>  | <i>Corylopsis pauciflora</i> | AB237077 |
| Eudicotyledons | Hamamelidaceae | <i>Corylopsis</i>  | <i>Corylopsis spicata</i>    | AB237063 |
| Eudicotyledons | Hamamelidaceae | <i>Corylopsis</i>  | <i>Corylopsis spicata</i>    | AB237075 |
| Eudicotyledons | Apocynaceae    | <i>Alstonia</i>    | <i>Alstonia scholaris</i>    | GQ435037 |
| Eudicotyledons | Apocynaceae    | <i>Alstonia</i>    | <i>Alstonia scholaris</i>    | GQ435038 |
| Eudicotyledons | Apocynaceae    | <i>Alstonia</i>    | <i>Alstonia scholaris</i>    | JN245985 |
| Eudicotyledons | Lamiaceae      | <i>Lamium</i>      | <i>Lamium amplexicaule</i>   | AY281318 |

|                |              |                     |                                 |          |
|----------------|--------------|---------------------|---------------------------------|----------|
| Eudicotyledons | Lamiaceae    | <i>Lamium</i>       | <i>Lamium amplexicaule</i>      | HQ902820 |
| Eudicotyledons | Lamiaceae    | <i>Lamium</i>       | <i>Lamium amplexicaule</i>      | HQ902852 |
| Eudicotyledons | Lamiaceae    | <i>Lamium</i>       | <i>Lamium maculatum</i>         | JF780167 |
| Eudicotyledons | Lamiaceae    | <i>Lamium</i>       | <i>Lamium maculatum</i>         | JF780168 |
| Eudicotyledons | Lamiaceae    | <i>Lamium</i>       | <i>Lamium purpureum</i>         | JF780180 |
| Eudicotyledons | Lamiaceae    | <i>Lamium</i>       | <i>Lamium purpureum</i>         | JF780181 |
| Eudicotyledons | Lamiaceae    | <i>Lamium</i>       | <i>Lamium purpureum</i>         | JF780182 |
| Eudicotyledons | Lamiaceae    | <i>Lamium</i>       | <i>Lamium purpureum</i>         | JF780183 |
| Eudicotyledons | Fabaceae     | <i>Andira</i>       | <i>Andira inermis</i>           | GQ429134 |
| Eudicotyledons | Fabaceae     | <i>Andira</i>       | <i>Andira inermis</i>           | GQ982145 |
| Eudicotyledons | Fabaceae     | <i>Andira</i>       | <i>Andira inermis</i>           | HM446886 |
| Eudicotyledons | Fabaceae     | <i>Chamaecrista</i> | <i>Chamaecrista fasciculata</i> | GQ248261 |
| Eudicotyledons | Fabaceae     | <i>Chamaecrista</i> | <i>Chamaecrista fasciculata</i> | EF590677 |
| Eudicotyledons | Fabaceae     | <i>Dalbergia</i>    | <i>Dalbergia hupeana</i>        | GU396817 |
| Eudicotyledons | Fabaceae     | <i>Dalbergia</i>    | <i>Dalbergia hupeana</i>        | HQ426987 |
| Eudicotyledons | Fabaceae     | <i>Senna</i>        | <i>Senna alata</i>              | GU396790 |
| Eudicotyledons | Fabaceae     | <i>Senna</i>        | <i>Senna alata</i>              | GU969278 |
| Eudicotyledons | Fabaceae     | <i>Senna</i>        | <i>Senna alata</i>              | GQ435366 |
| Eudicotyledons | Fabaceae     | <i>Senna</i>        | <i>Senna alata</i>              | HQ161753 |
| Eudicotyledons | Polygonaceae | <i>Polygonum</i>    | <i>Polygonum chinense</i>       | GQ435161 |
| Eudicotyledons | Polygonaceae | <i>Polygonum</i>    | <i>Polygonum chinense</i>       | JN407039 |
| Eudicotyledons | Polygonaceae | <i>Polygonum</i>    | <i>Polygonum chinense</i>       | JN407040 |
| Eudicotyledons | Polygonaceae | <i>Polygonum</i>    | <i>Polygonum chinense</i>       | JN407041 |
| Eudicotyledons | Polygonaceae | <i>Polygonum</i>    | <i>Polygonum chinense</i>       | JN407042 |
| Eudicotyledons | Polygonaceae | <i>Polygonum</i>    | <i>Polygonum chinense</i>       | EU554053 |
| Eudicotyledons | Apiaceae     | <i>Osmorhiza</i>    | <i>Osmorhiza longistylis</i>    | DQ006137 |
| Eudicotyledons | Apiaceae     | <i>Osmorhiza</i>    | <i>Osmorhiza longistylis</i>    | JN045660 |
| Eudicotyledons | Apiaceae     | <i>Osmorhiza</i>    | <i>Osmorhiza longistylis</i>    | JN045661 |
| Eudicotyledons | Apiaceae     | <i>Osmorhiza</i>    | <i>Osmorhiza longistylis</i>    | JN045662 |
| Eudicotyledons | Apiaceae     | <i>Osmorhiza</i>    | <i>Osmorhiza occidentalis</i>   | JN045666 |
| Eudicotyledons | Apiaceae     | <i>Osmorhiza</i>    | <i>Osmorhiza occidentalis</i>   | JN045667 |
| Eudicotyledons | Apiaceae     | <i>Osmorhiza</i>    | <i>Osmorhiza occidentalis</i>   | JN045668 |
| Eudicotyledons | Apiaceae     | <i>Osmorhiza</i>    | <i>Osmorhiza occidentalis</i>   | JN045669 |
| Eudicotyledons | Symplocaceae | <i>Symplocos</i>    | <i>Symplocos paniculata</i>     | HQ427077 |
| Eudicotyledons | Symplocaceae | <i>Symplocos</i>    | <i>Symplocos paniculata</i>     | AB115370 |
| Eudicotyledons | Asteraceae   | <i>Solidago</i>     | <i>Solidago canadensis</i>      | EU337694 |
| Eudicotyledons | Asteraceae   | <i>Solidago</i>     | <i>Solidago canadensis</i>      | EU337695 |
| Eudicotyledons | Asteraceae   | <i>Solidago</i>     | <i>Solidago canadensis</i>      | EU337696 |
| Eudicotyledons | Asteraceae   | <i>Solidago</i>     | <i>Solidago canadensis</i>      | EU337697 |
| Eudicotyledons | Asteraceae   | <i>Solidago</i>     | <i>Solidago canadensis</i>      | EU337698 |
| Eudicotyledons | Asteraceae   | <i>Solidago</i>     | <i>Solidago canadensis</i>      | EU337699 |
| Eudicotyledons | Asteraceae   | <i>Solidago</i>     | <i>Solidago canadensis</i>      | EU337700 |
| Eudicotyledons | Asteraceae   | <i>Solidago</i>     | <i>Solidago canadensis</i>      | EU750563 |
| Eudicotyledons | Asteraceae   | <i>Solidago</i>     | <i>Solidago canadensis</i>      | EU750564 |
| Eudicotyledons | Asteraceae   | <i>Solidago</i>     | <i>Solidago canadensis</i>      | HQ142550 |
| Eudicotyledons | Asteraceae   | <i>Leucogenes</i>   | <i>Leucogenes leontopodium</i>  | EU007663 |
| Eudicotyledons | Asteraceae   | <i>Leucogenes</i>   | <i>Leucogenes leontopodium</i>  | EU007664 |
| Eudicotyledons | Asteraceae   | <i>Leucogenes</i>   | <i>Leucogenes leontopodium</i>  | AY611227 |
| Eudicotyledons | Theaceae     | <i>Schima</i>       | <i>Schima superba</i>           | HM100541 |
| Eudicotyledons | Theaceae     | <i>Schima</i>       | <i>Schima superba</i>           | HM100542 |
| Eudicotyledons | Theaceae     | <i>Schima</i>       | <i>Schima superba</i>           | HQ415477 |
| Eudicotyledons | Theaceae     | <i>Schima</i>       | <i>Schima superba</i>           | HQ427073 |
| Eudicotyledons | Theaceae     | <i>Schima</i>       | <i>Schima superba</i>           | GQ435327 |

|                |                |                      |                                    |          |
|----------------|----------------|----------------------|------------------------------------|----------|
| Eudicotyledons | Theaceae       | <i>Stewartia</i>     | <i>Stewartia pseudocamellia</i>    | HM100572 |
| Eudicotyledons | Theaceae       | <i>Stewartia</i>     | <i>Stewartia pseudocamellia</i>    | HM100573 |
| Eudicotyledons | Theaceae       | <i>Stewartia</i>     | <i>Stewartia pseudocamellia</i>    | HM100574 |
| Eudicotyledons | Theaceae       | <i>Stewartia</i>     | <i>Stewartia pseudocamellia</i>    | HM100575 |
| Eudicotyledons | Primulaceae    | <i>Primula</i>       | <i>Primula meadia</i>              | GU066767 |
| Eudicotyledons | Primulaceae    | <i>Primula</i>       | <i>Primula meadia</i>              | GU066768 |
| Eudicotyledons | Primulaceae    | <i>Primula</i>       | <i>Primula meadia</i>              | GU066769 |
| Eudicotyledons | Primulaceae    | <i>Primula</i>       | <i>Primula meadia</i>              | GU066770 |
| Eudicotyledons | Primulaceae    | <i>Primula</i>       | <i>Primula meadia</i>              | GU066771 |
| Eudicotyledons | Primulaceae    | <i>Primula</i>       | <i>Primula meadia</i>              | GU066772 |
| Eudicotyledons | Primulaceae    | <i>Primula</i>       | <i>Primula meadia</i>              | HM778141 |
| Eudicotyledons | Primulaceae    | <i>Primula</i>       | <i>Primula meadia</i>              | HM778142 |
| Eudicotyledons | Primulaceae    | <i>Primula</i>       | <i>Primula meadia</i>              | HM778143 |
| Eudicotyledons | Primulaceae    | <i>Primula</i>       | <i>Primula meadia</i>              | HM778144 |
| Eudicotyledons | Primulaceae    | <i>Primula</i>       | <i>Primula meadia</i>              | HM778146 |
| Eudicotyledons | Primulaceae    | <i>Primula</i>       | <i>Primula meadia</i>              | HM778147 |
| Eudicotyledons | Primulaceae    | <i>Primula</i>       | <i>Primula meadia</i>              | HM778148 |
| Eudicotyledons | Primulaceae    | <i>Primula</i>       | <i>Primula meadia</i>              | HM778150 |
| Eudicotyledons | Primulaceae    | <i>Primula</i>       | <i>Primula sieboldii</i>           | AB161492 |
| Eudicotyledons | Primulaceae    | <i>Primula</i>       | <i>Primula sieboldii</i>           | AB161493 |
| Eudicotyledons | Primulaceae    | <i>Primula</i>       | <i>Primula sieboldii</i>           | AB161494 |
| Eudicotyledons | Primulaceae    | <i>Primula</i>       | <i>Primula sieboldii</i>           | AB161495 |
| Eudicotyledons | Primulaceae    | <i>Primula</i>       | <i>Primula sieboldii</i>           | AB161496 |
| Eudicotyledons | Primulaceae    | <i>Primula</i>       | <i>Primula sieboldii</i>           | AB277089 |
| Eudicotyledons | Primulaceae    | <i>Primula</i>       | <i>Primula sieboldii</i>           | AB277090 |
| Eudicotyledons | Primulaceae    | <i>Primula</i>       | <i>Primula sieboldii</i>           | AB381925 |
| Eudicotyledons | Hydrangeaceae  | <i>Schizophragma</i> | <i>Schizophragma hydrangeoides</i> | HM217001 |
| Eudicotyledons | Hydrangeaceae  | <i>Schizophragma</i> | <i>Schizophragma hydrangeoides</i> | JF321271 |
| Eudicotyledons | Gesneriaceae   | <i>Cyrtandra</i>     | <i>Cyrtandra falcifolia</i>        | GQ475147 |
| Eudicotyledons | Gesneriaceae   | <i>Cyrtandra</i>     | <i>Cyrtandra falcifolia</i>        | GQ475149 |
| Eudicotyledons | Gesneriaceae   | <i>Cyrtandra</i>     | <i>Cyrtandra compressa</i>         | GQ475128 |
| Eudicotyledons | Gesneriaceae   | <i>Cyrtandra</i>     | <i>Cyrtandra compressa</i>         | EU920029 |
| Eudicotyledons | Gesneriaceae   | <i>Cyrtandra</i>     | <i>Cyrtandra pogonantha</i>        | GQ475125 |
| Eudicotyledons | Gesneriaceae   | <i>Cyrtandra</i>     | <i>Cyrtandra pogonantha</i>        | GQ475129 |
| Eudicotyledons | Gesneriaceae   | <i>Cyrtandra</i>     | <i>Cyrtandra pogonantha</i>        | EU920027 |
| Eudicotyledons | Apiaceae       | <i>Pleurospermum</i> | <i>Pleurospermum uralense</i>      | FJ475169 |
| Eudicotyledons | Apiaceae       | <i>Pleurospermum</i> | <i>Pleurospermum uralense</i>      | JN046393 |
| Eudicotyledons | Apiaceae       | <i>Pleurospermum</i> | <i>Pleurospermum uralense</i>      | JN046394 |
| Eudicotyledons | Apiaceae       | <i>Pleurospermum</i> | <i>Pleurospermum uralense</i>      | JN046395 |
| Eudicotyledons | Apiaceae       | <i>Pleurospermum</i> | <i>Pleurospermum uralense</i>      | JN046396 |
| Eudicotyledons | Apiaceae       | <i>Pleurospermum</i> | <i>Pleurospermum uralense</i>      | JN046397 |
| Eudicotyledons | Hamamelidaceae | <i>Loropetalum</i>   | <i>Loropetalum chinense</i>        | GU576774 |
| Eudicotyledons | Hamamelidaceae | <i>Loropetalum</i>   | <i>Loropetalum chinense</i>        | GU576775 |
| Eudicotyledons | Hamamelidaceae | <i>Loropetalum</i>   | <i>Loropetalum chinense</i>        | HQ427005 |
| Eudicotyledons | Hamamelidaceae | <i>Loropetalum</i>   | <i>Loropetalum chinense</i>        | JN542801 |
| Eudicotyledons | Hamamelidaceae | <i>Loropetalum</i>   | <i>Loropetalum chinense</i>        | JN542802 |
| Eudicotyledons | Hamamelidaceae | <i>Loropetalum</i>   | <i>Loropetalum chinense</i>        | JN542803 |
| Eudicotyledons | Hamamelidaceae | <i>Loropetalum</i>   | <i>Loropetalum chinense</i>        | JN542804 |
| Eudicotyledons | Hamamelidaceae | <i>Loropetalum</i>   | <i>Loropetalum chinense</i>        | JN542805 |
| Eudicotyledons | Hamamelidaceae | <i>Loropetalum</i>   | <i>Loropetalum chinense</i>        | JN542806 |
| Eudicotyledons | Hamamelidaceae | <i>Loropetalum</i>   | <i>Loropetalum chinense</i>        | JN542807 |
| Eudicotyledons | Hamamelidaceae | <i>Loropetalum</i>   | <i>Loropetalum chinense</i>        | JN542808 |
| Eudicotyledons | Hamamelidaceae | <i>Loropetalum</i>   | <i>Loropetalum chinense</i>        | JN542809 |



|                |                |                     |                              |          |
|----------------|----------------|---------------------|------------------------------|----------|
| Eudicotyledons | Hamamelidaceae | <i>Loropetalum</i>  | <i>Loropetalum chinense</i>  | JN542810 |
| Eudicotyledons | Hamamelidaceae | <i>Loropetalum</i>  | <i>Loropetalum chinense</i>  | JN542811 |
| Eudicotyledons | Hamamelidaceae | <i>Loropetalum</i>  | <i>Loropetalum chinense</i>  | JN542812 |
| Eudicotyledons | Hamamelidaceae | <i>Loropetalum</i>  | <i>Loropetalum chinense</i>  | JN542813 |
| Eudicotyledons | Hamamelidaceae | <i>Loropetalum</i>  | <i>Loropetalum chinense</i>  | JN542814 |
| Eudicotyledons | Hamamelidaceae | <i>Loropetalum</i>  | <i>Loropetalum chinense</i>  | JN542815 |
| Eudicotyledons | Hamamelidaceae | <i>Loropetalum</i>  | <i>Loropetalum chinense</i>  | JN542816 |
| Eudicotyledons | Hamamelidaceae | <i>Loropetalum</i>  | <i>Loropetalum chinense</i>  | JN542817 |
| Eudicotyledons | Hamamelidaceae | <i>Loropetalum</i>  | <i>Loropetalum chinense</i>  | JN542818 |
| Eudicotyledons | Hamamelidaceae | <i>Loropetalum</i>  | <i>Loropetalum chinense</i>  | JN542819 |
| Eudicotyledons | Hamamelidaceae | <i>Loropetalum</i>  | <i>Loropetalum chinense</i>  | JN542820 |
| Eudicotyledons | Hamamelidaceae | <i>Loropetalum</i>  | <i>Loropetalum chinense</i>  | JN542821 |
| Eudicotyledons | Hamamelidaceae | <i>Loropetalum</i>  | <i>Loropetalum chinense</i>  | JN542822 |
| Eudicotyledons | Hamamelidaceae | <i>Loropetalum</i>  | <i>Loropetalum chinense</i>  | JN542823 |
| Eudicotyledons | Hamamelidaceae | <i>Loropetalum</i>  | <i>Loropetalum chinense</i>  | JN542824 |
| Eudicotyledons | Hamamelidaceae | <i>Loropetalum</i>  | <i>Loropetalum chinense</i>  | JN542825 |
| Eudicotyledons | Hamamelidaceae | <i>Loropetalum</i>  | <i>Loropetalum chinense</i>  | JN542826 |
| Eudicotyledons | Hamamelidaceae | <i>Loropetalum</i>  | <i>Loropetalum chinense</i>  | JN542827 |
| Eudicotyledons | Hamamelidaceae | <i>Loropetalum</i>  | <i>Loropetalum chinense</i>  | JN542828 |
| Eudicotyledons | Hamamelidaceae | <i>Loropetalum</i>  | <i>Loropetalum chinense</i>  | AB237078 |
| Eudicotyledons | Fabaceae       | <i>Vachellia</i>    | <i>Vachellia farnesiana</i>  | AF195723 |
| Eudicotyledons | Fabaceae       | <i>Vachellia</i>    | <i>Vachellia farnesiana</i>  | FJ808541 |
| Eudicotyledons | Fabaceae       | <i>Vachellia</i>    | <i>Vachellia farnesiana</i>  | FJ808542 |
| Eudicotyledons | Fabaceae       | <i>Vachellia</i>    | <i>Vachellia farnesiana</i>  | FJ808543 |
| Eudicotyledons | Fabaceae       | <i>Vachellia</i>    | <i>Vachellia farnesiana</i>  | FJ808544 |
| Eudicotyledons | Fabaceae       | <i>Vachellia</i>    | <i>Vachellia farnesiana</i>  | FJ808545 |
| Eudicotyledons | Fabaceae       | <i>Vachellia</i>    | <i>Vachellia farnesiana</i>  | FJ808546 |
| Eudicotyledons | Fabaceae       | <i>Vachellia</i>    | <i>Vachellia farnesiana</i>  | FJ808547 |
| Eudicotyledons | Fabaceae       | <i>Vachellia</i>    | <i>Vachellia farnesiana</i>  | FJ808548 |
| Eudicotyledons | Fabaceae       | <i>Vachellia</i>    | <i>Vachellia farnesiana</i>  | FJ808549 |
| Eudicotyledons | Fabaceae       | <i>Vachellia</i>    | <i>Vachellia farnesiana</i>  | FJ808550 |
| Eudicotyledons | Fabaceae       | <i>Vachellia</i>    | <i>Vachellia farnesiana</i>  | FJ808551 |
| Eudicotyledons | Fabaceae       | <i>Vachellia</i>    | <i>Vachellia farnesiana</i>  | FJ808552 |
| Eudicotyledons | Fabaceae       | <i>Vachellia</i>    | <i>Vachellia farnesiana</i>  | FJ808553 |
| Eudicotyledons | Fabaceae       | <i>Vachellia</i>    | <i>Vachellia farnesiana</i>  | FJ808554 |
| Eudicotyledons | Fabaceae       | <i>Senna</i>        | <i>Senna alexandrina</i>     | JF838365 |
| Eudicotyledons | Fabaceae       | <i>Senna</i>        | <i>Senna alexandrina</i>     | HQ161771 |
| Eudicotyledons | Fabaceae       | <i>Glycyrrhiza</i>  | <i>Glycyrrhiza uralensis</i> | GU396733 |
| Eudicotyledons | Fabaceae       | <i>Glycyrrhiza</i>  | <i>Glycyrrhiza uralensis</i> | GU396734 |
| Eudicotyledons | Fabaceae       | <i>Glycyrrhiza</i>  | <i>Glycyrrhiza uralensis</i> | GU396735 |
| Eudicotyledons | Fabaceae       | <i>Glycyrrhiza</i>  | <i>Glycyrrhiza uralensis</i> | AB649776 |
| Eudicotyledons | Brassicaceae   | <i>Cardamine</i>    | <i>Cardamine impatiens</i>   | JN044162 |
| Eudicotyledons | Brassicaceae   | <i>Cardamine</i>    | <i>Cardamine impatiens</i>   | JN044163 |
| Eudicotyledons | Brassicaceae   | <i>Cardamine</i>    | <i>Cardamine impatiens</i>   | JN044164 |
| Eudicotyledons | Brassicaceae   | <i>Cardamine</i>    | <i>Cardamine impatiens</i>   | JN044165 |
| Eudicotyledons | Brassicaceae   | <i>Cardamine</i>    | <i>Cardamine impatiens</i>   | JN044166 |
| Eudicotyledons | Gentianaceae   | <i>Gentianopsis</i> | <i>Gentianopsis crinita</i>  | HM460854 |
| Eudicotyledons | Gentianaceae   | <i>Gentianopsis</i> | <i>Gentianopsis crinita</i>  | HM460855 |
| Eudicotyledons | Gentianaceae   | <i>Gentianopsis</i> | <i>Gentianopsis crinita</i>  | HM460856 |
| Eudicotyledons | Ranunculaceae  | <i>Aconitum</i>     | <i>Aconitum carmichaelii</i> | GQ337742 |
| Eudicotyledons | Ranunculaceae  | <i>Aconitum</i>     | <i>Aconitum carmichaelii</i> | GQ337743 |
| Eudicotyledons | Ranunculaceae  | <i>Aconitum</i>     | <i>Aconitum carmichaelii</i> | GQ337744 |
| Eudicotyledons | Ranunculaceae  | <i>Aconitum</i>     | <i>Aconitum carmichaelii</i> | GQ337745 |

|                |                |                   |                              |          |
|----------------|----------------|-------------------|------------------------------|----------|
| Eudicotyledons | Ranunculaceae  | <i>Aconitum</i>   | <i>Aconitum carmichaelii</i> | GQ337746 |
| Eudicotyledons | Ranunculaceae  | <i>Aconitum</i>   | <i>Aconitum carmichaelii</i> | GQ337747 |
| Eudicotyledons | Ranunculaceae  | <i>Aconitum</i>   | <i>Aconitum carmichaelii</i> | GQ337748 |
| Eudicotyledons | Ranunculaceae  | <i>Aconitum</i>   | <i>Aconitum carmichaelii</i> | GQ337749 |
| Eudicotyledons | Ranunculaceae  | <i>Aconitum</i>   | <i>Aconitum carmichaelii</i> | GQ337750 |
| Eudicotyledons | Ranunculaceae  | <i>Aconitum</i>   | <i>Aconitum carmichaelii</i> | GQ337765 |
| Eudicotyledons | Ranunculaceae  | <i>Aconitum</i>   | <i>Aconitum carmichaelii</i> | GQ337766 |
| Eudicotyledons | Ranunculaceae  | <i>Aconitum</i>   | <i>Aconitum carmichaelii</i> | GQ337767 |
| Eudicotyledons | Ranunculaceae  | <i>Aconitum</i>   | <i>Aconitum carmichaelii</i> | GQ337768 |
| Eudicotyledons | Ranunculaceae  | <i>Aconitum</i>   | <i>Aconitum carmichaelii</i> | GQ337769 |
| Eudicotyledons | Ranunculaceae  | <i>Aconitum</i>   | <i>Aconitum carmichaelii</i> | GQ337770 |
| Eudicotyledons | Ranunculaceae  | <i>Aconitum</i>   | <i>Aconitum carmichaelii</i> | GQ337771 |
| Eudicotyledons | Ranunculaceae  | <i>Aconitum</i>   | <i>Aconitum carmichaelii</i> | GQ337772 |
| Eudicotyledons | Ranunculaceae  | <i>Aconitum</i>   | <i>Aconitum carmichaelii</i> | GQ337773 |
| Eudicotyledons | Ranunculaceae  | <i>Aconitum</i>   | <i>Aconitum carmichaelii</i> | GQ337778 |
| Eudicotyledons | Ranunculaceae  | <i>Aconitum</i>   | <i>Aconitum carmichaelii</i> | GQ337810 |
| Eudicotyledons | Ranunculaceae  | <i>Aconitum</i>   | <i>Aconitum carmichaelii</i> | GQ337811 |
| Eudicotyledons | Ranunculaceae  | <i>Aconitum</i>   | <i>Aconitum carmichaelii</i> | GQ337823 |
| Eudicotyledons | Ranunculaceae  | <i>Aconitum</i>   | <i>Aconitum carmichaelii</i> | GQ337850 |
| Eudicotyledons | Ranunculaceae  | <i>Aconitum</i>   | <i>Aconitum carmichaelii</i> | GQ337851 |
| Eudicotyledons | Ranunculaceae  | <i>Aconitum</i>   | <i>Aconitum carmichaelii</i> | GQ337852 |
| Eudicotyledons | Ranunculaceae  | <i>Aconitum</i>   | <i>Aconitum carmichaelii</i> | GQ337853 |
| Eudicotyledons | Ranunculaceae  | <i>Aconitum</i>   | <i>Aconitum carmichaelii</i> | FJ821166 |
| Eudicotyledons | Ranunculaceae  | <i>Aconitum</i>   | <i>Aconitum carmichaelii</i> | FJ821167 |
| Eudicotyledons | Asteraceae     | <i>Taraxacum</i>  | <i>Taraxacum mongolicum</i>  | HQ436189 |
| Eudicotyledons | Asteraceae     | <i>Taraxacum</i>  | <i>Taraxacum mongolicum</i>  | JN406943 |
| Eudicotyledons | Asteraceae     | <i>Taraxacum</i>  | <i>Taraxacum mongolicum</i>  | JN406944 |
| Eudicotyledons | Asteraceae     | <i>Taraxacum</i>  | <i>Taraxacum mongolicum</i>  | JN406945 |
| Eudicotyledons | Asteraceae     | <i>Taraxacum</i>  | <i>Taraxacum mongolicum</i>  | JN406946 |
| Eudicotyledons | Asteraceae     | <i>Craspedia</i>  | <i>Craspedia aurantia</i>    | EF187709 |
| Eudicotyledons | Asteraceae     | <i>Craspedia</i>  | <i>Craspedia aurantia</i>    | EF187716 |
| Eudicotyledons | Asteraceae     | <i>Leucogenes</i> | <i>Leucogenes grandiceps</i> | EU007658 |
| Eudicotyledons | Asteraceae     | <i>Leucogenes</i> | <i>Leucogenes grandiceps</i> | EU007659 |
| Eudicotyledons | Asteraceae     | <i>Leucogenes</i> | <i>Leucogenes grandiceps</i> | EU007661 |
| Eudicotyledons | Asteraceae     | <i>Leucogenes</i> | <i>Leucogenes grandiceps</i> | EU007662 |
| Eudicotyledons | Asteraceae     | <i>Leucogenes</i> | <i>Leucogenes grandiceps</i> | EU007669 |
| Eudicotyledons | Asteraceae     | <i>Leucogenes</i> | <i>Leucogenes grandiceps</i> | EU007670 |
| Eudicotyledons | Asteraceae     | <i>Leucogenes</i> | <i>Leucogenes grandiceps</i> | EU007671 |
| Eudicotyledons | Asteraceae     | <i>Leucogenes</i> | <i>Leucogenes grandiceps</i> | AY611224 |
| Eudicotyledons | Polygonaceae   | <i>Persicaria</i> | <i>Persicaria tinctoria</i>  | EU554055 |
| Eudicotyledons | Polygonaceae   | <i>Persicaria</i> | <i>Persicaria tinctoria</i>  | EU197005 |
| Eudicotyledons | Caprifoliaceae | <i>Lonicera</i>   | <i>Lonicera japonica</i>     | GU135313 |
| Eudicotyledons | Caprifoliaceae | <i>Lonicera</i>   | <i>Lonicera japonica</i>     | JN045252 |
| Eudicotyledons | Caprifoliaceae | <i>Lonicera</i>   | <i>Lonicera japonica</i>     | JN045253 |
| Eudicotyledons | Caprifoliaceae | <i>Lonicera</i>   | <i>Lonicera japonica</i>     | JN045254 |
| Eudicotyledons | Caprifoliaceae | <i>Lonicera</i>   | <i>Lonicera japonica</i>     | HM228536 |
| Eudicotyledons | Caprifoliaceae | <i>Lonicera</i>   | <i>Lonicera japonica</i>     | HM228537 |
| Eudicotyledons | Caprifoliaceae | <i>Lonicera</i>   | <i>Lonicera japonica</i>     | HM228538 |
| Eudicotyledons | Caprifoliaceae | <i>Lonicera</i>   | <i>Lonicera japonica</i>     | HM228539 |
| Eudicotyledons | Caprifoliaceae | <i>Lonicera</i>   | <i>Lonicera japonica</i>     | HM228540 |
| Eudicotyledons | Caprifoliaceae | <i>Lonicera</i>   | <i>Lonicera japonica</i>     | HM228541 |
| Eudicotyledons | Caprifoliaceae | <i>Lonicera</i>   | <i>Lonicera japonica</i>     | HM228542 |
| Eudicotyledons | Caprifoliaceae | <i>Lonicera</i>   | <i>Lonicera japonica</i>     | HM228543 |

|                |                |                   |                                  |          |
|----------------|----------------|-------------------|----------------------------------|----------|
| Eudicotyledons | Apiaceae       | <i>Osmorhiza</i>  | <i>Osmorhiza claytonii</i>       | HQ596776 |
| Eudicotyledons | Apiaceae       | <i>Osmorhiza</i>  | <i>Osmorhiza claytonii</i>       | JN045650 |
| Eudicotyledons | Apiaceae       | <i>Osmorhiza</i>  | <i>Osmorhiza claytonii</i>       | JN045651 |
| Eudicotyledons | Fabaceae       | <i>Dalbergia</i>  | <i>Dalbergia cochinchinensis</i> | FR854148 |
| Eudicotyledons | Fabaceae       | <i>Dalbergia</i>  | <i>Dalbergia cochinchinensis</i> | FR854149 |
| Eudicotyledons | Fabaceae       | <i>Dalbergia</i>  | <i>Dalbergia cochinchinensis</i> | FR854150 |
| Eudicotyledons | Fabaceae       | <i>Dalbergia</i>  | <i>Dalbergia cochinchinensis</i> | FR854151 |
| Eudicotyledons | Fabaceae       | <i>Dalbergia</i>  | <i>Dalbergia cochinchinensis</i> | FR854152 |
| Eudicotyledons | Fabaceae       | <i>Dalbergia</i>  | <i>Dalbergia sissoo</i>          | GU396738 |
| Eudicotyledons | Fabaceae       | <i>Dalbergia</i>  | <i>Dalbergia sissoo</i>          | GU135327 |
| Eudicotyledons | Apiaceae       | <i>Osmorhiza</i>  | <i>Osmorhiza brachypoda</i>      | JN045648 |
| Eudicotyledons | Apiaceae       | <i>Osmorhiza</i>  | <i>Osmorhiza brachypoda</i>      | JN045649 |
| Eudicotyledons | Apiaceae       | <i>Osmorhiza</i>  | <i>Osmorhiza depauperata</i>     | JN045652 |
| Eudicotyledons | Apiaceae       | <i>Osmorhiza</i>  | <i>Osmorhiza depauperata</i>     | JN045653 |
| Eudicotyledons | Apiaceae       | <i>Osmorhiza</i>  | <i>Osmorhiza depauperata</i>     | JN045654 |
| Eudicotyledons | Apiaceae       | <i>Osmorhiza</i>  | <i>Osmorhiza depauperata</i>     | JN045655 |
| Eudicotyledons | Brassicaceae   | <i>Cardamine</i>  | <i>Cardamine macrophylla</i>     | JN044167 |
| Eudicotyledons | Brassicaceae   | <i>Cardamine</i>  | <i>Cardamine macrophylla</i>     | JN044168 |
| Eudicotyledons | Primulaceae    | <i>Primula</i>    | <i>Primula sikkimensis</i>       | JN046577 |
| Eudicotyledons | Primulaceae    | <i>Primula</i>    | <i>Primula sikkimensis</i>       | JN046578 |
| Eudicotyledons | Primulaceae    | <i>Primula</i>    | <i>Primula sikkimensis</i>       | JN046579 |
| Eudicotyledons | Primulaceae    | <i>Primula</i>    | <i>Primula sikkimensis</i>       | JN046580 |
| Eudicotyledons | Primulaceae    | <i>Primula</i>    | <i>Primula sikkimensis</i>       | JN046581 |
| Eudicotyledons | Primulaceae    | <i>Lysimachia</i> | <i>Lysimachia congestiflora</i>  | JN045311 |
| Eudicotyledons | Primulaceae    | <i>Lysimachia</i> | <i>Lysimachia congestiflora</i>  | JN045312 |
| Eudicotyledons | Primulaceae    | <i>Lysimachia</i> | <i>Lysimachia congestiflora</i>  | JN045313 |
| Eudicotyledons | Primulaceae    | <i>Lysimachia</i> | <i>Lysimachia congestiflora</i>  | JN045314 |
| Eudicotyledons | Primulaceae    | <i>Lysimachia</i> | <i>Lysimachia congestiflora</i>  | JN045315 |
| Eudicotyledons | Caprifoliaceae | <i>Lonicera</i>   | <i>Lonicera dasystyla</i>        | GQ435289 |
| Eudicotyledons | Caprifoliaceae | <i>Lonicera</i>   | <i>Lonicera dasystyla</i>        | HM228544 |
| Eudicotyledons | Caprifoliaceae | <i>Lonicera</i>   | <i>Lonicera dasystyla</i>        | HM228545 |
| Eudicotyledons | Caprifoliaceae | <i>Lonicera</i>   | <i>Lonicera similis</i>          | HM228546 |
| Eudicotyledons | Caprifoliaceae | <i>Lonicera</i>   | <i>Lonicera similis</i>          | HM228547 |
| Eudicotyledons | Caprifoliaceae | <i>Lonicera</i>   | <i>Lonicera similis</i>          | HM228548 |
| Eudicotyledons | Caprifoliaceae | <i>Lonicera</i>   | <i>Lonicera similis</i>          | HM228549 |
| Eudicotyledons | Ranunculaceae  | <i>Aconitum</i>   | <i>Aconitum anthora</i>          | AF216570 |
| Eudicotyledons | Ranunculaceae  | <i>Aconitum</i>   | <i>Aconitum anthora</i>          | FN675821 |
| Eudicotyledons | Ranunculaceae  | <i>Aconitum</i>   | <i>Aconitum lycoctonum</i>       | AF216560 |
| Eudicotyledons | Ranunculaceae  | <i>Aconitum</i>   | <i>Aconitum lycoctonum</i>       | AF216561 |
| Eudicotyledons | Ranunculaceae  | <i>Aconitum</i>   | <i>Aconitum lycoctonum</i>       | AF216562 |
| Eudicotyledons | Ranunculaceae  | <i>Aconitum</i>   | <i>Aconitum lycoctonum</i>       | AF216563 |
| Eudicotyledons | Ranunculaceae  | <i>Aconitum</i>   | <i>Aconitum lycoctonum</i>       | AF216564 |
| Eudicotyledons | Ranunculaceae  | <i>Aconitum</i>   | <i>Aconitum lycoctonum</i>       | AF216565 |
| Eudicotyledons | Ranunculaceae  | <i>Aconitum</i>   | <i>Aconitum lycoctonum</i>       | AF216566 |
| Eudicotyledons | Ranunculaceae  | <i>Aconitum</i>   | <i>Aconitum lycoctonum</i>       | AF216568 |
| Eudicotyledons | Ranunculaceae  | <i>Aconitum</i>   | <i>Aconitum lycoctonum</i>       | AF216569 |
| Eudicotyledons | Ranunculaceae  | <i>Aconitum</i>   | <i>Aconitum lycoctonum</i>       | AF216571 |
| Eudicotyledons | Ranunculaceae  | <i>Aconitum</i>   | <i>Aconitum lycoctonum</i>       | AF216573 |
| Eudicotyledons | Ranunculaceae  | <i>Aconitum</i>   | <i>Aconitum lycoctonum</i>       | AF216574 |
| Eudicotyledons | Ranunculaceae  | <i>Aconitum</i>   | <i>Aconitum lycoctonum</i>       | FN675818 |
| Eudicotyledons | Ranunculaceae  | <i>Aconitum</i>   | <i>Aconitum moldavicum</i>       | AF216558 |
| Eudicotyledons | Ranunculaceae  | <i>Aconitum</i>   | <i>Aconitum moldavicum</i>       | AF216577 |
| Eudicotyledons | Ranunculaceae  | <i>Aconitum</i>   | <i>Aconitum napellus</i>         | AF216567 |

|                |               |                     |                                |          |
|----------------|---------------|---------------------|--------------------------------|----------|
| Eudicotyledons | Ranunculaceae | <i>Aconitum</i>     | <i>Aconitum napellus</i>       | FN675819 |
| Eudicotyledons | Ranunculaceae | <i>Aconitum</i>     | <i>Aconitum septentrionale</i> | AF216575 |
| Eudicotyledons | Ranunculaceae | <i>Aconitum</i>     | <i>Aconitum septentrionale</i> | AF216576 |
| Eudicotyledons | Fabaceae      | <i>Andira</i>       | <i>Andira aubletii</i>         | GQ428688 |
| Eudicotyledons | Fabaceae      | <i>Andira</i>       | <i>Andira aubletii</i>         | GQ428766 |
| Eudicotyledons | Fabaceae      | <i>Andira</i>       | <i>Andira aubletii</i>         | FJ038928 |
| Eudicotyledons | Asteraceae    | <i>Craspedia</i>    | <i>Craspedia variabilis</i>    | EF187694 |
| Eudicotyledons | Asteraceae    | <i>Craspedia</i>    | <i>Craspedia variabilis</i>    | EF187708 |
| Eudicotyledons | Fabaceae      | <i>Senna</i>        | <i>Senna occidentalis</i>      | GU396776 |
| Eudicotyledons | Fabaceae      | <i>Senna</i>        | <i>Senna occidentalis</i>      | GU969280 |
| Eudicotyledons | Fabaceae      | <i>Senna</i>        | <i>Senna occidentalis</i>      | HQ161765 |
| Eudicotyledons | Ranunculaceae | <i>Delphinium</i>   | <i>Delphinium delavayi</i>     | JN044402 |
| Eudicotyledons | Ranunculaceae | <i>Delphinium</i>   | <i>Delphinium delavayi</i>     | JN044403 |
| Eudicotyledons | Rosaceae      | <i>Sanguisorba</i>  | <i>Sanguisorba minor</i>       | FR865111 |
| Eudicotyledons | Rosaceae      | <i>Sanguisorba</i>  | <i>Sanguisorba minor</i>       | EU937564 |
| Eudicotyledons | Rosaceae      | <i>Sanguisorba</i>  | <i>Sanguisorba officinalis</i> | GQ435245 |
| Eudicotyledons | Rosaceae      | <i>Sanguisorba</i>  | <i>Sanguisorba officinalis</i> | GQ435246 |
| Eudicotyledons | Rosaceae      | <i>Sanguisorba</i>  | <i>Sanguisorba officinalis</i> | GQ435247 |
| Eudicotyledons | Rosaceae      | <i>Sanguisorba</i>  | <i>Sanguisorba officinalis</i> | EU937565 |
| Eudicotyledons | Polygonaceae  | <i>Persicaria</i>   | <i>Persicaria posumbu</i>      | EF653752 |
| Eudicotyledons | Polygonaceae  | <i>Persicaria</i>   | <i>Persicaria posumbu</i>      | EU196996 |
| Eudicotyledons | Polygonaceae  | <i>Persicaria</i>   | <i>Persicaria posumbu</i>      | DQ006216 |
| Eudicotyledons | Polygonaceae  | <i>Persicaria</i>   | <i>Persicaria punctata</i>     | EF653757 |
| Eudicotyledons | Polygonaceae  | <i>Persicaria</i>   | <i>Persicaria punctata</i>     | EU196998 |
| Eudicotyledons | Polygonaceae  | <i>Polygonum</i>    | <i>Polygonum aviculare</i>     | FJ395458 |
| Eudicotyledons | Polygonaceae  | <i>Polygonum</i>    | <i>Polygonum aviculare</i>     | EF653735 |
| Eudicotyledons | Polygonaceae  | <i>Polygonum</i>    | <i>Polygonum aviculare</i>     | FJ503034 |
| Eudicotyledons | Polygonaceae  | <i>Polygonum</i>    | <i>Polygonum aviculare</i>     | EU750484 |
| Eudicotyledons | Polygonaceae  | <i>Polygonum</i>    | <i>Polygonum aviculare</i>     | EU750485 |
| Eudicotyledons | Polygonaceae  | <i>Polygonum</i>    | <i>Polygonum aviculare</i>     | EU750486 |
| Eudicotyledons | Polygonaceae  | <i>Polygonum</i>    | <i>Polygonum aviculare</i>     | EU750487 |
| Eudicotyledons | Fabaceae      | <i>Vachellia</i>    | <i>Vachellia constricta</i>    | AF524989 |
| Eudicotyledons | Fabaceae      | <i>Vachellia</i>    | <i>Vachellia constricta</i>    | EU811987 |
| Eudicotyledons | Malvaceae     | <i>Lavatera</i>     | <i>Lavatera olbia</i>          | EF419561 |
| Eudicotyledons | Malvaceae     | <i>Lavatera</i>     | <i>Lavatera olbia</i>          | EF419562 |
| Eudicotyledons | Malvaceae     | <i>Lavatera</i>     | <i>Lavatera phoenicea</i>      | EF419644 |
| Eudicotyledons | Malvaceae     | <i>Lavatera</i>     | <i>Lavatera phoenicea</i>      | EF419645 |
| Eudicotyledons | Malvaceae     | <i>Lavatera</i>     | <i>Lavatera phoenicea</i>      | EF419646 |
| Eudicotyledons | Malvaceae     | <i>Lavatera</i>     | <i>Lavatera trimestris</i>     | EF419568 |
| Eudicotyledons | Malvaceae     | <i>Lavatera</i>     | <i>Lavatera trimestris</i>     | EF419569 |
| Eudicotyledons | Malvaceae     | <i>Lavatera</i>     | <i>Lavatera trimestris</i>     | EF419570 |
| Eudicotyledons | Malvaceae     | <i>Lavatera</i>     | <i>Lavatera trimestris</i>     | EF419571 |
| Eudicotyledons | Primulaceae   | <i>Primula</i>      | <i>Primula bulleyana</i>       | HM018480 |
| Eudicotyledons | Primulaceae   | <i>Primula</i>      | <i>Primula bulleyana</i>       | HM018481 |
| Eudicotyledons | Primulaceae   | <i>Primula</i>      | <i>Primula bulleyana</i>       | HM018482 |
| Eudicotyledons | Primulaceae   | <i>Primula</i>      | <i>Primula bulleyana</i>       | HM018483 |
| Eudicotyledons | Primulaceae   | <i>Primula</i>      | <i>Primula bulleyana</i>       | HM018484 |
| Eudicotyledons | Theaceae      | <i>Stewartia</i>    | <i>Stewartia ovata</i>         | HM100567 |
| Eudicotyledons | Theaceae      | <i>Stewartia</i>    | <i>Stewartia ovata</i>         | HM100568 |
| Eudicotyledons | Theaceae      | <i>Stewartia</i>    | <i>Stewartia ovata</i>         | HM100569 |
| Eudicotyledons | Theaceae      | <i>Stewartia</i>    | <i>Stewartia ovata</i>         | HM100570 |
| Eudicotyledons | Apocynaceae   | <i>Vincetoxicum</i> | <i>Vincetoxicum atratum</i>    | GQ435173 |
| Eudicotyledons | Apocynaceae   | <i>Vincetoxicum</i> | <i>Vincetoxicum atratum</i>    | AB109148 |

|                |             |                    |                               |          |
|----------------|-------------|--------------------|-------------------------------|----------|
| Eudicotyledons | Primulaceae | <i>Primula</i>     | <i>Primula secundiflora</i>   | HM018499 |
| Eudicotyledons | Primulaceae | <i>Primula</i>     | <i>Primula secundiflora</i>   | HM018500 |
| Eudicotyledons | Primulaceae | <i>Primula</i>     | <i>Primula secundiflora</i>   | HM018501 |
| Eudicotyledons | Primulaceae | <i>Primula</i>     | <i>Primula secundiflora</i>   | HM018502 |
| Eudicotyledons | Primulaceae | <i>Primula</i>     | <i>Primula secundiflora</i>   | HM018503 |
| Eudicotyledons | Primulaceae | <i>Primula</i>     | <i>Primula secundiflora</i>   | HM018504 |
| Eudicotyledons | Primulaceae | <i>Primula</i>     | <i>Primula secundiflora</i>   | HM018505 |
| Eudicotyledons | Primulaceae | <i>Primula</i>     | <i>Primula secundiflora</i>   | HM018506 |
| Eudicotyledons | Primulaceae | <i>Primula</i>     | <i>Primula secundiflora</i>   | HM018507 |
| Eudicotyledons | Primulaceae | <i>Primula</i>     | <i>Primula secundiflora</i>   | HM018508 |
| Eudicotyledons | Primulaceae | <i>Primula</i>     | <i>Primula secundiflora</i>   | HM018509 |
| Eudicotyledons | Primulaceae | <i>Primula</i>     | <i>Primula secundiflora</i>   | HM018510 |
| Eudicotyledons | Primulaceae | <i>Primula</i>     | <i>Primula secundiflora</i>   | HM018511 |
| Eudicotyledons | Fabaceae    | <i>Caesalpinia</i> | <i>Caesalpinia pannosa</i>    | DQ501959 |
| Eudicotyledons | Fabaceae    | <i>Caesalpinia</i> | <i>Caesalpinia pannosa</i>    | DQ208844 |
| Eudicotyledons | Fabaceae    | <i>Caesalpinia</i> | <i>Caesalpinia pannosa</i>    | DQ208845 |
| Eudicotyledons | Fabaceae    | <i>Caesalpinia</i> | <i>Caesalpinia pannosa</i>    | DQ208846 |
| Eudicotyledons | Fabaceae    | <i>Caesalpinia</i> | <i>Caesalpinia pannosa</i>    | DQ208847 |
| Eudicotyledons | Fabaceae    | <i>Caesalpinia</i> | <i>Caesalpinia pannosa</i>    | DQ208848 |
| Eudicotyledons | Fabaceae    | <i>Caesalpinia</i> | <i>Caesalpinia pannosa</i>    | DQ208849 |
| Eudicotyledons | Fabaceae    | <i>Caesalpinia</i> | <i>Caesalpinia pannosa</i>    | DQ208850 |
| Eudicotyledons | Fabaceae    | <i>Caesalpinia</i> | <i>Caesalpinia pannosa</i>    | DQ208851 |
| Eudicotyledons | Fabaceae    | <i>Caesalpinia</i> | <i>Caesalpinia pannosa</i>    | DQ208852 |
| Eudicotyledons | Fabaceae    | <i>Caesalpinia</i> | <i>Caesalpinia pannosa</i>    | DQ208853 |
| Eudicotyledons | Fabaceae    | <i>Caesalpinia</i> | <i>Caesalpinia pannosa</i>    | DQ208854 |
| Eudicotyledons | Fabaceae    | <i>Caesalpinia</i> | <i>Caesalpinia pannosa</i>    | DQ208855 |
| Eudicotyledons | Fabaceae    | <i>Senna</i>       | <i>Senna hirsuta</i>          | JF838362 |
| Eudicotyledons | Fabaceae    | <i>Senna</i>       | <i>Senna hirsuta</i>          | HQ161764 |
| Eudicotyledons | Primulaceae | <i>Primula</i>     | <i>Primula poissonii</i>      | HM018485 |
| Eudicotyledons | Primulaceae | <i>Primula</i>     | <i>Primula poissonii</i>      | HM018486 |
| Eudicotyledons | Primulaceae | <i>Primula</i>     | <i>Primula poissonii</i>      | HM018487 |
| Eudicotyledons | Primulaceae | <i>Primula</i>     | <i>Primula poissonii</i>      | HM018488 |
| Eudicotyledons | Primulaceae | <i>Primula</i>     | <i>Primula poissonii</i>      | HM018489 |
| Eudicotyledons | Primulaceae | <i>Primula</i>     | <i>Primula poissonii</i>      | HM018490 |
| Eudicotyledons | Primulaceae | <i>Primula</i>     | <i>Primula poissonii</i>      | HM018491 |
| Eudicotyledons | Primulaceae | <i>Primula</i>     | <i>Primula poissonii</i>      | HM018492 |
| Eudicotyledons | Primulaceae | <i>Primula</i>     | <i>Primula poissonii</i>      | HM018493 |
| Eudicotyledons | Primulaceae | <i>Primula</i>     | <i>Primula poissonii</i>      | HM018494 |
| Eudicotyledons | Primulaceae | <i>Primula</i>     | <i>Primula poissonii</i>      | HM018495 |
| Eudicotyledons | Primulaceae | <i>Primula</i>     | <i>Primula poissonii</i>      | HM018496 |
| Eudicotyledons | Primulaceae | <i>Primula</i>     | <i>Primula poissonii</i>      | HM018497 |
| Eudicotyledons | Primulaceae | <i>Primula</i>     | <i>Primula poissonii</i>      | HM018498 |
| Eudicotyledons | Primulaceae | <i>Lysimachia</i>  | <i>Lysimachia clethroides</i> | JN045306 |
| Eudicotyledons | Primulaceae | <i>Lysimachia</i>  | <i>Lysimachia clethroides</i> | JN045307 |
| Eudicotyledons | Primulaceae | <i>Lysimachia</i>  | <i>Lysimachia clethroides</i> | JN045308 |
| Eudicotyledons | Primulaceae | <i>Lysimachia</i>  | <i>Lysimachia clethroides</i> | JN045309 |
| Eudicotyledons | Primulaceae | <i>Lysimachia</i>  | <i>Lysimachia clethroides</i> | JN045310 |
| Eudicotyledons | Primulaceae | <i>Primula</i>     | <i>Primula obconica</i>       | JN046547 |
| Eudicotyledons | Primulaceae | <i>Primula</i>     | <i>Primula obconica</i>       | JN046548 |
| Eudicotyledons | Primulaceae | <i>Primula</i>     | <i>Primula obconica</i>       | JN046549 |
| Eudicotyledons | Primulaceae | <i>Primula</i>     | <i>Primula sinensis</i>       | JN046582 |
| Eudicotyledons | Primulaceae | <i>Primula</i>     | <i>Primula sinensis</i>       | JN046583 |
| Eudicotyledons | Primulaceae | <i>Primula</i>     | <i>Primula sinensis</i>       | JN046584 |

|                |                |                   |                                 |          |
|----------------|----------------|-------------------|---------------------------------|----------|
| Eudicotyledons | Apiaceae       | <i>Osmorhiza</i>  | <i>Osmorhiza berteroi</i>       | JN045641 |
| Eudicotyledons | Apiaceae       | <i>Osmorhiza</i>  | <i>Osmorhiza berteroi</i>       | JN045642 |
| Eudicotyledons | Apiaceae       | <i>Osmorhiza</i>  | <i>Osmorhiza berteroi</i>       | JN045643 |
| Eudicotyledons | Apiaceae       | <i>Osmorhiza</i>  | <i>Osmorhiza berteroi</i>       | JN045644 |
| Eudicotyledons | Apiaceae       | <i>Osmorhiza</i>  | <i>Osmorhiza berteroi</i>       | JN045645 |
| Eudicotyledons | Apiaceae       | <i>Osmorhiza</i>  | <i>Osmorhiza berteroi</i>       | JN045646 |
| Eudicotyledons | Apiaceae       | <i>Osmorhiza</i>  | <i>Osmorhiza berteroi</i>       | JN045647 |
| Eudicotyledons | Apiaceae       | <i>Osmorhiza</i>  | <i>Osmorhiza glabrata</i>       | JN045656 |
| Eudicotyledons | Apiaceae       | <i>Osmorhiza</i>  | <i>Osmorhiza glabrata</i>       | JN045657 |
| Eudicotyledons | Apiaceae       | <i>Osmorhiza</i>  | <i>Osmorhiza glabrata</i>       | JN045658 |
| Eudicotyledons | Apiaceae       | <i>Osmorhiza</i>  | <i>Osmorhiza glabrata</i>       | JN045659 |
| Eudicotyledons | Primulaceae    | <i>Primula</i>    | <i>Primula bellidifolia</i>     | JN046474 |
| Eudicotyledons | Primulaceae    | <i>Primula</i>    | <i>Primula bellidifolia</i>     | JN046475 |
| Eudicotyledons | Primulaceae    | <i>Primula</i>    | <i>Primula bellidifolia</i>     | JN046476 |
| Eudicotyledons | Primulaceae    | <i>Primula</i>    | <i>Primula calderiana</i>       | JN046486 |
| Eudicotyledons | Primulaceae    | <i>Primula</i>    | <i>Primula calderiana</i>       | JN046487 |
| Eudicotyledons | Primulaceae    | <i>Primula</i>    | <i>Primula calderiana</i>       | JN046488 |
| Eudicotyledons | Primulaceae    | <i>Primula</i>    | <i>Primula calderiana</i>       | JN046489 |
| Eudicotyledons | Primulaceae    | <i>Primula</i>    | <i>Primula chungensis</i>       | HM018470 |
| Eudicotyledons | Primulaceae    | <i>Primula</i>    | <i>Primula chungensis</i>       | HM018471 |
| Eudicotyledons | Primulaceae    | <i>Primula</i>    | <i>Primula denticulata</i>      | JN046504 |
| Eudicotyledons | Primulaceae    | <i>Primula</i>    | <i>Primula denticulata</i>      | JN046505 |
| Eudicotyledons | Primulaceae    | <i>Primula</i>    | <i>Primula denticulata</i>      | JN046506 |
| Eudicotyledons | Primulaceae    | <i>Primula</i>    | <i>Primula denticulata</i>      | JN046507 |
| Eudicotyledons | Primulaceae    | <i>Primula</i>    | <i>Primula gemmifera</i>        | JN046522 |
| Eudicotyledons | Primulaceae    | <i>Primula</i>    | <i>Primula gemmifera</i>        | JN046523 |
| Eudicotyledons | Primulaceae    | <i>Primula</i>    | <i>Primula gemmifera</i>        | JN046524 |
| Eudicotyledons | Primulaceae    | <i>Primula</i>    | <i>Primula gemmifera</i>        | JN046525 |
| Eudicotyledons | Primulaceae    | <i>Primula</i>    | <i>Primula membranifolia</i>    | JN046536 |
| Eudicotyledons | Primulaceae    | <i>Primula</i>    | <i>Primula membranifolia</i>    | JN046537 |
| Eudicotyledons | Primulaceae    | <i>Primula</i>    | <i>Primula pulchella</i>        | JN046564 |
| Eudicotyledons | Primulaceae    | <i>Primula</i>    | <i>Primula pulchella</i>        | JN046565 |
| Eudicotyledons | Primulaceae    | <i>Primula</i>    | <i>Primula pulchella</i>        | JN046566 |
| Eudicotyledons | Primulaceae    | <i>Primula</i>    | <i>Primula pulchella</i>        | JN046567 |
| Eudicotyledons | Primulaceae    | <i>Primula</i>    | <i>Primula pulchella</i>        | JN046568 |
| Eudicotyledons | Primulaceae    | <i>Primula</i>    | <i>Primula septemloba</i>       | JN046575 |
| Eudicotyledons | Primulaceae    | <i>Primula</i>    | <i>Primula septemloba</i>       | JN046576 |
| Eudicotyledons | Primulaceae    | <i>Primula</i>    | <i>Primula sonchifolia</i>      | JN046585 |
| Eudicotyledons | Primulaceae    | <i>Primula</i>    | <i>Primula sonchifolia</i>      | JN046586 |
| Eudicotyledons | Primulaceae    | <i>Primula</i>    | <i>Primula sonchifolia</i>      | JN046587 |
| Eudicotyledons | Primulaceae    | <i>Primula</i>    | <i>Primula sonchifolia</i>      | JN046588 |
| Eudicotyledons | Primulaceae    | <i>Primula</i>    | <i>Primula sonchifolia</i>      | JN046589 |
| Eudicotyledons | Primulaceae    | <i>Primula</i>    | <i>Primula yunnanensis</i>      | JN046600 |
| Eudicotyledons | Primulaceae    | <i>Primula</i>    | <i>Primula yunnanensis</i>      | JN046601 |
| Eudicotyledons | Hamamelidaceae | <i>Corylopsis</i> | <i>Corylopsis glabrescens</i>   | GU576749 |
| Eudicotyledons | Hamamelidaceae | <i>Corylopsis</i> | <i>Corylopsis glabrescens</i>   | AB237064 |
| Eudicotyledons | Hamamelidaceae | <i>Corylopsis</i> | <i>Corylopsis glabrescens</i>   | AB237069 |
| Eudicotyledons | Hamamelidaceae | <i>Corylopsis</i> | <i>Corylopsis glabrescens</i>   | AB237070 |
| Eudicotyledons | Theaceae       | <i>Stewartia</i>  | <i>Stewartia pteropetiolata</i> | HM100528 |
| Eudicotyledons | Theaceae       | <i>Stewartia</i>  | <i>Stewartia pteropetiolata</i> | HM100529 |
| Eudicotyledons | Theaceae       | <i>Stewartia</i>  | <i>Stewartia villosa</i>        | HM100523 |
| Eudicotyledons | Theaceae       | <i>Stewartia</i>  | <i>Stewartia villosa</i>        | HM100534 |
| Eudicotyledons | Theaceae       | <i>Schima</i>     | <i>Schima argentea</i>          | HM100535 |

|                |               |                    |                                |          |
|----------------|---------------|--------------------|--------------------------------|----------|
| Eudicotyledons | Theaceae      | <i>Schima</i>      | <i>Schima argentea</i>         | HM100536 |
| Eudicotyledons | Theaceae      | <i>Stewartia</i>   | <i>Stewartia malacodendron</i> | HM100556 |
| Eudicotyledons | Theaceae      | <i>Stewartia</i>   | <i>Stewartia malacodendron</i> | HM100557 |
| Eudicotyledons | Theaceae      | <i>Stewartia</i>   | <i>Stewartia malacodendron</i> | HM100558 |
| Eudicotyledons | Theaceae      | <i>Stewartia</i>   | <i>Stewartia malacodendron</i> | HM100559 |
| Eudicotyledons | Theaceae      | <i>Stewartia</i>   | <i>Stewartia monadelphpha</i>  | HM100560 |
| Eudicotyledons | Theaceae      | <i>Stewartia</i>   | <i>Stewartia monadelphpha</i>  | HM100561 |
| Eudicotyledons | Theaceae      | <i>Stewartia</i>   | <i>Stewartia monadelphpha</i>  | HM100562 |
| Eudicotyledons | Theaceae      | <i>Stewartia</i>   | <i>Stewartia monadelphpha</i>  | HM100563 |
| Eudicotyledons | Theaceae      | <i>Stewartia</i>   | <i>Stewartia monadelphpha</i>  | HM100564 |
| Eudicotyledons | Theaceae      | <i>Stewartia</i>   | <i>Stewartia sinensis</i>      | HM100547 |
| Eudicotyledons | Theaceae      | <i>Stewartia</i>   | <i>Stewartia sinensis</i>      | HM100548 |
| Eudicotyledons | Theaceae      | <i>Stewartia</i>   | <i>Stewartia sinensis</i>      | HM100549 |
| Eudicotyledons | Theaceae      | <i>Stewartia</i>   | <i>Stewartia sinensis</i>      | HM100550 |
| Eudicotyledons | Theaceae      | <i>Stewartia</i>   | <i>Stewartia sinensis</i>      | HM100551 |
| Eudicotyledons | Theaceae      | <i>Stewartia</i>   | <i>Stewartia sinensis</i>      | HM100552 |
| Eudicotyledons | Theaceae      | <i>Stewartia</i>   | <i>Stewartia sinensis</i>      | HM100553 |
| Eudicotyledons | Theaceae      | <i>Stewartia</i>   | <i>Stewartia sinensis</i>      | HM100554 |
| Eudicotyledons | Theaceae      | <i>Stewartia</i>   | <i>Stewartia sinensis</i>      | HM100555 |
| Eudicotyledons | Theaceae      | <i>Stewartia</i>   | <i>Stewartia sinensis</i>      | HM100566 |
| Eudicotyledons | Theaceae      | <i>Stewartia</i>   | <i>Stewartia sinensis</i>      | HM100588 |
| Eudicotyledons | Theaceae      | <i>Stewartia</i>   | <i>Stewartia sinensis</i>      | HM100589 |
| Eudicotyledons | Theaceae      | <i>Stewartia</i>   | <i>Stewartia rostrata</i>      | HM100576 |
| Eudicotyledons | Theaceae      | <i>Stewartia</i>   | <i>Stewartia rostrata</i>      | HM100577 |
| Eudicotyledons | Theaceae      | <i>Stewartia</i>   | <i>Stewartia rostrata</i>      | HM100578 |
| Eudicotyledons | Theaceae      | <i>Stewartia</i>   | <i>Stewartia rostrata</i>      | HM100579 |
| Eudicotyledons | Theaceae      | <i>Stewartia</i>   | <i>Stewartia rostrata</i>      | HM100586 |
| Eudicotyledons | Primulaceae   | <i>Primula</i>     | <i>Primula alpicola</i>        | JN046461 |
| Eudicotyledons | Primulaceae   | <i>Primula</i>     | <i>Primula alpicola</i>        | JN046462 |
| Eudicotyledons | Primulaceae   | <i>Primula</i>     | <i>Primula alpicola</i>        | JN046463 |
| Eudicotyledons | Primulaceae   | <i>Primula</i>     | <i>Primula alpicola</i>        | JN046464 |
| Eudicotyledons | Primulaceae   | <i>Primula</i>     | <i>Primula alpicola</i>        | JN046465 |
| Eudicotyledons | Apocynaceae   | <i>Fockea</i>      | <i>Fockea multiflora</i>       | AM231766 |
| Eudicotyledons | Apocynaceae   | <i>Fockea</i>      | <i>Fockea multiflora</i>       | AM231767 |
| Eudicotyledons | Apocynaceae   | <i>Fockea</i>      | <i>Fockea multiflora</i>       | AM231768 |
| Eudicotyledons | Orobanchaceae | <i>Castilleja</i>  | <i>Castilleja sulphurea</i>    | FJ765709 |
| Eudicotyledons | Orobanchaceae | <i>Castilleja</i>  | <i>Castilleja sulphurea</i>    | FJ765710 |
| Eudicotyledons | Orobanchaceae | <i>Castilleja</i>  | <i>Castilleja sulphurea</i>    | FJ765711 |
| Eudicotyledons | Orobanchaceae | <i>Castilleja</i>  | <i>Castilleja sulphurea</i>    | FJ765712 |
| Eudicotyledons | Orobanchaceae | <i>Castilleja</i>  | <i>Castilleja sulphurea</i>    | FJ765713 |
| Eudicotyledons | Orobanchaceae | <i>Castilleja</i>  | <i>Castilleja sulphurea</i>    | FJ765714 |
| Eudicotyledons | Orobanchaceae | <i>Castilleja</i>  | <i>Castilleja sulphurea</i>    | FJ765715 |
| Eudicotyledons | Orobanchaceae | <i>Castilleja</i>  | <i>Castilleja sulphurea</i>    | FJ765716 |
| Eudicotyledons | Orobanchaceae | <i>Castilleja</i>  | <i>Castilleja sulphurea</i>    | FJ765717 |
| Eudicotyledons | Orobanchaceae | <i>Castilleja</i>  | <i>Castilleja sulphurea</i>    | FJ765718 |
| Eudicotyledons | Orobanchaceae | <i>Castilleja</i>  | <i>Castilleja sulphurea</i>    | FJ765719 |
| Eudicotyledons | Orobanchaceae | <i>Castilleja</i>  | <i>Castilleja sulphurea</i>    | FJ765720 |
| Eudicotyledons | Orobanchaceae | <i>Castilleja</i>  | <i>Castilleja sulphurea</i>    | FJ765721 |
| Eudicotyledons | Orobanchaceae | <i>Castilleja</i>  | <i>Castilleja sulphurea</i>    | FJ765722 |
| Eudicotyledons | Orobanchaceae | <i>Castilleja</i>  | <i>Castilleja sulphurea</i>    | FJ765723 |
| Eudicotyledons | Orobanchaceae | <i>Castilleja</i>  | <i>Castilleja sulphurea</i>    | FJ765724 |
| Eudicotyledons | Orobanchaceae | <i>Castilleja</i>  | <i>Castilleja sulphurea</i>    | FJ765725 |
| Eudicotyledons | Fabaceae      | <i>Caesalpinia</i> | <i>Caesalpinia hintonii</i>    | DQ208809 |

|                |              |                     |                                  |          |
|----------------|--------------|---------------------|----------------------------------|----------|
| Eudicotyledons | Fabaceae     | <i>Caesalpinia</i>  | <i>Caesalpinia hintonii</i>      | DQ208810 |
| Eudicotyledons | Fabaceae     | <i>Caesalpinia</i>  | <i>Caesalpinia hintonii</i>      | DQ208811 |
| Eudicotyledons | Fabaceae     | <i>Caesalpinia</i>  | <i>Caesalpinia hintonii</i>      | DQ208812 |
| Eudicotyledons | Fabaceae     | <i>Caesalpinia</i>  | <i>Caesalpinia hintonii</i>      | DQ208813 |
| Eudicotyledons | Fabaceae     | <i>Caesalpinia</i>  | <i>Caesalpinia hintonii</i>      | DQ208814 |
| Eudicotyledons | Fabaceae     | <i>Caesalpinia</i>  | <i>Caesalpinia hintonii</i>      | DQ208815 |
| Eudicotyledons | Fabaceae     | <i>Caesalpinia</i>  | <i>Caesalpinia hintonii</i>      | DQ208816 |
| Eudicotyledons | Fabaceae     | <i>Caesalpinia</i>  | <i>Caesalpinia hintonii</i>      | DQ208817 |
| Eudicotyledons | Fabaceae     | <i>Caesalpinia</i>  | <i>Caesalpinia hintonii</i>      | DQ208818 |
| Eudicotyledons | Fabaceae     | <i>Caesalpinia</i>  | <i>Caesalpinia hintonii</i>      | DQ208819 |
| Eudicotyledons | Fabaceae     | <i>Caesalpinia</i>  | <i>Caesalpinia hintonii</i>      | DQ208820 |
| Eudicotyledons | Fabaceae     | <i>Caesalpinia</i>  | <i>Caesalpinia hintonii</i>      | DQ208821 |
| Eudicotyledons | Fabaceae     | <i>Caesalpinia</i>  | <i>Caesalpinia hintonii</i>      | DQ208822 |
| Eudicotyledons | Fabaceae     | <i>Caesalpinia</i>  | <i>Caesalpinia hintonii</i>      | DQ208823 |
| Eudicotyledons | Fabaceae     | <i>Caesalpinia</i>  | <i>Caesalpinia hintonii</i>      | DQ208824 |
| Eudicotyledons | Fabaceae     | <i>Schizolobium</i> | <i>Schizolobium amazonicum</i>   | FJ668605 |
| Eudicotyledons | Fabaceae     | <i>Schizolobium</i> | <i>Schizolobium amazonicum</i>   | FJ668608 |
| Eudicotyledons | Fabaceae     | <i>Schizolobium</i> | <i>Schizolobium amazonicum</i>   | FJ668609 |
| Eudicotyledons | Elaeagnaceae | <i>Hippophae</i>    | <i>Hippophae tibetana</i>        | JN044914 |
| Eudicotyledons | Elaeagnaceae | <i>Hippophae</i>    | <i>Hippophae tibetana</i>        | JN044915 |
| Eudicotyledons | Elaeagnaceae | <i>Hippophae</i>    | <i>Hippophae tibetana</i>        | JN044916 |
| Eudicotyledons | Elaeagnaceae | <i>Hippophae</i>    | <i>Hippophae tibetana</i>        | JN044917 |
| Eudicotyledons | Elaeagnaceae | <i>Hippophae</i>    | <i>Hippophae tibetana</i>        | JN044918 |
| Eudicotyledons | Theaceae     | <i>Schima</i>       | <i>Schima khasiana</i>           | HM100537 |
| Eudicotyledons | Theaceae     | <i>Schima</i>       | <i>Schima khasiana</i>           | HM100538 |
| Eudicotyledons | Fabaceae     | <i>Mariosousa</i>   | <i>Mariosousa coulteri</i>       | AF525008 |
| Eudicotyledons | Fabaceae     | <i>Mariosousa</i>   | <i>Mariosousa coulteri</i>       | EU811993 |
| Eudicotyledons | Fabaceae     | <i>Mariosousa</i>   | <i>Mariosousa dolichostachya</i> | AF525009 |
| Eudicotyledons | Fabaceae     | <i>Mariosousa</i>   | <i>Mariosousa dolichostachya</i> | EU811992 |
| Eudicotyledons | Lamiaceae    | <i>Vitex</i>        | <i>Vitex trifolia</i>            | JQ319675 |
| Eudicotyledons | Lamiaceae    | <i>Vitex</i>        | <i>Vitex trifolia</i>            | GQ435191 |
| Eudicotyledons | Asteraceae   | <i>Raoulia</i>      | <i>Raoulia eximia</i>            | AY611207 |
| Eudicotyledons | Asteraceae   | <i>Raoulia</i>      | <i>Raoulia eximia</i>            | AY611208 |
| Eudicotyledons | Asteraceae   | <i>Raoulia</i>      | <i>Raoulia eximia</i>            | AY611209 |
| Eudicotyledons | Asteraceae   | <i>Raoulia</i>      | <i>Raoulia eximia</i>            | AY611210 |
| Eudicotyledons | Asteraceae   | <i>Hypochaeris</i>  | <i>Hypochaeris incana</i>        | FM994954 |
| Eudicotyledons | Asteraceae   | <i>Hypochaeris</i>  | <i>Hypochaeris incana</i>        | FM994955 |
| Eudicotyledons | Asteraceae   | <i>Hypochaeris</i>  | <i>Hypochaeris incana</i>        | FM994956 |
| Eudicotyledons | Asteraceae   | <i>Hypochaeris</i>  | <i>Hypochaeris incana</i>        | FM994957 |
| Eudicotyledons | Asteraceae   | <i>Hypochaeris</i>  | <i>Hypochaeris incana</i>        | FM994958 |
| Eudicotyledons | Asteraceae   | <i>Hypochaeris</i>  | <i>Hypochaeris incana</i>        | FM994959 |
| Eudicotyledons | Asteraceae   | <i>Hypochaeris</i>  | <i>Hypochaeris incana</i>        | FM994960 |
| Eudicotyledons | Asteraceae   | <i>Hypochaeris</i>  | <i>Hypochaeris incana</i>        | FM994961 |
| Eudicotyledons | Asteraceae   | <i>Hypochaeris</i>  | <i>Hypochaeris incana</i>        | FM994962 |
| Eudicotyledons | Asteraceae   | <i>Hypochaeris</i>  | <i>Hypochaeris incana</i>        | FM994963 |
| Eudicotyledons | Asteraceae   | <i>Hypochaeris</i>  | <i>Hypochaeris incana</i>        | FM994964 |
| Eudicotyledons | Asteraceae   | <i>Hypochaeris</i>  | <i>Hypochaeris incana</i>        | FM994965 |
| Eudicotyledons | Asteraceae   | <i>Hypochaeris</i>  | <i>Hypochaeris incana</i>        | FM994966 |
| Eudicotyledons | Asteraceae   | <i>Hypochaeris</i>  | <i>Hypochaeris incana</i>        | FM994967 |
| Eudicotyledons | Asteraceae   | <i>Hypochaeris</i>  | <i>Hypochaeris incana</i>        | FM994968 |
| Eudicotyledons | Asteraceae   | <i>Hypochaeris</i>  | <i>Hypochaeris incana</i>        | FM994969 |
| Eudicotyledons | Asteraceae   | <i>Hypochaeris</i>  | <i>Hypochaeris incana</i>        | FM994970 |
| Eudicotyledons | Asteraceae   | <i>Hypochaeris</i>  | <i>Hypochaeris incana</i>        | FM994971 |





|                |             |                    |                               |          |
|----------------|-------------|--------------------|-------------------------------|----------|
| Eudicotyledons | Asteraceae  | <i>Hypochaeris</i> | <i>Hypochaeris incana</i>     | FN394304 |
| Eudicotyledons | Asteraceae  | <i>Hypochaeris</i> | <i>Hypochaeris incana</i>     | FN394305 |
| Eudicotyledons | Asteraceae  | <i>Hypochaeris</i> | <i>Hypochaeris incana</i>     | FN394306 |
| Eudicotyledons | Asteraceae  | <i>Hypochaeris</i> | <i>Hypochaeris incana</i>     | FN394307 |
| Eudicotyledons | Asteraceae  | <i>Hypochaeris</i> | <i>Hypochaeris tenuifolia</i> | FM994947 |
| Eudicotyledons | Asteraceae  | <i>Hypochaeris</i> | <i>Hypochaeris tenuifolia</i> | FM994948 |
| Eudicotyledons | Asteraceae  | <i>Hypochaeris</i> | <i>Hypochaeris tenuifolia</i> | FM994949 |
| Eudicotyledons | Asteraceae  | <i>Hypochaeris</i> | <i>Hypochaeris tenuifolia</i> | FM994950 |
| Eudicotyledons | Asteraceae  | <i>Hypochaeris</i> | <i>Hypochaeris tenuifolia</i> | FM994951 |
| Eudicotyledons | Asteraceae  | <i>Hypochaeris</i> | <i>Hypochaeris tenuifolia</i> | FM994952 |
| Eudicotyledons | Asteraceae  | <i>Hypochaeris</i> | <i>Hypochaeris tenuifolia</i> | FM994953 |
| Eudicotyledons | Primulaceae | <i>Lysimachia</i>  | <i>Lysimachia christinae</i>  | GQ434938 |
| Eudicotyledons | Primulaceae | <i>Lysimachia</i>  | <i>Lysimachia christinae</i>  | JN045301 |
| Eudicotyledons | Primulaceae | <i>Lysimachia</i>  | <i>Lysimachia christinae</i>  | JN045302 |
| Eudicotyledons | Primulaceae | <i>Lysimachia</i>  | <i>Lysimachia christinae</i>  | JN045303 |
| Eudicotyledons | Primulaceae | <i>Lysimachia</i>  | <i>Lysimachia christinae</i>  | JN045304 |
| Eudicotyledons | Primulaceae | <i>Lysimachia</i>  | <i>Lysimachia christinae</i>  | JN045305 |
| Eudicotyledons | Primulaceae | <i>Lysimachia</i>  | <i>Lysimachia ciliata</i>     | HQ596760 |
| Eudicotyledons | Primulaceae | <i>Lysimachia</i>  | <i>Lysimachia ciliata</i>     | DQ006219 |
| Eudicotyledons | Primulaceae | <i>Lysimachia</i>  | <i>Lysimachia crispidens</i>  | JN045316 |
| Eudicotyledons | Primulaceae | <i>Lysimachia</i>  | <i>Lysimachia crispidens</i>  | JN045317 |
| Eudicotyledons | Primulaceae | <i>Lysimachia</i>  | <i>Lysimachia decurrens</i>   | GQ257964 |
| Eudicotyledons | Primulaceae | <i>Lysimachia</i>  | <i>Lysimachia decurrens</i>   | JN045318 |
| Eudicotyledons | Primulaceae | <i>Lysimachia</i>  | <i>Lysimachia decurrens</i>   | JN045319 |
| Eudicotyledons | Primulaceae | <i>Lysimachia</i>  | <i>Lysimachia fistulosa</i>   | JN045327 |
| Eudicotyledons | Primulaceae | <i>Lysimachia</i>  | <i>Lysimachia fistulosa</i>   | JN045328 |
| Eudicotyledons | Primulaceae | <i>Lysimachia</i>  | <i>Lysimachia fistulosa</i>   | JN045329 |
| Eudicotyledons | Primulaceae | <i>Lysimachia</i>  | <i>Lysimachia fistulosa</i>   | JN045330 |
| Eudicotyledons | Primulaceae | <i>Lysimachia</i>  | <i>Lysimachia fordiana</i>    | JN045331 |
| Eudicotyledons | Primulaceae | <i>Lysimachia</i>  | <i>Lysimachia fordiana</i>    | JN045332 |
| Eudicotyledons | Primulaceae | <i>Lysimachia</i>  | <i>Lysimachia fortunei</i>    | JN045333 |
| Eudicotyledons | Primulaceae | <i>Lysimachia</i>  | <i>Lysimachia fortunei</i>    | JN045334 |
| Eudicotyledons | Primulaceae | <i>Lysimachia</i>  | <i>Lysimachia fortunei</i>    | JN045335 |
| Eudicotyledons | Primulaceae | <i>Lysimachia</i>  | <i>Lysimachia fortunei</i>    | JN045336 |
| Eudicotyledons | Primulaceae | <i>Lysimachia</i>  | <i>Lysimachia fortunei</i>    | JN045337 |
| Eudicotyledons | Primulaceae | <i>Lysimachia</i>  | <i>Lysimachia glutinosa</i>   | GQ257967 |
| Eudicotyledons | Primulaceae | <i>Lysimachia</i>  | <i>Lysimachia glutinosa</i>   | GQ257968 |
| Eudicotyledons | Primulaceae | <i>Lysimachia</i>  | <i>Lysimachia grammica</i>    | JN045340 |
| Eudicotyledons | Primulaceae | <i>Lysimachia</i>  | <i>Lysimachia grammica</i>    | JN045341 |
| Eudicotyledons | Primulaceae | <i>Lysimachia</i>  | <i>Lysimachia heterogenea</i> | JN045353 |
| Eudicotyledons | Primulaceae | <i>Lysimachia</i>  | <i>Lysimachia heterogenea</i> | JN045354 |
| Eudicotyledons | Primulaceae | <i>Lysimachia</i>  | <i>Lysimachia heterogenea</i> | JN045355 |
| Eudicotyledons | Primulaceae | <i>Lysimachia</i>  | <i>Lysimachia iniki</i>       | GQ257970 |
| Eudicotyledons | Primulaceae | <i>Lysimachia</i>  | <i>Lysimachia iniki</i>       | GQ257971 |
| Eudicotyledons | Primulaceae | <i>Lysimachia</i>  | <i>Lysimachia insignis</i>    | JN045356 |
| Eudicotyledons | Primulaceae | <i>Lysimachia</i>  | <i>Lysimachia insignis</i>    | JN045357 |
| Eudicotyledons | Primulaceae | <i>Lysimachia</i>  | <i>Lysimachia insignis</i>    | JN045358 |
| Eudicotyledons | Primulaceae | <i>Lysimachia</i>  | <i>Lysimachia insignis</i>    | JN045359 |
| Eudicotyledons | Primulaceae | <i>Lysimachia</i>  | <i>Lysimachia insignis</i>    | JN045360 |
| Eudicotyledons | Primulaceae | <i>Lysimachia</i>  | <i>Lysimachia insignis</i>    | JN045361 |
| Eudicotyledons | Primulaceae | <i>Lysimachia</i>  | <i>Lysimachia laxa</i>        | JN045364 |
| Eudicotyledons | Primulaceae | <i>Lysimachia</i>  | <i>Lysimachia laxa</i>        | JN045365 |
| Eudicotyledons | Primulaceae | <i>Lysimachia</i>  | <i>Lysimachia lobelioides</i> | GQ257975 |

|                |               |                    |                                  |          |
|----------------|---------------|--------------------|----------------------------------|----------|
| Eudicotyledons | Primulaceae   | <i>Lysimachia</i>  | <i>Lysimachia lobelioides</i>    | JN045366 |
| Eudicotyledons | Primulaceae   | <i>Lysimachia</i>  | <i>Lysimachia lobelioides</i>    | JN045367 |
| Eudicotyledons | Primulaceae   | <i>Lysimachia</i>  | <i>Lysimachia longipes</i>       | JN045368 |
| Eudicotyledons | Primulaceae   | <i>Lysimachia</i>  | <i>Lysimachia longipes</i>       | JN045369 |
| Eudicotyledons | Primulaceae   | <i>Lysimachia</i>  | <i>Lysimachia longipes</i>       | JN045370 |
| Eudicotyledons | Primulaceae   | <i>Lysimachia</i>  | <i>Lysimachia melampyroides</i>  | JN045371 |
| Eudicotyledons | Primulaceae   | <i>Lysimachia</i>  | <i>Lysimachia melampyroides</i>  | JN045372 |
| Eudicotyledons | Primulaceae   | <i>Lysimachia</i>  | <i>Lysimachia omeiensis</i>      | JN045373 |
| Eudicotyledons | Primulaceae   | <i>Lysimachia</i>  | <i>Lysimachia omeiensis</i>      | JN045374 |
| Eudicotyledons | Primulaceae   | <i>Lysimachia</i>  | <i>Lysimachia paridiformis</i>   | JN045375 |
| Eudicotyledons | Primulaceae   | <i>Lysimachia</i>  | <i>Lysimachia paridiformis</i>   | JN045376 |
| Eudicotyledons | Primulaceae   | <i>Lysimachia</i>  | <i>Lysimachia paridiformis</i>   | JN045377 |
| Eudicotyledons | Primulaceae   | <i>Lysimachia</i>  | <i>Lysimachia paridiformis</i>   | JN045378 |
| Eudicotyledons | Primulaceae   | <i>Lysimachia</i>  | <i>Lysimachia paridiformis</i>   | JN045379 |
| Eudicotyledons | Primulaceae   | <i>Lysimachia</i>  | <i>Lysimachia phyllocephala</i>  | JN045386 |
| Eudicotyledons | Primulaceae   | <i>Lysimachia</i>  | <i>Lysimachia phyllocephala</i>  | JN045387 |
| Eudicotyledons | Primulaceae   | <i>Lysimachia</i>  | <i>Lysimachia pittosporoides</i> | JN045388 |
| Eudicotyledons | Primulaceae   | <i>Lysimachia</i>  | <i>Lysimachia pittosporoides</i> | JN045389 |
| Eudicotyledons | Primulaceae   | <i>Lysimachia</i>  | <i>Lysimachia rubiginosa</i>     | JN045390 |
| Eudicotyledons | Primulaceae   | <i>Lysimachia</i>  | <i>Lysimachia rubiginosa</i>     | JN045391 |
| Eudicotyledons | Primulaceae   | <i>Lysimachia</i>  | <i>Lysimachia rubiginosa</i>     | JN045392 |
| Eudicotyledons | Primulaceae   | <i>Lysimachia</i>  | <i>Lysimachia candida</i>        | JN045293 |
| Eudicotyledons | Primulaceae   | <i>Lysimachia</i>  | <i>Lysimachia candida</i>        | JN045294 |
| Eudicotyledons | Asteraceae    | <i>Hypochaeris</i> | <i>Hypochaeris hookeri</i>       | FM994941 |
| Eudicotyledons | Asteraceae    | <i>Hypochaeris</i> | <i>Hypochaeris hookeri</i>       | FM994942 |
| Eudicotyledons | Asteraceae    | <i>Hypochaeris</i> | <i>Hypochaeris hookeri</i>       | FM994943 |
| Eudicotyledons | Asteraceae    | <i>Hypochaeris</i> | <i>Hypochaeris hookeri</i>       | FM994944 |
| Eudicotyledons | Asteraceae    | <i>Hypochaeris</i> | <i>Hypochaeris hookeri</i>       | FM994945 |
| Eudicotyledons | Asteraceae    | <i>Hypochaeris</i> | <i>Hypochaeris hookeri</i>       | FM994946 |
| Eudicotyledons | Ranunculaceae | <i>Aconitum</i>    | <i>Aconitum scaposum</i>         | GQ337739 |
| Eudicotyledons | Ranunculaceae | <i>Aconitum</i>    | <i>Aconitum scaposum</i>         | GQ337740 |
| Eudicotyledons | Ranunculaceae | <i>Aconitum</i>    | <i>Aconitum scaposum</i>         | GQ337741 |
| Eudicotyledons | Ranunculaceae | <i>Aconitum</i>    | <i>Aconitum scaposum</i>         | JN043766 |
| Eudicotyledons | Ranunculaceae | <i>Aconitum</i>    | <i>Aconitum scaposum</i>         | JN043767 |
| Eudicotyledons | Ranunculaceae | <i>Aconitum</i>    | <i>Aconitum scaposum</i>         | JN043768 |
| Eudicotyledons | Ranunculaceae | <i>Aconitum</i>    | <i>Aconitum scaposum</i>         | JN043769 |
| Eudicotyledons | Ranunculaceae | <i>Aconitum</i>    | <i>Aconitum sinomontanum</i>     | JN043772 |
| Eudicotyledons | Ranunculaceae | <i>Aconitum</i>    | <i>Aconitum sinomontanum</i>     | JN043773 |
| Eudicotyledons | Ranunculaceae | <i>Aconitum</i>    | <i>Aconitum sinomontanum</i>     | JN043774 |
| Eudicotyledons | Ranunculaceae | <i>Aconitum</i>    | <i>Aconitum sinomontanum</i>     | JN043775 |
| Eudicotyledons | Ranunculaceae | <i>Aconitum</i>    | <i>Aconitum hemsleyanum</i>      | GQ337729 |
| Eudicotyledons | Ranunculaceae | <i>Aconitum</i>    | <i>Aconitum hemsleyanum</i>      | GQ337730 |
| Eudicotyledons | Ranunculaceae | <i>Aconitum</i>    | <i>Aconitum hemsleyanum</i>      | GQ337731 |
| Eudicotyledons | Ranunculaceae | <i>Aconitum</i>    | <i>Aconitum hemsleyanum</i>      | GQ337732 |
| Eudicotyledons | Ranunculaceae | <i>Aconitum</i>    | <i>Aconitum hemsleyanum</i>      | GQ337733 |
| Eudicotyledons | Ranunculaceae | <i>Aconitum</i>    | <i>Aconitum hemsleyanum</i>      | GQ337809 |
| Eudicotyledons | Ranunculaceae | <i>Aconitum</i>    | <i>Aconitum hemsleyanum</i>      | GQ337843 |
| Eudicotyledons | Ranunculaceae | <i>Aconitum</i>    | <i>Aconitum gymnandrum</i>       | FJ418149 |
| Eudicotyledons | Ranunculaceae | <i>Aconitum</i>    | <i>Aconitum gymnandrum</i>       | FJ418150 |
| Eudicotyledons | Ranunculaceae | <i>Aconitum</i>    | <i>Aconitum gymnandrum</i>       | FJ418151 |
| Eudicotyledons | Ranunculaceae | <i>Aconitum</i>    | <i>Aconitum gymnandrum</i>       | GQ337734 |
| Eudicotyledons | Ranunculaceae | <i>Aconitum</i>    | <i>Aconitum gymnandrum</i>       | GQ337735 |
| Eudicotyledons | Ranunculaceae | <i>Aconitum</i>    | <i>Aconitum gymnandrum</i>       | GQ337736 |

|                |               |                     |                                  |          |
|----------------|---------------|---------------------|----------------------------------|----------|
| Eudicotyledons | Ranunculaceae | <i>Delphinium</i>   | <i>Delphinium forrestii</i>      | JN044406 |
| Eudicotyledons | Ranunculaceae | <i>Delphinium</i>   | <i>Delphinium forrestii</i>      | JN044407 |
| Eudicotyledons | Amaranthaceae | <i>Suaeda</i>       | <i>Suaeda acuminata</i>          | JN047261 |
| Eudicotyledons | Amaranthaceae | <i>Suaeda</i>       | <i>Suaeda acuminata</i>          | JN047262 |
| Eudicotyledons | Amaranthaceae | <i>Suaeda</i>       | <i>Suaeda acuminata</i>          | JN047263 |
| Eudicotyledons | Amaranthaceae | <i>Suaeda</i>       | <i>Suaeda corniculata</i>        | JN047264 |
| Eudicotyledons | Amaranthaceae | <i>Suaeda</i>       | <i>Suaeda corniculata</i>        | JN047265 |
| Eudicotyledons | Fabaceae      | <i>Chamaecrista</i> | <i>Chamaecrista nictitans</i>    | GQ248262 |
| Eudicotyledons | Fabaceae      | <i>Chamaecrista</i> | <i>Chamaecrista nictitans</i>    | EF590678 |
| Eudicotyledons | Ranunculaceae | <i>Aconitum</i>     | <i>Aconitum vilmorinianum</i>    | GQ337751 |
| Eudicotyledons | Ranunculaceae | <i>Aconitum</i>     | <i>Aconitum vilmorinianum</i>    | GQ337752 |
| Eudicotyledons | Ranunculaceae | <i>Aconitum</i>     | <i>Aconitum vilmorinianum</i>    | GQ337756 |
| Eudicotyledons | Ranunculaceae | <i>Aconitum</i>     | <i>Aconitum vilmorinianum</i>    | GQ337757 |
| Eudicotyledons | Ranunculaceae | <i>Aconitum</i>     | <i>Aconitum vilmorinianum</i>    | GQ337758 |
| Eudicotyledons | Ranunculaceae | <i>Aconitum</i>     | <i>Aconitum vilmorinianum</i>    | GQ337759 |
| Eudicotyledons | Ranunculaceae | <i>Aconitum</i>     | <i>Aconitum vilmorinianum</i>    | GQ337760 |
| Eudicotyledons | Ranunculaceae | <i>Aconitum</i>     | <i>Aconitum vilmorinianum</i>    | GQ337761 |
| Eudicotyledons | Ranunculaceae | <i>Aconitum</i>     | <i>Aconitum vilmorinianum</i>    | GQ337762 |
| Eudicotyledons | Ranunculaceae | <i>Aconitum</i>     | <i>Aconitum vilmorinianum</i>    | GQ337763 |
| Eudicotyledons | Ranunculaceae | <i>Aconitum</i>     | <i>Aconitum vilmorinianum</i>    | GQ337764 |
| Eudicotyledons | Ranunculaceae | <i>Aconitum</i>     | <i>Aconitum vilmorinianum</i>    | GQ337844 |
| Eudicotyledons | Ranunculaceae | <i>Aconitum</i>     | <i>Aconitum vilmorinianum</i>    | GQ337845 |
| Eudicotyledons | Ranunculaceae | <i>Aconitum</i>     | <i>Aconitum vilmorinianum</i>    | GQ337846 |
| Eudicotyledons | Ranunculaceae | <i>Aconitum</i>     | <i>Aconitum vilmorinianum</i>    | GQ337847 |
| Eudicotyledons | Ranunculaceae | <i>Aconitum</i>     | <i>Aconitum contortum</i>        | GQ337791 |
| Eudicotyledons | Ranunculaceae | <i>Aconitum</i>     | <i>Aconitum contortum</i>        | GQ337792 |
| Eudicotyledons | Ranunculaceae | <i>Aconitum</i>     | <i>Aconitum contortum</i>        | GQ337793 |
| Eudicotyledons | Ranunculaceae | <i>Aconitum</i>     | <i>Aconitum contortum</i>        | GQ337794 |
| Eudicotyledons | Ranunculaceae | <i>Aconitum</i>     | <i>Aconitum brachypodum</i>      | GQ337726 |
| Eudicotyledons | Ranunculaceae | <i>Aconitum</i>     | <i>Aconitum brachypodum</i>      | GQ337727 |
| Eudicotyledons | Ranunculaceae | <i>Aconitum</i>     | <i>Aconitum brachypodum</i>      | GQ337728 |
| Eudicotyledons | Apocynaceae   | <i>Vincetoxicum</i> | <i>Vincetoxicum macrophyllum</i> | AB109154 |
| Eudicotyledons | Apocynaceae   | <i>Vincetoxicum</i> | <i>Vincetoxicum macrophyllum</i> | AB109155 |
| Eudicotyledons | Apocynaceae   | <i>Vincetoxicum</i> | <i>Vincetoxicum nipponicum</i>   | AB109157 |
| Eudicotyledons | Apocynaceae   | <i>Vincetoxicum</i> | <i>Vincetoxicum nipponicum</i>   | AB109158 |
| Eudicotyledons | Lamiaceae     | <i>Thymus</i>       | <i>Thymus quinquecostatus</i>    | AY281310 |
| Eudicotyledons | Lamiaceae     | <i>Thymus</i>       | <i>Thymus quinquecostatus</i>    | AY281311 |
| Eudicotyledons | Lamiaceae     | <i>Thymus</i>       | <i>Thymus quinquecostatus</i>    | AY281312 |
| Eudicotyledons | Lamiaceae     | <i>Thymus</i>       | <i>Thymus quinquecostatus</i>    | AY281313 |
| Eudicotyledons | Lamiaceae     | <i>Thymus</i>       | <i>Thymus quinquecostatus</i>    | AY281314 |
| Eudicotyledons | Lamiaceae     | <i>Thymus</i>       | <i>Thymus quinquecostatus</i>    | AY281315 |
| Eudicotyledons | Lamiaceae     | <i>Thymus</i>       | <i>Thymus quinquecostatus</i>    | AY443427 |
| Eudicotyledons | Lamiaceae     | <i>Thymus</i>       | <i>Thymus quinquecostatus</i>    | AY443428 |
| Eudicotyledons | Lamiaceae     | <i>Thymus</i>       | <i>Thymus quinquecostatus</i>    | AY443429 |
| Eudicotyledons | Lamiaceae     | <i>Thymus</i>       | <i>Thymus quinquecostatus</i>    | AY443430 |
| Eudicotyledons | Lamiaceae     | <i>Thymus</i>       | <i>Thymus quinquecostatus</i>    | AY443431 |
| Eudicotyledons | Lamiaceae     | <i>Thymus</i>       | <i>Thymus quinquecostatus</i>    | HM590114 |
| Eudicotyledons | Lamiaceae     | <i>Thymus</i>       | <i>Thymus magnus</i>             | AY281316 |
| Eudicotyledons | Lamiaceae     | <i>Thymus</i>       | <i>Thymus magnus</i>             | AY281317 |
| Eudicotyledons | Lamiaceae     | <i>Thymus</i>       | <i>Thymus magnus</i>             | AY443432 |
| Eudicotyledons | Lamiaceae     | <i>Thymus</i>       | <i>Thymus magnus</i>             | AY443433 |
| Eudicotyledons | Araliaceae    | <i>Dendropanax</i>  | <i>Dendropanax burmanicus</i>    | GU054806 |
| Eudicotyledons | Araliaceae    | <i>Dendropanax</i>  | <i>Dendropanax burmanicus</i>    | GU054876 |

|                |               |                    |                                  |          |
|----------------|---------------|--------------------|----------------------------------|----------|
| Eudicotyledons | Ranunculaceae | <i>Aconitum</i>    | <i>Aconitum kusnezoffii</i>      | GQ337723 |
| Eudicotyledons | Ranunculaceae | <i>Aconitum</i>    | <i>Aconitum kusnezoffii</i>      | GQ337724 |
| Eudicotyledons | Ranunculaceae | <i>Aconitum</i>    | <i>Aconitum kusnezoffii</i>      | GQ337725 |
| Eudicotyledons | Ranunculaceae | <i>Aconitum</i>    | <i>Aconitum kusnezoffii</i>      | GQ337789 |
| Eudicotyledons | Ranunculaceae | <i>Aconitum</i>    | <i>Aconitum kusnezoffii</i>      | GQ337790 |
| Eudicotyledons | Ranunculaceae | <i>Aconitum</i>    | <i>Aconitum kusnezoffii</i>      | GQ337798 |
| Eudicotyledons | Ranunculaceae | <i>Aconitum</i>    | <i>Aconitum kusnezoffii</i>      | GQ337799 |
| Eudicotyledons | Ranunculaceae | <i>Aconitum</i>    | <i>Aconitum kusnezoffii</i>      | GQ337812 |
| Eudicotyledons | Ranunculaceae | <i>Aconitum</i>    | <i>Aconitum kusnezoffii</i>      | GQ337813 |
| Eudicotyledons | Ranunculaceae | <i>Aconitum</i>    | <i>Aconitum kusnezoffii</i>      | GQ337814 |
| Eudicotyledons | Ranunculaceae | <i>Aconitum</i>    | <i>Aconitum kusnezoffii</i>      | GQ337836 |
| Eudicotyledons | Ranunculaceae | <i>Aconitum</i>    | <i>Aconitum kusnezoffii</i>      | GQ337837 |
| Eudicotyledons | Ranunculaceae | <i>Aconitum</i>    | <i>Aconitum kusnezoffii</i>      | GQ337838 |
| Eudicotyledons | Ranunculaceae | <i>Aconitum</i>    | <i>Aconitum kusnezoffii</i>      | GQ337839 |
| Eudicotyledons | Ranunculaceae | <i>Aconitum</i>    | <i>Aconitum kusnezoffii</i>      | GQ337848 |
| Eudicotyledons | Ranunculaceae | <i>Aconitum</i>    | <i>Aconitum kusnezoffii</i>      | GQ337849 |
| Eudicotyledons | Ranunculaceae | <i>Aconitum</i>    | <i>Aconitum kusnezoffii</i>      | FJ821181 |
| Eudicotyledons | Ranunculaceae | <i>Aconitum</i>    | <i>Aconitum kusnezoffii</i>      | FJ821182 |
| Eudicotyledons | Ranunculaceae | <i>Aconitum</i>    | <i>Aconitum kusnezoffii</i>      | FJ821183 |
| Eudicotyledons | Symplocaceae  | <i>Symplocos</i>   | <i>Symplocos cochinchinensis</i> | HQ415519 |
| Eudicotyledons | Symplocaceae  | <i>Symplocos</i>   | <i>Symplocos cochinchinensis</i> | AB115382 |
| Eudicotyledons | Symplocaceae  | <i>Symplocos</i>   | <i>Symplocos lancifolia</i>      | HQ415516 |
| Eudicotyledons | Symplocaceae  | <i>Symplocos</i>   | <i>Symplocos lancifolia</i>      | AB115386 |
| Eudicotyledons | Symplocaceae  | <i>Symplocos</i>   | <i>Symplocos stellaris</i>       | HQ427079 |
| Eudicotyledons | Symplocaceae  | <i>Symplocos</i>   | <i>Symplocos stellaris</i>       | AB115389 |
| Eudicotyledons | Araliaceae    | <i>Dendropanax</i> | <i>Dendropanax chevalieri</i>    | GU054858 |
| Eudicotyledons | Araliaceae    | <i>Dendropanax</i> | <i>Dendropanax chevalieri</i>    | GU054878 |
| Eudicotyledons | Symplocaceae  | <i>Symplocos</i>   | <i>Symplocos laurina</i>         | EU769757 |
| Eudicotyledons | Symplocaceae  | <i>Symplocos</i>   | <i>Symplocos laurina</i>         | EU769758 |
| Eudicotyledons | Symplocaceae  | <i>Symplocos</i>   | <i>Symplocos laurina</i>         | EU769759 |
| Eudicotyledons | Symplocaceae  | <i>Symplocos</i>   | <i>Symplocos laurina</i>         | EU769760 |
| Eudicotyledons | Symplocaceae  | <i>Symplocos</i>   | <i>Symplocos laurina</i>         | EU769761 |
| Eudicotyledons | Symplocaceae  | <i>Symplocos</i>   | <i>Symplocos laurina</i>         | EU769762 |
| Eudicotyledons | Symplocaceae  | <i>Symplocos</i>   | <i>Symplocos laurina</i>         | EU769763 |
| Eudicotyledons | Symplocaceae  | <i>Symplocos</i>   | <i>Symplocos laurina</i>         | EU769764 |
| Eudicotyledons | Symplocaceae  | <i>Symplocos</i>   | <i>Symplocos laurina</i>         | EU769765 |
| Eudicotyledons | Symplocaceae  | <i>Symplocos</i>   | <i>Symplocos laurina</i>         | EU769766 |
| Eudicotyledons | Symplocaceae  | <i>Symplocos</i>   | <i>Symplocos laurina</i>         | EU769767 |
| Eudicotyledons | Symplocaceae  | <i>Symplocos</i>   | <i>Symplocos laurina</i>         | EU769768 |
| Eudicotyledons | Symplocaceae  | <i>Symplocos</i>   | <i>Symplocos laurina</i>         | EU769769 |
| Eudicotyledons | Symplocaceae  | <i>Symplocos</i>   | <i>Symplocos laurina</i>         | EU769770 |
| Eudicotyledons | Symplocaceae  | <i>Symplocos</i>   | <i>Symplocos laurina</i>         | EU769771 |
| Eudicotyledons | Symplocaceae  | <i>Symplocos</i>   | <i>Symplocos laurina</i>         | EU769772 |
| Eudicotyledons | Symplocaceae  | <i>Symplocos</i>   | <i>Symplocos laurina</i>         | EU769773 |
| Eudicotyledons | Symplocaceae  | <i>Symplocos</i>   | <i>Symplocos laurina</i>         | EU769774 |
| Eudicotyledons | Symplocaceae  | <i>Symplocos</i>   | <i>Symplocos laurina</i>         | EU769775 |
| Eudicotyledons | Symplocaceae  | <i>Symplocos</i>   | <i>Symplocos laurina</i>         | EU769776 |
| Eudicotyledons | Symplocaceae  | <i>Symplocos</i>   | <i>Symplocos laurina</i>         | EU769777 |
| Eudicotyledons | Symplocaceae  | <i>Symplocos</i>   | <i>Symplocos laurina</i>         | EU769778 |
| Eudicotyledons | Symplocaceae  | <i>Symplocos</i>   | <i>Symplocos laurina</i>         | EU769779 |
| Eudicotyledons | Symplocaceae  | <i>Symplocos</i>   | <i>Symplocos laurina</i>         | EU769780 |
| Eudicotyledons | Symplocaceae  | <i>Symplocos</i>   | <i>Symplocos laurina</i>         | EU769781 |
| Eudicotyledons | Symplocaceae  | <i>Symplocos</i>   | <i>Symplocos laurina</i>         | EU769782 |









|                |                |                    |                              |          |
|----------------|----------------|--------------------|------------------------------|----------|
| Eudicotyledons | Symplocaceae   | <i>Symplocos</i>   | <i>Symplocos laurina</i>     | EU769942 |
| Eudicotyledons | Symplocaceae   | <i>Symplocos</i>   | <i>Symplocos laurina</i>     | EU769943 |
| Eudicotyledons | Symplocaceae   | <i>Symplocos</i>   | <i>Symplocos laurina</i>     | EU769944 |
| Eudicotyledons | Symplocaceae   | <i>Symplocos</i>   | <i>Symplocos laurina</i>     | EU769945 |
| Eudicotyledons | Symplocaceae   | <i>Symplocos</i>   | <i>Symplocos laurina</i>     | EU769946 |
| Eudicotyledons | Symplocaceae   | <i>Symplocos</i>   | <i>Symplocos laurina</i>     | EU769947 |
| Eudicotyledons | Symplocaceae   | <i>Symplocos</i>   | <i>Symplocos laurina</i>     | EU769948 |
| Eudicotyledons | Symplocaceae   | <i>Symplocos</i>   | <i>Symplocos laurina</i>     | EU769949 |
| Eudicotyledons | Symplocaceae   | <i>Symplocos</i>   | <i>Symplocos laurina</i>     | EU769950 |
| Eudicotyledons | Symplocaceae   | <i>Symplocos</i>   | <i>Symplocos laurina</i>     | EU769951 |
| Eudicotyledons | Symplocaceae   | <i>Symplocos</i>   | <i>Symplocos laurina</i>     | EU769952 |
| Eudicotyledons | Polygonaceae   | <i>Polygonum</i>   | <i>Polygonum amphibium</i>   | EF653750 |
| Eudicotyledons | Polygonaceae   | <i>Polygonum</i>   | <i>Polygonum amphibium</i>   | EF653751 |
| Eudicotyledons | Asteraceae     | <i>Sonchus</i>     | <i>Sonchus hydrophilus</i>   | AY457991 |
| Eudicotyledons | Asteraceae     | <i>Sonchus</i>     | <i>Sonchus hydrophilus</i>   | AY457992 |
| Eudicotyledons | Asteraceae     | <i>Sonchus</i>     | <i>Sonchus hydrophilus</i>   | AY457993 |
| Eudicotyledons | Asteraceae     | <i>Sonchus</i>     | <i>Sonchus hydrophilus</i>   | AY457994 |
| Eudicotyledons | Asteraceae     | <i>Sonchus</i>     | <i>Sonchus hydrophilus</i>   | AY457995 |
| Eudicotyledons | Phyllanthaceae | <i>Phyllanthus</i> | <i>Phyllanthus acidus</i>    | GU598541 |
| Eudicotyledons | Phyllanthaceae | <i>Phyllanthus</i> | <i>Phyllanthus acidus</i>    | GU598542 |
| Eudicotyledons | Phyllanthaceae | <i>Phyllanthus</i> | <i>Phyllanthus acidus</i>    | GU598543 |
| Eudicotyledons | Primulaceae    | <i>Primula</i>     | <i>Primula amethystina</i>   | JN046466 |
| Eudicotyledons | Primulaceae    | <i>Primula</i>     | <i>Primula amethystina</i>   | JN046467 |
| Eudicotyledons | Primulaceae    | <i>Primula</i>     | <i>Primula amethystina</i>   | JN046468 |
| Eudicotyledons | Primulaceae    | <i>Primula</i>     | <i>Primula faberi</i>        | JN046517 |
| Eudicotyledons | Primulaceae    | <i>Primula</i>     | <i>Primula faberi</i>        | JN046518 |
| Eudicotyledons | Asteraceae     | <i>Raoulia</i>     | <i>Raoulia grandiflora</i>   | AY611231 |
| Eudicotyledons | Asteraceae     | <i>Raoulia</i>     | <i>Raoulia grandiflora</i>   | AY611232 |
| Eudicotyledons | Orobanchaceae  | <i>Agalinis</i>    | <i>Agalinis acuta</i>        | GU943532 |
| Eudicotyledons | Orobanchaceae  | <i>Agalinis</i>    | <i>Agalinis acuta</i>        | EU827882 |
| Eudicotyledons | Orobanchaceae  | <i>Agalinis</i>    | <i>Agalinis acuta</i>        | EU827883 |
| Eudicotyledons | Orobanchaceae  | <i>Agalinis</i>    | <i>Agalinis acuta</i>        | EU827884 |
| Eudicotyledons | Orobanchaceae  | <i>Agalinis</i>    | <i>Agalinis acuta</i>        | EU827885 |
| Eudicotyledons | Orobanchaceae  | <i>Agalinis</i>    | <i>Agalinis acuta</i>        | EU827886 |
| Eudicotyledons | Orobanchaceae  | <i>Agalinis</i>    | <i>Agalinis acuta</i>        | EU827887 |
| Eudicotyledons | Orobanchaceae  | <i>Agalinis</i>    | <i>Agalinis acuta</i>        | EU827888 |
| Eudicotyledons | Orobanchaceae  | <i>Agalinis</i>    | <i>Agalinis acuta</i>        | EU827889 |
| Eudicotyledons | Orobanchaceae  | <i>Agalinis</i>    | <i>Agalinis acuta</i>        | EU827890 |
| Eudicotyledons | Orobanchaceae  | <i>Agalinis</i>    | <i>Agalinis aphylla</i>      | EU827891 |
| Eudicotyledons | Orobanchaceae  | <i>Agalinis</i>    | <i>Agalinis aphylla</i>      | EU827892 |
| Eudicotyledons | Orobanchaceae  | <i>Agalinis</i>    | <i>Agalinis divaricata</i>   | EU827901 |
| Eudicotyledons | Orobanchaceae  | <i>Agalinis</i>    | <i>Agalinis divaricata</i>   | EU827902 |
| Eudicotyledons | Orobanchaceae  | <i>Agalinis</i>    | <i>Agalinis fasciculata</i>  | EU827904 |
| Eudicotyledons | Orobanchaceae  | <i>Agalinis</i>    | <i>Agalinis fasciculata</i>  | EU827905 |
| Eudicotyledons | Orobanchaceae  | <i>Agalinis</i>    | <i>Agalinis fasciculata</i>  | EU827906 |
| Eudicotyledons | Orobanchaceae  | <i>Agalinis</i>    | <i>Agalinis filicaulis</i>   | EU827907 |
| Eudicotyledons | Orobanchaceae  | <i>Agalinis</i>    | <i>Agalinis filicaulis</i>   | EU827908 |
| Eudicotyledons | Orobanchaceae  | <i>Agalinis</i>    | <i>Agalinis heterophylla</i> | EU827896 |
| Eudicotyledons | Orobanchaceae  | <i>Agalinis</i>    | <i>Agalinis heterophylla</i> | EU827914 |
| Eudicotyledons | Orobanchaceae  | <i>Agalinis</i>    | <i>Agalinis heterophylla</i> | EU827915 |
| Eudicotyledons | Orobanchaceae  | <i>Agalinis</i>    | <i>Agalinis linifolia</i>    | EU827920 |
| Eudicotyledons | Orobanchaceae  | <i>Agalinis</i>    | <i>Agalinis linifolia</i>    | EU827921 |
| Eudicotyledons | Orobanchaceae  | <i>Agalinis</i>    | <i>Agalinis obtusifolia</i>  | GU943536 |

|                |                |                    |                                |          |
|----------------|----------------|--------------------|--------------------------------|----------|
| Eudicotyledons | Orobanchaceae  | <i>Agalinis</i>    | <i>Agalinis obtusifolia</i>    | GU943537 |
| Eudicotyledons | Orobanchaceae  | <i>Agalinis</i>    | <i>Agalinis obtusifolia</i>    | GU943538 |
| Eudicotyledons | Orobanchaceae  | <i>Agalinis</i>    | <i>Agalinis obtusifolia</i>    | GU943539 |
| Eudicotyledons | Orobanchaceae  | <i>Agalinis</i>    | <i>Agalinis obtusifolia</i>    | EU827925 |
| Eudicotyledons | Orobanchaceae  | <i>Agalinis</i>    | <i>Agalinis obtusifolia</i>    | EU827926 |
| Eudicotyledons | Orobanchaceae  | <i>Agalinis</i>    | <i>Agalinis obtusifolia</i>    | EU827928 |
| Eudicotyledons | Orobanchaceae  | <i>Agalinis</i>    | <i>Agalinis obtusifolia</i>    | EU827929 |
| Eudicotyledons | Orobanchaceae  | <i>Agalinis</i>    | <i>Agalinis obtusifolia</i>    | EU827930 |
| Eudicotyledons | Orobanchaceae  | <i>Agalinis</i>    | <i>Agalinis plukenetii</i>     | EU827937 |
| Eudicotyledons | Orobanchaceae  | <i>Agalinis</i>    | <i>Agalinis plukenetii</i>     | EU827938 |
| Eudicotyledons | Orobanchaceae  | <i>Agalinis</i>    | <i>Agalinis pulchella</i>      | EU827939 |
| Eudicotyledons | Orobanchaceae  | <i>Agalinis</i>    | <i>Agalinis pulchella</i>      | EU827940 |
| Eudicotyledons | Orobanchaceae  | <i>Agalinis</i>    | <i>Agalinis setacea</i>        | GU943540 |
| Eudicotyledons | Orobanchaceae  | <i>Agalinis</i>    | <i>Agalinis setacea</i>        | GU943541 |
| Eudicotyledons | Orobanchaceae  | <i>Agalinis</i>    | <i>Agalinis setacea</i>        | EU827945 |
| Eudicotyledons | Orobanchaceae  | <i>Agalinis</i>    | <i>Agalinis setacea</i>        | EU827946 |
| Eudicotyledons | Orobanchaceae  | <i>Agalinis</i>    | <i>Agalinis strictifolia</i>   | EU827898 |
| Eudicotyledons | Orobanchaceae  | <i>Agalinis</i>    | <i>Agalinis strictifolia</i>   | EU827950 |
| Eudicotyledons | Orobanchaceae  | <i>Agalinis</i>    | <i>Agalinis tenella</i>        | GU943542 |
| Eudicotyledons | Orobanchaceae  | <i>Agalinis</i>    | <i>Agalinis tenella</i>        | GU943543 |
| Eudicotyledons | Orobanchaceae  | <i>Agalinis</i>    | <i>Agalinis tenella</i>        | EU827927 |
| Eudicotyledons | Orobanchaceae  | <i>Agalinis</i>    | <i>Agalinis tenella</i>        | EU827951 |
| Eudicotyledons | Orobanchaceae  | <i>Agalinis</i>    | <i>Agalinis tenella</i>        | EU827952 |
| Eudicotyledons | Orobanchaceae  | <i>Agalinis</i>    | <i>Agalinis tenella</i>        | EU827953 |
| Eudicotyledons | Orobanchaceae  | <i>Agalinis</i>    | <i>Agalinis tenella</i>        | EU827954 |
| Eudicotyledons | Orobanchaceae  | <i>Agalinis</i>    | <i>Agalinis tenella</i>        | EU827955 |
| Eudicotyledons | Orobanchaceae  | <i>Agalinis</i>    | <i>Agalinis tenuifolia</i>     | GU943544 |
| Eudicotyledons | Orobanchaceae  | <i>Agalinis</i>    | <i>Agalinis tenuifolia</i>     | EU827956 |
| Eudicotyledons | Orobanchaceae  | <i>Agalinis</i>    | <i>Agalinis tenuifolia</i>     | EU827957 |
| Eudicotyledons | Orobanchaceae  | <i>Agalinis</i>    | <i>Agalinis tenuifolia</i>     | EU827958 |
| Eudicotyledons | Ranunculaceae  | <i>Aconitum</i>    | <i>Aconitum albobviolaceum</i> | GQ337824 |
| Eudicotyledons | Ranunculaceae  | <i>Aconitum</i>    | <i>Aconitum albobviolaceum</i> | GQ337825 |
| Eudicotyledons | Ranunculaceae  | <i>Aconitum</i>    | <i>Aconitum albobviolaceum</i> | GQ337826 |
| Eudicotyledons | Ranunculaceae  | <i>Aconitum</i>    | <i>Aconitum albobviolaceum</i> | GQ337830 |
| Eudicotyledons | Ranunculaceae  | <i>Aconitum</i>    | <i>Aconitum albobviolaceum</i> | GQ337831 |
| Eudicotyledons | Ranunculaceae  | <i>Aconitum</i>    | <i>Aconitum albobviolaceum</i> | GQ337832 |
| Eudicotyledons | Ranunculaceae  | <i>Aconitum</i>    | <i>Aconitum albobviolaceum</i> | GQ337833 |
| Eudicotyledons | Ranunculaceae  | <i>Aconitum</i>    | <i>Aconitum albobviolaceum</i> | GQ337834 |
| Eudicotyledons | Ranunculaceae  | <i>Aconitum</i>    | <i>Aconitum albobviolaceum</i> | GQ337835 |
| Eudicotyledons | Ranunculaceae  | <i>Aconitum</i>    | <i>Aconitum albobviolaceum</i> | JN043731 |
| Eudicotyledons | Ranunculaceae  | <i>Aconitum</i>    | <i>Aconitum albobviolaceum</i> | JN043732 |
| Eudicotyledons | Ranunculaceae  | <i>Aconitum</i>    | <i>Aconitum albobviolaceum</i> | JN043733 |
| Eudicotyledons | Ranunculaceae  | <i>Aconitum</i>    | <i>Aconitum albobviolaceum</i> | JN043734 |
| Eudicotyledons | Ranunculaceae  | <i>Aconitum</i>    | <i>Aconitum albobviolaceum</i> | JN043735 |
| Eudicotyledons | Phyllanthaceae | <i>Phyllanthus</i> | <i>Phyllanthus debilis</i>     | GU598567 |
| Eudicotyledons | Phyllanthaceae | <i>Phyllanthus</i> | <i>Phyllanthus debilis</i>     | GU598568 |
| Eudicotyledons | Phyllanthaceae | <i>Phyllanthus</i> | <i>Phyllanthus debilis</i>     | GQ409810 |
| Eudicotyledons | Phyllanthaceae | <i>Phyllanthus</i> | <i>Phyllanthus debilis</i>     | GQ409811 |
| Eudicotyledons | Phyllanthaceae | <i>Phyllanthus</i> | <i>Phyllanthus debilis</i>     | GQ409812 |
| Eudicotyledons | Phyllanthaceae | <i>Phyllanthus</i> | <i>Phyllanthus amarus</i>      | GU598561 |
| Eudicotyledons | Phyllanthaceae | <i>Phyllanthus</i> | <i>Phyllanthus amarus</i>      | GU598562 |
| Eudicotyledons | Phyllanthaceae | <i>Phyllanthus</i> | <i>Phyllanthus amarus</i>      | GU598563 |
| Eudicotyledons | Phyllanthaceae | <i>Phyllanthus</i> | <i>Phyllanthus amarus</i>      | GU598564 |



|                |                |                    |                                    |          |
|----------------|----------------|--------------------|------------------------------------|----------|
| Eudicotyledons | Plumbaginaceae | <i>Limonium</i>    | <i>Limonium wrightii</i>           | AB450192 |
| Eudicotyledons | Plumbaginaceae | <i>Limonium</i>    | <i>Limonium sinense</i>            | AB450198 |
| Eudicotyledons | Plumbaginaceae | <i>Limonium</i>    | <i>Limonium sinense</i>            | AB450201 |
| Eudicotyledons | Plumbaginaceae | <i>Limonium</i>    | <i>Limonium sinense</i>            | AB450204 |
| Eudicotyledons | Plumbaginaceae | <i>Limonium</i>    | <i>Limonium sinense</i>            | AB450207 |
| Eudicotyledons | Plumbaginaceae | <i>Limonium</i>    | <i>Limonium sinense</i>            | AB450210 |
| Eudicotyledons | Plumbaginaceae | <i>Limonium</i>    | <i>Limonium tetragonum</i>         | AB450216 |
| Eudicotyledons | Plumbaginaceae | <i>Limonium</i>    | <i>Limonium tetragonum</i>         | AB450219 |
| Eudicotyledons | Plumbaginaceae | <i>Limonium</i>    | <i>Limonium tetragonum</i>         | AB450222 |
| Eudicotyledons | Phyllanthaceae | <i>Phyllanthus</i> | <i>Phyllanthus urinaria</i>        | GU598573 |
| Eudicotyledons | Phyllanthaceae | <i>Phyllanthus</i> | <i>Phyllanthus urinaria</i>        | GU598574 |
| Eudicotyledons | Phyllanthaceae | <i>Phyllanthus</i> | <i>Phyllanthus urinaria</i>        | GQ409813 |
| Eudicotyledons | Phyllanthaceae | <i>Phyllanthus</i> | <i>Phyllanthus urinaria</i>        | GQ409815 |
| Eudicotyledons | Fabaceae       | <i>Dalbergia</i>   | <i>Dalbergia nigrescens</i>        | FR854158 |
| Eudicotyledons | Fabaceae       | <i>Dalbergia</i>   | <i>Dalbergia nigrescens</i>        | FR854159 |
| Eudicotyledons | Fabaceae       | <i>Dalbergia</i>   | <i>Dalbergia nigrescens</i>        | FR854160 |
| Eudicotyledons | Fabaceae       | <i>Dalbergia</i>   | <i>Dalbergia nigrescens</i>        | FR854161 |
| Eudicotyledons | Fabaceae       | <i>Dalbergia</i>   | <i>Dalbergia nigrescens</i>        | FR854162 |
| Eudicotyledons | Phyllanthaceae | <i>Phyllanthus</i> | <i>Phyllanthus polyphyllus</i>     | GU598544 |
| Eudicotyledons | Phyllanthaceae | <i>Phyllanthus</i> | <i>Phyllanthus polyphyllus</i>     | GU598545 |
| Eudicotyledons | Phyllanthaceae | <i>Phyllanthus</i> | <i>Phyllanthus polyphyllus</i>     | GU598546 |
| Eudicotyledons | Gesneriaceae   | <i>Cyrtandra</i>   | <i>Cyrtandra kauaiensis</i>        | GQ475121 |
| Eudicotyledons | Gesneriaceae   | <i>Cyrtandra</i>   | <i>Cyrtandra kauaiensis</i>        | EU919999 |
| Eudicotyledons | Gesneriaceae   | <i>Cyrtandra</i>   | <i>Cyrtandra laxiflora</i>         | GQ475161 |
| Eudicotyledons | Gesneriaceae   | <i>Cyrtandra</i>   | <i>Cyrtandra laxiflora</i>         | EU920007 |
| Eudicotyledons | Gesneriaceae   | <i>Cyrtandra</i>   | <i>Cyrtandra samoensis</i>         | GQ475122 |
| Eudicotyledons | Gesneriaceae   | <i>Cyrtandra</i>   | <i>Cyrtandra samoensis</i>         | GQ475148 |
| Eudicotyledons | Gesneriaceae   | <i>Cyrtandra</i>   | <i>Cyrtandra samoensis</i>         | GQ475150 |
| Eudicotyledons | Gesneriaceae   | <i>Cyrtandra</i>   | <i>Cyrtandra samoensis</i>         | EU920001 |
| Eudicotyledons | Gesneriaceae   | <i>Cyrtandra</i>   | <i>Cyrtandra samoensis</i>         | EU920002 |
| Eudicotyledons | Primulaceae    | <i>Lysimachia</i>  | <i>Lysimachia alfredii</i>         | JN045291 |
| Eudicotyledons | Primulaceae    | <i>Lysimachia</i>  | <i>Lysimachia alfredii</i>         | JN045292 |
| Eudicotyledons | Primulaceae    | <i>Lysimachia</i>  | <i>Lysimachia capillipes</i>       | JN045295 |
| Eudicotyledons | Primulaceae    | <i>Lysimachia</i>  | <i>Lysimachia capillipes</i>       | JN045296 |
| Eudicotyledons | Ericaceae      | <i>Pieris</i>      | <i>Pieris japonica</i>             | HQ426995 |
| Eudicotyledons | Ericaceae      | <i>Pieris</i>      | <i>Pieris japonica</i>             | EU547719 |
| Eudicotyledons | Ericaceae      | <i>Pieris</i>      | <i>Pieris japonica</i>             | AB206621 |
| Eudicotyledons | Ericaceae      | <i>Pieris</i>      | <i>Pieris koidzumiana</i>          | AB206623 |
| Eudicotyledons | Ericaceae      | <i>Pieris</i>      | <i>Pieris koidzumiana</i>          | AB206624 |
| Eudicotyledons | Phyllanthaceae | <i>Phyllanthus</i> | <i>Phyllanthus maderaspatensis</i> | GU598536 |
| Eudicotyledons | Phyllanthaceae | <i>Phyllanthus</i> | <i>Phyllanthus maderaspatensis</i> | GU598537 |
| Eudicotyledons | Phyllanthaceae | <i>Phyllanthus</i> | <i>Phyllanthus maderaspatensis</i> | GU598538 |
| Eudicotyledons | Phyllanthaceae | <i>Phyllanthus</i> | <i>Phyllanthus maderaspatensis</i> | GU598575 |
| Eudicotyledons | Phyllanthaceae | <i>Phyllanthus</i> | <i>Phyllanthus maderaspatensis</i> | GU598576 |
| Eudicotyledons | Phyllanthaceae | <i>Phyllanthus</i> | <i>Phyllanthus rheedii</i>         | GQ409807 |
| Eudicotyledons | Phyllanthaceae | <i>Phyllanthus</i> | <i>Phyllanthus rheedii</i>         | GQ409809 |
| Eudicotyledons | Araliaceae     | <i>Schefflera</i>  | <i>Schefflera heptaphylla</i>      | HQ415433 |
| Eudicotyledons | Araliaceae     | <i>Schefflera</i>  | <i>Schefflera heptaphylla</i>      | JN406930 |
| Eudicotyledons | Araliaceae     | <i>Schefflera</i>  | <i>Schefflera heptaphylla</i>      | JN406931 |
| Eudicotyledons | Araliaceae     | <i>Schefflera</i>  | <i>Schefflera heptaphylla</i>      | JN406932 |
| Eudicotyledons | Araliaceae     | <i>Schefflera</i>  | <i>Schefflera heptaphylla</i>      | JN406933 |
| Eudicotyledons | Araliaceae     | <i>Schefflera</i>  | <i>Schefflera heptaphylla</i>      | JN406934 |
| Eudicotyledons | Araliaceae     | <i>Schefflera</i>  | <i>Schefflera heptaphylla</i>      | GU054831 |













|                |              |                    |                                  |          |
|----------------|--------------|--------------------|----------------------------------|----------|
| Eudicotyledons | Asteraceae   | <i>Solidago</i>    | <i>Solidago gigantea</i>         | EU337383 |
| Eudicotyledons | Asteraceae   | <i>Solidago</i>    | <i>Solidago gigantea</i>         | EU337384 |
| Eudicotyledons | Asteraceae   | <i>Solidago</i>    | <i>Solidago gigantea</i>         | EU337385 |
| Eudicotyledons | Asteraceae   | <i>Solidago</i>    | <i>Solidago gigantea</i>         | EU337386 |
| Eudicotyledons | Asteraceae   | <i>Solidago</i>    | <i>Solidago gigantea</i>         | EU337387 |
| Eudicotyledons | Asteraceae   | <i>Solidago</i>    | <i>Solidago gigantea</i>         | EU337388 |
| Eudicotyledons | Asteraceae   | <i>Solidago</i>    | <i>Solidago gigantea</i>         | EU337389 |
| Eudicotyledons | Asteraceae   | <i>Solidago</i>    | <i>Solidago gigantea</i>         | EU337390 |
| Eudicotyledons | Asteraceae   | <i>Solidago</i>    | <i>Solidago gigantea</i>         | EU337391 |
| Eudicotyledons | Asteraceae   | <i>Solidago</i>    | <i>Solidago gigantea</i>         | EU337392 |
| Eudicotyledons | Asteraceae   | <i>Solidago</i>    | <i>Solidago gigantea</i>         | DQ006153 |
| Eudicotyledons | Asteraceae   | <i>Solidago</i>    | <i>Solidago gigantea</i>         | HQ142551 |
| Eudicotyledons | Asteraceae   | <i>Solidago</i>    | <i>Solidago gigantea</i>         | HQ142552 |
| Eudicotyledons | Asteraceae   | <i>Solidago</i>    | <i>Solidago gigantea</i>         | HQ142553 |
| Eudicotyledons | Asteraceae   | <i>Solidago</i>    | <i>Solidago gigantea</i>         | HQ142554 |
| Eudicotyledons | Asteraceae   | <i>Solidago</i>    | <i>Solidago juncea</i>           | DQ006154 |
| Eudicotyledons | Asteraceae   | <i>Solidago</i>    | <i>Solidago juncea</i>           | HQ142560 |
| Eudicotyledons | Asteraceae   | <i>Solidago</i>    | <i>Solidago simplex</i>          | DQ006155 |
| Eudicotyledons | Asteraceae   | <i>Solidago</i>    | <i>Solidago simplex</i>          | HQ142543 |
| Eudicotyledons | Araliaceae   | <i>Dendropanax</i> | <i>Dendropanax sessiliflorus</i> | GU054812 |
| Eudicotyledons | Araliaceae   | <i>Dendropanax</i> | <i>Dendropanax sessiliflorus</i> | GU054826 |
| Eudicotyledons | Araliaceae   | <i>Dendropanax</i> | <i>Dendropanax sessiliflorus</i> | GU054881 |
| Eudicotyledons | Brassicaceae | <i>Cardamine</i>   | <i>Cardamine nipponica</i>       | AB365513 |
| Eudicotyledons | Brassicaceae | <i>Cardamine</i>   | <i>Cardamine nipponica</i>       | AB365514 |
| Eudicotyledons | Brassicaceae | <i>Cardamine</i>   | <i>Cardamine nipponica</i>       | AB365515 |
| Eudicotyledons | Brassicaceae | <i>Cardamine</i>   | <i>Cardamine nipponica</i>       | AB365516 |
| Eudicotyledons | Fabaceae     | <i>Senna</i>       | <i>Senna obtusifolia</i>         | GU396802 |
| Eudicotyledons | Fabaceae     | <i>Senna</i>       | <i>Senna obtusifolia</i>         | GU396803 |
| Eudicotyledons | Fabaceae     | <i>Senna</i>       | <i>Senna obtusifolia</i>         | GU396804 |
| Eudicotyledons | Fabaceae     | <i>Senna</i>       | <i>Senna obtusifolia</i>         | GU396805 |
| Eudicotyledons | Fabaceae     | <i>Senna</i>       | <i>Senna obtusifolia</i>         | GQ435431 |
| Eudicotyledons | Fabaceae     | <i>Senna</i>       | <i>Senna obtusifolia</i>         | GQ435432 |
| Eudicotyledons | Fabaceae     | <i>Senna</i>       | <i>Senna pallida</i>             | JF838364 |
| Eudicotyledons | Fabaceae     | <i>Senna</i>       | <i>Senna pallida</i>             | HQ161754 |
| Eudicotyledons | Fabaceae     | <i>Senna</i>       | <i>Senna siamea</i>              | GU969279 |
| Eudicotyledons | Fabaceae     | <i>Senna</i>       | <i>Senna siamea</i>              | HQ161767 |
| Eudicotyledons | Fabaceae     | <i>Senna</i>       | <i>Senna spectabilis</i>         | JF838360 |
| Eudicotyledons | Fabaceae     | <i>Senna</i>       | <i>Senna spectabilis</i>         | HQ161761 |
| Eudicotyledons | Fabaceae     | <i>Caesalpinia</i> | <i>Caesalpinia oyamae</i>        | DQ208785 |
| Eudicotyledons | Fabaceae     | <i>Caesalpinia</i> | <i>Caesalpinia oyamae</i>        | DQ208786 |
| Eudicotyledons | Fabaceae     | <i>Caesalpinia</i> | <i>Caesalpinia oyamae</i>        | DQ208787 |
| Eudicotyledons | Fabaceae     | <i>Caesalpinia</i> | <i>Caesalpinia oyamae</i>        | DQ208788 |
| Eudicotyledons | Fabaceae     | <i>Caesalpinia</i> | <i>Caesalpinia oyamae</i>        | DQ208789 |
| Eudicotyledons | Fabaceae     | <i>Caesalpinia</i> | <i>Caesalpinia oyamae</i>        | DQ208790 |
| Eudicotyledons | Fabaceae     | <i>Caesalpinia</i> | <i>Caesalpinia oyamae</i>        | DQ208791 |
| Eudicotyledons | Fabaceae     | <i>Caesalpinia</i> | <i>Caesalpinia oyamae</i>        | DQ208792 |
| Eudicotyledons | Fabaceae     | <i>Caesalpinia</i> | <i>Caesalpinia oyamae</i>        | DQ208793 |
| Eudicotyledons | Fabaceae     | <i>Caesalpinia</i> | <i>Caesalpinia oyamae</i>        | DQ208794 |
| Eudicotyledons | Fabaceae     | <i>Caesalpinia</i> | <i>Caesalpinia oyamae</i>        | DQ208795 |
| Eudicotyledons | Fabaceae     | <i>Caesalpinia</i> | <i>Caesalpinia oyamae</i>        | DQ208796 |
| Eudicotyledons | Fabaceae     | <i>Caesalpinia</i> | <i>Caesalpinia oyamae</i>        | DQ208797 |
| Eudicotyledons | Fabaceae     | <i>Caesalpinia</i> | <i>Caesalpinia oyamae</i>        | DQ208798 |
| Eudicotyledons | Fabaceae     | <i>Caesalpinia</i> | <i>Caesalpinia oyamae</i>        | DQ208799 |

|                |                |                    |                                     |          |
|----------------|----------------|--------------------|-------------------------------------|----------|
| Eudicotyledons | Fabaceae       | <i>Caesalpinia</i> | <i>Caesalpinia oyamae</i>           | DQ208800 |
| Eudicotyledons | Fabaceae       | <i>Caesalpinia</i> | <i>Caesalpinia oyamae</i>           | DQ208801 |
| Eudicotyledons | Fabaceae       | <i>Caesalpinia</i> | <i>Caesalpinia oyamae</i>           | DQ208802 |
| Eudicotyledons | Fabaceae       | <i>Caesalpinia</i> | <i>Caesalpinia oyamae</i>           | DQ208803 |
| Eudicotyledons | Fabaceae       | <i>Caesalpinia</i> | <i>Caesalpinia oyamae</i>           | DQ208804 |
| Eudicotyledons | Fabaceae       | <i>Caesalpinia</i> | <i>Caesalpinia oyamae</i>           | DQ208805 |
| Eudicotyledons | Fabaceae       | <i>Caesalpinia</i> | <i>Caesalpinia oyamae</i>           | DQ208806 |
| Eudicotyledons | Fabaceae       | <i>Caesalpinia</i> | <i>Caesalpinia oyamae</i>           | DQ208807 |
| Eudicotyledons | Fabaceae       | <i>Caesalpinia</i> | <i>Caesalpinia oyamae</i>           | DQ208808 |
| Eudicotyledons | Fabaceae       | <i>Caesalpinia</i> | <i>Caesalpinia epifanioi</i>        | DQ208825 |
| Eudicotyledons | Fabaceae       | <i>Caesalpinia</i> | <i>Caesalpinia epifanioi</i>        | DQ208826 |
| Eudicotyledons | Fabaceae       | <i>Caesalpinia</i> | <i>Caesalpinia epifanioi</i>        | DQ208827 |
| Eudicotyledons | Fabaceae       | <i>Caesalpinia</i> | <i>Caesalpinia epifanioi</i>        | DQ208828 |
| Eudicotyledons | Fabaceae       | <i>Caesalpinia</i> | <i>Caesalpinia epifanioi</i>        | DQ208829 |
| Eudicotyledons | Fabaceae       | <i>Caesalpinia</i> | <i>Caesalpinia epifanioi</i>        | DQ208830 |
| Eudicotyledons | Fabaceae       | <i>Caesalpinia</i> | <i>Caesalpinia melanadenia</i>      | DQ208831 |
| Eudicotyledons | Fabaceae       | <i>Caesalpinia</i> | <i>Caesalpinia melanadenia</i>      | DQ208832 |
| Eudicotyledons | Fabaceae       | <i>Caesalpinia</i> | <i>Caesalpinia melanadenia</i>      | DQ208833 |
| Eudicotyledons | Fabaceae       | <i>Caesalpinia</i> | <i>Caesalpinia melanadenia</i>      | DQ208834 |
| Eudicotyledons | Fabaceae       | <i>Caesalpinia</i> | <i>Caesalpinia melanadenia</i>      | DQ208835 |
| Eudicotyledons | Fabaceae       | <i>Caesalpinia</i> | <i>Caesalpinia macvaughii</i>       | DQ208836 |
| Eudicotyledons | Fabaceae       | <i>Caesalpinia</i> | <i>Caesalpinia macvaughii</i>       | DQ208837 |
| Eudicotyledons | Fabaceae       | <i>Caesalpinia</i> | <i>Caesalpinia macvaughii</i>       | DQ208838 |
| Eudicotyledons | Fabaceae       | <i>Caesalpinia</i> | <i>Caesalpinia macvaughii</i>       | DQ208839 |
| Eudicotyledons | Fabaceae       | <i>Caesalpinia</i> | <i>Caesalpinia macvaughii</i>       | DQ208840 |
| Eudicotyledons | Fabaceae       | <i>Caesalpinia</i> | <i>Caesalpinia macvaughii</i>       | DQ208841 |
| Eudicotyledons | Fabaceae       | <i>Caesalpinia</i> | <i>Caesalpinia macvaughii</i>       | DQ208842 |
| Eudicotyledons | Fabaceae       | <i>Caesalpinia</i> | <i>Caesalpinia macvaughii</i>       | DQ208843 |
| Eudicotyledons | Apiaceae       | <i>Peucedanum</i>  | <i>Peucedanum ledebourielloides</i> | JN046222 |
| Eudicotyledons | Apiaceae       | <i>Peucedanum</i>  | <i>Peucedanum ledebourielloides</i> | JN046223 |
| Eudicotyledons | Apiaceae       | <i>Peucedanum</i>  | <i>Peucedanum ledebourielloides</i> | JN046224 |
| Eudicotyledons | Lamiaceae      | <i>Vitex</i>       | <i>Vitex negundo</i>                | JQ319673 |
| Eudicotyledons | Lamiaceae      | <i>Vitex</i>       | <i>Vitex negundo</i>                | DQ304781 |
| Eudicotyledons | Lamiaceae      | <i>Vitex</i>       | <i>Vitex negundo</i>                | DQ304782 |
| Eudicotyledons | Lamiaceae      | <i>Vitex</i>       | <i>Vitex negundo</i>                | DQ304783 |
| Eudicotyledons | Fabaceae       | <i>Senna</i>       | <i>Senna tora</i>                   | GU969277 |
| Eudicotyledons | Fabaceae       | <i>Senna</i>       | <i>Senna tora</i>                   | HQ161762 |
| Eudicotyledons | Caprifoliaceae | <i>Lonicera</i>    | <i>Lonicera confusa</i>             | HM228523 |
| Eudicotyledons | Caprifoliaceae | <i>Lonicera</i>    | <i>Lonicera confusa</i>             | HM228524 |
| Eudicotyledons | Caprifoliaceae | <i>Lonicera</i>    | <i>Lonicera confusa</i>             | HM228525 |
| Eudicotyledons | Caprifoliaceae | <i>Lonicera</i>    | <i>Lonicera confusa</i>             | HM228526 |
| Eudicotyledons | Caprifoliaceae | <i>Lonicera</i>    | <i>Lonicera confusa</i>             | HM228527 |
| Eudicotyledons | Caprifoliaceae | <i>Lonicera</i>    | <i>Lonicera confusa</i>             | HM228528 |
| Eudicotyledons | Caprifoliaceae | <i>Lonicera</i>    | <i>Lonicera confusa</i>             | HM228529 |
| Eudicotyledons | Primulaceae    | <i>Primula</i>     | <i>Primula calliantha</i>           | JN046490 |
| Eudicotyledons | Primulaceae    | <i>Primula</i>     | <i>Primula calliantha</i>           | JN046491 |
| Eudicotyledons | Primulaceae    | <i>Primula</i>     | <i>Primula calliantha</i>           | JN046492 |
| Eudicotyledons | Primulaceae    | <i>Primula</i>     | <i>Primula chionantha</i>           | JN046495 |
| Eudicotyledons | Primulaceae    | <i>Primula</i>     | <i>Primula chionantha</i>           | JN046496 |
| Eudicotyledons | Primulaceae    | <i>Primula</i>     | <i>Primula chionantha</i>           | JN046497 |
| Eudicotyledons | Primulaceae    | <i>Primula</i>     | <i>Primula chionantha</i>           | JN046498 |
| Eudicotyledons | Primulaceae    | <i>Primula</i>     | <i>Primula chionantha</i>           | JN046499 |
| Eudicotyledons | Primulaceae    | <i>Primula</i>     | <i>Primula deflexa</i>              | JN046500 |

|                |                |                    |                                |          |
|----------------|----------------|--------------------|--------------------------------|----------|
| Eudicotyledons | Primulaceae    | <i>Primula</i>     | <i>Primula deflexa</i>         | JN046501 |
| Eudicotyledons | Primulaceae    | <i>Primula</i>     | <i>Primula deflexa</i>         | JN046502 |
| Eudicotyledons | Primulaceae    | <i>Primula</i>     | <i>Primula deflexa</i>         | JN046503 |
| Eudicotyledons | Primulaceae    | <i>Primula</i>     | <i>Primula fasciculata</i>     | JN046519 |
| Eudicotyledons | Primulaceae    | <i>Primula</i>     | <i>Primula fasciculata</i>     | JN046520 |
| Eudicotyledons | Primulaceae    | <i>Primula</i>     | <i>Primula fasciculata</i>     | JN046521 |
| Eudicotyledons | Primulaceae    | <i>Primula</i>     | <i>Primula heucherifolia</i>   | JN046526 |
| Eudicotyledons | Primulaceae    | <i>Primula</i>     | <i>Primula heucherifolia</i>   | JN046527 |
| Eudicotyledons | Apocynaceae    | <i>Fockea</i>      | <i>Fockea angustifolia</i>     | AM231758 |
| Eudicotyledons | Apocynaceae    | <i>Fockea</i>      | <i>Fockea angustifolia</i>     | AM231759 |
| Eudicotyledons | Apocynaceae    | <i>Fockea</i>      | <i>Fockea angustifolia</i>     | AM231760 |
| Eudicotyledons | Apocynaceae    | <i>Fockea</i>      | <i>Fockea angustifolia</i>     | AM231761 |
| Eudicotyledons | Apocynaceae    | <i>Fockea</i>      | <i>Fockea comaru</i>           | AM231763 |
| Eudicotyledons | Apocynaceae    | <i>Fockea</i>      | <i>Fockea comaru</i>           | AM231764 |
| Eudicotyledons | Orobanchaceae  | <i>Agalinis</i>    | <i>Agalinis purpurea</i>       | EU827941 |
| Eudicotyledons | Orobanchaceae  | <i>Agalinis</i>    | <i>Agalinis purpurea</i>       | EU827942 |
| Eudicotyledons | Orobanchaceae  | <i>Agalinis</i>    | <i>Agalinis purpurea</i>       | EU827943 |
| Eudicotyledons | Orobanchaceae  | <i>Agalinis</i>    | <i>Agalinis purpurea</i>       | EU827944 |
| Eudicotyledons | Amaranthaceae  | <i>Suaeda</i>      | <i>Suaeda glauca</i>           | JN047266 |
| Eudicotyledons | Amaranthaceae  | <i>Suaeda</i>      | <i>Suaeda glauca</i>           | JN047267 |
| Eudicotyledons | Amaranthaceae  | <i>Suaeda</i>      | <i>Suaeda glauca</i>           | JN047268 |
| Eudicotyledons | Amaranthaceae  | <i>Suaeda</i>      | <i>Suaeda glauca</i>           | JN047269 |
| Eudicotyledons | Lamiaceae      | <i>Vitex</i>       | <i>Vitex rotundifolia</i>      | JQ319674 |
| Eudicotyledons | Lamiaceae      | <i>Vitex</i>       | <i>Vitex rotundifolia</i>      | GQ435184 |
| Eudicotyledons | Phyllanthaceae | <i>Phyllanthus</i> | <i>Phyllanthus fraternus</i>   | GU598566 |
| Eudicotyledons | Phyllanthaceae | <i>Phyllanthus</i> | <i>Phyllanthus fraternus</i>   | GU598569 |
| Eudicotyledons | Polygonaceae   | <i>Persicaria</i>  | <i>Persicaria lapathifolia</i> | EF653755 |
| Eudicotyledons | Polygonaceae   | <i>Persicaria</i>  | <i>Persicaria lapathifolia</i> | EU196983 |
| Eudicotyledons | Polygonaceae   | <i>Persicaria</i>  | <i>Persicaria lapathifolia</i> | EU196984 |
| Eudicotyledons | Polygonaceae   | <i>Persicaria</i>  | <i>Persicaria lapathifolia</i> | FJ503036 |
| Eudicotyledons | Ranunculaceae  | <i>Pulsatilla</i>  | <i>Pulsatilla vernalis</i>     | EF597126 |
| Eudicotyledons | Ranunculaceae  | <i>Pulsatilla</i>  | <i>Pulsatilla vernalis</i>     | EF597127 |
| Eudicotyledons | Ranunculaceae  | <i>Pulsatilla</i>  | <i>Pulsatilla vernalis</i>     | EF597128 |
| Eudicotyledons | Ranunculaceae  | <i>Pulsatilla</i>  | <i>Pulsatilla vernalis</i>     | EF597129 |
| Eudicotyledons | Ranunculaceae  | <i>Pulsatilla</i>  | <i>Pulsatilla vernalis</i>     | EF597130 |
| Eudicotyledons | Ranunculaceae  | <i>Pulsatilla</i>  | <i>Pulsatilla vernalis</i>     | EF597131 |
| Eudicotyledons | Ranunculaceae  | <i>Pulsatilla</i>  | <i>Pulsatilla vernalis</i>     | EF597132 |
| Eudicotyledons | Ranunculaceae  | <i>Pulsatilla</i>  | <i>Pulsatilla vernalis</i>     | EF597133 |
| Eudicotyledons | Ranunculaceae  | <i>Pulsatilla</i>  | <i>Pulsatilla vernalis</i>     | EF597144 |
| Eudicotyledons | Ranunculaceae  | <i>Pulsatilla</i>  | <i>Pulsatilla vernalis</i>     | EF597145 |
| Eudicotyledons | Ranunculaceae  | <i>Pulsatilla</i>  | <i>Pulsatilla vulgaris</i>     | EF597134 |
| Eudicotyledons | Ranunculaceae  | <i>Pulsatilla</i>  | <i>Pulsatilla vulgaris</i>     | EF597136 |
| Eudicotyledons | Malvaceae      | <i>Lavatera</i>    | <i>Lavatera flava</i>          | EF419551 |
| Eudicotyledons | Malvaceae      | <i>Lavatera</i>    | <i>Lavatera flava</i>          | EF419552 |
| Eudicotyledons | Malvaceae      | <i>Lavatera</i>    | <i>Lavatera maroccana</i>      | EF419563 |
| Eudicotyledons | Malvaceae      | <i>Lavatera</i>    | <i>Lavatera maroccana</i>      | EF419564 |
| Eudicotyledons | Malvaceae      | <i>Lavatera</i>    | <i>Lavatera mauritanica</i>    | EF419581 |
| Eudicotyledons | Malvaceae      | <i>Lavatera</i>    | <i>Lavatera mauritanica</i>    | EF419582 |
| Eudicotyledons | Malvaceae      | <i>Lavatera</i>    | <i>Lavatera mauritanica</i>    | EF419583 |
| Eudicotyledons | Malvaceae      | <i>Lavatera</i>    | <i>Lavatera mauritanica</i>    | EF419584 |
| Eudicotyledons | Malvaceae      | <i>Lavatera</i>    | <i>Lavatera punctata</i>       | EF419565 |
| Eudicotyledons | Malvaceae      | <i>Lavatera</i>    | <i>Lavatera punctata</i>       | EF419566 |
| Eudicotyledons | Caprifoliaceae | <i>Lonicera</i>    | <i>Lonicera hispida</i>        | JN045246 |

|                |                |                   |                               |          |
|----------------|----------------|-------------------|-------------------------------|----------|
| Eudicotyledons | Caprifoliaceae | <i>Lonicera</i>   | <i>Lonicera hispida</i>       | JN045247 |
| Eudicotyledons | Caprifoliaceae | <i>Lonicera</i>   | <i>Lonicera hispida</i>       | JN045248 |
| Eudicotyledons | Caprifoliaceae | <i>Lonicera</i>   | <i>Lonicera hispida</i>       | JN045249 |
| Eudicotyledons | Caprifoliaceae | <i>Lonicera</i>   | <i>Lonicera hispida</i>       | JN045250 |
| Eudicotyledons | Caprifoliaceae | <i>Lonicera</i>   | <i>Lonicera rupicola</i>      | JN045255 |
| Eudicotyledons | Caprifoliaceae | <i>Lonicera</i>   | <i>Lonicera rupicola</i>      | JN045256 |
| Eudicotyledons | Caprifoliaceae | <i>Lonicera</i>   | <i>Lonicera rupicola</i>      | JN045257 |
| Eudicotyledons | Caprifoliaceae | <i>Lonicera</i>   | <i>Lonicera rupicola</i>      | JN045258 |
| Eudicotyledons | Caprifoliaceae | <i>Lonicera</i>   | <i>Lonicera rupicola</i>      | JN045259 |
| Eudicotyledons | Polygonaceae   | <i>Persicaria</i> | <i>Persicaria nepalensis</i>  | EF653742 |
| Eudicotyledons | Polygonaceae   | <i>Persicaria</i> | <i>Persicaria nepalensis</i>  | JN046437 |
| Eudicotyledons | Polygonaceae   | <i>Persicaria</i> | <i>Persicaria nepalensis</i>  | JN046438 |
| Eudicotyledons | Polygonaceae   | <i>Persicaria</i> | <i>Persicaria nepalensis</i>  | JN046439 |
| Eudicotyledons | Asteraceae     | <i>Leucogenes</i> | <i>Leucogenes neglecta</i>    | EU007665 |
| Eudicotyledons | Asteraceae     | <i>Leucogenes</i> | <i>Leucogenes neglecta</i>    | EU007666 |
| Eudicotyledons | Asteraceae     | <i>Leucogenes</i> | <i>Leucogenes neglecta</i>    | EU007667 |
| Eudicotyledons | Asteraceae     | <i>Leucogenes</i> | <i>Leucogenes neglecta</i>    | EU007668 |
| Eudicotyledons | Lamiaceae      | <i>Lamium</i>     | <i>Lamium tomentosum</i>      | JF780184 |
| Eudicotyledons | Lamiaceae      | <i>Lamium</i>     | <i>Lamium tomentosum</i>      | JF780185 |
| Eudicotyledons | Lamiaceae      | <i>Lamium</i>     | <i>Lamium tomentosum</i>      | JF780186 |
| Eudicotyledons | Lamiaceae      | <i>Lamium</i>     | <i>Lamium tomentosum</i>      | JF780187 |
| Eudicotyledons | Polygonaceae   | <i>Persicaria</i> | <i>Persicaria maculosa</i>    | EU196988 |
| Eudicotyledons | Polygonaceae   | <i>Persicaria</i> | <i>Persicaria maculosa</i>    | EU750492 |
| Eudicotyledons | Polygonaceae   | <i>Persicaria</i> | <i>Persicaria maculosa</i>    | EU750493 |
| Eudicotyledons | Polygonaceae   | <i>Persicaria</i> | <i>Persicaria maculosa</i>    | EU750494 |
| Eudicotyledons | Rubiaceae      | <i>Hedyotis</i>   | <i>Hedyotis auricularia</i>   | JF699765 |
| Eudicotyledons | Rubiaceae      | <i>Hedyotis</i>   | <i>Hedyotis auricularia</i>   | JF699766 |
| Eudicotyledons | Rubiaceae      | <i>Hedyotis</i>   | <i>Hedyotis auricularia</i>   | JN044758 |
| Eudicotyledons | Rubiaceae      | <i>Hedyotis</i>   | <i>Hedyotis auricularia</i>   | JN044759 |
| Eudicotyledons | Rubiaceae      | <i>Hedyotis</i>   | <i>Hedyotis biflora</i>       | JF699767 |
| Eudicotyledons | Rubiaceae      | <i>Hedyotis</i>   | <i>Hedyotis biflora</i>       | JF699768 |
| Eudicotyledons | Rubiaceae      | <i>Hedyotis</i>   | <i>Hedyotis biflora</i>       | JF699769 |
| Eudicotyledons | Rubiaceae      | <i>Hedyotis</i>   | <i>Hedyotis costata</i>       | JF699787 |
| Eudicotyledons | Rubiaceae      | <i>Hedyotis</i>   | <i>Hedyotis costata</i>       | JN044773 |
| Eudicotyledons | Rubiaceae      | <i>Hedyotis</i>   | <i>Hedyotis costata</i>       | JN044774 |
| Eudicotyledons | Rubiaceae      | <i>Hedyotis</i>   | <i>Hedyotis effusa</i>        | JF699790 |
| Eudicotyledons | Rubiaceae      | <i>Hedyotis</i>   | <i>Hedyotis effusa</i>        | JF699791 |
| Eudicotyledons | Rubiaceae      | <i>Hedyotis</i>   | <i>Hedyotis effusa</i>        | JN044775 |
| Eudicotyledons | Rubiaceae      | <i>Hedyotis</i>   | <i>Hedyotis effusa</i>        | JN044776 |
| Eudicotyledons | Rubiaceae      | <i>Hedyotis</i>   | <i>Hedyotis verticillata</i>  | JF699816 |
| Eudicotyledons | Rubiaceae      | <i>Hedyotis</i>   | <i>Hedyotis verticillata</i>  | JF699817 |
| Eudicotyledons | Rubiaceae      | <i>Hedyotis</i>   | <i>Hedyotis verticillata</i>  | JF699818 |
| Eudicotyledons | Rubiaceae      | <i>Hedyotis</i>   | <i>Hedyotis verticillata</i>  | JF699819 |
| Eudicotyledons | Rubiaceae      | <i>Hedyotis</i>   | <i>Hedyotis yangchunensis</i> | JF699821 |
| Eudicotyledons | Rubiaceae      | <i>Hedyotis</i>   | <i>Hedyotis yangchunensis</i> | JF699822 |
| Eudicotyledons | Rubiaceae      | <i>Hedyotis</i>   | <i>Hedyotis yangchunensis</i> | JF699823 |
| Eudicotyledons | Rubiaceae      | <i>Hedyotis</i>   | <i>Hedyotis yangchunensis</i> | JN044791 |
| Eudicotyledons | Rubiaceae      | <i>Hedyotis</i>   | <i>Hedyotis yangchunensis</i> | JN044792 |
| Eudicotyledons | Asteraceae     | <i>Solidago</i>   | <i>Solidago virgaurea</i>     | EU337703 |
| Eudicotyledons | Asteraceae     | <i>Solidago</i>   | <i>Solidago virgaurea</i>     | EU337704 |
| Eudicotyledons | Asteraceae     | <i>Solidago</i>   | <i>Solidago virgaurea</i>     | EU337705 |
| Eudicotyledons | Polygonaceae   | <i>Persicaria</i> | <i>Persicaria glabra</i>      | EU196973 |
| Eudicotyledons | Polygonaceae   | <i>Persicaria</i> | <i>Persicaria glabra</i>      | EU196974 |

|                |               |                      |                                    |          |
|----------------|---------------|----------------------|------------------------------------|----------|
| Eudicotyledons | Asteraceae    | <i>Solidago</i>      | <i>Solidago caesia</i>             | EU750561 |
| Eudicotyledons | Asteraceae    | <i>Solidago</i>      | <i>Solidago caesia</i>             | EU750562 |
| Eudicotyledons | Asteraceae    | <i>Solidago</i>      | <i>Solidago caesia</i>             | HQ142546 |
| Eudicotyledons | Asteraceae    | <i>Solidago</i>      | <i>Solidago nemoralis</i>          | EU750567 |
| Eudicotyledons | Asteraceae    | <i>Solidago</i>      | <i>Solidago nemoralis</i>          | EU750568 |
| Eudicotyledons | Asteraceae    | <i>Solidago</i>      | <i>Solidago nemoralis</i>          | EU750569 |
| Eudicotyledons | Asteraceae    | <i>Solidago</i>      | <i>Solidago nemoralis</i>          | HQ142555 |
| Eudicotyledons | Brassicaceae  | <i>Pugionium</i>     | <i>Pugionium dolabratum</i>        | JN046694 |
| Eudicotyledons | Brassicaceae  | <i>Pugionium</i>     | <i>Pugionium dolabratum</i>        | JN046695 |
| Eudicotyledons | Brassicaceae  | <i>Pugionium</i>     | <i>Pugionium dolabratum</i>        | JN046696 |
| Eudicotyledons | Brassicaceae  | <i>Pugionium</i>     | <i>Pugionium dolabratum</i>        | JN046697 |
| Eudicotyledons | Brassicaceae  | <i>Pugionium</i>     | <i>Pugionium dolabratum</i>        | JN046698 |
| Eudicotyledons | Fabaceae      | <i>Caesalpinia</i>   | <i>Caesalpinia sappan</i>          | GU396795 |
| Eudicotyledons | Fabaceae      | <i>Caesalpinia</i>   | <i>Caesalpinia sappan</i>          | GQ435369 |
| Eudicotyledons | Fabaceae      | <i>Caesalpinia</i>   | <i>Caesalpinia sappan</i>          | GQ435370 |
| Eudicotyledons | Polygonaceae  | <i>Persicaria</i>    | <i>Persicaria hirsuta</i>          | EU196975 |
| Eudicotyledons | Polygonaceae  | <i>Persicaria</i>    | <i>Persicaria hirsuta</i>          | EU196976 |
| Eudicotyledons | Polygonaceae  | <i>Persicaria</i>    | <i>Persicaria hydropiperoides</i>  | EU196978 |
| Eudicotyledons | Polygonaceae  | <i>Persicaria</i>    | <i>Persicaria hydropiperoides</i>  | EU196979 |
| Eudicotyledons | Polygonaceae  | <i>Persicaria</i>    | <i>Persicaria hydropiperoides</i>  | EU196980 |
| Eudicotyledons | Polygonaceae  | <i>Persicaria</i>    | <i>Persicaria minor</i>            | EU196990 |
| Eudicotyledons | Polygonaceae  | <i>Persicaria</i>    | <i>Persicaria minor</i>            | EU196991 |
| Eudicotyledons | Polygonaceae  | <i>Persicaria</i>    | <i>Persicaria viscosa</i>          | EU197008 |
| Eudicotyledons | Polygonaceae  | <i>Persicaria</i>    | <i>Persicaria viscosa</i>          | JF708227 |
| Eudicotyledons | Apiaceae      | <i>Pleurospermum</i> | <i>Pleurospermum franchetianum</i> | JN046387 |
| Eudicotyledons | Apiaceae      | <i>Pleurospermum</i> | <i>Pleurospermum franchetianum</i> | JN046388 |
| Eudicotyledons | Fabaceae      | <i>Dalbergia</i>     | <i>Dalbergia odorifera</i>         | GU396739 |
| Eudicotyledons | Fabaceae      | <i>Dalbergia</i>     | <i>Dalbergia odorifera</i>         | GQ434964 |
| Eudicotyledons | Asteraceae    | <i>Solidago</i>      | <i>Solidago lepida</i>             | EU337701 |
| Eudicotyledons | Asteraceae    | <i>Solidago</i>      | <i>Solidago lepida</i>             | EU337702 |
| Eudicotyledons | Asteraceae    | <i>Soroseris</i>     | <i>Soroseris glomerata</i>         | HQ436182 |
| Eudicotyledons | Asteraceae    | <i>Soroseris</i>     | <i>Soroseris glomerata</i>         | HQ436183 |
| Eudicotyledons | Asteraceae    | <i>Soroseris</i>     | <i>Soroseris glomerata</i>         | HQ436184 |
| Eudicotyledons | Asteraceae    | <i>Soroseris</i>     | <i>Soroseris glomerata</i>         | JN047247 |
| Eudicotyledons | Asteraceae    | <i>Soroseris</i>     | <i>Soroseris glomerata</i>         | JN047248 |
| Eudicotyledons | Asteraceae    | <i>Solidago</i>      | <i>Solidago rugosa</i>             | JQ246439 |
| Eudicotyledons | Asteraceae    | <i>Solidago</i>      | <i>Solidago rugosa</i>             | HQ596852 |
| Eudicotyledons | Asteraceae    | <i>Solidago</i>      | <i>Solidago rugosa</i>             | EU750570 |
| Eudicotyledons | Asteraceae    | <i>Solidago</i>      | <i>Solidago rugosa</i>             | EU750571 |
| Eudicotyledons | Asteraceae    | <i>Solidago</i>      | <i>Solidago rugosa</i>             | EU750572 |
| Eudicotyledons | Asteraceae    | <i>Solidago</i>      | <i>Solidago rugosa</i>             | HQ142557 |
| Eudicotyledons | Polygonaceae  | <i>Polygonum</i>     | <i>Polygonum sinomontanum</i>      | JN046445 |
| Eudicotyledons | Polygonaceae  | <i>Polygonum</i>     | <i>Polygonum sinomontanum</i>      | JN046446 |
| Eudicotyledons | Orobanchaceae | <i>Agalinis</i>      | <i>Agalinis decemloba</i>          | GU943533 |
| Eudicotyledons | Orobanchaceae | <i>Agalinis</i>      | <i>Agalinis decemloba</i>          | GU943534 |
| Eudicotyledons | Orobanchaceae | <i>Agalinis</i>      | <i>Agalinis decemloba</i>          | GU943535 |
| Eudicotyledons | Orobanchaceae | <i>Agalinis</i>      | <i>Agalinis decemloba</i>          | EU827899 |
| Eudicotyledons | Orobanchaceae | <i>Agalinis</i>      | <i>Agalinis decemloba</i>          | EU827900 |
| Eudicotyledons | Orobanchaceae | <i>Agalinis</i>      | <i>Agalinis gattingeri</i>         | EU827909 |
| Eudicotyledons | Orobanchaceae | <i>Agalinis</i>      | <i>Agalinis gattingeri</i>         | EU827910 |
| Eudicotyledons | Orobanchaceae | <i>Agalinis</i>      | <i>Agalinis gattingeri</i>         | EU827911 |
| Eudicotyledons | Orobanchaceae | <i>Agalinis</i>      | <i>Agalinis harperi</i>            | EU827912 |
| Eudicotyledons | Orobanchaceae | <i>Agalinis</i>      | <i>Agalinis harperi</i>            | EU827913 |

|                |                |                  |                                    |          |
|----------------|----------------|------------------|------------------------------------|----------|
| Eudicotyledons | Orobanchaceae  | <i>Agalinis</i>  | <i>Agalinis homalantha</i>         | EU827916 |
| Eudicotyledons | Orobanchaceae  | <i>Agalinis</i>  | <i>Agalinis homalantha</i>         | EU827917 |
| Eudicotyledons | Orobanchaceae  | <i>Agalinis</i>  | <i>Agalinis laxa</i>               | EU827918 |
| Eudicotyledons | Orobanchaceae  | <i>Agalinis</i>  | <i>Agalinis laxa</i>               | EU827919 |
| Eudicotyledons | Orobanchaceae  | <i>Agalinis</i>  | <i>Agalinis maritima</i>           | EU827897 |
| Eudicotyledons | Orobanchaceae  | <i>Agalinis</i>  | <i>Agalinis maritima</i>           | EU827922 |
| Eudicotyledons | Orobanchaceae  | <i>Agalinis</i>  | <i>Agalinis navasotensis</i>       | EU827923 |
| Eudicotyledons | Orobanchaceae  | <i>Agalinis</i>  | <i>Agalinis navasotensis</i>       | EU827924 |
| Eudicotyledons | Orobanchaceae  | <i>Agalinis</i>  | <i>Agalinis oligophylla</i>        | EU827931 |
| Eudicotyledons | Orobanchaceae  | <i>Agalinis</i>  | <i>Agalinis oligophylla</i>        | EU827932 |
| Eudicotyledons | Orobanchaceae  | <i>Agalinis</i>  | <i>Agalinis oligophylla</i>        | EU827933 |
| Eudicotyledons | Orobanchaceae  | <i>Agalinis</i>  | <i>Agalinis oligophylla</i>        | EU827934 |
| Eudicotyledons | Orobanchaceae  | <i>Agalinis</i>  | <i>Agalinis paupercula</i>         | EU827935 |
| Eudicotyledons | Orobanchaceae  | <i>Agalinis</i>  | <i>Agalinis paupercula</i>         | EU827936 |
| Eudicotyledons | Orobanchaceae  | <i>Agalinis</i>  | <i>Agalinis skinneriana</i>        | EU827947 |
| Eudicotyledons | Orobanchaceae  | <i>Agalinis</i>  | <i>Agalinis skinneriana</i>        | EU827948 |
| Eudicotyledons | Orobanchaceae  | <i>Agalinis</i>  | <i>Agalinis skinneriana</i>        | EU827949 |
| Eudicotyledons | Orobanchaceae  | <i>Agalinis</i>  | <i>Agalinis viridis</i>            | EU827959 |
| Eudicotyledons | Orobanchaceae  | <i>Agalinis</i>  | <i>Agalinis viridis</i>            | EU827960 |
| Eudicotyledons | Fabaceae       | <i>Lespedeza</i> | <i>Lespedeza bicolor</i>           | GU396760 |
| Eudicotyledons | Fabaceae       | <i>Lespedeza</i> | <i>Lespedeza bicolor</i>           | GU572290 |
| Eudicotyledons | Brassicaceae   | <i>Pugionium</i> | <i>Pugionium cornutum</i>          | JN046689 |
| Eudicotyledons | Brassicaceae   | <i>Pugionium</i> | <i>Pugionium cornutum</i>          | JN046690 |
| Eudicotyledons | Brassicaceae   | <i>Pugionium</i> | <i>Pugionium cornutum</i>          | JN046691 |
| Eudicotyledons | Brassicaceae   | <i>Pugionium</i> | <i>Pugionium cornutum</i>          | JN046692 |
| Eudicotyledons | Brassicaceae   | <i>Pugionium</i> | <i>Pugionium cornutum</i>          | JN046693 |
| Eudicotyledons | Brassicaceae   | <i>Cardamine</i> | <i>Cardamine tangutorum</i>        | JN044169 |
| Eudicotyledons | Brassicaceae   | <i>Cardamine</i> | <i>Cardamine tangutorum</i>        | JN044170 |
| Eudicotyledons | Brassicaceae   | <i>Cardamine</i> | <i>Cardamine tangutorum</i>        | JN044171 |
| Eudicotyledons | Brassicaceae   | <i>Cardamine</i> | <i>Cardamine tangutorum</i>        | JN044172 |
| Eudicotyledons | Caprifoliaceae | <i>Lonicera</i>  | <i>Lonicera acuminata</i>          | HM228516 |
| Eudicotyledons | Caprifoliaceae | <i>Lonicera</i>  | <i>Lonicera acuminata</i>          | HM228517 |
| Eudicotyledons | Caprifoliaceae | <i>Lonicera</i>  | <i>Lonicera trichosantha</i>       | JN045260 |
| Eudicotyledons | Caprifoliaceae | <i>Lonicera</i>  | <i>Lonicera trichosantha</i>       | JN045261 |
| Eudicotyledons | Gesneriaceae   | <i>Cyrtandra</i> | <i>Cyrtandra anthropophagorum</i>  | GQ475119 |
| Eudicotyledons | Gesneriaceae   | <i>Cyrtandra</i> | <i>Cyrtandra anthropophagorum</i>  | GQ475120 |
| Eudicotyledons | Gesneriaceae   | <i>Cyrtandra</i> | <i>Cyrtandra anthropophagorum</i>  | EU920042 |
| Eudicotyledons | Gesneriaceae   | <i>Cyrtandra</i> | <i>Cyrtandra calpidicarpa</i>      | GQ475123 |
| Eudicotyledons | Gesneriaceae   | <i>Cyrtandra</i> | <i>Cyrtandra calpidicarpa</i>      | GQ475164 |
| Eudicotyledons | Gesneriaceae   | <i>Cyrtandra</i> | <i>Cyrtandra calpidicarpa</i>      | EU920010 |
| Eudicotyledons | Gesneriaceae   | <i>Cyrtandra</i> | <i>Cyrtandra feaniana</i>          | GQ475130 |
| Eudicotyledons | Gesneriaceae   | <i>Cyrtandra</i> | <i>Cyrtandra feaniana</i>          | EU920019 |
| Eudicotyledons | Gesneriaceae   | <i>Cyrtandra</i> | <i>Cyrtandra kaulantha</i>         | GQ475160 |
| Eudicotyledons | Gesneriaceae   | <i>Cyrtandra</i> | <i>Cyrtandra kaulantha</i>         | EU920011 |
| Eudicotyledons | Gesneriaceae   | <i>Cyrtandra</i> | <i>Cyrtandra munroi</i>            | GQ475134 |
| Eudicotyledons | Gesneriaceae   | <i>Cyrtandra</i> | <i>Cyrtandra munroi</i>            | GQ475155 |
| Eudicotyledons | Gesneriaceae   | <i>Cyrtandra</i> | <i>Cyrtandra richii</i>            | GQ475127 |
| Eudicotyledons | Gesneriaceae   | <i>Cyrtandra</i> | <i>Cyrtandra richii</i>            | EU920028 |
| Eudicotyledons | Gesneriaceae   | <i>Cyrtandra</i> | <i>Cyrtandra sp. Plunkett 1843</i> | GQ475118 |
| Eudicotyledons | Gesneriaceae   | <i>Cyrtandra</i> | <i>Cyrtandra sp. Plunkett 1843</i> | EU919993 |
| Eudicotyledons | Gesneriaceae   | <i>Cyrtandra</i> | <i>Cyrtandra wagneri</i>           | GQ475115 |
| Eudicotyledons | Gesneriaceae   | <i>Cyrtandra</i> | <i>Cyrtandra wagneri</i>           | GQ475116 |
| Eudicotyledons | Gesneriaceae   | <i>Cyrtandra</i> | <i>Cyrtandra wagneri</i>           | EU919991 |

|                |                |                      |                                    |          |
|----------------|----------------|----------------------|------------------------------------|----------|
| Eudicotyledons | Fabaceae       | <i>Lespedeza</i>     | <i>Lespedeza floribunda</i>        | GU396761 |
| Eudicotyledons | Fabaceae       | <i>Lespedeza</i>     | <i>Lespedeza floribunda</i>        | GU572299 |
| Eudicotyledons | Hydrangeaceae  | <i>Schizophragma</i> | <i>Schizophragma integrifolium</i> | FJ647143 |
| Eudicotyledons | Hydrangeaceae  | <i>Schizophragma</i> | <i>Schizophragma integrifolium</i> | HM217002 |
| Eudicotyledons | Fabaceae       | <i>Dalbergia</i>     | <i>Dalbergia tonkinensis</i>       | FR854163 |
| Eudicotyledons | Fabaceae       | <i>Dalbergia</i>     | <i>Dalbergia tonkinensis</i>       | FR854164 |
| Eudicotyledons | Fabaceae       | <i>Dalbergia</i>     | <i>Dalbergia tonkinensis</i>       | FR854165 |
| Eudicotyledons | Fabaceae       | <i>Dalbergia</i>     | <i>Dalbergia tonkinensis</i>       | FR854166 |
| Eudicotyledons | Fabaceae       | <i>Dalbergia</i>     | <i>Dalbergia tonkinensis</i>       | FR854167 |
| Eudicotyledons | Orobanchaceae  | <i>Castilleja</i>    | <i>Castilleja rhexiifolia</i>      | FJ765695 |
| Eudicotyledons | Orobanchaceae  | <i>Castilleja</i>    | <i>Castilleja rhexiifolia</i>      | FJ765696 |
| Eudicotyledons | Orobanchaceae  | <i>Castilleja</i>    | <i>Castilleja rhexiifolia</i>      | FJ765697 |
| Eudicotyledons | Orobanchaceae  | <i>Castilleja</i>    | <i>Castilleja rhexiifolia</i>      | FJ765698 |
| Eudicotyledons | Orobanchaceae  | <i>Castilleja</i>    | <i>Castilleja rhexiifolia</i>      | FJ765699 |
| Eudicotyledons | Orobanchaceae  | <i>Castilleja</i>    | <i>Castilleja rhexiifolia</i>      | FJ765700 |
| Eudicotyledons | Orobanchaceae  | <i>Castilleja</i>    | <i>Castilleja rhexiifolia</i>      | FJ765701 |
| Eudicotyledons | Orobanchaceae  | <i>Castilleja</i>    | <i>Castilleja rhexiifolia</i>      | FJ765702 |
| Eudicotyledons | Orobanchaceae  | <i>Castilleja</i>    | <i>Castilleja rhexiifolia</i>      | FJ765703 |
| Eudicotyledons | Orobanchaceae  | <i>Castilleja</i>    | <i>Castilleja rhexiifolia</i>      | FJ765704 |
| Eudicotyledons | Orobanchaceae  | <i>Castilleja</i>    | <i>Castilleja rhexiifolia</i>      | FJ765705 |
| Eudicotyledons | Orobanchaceae  | <i>Castilleja</i>    | <i>Castilleja rhexiifolia</i>      | FJ765706 |
| Eudicotyledons | Orobanchaceae  | <i>Castilleja</i>    | <i>Castilleja rhexiifolia</i>      | FJ765707 |
| Eudicotyledons | Orobanchaceae  | <i>Castilleja</i>    | <i>Castilleja rhexiifolia</i>      | FJ765708 |
| Eudicotyledons | Rosaceae       | <i>Dasiphora</i>     | <i>Dasiphora davurica</i>          | JN044366 |
| Eudicotyledons | Rosaceae       | <i>Dasiphora</i>     | <i>Dasiphora davurica</i>          | JN044367 |
| Eudicotyledons | Rosaceae       | <i>Dasiphora</i>     | <i>Dasiphora davurica</i>          | JN044368 |
| Eudicotyledons | Rosaceae       | <i>Dasiphora</i>     | <i>Dasiphora davurica</i>          | JN044369 |
| Eudicotyledons | Rosaceae       | <i>Dasiphora</i>     | <i>Dasiphora davurica</i>          | JN044370 |
| Eudicotyledons | Rosaceae       | <i>Dasiphora</i>     | <i>Dasiphora davurica</i>          | JN044371 |
| Eudicotyledons | Rosaceae       | <i>Dasiphora</i>     | <i>Dasiphora davurica</i>          | JN044372 |
| Eudicotyledons | Caprifoliaceae | <i>Lonicera</i>      | <i>Lonicera hypoglauca</i>         | JN045251 |
| Eudicotyledons | Caprifoliaceae | <i>Lonicera</i>      | <i>Lonicera hypoglauca</i>         | HM228518 |
| Eudicotyledons | Caprifoliaceae | <i>Lonicera</i>      | <i>Lonicera hypoglauca</i>         | HM228519 |
| Eudicotyledons | Caprifoliaceae | <i>Lonicera</i>      | <i>Lonicera hypoglauca</i>         | HM228520 |
| Eudicotyledons | Caprifoliaceae | <i>Lonicera</i>      | <i>Lonicera hypoglauca</i>         | HM228521 |
| Eudicotyledons | Caprifoliaceae | <i>Lonicera</i>      | <i>Lonicera hypoglauca</i>         | HM228522 |
| Eudicotyledons | Caprifoliaceae | <i>Lonicera</i>      | <i>Lonicera macranthoides</i>      | GQ435288 |
| Eudicotyledons | Caprifoliaceae | <i>Lonicera</i>      | <i>Lonicera macranthoides</i>      | HM228530 |
| Eudicotyledons | Caprifoliaceae | <i>Lonicera</i>      | <i>Lonicera macranthoides</i>      | HM228531 |
| Eudicotyledons | Caprifoliaceae | <i>Lonicera</i>      | <i>Lonicera macranthoides</i>      | HM228532 |
| Eudicotyledons | Caprifoliaceae | <i>Lonicera</i>      | <i>Lonicera macranthoides</i>      | HM228533 |
| Eudicotyledons | Caprifoliaceae | <i>Lonicera</i>      | <i>Lonicera macranthoides</i>      | HM228534 |
| Eudicotyledons | Caprifoliaceae | <i>Lonicera</i>      | <i>Lonicera macranthoides</i>      | HM228535 |
| Eudicotyledons | Caprifoliaceae | <i>Lonicera</i>      | <i>Lonicera fulvotomentosa</i>     | GQ435472 |
| Eudicotyledons | Caprifoliaceae | <i>Lonicera</i>      | <i>Lonicera fulvotomentosa</i>     | HM228550 |
| Eudicotyledons | Caprifoliaceae | <i>Lonicera</i>      | <i>Lonicera fulvotomentosa</i>     | HM228551 |
| Eudicotyledons | Caprifoliaceae | <i>Lonicera</i>      | <i>Lonicera fulvotomentosa</i>     | HM228552 |
| Eudicotyledons | Gesneriaceae   | <i>Cyrtandra</i>     | <i>Cyrtandra platyphylla</i>       | GQ475154 |
| Eudicotyledons | Gesneriaceae   | <i>Cyrtandra</i>     | <i>Cyrtandra platyphylla</i>       | GQ475156 |
| Eudicotyledons | Ranunculaceae  | <i>Aconitum</i>      | <i>Aconitum coreanum</i>           | GQ337795 |
| Eudicotyledons | Ranunculaceae  | <i>Aconitum</i>      | <i>Aconitum coreanum</i>           | GQ337796 |
| Eudicotyledons | Ranunculaceae  | <i>Aconitum</i>      | <i>Aconitum coreanum</i>           | GQ337797 |
| Eudicotyledons | Ranunculaceae  | <i>Aconitum</i>      | <i>Aconitum coreanum</i>           | GQ337802 |



|                |               |                  |                                 |          |
|----------------|---------------|------------------|---------------------------------|----------|
| Eudicotyledons | Ranunculaceae | <i>Aconitum</i>  | <i>Aconitum coreanum</i>        | GQ337803 |
| Eudicotyledons | Ranunculaceae | <i>Aconitum</i>  | <i>Aconitum coreanum</i>        | GQ337804 |
| Eudicotyledons | Ranunculaceae | <i>Aconitum</i>  | <i>Aconitum coreanum</i>        | GQ337827 |
| Eudicotyledons | Ranunculaceae | <i>Aconitum</i>  | <i>Aconitum coreanum</i>        | GQ337828 |
| Eudicotyledons | Ranunculaceae | <i>Aconitum</i>  | <i>Aconitum coreanum</i>        | GQ337829 |
| Eudicotyledons | Ranunculaceae | <i>Aconitum</i>  | <i>Aconitum coreanum</i>        | GQ337840 |
| Eudicotyledons | Hypericaceae  | <i>Hypericum</i> | <i>Hypericum monogynum</i>      | JN044928 |
| Eudicotyledons | Hypericaceae  | <i>Hypericum</i> | <i>Hypericum monogynum</i>      | JN044929 |
| Eudicotyledons | Fabaceae      | <i>Lespedeza</i> | <i>Lespedeza chinensis</i>      | GU396815 |
| Eudicotyledons | Fabaceae      | <i>Lespedeza</i> | <i>Lespedeza chinensis</i>      | GU572294 |
| Eudicotyledons | Fabaceae      | <i>Lespedeza</i> | <i>Lespedeza davurica</i>       | GU396762 |
| Eudicotyledons | Fabaceae      | <i>Lespedeza</i> | <i>Lespedeza davurica</i>       | GU572297 |
| Eudicotyledons | Primulaceae   | <i>Primula</i>   | <i>Primula aromatica</i>        | JN046469 |
| Eudicotyledons | Primulaceae   | <i>Primula</i>   | <i>Primula aromatica</i>        | JN046470 |
| Eudicotyledons | Primulaceae   | <i>Primula</i>   | <i>Primula bella</i>            | JN046471 |
| Eudicotyledons | Primulaceae   | <i>Primula</i>   | <i>Primula bella</i>            | JN046472 |
| Eudicotyledons | Primulaceae   | <i>Primula</i>   | <i>Primula bella</i>            | JN046473 |
| Eudicotyledons | Primulaceae   | <i>Primula</i>   | <i>Primula blattariformis</i>   | JN046477 |
| Eudicotyledons | Primulaceae   | <i>Primula</i>   | <i>Primula blattariformis</i>   | JN046478 |
| Eudicotyledons | Primulaceae   | <i>Primula</i>   | <i>Primula blattariformis</i>   | JN046479 |
| Eudicotyledons | Primulaceae   | <i>Primula</i>   | <i>Primula blinii</i>           | JN046480 |
| Eudicotyledons | Primulaceae   | <i>Primula</i>   | <i>Primula blinii</i>           | JN046481 |
| Eudicotyledons | Primulaceae   | <i>Primula</i>   | <i>Primula blinii</i>           | JN046482 |
| Eudicotyledons | Primulaceae   | <i>Primula</i>   | <i>Primula blinii</i>           | JN046483 |
| Eudicotyledons | Primulaceae   | <i>Primula</i>   | <i>Primula boreiocalliantha</i> | JN046484 |
| Eudicotyledons | Primulaceae   | <i>Primula</i>   | <i>Primula boreiocalliantha</i> | JN046485 |
| Eudicotyledons | Primulaceae   | <i>Primula</i>   | <i>Primula chapaensis</i>       | JN046493 |
| Eudicotyledons | Primulaceae   | <i>Primula</i>   | <i>Primula chapaensis</i>       | JN046494 |
| Eudicotyledons | Primulaceae   | <i>Primula</i>   | <i>Primula helodoxa</i>         | HM018472 |
| Eudicotyledons | Primulaceae   | <i>Primula</i>   | <i>Primula helodoxa</i>         | HM018473 |
| Eudicotyledons | Primulaceae   | <i>Primula</i>   | <i>Primula helodoxa</i>         | HM018474 |
| Eudicotyledons | Primulaceae   | <i>Primula</i>   | <i>Primula helodoxa</i>         | HM018475 |
| Eudicotyledons | Primulaceae   | <i>Primula</i>   | <i>Primula malvacea</i>         | JN046530 |
| Eudicotyledons | Primulaceae   | <i>Primula</i>   | <i>Primula malvacea</i>         | JN046531 |
| Eudicotyledons | Primulaceae   | <i>Primula</i>   | <i>Primula malvacea</i>         | JN046532 |
| Eudicotyledons | Primulaceae   | <i>Primula</i>   | <i>Primula malvacea</i>         | JN046533 |
| Eudicotyledons | Primulaceae   | <i>Primula</i>   | <i>Primula moupinensis</i>      | JN046538 |
| Eudicotyledons | Primulaceae   | <i>Primula</i>   | <i>Primula moupinensis</i>      | JN046539 |
| Eudicotyledons | Primulaceae   | <i>Primula</i>   | <i>Primula moupinensis</i>      | JN046540 |
| Eudicotyledons | Primulaceae   | <i>Primula</i>   | <i>Primula moupinensis</i>      | JN046541 |
| Eudicotyledons | Primulaceae   | <i>Primula</i>   | <i>Primula moupinensis</i>      | JN046542 |
| Eudicotyledons | Primulaceae   | <i>Primula</i>   | <i>Primula ovalifolia</i>       | HM018512 |
| Eudicotyledons | Primulaceae   | <i>Primula</i>   | <i>Primula ovalifolia</i>       | JN046552 |
| Eudicotyledons | Primulaceae   | <i>Primula</i>   | <i>Primula ovalifolia</i>       | JN046553 |
| Eudicotyledons | Primulaceae   | <i>Primula</i>   | <i>Primula ovalifolia</i>       | JN046554 |
| Eudicotyledons | Primulaceae   | <i>Primula</i>   | <i>Primula ovalifolia</i>       | JN046555 |
| Eudicotyledons | Primulaceae   | <i>Primula</i>   | <i>Primula ovalifolia</i>       | JN046556 |
| Eudicotyledons | Primulaceae   | <i>Primula</i>   | <i>Primula partschiana</i>      | JN046557 |
| Eudicotyledons | Primulaceae   | <i>Primula</i>   | <i>Primula partschiana</i>      | JN046558 |
| Eudicotyledons | Primulaceae   | <i>Primula</i>   | <i>Primula polyneura</i>        | JN046559 |
| Eudicotyledons | Primulaceae   | <i>Primula</i>   | <i>Primula polyneura</i>        | JN046560 |
| Eudicotyledons | Primulaceae   | <i>Primula</i>   | <i>Primula polyneura</i>        | JN046561 |
| Eudicotyledons | Primulaceae   | <i>Primula</i>   | <i>Primula pycnoloba</i>        | JN046569 |

|                |                |                     |                                  |          |
|----------------|----------------|---------------------|----------------------------------|----------|
| Eudicotyledons | Primulaceae    | <i>Primula</i>      | <i>Primula pycnoloba</i>         | JN046570 |
| Eudicotyledons | Primulaceae    | <i>Primula</i>      | <i>Primula pycnoloba</i>         | JN046571 |
| Eudicotyledons | Primulaceae    | <i>Primula</i>      | <i>Primula rugosa</i>            | JN046572 |
| Eudicotyledons | Primulaceae    | <i>Primula</i>      | <i>Primula rugosa</i>            | JN046573 |
| Eudicotyledons | Primulaceae    | <i>Primula</i>      | <i>Primula rugosa</i>            | JN046574 |
| Eudicotyledons | Primulaceae    | <i>Primula</i>      | <i>Primula wangii</i>            | JN046598 |
| Eudicotyledons | Primulaceae    | <i>Primula</i>      | <i>Primula wangii</i>            | JN046599 |
| Eudicotyledons | Apocynaceae    | <i>Alstonia</i>     | <i>Alstonia macrophylla</i>      | GU135391 |
| Eudicotyledons | Apocynaceae    | <i>Alstonia</i>     | <i>Alstonia macrophylla</i>      | GU135392 |
| Eudicotyledons | Apocynaceae    | <i>Alstonia</i>     | <i>Alstonia macrophylla</i>      | GU135394 |
| Eudicotyledons | Rubiaceae      | <i>Hedyotis</i>     | <i>Hedyotis shiuyingiae</i>      | JF699808 |
| Eudicotyledons | Rubiaceae      | <i>Hedyotis</i>     | <i>Hedyotis shiuyingiae</i>      | JF699809 |
| Eudicotyledons | Rubiaceae      | <i>Hedyotis</i>     | <i>Hedyotis shiuyingiae</i>      | JN044783 |
| Eudicotyledons | Rubiaceae      | <i>Hedyotis</i>     | <i>Hedyotis shiuyingiae</i>      | JN044784 |
| Eudicotyledons | Fabaceae       | <i>Dalbergia</i>    | <i>Dalbergia assamica</i>        | FR854143 |
| Eudicotyledons | Fabaceae       | <i>Dalbergia</i>    | <i>Dalbergia assamica</i>        | FR854144 |
| Eudicotyledons | Fabaceae       | <i>Dalbergia</i>    | <i>Dalbergia assamica</i>        | FR854145 |
| Eudicotyledons | Fabaceae       | <i>Dalbergia</i>    | <i>Dalbergia assamica</i>        | FR854146 |
| Eudicotyledons | Fabaceae       | <i>Dalbergia</i>    | <i>Dalbergia assamica</i>        | FR854147 |
| Eudicotyledons | Phyllanthaceae | <i>Phyllanthus</i>  | <i>Phyllanthus indofischeri</i>  | GU598558 |
| Eudicotyledons | Phyllanthaceae | <i>Phyllanthus</i>  | <i>Phyllanthus indofischeri</i>  | GU598559 |
| Eudicotyledons | Phyllanthaceae | <i>Phyllanthus</i>  | <i>Phyllanthus indofischeri</i>  | GU598560 |
| Eudicotyledons | Primulaceae    | <i>Lysimachia</i>   | <i>Lysimachia kalalauensis</i>   | GQ257972 |
| Eudicotyledons | Primulaceae    | <i>Lysimachia</i>   | <i>Lysimachia kalalauensis</i>   | GQ257973 |
| Eudicotyledons | Primulaceae    | <i>Lysimachia</i>   | <i>Lysimachia scopulensis</i>    | GQ257983 |
| Eudicotyledons | Primulaceae    | <i>Lysimachia</i>   | <i>Lysimachia scopulensis</i>    | GQ257984 |
| Eudicotyledons | Phyllanthaceae | <i>Phyllanthus</i>  | <i>Phyllanthus kozhikodianus</i> | GU598570 |
| Eudicotyledons | Phyllanthaceae | <i>Phyllanthus</i>  | <i>Phyllanthus kozhikodianus</i> | GU598571 |
| Eudicotyledons | Phyllanthaceae | <i>Phyllanthus</i>  | <i>Phyllanthus kozhikodianus</i> | GU598572 |
| Eudicotyledons | Phyllanthaceae | <i>Phyllanthus</i>  | <i>Phyllanthus kozhikodianus</i> | GU598578 |
| Eudicotyledons | Phyllanthaceae | <i>Phyllanthus</i>  | <i>Phyllanthus kozhikodianus</i> | GQ409804 |
| Eudicotyledons | Phyllanthaceae | <i>Phyllanthus</i>  | <i>Phyllanthus kozhikodianus</i> | GQ409805 |
| Eudicotyledons | Phyllanthaceae | <i>Phyllanthus</i>  | <i>Phyllanthus kozhikodianus</i> | GQ409806 |
| Eudicotyledons | Phyllanthaceae | <i>Phyllanthus</i>  | <i>Phyllanthus lawii</i>         | GU598556 |
| Eudicotyledons | Phyllanthaceae | <i>Phyllanthus</i>  | <i>Phyllanthus lawii</i>         | GU598557 |
| Eudicotyledons | Phyllanthaceae | <i>Phyllanthus</i>  | <i>Phyllanthus missionis</i>     | GU598553 |
| Eudicotyledons | Phyllanthaceae | <i>Phyllanthus</i>  | <i>Phyllanthus missionis</i>     | GU598554 |
| Eudicotyledons | Phyllanthaceae | <i>Phyllanthus</i>  | <i>Phyllanthus missionis</i>     | GU598555 |
| Eudicotyledons | Phyllanthaceae | <i>Phyllanthus</i>  | <i>Phyllanthus rotundifolius</i> | GU598548 |
| Eudicotyledons | Phyllanthaceae | <i>Phyllanthus</i>  | <i>Phyllanthus rotundifolius</i> | GU598549 |
| Eudicotyledons | Phyllanthaceae | <i>Phyllanthus</i>  | <i>Phyllanthus rotundifolius</i> | GU598550 |
| Eudicotyledons | Phyllanthaceae | <i>Phyllanthus</i>  | <i>Phyllanthus talbotii</i>      | GU598551 |
| Eudicotyledons | Phyllanthaceae | <i>Phyllanthus</i>  | <i>Phyllanthus talbotii</i>      | GU598552 |
| Eudicotyledons | Polygonaceae   | <i>Polygonum</i>    | <i>Polygonum filicaule</i>       | JN046423 |
| Eudicotyledons | Polygonaceae   | <i>Polygonum</i>    | <i>Polygonum filicaule</i>       | JN046424 |
| Eudicotyledons | Gentianaceae   | <i>Gentianopsis</i> | <i>Gentianopsis macrantha</i>    | HM460859 |
| Eudicotyledons | Gentianaceae   | <i>Gentianopsis</i> | <i>Gentianopsis macrantha</i>    | HM460860 |
| Eudicotyledons | Gentianaceae   | <i>Gentianopsis</i> | <i>Gentianopsis macrantha</i>    | HM460861 |
| Eudicotyledons | Gentianaceae   | <i>Gentianopsis</i> | <i>Gentianopsis thermalis</i>    | HM460862 |
| Eudicotyledons | Gentianaceae   | <i>Gentianopsis</i> | <i>Gentianopsis thermalis</i>    | HM460863 |
| Eudicotyledons | Gentianaceae   | <i>Gentianopsis</i> | <i>Gentianopsis thermalis</i>    | HM460864 |
| Eudicotyledons | Hamamelidaceae | <i>Loropetalum</i>  | <i>Loropetalum subcordatum</i>   | JN542799 |
| Eudicotyledons | Hamamelidaceae | <i>Loropetalum</i>  | <i>Loropetalum subcordatum</i>   | JN542800 |

|                |                |                    |                                |          |
|----------------|----------------|--------------------|--------------------------------|----------|
| Eudicotyledons | Hamamelidaceae | <i>Loropetalum</i> | <i>Loropetalum subcordatum</i> | HM369153 |
| Eudicotyledons | Hamamelidaceae | <i>Loropetalum</i> | <i>Loropetalum subcordatum</i> | HM369154 |
| Eudicotyledons | Araliaceae     | <i>Dendropanax</i> | <i>Dendropanax dentiger</i>    | HQ427094 |
| Eudicotyledons | Araliaceae     | <i>Dendropanax</i> | <i>Dendropanax dentiger</i>    | GU054804 |
| Eudicotyledons | Araliaceae     | <i>Dendropanax</i> | <i>Dendropanax dentiger</i>    | GU054808 |
| Eudicotyledons | Araliaceae     | <i>Dendropanax</i> | <i>Dendropanax dentiger</i>    | GU054844 |
| Eudicotyledons | Araliaceae     | <i>Dendropanax</i> | <i>Dendropanax dentiger</i>    | GU054884 |
| Eudicotyledons | Araliaceae     | <i>Dendropanax</i> | <i>Dendropanax caucanus</i>    | GU054820 |
| Eudicotyledons | Araliaceae     | <i>Dendropanax</i> | <i>Dendropanax caucanus</i>    | GU054821 |
| Eudicotyledons | Araliaceae     | <i>Dendropanax</i> | <i>Dendropanax gonatopodus</i> | GU054822 |
| Eudicotyledons | Araliaceae     | <i>Dendropanax</i> | <i>Dendropanax gonatopodus</i> | GU054871 |
| Eudicotyledons | Araliaceae     | <i>Dendropanax</i> | <i>Dendropanax gonatopodus</i> | GU054880 |
| Eudicotyledons | Araliaceae     | <i>Dendropanax</i> | <i>Dendropanax oliganthus</i>  | GU054824 |
| Eudicotyledons | Araliaceae     | <i>Dendropanax</i> | <i>Dendropanax oliganthus</i>  | GU054863 |
| Eudicotyledons | Araliaceae     | <i>Dendropanax</i> | <i>Dendropanax praestans</i>   | GU054847 |
| Eudicotyledons | Araliaceae     | <i>Dendropanax</i> | <i>Dendropanax praestans</i>   | GU054849 |
| Eudicotyledons | Araliaceae     | <i>Dendropanax</i> | <i>Dendropanax bolivianus</i>  | GU054861 |
| Eudicotyledons | Araliaceae     | <i>Dendropanax</i> | <i>Dendropanax bolivianus</i>  | GU054862 |
| Eudicotyledons | Araliaceae     | <i>Dendropanax</i> | <i>Dendropanax cuneatus</i>    | GU054864 |
| Eudicotyledons | Araliaceae     | <i>Dendropanax</i> | <i>Dendropanax cuneatus</i>    | GU054870 |
| Eudicotyledons | Araliaceae     | <i>Dendropanax</i> | <i>Dendropanax poilanei</i>    | GU054866 |
| Eudicotyledons | Araliaceae     | <i>Dendropanax</i> | <i>Dendropanax poilanei</i>    | GU054867 |
| Eudicotyledons | Araliaceae     | <i>Dendropanax</i> | <i>Dendropanax oligodontus</i> | GU054879 |
| Eudicotyledons | Araliaceae     | <i>Dendropanax</i> | <i>Dendropanax oligodontus</i> | GU054885 |
| Eudicotyledons | Araliaceae     | <i>Dendropanax</i> | <i>Dendropanax palustris</i>   | GU054842 |
| Eudicotyledons | Araliaceae     | <i>Dendropanax</i> | <i>Dendropanax palustris</i>   | GU054848 |
| Eudicotyledons | Lamiaceae      | <i>Thymus</i>      | <i>Thymus sp. MIB zpl</i>      | FR726151 |
| Eudicotyledons | Lamiaceae      | <i>Thymus</i>      | <i>Thymus sp. MIB zpl</i>      | FR726152 |
| Eudicotyledons | Lamiaceae      | <i>Thymus</i>      | <i>Thymus sp. MIB zpl</i>      | FR726153 |
| Eudicotyledons | Asteraceae     | <i>Soroseris</i>   | <i>Soroseris gillii</i>        | HQ436181 |
| Eudicotyledons | Asteraceae     | <i>Soroseris</i>   | <i>Soroseris gillii</i>        | JN047245 |
| Eudicotyledons | Asteraceae     | <i>Soroseris</i>   | <i>Soroseris gillii</i>        | JN047246 |
| Eudicotyledons | Theaceae       | <i>Stewartia</i>   | <i>Stewartia cordifolia</i>    | HM100516 |
| Eudicotyledons | Theaceae       | <i>Stewartia</i>   | <i>Stewartia cordifolia</i>    | HM100517 |
| Eudicotyledons | Theaceae       | <i>Stewartia</i>   | <i>Stewartia laotica</i>       | HM100519 |
| Eudicotyledons | Theaceae       | <i>Stewartia</i>   | <i>Stewartia laotica</i>       | HM100520 |
| Eudicotyledons | Theaceae       | <i>Stewartia</i>   | <i>Stewartia micrantha</i>     | HM100521 |
| Eudicotyledons | Theaceae       | <i>Stewartia</i>   | <i>Stewartia micrantha</i>     | HM100522 |
| Eudicotyledons | Theaceae       | <i>Stewartia</i>   | <i>Stewartia obovata</i>       | HM100524 |
| Eudicotyledons | Theaceae       | <i>Stewartia</i>   | <i>Stewartia obovata</i>       | HM100525 |
| Eudicotyledons | Theaceae       | <i>Stewartia</i>   | <i>Stewartia sichuanensis</i>  | HM100526 |
| Eudicotyledons | Theaceae       | <i>Stewartia</i>   | <i>Stewartia sichuanensis</i>  | HM100527 |
| Eudicotyledons | Theaceae       | <i>Stewartia</i>   | <i>Stewartia sinii</i>         | HM100530 |
| Eudicotyledons | Theaceae       | <i>Stewartia</i>   | <i>Stewartia sinii</i>         | HM100531 |
| Eudicotyledons | Theaceae       | <i>Stewartia</i>   | <i>Stewartia tonkinensis</i>   | HM100532 |
| Eudicotyledons | Theaceae       | <i>Stewartia</i>   | <i>Stewartia tonkinensis</i>   | HM100533 |
| Eudicotyledons | Theaceae       | <i>Stewartia</i>   | <i>Stewartia rubiginosa</i>    | HM100565 |
| Eudicotyledons | Theaceae       | <i>Stewartia</i>   | <i>Stewartia rubiginosa</i>    | HM100580 |
| Eudicotyledons | Theaceae       | <i>Stewartia</i>   | <i>Stewartia rubiginosa</i>    | HM100581 |
| Eudicotyledons | Theaceae       | <i>Stewartia</i>   | <i>Stewartia rubiginosa</i>    | HM100582 |
| Eudicotyledons | Fabaceae       | <i>Senna</i>       | <i>Senna sulfurea</i>          | JF838361 |
| Eudicotyledons | Fabaceae       | <i>Senna</i>       | <i>Senna sulfurea</i>          | HQ161758 |
| Eudicotyledons | Fabaceae       | <i>Senna</i>       | <i>Senna sophera</i>           | JF838363 |

|                |                |                    |                                  |          |
|----------------|----------------|--------------------|----------------------------------|----------|
| Eudicotyledons | Fabaceae       | <i>Senna</i>       | <i>Senna sophera</i>             | HQ161760 |
| Eudicotyledons | Asteraceae     | <i>Solidago</i>    | <i>Solidago houghtonii</i>       | HQ142563 |
| Eudicotyledons | Asteraceae     | <i>Solidago</i>    | <i>Solidago houghtonii</i>       | HQ142564 |
| Eudicotyledons | Asteraceae     | <i>Solidago</i>    | <i>Solidago houghtonii</i>       | HQ142565 |
| Eudicotyledons | Asteraceae     | <i>Solidago</i>    | <i>Solidago houghtonii</i>       | HQ142566 |
| Eudicotyledons | Asteraceae     | <i>Soroseris</i>   | <i>Soroseris erysimoides</i>     | HQ436179 |
| Eudicotyledons | Asteraceae     | <i>Soroseris</i>   | <i>Soroseris erysimoides</i>     | HQ436180 |
| Eudicotyledons | Asteraceae     | <i>Soroseris</i>   | <i>Soroseris erysimoides</i>     | JN047243 |
| Eudicotyledons | Asteraceae     | <i>Soroseris</i>   | <i>Soroseris erysimoides</i>     | JN047244 |
| Eudicotyledons | Asteraceae     | <i>Soroseris</i>   | <i>Soroseris hirsuta</i>         | HQ436185 |
| Eudicotyledons | Asteraceae     | <i>Soroseris</i>   | <i>Soroseris hirsuta</i>         | HQ436186 |
| Eudicotyledons | Asteraceae     | <i>Soroseris</i>   | <i>Soroseris hirsuta</i>         | JN047249 |
| Eudicotyledons | Asteraceae     | <i>Soroseris</i>   | <i>Soroseris hirsuta</i>         | JN047250 |
| Eudicotyledons | Fabaceae       | <i>Dalbergia</i>   | <i>Dalbergia oliveri</i>         | FR854153 |
| Eudicotyledons | Fabaceae       | <i>Dalbergia</i>   | <i>Dalbergia oliveri</i>         | FR854154 |
| Eudicotyledons | Fabaceae       | <i>Dalbergia</i>   | <i>Dalbergia oliveri</i>         | FR854155 |
| Eudicotyledons | Fabaceae       | <i>Dalbergia</i>   | <i>Dalbergia oliveri</i>         | FR854156 |
| Eudicotyledons | Fabaceae       | <i>Dalbergia</i>   | <i>Dalbergia oliveri</i>         | FR854157 |
| Eudicotyledons | Rubiaceae      | <i>Hedyotis</i>    | <i>Hedyotis pterita</i>          | JF699797 |
| Eudicotyledons | Rubiaceae      | <i>Hedyotis</i>    | <i>Hedyotis pterita</i>          | JF699798 |
| Eudicotyledons | Rubiaceae      | <i>Hedyotis</i>    | <i>Hedyotis pterita</i>          | JF699799 |
| Eudicotyledons | Rubiaceae      | <i>Hedyotis</i>    | <i>Hedyotis pterita</i>          | JF699800 |
| Eudicotyledons | Hypericaceae   | <i>Hypericum</i>   | <i>Hypericum przewalskii</i>     | JN044930 |
| Eudicotyledons | Hypericaceae   | <i>Hypericum</i>   | <i>Hypericum przewalskii</i>     | JN044931 |
| Eudicotyledons | Hypericaceae   | <i>Hypericum</i>   | <i>Hypericum przewalskii</i>     | JN044932 |
| Eudicotyledons | Rubiaceae      | <i>Leptodermis</i> | <i>Leptodermis buxifolia</i>     | JN045149 |
| Eudicotyledons | Rubiaceae      | <i>Leptodermis</i> | <i>Leptodermis buxifolia</i>     | JN045150 |
| Eudicotyledons | Rubiaceae      | <i>Leptodermis</i> | <i>Leptodermis hirsutiflora</i>  | JN045153 |
| Eudicotyledons | Rubiaceae      | <i>Leptodermis</i> | <i>Leptodermis hirsutiflora</i>  | JN045154 |
| Eudicotyledons | Rubiaceae      | <i>Leptodermis</i> | <i>Leptodermis ovata</i>         | JN045155 |
| Eudicotyledons | Rubiaceae      | <i>Leptodermis</i> | <i>Leptodermis ovata</i>         | JN045156 |
| Eudicotyledons | Rubiaceae      | <i>Leptodermis</i> | <i>Leptodermis pilosa</i>        | JN045157 |
| Eudicotyledons | Rubiaceae      | <i>Leptodermis</i> | <i>Leptodermis pilosa</i>        | JN045158 |
| Eudicotyledons | Rubiaceae      | <i>Leptodermis</i> | <i>Leptodermis pilosa</i>        | JN045159 |
| Eudicotyledons | Rubiaceae      | <i>Leptodermis</i> | <i>Leptodermis scabrida</i>      | JN045170 |
| Eudicotyledons | Rubiaceae      | <i>Leptodermis</i> | <i>Leptodermis scabrida</i>      | JN045171 |
| Eudicotyledons | Rubiaceae      | <i>Leptodermis</i> | <i>Leptodermis scabrida</i>      | JN045172 |
| Eudicotyledons | Rubiaceae      | <i>Leptodermis</i> | <i>Leptodermis scabrida</i>      | JN045173 |
| Eudicotyledons | Rubiaceae      | <i>Leptodermis</i> | <i>Leptodermis ludlowii</i>      | JN045174 |
| Eudicotyledons | Rubiaceae      | <i>Leptodermis</i> | <i>Leptodermis ludlowii</i>      | JN045175 |
| Eudicotyledons | Rubiaceae      | <i>Leptodermis</i> | <i>Leptodermis vestita</i>       | JN045178 |
| Eudicotyledons | Rubiaceae      | <i>Leptodermis</i> | <i>Leptodermis vestita</i>       | JN045179 |
| Eudicotyledons | Caprifoliaceae | <i>Lonicera</i>    | <i>Lonicera webbiana</i>         | JN045264 |
| Eudicotyledons | Caprifoliaceae | <i>Lonicera</i>    | <i>Lonicera webbiana</i>         | JN045265 |
| Eudicotyledons | Caprifoliaceae | <i>Lonicera</i>    | <i>Lonicera webbiana</i>         | JN045266 |
| Eudicotyledons | Primulaceae    | <i>Lysimachia</i>  | <i>Lysimachia chapaensis</i>     | JN045297 |
| Eudicotyledons | Primulaceae    | <i>Lysimachia</i>  | <i>Lysimachia chapaensis</i>     | JN045298 |
| Eudicotyledons | Primulaceae    | <i>Lysimachia</i>  | <i>Lysimachia chekiangensis</i>  | JN045299 |
| Eudicotyledons | Primulaceae    | <i>Lysimachia</i>  | <i>Lysimachia chekiangensis</i>  | JN045300 |
| Eudicotyledons | Primulaceae    | <i>Lysimachia</i>  | <i>Lysimachia dextrorsiflora</i> | JN045323 |
| Eudicotyledons | Primulaceae    | <i>Lysimachia</i>  | <i>Lysimachia dextrorsiflora</i> | JN045324 |
| Eudicotyledons | Primulaceae    | <i>Lysimachia</i>  | <i>Lysimachia erosipetala</i>    | JN045325 |
| Eudicotyledons | Primulaceae    | <i>Lysimachia</i>  | <i>Lysimachia erosipetala</i>    | JN045326 |

|                |             |                      |                                |          |
|----------------|-------------|----------------------|--------------------------------|----------|
| Eudicotyledons | Primulaceae | <i>Lysimachia</i>    | <i>Lysimachia gesnerioides</i> | JN045338 |
| Eudicotyledons | Primulaceae | <i>Lysimachia</i>    | <i>Lysimachia gesnerioides</i> | JN045339 |
| Eudicotyledons | Primulaceae | <i>Lysimachia</i>    | <i>Lysimachia hemsleyana</i>   | JN045342 |
| Eudicotyledons | Primulaceae | <i>Lysimachia</i>    | <i>Lysimachia hemsleyana</i>   | JN045343 |
| Eudicotyledons | Primulaceae | <i>Lysimachia</i>    | <i>Lysimachia hemsleyana</i>   | JN045344 |
| Eudicotyledons | Primulaceae | <i>Lysimachia</i>    | <i>Lysimachia hemsleyana</i>   | JN045345 |
| Eudicotyledons | Primulaceae | <i>Lysimachia</i>    | <i>Lysimachia hemsleyana</i>   | JN045346 |
| Eudicotyledons | Primulaceae | <i>Lysimachia</i>    | <i>Lysimachia hemsleyi</i>     | JN045347 |
| Eudicotyledons | Primulaceae | <i>Lysimachia</i>    | <i>Lysimachia hemsleyi</i>     | JN045348 |
| Eudicotyledons | Primulaceae | <i>Lysimachia</i>    | <i>Lysimachia hemsleyi</i>     | JN045349 |
| Eudicotyledons | Primulaceae | <i>Lysimachia</i>    | <i>Lysimachia hemsleyi</i>     | JN045350 |
| Eudicotyledons | Primulaceae | <i>Lysimachia</i>    | <i>Lysimachia heterobotrys</i> | JN045351 |
| Eudicotyledons | Primulaceae | <i>Lysimachia</i>    | <i>Lysimachia heterobotrys</i> | JN045352 |
| Eudicotyledons | Primulaceae | <i>Lysimachia</i>    | <i>Lysimachia klattiana</i>    | JN045362 |
| Eudicotyledons | Primulaceae | <i>Lysimachia</i>    | <i>Lysimachia klattiana</i>    | JN045363 |
| Eudicotyledons | Primulaceae | <i>Lysimachia</i>    | <i>Lysimachia patungensis</i>  | JN045380 |
| Eudicotyledons | Primulaceae | <i>Lysimachia</i>    | <i>Lysimachia patungensis</i>  | JN045381 |
| Eudicotyledons | Primulaceae | <i>Lysimachia</i>    | <i>Lysimachia patungensis</i>  | JN045382 |
| Eudicotyledons | Primulaceae | <i>Lysimachia</i>    | <i>Lysimachia patungensis</i>  | JN045383 |
| Eudicotyledons | Primulaceae | <i>Lysimachia</i>    | <i>Lysimachia pentapetala</i>  | JN045384 |
| Eudicotyledons | Primulaceae | <i>Lysimachia</i>    | <i>Lysimachia pentapetala</i>  | JN045385 |
| Eudicotyledons | Apiaceae    | <i>Peucedanum</i>    | <i>Peucedanum ampliatum</i>    | JN046213 |
| Eudicotyledons | Apiaceae    | <i>Peucedanum</i>    | <i>Peucedanum ampliatum</i>    | JN046214 |
| Eudicotyledons | Apiaceae    | <i>Peucedanum</i>    | <i>Peucedanum ampliatum</i>    | JN046215 |
| Eudicotyledons | Apiaceae    | <i>Peucedanum</i>    | <i>Peucedanum caespitosum</i>  | JN046216 |
| Eudicotyledons | Apiaceae    | <i>Peucedanum</i>    | <i>Peucedanum caespitosum</i>  | JN046217 |
| Eudicotyledons | Apiaceae    | <i>Peucedanum</i>    | <i>Peucedanum caespitosum</i>  | JN046218 |
| Eudicotyledons | Apiaceae    | <i>Peucedanum</i>    | <i>Peucedanum medicum</i>      | JN046225 |
| Eudicotyledons | Apiaceae    | <i>Peucedanum</i>    | <i>Peucedanum medicum</i>      | JN046226 |
| Eudicotyledons | Apiaceae    | <i>Peucedanum</i>    | <i>Peucedanum medicum</i>      | JN046227 |
| Eudicotyledons | Apiaceae    | <i>Peucedanum</i>    | <i>Peucedanum medicum</i>      | JN046228 |
| Eudicotyledons | Apiaceae    | <i>Peucedanum</i>    | <i>Peucedanum wawrae</i>       | JN046236 |
| Eudicotyledons | Apiaceae    | <i>Peucedanum</i>    | <i>Peucedanum wawrae</i>       | JN046237 |
| Eudicotyledons | Apiaceae    | <i>Peucedanum</i>    | <i>Peucedanum wawrae</i>       | JN046238 |
| Eudicotyledons | Apiaceae    | <i>Pleurospermum</i> | <i>Pleurospermum cristatum</i> | JN046385 |
| Eudicotyledons | Apiaceae    | <i>Pleurospermum</i> | <i>Pleurospermum cristatum</i> | JN046386 |
| Eudicotyledons | Apiaceae    | <i>Pleurospermum</i> | <i>Pleurospermum giraldii</i>  | JN046389 |
| Eudicotyledons | Apiaceae    | <i>Pleurospermum</i> | <i>Pleurospermum giraldii</i>  | JN046390 |
| Eudicotyledons | Apiaceae    | <i>Pleurospermum</i> | <i>Pleurospermum giraldii</i>  | JN046391 |
| Eudicotyledons | Apiaceae    | <i>Pleurospermum</i> | <i>Pleurospermum giraldii</i>  | JN046392 |
| Eudicotyledons | Primulaceae | <i>Primula</i>       | <i>Primula agleniana</i>       | JN046458 |
| Eudicotyledons | Primulaceae | <i>Primula</i>       | <i>Primula agleniana</i>       | JN046459 |
| Eudicotyledons | Primulaceae | <i>Primula</i>       | <i>Primula agleniana</i>       | JN046460 |
| Eudicotyledons | Primulaceae | <i>Primula</i>       | <i>Primula diantha</i>         | JN046508 |
| Eudicotyledons | Primulaceae | <i>Primula</i>       | <i>Primula diantha</i>         | JN046509 |
| Eudicotyledons | Primulaceae | <i>Primula</i>       | <i>Primula diantha</i>         | JN046510 |
| Eudicotyledons | Primulaceae | <i>Primula</i>       | <i>Primula diantha</i>         | JN046511 |
| Eudicotyledons | Primulaceae | <i>Primula</i>       | <i>Primula duclouxii</i>       | JN046512 |
| Eudicotyledons | Primulaceae | <i>Primula</i>       | <i>Primula duclouxii</i>       | JN046513 |
| Eudicotyledons | Primulaceae | <i>Primula</i>       | <i>Primula epilosa</i>         | JN046514 |
| Eudicotyledons | Primulaceae | <i>Primula</i>       | <i>Primula epilosa</i>         | JN046515 |
| Eudicotyledons | Primulaceae | <i>Primula</i>       | <i>Primula epilosa</i>         | JN046516 |
| Eudicotyledons | Primulaceae | <i>Primula</i>       | <i>Primula kialensis</i>       | JN046528 |

|                |               |                   |                                     |          |
|----------------|---------------|-------------------|-------------------------------------|----------|
| Eudicotyledons | Primulaceae   | <i>Primula</i>    | <i>Primula kialensis</i>            | JN046529 |
| Eudicotyledons | Primulaceae   | <i>Primula</i>    | <i>Primula melanops</i>             | JN046534 |
| Eudicotyledons | Primulaceae   | <i>Primula</i>    | <i>Primula melanops</i>             | JN046535 |
| Eudicotyledons | Primulaceae   | <i>Primula</i>    | <i>Primula munroi</i>               | JN046543 |
| Eudicotyledons | Primulaceae   | <i>Primula</i>    | <i>Primula munroi</i>               | JN046544 |
| Eudicotyledons | Primulaceae   | <i>Primula</i>    | <i>Primula munroi</i>               | JN046545 |
| Eudicotyledons | Primulaceae   | <i>Primula</i>    | <i>Primula munroi</i>               | JN046546 |
| Eudicotyledons | Primulaceae   | <i>Primula</i>    | <i>Primula oreodoxa</i>             | JN046550 |
| Eudicotyledons | Primulaceae   | <i>Primula</i>    | <i>Primula oreodoxa</i>             | JN046551 |
| Eudicotyledons | Primulaceae   | <i>Primula</i>    | <i>Primula prattii</i>              | JN046562 |
| Eudicotyledons | Primulaceae   | <i>Primula</i>    | <i>Primula prattii</i>              | JN046563 |
| Eudicotyledons | Primulaceae   | <i>Primula</i>    | <i>Primula spicata</i>              | JN046590 |
| Eudicotyledons | Primulaceae   | <i>Primula</i>    | <i>Primula spicata</i>              | JN046591 |
| Eudicotyledons | Primulaceae   | <i>Primula</i>    | <i>Primula szechuanica</i>          | JN046592 |
| Eudicotyledons | Primulaceae   | <i>Primula</i>    | <i>Primula szechuanica</i>          | JN046593 |
| Eudicotyledons | Primulaceae   | <i>Primula</i>    | <i>Primula tardiflora</i>           | JN046594 |
| Eudicotyledons | Primulaceae   | <i>Primula</i>    | <i>Primula tardiflora</i>           | JN046595 |
| Eudicotyledons | Primulaceae   | <i>Primula</i>    | <i>Primula virginis</i>             | JN046596 |
| Eudicotyledons | Primulaceae   | <i>Primula</i>    | <i>Primula virginis</i>             | JN046597 |
| Eudicotyledons | Ranunculaceae | <i>Aconitum</i>   | <i>Aconitum angustius</i>           | JN043736 |
| Eudicotyledons | Ranunculaceae | <i>Aconitum</i>   | <i>Aconitum angustius</i>           | JN043737 |
| Eudicotyledons | Ranunculaceae | <i>Aconitum</i>   | <i>Aconitum angustius</i>           | JN043738 |
| Eudicotyledons | Ranunculaceae | <i>Aconitum</i>   | <i>Aconitum angustius</i>           | JN043739 |
| Eudicotyledons | Ranunculaceae | <i>Aconitum</i>   | <i>Aconitum angustius</i>           | JN043740 |
| Eudicotyledons | Ranunculaceae | <i>Aconitum</i>   | <i>Aconitum angustius</i>           | JN043741 |
| Eudicotyledons | Ranunculaceae | <i>Aconitum</i>   | <i>Aconitum angustius</i>           | JN043742 |
| Eudicotyledons | Ranunculaceae | <i>Aconitum</i>   | <i>Aconitum angustius</i>           | JN043743 |
| Eudicotyledons | Ranunculaceae | <i>Aconitum</i>   | <i>Aconitum angustius</i>           | JN043744 |
| Eudicotyledons | Ranunculaceae | <i>Aconitum</i>   | <i>Aconitum angustius</i>           | JN043745 |
| Eudicotyledons | Ranunculaceae | <i>Aconitum</i>   | <i>Aconitum angustius</i>           | JN043746 |
| Eudicotyledons | Ranunculaceae | <i>Aconitum</i>   | <i>Aconitum barbatum</i>            | JN043747 |
| Eudicotyledons | Ranunculaceae | <i>Aconitum</i>   | <i>Aconitum barbatum</i>            | JN043748 |
| Eudicotyledons | Ranunculaceae | <i>Aconitum</i>   | <i>Aconitum barbatum</i>            | JN043749 |
| Eudicotyledons | Ranunculaceae | <i>Aconitum</i>   | <i>Aconitum barbatum</i>            | JN043750 |
| Eudicotyledons | Ranunculaceae | <i>Aconitum</i>   | <i>Aconitum barbatum</i>            | JN043751 |
| Eudicotyledons | Ranunculaceae | <i>Aconitum</i>   | <i>Aconitum barbatum</i>            | JN043752 |
| Eudicotyledons | Ranunculaceae | <i>Aconitum</i>   | <i>Aconitum longecassidatum</i>     | JN043756 |
| Eudicotyledons | Ranunculaceae | <i>Aconitum</i>   | <i>Aconitum longecassidatum</i>     | JN043757 |
| Eudicotyledons | Ranunculaceae | <i>Aconitum</i>   | <i>Aconitum longecassidatum</i>     | JN043758 |
| Eudicotyledons | Ranunculaceae | <i>Aconitum</i>   | <i>Aconitum longecassidatum</i>     | JN043759 |
| Eudicotyledons | Ranunculaceae | <i>Aconitum</i>   | <i>Aconitum longecassidatum</i>     | JN043760 |
| Eudicotyledons | Ranunculaceae | <i>Aconitum</i>   | <i>Aconitum longecassidatum</i>     | JN043761 |
| Eudicotyledons | Ranunculaceae | <i>Aconitum</i>   | <i>Aconitum longecassidatum</i>     | JN043762 |
| Eudicotyledons | Ranunculaceae | <i>Aconitum</i>   | <i>Aconitum monticola</i>           | JN043763 |
| Eudicotyledons | Ranunculaceae | <i>Aconitum</i>   | <i>Aconitum monticola</i>           | JN043764 |
| Eudicotyledons | Ranunculaceae | <i>Aconitum</i>   | <i>Aconitum monticola</i>           | JN043765 |
| Eudicotyledons | Ranunculaceae | <i>Delphinium</i> | <i>Delphinium batangense</i>        | JN044396 |
| Eudicotyledons | Ranunculaceae | <i>Delphinium</i> | <i>Delphinium batangense</i>        | JN044397 |
| Eudicotyledons | Ranunculaceae | <i>Delphinium</i> | <i>Delphinium beesianum</i>         | JN044398 |
| Eudicotyledons | Ranunculaceae | <i>Delphinium</i> | <i>Delphinium beesianum</i>         | JN044399 |
| Eudicotyledons | Ranunculaceae | <i>Delphinium</i> | <i>Delphinium ceratophorum</i>      | JN044400 |
| Eudicotyledons | Ranunculaceae | <i>Delphinium</i> | <i>Delphinium ceratophorum</i>      | JN044401 |
| Eudicotyledons | Ranunculaceae | <i>Delphinium</i> | <i>Delphinium dolichocentroides</i> | JN044404 |

|                |               |                   |                                     |          |
|----------------|---------------|-------------------|-------------------------------------|----------|
| Eudicotyledons | Ranunculaceae | <i>Delphinium</i> | <i>Delphinium dolichocentroides</i> | JN044405 |
| Eudicotyledons | Ranunculaceae | <i>Delphinium</i> | <i>Delphinium kamaonense</i>        | JN044409 |
| Eudicotyledons | Ranunculaceae | <i>Delphinium</i> | <i>Delphinium kamaonense</i>        | JN044410 |
| Eudicotyledons | Ranunculaceae | <i>Delphinium</i> | <i>Delphinium muliense</i>          | JN044411 |
| Eudicotyledons | Ranunculaceae | <i>Delphinium</i> | <i>Delphinium muliense</i>          | JN044412 |
| Eudicotyledons | Ranunculaceae | <i>Delphinium</i> | <i>Delphinium omeiense</i>          | JN044413 |
| Eudicotyledons | Ranunculaceae | <i>Delphinium</i> | <i>Delphinium omeiense</i>          | JN044414 |
| Eudicotyledons | Ranunculaceae | <i>Delphinium</i> | <i>Delphinium omeiense</i>          | JN044415 |
| Eudicotyledons | Ranunculaceae | <i>Delphinium</i> | <i>Delphinium omeiense</i>          | JN044416 |
| Eudicotyledons | Ranunculaceae | <i>Delphinium</i> | <i>Delphinium omeiense</i>          | JN044417 |
| Eudicotyledons | Ranunculaceae | <i>Delphinium</i> | <i>Delphinium pseudohamatum</i>     | JN044420 |
| Eudicotyledons | Ranunculaceae | <i>Delphinium</i> | <i>Delphinium pseudohamatum</i>     | JN044421 |
| Eudicotyledons | Ranunculaceae | <i>Delphinium</i> | <i>Delphinium pycnocentrum</i>      | JN044422 |
| Eudicotyledons | Ranunculaceae | <i>Delphinium</i> | <i>Delphinium pycnocentrum</i>      | JN044423 |
| Eudicotyledons | Ranunculaceae | <i>Delphinium</i> | <i>Delphinium smithianum</i>        | JN044424 |
| Eudicotyledons | Ranunculaceae | <i>Delphinium</i> | <i>Delphinium smithianum</i>        | JN044425 |
| Eudicotyledons | Ranunculaceae | <i>Delphinium</i> | <i>Delphinium spirocentrum</i>      | JN044426 |
| Eudicotyledons | Ranunculaceae | <i>Delphinium</i> | <i>Delphinium spirocentrum</i>      | JN044427 |
| Eudicotyledons | Ranunculaceae | <i>Delphinium</i> | <i>Delphinium taliense</i>          | JN044428 |
| Eudicotyledons | Ranunculaceae | <i>Delphinium</i> | <i>Delphinium taliense</i>          | JN044429 |
| Eudicotyledons | Ranunculaceae | <i>Delphinium</i> | <i>Delphinium taliense</i>          | JN044430 |
| Eudicotyledons | Ranunculaceae | <i>Delphinium</i> | <i>Delphinium taliense</i>          | JN044431 |
| Eudicotyledons | Ranunculaceae | <i>Delphinium</i> | <i>Delphinium tatsienense</i>       | JN044432 |
| Eudicotyledons | Ranunculaceae | <i>Delphinium</i> | <i>Delphinium tatsienense</i>       | JN044433 |
| Eudicotyledons | Ranunculaceae | <i>Delphinium</i> | <i>Delphinium tatsienense</i>       | JN044434 |
| Eudicotyledons | Ranunculaceae | <i>Delphinium</i> | <i>Delphinium tatsienense</i>       | JN044435 |
| Eudicotyledons | Ranunculaceae | <i>Delphinium</i> | <i>Delphinium tatsienense</i>       | JN044436 |
| Eudicotyledons | Ranunculaceae | <i>Delphinium</i> | <i>Delphinium tatsienense</i>       | JN044437 |
| Eudicotyledons | Ranunculaceae | <i>Delphinium</i> | <i>Delphinium thibeticum</i>        | JN044438 |
| Eudicotyledons | Ranunculaceae | <i>Delphinium</i> | <i>Delphinium thibeticum</i>        | JN044439 |
| Eudicotyledons | Ranunculaceae | <i>Delphinium</i> | <i>Delphinium thibeticum</i>        | JN044440 |
| Eudicotyledons | Ranunculaceae | <i>Delphinium</i> | <i>Delphinium tongolense</i>        | JN044441 |
| Eudicotyledons | Ranunculaceae | <i>Delphinium</i> | <i>Delphinium tongolense</i>        | JN044442 |
| Eudicotyledons | Ranunculaceae | <i>Delphinium</i> | <i>Delphinium trichophorum</i>      | JN044443 |
| Eudicotyledons | Ranunculaceae | <i>Delphinium</i> | <i>Delphinium trichophorum</i>      | JN044444 |
| Eudicotyledons | Rubiaceae     | <i>Hedyotis</i>   | <i>Hedyotis cantoniensis</i>        | JF699773 |
| Eudicotyledons | Rubiaceae     | <i>Hedyotis</i>   | <i>Hedyotis cantoniensis</i>        | JF699774 |
| Eudicotyledons | Rubiaceae     | <i>Hedyotis</i>   | <i>Hedyotis cantoniensis</i>        | JF699775 |
| Eudicotyledons | Rubiaceae     | <i>Hedyotis</i>   | <i>Hedyotis cantoniensis</i>        | JN044763 |
| Eudicotyledons | Rubiaceae     | <i>Hedyotis</i>   | <i>Hedyotis cantoniensis</i>        | JN044764 |
| Eudicotyledons | Rubiaceae     | <i>Hedyotis</i>   | <i>Hedyotis caudatifolia</i>        | JF699776 |
| Eudicotyledons | Rubiaceae     | <i>Hedyotis</i>   | <i>Hedyotis caudatifolia</i>        | JF699777 |
| Eudicotyledons | Rubiaceae     | <i>Hedyotis</i>   | <i>Hedyotis caudatifolia</i>        | JN044765 |
| Eudicotyledons | Rubiaceae     | <i>Hedyotis</i>   | <i>Hedyotis caudatifolia</i>        | JN044766 |
| Eudicotyledons | Rubiaceae     | <i>Hedyotis</i>   | <i>Hedyotis pulcherrima</i>         | JF699801 |
| Eudicotyledons | Rubiaceae     | <i>Hedyotis</i>   | <i>Hedyotis pulcherrima</i>         | JF699802 |
| Eudicotyledons | Rubiaceae     | <i>Hedyotis</i>   | <i>Hedyotis pulcherrima</i>         | JF699803 |
| Eudicotyledons | Rubiaceae     | <i>Hedyotis</i>   | <i>Hedyotis pulcherrima</i>         | JN044779 |
| Eudicotyledons | Rubiaceae     | <i>Hedyotis</i>   | <i>Hedyotis pulcherrima</i>         | JN044780 |
| Eudicotyledons | Rubiaceae     | <i>Hedyotis</i>   | <i>Hedyotis shenzhenensis</i>       | JF699805 |
| Eudicotyledons | Rubiaceae     | <i>Hedyotis</i>   | <i>Hedyotis shenzhenensis</i>       | JF699806 |
| Eudicotyledons | Rubiaceae     | <i>Hedyotis</i>   | <i>Hedyotis shenzhenensis</i>       | JF699807 |
| Eudicotyledons | Rubiaceae     | <i>Hedyotis</i>   | <i>Hedyotis shenzhenensis</i>       | JN044781 |

|                |               |                       |                                     |          |
|----------------|---------------|-----------------------|-------------------------------------|----------|
| Eudicotyledons | Rubiaceae     | <i>Hedyotis</i>       | <i>Hedyotis shenzhenensis</i>       | JN044782 |
| Eudicotyledons | Rubiaceae     | <i>Hedyotis</i>       | <i>Hedyotis uncinella</i>           | JF699814 |
| Eudicotyledons | Rubiaceae     | <i>Hedyotis</i>       | <i>Hedyotis uncinella</i>           | JF699815 |
| Eudicotyledons | Rubiaceae     | <i>Hedyotis</i>       | <i>Hedyotis uncinella</i>           | JN044789 |
| Eudicotyledons | Rubiaceae     | <i>Hedyotis</i>       | <i>Hedyotis uncinella</i>           | JN044790 |
| Eudicotyledons | Lamiaceae     | <i>Lamium</i>         | <i>Lamium barbatum</i>              | JF780113 |
| Eudicotyledons | Lamiaceae     | <i>Lamium</i>         | <i>Lamium barbatum</i>              | JF780114 |
| Eudicotyledons | Lamiaceae     | <i>Lamium</i>         | <i>Lamium barbatum</i>              | JF780115 |
| Eudicotyledons | Lamiaceae     | <i>Lamium</i>         | <i>Lamium barbatum</i>              | HM590111 |
| Eudicotyledons | Ranunculaceae | <i>Aconitum</i>       | <i>Aconitum shennongjiaense</i>     | JN043770 |
| Eudicotyledons | Ranunculaceae | <i>Aconitum</i>       | <i>Aconitum shennongjiaense</i>     | JN043771 |
| Eudicotyledons | Rubiaceae     | <i>Leptodermis</i>    | <i>Leptodermis forrestii</i>        | JN045151 |
| Eudicotyledons | Rubiaceae     | <i>Leptodermis</i>    | <i>Leptodermis forrestii</i>        | JN045152 |
| Eudicotyledons | Lamiaceae     | <i>Lamium</i>         | <i>Lamium x holsaticum</i>          | JF780157 |
| Eudicotyledons | Lamiaceae     | <i>Lamium</i>         | <i>Lamium x holsaticum</i>          | JF780158 |
| Eudicotyledons | Lamiaceae     | <i>Lamium</i>         | <i>Lamium bifidum</i>               | JF780128 |
| Eudicotyledons | Lamiaceae     | <i>Lamium</i>         | <i>Lamium bifidum</i>               | JF780129 |
| Eudicotyledons | Lamiaceae     | <i>Lamium</i>         | <i>Lamium bifidum</i>               | JF780130 |
| Eudicotyledons | Lamiaceae     | <i>Lamium</i>         | <i>Lamium confertum</i>             | JF780131 |
| Eudicotyledons | Lamiaceae     | <i>Lamium</i>         | <i>Lamium confertum</i>             | JF780132 |
| Eudicotyledons | Lamiaceae     | <i>Lamium</i>         | <i>Lamium confertum</i>             | JF780133 |
| Eudicotyledons | Lamiaceae     | <i>Lamium</i>         | <i>Lamium eriocephalum</i>          | JF780135 |
| Eudicotyledons | Lamiaceae     | <i>Lamium</i>         | <i>Lamium eriocephalum</i>          | JF780136 |
| Eudicotyledons | Lamiaceae     | <i>Lamium</i>         | <i>Lamium flexuosum</i>             | JF780137 |
| Eudicotyledons | Lamiaceae     | <i>Lamium</i>         | <i>Lamium flexuosum</i>             | JF780138 |
| Eudicotyledons | Lamiaceae     | <i>Lamium</i>         | <i>Lamium flexuosum</i>             | JF780139 |
| Eudicotyledons | Lamiaceae     | <i>Lamium</i>         | <i>Lamium galactophyllum</i>        | JF780140 |
| Eudicotyledons | Lamiaceae     | <i>Lamium</i>         | <i>Lamium galactophyllum</i>        | JF780141 |
| Eudicotyledons | Lamiaceae     | <i>Lamium</i>         | <i>Lamium macrodon</i>              | JF780164 |
| Eudicotyledons | Lamiaceae     | <i>Lamium</i>         | <i>Lamium macrodon</i>              | JF780165 |
| Eudicotyledons | Lamiaceae     | <i>Lamium</i>         | <i>Lamium macrodon</i>              | JF780166 |
| Eudicotyledons | Lamiaceae     | <i>Lamium</i>         | <i>Lamium moschatum</i>             | JF780169 |
| Eudicotyledons | Lamiaceae     | <i>Lamium</i>         | <i>Lamium moschatum</i>             | JF780171 |
| Eudicotyledons | Lamiaceae     | <i>Lamium</i>         | <i>Lamium moschatum</i>             | HQ902821 |
| Eudicotyledons | Lamiaceae     | <i>Lamium</i>         | <i>Lamium multifidum</i>            | JF780172 |
| Eudicotyledons | Lamiaceae     | <i>Lamium</i>         | <i>Lamium multifidum</i>            | JF780173 |
| Eudicotyledons | Lamiaceae     | <i>Lamium</i>         | <i>Lamium orientale</i>             | JF780174 |
| Eudicotyledons | Lamiaceae     | <i>Lamium</i>         | <i>Lamium orientale</i>             | JF780175 |
| Eudicotyledons | Lamiaceae     | <i>Lamium</i>         | <i>Lamium orvala</i>                | JF780176 |
| Eudicotyledons | Lamiaceae     | <i>Lamium</i>         | <i>Lamium orvala</i>                | JF780177 |
| Eudicotyledons | Lamiaceae     | <i>Lamium</i>         | <i>Lamium orvala</i>                | JF780178 |
| Eudicotyledons | Lamiaceae     | <i>Lamium</i>         | <i>Lamium orvala</i>                | JF780179 |
| Eudicotyledons | Lamiaceae     | <i>Thymus</i>         | <i>Thymus sipyleus</i>              | HQ902849 |
| Eudicotyledons | Lamiaceae     | <i>Thymus</i>         | <i>Thymus sipyleus</i>              | HQ902878 |
| Eudicotyledons | Asteraceae    | <i>Symphyotrichum</i> | <i>Symphyotrichum cordifolium</i>   | HQ596857 |
| Eudicotyledons | Asteraceae    | <i>Symphyotrichum</i> | <i>Symphyotrichum cordifolium</i>   | DQ006144 |
| Eudicotyledons | Asteraceae    | <i>Nabalus</i>        | <i>Nabalus altissimus</i>           | HQ596801 |
| Eudicotyledons | Asteraceae    | <i>Nabalus</i>        | <i>Nabalus altissimus</i>           | HQ162010 |
| Eudicotyledons | Asteraceae    | <i>Symphyotrichum</i> | <i>Symphyotrichum novae-angliae</i> | GU818335 |
| Eudicotyledons | Asteraceae    | <i>Symphyotrichum</i> | <i>Symphyotrichum novae-angliae</i> | EU750589 |
| Eudicotyledons | Asteraceae    | <i>Symphyotrichum</i> | <i>Symphyotrichum novae-angliae</i> | EU750590 |
| Eudicotyledons | Asteraceae    | <i>Symphyotrichum</i> | <i>Symphyotrichum novae-angliae</i> | EU750591 |
| Eudicotyledons | Asteraceae    | <i>Symphyotrichum</i> | <i>Symphyotrichum novae-angliae</i> | EU750592 |







|                |                |                    |                                  |          |
|----------------|----------------|--------------------|----------------------------------|----------|
| Eudicotyledons | Zygophyllaceae | <i>Larrea</i>      | <i>Larrea tridentata</i>         | JF266817 |
| Eudicotyledons | Zygophyllaceae | <i>Larrea</i>      | <i>Larrea tridentata</i>         | JF266818 |
| Eudicotyledons | Zygophyllaceae | <i>Larrea</i>      | <i>Larrea tridentata</i>         | JF266819 |
| Eudicotyledons | Zygophyllaceae | <i>Zygophyllum</i> | <i>Zygophyllum fabago</i>        | JN047533 |
| Eudicotyledons | Zygophyllaceae | <i>Zygophyllum</i> | <i>Zygophyllum fabago</i>        | JN047534 |
| Eudicotyledons | Zygophyllaceae | <i>Zygophyllum</i> | <i>Zygophyllum fabago</i>        | JN047535 |
| Eudicotyledons | Caryocaraceae  | <i>Caryocar</i>    | <i>Caryocar glabrum</i>          | GQ428701 |
| Eudicotyledons | Caryocaraceae  | <i>Caryocar</i>    | <i>Caryocar glabrum</i>          | FJ038884 |
| Eudicotyledons | Caryocaraceae  | <i>Caryocar</i>    | <i>Caryocar glabrum</i>          | FJ038885 |
| Eudicotyledons | Betulaceae     | <i>Ostryopsis</i>  | <i>Ostryopsis davidiana</i>      | EU852626 |
| Eudicotyledons | Betulaceae     | <i>Ostryopsis</i>  | <i>Ostryopsis davidiana</i>      | EU852627 |
| Eudicotyledons | Betulaceae     | <i>Ostryopsis</i>  | <i>Ostryopsis davidiana</i>      | EU852628 |
| Eudicotyledons | Betulaceae     | <i>Ostryopsis</i>  | <i>Ostryopsis davidiana</i>      | EU852629 |
| Eudicotyledons | Betulaceae     | <i>Ostryopsis</i>  | <i>Ostryopsis davidiana</i>      | EU852630 |
| Eudicotyledons | Betulaceae     | <i>Ostryopsis</i>  | <i>Ostryopsis davidiana</i>      | EU852631 |
| Eudicotyledons | Betulaceae     | <i>Ostryopsis</i>  | <i>Ostryopsis davidiana</i>      | JN045670 |
| Eudicotyledons | Betulaceae     | <i>Ostryopsis</i>  | <i>Ostryopsis davidiana</i>      | JN045671 |
| Eudicotyledons | Betulaceae     | <i>Ostryopsis</i>  | <i>Ostryopsis davidiana</i>      | JN045672 |
| Eudicotyledons | Betulaceae     | <i>Ostryopsis</i>  | <i>Ostryopsis davidiana</i>      | JN045673 |
| Eudicotyledons | Betulaceae     | <i>Ostryopsis</i>  | <i>Ostryopsis davidiana</i>      | JN045674 |
| Eudicotyledons | Betulaceae     | <i>Ostryopsis</i>  | <i>Ostryopsis davidiana</i>      | JN045675 |
| Eudicotyledons | Betulaceae     | <i>Ostryopsis</i>  | <i>Ostryopsis davidiana</i>      | JN045676 |
| Eudicotyledons | Betulaceae     | <i>Ostryopsis</i>  | <i>Ostryopsis davidiana</i>      | JN045677 |
| Eudicotyledons | Betulaceae     | <i>Ostryopsis</i>  | <i>Ostryopsis davidiana</i>      | JN045678 |
| Eudicotyledons | Betulaceae     | <i>Ostryopsis</i>  | <i>Ostryopsis davidiana</i>      | JN045679 |
| Eudicotyledons | Melianthaceae  | <i>Melianthus</i>  | <i>Melianthus major</i>          | DQ435423 |
| Eudicotyledons | Melianthaceae  | <i>Melianthus</i>  | <i>Melianthus major</i>          | DQ435424 |
| Eudicotyledons | Melianthaceae  | <i>Melianthus</i>  | <i>Melianthus major</i>          | DQ435425 |
| Eudicotyledons | Malvaceae      | <i>Malope</i>      | <i>Malope trifida</i>            | EF679751 |
| Eudicotyledons | Malvaceae      | <i>Malope</i>      | <i>Malope trifida</i>            | EF419647 |
| Eudicotyledons | Malvaceae      | <i>Malope</i>      | <i>Malope trifida</i>            | EF419648 |
| Eudicotyledons | Malvaceae      | <i>Malope</i>      | <i>Malope trifida</i>            | EF419649 |
| Eudicotyledons | Zygophyllaceae | <i>Larrea</i>      | <i>Larrea nitida</i>             | JF266822 |
| Eudicotyledons | Zygophyllaceae | <i>Larrea</i>      | <i>Larrea nitida</i>             | JF266824 |
| Eudicotyledons | Malvaceae      | <i>Malva</i>       | <i>Malva nicaeensis</i>          | EF419592 |
| Eudicotyledons | Malvaceae      | <i>Malva</i>       | <i>Malva nicaeensis</i>          | EF419593 |
| Eudicotyledons | Malvaceae      | <i>Malva</i>       | <i>Malva nicaeensis</i>          | EF419594 |
| Eudicotyledons | Malvaceae      | <i>Malva</i>       | <i>Malva nicaeensis</i>          | EF419595 |
| Eudicotyledons | Malvaceae      | <i>Malva</i>       | <i>Malva nicaeensis</i>          | EF419596 |
| Eudicotyledons | Asteraceae     | <i>Blumea</i>      | <i>Blumea mollis</i>             | EU195594 |
| Eudicotyledons | Asteraceae     | <i>Blumea</i>      | <i>Blumea mollis</i>             | EU195595 |
| Eudicotyledons | Asteraceae     | <i>Blumea</i>      | <i>Blumea mollis</i>             | EU195597 |
| Eudicotyledons | Asteraceae     | <i>Blumea</i>      | <i>Blumea mollis</i>             | EF210991 |
| Eudicotyledons | Asteraceae     | <i>Blumea</i>      | <i>Blumea riparia</i>            | EU195600 |
| Eudicotyledons | Asteraceae     | <i>Blumea</i>      | <i>Blumea riparia</i>            | EF210993 |
| Eudicotyledons | Solanaceae     | <i>Grabowskia</i>  | <i>Grabowskia boerhaviifolia</i> | HM195022 |
| Eudicotyledons | Solanaceae     | <i>Grabowskia</i>  | <i>Grabowskia boerhaviifolia</i> | HQ216156 |
| Eudicotyledons | Solanaceae     | <i>Grabowskia</i>  | <i>Grabowskia boerhaviifolia</i> | JF284422 |
| Eudicotyledons | Solanaceae     | <i>Grabowskia</i>  | <i>Grabowskia boerhaviifolia</i> | JF284423 |
| Eudicotyledons | Solanaceae     | <i>Grabowskia</i>  | <i>Grabowskia boerhaviifolia</i> | JF284424 |
| Eudicotyledons | Solanaceae     | <i>Grabowskia</i>  | <i>Grabowskia boerhaviifolia</i> | JF284425 |
| Eudicotyledons | Solanaceae     | <i>Grabowskia</i>  | <i>Grabowskia boerhaviifolia</i> | JF284426 |
| Eudicotyledons | Solanaceae     | <i>Grabowskia</i>  | <i>Grabowskia duplicata</i>      | JF284427 |

|                |               |                    |                              |          |
|----------------|---------------|--------------------|------------------------------|----------|
| Eudicotyledons | Solanaceae    | <i>Grabowskia</i>  | <i>Grabowskia duplicata</i>  | JF284428 |
| Eudicotyledons | Asteraceae    | <i>Tanacetum</i>   | <i>Tanacetum corymbosum</i>  | AB683392 |
| Eudicotyledons | Asteraceae    | <i>Tanacetum</i>   | <i>Tanacetum corymbosum</i>  | FR865113 |
| Eudicotyledons | Asteraceae    | <i>Tanacetum</i>   | <i>Tanacetum parthenium</i>  | AB683414 |
| Eudicotyledons | Asteraceae    | <i>Tanacetum</i>   | <i>Tanacetum parthenium</i>  | AB683415 |
| Eudicotyledons | Malvaceae     | <i>Malva</i>       | <i>Malva dendromorpha</i>    | EF419585 |
| Eudicotyledons | Malvaceae     | <i>Malva</i>       | <i>Malva dendromorpha</i>    | EF419586 |
| Eudicotyledons | Malvaceae     | <i>Malva</i>       | <i>Malva dendromorpha</i>    | EF419587 |
| Eudicotyledons | Malvaceae     | <i>Malva</i>       | <i>Malva linnaei</i>         | EF419588 |
| Eudicotyledons | Malvaceae     | <i>Malva</i>       | <i>Malva linnaei</i>         | EF419589 |
| Eudicotyledons | Malvaceae     | <i>Malva</i>       | <i>Malva linnaei</i>         | EF419590 |
| Eudicotyledons | Malvaceae     | <i>Malva</i>       | <i>Malva linnaei</i>         | EF419591 |
| Eudicotyledons | Malvaceae     | <i>Malva</i>       | <i>Malva parviflora</i>      | EF419601 |
| Eudicotyledons | Malvaceae     | <i>Malva</i>       | <i>Malva parviflora</i>      | EF419602 |
| Eudicotyledons | Malvaceae     | <i>Malva</i>       | <i>Malva parviflora</i>      | EF419603 |
| Eudicotyledons | Malvaceae     | <i>Malva</i>       | <i>Malva parviflora</i>      | EF419604 |
| Eudicotyledons | Malvaceae     | <i>Malva</i>       | <i>Malva sylvestris</i>      | EF419599 |
| Eudicotyledons | Malvaceae     | <i>Malva</i>       | <i>Malva sylvestris</i>      | EF419600 |
| Eudicotyledons | Malvaceae     | <i>Malva</i>       | <i>Malva sylvestris</i>      | EF590714 |
| Eudicotyledons | Malvaceae     | <i>Malva</i>       | <i>Malva wigandii</i>        | EF419572 |
| Eudicotyledons | Malvaceae     | <i>Malva</i>       | <i>Malva wigandii</i>        | EF419573 |
| Eudicotyledons | Malvaceae     | <i>Malva</i>       | <i>Malva wigandii</i>        | EF419574 |
| Eudicotyledons | Malvaceae     | <i>Malva</i>       | <i>Malva wigandii</i>        | EF419575 |
| Eudicotyledons | Malvaceae     | <i>Malva</i>       | <i>Malva wigandii</i>        | EF419576 |
| Eudicotyledons | Asteraceae    | <i>Sinosenecio</i> | <i>Sinosenecio koreanus</i>  | JN047167 |
| Eudicotyledons | Asteraceae    | <i>Sinosenecio</i> | <i>Sinosenecio koreanus</i>  | JN047168 |
| Eudicotyledons | Asteraceae    | <i>Sinosenecio</i> | <i>Sinosenecio koreanus</i>  | JN047169 |
| Eudicotyledons | Orobanchaceae | <i>Cistanche</i>   | <i>Cistanche deserticola</i> | GQ435468 |
| Eudicotyledons | Orobanchaceae | <i>Cistanche</i>   | <i>Cistanche deserticola</i> | GQ435469 |
| Eudicotyledons | Orobanchaceae | <i>Cistanche</i>   | <i>Cistanche deserticola</i> | FJ914368 |
| Eudicotyledons | Orobanchaceae | <i>Cistanche</i>   | <i>Cistanche deserticola</i> | FJ914369 |
| Eudicotyledons | Orobanchaceae | <i>Cistanche</i>   | <i>Cistanche deserticola</i> | FJ914370 |
| Eudicotyledons | Orobanchaceae | <i>Cistanche</i>   | <i>Cistanche deserticola</i> | FJ914371 |
| Eudicotyledons | Orobanchaceae | <i>Cistanche</i>   | <i>Cistanche deserticola</i> | FJ914372 |
| Eudicotyledons | Orobanchaceae | <i>Cistanche</i>   | <i>Cistanche deserticola</i> | FJ914373 |
| Eudicotyledons | Orobanchaceae | <i>Cistanche</i>   | <i>Cistanche deserticola</i> | FJ914374 |
| Eudicotyledons | Orobanchaceae | <i>Cistanche</i>   | <i>Cistanche deserticola</i> | FJ914375 |
| Eudicotyledons | Orobanchaceae | <i>Cistanche</i>   | <i>Cistanche salsa</i>       | FJ914376 |
| Eudicotyledons | Orobanchaceae | <i>Cistanche</i>   | <i>Cistanche salsa</i>       | FJ914377 |
| Eudicotyledons | Orobanchaceae | <i>Cistanche</i>   | <i>Cistanche salsa</i>       | FJ914378 |
| Eudicotyledons | Orobanchaceae | <i>Cistanche</i>   | <i>Cistanche tubulosa</i>    | GQ435163 |
| Eudicotyledons | Orobanchaceae | <i>Cistanche</i>   | <i>Cistanche tubulosa</i>    | GQ435164 |
| Eudicotyledons | Orobanchaceae | <i>Cistanche</i>   | <i>Cistanche tubulosa</i>    | FJ914381 |
| Eudicotyledons | Orobanchaceae | <i>Cistanche</i>   | <i>Cistanche tubulosa</i>    | FJ914382 |
| Eudicotyledons | Orobanchaceae | <i>Cistanche</i>   | <i>Cistanche tubulosa</i>    | FJ914383 |
| Eudicotyledons | Orobanchaceae | <i>Cistanche</i>   | <i>Cistanche tubulosa</i>    | FJ914384 |
| Eudicotyledons | Orobanchaceae | <i>Cistanche</i>   | <i>Cistanche tubulosa</i>    | FJ914385 |
| Eudicotyledons | Orobanchaceae | <i>Cistanche</i>   | <i>Cistanche tubulosa</i>    | FJ914386 |
| Eudicotyledons | Stachyuraceae | <i>Stachyurus</i>  | <i>Stachyurus himalaicus</i> | JN047255 |
| Eudicotyledons | Stachyuraceae | <i>Stachyurus</i>  | <i>Stachyurus himalaicus</i> | JN047256 |
| Eudicotyledons | Stachyuraceae | <i>Stachyurus</i>  | <i>Stachyurus himalaicus</i> | JN047257 |
| Eudicotyledons | Stachyuraceae | <i>Stachyurus</i>  | <i>Stachyurus chinensis</i>  | JN047251 |
| Eudicotyledons | Stachyuraceae | <i>Stachyurus</i>  | <i>Stachyurus chinensis</i>  | JN047252 |

|                |                |                    |                                 |          |
|----------------|----------------|--------------------|---------------------------------|----------|
| Eudicotyledons | Stachyuraceae  | <i>Stachyurus</i>  | <i>Stachyurus chinensis</i>     | JN047253 |
| Eudicotyledons | Stachyuraceae  | <i>Stachyurus</i>  | <i>Stachyurus chinensis</i>     | JN047254 |
| Eudicotyledons | Brassicaceae   | <i>Draba</i>       | <i>Draba nemorosa</i>           | JN044449 |
| Eudicotyledons | Brassicaceae   | <i>Draba</i>       | <i>Draba nemorosa</i>           | JN044450 |
| Eudicotyledons | Betulaceae     | <i>Ostryopsis</i>  | <i>Ostryopsis nobilis</i>       | AY211457 |
| Eudicotyledons | Betulaceae     | <i>Ostryopsis</i>  | <i>Ostryopsis nobilis</i>       | FJ011866 |
| Eudicotyledons | Betulaceae     | <i>Ostryopsis</i>  | <i>Ostryopsis nobilis</i>       | JN045685 |
| Eudicotyledons | Betulaceae     | <i>Ostryopsis</i>  | <i>Ostryopsis nobilis</i>       | JN045686 |
| Eudicotyledons | Betulaceae     | <i>Ostryopsis</i>  | <i>Ostryopsis nobilis</i>       | JN045687 |
| Eudicotyledons | Betulaceae     | <i>Ostryopsis</i>  | <i>Ostryopsis nobilis</i>       | JN045688 |
| Eudicotyledons | Betulaceae     | <i>Ostryopsis</i>  | <i>Ostryopsis nobilis</i>       | JN045689 |
| Eudicotyledons | Malvaceae      | <i>Talipariti</i>  | <i>Talipariti macrophyllum</i>  | AB181124 |
| Eudicotyledons | Malvaceae      | <i>Talipariti</i>  | <i>Talipariti macrophyllum</i>  | AY727165 |
| Eudicotyledons | Malvaceae      | <i>Talipariti</i>  | <i>Talipariti tiliaceum</i>     | AB181110 |
| Eudicotyledons | Malvaceae      | <i>Talipariti</i>  | <i>Talipariti tiliaceum</i>     | AB181111 |
| Eudicotyledons | Malvaceae      | <i>Talipariti</i>  | <i>Talipariti tiliaceum</i>     | AB181112 |
| Eudicotyledons | Malvaceae      | <i>Talipariti</i>  | <i>Talipariti tiliaceum</i>     | AB181113 |
| Eudicotyledons | Malvaceae      | <i>Talipariti</i>  | <i>Talipariti tiliaceum</i>     | AB181114 |
| Eudicotyledons | Malvaceae      | <i>Talipariti</i>  | <i>Talipariti tiliaceum</i>     | AB181115 |
| Eudicotyledons | Malvaceae      | <i>Talipariti</i>  | <i>Talipariti tiliaceum</i>     | AB181116 |
| Eudicotyledons | Malvaceae      | <i>Talipariti</i>  | <i>Talipariti tiliaceum</i>     | AB181117 |
| Eudicotyledons | Malvaceae      | <i>Talipariti</i>  | <i>Talipariti tiliaceum</i>     | AB181118 |
| Eudicotyledons | Malvaceae      | <i>Talipariti</i>  | <i>Talipariti tiliaceum</i>     | AB181119 |
| Eudicotyledons | Malvaceae      | <i>Talipariti</i>  | <i>Talipariti tiliaceum</i>     | AB181120 |
| Eudicotyledons | Malvaceae      | <i>Talipariti</i>  | <i>Talipariti tiliaceum</i>     | AB181121 |
| Eudicotyledons | Malvaceae      | <i>Talipariti</i>  | <i>Talipariti tiliaceum</i>     | AB181122 |
| Eudicotyledons | Malvaceae      | <i>Talipariti</i>  | <i>Talipariti tiliaceum</i>     | GU135393 |
| Eudicotyledons | Malvaceae      | <i>Malva</i>       | <i>Malva neglecta</i>           | HQ596765 |
| Eudicotyledons | Malvaceae      | <i>Malva</i>       | <i>Malva neglecta</i>           | EF419597 |
| Eudicotyledons | Malvaceae      | <i>Malva</i>       | <i>Malva neglecta</i>           | EF419598 |
| Eudicotyledons | Asteraceae     | <i>Sinosenecio</i> | <i>Sinosenecio globiger</i>     | JN047149 |
| Eudicotyledons | Asteraceae     | <i>Sinosenecio</i> | <i>Sinosenecio globiger</i>     | JN047150 |
| Eudicotyledons | Asteraceae     | <i>Sinosenecio</i> | <i>Sinosenecio globiger</i>     | JN047151 |
| Eudicotyledons | Asteraceae     | <i>Sinosenecio</i> | <i>Sinosenecio globiger</i>     | JN047152 |
| Eudicotyledons | Asteraceae     | <i>Sinosenecio</i> | <i>Sinosenecio oldhamianus</i>  | JN047177 |
| Eudicotyledons | Asteraceae     | <i>Sinosenecio</i> | <i>Sinosenecio oldhamianus</i>  | JN047178 |
| Eudicotyledons | Asteraceae     | <i>Sinosenecio</i> | <i>Sinosenecio oldhamianus</i>  | JN047179 |
| Eudicotyledons | Asteraceae     | <i>Sinosenecio</i> | <i>Sinosenecio subcoriaceus</i> | JN047190 |
| Eudicotyledons | Asteraceae     | <i>Sinosenecio</i> | <i>Sinosenecio subcoriaceus</i> | JN047191 |
| Eudicotyledons | Asteraceae     | <i>Sinosenecio</i> | <i>Sinosenecio subcoriaceus</i> | JN047192 |
| Eudicotyledons | Asteraceae     | <i>Sinosenecio</i> | <i>Sinosenecio subcoriaceus</i> | JN047193 |
| Eudicotyledons | Zygophyllaceae | <i>Zygophyllum</i> | <i>Zygophyllum pterocarpum</i>  | JN047540 |
| Eudicotyledons | Zygophyllaceae | <i>Zygophyllum</i> | <i>Zygophyllum pterocarpum</i>  | JN047541 |
| Eudicotyledons | Brassicaceae   | <i>Draba</i>       | <i>Draba lanceolata</i>         | JN044445 |
| Eudicotyledons | Brassicaceae   | <i>Draba</i>       | <i>Draba lanceolata</i>         | JN044446 |
| Eudicotyledons | Brassicaceae   | <i>Draba</i>       | <i>Draba lanceolata</i>         | JN044447 |
| Eudicotyledons | Brassicaceae   | <i>Draba</i>       | <i>Draba lanceolata</i>         | JN044448 |
| Eudicotyledons | Cucurbitaceae  | <i>Hemsleya</i>    | <i>Hemsleya lijiangensis</i>    | EF424070 |
| Eudicotyledons | Cucurbitaceae  | <i>Hemsleya</i>    | <i>Hemsleya lijiangensis</i>    | JN044845 |
| Eudicotyledons | Cucurbitaceae  | <i>Hemsleya</i>    | <i>Hemsleya lijiangensis</i>    | JN044846 |
| Eudicotyledons | Cucurbitaceae  | <i>Hemsleya</i>    | <i>Hemsleya lijiangensis</i>    | JN044847 |
| Eudicotyledons | Cucurbitaceae  | <i>Hemsleya</i>    | <i>Hemsleya lijiangensis</i>    | JN044848 |
| Eudicotyledons | Cucurbitaceae  | <i>Hemsleya</i>    | <i>Hemsleya lijiangensis</i>    | JN044849 |



|                |                |                     |                                |          |
|----------------|----------------|---------------------|--------------------------------|----------|
| Eudicotyledons | Thymelaeaceae  | <i>Daphne</i>       | <i>Daphne gnidium</i>          | GQ167441 |
| Eudicotyledons | Thymelaeaceae  | <i>Daphne</i>       | <i>Daphne gnidium</i>          | GQ167442 |
| Eudicotyledons | Thymelaeaceae  | <i>Daphne</i>       | <i>Daphne gnidium</i>          | GQ167443 |
| Eudicotyledons | Thymelaeaceae  | <i>Daphne</i>       | <i>Daphne gnidium</i>          | GQ167444 |
| Eudicotyledons | Loranthaceae   | <i>Helixanthera</i> | <i>Helixanthera parasitica</i> | HQ317802 |
| Eudicotyledons | Loranthaceae   | <i>Helixanthera</i> | <i>Helixanthera parasitica</i> | HQ317803 |
| Eudicotyledons | Loranthaceae   | <i>Helixanthera</i> | <i>Helixanthera parasitica</i> | HQ317804 |
| Eudicotyledons | Loranthaceae   | <i>Helixanthera</i> | <i>Helixanthera parasitica</i> | HQ317805 |
| Eudicotyledons | Loranthaceae   | <i>Helixanthera</i> | <i>Helixanthera parasitica</i> | JN687573 |
| Eudicotyledons | Orobanchaceae  | <i>Cistanche</i>    | <i>Cistanche sinensis</i>      | FJ914379 |
| Eudicotyledons | Orobanchaceae  | <i>Cistanche</i>    | <i>Cistanche sinensis</i>      | FJ914380 |
| Eudicotyledons | Zygophyllaceae | <i>Zygophyllum</i>  | <i>Zygophyllum rosowii</i>     | JN047542 |
| Eudicotyledons | Zygophyllaceae | <i>Zygophyllum</i>  | <i>Zygophyllum rosowii</i>     | JN047543 |
| Eudicotyledons | Boraginaceae   | <i>Cordia</i>       | <i>Cordia alliodora</i>        | JQ710508 |
| Eudicotyledons | Boraginaceae   | <i>Cordia</i>       | <i>Cordia alliodora</i>        | JQ710509 |
| Eudicotyledons | Boraginaceae   | <i>Cordia</i>       | <i>Cordia alliodora</i>        | JQ710510 |
| Eudicotyledons | Boraginaceae   | <i>Cordia</i>       | <i>Cordia alliodora</i>        | JQ710511 |
| Eudicotyledons | Boraginaceae   | <i>Cordia</i>       | <i>Cordia alliodora</i>        | JQ710512 |
| Eudicotyledons | Boraginaceae   | <i>Cordia</i>       | <i>Cordia alliodora</i>        | JQ710513 |
| Eudicotyledons | Boraginaceae   | <i>Cordia</i>       | <i>Cordia alliodora</i>        | JQ710514 |
| Eudicotyledons | Boraginaceae   | <i>Cordia</i>       | <i>Cordia alliodora</i>        | JQ710515 |
| Eudicotyledons | Boraginaceae   | <i>Cordia</i>       | <i>Cordia alliodora</i>        | JQ710516 |
| Eudicotyledons | Boraginaceae   | <i>Cordia</i>       | <i>Cordia alliodora</i>        | JQ710517 |
| Eudicotyledons | Boraginaceae   | <i>Cordia</i>       | <i>Cordia alliodora</i>        | JQ710518 |
| Eudicotyledons | Boraginaceae   | <i>Cordia</i>       | <i>Cordia alliodora</i>        | JQ710519 |
| Eudicotyledons | Boraginaceae   | <i>Cordia</i>       | <i>Cordia alliodora</i>        | JQ710520 |
| Eudicotyledons | Boraginaceae   | <i>Cordia</i>       | <i>Cordia alliodora</i>        | JQ710521 |
| Eudicotyledons | Boraginaceae   | <i>Cordia</i>       | <i>Cordia alliodora</i>        | JQ710522 |
| Eudicotyledons | Boraginaceae   | <i>Cordia</i>       | <i>Cordia alliodora</i>        | JQ710523 |
| Eudicotyledons | Boraginaceae   | <i>Cordia</i>       | <i>Cordia alliodora</i>        | JQ710524 |
| Eudicotyledons | Boraginaceae   | <i>Cordia</i>       | <i>Cordia alliodora</i>        | JQ710525 |
| Eudicotyledons | Boraginaceae   | <i>Cordia</i>       | <i>Cordia alliodora</i>        | JQ710526 |
| Eudicotyledons | Boraginaceae   | <i>Cordia</i>       | <i>Cordia alliodora</i>        | JQ710527 |
| Eudicotyledons | Boraginaceae   | <i>Cordia</i>       | <i>Cordia alliodora</i>        | JQ710528 |
| Eudicotyledons | Boraginaceae   | <i>Cordia</i>       | <i>Cordia alliodora</i>        | JQ710529 |
| Eudicotyledons | Boraginaceae   | <i>Cordia</i>       | <i>Cordia alliodora</i>        | JQ710530 |
| Eudicotyledons | Boraginaceae   | <i>Cordia</i>       | <i>Cordia alliodora</i>        | JQ710531 |
| Eudicotyledons | Boraginaceae   | <i>Cordia</i>       | <i>Cordia alliodora</i>        | JQ710532 |
| Eudicotyledons | Boraginaceae   | <i>Cordia</i>       | <i>Cordia alliodora</i>        | JQ710533 |
| Eudicotyledons | Boraginaceae   | <i>Cordia</i>       | <i>Cordia alliodora</i>        | JQ710534 |
| Eudicotyledons | Boraginaceae   | <i>Cordia</i>       | <i>Cordia alliodora</i>        | JQ710535 |
| Eudicotyledons | Boraginaceae   | <i>Cordia</i>       | <i>Cordia alliodora</i>        | JQ710536 |
| Eudicotyledons | Boraginaceae   | <i>Cordia</i>       | <i>Cordia alliodora</i>        | JQ710537 |
| Eudicotyledons | Boraginaceae   | <i>Cordia</i>       | <i>Cordia alliodora</i>        | JQ710538 |
| Eudicotyledons | Boraginaceae   | <i>Cordia</i>       | <i>Cordia alliodora</i>        | JQ710539 |
| Eudicotyledons | Boraginaceae   | <i>Cordia</i>       | <i>Cordia alliodora</i>        | JQ710540 |
| Eudicotyledons | Boraginaceae   | <i>Cordia</i>       | <i>Cordia alliodora</i>        | JQ710541 |
| Eudicotyledons | Boraginaceae   | <i>Cordia</i>       | <i>Cordia alliodora</i>        | JQ710542 |
| Eudicotyledons | Boraginaceae   | <i>Cordia</i>       | <i>Cordia alliodora</i>        | JQ710543 |
| Eudicotyledons | Boraginaceae   | <i>Cordia</i>       | <i>Cordia alliodora</i>        | JQ710544 |
| Eudicotyledons | Boraginaceae   | <i>Cordia</i>       | <i>Cordia alliodora</i>        | JQ710545 |
| Eudicotyledons | Boraginaceae   | <i>Cordia</i>       | <i>Cordia alliodora</i>        | JQ710546 |
| Eudicotyledons | Boraginaceae   | <i>Cordia</i>       | <i>Cordia alliodora</i>        | JQ710547 |

|                |               |                            |                                  |          |
|----------------|---------------|----------------------------|----------------------------------|----------|
| Eudicotyledons | Boraginaceae  | <i>Cordia</i>              | <i>Cordia alliodora</i>          | JQ710548 |
| Eudicotyledons | Boraginaceae  | <i>Cordia</i>              | <i>Cordia alliodora</i>          | JQ710549 |
| Eudicotyledons | Boraginaceae  | <i>Cordia</i>              | <i>Cordia alliodora</i>          | JQ710550 |
| Eudicotyledons | Boraginaceae  | <i>Cordia</i>              | <i>Cordia alliodora</i>          | JQ710551 |
| Eudicotyledons | Boraginaceae  | <i>Cordia</i>              | <i>Cordia alliodora</i>          | GQ982196 |
| Eudicotyledons | Malvaceae     | <i>Talipariti</i>          | <i>Talipariti glabrum</i>        | AB181101 |
| Eudicotyledons | Malvaceae     | <i>Talipariti</i>          | <i>Talipariti glabrum</i>        | AB181102 |
| Eudicotyledons | Malvaceae     | <i>Talipariti</i>          | <i>Talipariti glabrum</i>        | AB181103 |
| Eudicotyledons | Malvaceae     | <i>Talipariti</i>          | <i>Talipariti glabrum</i>        | AB181104 |
| Eudicotyledons | Malvaceae     | <i>Talipariti</i>          | <i>Talipariti glabrum</i>        | AB181105 |
| Eudicotyledons | Malvaceae     | <i>Talipariti</i>          | <i>Talipariti glabrum</i>        | AB181106 |
| Eudicotyledons | Malvaceae     | <i>Talipariti</i>          | <i>Talipariti glabrum</i>        | AB181107 |
| Eudicotyledons | Malvaceae     | <i>Talipariti</i>          | <i>Talipariti glabrum</i>        | AB181108 |
| Eudicotyledons | Malvaceae     | <i>Talipariti</i>          | <i>Talipariti glabrum</i>        | AB181109 |
| Eudicotyledons | Asteraceae    | <i>Tanacetum</i>           | <i>Tanacetum abrotanifolium</i>  | AB683373 |
| Eudicotyledons | Asteraceae    | <i>Tanacetum</i>           | <i>Tanacetum abrotanifolium</i>  | AB683374 |
| Eudicotyledons | Asteraceae    | <i>Tanacetum</i>           | <i>Tanacetum balsamita</i>       | AB683382 |
| Eudicotyledons | Asteraceae    | <i>Tanacetum</i>           | <i>Tanacetum balsamita</i>       | AB683383 |
| Eudicotyledons | Asteraceae    | <i>Tanacetum</i>           | <i>Tanacetum coccineum</i>       | AB683391 |
| Eudicotyledons | Asteraceae    | <i>Tanacetum</i>           | <i>Tanacetum coccineum</i>       | FR689920 |
| Eudicotyledons | Asteraceae    | <i>Tanacetum</i>           | <i>Tanacetum pinnatum</i>        | AB683416 |
| Eudicotyledons | Asteraceae    | <i>Tanacetum</i>           | <i>Tanacetum pinnatum</i>        | AB683417 |
| Eudicotyledons | Asteraceae    | <i>Tanacetum</i>           | <i>Tanacetum punctatum</i>       | AB683424 |
| Eudicotyledons | Asteraceae    | <i>Tanacetum</i>           | <i>Tanacetum punctatum</i>       | AB683425 |
| Eudicotyledons | Asteraceae    | <i>Tanacetum</i>           | <i>Tanacetum kotschyi</i>        | AB683405 |
| Eudicotyledons | Asteraceae    | <i>Tanacetum</i>           | <i>Tanacetum kotschyi</i>        | AB683406 |
| Eudicotyledons | Rubiaceae     | <i>Razafimandimbisonia</i> | <i>Razafimandimbisonia minor</i> | AM939390 |
| Eudicotyledons | Rubiaceae     | <i>Razafimandimbisonia</i> | <i>Razafimandimbisonia minor</i> | AM939391 |
| Eudicotyledons | Rubiaceae     | <i>Razafimandimbisonia</i> | <i>Razafimandimbisonia minor</i> | AM939392 |
| Eudicotyledons | Rubiaceae     | <i>Razafimandimbisonia</i> | <i>Razafimandimbisonia minor</i> | AM939393 |
| Eudicotyledons | Solanaceae    | <i>Grabowskia</i>          | <i>Grabowskia obtusa</i>         | JF284429 |
| Eudicotyledons | Solanaceae    | <i>Grabowskia</i>          | <i>Grabowskia obtusa</i>         | JF284430 |
| Eudicotyledons | Sapotaceae    | <i>Pouteria</i>            | <i>Pouteria guianensis</i>       | DQ344134 |
| Eudicotyledons | Sapotaceae    | <i>Pouteria</i>            | <i>Pouteria guianensis</i>       | GQ428712 |
| Eudicotyledons | Sapotaceae    | <i>Pouteria</i>            | <i>Pouteria guianensis</i>       | GQ428713 |
| Eudicotyledons | Stachyuraceae | <i>Stachyurus</i>          | <i>Stachyurus yunnanensis</i>    | JN047258 |
| Eudicotyledons | Stachyuraceae | <i>Stachyurus</i>          | <i>Stachyurus yunnanensis</i>    | JN047259 |
| Eudicotyledons | Stachyuraceae | <i>Stachyurus</i>          | <i>Stachyurus yunnanensis</i>    | JN047260 |
| Eudicotyledons | Melanthaceae  | <i>Melianthus</i>          | <i>Melianthus comosus</i>        | DQ435427 |
| Eudicotyledons | Melanthaceae  | <i>Melianthus</i>          | <i>Melianthus comosus</i>        | DQ435428 |
| Eudicotyledons | Melanthaceae  | <i>Melianthus</i>          | <i>Melianthus comosus</i>        | DQ435429 |
| Eudicotyledons | Melanthaceae  | <i>Melianthus</i>          | <i>Melianthus comosus</i>        | DQ435430 |
| Eudicotyledons | Melanthaceae  | <i>Melianthus</i>          | <i>Melianthus comosus</i>        | DQ435431 |
| Eudicotyledons | Melanthaceae  | <i>Melianthus</i>          | <i>Melianthus pectinatus</i>     | DQ435434 |
| Eudicotyledons | Melanthaceae  | <i>Melianthus</i>          | <i>Melianthus pectinatus</i>     | DQ435435 |
| Eudicotyledons | Sapotaceae    | <i>Pouteria</i>            | <i>Pouteria torta</i>            | FJ039081 |
| Eudicotyledons | Sapotaceae    | <i>Pouteria</i>            | <i>Pouteria torta</i>            | FJ039082 |
| Eudicotyledons | Asteraceae    | <i>Blumea</i>              | <i>Blumea aromatica</i>          | EU195586 |
| Eudicotyledons | Asteraceae    | <i>Blumea</i>              | <i>Blumea aromatica</i>          | EF210998 |
| Eudicotyledons | Asteraceae    | <i>Blumea</i>              | <i>Blumea clarkei</i>            | EU195587 |
| Eudicotyledons | Asteraceae    | <i>Blumea</i>              | <i>Blumea clarkei</i>            | EF211020 |
| Eudicotyledons | Asteraceae    | <i>Blumea</i>              | <i>Blumea densiflora</i>         | EU195588 |
| Eudicotyledons | Asteraceae    | <i>Blumea</i>              | <i>Blumea densiflora</i>         | EF210983 |



|                |            |               |                             |          |
|----------------|------------|---------------|-----------------------------|----------|
| Eudicotyledons | Asteraceae | <i>Blumea</i> | <i>Blumea fistulosa</i>     | EU195589 |
| Eudicotyledons | Asteraceae | <i>Blumea</i> | <i>Blumea fistulosa</i>     | EF210984 |
| Eudicotyledons | Asteraceae | <i>Blumea</i> | <i>Blumea megacephala</i>   | EU195593 |
| Eudicotyledons | Asteraceae | <i>Blumea</i> | <i>Blumea megacephala</i>   | EF211010 |
| Eudicotyledons | Asteraceae | <i>Blumea</i> | <i>Blumea paniculata</i>    | EU195599 |
| Eudicotyledons | Asteraceae | <i>Blumea</i> | <i>Blumea paniculata</i>    | EF210990 |
| Eudicotyledons | Asteraceae | <i>Blumea</i> | <i>Blumea sinuata</i>       | EU195601 |
| Eudicotyledons | Asteraceae | <i>Blumea</i> | <i>Blumea sinuata</i>       | EF210996 |
| Eudicotyledons | Asteraceae | <i>Blumea</i> | <i>Blumea virens</i>        | EU195602 |
| Eudicotyledons | Asteraceae | <i>Blumea</i> | <i>Blumea virens</i>        | EF211005 |
| Eudicotyledons | Malvaceae  | <i>Malva</i>  | <i>Malva alcea</i>          | GQ248337 |
| Eudicotyledons | Malvaceae  | <i>Malva</i>  | <i>Malva alcea</i>          | EF419609 |
| Eudicotyledons | Malvaceae  | <i>Malva</i>  | <i>Malva alcea</i>          | EF419610 |
| Eudicotyledons | Malvaceae  | <i>Malva</i>  | <i>Malva alcea</i>          | EF419611 |
| Eudicotyledons | Malvaceae  | <i>Malva</i>  | <i>Malva alcea</i>          | EF590713 |
| Eudicotyledons | Malvaceae  | <i>Malva</i>  | <i>Malva alcea</i>          | HM214493 |
| Eudicotyledons | Malvaceae  | <i>Malva</i>  | <i>Malva alcea</i>          | HM214494 |
| Eudicotyledons | Malvaceae  | <i>Malva</i>  | <i>Malva alcea</i>          | HM214495 |
| Eudicotyledons | Malvaceae  | <i>Malva</i>  | <i>Malva alcea</i>          | HM214496 |
| Eudicotyledons | Malvaceae  | <i>Malva</i>  | <i>Malva alcea</i>          | HM214497 |
| Eudicotyledons | Malvaceae  | <i>Malva</i>  | <i>Malva alcea</i>          | HM214498 |
| Eudicotyledons | Malvaceae  | <i>Malva</i>  | <i>Malva alcea</i>          | HM214499 |
| Eudicotyledons | Malvaceae  | <i>Malva</i>  | <i>Malva alcea</i>          | HM214500 |
| Eudicotyledons | Malvaceae  | <i>Malva</i>  | <i>Malva alcea</i>          | HM214501 |
| Eudicotyledons | Malvaceae  | <i>Malva</i>  | <i>Malva alcea</i>          | HM214502 |
| Eudicotyledons | Malvaceae  | <i>Malva</i>  | <i>Malva alcea</i>          | HM214503 |
| Eudicotyledons | Malvaceae  | <i>Malva</i>  | <i>Malva alcea</i>          | HM214504 |
| Eudicotyledons | Malvaceae  | <i>Malva</i>  | <i>Malva alcea</i>          | HM214505 |
| Eudicotyledons | Malvaceae  | <i>Alcea</i>  | <i>Alcea angulata</i>       | GU166775 |
| Eudicotyledons | Malvaceae  | <i>Alcea</i>  | <i>Alcea angulata</i>       | GU166776 |
| Eudicotyledons | Malvaceae  | <i>Alcea</i>  | <i>Alcea pallida</i>        | EF679740 |
| Eudicotyledons | Malvaceae  | <i>Alcea</i>  | <i>Alcea pallida</i>        | EF419661 |
| Eudicotyledons | Malvaceae  | <i>Malope</i> | <i>Malope malacoides</i>    | EF419650 |
| Eudicotyledons | Malvaceae  | <i>Malope</i> | <i>Malope malacoides</i>    | EF419651 |
| Eudicotyledons | Malvaceae  | <i>Malva</i>  | <i>Malva aegyptia</i>       | EF419630 |
| Eudicotyledons | Malvaceae  | <i>Malva</i>  | <i>Malva aegyptia</i>       | EF419631 |
| Eudicotyledons | Malvaceae  | <i>Malva</i>  | <i>Malva aegyptia</i>       | EF419632 |
| Eudicotyledons | Malvaceae  | <i>Malva</i>  | <i>Malva hispanica</i>      | EF419606 |
| Eudicotyledons | Malvaceae  | <i>Malva</i>  | <i>Malva hispanica</i>      | EF419607 |
| Eudicotyledons | Malvaceae  | <i>Malva</i>  | <i>Malva hispanica</i>      | EF419608 |
| Eudicotyledons | Malvaceae  | <i>Malva</i>  | <i>Malva moschata</i>       | EF419615 |
| Eudicotyledons | Malvaceae  | <i>Malva</i>  | <i>Malva moschata</i>       | EF419616 |
| Eudicotyledons | Malvaceae  | <i>Malva</i>  | <i>Malva moschata</i>       | EF419617 |
| Eudicotyledons | Malvaceae  | <i>Malva</i>  | <i>Malva moschata</i>       | EF419618 |
| Eudicotyledons | Malvaceae  | <i>Malva</i>  | <i>Malva moschata</i>       | EF419619 |
| Eudicotyledons | Malvaceae  | <i>Malva</i>  | <i>Malva moschata</i>       | HM214513 |
| Eudicotyledons | Malvaceae  | <i>Malva</i>  | <i>Malva moschata</i>       | HM214514 |
| Eudicotyledons | Malvaceae  | <i>Malva</i>  | <i>Malva tournefortiana</i> | EF419612 |
| Eudicotyledons | Malvaceae  | <i>Malva</i>  | <i>Malva tournefortiana</i> | EF419613 |
| Eudicotyledons | Malvaceae  | <i>Malva</i>  | <i>Malva tournefortiana</i> | EF419614 |
| Eudicotyledons | Malvaceae  | <i>Malva</i>  | <i>Malva trifida</i>        | EF419633 |
| Eudicotyledons | Malvaceae  | <i>Malva</i>  | <i>Malva trifida</i>        | EF419634 |
| Eudicotyledons | Malvaceae  | <i>Malva</i>  | <i>Malva trifida</i>        | EF419635 |

|                |               |                 |                                  |          |
|----------------|---------------|-----------------|----------------------------------|----------|
| Eudicotyledons | Malvaceae     | <i>Malva</i>    | <i>Malva trifida</i>             | EF419636 |
| Eudicotyledons | Cucurbitaceae | <i>Hemsleya</i> | <i>Hemsleya carnosiflora</i>     | EF621685 |
| Eudicotyledons | Cucurbitaceae | <i>Hemsleya</i> | <i>Hemsleya carnosiflora</i>     | JN044807 |
| Eudicotyledons | Cucurbitaceae | <i>Hemsleya</i> | <i>Hemsleya carnosiflora</i>     | JN044808 |
| Eudicotyledons | Cucurbitaceae | <i>Hemsleya</i> | <i>Hemsleya carnosiflora</i>     | JN044809 |
| Eudicotyledons | Cucurbitaceae | <i>Hemsleya</i> | <i>Hemsleya carnosiflora</i>     | JN044810 |
| Eudicotyledons | Cucurbitaceae | <i>Hemsleya</i> | <i>Hemsleya chengyihana</i>      | EF621705 |
| Eudicotyledons | Cucurbitaceae | <i>Hemsleya</i> | <i>Hemsleya chengyihana</i>      | JN044811 |
| Eudicotyledons | Cucurbitaceae | <i>Hemsleya</i> | <i>Hemsleya chengyihana</i>      | JN044812 |
| Eudicotyledons | Cucurbitaceae | <i>Hemsleya</i> | <i>Hemsleya chengyihana</i>      | JN044813 |
| Eudicotyledons | Cucurbitaceae | <i>Hemsleya</i> | <i>Hemsleya chengyihana</i>      | JN044814 |
| Eudicotyledons | Cucurbitaceae | <i>Hemsleya</i> | <i>Hemsleya chengyihana</i>      | JN044815 |
| Eudicotyledons | Cucurbitaceae | <i>Hemsleya</i> | <i>Hemsleya dipterygia</i>       | EF621704 |
| Eudicotyledons | Cucurbitaceae | <i>Hemsleya</i> | <i>Hemsleya dipterygia</i>       | JN044824 |
| Eudicotyledons | Cucurbitaceae | <i>Hemsleya</i> | <i>Hemsleya dipterygia</i>       | JN044825 |
| Eudicotyledons | Cucurbitaceae | <i>Hemsleya</i> | <i>Hemsleya dipterygia</i>       | JN044826 |
| Eudicotyledons | Cucurbitaceae | <i>Hemsleya</i> | <i>Hemsleya ellipsoidea</i>      | EF621703 |
| Eudicotyledons | Cucurbitaceae | <i>Hemsleya</i> | <i>Hemsleya ellipsoidea</i>      | JN044827 |
| Eudicotyledons | Cucurbitaceae | <i>Hemsleya</i> | <i>Hemsleya ellipsoidea</i>      | JN044828 |
| Eudicotyledons | Cucurbitaceae | <i>Hemsleya</i> | <i>Hemsleya ellipsoidea</i>      | JN044829 |
| Eudicotyledons | Cucurbitaceae | <i>Hemsleya</i> | <i>Hemsleya ellipsoidea</i>      | JN044830 |
| Eudicotyledons | Cucurbitaceae | <i>Hemsleya</i> | <i>Hemsleya ellipsoidea</i>      | JN044831 |
| Eudicotyledons | Cucurbitaceae | <i>Hemsleya</i> | <i>Hemsleya endecaphylla</i>     | EF621702 |
| Eudicotyledons | Cucurbitaceae | <i>Hemsleya</i> | <i>Hemsleya endecaphylla</i>     | JN044832 |
| Eudicotyledons | Cucurbitaceae | <i>Hemsleya</i> | <i>Hemsleya endecaphylla</i>     | JN044833 |
| Eudicotyledons | Cucurbitaceae | <i>Hemsleya</i> | <i>Hemsleya gigantea</i>         | EF621701 |
| Eudicotyledons | Cucurbitaceae | <i>Hemsleya</i> | <i>Hemsleya gigantea</i>         | JN044834 |
| Eudicotyledons | Cucurbitaceae | <i>Hemsleya</i> | <i>Hemsleya gigantea</i>         | JN044835 |
| Eudicotyledons | Cucurbitaceae | <i>Hemsleya</i> | <i>Hemsleya gigantea</i>         | JN044836 |
| Eudicotyledons | Cucurbitaceae | <i>Hemsleya</i> | <i>Hemsleya gigantea</i>         | JN044837 |
| Eudicotyledons | Cucurbitaceae | <i>Hemsleya</i> | <i>Hemsleya graciliflora</i>     | EF621700 |
| Eudicotyledons | Cucurbitaceae | <i>Hemsleya</i> | <i>Hemsleya graciliflora</i>     | JN044838 |
| Eudicotyledons | Cucurbitaceae | <i>Hemsleya</i> | <i>Hemsleya graciliflora</i>     | JN044839 |
| Eudicotyledons | Cucurbitaceae | <i>Hemsleya</i> | <i>Hemsleya graciliflora</i>     | JN044840 |
| Eudicotyledons | Cucurbitaceae | <i>Hemsleya</i> | <i>Hemsleya graciliflora</i>     | JN044841 |
| Eudicotyledons | Cucurbitaceae | <i>Hemsleya</i> | <i>Hemsleya longicarpa</i>       | EF621699 |
| Eudicotyledons | Cucurbitaceae | <i>Hemsleya</i> | <i>Hemsleya longicarpa</i>       | JN044850 |
| Eudicotyledons | Cucurbitaceae | <i>Hemsleya</i> | <i>Hemsleya longicarpa</i>       | JN044851 |
| Eudicotyledons | Cucurbitaceae | <i>Hemsleya</i> | <i>Hemsleya macrosperma</i>      | EF621697 |
| Eudicotyledons | Cucurbitaceae | <i>Hemsleya</i> | <i>Hemsleya macrosperma</i>      | JN044858 |
| Eudicotyledons | Cucurbitaceae | <i>Hemsleya</i> | <i>Hemsleya macrosperma</i>      | JN044859 |
| Eudicotyledons | Cucurbitaceae | <i>Hemsleya</i> | <i>Hemsleya macrosperma</i>      | JN044860 |
| Eudicotyledons | Cucurbitaceae | <i>Hemsleya</i> | <i>Hemsleya macrosperma</i>      | JN044861 |
| Eudicotyledons | Cucurbitaceae | <i>Hemsleya</i> | <i>Hemsleya mitrata</i>          | EF621696 |
| Eudicotyledons | Cucurbitaceae | <i>Hemsleya</i> | <i>Hemsleya mitrata</i>          | JN044862 |
| Eudicotyledons | Cucurbitaceae | <i>Hemsleya</i> | <i>Hemsleya mitrata</i>          | JN044863 |
| Eudicotyledons | Cucurbitaceae | <i>Hemsleya</i> | <i>Hemsleya mitrata</i>          | JN044864 |
| Eudicotyledons | Cucurbitaceae | <i>Hemsleya</i> | <i>Hemsleya mitrata</i>          | JN044865 |
| Eudicotyledons | Cucurbitaceae | <i>Hemsleya</i> | <i>Hemsleya omeiensis</i>        | EF621695 |
| Eudicotyledons | Cucurbitaceae | <i>Hemsleya</i> | <i>Hemsleya omeiensis</i>        | JN044866 |
| Eudicotyledons | Cucurbitaceae | <i>Hemsleya</i> | <i>Hemsleya omeiensis</i>        | JN044867 |
| Eudicotyledons | Cucurbitaceae | <i>Hemsleya</i> | <i>Hemsleya omeiensis</i>        | JN044868 |
| Eudicotyledons | Cucurbitaceae | <i>Hemsleya</i> | <i>Hemsleya panacis-scandens</i> | EF621694 |

|                |               |                 |                                  |          |
|----------------|---------------|-----------------|----------------------------------|----------|
| Eudicotyledons | Cucurbitaceae | <i>Hemsleya</i> | <i>Hemsleya panacis-scandens</i> | JN044869 |
| Eudicotyledons | Cucurbitaceae | <i>Hemsleya</i> | <i>Hemsleya panacis-scandens</i> | JN044870 |
| Eudicotyledons | Cucurbitaceae | <i>Hemsleya</i> | <i>Hemsleya panacis-scandens</i> | JN044871 |
| Eudicotyledons | Cucurbitaceae | <i>Hemsleya</i> | <i>Hemsleya panacis-scandens</i> | JN044872 |
| Eudicotyledons | Cucurbitaceae | <i>Hemsleya</i> | <i>Hemsleya panlongqi</i>        | EF621693 |
| Eudicotyledons | Cucurbitaceae | <i>Hemsleya</i> | <i>Hemsleya panlongqi</i>        | JN044873 |
| Eudicotyledons | Cucurbitaceae | <i>Hemsleya</i> | <i>Hemsleya panlongqi</i>        | JN044874 |
| Eudicotyledons | Cucurbitaceae | <i>Hemsleya</i> | <i>Hemsleya panlongqi</i>        | JN044875 |
| Eudicotyledons | Cucurbitaceae | <i>Hemsleya</i> | <i>Hemsleya pengxianensis</i>    | EF621692 |
| Eudicotyledons | Cucurbitaceae | <i>Hemsleya</i> | <i>Hemsleya pengxianensis</i>    | JN044876 |
| Eudicotyledons | Cucurbitaceae | <i>Hemsleya</i> | <i>Hemsleya pengxianensis</i>    | JN044877 |
| Eudicotyledons | Cucurbitaceae | <i>Hemsleya</i> | <i>Hemsleya pengxianensis</i>    | JN044878 |
| Eudicotyledons | Cucurbitaceae | <i>Hemsleya</i> | <i>Hemsleya turbinata</i>        | EF621690 |
| Eudicotyledons | Cucurbitaceae | <i>Hemsleya</i> | <i>Hemsleya turbinata</i>        | JN044879 |
| Eudicotyledons | Cucurbitaceae | <i>Hemsleya</i> | <i>Hemsleya turbinata</i>        | JN044880 |
| Eudicotyledons | Cucurbitaceae | <i>Hemsleya</i> | <i>Hemsleya turbinata</i>        | JN044881 |
| Eudicotyledons | Cucurbitaceae | <i>Hemsleya</i> | <i>Hemsleya turbinata</i>        | JN044882 |
| Eudicotyledons | Cucurbitaceae | <i>Hemsleya</i> | <i>Hemsleya zhejiangensis</i>    | EF621689 |
| Eudicotyledons | Cucurbitaceae | <i>Hemsleya</i> | <i>Hemsleya zhejiangensis</i>    | JN044883 |
| Eudicotyledons | Cucurbitaceae | <i>Hemsleya</i> | <i>Hemsleya zhejiangensis</i>    | JN044884 |
| Eudicotyledons | Cucurbitaceae | <i>Hemsleya</i> | <i>Hemsleya zhejiangensis</i>    | JN044885 |
| Eudicotyledons | Cucurbitaceae | <i>Hemsleya</i> | <i>Hemsleya macrocarpa</i>       | EF621698 |
| Eudicotyledons | Cucurbitaceae | <i>Hemsleya</i> | <i>Hemsleya macrocarpa</i>       | JN044852 |
| Eudicotyledons | Cucurbitaceae | <i>Hemsleya</i> | <i>Hemsleya macrocarpa</i>       | JN044853 |
| Eudicotyledons | Cucurbitaceae | <i>Hemsleya</i> | <i>Hemsleya macrocarpa</i>       | JN044854 |
| Eudicotyledons | Cucurbitaceae | <i>Hemsleya</i> | <i>Hemsleya macrocarpa</i>       | JN044855 |
| Eudicotyledons | Cucurbitaceae | <i>Hemsleya</i> | <i>Hemsleya macrocarpa</i>       | JN044856 |
| Eudicotyledons | Cucurbitaceae | <i>Hemsleya</i> | <i>Hemsleya macrocarpa</i>       | JN044857 |
| Eudicotyledons | Cucurbitaceae | <i>Hemsleya</i> | <i>Hemsleya amabilis</i>         | EF424071 |
| Eudicotyledons | Cucurbitaceae | <i>Hemsleya</i> | <i>Hemsleya amabilis</i>         | JN044795 |
| Eudicotyledons | Cucurbitaceae | <i>Hemsleya</i> | <i>Hemsleya amabilis</i>         | JN044796 |
| Eudicotyledons | Cucurbitaceae | <i>Hemsleya</i> | <i>Hemsleya amabilis</i>         | JN044797 |
| Eudicotyledons | Cucurbitaceae | <i>Hemsleya</i> | <i>Hemsleya amabilis</i>         | JN044798 |
| Eudicotyledons | Cucurbitaceae | <i>Hemsleya</i> | <i>Hemsleya amabilis</i>         | JN044799 |
| Eudicotyledons | Cucurbitaceae | <i>Hemsleya</i> | <i>Hemsleya amabilis</i>         | JN044800 |
| Eudicotyledons | Cucurbitaceae | <i>Hemsleya</i> | <i>Hemsleya amabilis</i>         | JN044801 |
| Eudicotyledons | Cucurbitaceae | <i>Hemsleya</i> | <i>Hemsleya amabilis</i>         | JN044802 |
| Eudicotyledons | Cucurbitaceae | <i>Hemsleya</i> | <i>Hemsleya amabilis</i>         | JN044803 |
| Eudicotyledons | Cucurbitaceae | <i>Hemsleya</i> | <i>Hemsleya amabilis</i>         | JN044804 |
| Eudicotyledons | Cucurbitaceae | <i>Hemsleya</i> | <i>Hemsleya amabilis</i>         | JN044805 |
| Eudicotyledons | Cucurbitaceae | <i>Hemsleya</i> | <i>Hemsleya amabilis</i>         | JN044806 |
| Eudicotyledons | Cucurbitaceae | <i>Hemsleya</i> | <i>Hemsleya chinensis</i>        | EF424069 |
| Eudicotyledons | Cucurbitaceae | <i>Hemsleya</i> | <i>Hemsleya chinensis</i>        | JN044816 |
| Eudicotyledons | Cucurbitaceae | <i>Hemsleya</i> | <i>Hemsleya chinensis</i>        | JN044817 |
| Eudicotyledons | Cucurbitaceae | <i>Hemsleya</i> | <i>Hemsleya chinensis</i>        | JN044818 |
| Eudicotyledons | Cucurbitaceae | <i>Hemsleya</i> | <i>Hemsleya chinensis</i>        | JN044819 |
| Eudicotyledons | Cucurbitaceae | <i>Hemsleya</i> | <i>Hemsleya chinensis</i>        | JN044820 |
| Eudicotyledons | Cucurbitaceae | <i>Hemsleya</i> | <i>Hemsleya chinensis</i>        | JN044821 |
| Eudicotyledons | Cucurbitaceae | <i>Hemsleya</i> | <i>Hemsleya chinensis</i>        | JN044822 |
| Eudicotyledons | Cucurbitaceae | <i>Hemsleya</i> | <i>Hemsleya chinensis</i>        | JN044823 |
| Eudicotyledons | Cucurbitaceae | <i>Hemsleya</i> | <i>Hemsleya sp. HTL-2007</i>     | EF424067 |
| Eudicotyledons | Cucurbitaceae | <i>Hemsleya</i> | <i>Hemsleya sp. HTL-2007</i>     | JN044842 |
| Eudicotyledons | Cucurbitaceae | <i>Hemsleya</i> | <i>Hemsleya sp. HTL-2007</i>     | JN044843 |

|                |               |                       |                                    |          |
|----------------|---------------|-----------------------|------------------------------------|----------|
| Eudicotyledons | Cucurbitaceae | <i>Hemsleya</i>       | <i>Hemsleya</i> sp. HTL-2007       | JN044844 |
| Eudicotyledons | Fabaceae      | <i>Aspalathus</i>     | <i>Aspalathus costulata</i>        | EU000772 |
| Eudicotyledons | Fabaceae      | <i>Aspalathus</i>     | <i>Aspalathus costulata</i>        | EU000773 |
| Eudicotyledons | Fabaceae      | <i>Aspalathus</i>     | <i>Aspalathus crenata</i>          | EU000774 |
| Eudicotyledons | Fabaceae      | <i>Aspalathus</i>     | <i>Aspalathus crenata</i>          | EU000775 |
| Eudicotyledons | Malvaceae     | <i>Alcea</i>          | <i>Alcea glabrata</i>              | GU166780 |
| Eudicotyledons | Malvaceae     | <i>Alcea</i>          | <i>Alcea glabrata</i>              | GU166781 |
| Eudicotyledons | Asteraceae    | <i>Sinosenecio</i>    | <i>Sinosenecio chienii</i>         | JN047131 |
| Eudicotyledons | Asteraceae    | <i>Sinosenecio</i>    | <i>Sinosenecio chienii</i>         | JN047132 |
| Eudicotyledons | Asteraceae    | <i>Sinosenecio</i>    | <i>Sinosenecio denticulatus</i>    | JN047136 |
| Eudicotyledons | Asteraceae    | <i>Sinosenecio</i>    | <i>Sinosenecio denticulatus</i>    | JN047137 |
| Eudicotyledons | Asteraceae    | <i>Sinosenecio</i>    | <i>Sinosenecio denticulatus</i>    | JN047138 |
| Eudicotyledons | Asteraceae    | <i>Sinosenecio</i>    | <i>Sinosenecio denticulatus</i>    | JN047139 |
| Eudicotyledons | Asteraceae    | <i>Sinosenecio</i>    | <i>Sinosenecio euosmus</i>         | GU818473 |
| Eudicotyledons | Asteraceae    | <i>Sinosenecio</i>    | <i>Sinosenecio euosmus</i>         | JN047143 |
| Eudicotyledons | Asteraceae    | <i>Sinosenecio</i>    | <i>Sinosenecio euosmus</i>         | JN047144 |
| Eudicotyledons | Asteraceae    | <i>Sinosenecio</i>    | <i>Sinosenecio euosmus</i>         | JN047145 |
| Eudicotyledons | Asteraceae    | <i>Sinosenecio</i>    | <i>Sinosenecio euosmus</i>         | JN047146 |
| Eudicotyledons | Asteraceae    | <i>Sinosenecio</i>    | <i>Sinosenecio euosmus</i>         | JN047147 |
| Eudicotyledons | Asteraceae    | <i>Sinosenecio</i>    | <i>Sinosenecio euosmus</i>         | JN047148 |
| Eudicotyledons | Asteraceae    | <i>Sinosenecio</i>    | <i>Sinosenecio guangxiensis</i>    | JN047156 |
| Eudicotyledons | Asteraceae    | <i>Sinosenecio</i>    | <i>Sinosenecio guangxiensis</i>    | JN047157 |
| Eudicotyledons | Asteraceae    | <i>Sinosenecio</i>    | <i>Sinosenecio guangxiensis</i>    | JN047158 |
| Eudicotyledons | Asteraceae    | <i>Sinosenecio</i>    | <i>Sinosenecio homogyniphyllus</i> | JN047159 |
| Eudicotyledons | Asteraceae    | <i>Sinosenecio</i>    | <i>Sinosenecio homogyniphyllus</i> | JN047160 |
| Eudicotyledons | Asteraceae    | <i>Sinosenecio</i>    | <i>Sinosenecio homogyniphyllus</i> | JN047161 |
| Eudicotyledons | Asteraceae    | <i>Sinosenecio</i>    | <i>Sinosenecio homogyniphyllus</i> | JN047162 |
| Eudicotyledons | Asteraceae    | <i>Sinosenecio</i>    | <i>Sinosenecio homogyniphyllus</i> | JN047163 |
| Eudicotyledons | Caryocaraceae | <i>Caryocar</i>       | <i>Caryocar brasiliense</i>        | EU350258 |
| Eudicotyledons | Caryocaraceae | <i>Caryocar</i>       | <i>Caryocar brasiliense</i>        | EU350259 |
| Eudicotyledons | Caryocaraceae | <i>Caryocar</i>       | <i>Caryocar brasiliense</i>        | EU350260 |
| Eudicotyledons | Caryocaraceae | <i>Caryocar</i>       | <i>Caryocar brasiliense</i>        | EU350261 |
| Eudicotyledons | Caryocaraceae | <i>Caryocar</i>       | <i>Caryocar brasiliense</i>        | EU350262 |
| Eudicotyledons | Caryocaraceae | <i>Caryocar</i>       | <i>Caryocar brasiliense</i>        | EU350263 |
| Eudicotyledons | Caryocaraceae | <i>Caryocar</i>       | <i>Caryocar brasiliense</i>        | EU350264 |
| Eudicotyledons | Caryocaraceae | <i>Caryocar</i>       | <i>Caryocar brasiliense</i>        | EU350265 |
| Eudicotyledons | Caryocaraceae | <i>Caryocar</i>       | <i>Caryocar brasiliense</i>        | EU350266 |
| Eudicotyledons | Caryocaraceae | <i>Caryocar</i>       | <i>Caryocar brasiliense</i>        | EU350267 |
| Eudicotyledons | Asteraceae    | <i>Symphyotrichum</i> | <i>Symphyotrichum ericoides</i>    | EU750581 |
| Eudicotyledons | Asteraceae    | <i>Symphyotrichum</i> | <i>Symphyotrichum ericoides</i>    | EU750582 |
| Eudicotyledons | Combretaceae  | <i>Combretum</i>      | <i>Combretum apiculatum</i>        | EU213794 |
| Eudicotyledons | Combretaceae  | <i>Combretum</i>      | <i>Combretum apiculatum</i>        | EU213795 |
| Eudicotyledons | Combretaceae  | <i>Combretum</i>      | <i>Combretum apiculatum</i>        | EU213796 |
| Eudicotyledons | Combretaceae  | <i>Combretum</i>      | <i>Combretum collinum</i>          | EU213797 |
| Eudicotyledons | Combretaceae  | <i>Combretum</i>      | <i>Combretum collinum</i>          | EU213798 |
| Eudicotyledons | Combretaceae  | <i>Combretum</i>      | <i>Combretum collinum</i>          | EU213799 |
| Eudicotyledons | Combretaceae  | <i>Combretum</i>      | <i>Combretum hereroense</i>        | EU338193 |
| Eudicotyledons | Combretaceae  | <i>Combretum</i>      | <i>Combretum hereroense</i>        | EU213800 |
| Eudicotyledons | Combretaceae  | <i>Combretum</i>      | <i>Combretum hereroense</i>        | EU213801 |
| Eudicotyledons | Combretaceae  | <i>Combretum</i>      | <i>Combretum hereroense</i>        | EU213802 |
| Eudicotyledons | Malvaceae     | <i>Grewia</i>         | <i>Grewia bicolor</i>              | EU213828 |
| Eudicotyledons | Malvaceae     | <i>Grewia</i>         | <i>Grewia bicolor</i>              | EU213829 |
| Eudicotyledons | Malvaceae     | <i>Grewia</i>         | <i>Grewia bicolor</i>              | EU213830 |





|                |                  |                       |                                    |          |
|----------------|------------------|-----------------------|------------------------------------|----------|
| Eudicotyledons | Asteraceae       | <i>Symphyotrichum</i> | <i>Symphyotrichum ciliolatum</i>   | EU750580 |
| Eudicotyledons | Asteraceae       | <i>Symphyotrichum</i> | <i>Symphyotrichum lanceolatum</i>  | EU750583 |
| Eudicotyledons | Asteraceae       | <i>Symphyotrichum</i> | <i>Symphyotrichum lanceolatum</i>  | EU750584 |
| Eudicotyledons | Asteraceae       | <i>Symphyotrichum</i> | <i>Symphyotrichum lateriflorum</i> | EU750585 |
| Eudicotyledons | Asteraceae       | <i>Symphyotrichum</i> | <i>Symphyotrichum lateriflorum</i> | EU750586 |
| Eudicotyledons | Asteraceae       | <i>Symphyotrichum</i> | <i>Symphyotrichum lateriflorum</i> | EU750587 |
| Eudicotyledons | Asteraceae       | <i>Symphyotrichum</i> | <i>Symphyotrichum lateriflorum</i> | EU750588 |
| Eudicotyledons | Asteraceae       | <i>Symphyotrichum</i> | <i>Symphyotrichum pilosum</i>      | EU750593 |
| Eudicotyledons | Asteraceae       | <i>Symphyotrichum</i> | <i>Symphyotrichum pilosum</i>      | EU750594 |
| Eudicotyledons | Asteraceae       | <i>Symphyotrichum</i> | <i>Symphyotrichum urophyllum</i>   | EU750595 |
| Eudicotyledons | Asteraceae       | <i>Symphyotrichum</i> | <i>Symphyotrichum urophyllum</i>   | EU750596 |
| Eudicotyledons | Asteraceae       | <i>Symphyotrichum</i> | <i>Symphyotrichum puniceum</i>     | HQ596858 |
| Eudicotyledons | Asteraceae       | <i>Symphyotrichum</i> | <i>Symphyotrichum puniceum</i>     | HQ596859 |
| Eudicotyledons | Asteraceae       | <i>Anthemis</i>       | <i>Anthemis cupaniana</i>          | FR689891 |
| Eudicotyledons | Asteraceae       | <i>Anthemis</i>       | <i>Anthemis cupaniana</i>          | FR689901 |
| Eudicotyledons | Asteraceae       | <i>Anthemis</i>       | <i>Anthemis yemensis</i>           | FR689841 |
| Eudicotyledons | Asteraceae       | <i>Anthemis</i>       | <i>Anthemis yemensis</i>           | FR689892 |
| Eudicotyledons | Apocynaceae      | <i>Aspidosperma</i>   | <i>Aspidosperma marcgravianum</i>  | FJ038857 |
| Eudicotyledons | Apocynaceae      | <i>Aspidosperma</i>   | <i>Aspidosperma marcgravianum</i>  | FJ038858 |
| Eudicotyledons | Boraginaceae     | <i>Cordia</i>         | <i>Cordia sagotii</i>              | FJ038862 |
| Eudicotyledons | Boraginaceae     | <i>Cordia</i>         | <i>Cordia sagotii</i>              | FJ038863 |
| Eudicotyledons | Boraginaceae     | <i>Cordia</i>         | <i>Cordia sagotii</i>              | FJ038864 |
| Eudicotyledons | Chrysobalanaceae | <i>Couepia</i>        | <i>Couepia bracteosa</i>           | FJ038891 |
| Eudicotyledons | Chrysobalanaceae | <i>Couepia</i>        | <i>Couepia bracteosa</i>           | FJ038892 |
| Eudicotyledons | Chrysobalanaceae | <i>Couepia</i>        | <i>Couepia guianensis</i>          | FJ038889 |
| Eudicotyledons | Chrysobalanaceae | <i>Couepia</i>        | <i>Couepia guianensis</i>          | FJ038890 |
| Eudicotyledons | Sapotaceae       | <i>Pouteria</i>       | <i>Pouteria decorticans</i>        | FJ039069 |
| Eudicotyledons | Sapotaceae       | <i>Pouteria</i>       | <i>Pouteria decorticans</i>        | FJ039070 |
| Eudicotyledons | Sapotaceae       | <i>Pouteria</i>       | <i>Pouteria decorticans</i>        | FJ039071 |
| Eudicotyledons | Sapotaceae       | <i>Pouteria</i>       | <i>Pouteria decorticans</i>        | FJ039072 |
| Eudicotyledons | Sapotaceae       | <i>Pouteria</i>       | <i>Pouteria filipes</i>            | GQ428714 |
| Eudicotyledons | Sapotaceae       | <i>Pouteria</i>       | <i>Pouteria filipes</i>            | FJ039076 |
| Eudicotyledons | Sapotaceae       | <i>Pouteria</i>       | <i>Pouteria gongrijpii</i>         | FJ039073 |
| Eudicotyledons | Sapotaceae       | <i>Pouteria</i>       | <i>Pouteria gongrijpii</i>         | FJ039074 |
| Eudicotyledons | Sapotaceae       | <i>Pouteria</i>       | <i>Pouteria sp. MAG-2009</i>       | FJ039077 |
| Eudicotyledons | Sapotaceae       | <i>Pouteria</i>       | <i>Pouteria sp. MAG-2009</i>       | FJ039078 |
| Eudicotyledons | Sapotaceae       | <i>Pouteria</i>       | <i>Pouteria sp. MAG-2009</i>       | FJ039080 |
| Eudicotyledons | Thymelaeaceae    | <i>Daphne</i>         | <i>Daphne blagayana</i>            | GQ167433 |
| Eudicotyledons | Thymelaeaceae    | <i>Daphne</i>         | <i>Daphne blagayana</i>            | GQ167434 |
| Eudicotyledons | Thymelaeaceae    | <i>Daphne</i>         | <i>Daphne rodriguezii</i>          | GQ167489 |
| Eudicotyledons | Thymelaeaceae    | <i>Daphne</i>         | <i>Daphne rodriguezii</i>          | GQ167490 |
| Eudicotyledons | Asteraceae       | <i>Pityopsis</i>      | <i>Pityopsis aspera</i>            | GQ892627 |
| Eudicotyledons | Asteraceae       | <i>Pityopsis</i>      | <i>Pityopsis aspera</i>            | GQ892628 |
| Eudicotyledons | Asteraceae       | <i>Pityopsis</i>      | <i>Pityopsis falcata</i>           | GQ892616 |
| Eudicotyledons | Asteraceae       | <i>Pityopsis</i>      | <i>Pityopsis falcata</i>           | GQ892617 |
| Eudicotyledons | Asteraceae       | <i>Pityopsis</i>      | <i>Pityopsis falcata</i>           | GQ892618 |
| Eudicotyledons | Asteraceae       | <i>Pityopsis</i>      | <i>Pityopsis oligantha</i>         | GQ892625 |
| Eudicotyledons | Asteraceae       | <i>Pityopsis</i>      | <i>Pityopsis oligantha</i>         | GQ892626 |
| Eudicotyledons | Asteraceae       | <i>Pityopsis</i>      | <i>Pityopsis pinifolia</i>         | GQ892619 |
| Eudicotyledons | Asteraceae       | <i>Pityopsis</i>      | <i>Pityopsis pinifolia</i>         | GQ892620 |
| Eudicotyledons | Asteraceae       | <i>Pityopsis</i>      | <i>Pityopsis pinifolia</i>         | GQ892621 |
| Eudicotyledons | Asteraceae       | <i>Pityopsis</i>      | <i>Pityopsis ruthii</i>            | GQ892622 |
| Eudicotyledons | Asteraceae       | <i>Pityopsis</i>      | <i>Pityopsis ruthii</i>            | GQ892623 |

|                |               |                     |                                 |          |
|----------------|---------------|---------------------|---------------------------------|----------|
| Eudicotyledons | Apocynaceae   | <i>Aspidosperma</i> | <i>Aspidosperma spruceanum</i>  | GQ428748 |
| Eudicotyledons | Apocynaceae   | <i>Aspidosperma</i> | <i>Aspidosperma spruceanum</i>  | GQ982153 |
| Eudicotyledons | Asteraceae    | <i>Chaetosaris</i>  | <i>Chaetosaris cyanea</i>       | GU109326 |
| Eudicotyledons | Asteraceae    | <i>Chaetosaris</i>  | <i>Chaetosaris cyanea</i>       | GU109329 |
| Eudicotyledons | Malvaceae     | <i>Alcea</i>        | <i>Alcea acaulis</i>            | GU166773 |
| Eudicotyledons | Malvaceae     | <i>Alcea</i>        | <i>Alcea acaulis</i>            | GU166774 |
| Eudicotyledons | Malvaceae     | <i>Alcea</i>        | <i>Alcea apterocarpa</i>        | GU166777 |
| Eudicotyledons | Malvaceae     | <i>Alcea</i>        | <i>Alcea apterocarpa</i>        | GU166778 |
| Eudicotyledons | Malvaceae     | <i>Alcea</i>        | <i>Alcea hohenackeri</i>        | GU166783 |
| Eudicotyledons | Malvaceae     | <i>Alcea</i>        | <i>Alcea hohenackeri</i>        | GU166784 |
| Eudicotyledons | Malvaceae     | <i>Alcea</i>        | <i>Alcea lavateriflora</i>      | GU166785 |
| Eudicotyledons | Malvaceae     | <i>Alcea</i>        | <i>Alcea lavateriflora</i>      | GU166786 |
| Eudicotyledons | Malvaceae     | <i>Alcea</i>        | <i>Alcea rufescens</i>          | GU166789 |
| Eudicotyledons | Malvaceae     | <i>Alcea</i>        | <i>Alcea rufescens</i>          | GU166790 |
| Eudicotyledons | Orobanchaceae | <i>Pterygiella</i>  | <i>Pterygiella cylindrica</i>   | JN416386 |
| Eudicotyledons | Orobanchaceae | <i>Pterygiella</i>  | <i>Pterygiella cylindrica</i>   | JN416387 |
| Eudicotyledons | Orobanchaceae | <i>Pterygiella</i>  | <i>Pterygiella cylindrica</i>   | JN416388 |
| Eudicotyledons | Orobanchaceae | <i>Pterygiella</i>  | <i>Pterygiella cylindrica</i>   | JN046672 |
| Eudicotyledons | Orobanchaceae | <i>Pterygiella</i>  | <i>Pterygiella cylindrica</i>   | JN046673 |
| Eudicotyledons | Orobanchaceae | <i>Pterygiella</i>  | <i>Pterygiella cylindrica</i>   | JN046674 |
| Eudicotyledons | Orobanchaceae | <i>Pterygiella</i>  | <i>Pterygiella duclouxii</i>    | JN416389 |
| Eudicotyledons | Orobanchaceae | <i>Pterygiella</i>  | <i>Pterygiella duclouxii</i>    | JN416390 |
| Eudicotyledons | Orobanchaceae | <i>Pterygiella</i>  | <i>Pterygiella duclouxii</i>    | JN416391 |
| Eudicotyledons | Orobanchaceae | <i>Pterygiella</i>  | <i>Pterygiella duclouxii</i>    | JN416392 |
| Eudicotyledons | Orobanchaceae | <i>Pterygiella</i>  | <i>Pterygiella duclouxii</i>    | JN416393 |
| Eudicotyledons | Orobanchaceae | <i>Pterygiella</i>  | <i>Pterygiella duclouxii</i>    | JN416394 |
| Eudicotyledons | Orobanchaceae | <i>Pterygiella</i>  | <i>Pterygiella duclouxii</i>    | JN416395 |
| Eudicotyledons | Orobanchaceae | <i>Pterygiella</i>  | <i>Pterygiella duclouxii</i>    | JN416396 |
| Eudicotyledons | Orobanchaceae | <i>Pterygiella</i>  | <i>Pterygiella duclouxii</i>    | JN416397 |
| Eudicotyledons | Orobanchaceae | <i>Pterygiella</i>  | <i>Pterygiella duclouxii</i>    | JN416398 |
| Eudicotyledons | Orobanchaceae | <i>Pterygiella</i>  | <i>Pterygiella duclouxii</i>    | JN416399 |
| Eudicotyledons | Orobanchaceae | <i>Pterygiella</i>  | <i>Pterygiella duclouxii</i>    | JN416400 |
| Eudicotyledons | Orobanchaceae | <i>Pterygiella</i>  | <i>Pterygiella duclouxii</i>    | JN416401 |
| Eudicotyledons | Orobanchaceae | <i>Pterygiella</i>  | <i>Pterygiella duclouxii</i>    | JN416402 |
| Eudicotyledons | Orobanchaceae | <i>Pterygiella</i>  | <i>Pterygiella duclouxii</i>    | JN416403 |
| Eudicotyledons | Orobanchaceae | <i>Pterygiella</i>  | <i>Pterygiella duclouxii</i>    | JN416404 |
| Eudicotyledons | Orobanchaceae | <i>Pterygiella</i>  | <i>Pterygiella duclouxii</i>    | JN416405 |
| Eudicotyledons | Orobanchaceae | <i>Pterygiella</i>  | <i>Pterygiella duclouxii</i>    | JN416406 |
| Eudicotyledons | Orobanchaceae | <i>Pterygiella</i>  | <i>Pterygiella duclouxii</i>    | JN416407 |
| Eudicotyledons | Orobanchaceae | <i>Pterygiella</i>  | <i>Pterygiella duclouxii</i>    | JN416408 |
| Eudicotyledons | Orobanchaceae | <i>Pterygiella</i>  | <i>Pterygiella duclouxii</i>    | JN416409 |
| Eudicotyledons | Orobanchaceae | <i>Pterygiella</i>  | <i>Pterygiella duclouxii</i>    | JN046675 |
| Eudicotyledons | Orobanchaceae | <i>Pterygiella</i>  | <i>Pterygiella duclouxii</i>    | JN046676 |
| Eudicotyledons | Orobanchaceae | <i>Pterygiella</i>  | <i>Pterygiella duclouxii</i>    | JN046677 |
| Eudicotyledons | Orobanchaceae | <i>Pterygiella</i>  | <i>Pterygiella duclouxii</i>    | JN046678 |
| Eudicotyledons | Orobanchaceae | <i>Pterygiella</i>  | <i>Pterygiella duclouxii</i>    | JN046679 |
| Eudicotyledons | Orobanchaceae | <i>Pterygiella</i>  | <i>Pterygiella duclouxii</i>    | JN046680 |
| Eudicotyledons | Orobanchaceae | <i>Pterygiella</i>  | <i>Pterygiella nigrescens</i>   | JN416410 |
| Eudicotyledons | Orobanchaceae | <i>Pterygiella</i>  | <i>Pterygiella nigrescens</i>   | JN416411 |
| Eudicotyledons | Orobanchaceae | <i>Pterygiella</i>  | <i>Pterygiella nigrescens</i>   | JN046681 |
| Eudicotyledons | Orobanchaceae | <i>Pterygiella</i>  | <i>Pterygiella nigrescens</i>   | JN046682 |
| Eudicotyledons | Orobanchaceae | <i>Pterygiella</i>  | <i>Pterygiella nigrescens</i>   | JN046683 |
| Eudicotyledons | Orobanchaceae | <i>Pterygiella</i>  | <i>Pterygiella suffruticosa</i> | JN416412 |



|                |               |                     |                                 |          |
|----------------|---------------|---------------------|---------------------------------|----------|
| Eudicotyledons | Orobanchaceae | <i>Pterygiella</i>  | <i>Pterygiella suffruticosa</i> | JN416413 |
| Eudicotyledons | Orobanchaceae | <i>Pterygiella</i>  | <i>Pterygiella suffruticosa</i> | JN416414 |
| Eudicotyledons | Orobanchaceae | <i>Pterygiella</i>  | <i>Pterygiella suffruticosa</i> | JN416415 |
| Eudicotyledons | Orobanchaceae | <i>Pterygiella</i>  | <i>Pterygiella suffruticosa</i> | JN046684 |
| Eudicotyledons | Orobanchaceae | <i>Pterygiella</i>  | <i>Pterygiella suffruticosa</i> | JN046685 |
| Eudicotyledons | Orobanchaceae | <i>Pterygiella</i>  | <i>Pterygiella suffruticosa</i> | JN046686 |
| Eudicotyledons | Orobanchaceae | <i>Pterygiella</i>  | <i>Pterygiella suffruticosa</i> | JN046687 |
| Eudicotyledons | Orobanchaceae | <i>Pterygiella</i>  | <i>Pterygiella suffruticosa</i> | JN046688 |
| Eudicotyledons | Asteraceae    | <i>Nabalus</i>      | <i>Nabalus alatus</i>           | HQ162026 |
| Eudicotyledons | Asteraceae    | <i>Nabalus</i>      | <i>Nabalus alatus</i>           | HQ162027 |
| Eudicotyledons | Asteraceae    | <i>Nabalus</i>      | <i>Nabalus asper</i>            | HQ162020 |
| Eudicotyledons | Asteraceae    | <i>Nabalus</i>      | <i>Nabalus asper</i>            | HQ162021 |
| Eudicotyledons | Asteraceae    | <i>Nabalus</i>      | <i>Nabalus asper</i>            | HQ162025 |
| Eudicotyledons | Asteraceae    | <i>Nabalus</i>      | <i>Nabalus barbatus</i>         | HQ162011 |
| Eudicotyledons | Asteraceae    | <i>Nabalus</i>      | <i>Nabalus barbatus</i>         | HQ162023 |
| Eudicotyledons | Asteraceae    | <i>Nabalus</i>      | <i>Nabalus barbatus</i>         | HQ162024 |
| Eudicotyledons | Asteraceae    | <i>Nabalus</i>      | <i>Nabalus racemosus</i>        | HQ162022 |
| Eudicotyledons | Asteraceae    | <i>Nabalus</i>      | <i>Nabalus racemosus</i>        | HQ162030 |
| Eudicotyledons | Asteraceae    | <i>Nabalus</i>      | <i>Nabalus roanensis</i>        | HQ162015 |
| Eudicotyledons | Asteraceae    | <i>Nabalus</i>      | <i>Nabalus roanensis</i>        | HQ162016 |
| Eudicotyledons | Cactaceae     | <i>Pilosocereus</i> | <i>Pilosocereus machrisii</i>   | JN035466 |
| Eudicotyledons | Cactaceae     | <i>Pilosocereus</i> | <i>Pilosocereus machrisii</i>   | JN035467 |
| Eudicotyledons | Cactaceae     | <i>Pilosocereus</i> | <i>Pilosocereus machrisii</i>   | JN035468 |
| Eudicotyledons | Cactaceae     | <i>Pilosocereus</i> | <i>Pilosocereus machrisii</i>   | JN035469 |
| Eudicotyledons | Cactaceae     | <i>Pilosocereus</i> | <i>Pilosocereus machrisii</i>   | JN035470 |
| Eudicotyledons | Cactaceae     | <i>Pilosocereus</i> | <i>Pilosocereus machrisii</i>   | JN035471 |
| Eudicotyledons | Cactaceae     | <i>Pilosocereus</i> | <i>Pilosocereus machrisii</i>   | JN035472 |
| Eudicotyledons | Cactaceae     | <i>Pilosocereus</i> | <i>Pilosocereus machrisii</i>   | JN035473 |
| Eudicotyledons | Cactaceae     | <i>Pilosocereus</i> | <i>Pilosocereus machrisii</i>   | JN035474 |
| Eudicotyledons | Cactaceae     | <i>Pilosocereus</i> | <i>Pilosocereus machrisii</i>   | JN035475 |
| Eudicotyledons | Cactaceae     | <i>Pilosocereus</i> | <i>Pilosocereus machrisii</i>   | JN035476 |
| Eudicotyledons | Cactaceae     | <i>Pilosocereus</i> | <i>Pilosocereus machrisii</i>   | JN035477 |
| Eudicotyledons | Cactaceae     | <i>Pilosocereus</i> | <i>Pilosocereus machrisii</i>   | JN035478 |
| Eudicotyledons | Cactaceae     | <i>Pilosocereus</i> | <i>Pilosocereus machrisii</i>   | JN035479 |
| Eudicotyledons | Cactaceae     | <i>Pilosocereus</i> | <i>Pilosocereus machrisii</i>   | JN035480 |
| Eudicotyledons | Cactaceae     | <i>Pilosocereus</i> | <i>Pilosocereus machrisii</i>   | JN035491 |
| Eudicotyledons | Cactaceae     | <i>Pilosocereus</i> | <i>Pilosocereus machrisii</i>   | JN035492 |
| Eudicotyledons | Cactaceae     | <i>Pilosocereus</i> | <i>Pilosocereus machrisii</i>   | JN035493 |
| Eudicotyledons | Cactaceae     | <i>Pilosocereus</i> | <i>Pilosocereus machrisii</i>   | JN035494 |
| Eudicotyledons | Cactaceae     | <i>Pilosocereus</i> | <i>Pilosocereus machrisii</i>   | JN035495 |
| Eudicotyledons | Cactaceae     | <i>Pilosocereus</i> | <i>Pilosocereus machrisii</i>   | JN035496 |
| Eudicotyledons | Cactaceae     | <i>Pilosocereus</i> | <i>Pilosocereus machrisii</i>   | JN035497 |
| Eudicotyledons | Cactaceae     | <i>Pilosocereus</i> | <i>Pilosocereus machrisii</i>   | JN035498 |
| Eudicotyledons | Cactaceae     | <i>Pilosocereus</i> | <i>Pilosocereus machrisii</i>   | JN035499 |
| Eudicotyledons | Cactaceae     | <i>Pilosocereus</i> | <i>Pilosocereus machrisii</i>   | JN035500 |
| Eudicotyledons | Cactaceae     | <i>Pilosocereus</i> | <i>Pilosocereus machrisii</i>   | JN035501 |
| Eudicotyledons | Cactaceae     | <i>Pilosocereus</i> | <i>Pilosocereus machrisii</i>   | JN035502 |
| Eudicotyledons | Cactaceae     | <i>Pilosocereus</i> | <i>Pilosocereus machrisii</i>   | JN035503 |
| Eudicotyledons | Rutaceae      | <i>Spathelia</i>    | <i>Spathelia sorbifolia</i>     | FR747986 |
| Eudicotyledons | Rutaceae      | <i>Spathelia</i>    | <i>Spathelia sorbifolia</i>     | FR747989 |
| Eudicotyledons | Rutaceae      | <i>Spathelia</i>    | <i>Spathelia splendens</i>      | FR747991 |
| Eudicotyledons | Rutaceae      | <i>Spathelia</i>    | <i>Spathelia splendens</i>      | FR747995 |
| Eudicotyledons | Rutaceae      | <i>Spathelia</i>    | <i>Spathelia splendens</i>      | FR747998 |

|                |              |                     |                                    |          |
|----------------|--------------|---------------------|------------------------------------|----------|
| Eudicotyledons | Rutaceae     | <i>Spathelia</i>    | <i>Spathelia wrightii</i>          | FR747992 |
| Eudicotyledons | Rutaceae     | <i>Spathelia</i>    | <i>Spathelia wrightii</i>          | FR747999 |
| Eudicotyledons | Rutaceae     | <i>Spathelia</i>    | <i>Spathelia wrightii</i>          | FR748000 |
| Eudicotyledons | Rutaceae     | <i>Spathelia</i>    | <i>Spathelia vernicosa</i>         | FR747996 |
| Eudicotyledons | Rutaceae     | <i>Spathelia</i>    | <i>Spathelia vernicosa</i>         | FR747997 |
| Eudicotyledons | Rutaceae     | <i>Spathelia</i>    | <i>Spathelia vernicosa</i>         | FR748001 |
| Eudicotyledons | Malvaceae    | <i>Malva</i>        | <i>Malva excisa</i>                | HM214506 |
| Eudicotyledons | Malvaceae    | <i>Malva</i>        | <i>Malva excisa</i>                | HM214507 |
| Eudicotyledons | Malvaceae    | <i>Malva</i>        | <i>Malva excisa</i>                | HM214508 |
| Eudicotyledons | Malvaceae    | <i>Malva</i>        | <i>Malva excisa</i>                | HM214509 |
| Eudicotyledons | Malvaceae    | <i>Malva</i>        | <i>Malva excisa</i>                | HM214510 |
| Eudicotyledons | Malvaceae    | <i>Malva</i>        | <i>Malva excisa</i>                | HM214511 |
| Eudicotyledons | Malvaceae    | <i>Malva</i>        | <i>Malva excisa</i>                | HM214512 |
| Eudicotyledons | Asteraceae   | <i>Chaetoseris</i>  | <i>Chaetoseris grandiflora</i>     | HQ436157 |
| Eudicotyledons | Asteraceae   | <i>Chaetoseris</i>  | <i>Chaetoseris grandiflora</i>     | HQ436158 |
| Eudicotyledons | Asteraceae   | <i>Syncalathium</i> | <i>Syncalathium chrysocephalum</i> | HQ436166 |
| Eudicotyledons | Asteraceae   | <i>Syncalathium</i> | <i>Syncalathium chrysocephalum</i> | JN047303 |
| Eudicotyledons | Asteraceae   | <i>Syncalathium</i> | <i>Syncalathium chrysocephalum</i> | JN047304 |
| Eudicotyledons | Asteraceae   | <i>Syncalathium</i> | <i>Syncalathium chrysocephalum</i> | JN047305 |
| Eudicotyledons | Asteraceae   | <i>Syncalathium</i> | <i>Syncalathium disciforme</i>     | HQ436167 |
| Eudicotyledons | Asteraceae   | <i>Syncalathium</i> | <i>Syncalathium disciforme</i>     | JN047306 |
| Eudicotyledons | Asteraceae   | <i>Syncalathium</i> | <i>Syncalathium disciforme</i>     | JN047307 |
| Eudicotyledons | Asteraceae   | <i>Syncalathium</i> | <i>Syncalathium disciforme</i>     | JN047308 |
| Eudicotyledons | Asteraceae   | <i>Syncalathium</i> | <i>Syncalathium kawaguchii</i>     | HQ436168 |
| Eudicotyledons | Asteraceae   | <i>Syncalathium</i> | <i>Syncalathium kawaguchii</i>     | JN047309 |
| Eudicotyledons | Asteraceae   | <i>Syncalathium</i> | <i>Syncalathium kawaguchii</i>     | JN047310 |
| Eudicotyledons | Asteraceae   | <i>Syncalathium</i> | <i>Syncalathium kawaguchii</i>     | JN047311 |
| Eudicotyledons | Asteraceae   | <i>Syncalathium</i> | <i>Syncalathium pilosum</i>        | HQ436169 |
| Eudicotyledons | Asteraceae   | <i>Syncalathium</i> | <i>Syncalathium pilosum</i>        | JN047312 |
| Eudicotyledons | Asteraceae   | <i>Syncalathium</i> | <i>Syncalathium qinghaiense</i>    | HQ436170 |
| Eudicotyledons | Asteraceae   | <i>Syncalathium</i> | <i>Syncalathium qinghaiense</i>    | HQ436171 |
| Eudicotyledons | Asteraceae   | <i>Syncalathium</i> | <i>Syncalathium roseum</i>         | HQ436172 |
| Eudicotyledons | Asteraceae   | <i>Syncalathium</i> | <i>Syncalathium roseum</i>         | JN047313 |
| Eudicotyledons | Asteraceae   | <i>Syncalathium</i> | <i>Syncalathium souliei</i>        | HQ436173 |
| Eudicotyledons | Asteraceae   | <i>Syncalathium</i> | <i>Syncalathium souliei</i>        | HQ436174 |
| Eudicotyledons | Asteraceae   | <i>Syncalathium</i> | <i>Syncalathium souliei</i>        | HQ436175 |
| Eudicotyledons | Asteraceae   | <i>Syncalathium</i> | <i>Syncalathium souliei</i>        | HQ436176 |
| Eudicotyledons | Asteraceae   | <i>Syncalathium</i> | <i>Syncalathium souliei</i>        | HQ436177 |
| Eudicotyledons | Asteraceae   | <i>Syncalathium</i> | <i>Syncalathium souliei</i>        | HQ436178 |
| Eudicotyledons | Asteraceae   | <i>Nabalus</i>      | <i>Nabalus tatarinowii</i>         | HQ436162 |
| Eudicotyledons | Asteraceae   | <i>Nabalus</i>      | <i>Nabalus tatarinowii</i>         | HQ436163 |
| Eudicotyledons | Loranthaceae | <i>Helixanthera</i> | <i>Helixanthera sampsonii</i>      | HQ317806 |
| Eudicotyledons | Loranthaceae | <i>Helixanthera</i> | <i>Helixanthera sampsonii</i>      | HQ317807 |
| Eudicotyledons | Asteraceae   | <i>Sinosenecio</i>  | <i>Sinosenecio sp. DZL-2011</i>    | JN047126 |
| Eudicotyledons | Asteraceae   | <i>Sinosenecio</i>  | <i>Sinosenecio sp. DZL-2011</i>    | JN047127 |
| Eudicotyledons | Asteraceae   | <i>Sinosenecio</i>  | <i>Sinosenecio sp. DZL-2011</i>    | JN047128 |
| Eudicotyledons | Asteraceae   | <i>Sinosenecio</i>  | <i>Sinosenecio cyclaminifolius</i> | JN047133 |
| Eudicotyledons | Asteraceae   | <i>Sinosenecio</i>  | <i>Sinosenecio cyclaminifolius</i> | JN047134 |
| Eudicotyledons | Asteraceae   | <i>Sinosenecio</i>  | <i>Sinosenecio cyclaminifolius</i> | JN047135 |
| Eudicotyledons | Asteraceae   | <i>Sinosenecio</i>  | <i>Sinosenecio dryas</i>           | JN047140 |
| Eudicotyledons | Asteraceae   | <i>Sinosenecio</i>  | <i>Sinosenecio dryas</i>           | JN047141 |
| Eudicotyledons | Asteraceae   | <i>Sinosenecio</i>  | <i>Sinosenecio dryas</i>           | JN047142 |
| Eudicotyledons | Asteraceae   | <i>Sinosenecio</i>  | <i>Sinosenecio jiuhuashanicus</i>  | JN047164 |

|                |                |                     |                                   |          |
|----------------|----------------|---------------------|-----------------------------------|----------|
| Eudicotyledons | Asteraceae     | <i>Sinosenecio</i>  | <i>Sinosenecio jiuhuashanicus</i> | JN047165 |
| Eudicotyledons | Asteraceae     | <i>Sinosenecio</i>  | <i>Sinosenecio jiuhuashanicus</i> | JN047166 |
| Eudicotyledons | Asteraceae     | <i>Sinosenecio</i>  | <i>Sinosenecio latouchei</i>      | JN047170 |
| Eudicotyledons | Asteraceae     | <i>Sinosenecio</i>  | <i>Sinosenecio latouchei</i>      | JN047171 |
| Eudicotyledons | Asteraceae     | <i>Sinosenecio</i>  | <i>Sinosenecio latouchei</i>      | JN047172 |
| Eudicotyledons | Asteraceae     | <i>Sinosenecio</i>  | <i>Sinosenecio latouchei</i>      | JN047173 |
| Eudicotyledons | Asteraceae     | <i>Sinosenecio</i>  | <i>Sinosenecio ligularioides</i>  | JN047174 |
| Eudicotyledons | Asteraceae     | <i>Sinosenecio</i>  | <i>Sinosenecio ligularioides</i>  | JN047175 |
| Eudicotyledons | Asteraceae     | <i>Sinosenecio</i>  | <i>Sinosenecio ligularioides</i>  | JN047176 |
| Eudicotyledons | Asteraceae     | <i>Sinosenecio</i>  | <i>Sinosenecio palmatisectus</i>  | JN047180 |
| Eudicotyledons | Asteraceae     | <i>Sinosenecio</i>  | <i>Sinosenecio palmatisectus</i>  | JN047181 |
| Eudicotyledons | Asteraceae     | <i>Sinosenecio</i>  | <i>Sinosenecio sichuanicus</i>    | JN047188 |
| Eudicotyledons | Asteraceae     | <i>Sinosenecio</i>  | <i>Sinosenecio sichuanicus</i>    | JN047189 |
| Eudicotyledons | Asteraceae     | <i>Sinosenecio</i>  | <i>Sinosenecio subrosulatus</i>   | JN047194 |
| Eudicotyledons | Asteraceae     | <i>Sinosenecio</i>  | <i>Sinosenecio subrosulatus</i>   | JN047195 |
| Eudicotyledons | Asteraceae     | <i>Sinosenecio</i>  | <i>Sinosenecio sungpanensis</i>   | JN047196 |
| Eudicotyledons | Asteraceae     | <i>Sinosenecio</i>  | <i>Sinosenecio sungpanensis</i>   | JN047197 |
| Eudicotyledons | Asteraceae     | <i>Sinosenecio</i>  | <i>Sinosenecio villifer</i>       | JN047198 |
| Eudicotyledons | Asteraceae     | <i>Sinosenecio</i>  | <i>Sinosenecio villifer</i>       | JN047199 |
| Eudicotyledons | Asteraceae     | <i>Sinosenecio</i>  | <i>Sinosenecio villifer</i>       | JN047200 |
| Eudicotyledons | Asteraceae     | <i>Sinosenecio</i>  | <i>Sinosenecio yilingii</i>       | JN047201 |
| Eudicotyledons | Asteraceae     | <i>Sinosenecio</i>  | <i>Sinosenecio yilingii</i>       | JN047202 |
| Eudicotyledons | Asteraceae     | <i>Sinosenecio</i>  | <i>Sinosenecio yilingii</i>       | JN047203 |
| Eudicotyledons | Zygophyllaceae | <i>Zygophyllum</i>  | <i>Zygophyllum brachypterum</i>   | JN047531 |
| Eudicotyledons | Zygophyllaceae | <i>Zygophyllum</i>  | <i>Zygophyllum brachypterum</i>   | JN047532 |
| Eudicotyledons | Zygophyllaceae | <i>Zygophyllum</i>  | <i>Zygophyllum macropodum</i>     | JN047536 |
| Eudicotyledons | Zygophyllaceae | <i>Zygophyllum</i>  | <i>Zygophyllum macropodum</i>     | JN047537 |
| Eudicotyledons | Zygophyllaceae | <i>Zygophyllum</i>  | <i>Zygophyllum obliquum</i>       | JN047538 |
| Eudicotyledons | Zygophyllaceae | <i>Zygophyllum</i>  | <i>Zygophyllum obliquum</i>       | JN047539 |
| Eudicotyledons | Betulaceae     | <i>Ostryopsis</i>   | <i>Ostryopsis intermedia</i>      | JN045680 |
| Eudicotyledons | Betulaceae     | <i>Ostryopsis</i>   | <i>Ostryopsis intermedia</i>      | JN045681 |
| Eudicotyledons | Betulaceae     | <i>Ostryopsis</i>   | <i>Ostryopsis intermedia</i>      | JN045682 |
| Eudicotyledons | Betulaceae     | <i>Ostryopsis</i>   | <i>Ostryopsis intermedia</i>      | JN045683 |
| Eudicotyledons | Betulaceae     | <i>Ostryopsis</i>   | <i>Ostryopsis intermedia</i>      | JN045684 |
| Eudicotyledons | Asteraceae     | <i>Sinosenecio</i>  | <i>Sinosenecio palmatilobus</i>   | JN047182 |
| Eudicotyledons | Asteraceae     | <i>Sinosenecio</i>  | <i>Sinosenecio palmatilobus</i>   | JN047183 |
| Eudicotyledons | Asteraceae     | <i>Sinosenecio</i>  | <i>Sinosenecio palmatilobus</i>   | JN047184 |
| Eudicotyledons | Cactaceae      | <i>Pilosocereus</i> | <i>Pilosocereus aureispinus</i>   | JN035509 |
| Eudicotyledons | Cactaceae      | <i>Pilosocereus</i> | <i>Pilosocereus aureispinus</i>   | JN035510 |
| Eudicotyledons | Cactaceae      | <i>Pilosocereus</i> | <i>Pilosocereus aureispinus</i>   | JN035511 |
| Eudicotyledons | Cactaceae      | <i>Pilosocereus</i> | <i>Pilosocereus aureispinus</i>   | JN035512 |
| Eudicotyledons | Cactaceae      | <i>Pilosocereus</i> | <i>Pilosocereus aureispinus</i>   | JN035513 |
| Eudicotyledons | Cactaceae      | <i>Pilosocereus</i> | <i>Pilosocereus aurisetus</i>     | JN035481 |
| Eudicotyledons | Cactaceae      | <i>Pilosocereus</i> | <i>Pilosocereus aurisetus</i>     | JN035482 |
| Eudicotyledons | Cactaceae      | <i>Pilosocereus</i> | <i>Pilosocereus aurisetus</i>     | JN035483 |
| Eudicotyledons | Cactaceae      | <i>Pilosocereus</i> | <i>Pilosocereus aurisetus</i>     | JN035484 |
| Eudicotyledons | Cactaceae      | <i>Pilosocereus</i> | <i>Pilosocereus aurisetus</i>     | JN035485 |
| Eudicotyledons | Cactaceae      | <i>Pilosocereus</i> | <i>Pilosocereus aurisetus</i>     | JN035486 |
| Eudicotyledons | Cactaceae      | <i>Pilosocereus</i> | <i>Pilosocereus aurisetus</i>     | JN035487 |
| Eudicotyledons | Cactaceae      | <i>Pilosocereus</i> | <i>Pilosocereus aurisetus</i>     | JN035488 |
| Eudicotyledons | Cactaceae      | <i>Pilosocereus</i> | <i>Pilosocereus aurisetus</i>     | JN035489 |
| Eudicotyledons | Cactaceae      | <i>Pilosocereus</i> | <i>Pilosocereus aurisetus</i>     | JN035490 |
| Eudicotyledons | Cactaceae      | <i>Pilosocereus</i> | <i>Pilosocereus vilaboensis</i>   | JN035504 |

|                |                  |                     |                                 |          |
|----------------|------------------|---------------------|---------------------------------|----------|
| Eudicotyledons | Cactaceae        | <i>Pilosocereus</i> | <i>Pilosocereus vilaboensis</i> | JN035505 |
| Eudicotyledons | Cactaceae        | <i>Pilosocereus</i> | <i>Pilosocereus vilaboensis</i> | JN035506 |
| Eudicotyledons | Cactaceae        | <i>Pilosocereus</i> | <i>Pilosocereus vilaboensis</i> | JN035507 |
| Eudicotyledons | Cactaceae        | <i>Pilosocereus</i> | <i>Pilosocereus vilaboensis</i> | JN035508 |
| Ferns          | Pteridaceae      | <i>Pteris</i>       | <i>Pteris vittata</i>           | GU592490 |
| Ferns          | Pteridaceae      | <i>Pteris</i>       | <i>Pteris vittata</i>           | AB575497 |
| Ferns          | Pteridaceae      | <i>Pteris</i>       | <i>Pteris vittata</i>           | GU135302 |
| Ferns          | Lygodiaceae      | <i>Lygodium</i>     | <i>Lygodium japonicum</i>       | GU592479 |
| Ferns          | Lygodiaceae      | <i>Lygodium</i>     | <i>Lygodium japonicum</i>       | GU592480 |
| Ferns          | Lygodiaceae      | <i>Lygodium</i>     | <i>Lygodium japonicum</i>       | GU592481 |
| Ferns          | Lygodiaceae      | <i>Lygodium</i>     | <i>Lygodium japonicum</i>       | GU592482 |
| Ferns          | Lygodiaceae      | <i>Lygodium</i>     | <i>Lygodium japonicum</i>       | GQ435002 |
| Ferns          | Lygodiaceae      | <i>Lygodium</i>     | <i>Lygodium japonicum</i>       | GQ435003 |
| Ferns          | Lygodiaceae      | <i>Lygodium</i>     | <i>Lygodium japonicum</i>       | JN406994 |
| Ferns          | Lygodiaceae      | <i>Lygodium</i>     | <i>Lygodium japonicum</i>       | JN406995 |
| Ferns          | Lygodiaceae      | <i>Lygodium</i>     | <i>Lygodium japonicum</i>       | JN406996 |
| Ferns          | Lygodiaceae      | <i>Lygodium</i>     | <i>Lygodium japonicum</i>       | JN406997 |
| Ferns          | Lygodiaceae      | <i>Lygodium</i>     | <i>Lygodium japonicum</i>       | AB575389 |
| Ferns          | Lygodiaceae      | <i>Lygodium</i>     | <i>Lygodium japonicum</i>       | GU135305 |
| Ferns          | Pteridaceae      | <i>Adiantum</i>     | <i>Adiantum pedatum</i>         | HQ596582 |
| Ferns          | Pteridaceae      | <i>Adiantum</i>     | <i>Adiantum pedatum</i>         | AB575455 |
| Ferns          | Lygodiaceae      | <i>Lygodium</i>     | <i>Lygodium microphyllum</i>    | AB575390 |
| Ferns          | Lygodiaceae      | <i>Lygodium</i>     | <i>Lygodium microphyllum</i>    | GU135294 |
| Ferns          | Lygodiaceae      | <i>Lygodium</i>     | <i>Lygodium microphyllum</i>    | GU135402 |
| Ferns          | Pteridaceae      | <i>Pteris</i>       | <i>Pteris multifida</i>         | GU592489 |
| Ferns          | Pteridaceae      | <i>Pteris</i>       | <i>Pteris multifida</i>         | GQ434994 |
| Ferns          | Pteridaceae      | <i>Pteris</i>       | <i>Pteris multifida</i>         | AB575488 |
| Ferns          | Polypodiaceae    | <i>Pyrrosia</i>     | <i>Pyrrosia lingua</i>          | GU592455 |
| Ferns          | Polypodiaceae    | <i>Pyrrosia</i>     | <i>Pyrrosia lingua</i>          | GU592456 |
| Ferns          | Polypodiaceae    | <i>Pyrrosia</i>     | <i>Pyrrosia lingua</i>          | AB575909 |
| Ferns          | Pteridaceae      | <i>Pteris</i>       | <i>Pteris semipinnata</i>       | GU592488 |
| Ferns          | Pteridaceae      | <i>Pteris</i>       | <i>Pteris semipinnata</i>       | GQ435141 |
| Ferns          | Pteridaceae      | <i>Pteris</i>       | <i>Pteris semipinnata</i>       | AB575494 |
| Ferns          | Pteridaceae      | <i>Adiantum</i>     | <i>Adiantum hispidulum</i>      | GQ248237 |
| Ferns          | Pteridaceae      | <i>Adiantum</i>     | <i>Adiantum hispidulum</i>      | EF590667 |
| Ferns          | Pteridaceae      | <i>Adiantum</i>     | <i>Adiantum venustum</i>        | GQ248238 |
| Ferns          | Pteridaceae      | <i>Adiantum</i>     | <i>Adiantum venustum</i>        | EF590668 |
| Ferns          | Lygodiaceae      | <i>Lygodium</i>     | <i>Lygodium scandens</i>        | GU592477 |
| Ferns          | Lygodiaceae      | <i>Lygodium</i>     | <i>Lygodium scandens</i>        | GU592478 |
| Ferns          | Polypodiaceae    | <i>Pyrrosia</i>     | <i>Pyrrosia petiolosa</i>       | GU592452 |
| Ferns          | Polypodiaceae    | <i>Pyrrosia</i>     | <i>Pyrrosia petiolosa</i>       | GU592453 |
| Ferns          | Polypodiaceae    | <i>Pyrrosia</i>     | <i>Pyrrosia petiolosa</i>       | GU592454 |
| Ferns          | Polypodiaceae    | <i>Pyrrosia</i>     | <i>Pyrrosia sheareri</i>        | GU592458 |
| Ferns          | Polypodiaceae    | <i>Pyrrosia</i>     | <i>Pyrrosia sheareri</i>        | GU592459 |
| Ferns          | Polypodiaceae    | <i>Pyrrosia</i>     | <i>Pyrrosia sheareri</i>        | GU592460 |
| Ferns          | Dryopteridaceae  | <i>Dryopteris</i>   | <i>Dryopteris filix-mas</i>     | GQ428025 |
| Ferns          | Dryopteridaceae  | <i>Dryopteris</i>   | <i>Dryopteris filix-mas</i>     | JN189398 |
| Ferns          | Hymenophyllaceae | <i>Crepidomanes</i> | <i>Crepidomanes minutum</i>     | AB575367 |
| Ferns          | Hymenophyllaceae | <i>Crepidomanes</i> | <i>Crepidomanes minutum</i>     | EU338484 |
| Ferns          | Hymenophyllaceae | <i>Crepidomanes</i> | <i>Crepidomanes minutum</i>     | EU123004 |
| Ferns          | Hymenophyllaceae | <i>Crepidomanes</i> | <i>Crepidomanes minutum</i>     | EU123005 |
| Ferns          | Lindsaeaceae     | <i>Lindsaea</i>     | <i>Lindsaea ensifolia</i>       | GU478521 |
| Ferns          | Lindsaeaceae     | <i>Lindsaea</i>     | <i>Lindsaea ensifolia</i>       | GU478522 |

|       |                  |                     |                                 |          |
|-------|------------------|---------------------|---------------------------------|----------|
| Ferns | Lindsaeaceae     | <i>Lindsaea</i>     | <i>Lindsaea ensifolia</i>       | AB575416 |
| Ferns | Lindsaeaceae     | <i>Lindsaea</i>     | <i>Lindsaea odorata</i>         | GU478431 |
| Ferns | Lindsaeaceae     | <i>Lindsaea</i>     | <i>Lindsaea odorata</i>         | GU478432 |
| Ferns | Lindsaeaceae     | <i>Odontosoria</i>  | <i>Odontosoria chinensis</i>    | GU478452 |
| Ferns | Lindsaeaceae     | <i>Odontosoria</i>  | <i>Odontosoria chinensis</i>    | AB575428 |
| Ferns | Lomariopsidaceae | <i>Nephrolepis</i>  | <i>Nephrolepis cordifolia</i>   | AB575842 |
| Ferns | Lomariopsidaceae | <i>Nephrolepis</i>  | <i>Nephrolepis cordifolia</i>   | GU135431 |
| Ferns | Aspleniaceae     | <i>Asplenium</i>    | <i>Asplenium antiquum</i>       | AB575502 |
| Ferns | Aspleniaceae     | <i>Asplenium</i>    | <i>Asplenium antiquum</i>       | EU240017 |
| Ferns | Lindsaeaceae     | <i>Odontosoria</i>  | <i>Odontosoria biflora</i>      | GU478453 |
| Ferns | Lindsaeaceae     | <i>Odontosoria</i>  | <i>Odontosoria biflora</i>      | AB575427 |
| Ferns | Hymenophyllaceae | <i>Crepidomanes</i> | <i>Crepidomanes bipunctatum</i> | EU338483 |
| Ferns | Hymenophyllaceae | <i>Crepidomanes</i> | <i>Crepidomanes bipunctatum</i> | EU122997 |
| Ferns | Hymenophyllaceae | <i>Crepidomanes</i> | <i>Crepidomanes bipunctatum</i> | EU122998 |
| Ferns | Aspleniaceae     | <i>Asplenium</i>    | <i>Asplenium trichomanes</i>    | GQ428019 |
| Ferns | Aspleniaceae     | <i>Asplenium</i>    | <i>Asplenium trichomanes</i>    | AB575525 |
| Ferns | Aspleniaceae     | <i>Asplenium</i>    | <i>Asplenium trichomanes</i>    | EU125554 |
| Ferns | Dryopteridaceae  | <i>Dryopteris</i>   | <i>Dryopteris crassirhizoma</i> | GU592467 |
| Ferns | Dryopteridaceae  | <i>Dryopteris</i>   | <i>Dryopteris crassirhizoma</i> | GU592468 |
| Ferns | Dryopteridaceae  | <i>Dryopteris</i>   | <i>Dryopteris crassirhizoma</i> | GU592469 |
| Ferns | Dryopteridaceae  | <i>Dryopteris</i>   | <i>Dryopteris crassirhizoma</i> | JN189435 |
| Ferns | Dryopteridaceae  | <i>Dryopteris</i>   | <i>Dryopteris crassirhizoma</i> | AB575746 |
| Ferns | Aspleniaceae     | <i>Asplenium</i>    | <i>Asplenium dalhousiae</i>     | EU125563 |
| Ferns | Aspleniaceae     | <i>Asplenium</i>    | <i>Asplenium dalhousiae</i>     | EU125564 |
| Ferns | Aspleniaceae     | <i>Asplenium</i>    | <i>Asplenium ceterach</i>       | EU125557 |
| Ferns | Aspleniaceae     | <i>Asplenium</i>    | <i>Asplenium ceterach</i>       | EU125558 |
| Ferns | Aspleniaceae     | <i>Asplenium</i>    | <i>Asplenium ceterach</i>       | EU125559 |
| Ferns | Aspleniaceae     | <i>Asplenium</i>    | <i>Asplenium ceterach</i>       | EU125560 |
| Ferns | Aspleniaceae     | <i>Asplenium</i>    | <i>Asplenium ceterach</i>       | EU125561 |
| Ferns | Dryopteridaceae  | <i>Dryopteris</i>   | <i>Dryopteris goldieana</i>     | JN189396 |
| Ferns | Dryopteridaceae  | <i>Dryopteris</i>   | <i>Dryopteris goldieana</i>     | EF590693 |
| Ferns | Dryopteridaceae  | <i>Dryopteris</i>   | <i>Dryopteris intermedia</i>    | JN189394 |
| Ferns | Dryopteridaceae  | <i>Dryopteris</i>   | <i>Dryopteris intermedia</i>    | AB575765 |
| Ferns | Dryopteridaceae  | <i>Dryopteris</i>   | <i>Dryopteris intermedia</i>    | EU750638 |
| Ferns | Dryopteridaceae  | <i>Dryopteris</i>   | <i>Dryopteris intermedia</i>    | EU750639 |
| Ferns | Dryopteridaceae  | <i>Dryopteris</i>   | <i>Dryopteris intermedia</i>    | EU750640 |
| Ferns | Dryopteridaceae  | <i>Dryopteris</i>   | <i>Dryopteris bissetiana</i>    | JN189479 |
| Ferns | Dryopteridaceae  | <i>Dryopteris</i>   | <i>Dryopteris bissetiana</i>    | AB575740 |
| Ferns | Dryopteridaceae  | <i>Dryopteris</i>   | <i>Dryopteris carthusiana</i>   | JN189402 |
| Ferns | Dryopteridaceae  | <i>Dryopteris</i>   | <i>Dryopteris carthusiana</i>   | EU750635 |
| Ferns | Dryopteridaceae  | <i>Dryopteris</i>   | <i>Dryopteris carthusiana</i>   | EU750636 |
| Ferns | Dryopteridaceae  | <i>Dryopteris</i>   | <i>Dryopteris carthusiana</i>   | EU750637 |
| Ferns | Dryopteridaceae  | <i>Dryopteris</i>   | <i>Dryopteris championii</i>    | JN189480 |
| Ferns | Dryopteridaceae  | <i>Dryopteris</i>   | <i>Dryopteris championii</i>    | AB575742 |
| Ferns | Dryopteridaceae  | <i>Dryopteris</i>   | <i>Dryopteris erythrosora</i>   | JN189473 |
| Ferns | Dryopteridaceae  | <i>Dryopteris</i>   | <i>Dryopteris erythrosora</i>   | AB575749 |
| Ferns | Dryopteridaceae  | <i>Dryopteris</i>   | <i>Dryopteris erythrosora</i>   | EF590692 |
| Ferns | Dryopteridaceae  | <i>Dryopteris</i>   | <i>Dryopteris expansa</i>       | JN189397 |
| Ferns | Dryopteridaceae  | <i>Dryopteris</i>   | <i>Dryopteris expansa</i>       | AB575750 |
| Ferns | Dryopteridaceae  | <i>Dryopteris</i>   | <i>Dryopteris formosana</i>     | JN189437 |
| Ferns | Dryopteridaceae  | <i>Dryopteris</i>   | <i>Dryopteris formosana</i>     | AB575751 |
| Ferns | Dryopteridaceae  | <i>Dryopteris</i>   | <i>Dryopteris hondoensis</i>    | JN189475 |
| Ferns | Dryopteridaceae  | <i>Dryopteris</i>   | <i>Dryopteris hondoensis</i>    | AB575761 |

|       |                  |                     |                                    |          |
|-------|------------------|---------------------|------------------------------------|----------|
| Ferns | Dryopteridaceae  | <i>Dryopteris</i>   | <i>Dryopteris lacera</i>           | JN189477 |
| Ferns | Dryopteridaceae  | <i>Dryopteris</i>   | <i>Dryopteris lacera</i>           | AB575770 |
| Ferns | Dryopteridaceae  | <i>Dryopteris</i>   | <i>Dryopteris pacifica</i>         | JN189486 |
| Ferns | Dryopteridaceae  | <i>Dryopteris</i>   | <i>Dryopteris pacifica</i>         | AB575778 |
| Ferns | Dryopteridaceae  | <i>Dryopteris</i>   | <i>Dryopteris polylepis</i>        | JN189481 |
| Ferns | Dryopteridaceae  | <i>Dryopteris</i>   | <i>Dryopteris polylepis</i>        | AB575780 |
| Ferns | Dryopteridaceae  | <i>Dryopteris</i>   | <i>Dryopteris pycnopteroides</i>   | JN189476 |
| Ferns | Dryopteridaceae  | <i>Dryopteris</i>   | <i>Dryopteris pycnopteroides</i>   | AB575781 |
| Ferns | Dryopteridaceae  | <i>Dryopteris</i>   | <i>Dryopteris sacrosancta</i>      | JN189484 |
| Ferns | Dryopteridaceae  | <i>Dryopteris</i>   | <i>Dryopteris sacrosancta</i>      | AB575784 |
| Ferns | Dryopteridaceae  | <i>Dryopteris</i>   | <i>Dryopteris tokyoensis</i>       | JN189468 |
| Ferns | Dryopteridaceae  | <i>Dryopteris</i>   | <i>Dryopteris tokyoensis</i>       | AB575795 |
| Ferns | Dryopteridaceae  | <i>Dryopteris</i>   | <i>Dryopteris uniformis</i>        | JN189447 |
| Ferns | Dryopteridaceae  | <i>Dryopteris</i>   | <i>Dryopteris uniformis</i>        | AB575797 |
| Ferns | Aspleniaceae     | <i>Asplenium</i>    | <i>Asplenium hookerianum</i>       | EF418420 |
| Ferns | Aspleniaceae     | <i>Asplenium</i>    | <i>Asplenium hookerianum</i>       | EF418421 |
| Ferns | Aspleniaceae     | <i>Asplenium</i>    | <i>Asplenium hookerianum</i>       | EF418422 |
| Ferns | Aspleniaceae     | <i>Asplenium</i>    | <i>Asplenium shuttleworthianum</i> | EU240014 |
| Ferns | Aspleniaceae     | <i>Asplenium</i>    | <i>Asplenium shuttleworthianum</i> | EU240015 |
| Ferns | Aspleniaceae     | <i>Asplenium</i>    | <i>Asplenium shuttleworthianum</i> | EU240016 |
| Ferns | Dryopteridaceae  | <i>Dryopteris</i>   | <i>Dryopteris sparsa</i>           | JN189491 |
| Ferns | Dryopteridaceae  | <i>Dryopteris</i>   | <i>Dryopteris sparsa</i>           | AB575794 |
| Ferns | Lomariopsidaceae | <i>Nephrolepis</i>  | <i>Nephrolepis auriculata</i>      | GU592450 |
| Ferns | Lomariopsidaceae | <i>Nephrolepis</i>  | <i>Nephrolepis auriculata</i>      | GU592451 |
| Ferns | Dryopteridaceae  | <i>Dryopteris</i>   | <i>Dryopteris hendersonii</i>      | JN189439 |
| Ferns | Dryopteridaceae  | <i>Dryopteris</i>   | <i>Dryopteris hendersonii</i>      | AB575760 |
| Ferns | Dryopteridaceae  | <i>Dryopteris</i>   | <i>Dryopteris gymnosora</i>        | JN189438 |
| Ferns | Dryopteridaceae  | <i>Dryopteris</i>   | <i>Dryopteris gymnosora</i>        | AB575754 |
| Ferns | Dryopteridaceae  | <i>Dryopteris</i>   | <i>Dryopteris polita</i>           | JN189496 |
| Ferns | Dryopteridaceae  | <i>Dryopteris</i>   | <i>Dryopteris polita</i>           | AB575779 |
| Ferns | Hymenophyllaceae | <i>Crepidomanes</i> | <i>Crepidomanes humile</i>         | EU122999 |
| Ferns | Hymenophyllaceae | <i>Crepidomanes</i> | <i>Crepidomanes humile</i>         | EU123000 |
| Ferns | Hymenophyllaceae | <i>Crepidomanes</i> | <i>Crepidomanes humile</i>         | EU123001 |
| Ferns | Hymenophyllaceae | <i>Crepidomanes</i> | <i>Crepidomanes kurzii</i>         | EU123002 |
| Ferns | Hymenophyllaceae | <i>Crepidomanes</i> | <i>Crepidomanes kurzii</i>         | EU123003 |
| Ferns | Dryopteridaceae  | <i>Dryopteris</i>   | <i>Dryopteris marginalis</i>       | JN189393 |
| Ferns | Dryopteridaceae  | <i>Dryopteris</i>   | <i>Dryopteris marginalis</i>       | EU750641 |
| Ferns | Dryopteridaceae  | <i>Dryopteris</i>   | <i>Dryopteris marginalis</i>       | EU750642 |
| Ferns | Dryopteridaceae  | <i>Dryopteris</i>   | <i>Dryopteris marginalis</i>       | EU750643 |
| Ferns | Dryopteridaceae  | <i>Dryopteris</i>   | <i>Dryopteris marginalis</i>       | EU750644 |
| Ferns | Lindsaeaceae     | <i>Lindsaea</i>     | <i>Lindsaea blotiana</i>           | GU478510 |
| Ferns | Lindsaeaceae     | <i>Lindsaea</i>     | <i>Lindsaea blotiana</i>           | GU478511 |
| Ferns | Lindsaeaceae     | <i>Lindsaea</i>     | <i>Lindsaea divaricata</i>         | EU146032 |
| Ferns | Lindsaeaceae     | <i>Lindsaea</i>     | <i>Lindsaea divaricata</i>         | EU146033 |
| Ferns | Lindsaeaceae     | <i>Lindsaea</i>     | <i>Lindsaea divaricata</i>         | EU146034 |
| Ferns | Lindsaeaceae     | <i>Lindsaea</i>     | <i>Lindsaea divaricata</i>         | EU146036 |
| Ferns | Lindsaeaceae     | <i>Lindsaea</i>     | <i>Lindsaea divaricata</i>         | EU146037 |
| Ferns | Lindsaeaceae     | <i>Lindsaea</i>     | <i>Lindsaea divaricata</i>         | EU146040 |
| Ferns | Lindsaeaceae     | <i>Lindsaea</i>     | <i>Lindsaea digitata</i>           | EU146035 |
| Ferns | Lindsaeaceae     | <i>Lindsaea</i>     | <i>Lindsaea digitata</i>           | EU146038 |
| Ferns | Lindsaeaceae     | <i>Lindsaea</i>     | <i>Lindsaea digitata</i>           | EU146039 |
| Ferns | Lindsaeaceae     | <i>Lindsaea</i>     | <i>Lindsaea digitata</i>           | EU146041 |
| Ferns | Lindsaeaceae     | <i>Lindsaea</i>     | <i>Lindsaea bifida</i>             | GU478485 |

|       |                  |                      |                                 |          |
|-------|------------------|----------------------|---------------------------------|----------|
| Ferns | Lindsaeaceae     | <i>Lindsaea</i>      | <i>Lindsaea bifida</i>          | FJ360901 |
| Ferns | Lindsaeaceae     | <i>Lindsaea</i>      | <i>Lindsaea chienii</i>         | FJ360905 |
| Ferns | Lindsaeaceae     | <i>Lindsaea</i>      | <i>Lindsaea chienii</i>         | AB575415 |
| Ferns | Lindsaeaceae     | <i>Lindsaea</i>      | <i>Lindsaea coarctata</i>       | GU478507 |
| Ferns | Lindsaeaceae     | <i>Lindsaea</i>      | <i>Lindsaea coarctata</i>       | FJ360906 |
| Ferns | Lindsaeaceae     | <i>Lindsaea</i>      | <i>Lindsaea hemiglossa</i>      | GU478487 |
| Ferns | Lindsaeaceae     | <i>Lindsaea</i>      | <i>Lindsaea hemiglossa</i>      | FJ360910 |
| Ferns | Lindsaeaceae     | <i>Lindsaea</i>      | <i>Lindsaea javanensis</i>      | FJ360911 |
| Ferns | Lindsaeaceae     | <i>Lindsaea</i>      | <i>Lindsaea javanensis</i>      | FJ360912 |
| Ferns | Lindsaeaceae     | <i>Lindsaea</i>      | <i>Lindsaea javanensis</i>      | AB575418 |
| Ferns | Lindsaeaceae     | <i>Lindsaea</i>      | <i>Lindsaea lapeyrousei</i>     | GU478556 |
| Ferns | Lindsaeaceae     | <i>Lindsaea</i>      | <i>Lindsaea lapeyrousei</i>     | FJ360916 |
| Ferns | Lindsaeaceae     | <i>Lindsaea</i>      | <i>Lindsaea portoricensis</i>   | FJ360928 |
| Ferns | Lindsaeaceae     | <i>Lindsaea</i>      | <i>Lindsaea portoricensis</i>   | FJ360937 |
| Ferns | Lindsaeaceae     | <i>Lindsaea</i>      | <i>Lindsaea diplosora</i>       | GU478535 |
| Ferns | Lindsaeaceae     | <i>Lindsaea</i>      | <i>Lindsaea diplosora</i>       | GU478565 |
| Ferns | Lindsaeaceae     | <i>Lindsaea</i>      | <i>Lindsaea doryphora</i>       | GU478539 |
| Ferns | Lindsaeaceae     | <i>Lindsaea</i>      | <i>Lindsaea doryphora</i>       | GU478540 |
| Ferns | Lindsaeaceae     | <i>Lindsaea</i>      | <i>Lindsaea imrayana</i>        | GU478435 |
| Ferns | Lindsaeaceae     | <i>Lindsaea</i>      | <i>Lindsaea imrayana</i>        | GU478436 |
| Ferns | Lindsaeaceae     | <i>Lindsaea</i>      | <i>Lindsaea integra</i>         | GU478531 |
| Ferns | Lindsaeaceae     | <i>Lindsaea</i>      | <i>Lindsaea integra</i>         | GU478532 |
| Ferns | Lindsaeaceae     | <i>Lindsaea</i>      | <i>Lindsaea kawabatae</i>       | GU478499 |
| Ferns | Lindsaeaceae     | <i>Lindsaea</i>      | <i>Lindsaea kawabatae</i>       | AB575419 |
| Ferns | Lindsaeaceae     | <i>Lindsaea</i>      | <i>Lindsaea lucida</i>          | GU478542 |
| Ferns | Lindsaeaceae     | <i>Lindsaea</i>      | <i>Lindsaea lucida</i>          | AB575420 |
| Ferns | Lindsaeaceae     | <i>Lindsaea</i>      | <i>Lindsaea malayensis</i>      | GU478530 |
| Ferns | Lindsaeaceae     | <i>Lindsaea</i>      | <i>Lindsaea malayensis</i>      | GU478545 |
| Ferns | Lindsaeaceae     | <i>Lindsaea</i>      | <i>Lindsaea media</i>           | GU478515 |
| Ferns | Lindsaeaceae     | <i>Lindsaea</i>      | <i>Lindsaea media</i>           | GU478516 |
| Ferns | Lindsaeaceae     | <i>Lindsaea</i>      | <i>Lindsaea obtusa</i>          | GU478547 |
| Ferns | Lindsaeaceae     | <i>Lindsaea</i>      | <i>Lindsaea obtusa</i>          | GU478548 |
| Ferns | Lindsaeaceae     | <i>Lindsaea</i>      | <i>Lindsaea rigidiuscula</i>    | GU478475 |
| Ferns | Lindsaeaceae     | <i>Lindsaea</i>      | <i>Lindsaea rigidiuscula</i>    | GU478476 |
| Ferns | Dryopteridaceae  | <i>Dryopteris</i>    | <i>Dryopteris chinensis</i>     | JN189433 |
| Ferns | Dryopteridaceae  | <i>Dryopteris</i>    | <i>Dryopteris chinensis</i>     | AB575743 |
| Ferns | Dryopteridaceae  | <i>Dryopteris</i>    | <i>Dryopteris monticola</i>     | JN189482 |
| Ferns | Dryopteridaceae  | <i>Dryopteris</i>    | <i>Dryopteris monticola</i>     | AB575775 |
| Ferns | Dryopteridaceae  | <i>Dryopteris</i>    | <i>Dryopteris sordidipes</i>    | JN189495 |
| Ferns | Dryopteridaceae  | <i>Dryopteris</i>    | <i>Dryopteris sordidipes</i>    | AB575793 |
| Ferns | Hymenophyllaceae | <i>Hymenophyllum</i> | <i>Hymenophyllum polyanthos</i> | AB575375 |
| Ferns | Hymenophyllaceae | <i>Hymenophyllum</i> | <i>Hymenophyllum polyanthos</i> | EU338480 |
| Ferns | Hymenophyllaceae | <i>Hymenophyllum</i> | <i>Hymenophyllum polyanthos</i> | EU123016 |
| Ferns | Hymenophyllaceae | <i>Hymenophyllum</i> | <i>Hymenophyllum polyanthos</i> | EU123017 |
| Ferns | Hymenophyllaceae | <i>Hymenophyllum</i> | <i>Hymenophyllum polyanthos</i> | EU123018 |
| Ferns | Hymenophyllaceae | <i>Hymenophyllum</i> | <i>Hymenophyllum digitatum</i>  | EU338481 |
| Ferns | Hymenophyllaceae | <i>Hymenophyllum</i> | <i>Hymenophyllum digitatum</i>  | EU338482 |
| Ferns | Hymenophyllaceae | <i>Hymenophyllum</i> | <i>Hymenophyllum digitatum</i>  | EU123008 |
| Ferns | Hymenophyllaceae | <i>Hymenophyllum</i> | <i>Hymenophyllum digitatum</i>  | EU123009 |
| Ferns | Hymenophyllaceae | <i>Polyphlebium</i>  | <i>Polyphlebium borbonicum</i>  | EU338477 |
| Ferns | Hymenophyllaceae | <i>Polyphlebium</i>  | <i>Polyphlebium borbonicum</i>  | EU123019 |
| Ferns | Hymenophyllaceae | <i>Polyphlebium</i>  | <i>Polyphlebium borbonicum</i>  | EU123020 |
| Ferns | Hymenophyllaceae | <i>Polyphlebium</i>  | <i>Polyphlebium borbonicum</i>  | EU123021 |

|       |                  |                      |                                    |          |
|-------|------------------|----------------------|------------------------------------|----------|
| Ferns | Hymenophyllaceae | <i>Polyphlebium</i>  | <i>Polyphlebium endlicherianum</i> | EU338478 |
| Ferns | Hymenophyllaceae | <i>Polyphlebium</i>  | <i>Polyphlebium endlicherianum</i> | EU123022 |
| Ferns | Hymenophyllaceae | <i>Polyphlebium</i>  | <i>Polyphlebium endlicherianum</i> | EU123023 |
| Ferns | Hymenophyllaceae | <i>Hymenophyllum</i> | <i>Hymenophyllum pallidum</i>      | EU338479 |
| Ferns | Hymenophyllaceae | <i>Hymenophyllum</i> | <i>Hymenophyllum pallidum</i>      | EU123011 |
| Ferns | Hymenophyllaceae | <i>Hymenophyllum</i> | <i>Hymenophyllum pallidum</i>      | EU123012 |
| Ferns | Hymenophyllaceae | <i>Hymenophyllum</i> | <i>Hymenophyllum pallidum</i>      | EU123013 |
| Ferns | Hymenophyllaceae | <i>Hymenophyllum</i> | <i>Hymenophyllum pallidum</i>      | EU123014 |
| Ferns | Hymenophyllaceae | <i>Hymenophyllum</i> | <i>Hymenophyllum pallidum</i>      | EU123015 |
| Ferns | Pteridaceae      | <i>Cheilanthes</i>   | <i>Cheilanthes arizonica</i>       | JN647842 |
| Ferns | Pteridaceae      | <i>Cheilanthes</i>   | <i>Cheilanthes arizonica</i>       | JN647843 |
| Ferns | Pteridaceae      | <i>Cheilanthes</i>   | <i>Cheilanthes arizonica</i>       | JN647844 |
| Ferns | Pteridaceae      | <i>Cheilanthes</i>   | <i>Cheilanthes arizonica</i>       | JN647845 |
| Ferns | Pteridaceae      | <i>Cheilanthes</i>   | <i>Cheilanthes angustifolia</i>    | JN647835 |
| Ferns | Pteridaceae      | <i>Cheilanthes</i>   | <i>Cheilanthes angustifolia</i>    | JN647836 |
| Ferns | Pteridaceae      | <i>Cheilanthes</i>   | <i>Cheilanthes angustifolia</i>    | JN647837 |
| Ferns | Pteridaceae      | <i>Cheilanthes</i>   | <i>Cheilanthes angustifolia</i>    | JN647838 |
| Ferns | Pteridaceae      | <i>Cheilanthes</i>   | <i>Cheilanthes angustifolia</i>    | JN647839 |
| Ferns | Pteridaceae      | <i>Cheilanthes</i>   | <i>Cheilanthes angustifolia</i>    | JN647840 |
| Ferns | Pteridaceae      | <i>Cheilanthes</i>   | <i>Cheilanthes chaerophylla</i>    | JN647846 |
| Ferns | Pteridaceae      | <i>Cheilanthes</i>   | <i>Cheilanthes chaerophylla</i>    | JN647847 |
| Ferns | Pteridaceae      | <i>Cheilanthes</i>   | <i>Cheilanthes chaerophylla</i>    | JN647848 |
| Ferns | Pteridaceae      | <i>Cheilanthes</i>   | <i>Cheilanthes chaerophylla</i>    | JN647849 |
| Ferns | Pteridaceae      | <i>Cheilanthes</i>   | <i>Cheilanthes complanata</i>      | JN647850 |
| Ferns | Pteridaceae      | <i>Cheilanthes</i>   | <i>Cheilanthes complanata</i>      | JN647851 |
| Ferns | Pteridaceae      | <i>Cheilanthes</i>   | <i>Cheilanthes cuneata</i>         | JN647852 |
| Ferns | Pteridaceae      | <i>Cheilanthes</i>   | <i>Cheilanthes cuneata</i>         | JN647853 |
| Ferns | Pteridaceae      | <i>Cheilanthes</i>   | <i>Cheilanthes decomposita</i>     | JN647854 |
| Ferns | Pteridaceae      | <i>Cheilanthes</i>   | <i>Cheilanthes decomposita</i>     | JN647855 |
| Ferns | Pteridaceae      | <i>Cheilanthes</i>   | <i>Cheilanthes decomposita</i>     | JN647856 |
| Ferns | Pteridaceae      | <i>Cheilanthes</i>   | <i>Cheilanthes decomposita</i>     | JN647857 |
| Ferns | Pteridaceae      | <i>Cheilanthes</i>   | <i>Cheilanthes decurrens</i>       | JN647858 |
| Ferns | Pteridaceae      | <i>Cheilanthes</i>   | <i>Cheilanthes decurrens</i>       | JN647859 |
| Ferns | Pteridaceae      | <i>Cheilanthes</i>   | <i>Cheilanthes harrisii</i>        | JN647860 |
| Ferns | Pteridaceae      | <i>Cheilanthes</i>   | <i>Cheilanthes harrisii</i>        | JN647861 |
| Ferns | Pteridaceae      | <i>Cheilanthes</i>   | <i>Cheilanthes hintoniorum</i>     | JN647863 |
| Ferns | Pteridaceae      | <i>Cheilanthes</i>   | <i>Cheilanthes hintoniorum</i>     | JN647864 |
| Ferns | Pteridaceae      | <i>Cheilanthes</i>   | <i>Cheilanthes kaulfussii</i>      | JN647865 |
| Ferns | Pteridaceae      | <i>Cheilanthes</i>   | <i>Cheilanthes kaulfussii</i>      | JN647866 |
| Ferns | Pteridaceae      | <i>Cheilanthes</i>   | <i>Cheilanthes kaulfussii</i>      | JN647867 |
| Ferns | Pteridaceae      | <i>Cheilanthes</i>   | <i>Cheilanthes kaulfussii</i>      | JN647868 |
| Ferns | Pteridaceae      | <i>Cheilanthes</i>   | <i>Cheilanthes kaulfussii</i>      | JN647869 |
| Ferns | Pteridaceae      | <i>Cheilanthes</i>   | <i>Cheilanthes marginata</i>       | JN647870 |
| Ferns | Pteridaceae      | <i>Cheilanthes</i>   | <i>Cheilanthes marginata</i>       | JN647871 |
| Ferns | Pteridaceae      | <i>Cheilanthes</i>   | <i>Cheilanthes marginata</i>       | JN647872 |
| Ferns | Pteridaceae      | <i>Cheilanthes</i>   | <i>Cheilanthes marginata</i>       | JN647873 |
| Ferns | Pteridaceae      | <i>Cheilanthes</i>   | <i>Cheilanthes marginata</i>       | JN647874 |
| Ferns | Pteridaceae      | <i>Cheilanthes</i>   | <i>Cheilanthes marginata</i>       | JN647875 |
| Ferns | Pteridaceae      | <i>Cheilanthes</i>   | <i>Cheilanthes marginata</i>       | JN647876 |
| Ferns | Pteridaceae      | <i>Cheilanthes</i>   | <i>Cheilanthes marginata</i>       | JN647877 |
| Ferns | Pteridaceae      | <i>Cheilanthes</i>   | <i>Cheilanthes marginata</i>       | JN647878 |
| Ferns | Pteridaceae      | <i>Cheilanthes</i>   | <i>Cheilanthes membranacea</i>     | JN647879 |
| Ferns | Pteridaceae      | <i>Cheilanthes</i>   | <i>Cheilanthes membranacea</i>     | JN647880 |



|             |              |                    |                                |          |
|-------------|--------------|--------------------|--------------------------------|----------|
| Ferns       | Pteridaceae  | <i>Cheilanthes</i> | <i>Cheilanthes pellaepsis</i>  | JN647881 |
| Ferns       | Pteridaceae  | <i>Cheilanthes</i> | <i>Cheilanthes pellaepsis</i>  | JN647882 |
| Ferns       | Pteridaceae  | <i>Cheilanthes</i> | <i>Cheilanthes purpusii</i>    | JN647883 |
| Ferns       | Pteridaceae  | <i>Cheilanthes</i> | <i>Cheilanthes purpusii</i>    | JN647884 |
| Ferns       | Pteridaceae  | <i>Cheilanthes</i> | <i>Cheilanthes pyramidalis</i> | JN647885 |
| Ferns       | Pteridaceae  | <i>Cheilanthes</i> | <i>Cheilanthes pyramidalis</i> | JN647886 |
| Ferns       | Pteridaceae  | <i>Cheilanthes</i> | <i>Cheilanthes pyramidalis</i> | JN647887 |
| Ferns       | Pteridaceae  | <i>Cheilanthes</i> | <i>Cheilanthes pyramidalis</i> | JN647888 |
| Ferns       | Pteridaceae  | <i>Cheilanthes</i> | <i>Cheilanthes pyramidalis</i> | JN647889 |
| Ferns       | Pteridaceae  | <i>Cheilanthes</i> | <i>Cheilanthes pyramidalis</i> | JN647890 |
| Ferns       | Pteridaceae  | <i>Cheilanthes</i> | <i>Cheilanthes pyramidalis</i> | JN647891 |
| Ferns       | Woodsiaceae  | <i>Deparia</i>     | <i>Deparia petersenii</i>      | JN673925 |
| Ferns       | Woodsiaceae  | <i>Deparia</i>     | <i>Deparia petersenii</i>      | AB575589 |
| Ferns       | Woodsiaceae  | <i>Deparia</i>     | <i>Deparia lancea</i>          | JN673910 |
| Ferns       | Woodsiaceae  | <i>Deparia</i>     | <i>Deparia lancea</i>          | JN673911 |
| Ferns       | Woodsiaceae  | <i>Deparia</i>     | <i>Deparia lancea</i>          | JN673912 |
| Ferns       | Woodsiaceae  | <i>Deparia</i>     | <i>Deparia lancea</i>          | JN673913 |
| Ferns       | Woodsiaceae  | <i>Deparia</i>     | <i>Deparia lancea</i>          | JN673914 |
| Ferns       | Woodsiaceae  | <i>Deparia</i>     | <i>Deparia lancea</i>          | JN673915 |
| Ferns       | Woodsiaceae  | <i>Deparia</i>     | <i>Deparia lancea</i>          | JN673916 |
| Ferns       | Woodsiaceae  | <i>Deparia</i>     | <i>Deparia lancea</i>          | JN673917 |
| Ferns       | Woodsiaceae  | <i>Deparia</i>     | <i>Deparia lancea</i>          | JN673918 |
| Ferns       | Woodsiaceae  | <i>Deparia</i>     | <i>Deparia lancea</i>          | JN673919 |
| Ferns       | Woodsiaceae  | <i>Deparia</i>     | <i>Deparia lancea</i>          | AB575585 |
| Ferns       | Woodsiaceae  | <i>Deparia</i>     | <i>Deparia longipes</i>        | JN673920 |
| Ferns       | Woodsiaceae  | <i>Deparia</i>     | <i>Deparia longipes</i>        | JN673921 |
| Ferns       | Woodsiaceae  | <i>Deparia</i>     | <i>Deparia longipes</i>        | JN673922 |
| Ferns       | Woodsiaceae  | <i>Deparia</i>     | <i>Deparia longipes</i>        | JN673923 |
| Ferns       | Woodsiaceae  | <i>Deparia</i>     | <i>Deparia subfluvialis</i>    | JN673926 |
| Ferns       | Woodsiaceae  | <i>Deparia</i>     | <i>Deparia subfluvialis</i>    | JN673927 |
| Ferns       | Woodsiaceae  | <i>Deparia</i>     | <i>Deparia subfluvialis</i>    | JN673928 |
| Gymnosperms | Cupressaceae | <i>Cupressus</i>   | <i>Cupressus sempervirens</i>  | FR832556 |
| Gymnosperms | Cupressaceae | <i>Cupressus</i>   | <i>Cupressus sempervirens</i>  | FR832557 |
| Gymnosperms | Cupressaceae | <i>Cupressus</i>   | <i>Cupressus sempervirens</i>  | FR832558 |
| Gymnosperms | Cupressaceae | <i>Cupressus</i>   | <i>Cupressus sempervirens</i>  | FN689387 |
| Gymnosperms | Cupressaceae | <i>Juniperus</i>   | <i>Juniperus virginiana</i>    | EU750617 |
| Gymnosperms | Cupressaceae | <i>Juniperus</i>   | <i>Juniperus virginiana</i>    | EU750618 |
| Gymnosperms | Cupressaceae | <i>Juniperus</i>   | <i>Juniperus virginiana</i>    | EU750619 |
| Gymnosperms | Cupressaceae | <i>Juniperus</i>   | <i>Juniperus virginiana</i>    | EU750620 |
| Gymnosperms | Cupressaceae | <i>Juniperus</i>   | <i>Juniperus communis</i>      | FR832568 |
| Gymnosperms | Cupressaceae | <i>Juniperus</i>   | <i>Juniperus communis</i>      | FR865108 |
| Gymnosperms | Cupressaceae | <i>Juniperus</i>   | <i>Juniperus communis</i>      | EU750613 |
| Gymnosperms | Cupressaceae | <i>Juniperus</i>   | <i>Juniperus communis</i>      | EU750614 |
| Gymnosperms | Cupressaceae | <i>Juniperus</i>   | <i>Juniperus communis</i>      | EU750615 |
| Gymnosperms | Cupressaceae | <i>Juniperus</i>   | <i>Juniperus communis</i>      | EU750616 |
| Gymnosperms | Cupressaceae | <i>Juniperus</i>   | <i>Juniperus phoenicea</i>     | FR832560 |
| Gymnosperms | Cupressaceae | <i>Juniperus</i>   | <i>Juniperus phoenicea</i>     | FR832561 |
| Gymnosperms | Cupressaceae | <i>Juniperus</i>   | <i>Juniperus phoenicea</i>     | FR832562 |
| Gymnosperms | Cupressaceae | <i>Juniperus</i>   | <i>Juniperus phoenicea</i>     | FN689390 |
| Gymnosperms | Cupressaceae | <i>Cupressus</i>   | <i>Cupressus funebris</i>      | JN044326 |
| Gymnosperms | Cupressaceae | <i>Cupressus</i>   | <i>Cupressus funebris</i>      | JN044327 |
| Gymnosperms | Cupressaceae | <i>Cupressus</i>   | <i>Cupressus funebris</i>      | JN044328 |
| Gymnosperms | Cupressaceae | <i>Cupressus</i>   | <i>Cupressus funebris</i>      | JN044329 |

|             |              |                  |                                 |          |
|-------------|--------------|------------------|---------------------------------|----------|
| Gymnosperms | Cupressaceae | <i>Cupressus</i> | <i>Cupressus funebris</i>       | JN044330 |
| Gymnosperms | Cupressaceae | <i>Cupressus</i> | <i>Cupressus duclouxiana</i>    | JN044318 |
| Gymnosperms | Cupressaceae | <i>Cupressus</i> | <i>Cupressus duclouxiana</i>    | JN044319 |
| Gymnosperms | Cupressaceae | <i>Cupressus</i> | <i>Cupressus duclouxiana</i>    | JN044320 |
| Gymnosperms | Cupressaceae | <i>Cupressus</i> | <i>Cupressus duclouxiana</i>    | JN044321 |
| Gymnosperms | Cupressaceae | <i>Cupressus</i> | <i>Cupressus duclouxiana</i>    | JN044322 |
| Gymnosperms | Cupressaceae | <i>Cupressus</i> | <i>Cupressus duclouxiana</i>    | JN044323 |
| Gymnosperms | Cupressaceae | <i>Juniperus</i> | <i>Juniperus przewalskii</i>    | JN045060 |
| Gymnosperms | Cupressaceae | <i>Juniperus</i> | <i>Juniperus przewalskii</i>    | JN045061 |
| Gymnosperms | Cupressaceae | <i>Juniperus</i> | <i>Juniperus przewalskii</i>    | JN045062 |
| Gymnosperms | Cupressaceae | <i>Juniperus</i> | <i>Juniperus przewalskii</i>    | JN045063 |
| Gymnosperms | Cupressaceae | <i>Juniperus</i> | <i>Juniperus przewalskii</i>    | JN045064 |
| Gymnosperms | Cupressaceae | <i>Juniperus</i> | <i>Juniperus przewalskii</i>    | HQ832759 |
| Gymnosperms | Cupressaceae | <i>Juniperus</i> | <i>Juniperus tibetica</i>       | JN045072 |
| Gymnosperms | Cupressaceae | <i>Juniperus</i> | <i>Juniperus tibetica</i>       | JN045073 |
| Gymnosperms | Cupressaceae | <i>Juniperus</i> | <i>Juniperus tibetica</i>       | JN045074 |
| Gymnosperms | Cupressaceae | <i>Juniperus</i> | <i>Juniperus tibetica</i>       | JN045075 |
| Gymnosperms | Cupressaceae | <i>Juniperus</i> | <i>Juniperus tibetica</i>       | JN045076 |
| Gymnosperms | Cupressaceae | <i>Juniperus</i> | <i>Juniperus tibetica</i>       | JN045077 |
| Gymnosperms | Cupressaceae | <i>Juniperus</i> | <i>Juniperus tibetica</i>       | HQ832751 |
| Gymnosperms | Cupressaceae | <i>Juniperus</i> | <i>Juniperus tibetica</i>       | HQ832752 |
| Gymnosperms | Cupressaceae | <i>Juniperus</i> | <i>Juniperus tibetica</i>       | HQ832753 |
| Gymnosperms | Cupressaceae | <i>Juniperus</i> | <i>Juniperus tibetica</i>       | HQ832754 |
| Gymnosperms | Cupressaceae | <i>Cupressus</i> | <i>Cupressus austrotibetica</i> | JN044324 |
| Gymnosperms | Cupressaceae | <i>Cupressus</i> | <i>Cupressus austrotibetica</i> | JN044325 |
| Gymnosperms | Cupressaceae | <i>Cupressus</i> | <i>Cupressus gigantea</i>       | JN044316 |
| Gymnosperms | Cupressaceae | <i>Cupressus</i> | <i>Cupressus gigantea</i>       | JN044317 |
| Gymnosperms | Cupressaceae | <i>Juniperus</i> | <i>Juniperus squamata</i>       | JN045069 |
| Gymnosperms | Cupressaceae | <i>Juniperus</i> | <i>Juniperus squamata</i>       | JN045070 |
| Gymnosperms | Cupressaceae | <i>Juniperus</i> | <i>Juniperus squamata</i>       | JN045071 |
| Gymnosperms | Cupressaceae | <i>Juniperus</i> | <i>Juniperus squamata</i>       | HQ832760 |
| Gymnosperms | Cupressaceae | <i>Juniperus</i> | <i>Juniperus pingii</i>         | JN045055 |
| Gymnosperms | Cupressaceae | <i>Juniperus</i> | <i>Juniperus pingii</i>         | JN045056 |
| Gymnosperms | Cupressaceae | <i>Juniperus</i> | <i>Juniperus pingii</i>         | JN045057 |
| Gymnosperms | Cupressaceae | <i>Juniperus</i> | <i>Juniperus pingii</i>         | JN045058 |
| Gymnosperms | Cupressaceae | <i>Juniperus</i> | <i>Juniperus pingii</i>         | JN045059 |
| Gymnosperms | Cupressaceae | <i>Juniperus</i> | <i>Juniperus saltuaria</i>      | JN045065 |
| Gymnosperms | Cupressaceae | <i>Juniperus</i> | <i>Juniperus saltuaria</i>      | JN045066 |
| Gymnosperms | Cupressaceae | <i>Juniperus</i> | <i>Juniperus saltuaria</i>      | HQ832755 |
| Gymnosperms | Cupressaceae | <i>Juniperus</i> | <i>Juniperus saltuaria</i>      | HQ832756 |
| Gymnosperms | Cupressaceae | <i>Juniperus</i> | <i>Juniperus microsperma</i>    | JN045052 |
| Gymnosperms | Cupressaceae | <i>Juniperus</i> | <i>Juniperus microsperma</i>    | JN045053 |
| Gymnosperms | Cupressaceae | <i>Juniperus</i> | <i>Juniperus microsperma</i>    | JN045054 |
| Gymnosperms | Cupressaceae | <i>Juniperus</i> | <i>Juniperus microsperma</i>    | HQ832761 |
| Gymnosperms | Cupressaceae | <i>Juniperus</i> | <i>Juniperus convallium</i>     | JN045047 |
| Gymnosperms | Cupressaceae | <i>Juniperus</i> | <i>Juniperus convallium</i>     | JN045048 |
| Gymnosperms | Cupressaceae | <i>Juniperus</i> | <i>Juniperus convallium</i>     | JN045049 |
| Gymnosperms | Cupressaceae | <i>Juniperus</i> | <i>Juniperus convallium</i>     | JN045050 |
| Gymnosperms | Cupressaceae | <i>Juniperus</i> | <i>Juniperus convallium</i>     | JN045051 |
| Gymnosperms | Cupressaceae | <i>Juniperus</i> | <i>Juniperus convallium</i>     | HQ832757 |
| Gymnosperms | Cupressaceae | <i>Juniperus</i> | <i>Juniperus convallium</i>     | HQ832758 |
| Gymnosperms | Pinaceae     | <i>Picea</i>     | <i>Picea abies</i>              | FR832550 |
| Gymnosperms | Pinaceae     | <i>Picea</i>     | <i>Picea abies</i>              | FR832551 |

|             |          |                    |                               |          |
|-------------|----------|--------------------|-------------------------------|----------|
| Gymnosperms | Pinaceae | <i>Picea</i>       | <i>Picea abies</i>            | FR832552 |
| Gymnosperms | Pinaceae | <i>Picea</i>       | <i>Picea abies</i>            | FJ493294 |
| Gymnosperms | Pinaceae | <i>Picea</i>       | <i>Picea abies</i>            | HQ114857 |
| Gymnosperms | Pinaceae | <i>Picea</i>       | <i>Picea abies</i>            | HQ114858 |
| Gymnosperms | Pinaceae | <i>Picea</i>       | <i>Picea glauca</i>           | EU750621 |
| Gymnosperms | Pinaceae | <i>Picea</i>       | <i>Picea glauca</i>           | EU750622 |
| Gymnosperms | Pinaceae | <i>Picea</i>       | <i>Picea glauca</i>           | EU750623 |
| Gymnosperms | Pinaceae | <i>Picea</i>       | <i>Picea glauca</i>           | EU750624 |
| Gymnosperms | Pinaceae | <i>Picea</i>       | <i>Picea glauca</i>           | HQ114832 |
| Gymnosperms | Pinaceae | <i>Picea</i>       | <i>Picea pungens</i>          | HQ114866 |
| Gymnosperms | Pinaceae | <i>Picea</i>       | <i>Picea pungens</i>          | HQ114867 |
| Gymnosperms | Pinaceae | <i>Picea</i>       | <i>Picea mariana</i>          | EU750625 |
| Gymnosperms | Pinaceae | <i>Picea</i>       | <i>Picea mariana</i>          | EU750626 |
| Gymnosperms | Pinaceae | <i>Picea</i>       | <i>Picea mariana</i>          | HQ114835 |
| Gymnosperms | Pinaceae | <i>Pinus</i>       | <i>Pinus pinea</i>            | FR832538 |
| Gymnosperms | Pinaceae | <i>Pinus</i>       | <i>Pinus pinea</i>            | FR832539 |
| Gymnosperms | Pinaceae | <i>Pinus</i>       | <i>Pinus pinea</i>            | FR832540 |
| Gymnosperms | Pinaceae | <i>Pinus</i>       | <i>Pinus pinea</i>            | FN689389 |
| Gymnosperms | Pinaceae | <i>Pinus</i>       | <i>Pinus strobus</i>          | GQ248367 |
| Gymnosperms | Pinaceae | <i>Pinus</i>       | <i>Pinus strobus</i>          | GQ435358 |
| Gymnosperms | Pinaceae | <i>Pinus</i>       | <i>Pinus strobus</i>          | EF590725 |
| Gymnosperms | Pinaceae | <i>Pinus</i>       | <i>Pinus strobus</i>          | EU750629 |
| Gymnosperms | Pinaceae | <i>Pinus</i>       | <i>Pinus strobus</i>          | EU750630 |
| Gymnosperms | Pinaceae | <i>Pinus</i>       | <i>Pinus strobus</i>          | EU750631 |
| Gymnosperms | Pinaceae | <i>Pinus</i>       | <i>Pinus sylvestris</i>       | FR832541 |
| Gymnosperms | Pinaceae | <i>Pinus</i>       | <i>Pinus sylvestris</i>       | FR832542 |
| Gymnosperms | Pinaceae | <i>Pinus</i>       | <i>Pinus sylvestris</i>       | FR832543 |
| Gymnosperms | Pinaceae | <i>Pinus</i>       | <i>Pinus sylvestris</i>       | FJ493296 |
| Gymnosperms | Pinaceae | <i>Pinus</i>       | <i>Pinus sylvestris</i>       | EU750632 |
| Gymnosperms | Pinaceae | <i>Pinus</i>       | <i>Pinus sylvestris</i>       | EU750633 |
| Gymnosperms | Pinaceae | <i>Pinus</i>       | <i>Pinus sylvestris</i>       | EU750634 |
| Gymnosperms | Pinaceae | <i>Pinus</i>       | <i>Pinus thunbergii</i>       | GQ463529 |
| Gymnosperms | Pinaceae | <i>Pinus</i>       | <i>Pinus thunbergii</i>       | GQ463530 |
| Gymnosperms | Pinaceae | <i>Pinus</i>       | <i>Pinus thunbergii</i>       | JN046375 |
| Gymnosperms | Pinaceae | <i>Pinus</i>       | <i>Pinus thunbergii</i>       | JN046376 |
| Gymnosperms | Pinaceae | <i>Pinus</i>       | <i>Pinus thunbergii</i>       | JN046377 |
| Gymnosperms | Pinaceae | <i>Pinus</i>       | <i>Pinus thunbergii</i>       | JN046378 |
| Gymnosperms | Pinaceae | <i>Pinus</i>       | <i>Pinus thunbergii</i>       | JN046379 |
| Gymnosperms | Pinaceae | <i>Pinus</i>       | <i>Pinus thunbergii</i>       | HQ114893 |
| Gymnosperms | Pinaceae | <i>Pinus</i>       | <i>Pinus thunbergii</i>       | HQ849863 |
| Gymnosperms | Pinaceae | <i>Pinus</i>       | <i>Pinus banksiana</i>        | EU750627 |
| Gymnosperms | Pinaceae | <i>Pinus</i>       | <i>Pinus banksiana</i>        | EU750628 |
| Gymnosperms | Taxaceae | <i>Amentotaxus</i> | <i>Amentotaxus argotaenia</i> | EF660691 |
| Gymnosperms | Taxaceae | <i>Amentotaxus</i> | <i>Amentotaxus argotaenia</i> | JN043910 |
| Gymnosperms | Taxaceae | <i>Amentotaxus</i> | <i>Amentotaxus argotaenia</i> | JN043911 |
| Gymnosperms | Taxaceae | <i>Amentotaxus</i> | <i>Amentotaxus argotaenia</i> | JN043912 |
| Gymnosperms | Taxaceae | <i>Amentotaxus</i> | <i>Amentotaxus argotaenia</i> | JN043913 |
| Gymnosperms | Taxaceae | <i>Amentotaxus</i> | <i>Amentotaxus argotaenia</i> | JN043914 |
| Gymnosperms | Taxaceae | <i>Taxus</i>       | <i>Taxus baccata</i>          | EF017303 |
| Gymnosperms | Taxaceae | <i>Taxus</i>       | <i>Taxus baccata</i>          | GQ248397 |
| Gymnosperms | Taxaceae | <i>Taxus</i>       | <i>Taxus baccata</i>          | FR832569 |
| Gymnosperms | Taxaceae | <i>Taxus</i>       | <i>Taxus baccata</i>          | FR832570 |
| Gymnosperms | Taxaceae | <i>Taxus</i>       | <i>Taxus baccata</i>          | FR832571 |

|             |               |                    |                                |          |
|-------------|---------------|--------------------|--------------------------------|----------|
| Gymnosperms | Taxaceae      | <i>Taxus</i>       | <i>Taxus baccata</i>           | FJ493316 |
| Gymnosperms | Taxaceae      | <i>Taxus</i>       | <i>Taxus baccata</i>           | EF590746 |
| Gymnosperms | Taxaceae      | <i>Taxus</i>       | <i>Taxus baccata</i>           | HM591111 |
| Gymnosperms | Taxaceae      | <i>Taxus</i>       | <i>Taxus baccata</i>           | HM591112 |
| Gymnosperms | Taxaceae      | <i>Taxus</i>       | <i>Taxus baccata</i>           | HM591113 |
| Gymnosperms | Taxaceae      | <i>Taxus</i>       | <i>Taxus baccata</i>           | HM591114 |
| Gymnosperms | Taxaceae      | <i>Taxus</i>       | <i>Taxus baccata</i>           | HM591115 |
| Gymnosperms | Pinaceae      | <i>Pinus</i>       | <i>Pinus mugo</i>              | FR832533 |
| Gymnosperms | Pinaceae      | <i>Pinus</i>       | <i>Pinus mugo</i>              | FR832534 |
| Gymnosperms | Pinaceae      | <i>Pinus</i>       | <i>Pinus mugo</i>              | FR832535 |
| Gymnosperms | Ephedraceae   | <i>Ephedra</i>     | <i>Ephedra sinica</i>          | GQ435178 |
| Gymnosperms | Ephedraceae   | <i>Ephedra</i>     | <i>Ephedra sinica</i>          | GQ463516 |
| Gymnosperms | Ephedraceae   | <i>Ephedra</i>     | <i>Ephedra sinica</i>          | AY849347 |
| Gymnosperms | Ephedraceae   | <i>Ephedra</i>     | <i>Ephedra sinica</i>          | AY849349 |
| Gymnosperms | Araucariaceae | <i>Araucaria</i>   | <i>Araucaria araucana</i>      | AM922000 |
| Gymnosperms | Araucariaceae | <i>Araucaria</i>   | <i>Araucaria araucana</i>      | AM922001 |
| Gymnosperms | Pinaceae      | <i>Abies</i>       | <i>Abies alba</i>              | FR832520 |
| Gymnosperms | Pinaceae      | <i>Abies</i>       | <i>Abies alba</i>              | FR832521 |
| Gymnosperms | Pinaceae      | <i>Abies</i>       | <i>Abies alba</i>              | FR832522 |
| Gymnosperms | Pinaceae      | <i>Abies</i>       | <i>Abies alba</i>              | FJ493291 |
| Gymnosperms | Taxaceae      | <i>Amentotaxus</i> | <i>Amentotaxus formosana</i>   | GQ463512 |
| Gymnosperms | Taxaceae      | <i>Amentotaxus</i> | <i>Amentotaxus formosana</i>   | EF660670 |
| Gymnosperms | Taxaceae      | <i>Amentotaxus</i> | <i>Amentotaxus formosana</i>   | JN043915 |
| Gymnosperms | Taxaceae      | <i>Amentotaxus</i> | <i>Amentotaxus formosana</i>   | JN043916 |
| Gymnosperms | Taxaceae      | <i>Amentotaxus</i> | <i>Amentotaxus formosana</i>   | JN043917 |
| Gymnosperms | Araucariaceae | <i>Araucaria</i>   | <i>Araucaria cunninghamii</i>  | GQ463518 |
| Gymnosperms | Araucariaceae | <i>Araucaria</i>   | <i>Araucaria cunninghamii</i>  | AM922006 |
| Gymnosperms | Araucariaceae | <i>Araucaria</i>   | <i>Araucaria hunsteinii</i>    | FJ173528 |
| Gymnosperms | Araucariaceae | <i>Araucaria</i>   | <i>Araucaria hunsteinii</i>    | AM922007 |
| Gymnosperms | Pinaceae      | <i>Pinus</i>       | <i>Pinus cembra</i>            | FR832523 |
| Gymnosperms | Pinaceae      | <i>Pinus</i>       | <i>Pinus cembra</i>            | FR832524 |
| Gymnosperms | Pinaceae      | <i>Pinus</i>       | <i>Pinus nigra</i>             | EU531715 |
| Gymnosperms | Pinaceae      | <i>Pinus</i>       | <i>Pinus nigra</i>             | FJ493295 |
| Gymnosperms | Pinaceae      | <i>Pinus</i>       | <i>Pinus nigra</i>             | FN689385 |
| Gymnosperms | Podocarpaceae | <i>Podocarpus</i>  | <i>Podocarpus macrophyllus</i> | GQ463514 |
| Gymnosperms | Podocarpaceae | <i>Podocarpus</i>  | <i>Podocarpus macrophyllus</i> | EF660690 |
| Gymnosperms | Araucariaceae | <i>Araucaria</i>   | <i>Araucaria bernieri</i>      | FJ173518 |
| Gymnosperms | Araucariaceae | <i>Araucaria</i>   | <i>Araucaria bernieri</i>      | FJ173519 |
| Gymnosperms | Araucariaceae | <i>Araucaria</i>   | <i>Araucaria bernieri</i>      | AM922002 |
| Gymnosperms | Araucariaceae | <i>Araucaria</i>   | <i>Araucaria biramulata</i>    | FJ173520 |
| Gymnosperms | Araucariaceae | <i>Araucaria</i>   | <i>Araucaria biramulata</i>    | FJ173521 |
| Gymnosperms | Araucariaceae | <i>Araucaria</i>   | <i>Araucaria biramulata</i>    | FJ173522 |
| Gymnosperms | Araucariaceae | <i>Araucaria</i>   | <i>Araucaria biramulata</i>    | AM922004 |
| Gymnosperms | Araucariaceae | <i>Araucaria</i>   | <i>Araucaria columnaris</i>    | FJ173523 |
| Gymnosperms | Araucariaceae | <i>Araucaria</i>   | <i>Araucaria columnaris</i>    | FJ173524 |
| Gymnosperms | Araucariaceae | <i>Araucaria</i>   | <i>Araucaria columnaris</i>    | AM922005 |
| Gymnosperms | Araucariaceae | <i>Araucaria</i>   | <i>Araucaria humboldtensis</i> | FJ173526 |
| Gymnosperms | Araucariaceae | <i>Araucaria</i>   | <i>Araucaria humboldtensis</i> | FJ173527 |
| Gymnosperms | Araucariaceae | <i>Araucaria</i>   | <i>Araucaria laubenfelsii</i>  | FJ173529 |
| Gymnosperms | Araucariaceae | <i>Araucaria</i>   | <i>Araucaria laubenfelsii</i>  | FJ173530 |
| Gymnosperms | Araucariaceae | <i>Araucaria</i>   | <i>Araucaria luxurians</i>     | FJ173531 |
| Gymnosperms | Araucariaceae | <i>Araucaria</i>   | <i>Araucaria luxurians</i>     | FJ173532 |
| Gymnosperms | Araucariaceae | <i>Araucaria</i>   | <i>Araucaria luxurians</i>     | FJ173533 |

|             |               |                  |                             |          |
|-------------|---------------|------------------|-----------------------------|----------|
| Gymnosperms | Araucariaceae | <i>Araucaria</i> | <i>Araucaria montana</i>    | FJ173534 |
| Gymnosperms | Araucariaceae | <i>Araucaria</i> | <i>Araucaria montana</i>    | FJ173535 |
| Gymnosperms | Araucariaceae | <i>Araucaria</i> | <i>Araucaria montana</i>    | FJ173536 |
| Gymnosperms | Araucariaceae | <i>Araucaria</i> | <i>Araucaria montana</i>    | FJ173537 |
| Gymnosperms | Araucariaceae | <i>Araucaria</i> | <i>Araucaria montana</i>    | AM922008 |
| Gymnosperms | Araucariaceae | <i>Araucaria</i> | <i>Araucaria muelleri</i>   | FJ173538 |
| Gymnosperms | Araucariaceae | <i>Araucaria</i> | <i>Araucaria muelleri</i>   | AM922009 |
| Gymnosperms | Araucariaceae | <i>Araucaria</i> | <i>Araucaria muelleri</i>   | AM922010 |
| Gymnosperms | Araucariaceae | <i>Araucaria</i> | <i>Araucaria nemorosa</i>   | FJ173539 |
| Gymnosperms | Araucariaceae | <i>Araucaria</i> | <i>Araucaria nemorosa</i>   | FJ173540 |
| Gymnosperms | Araucariaceae | <i>Araucaria</i> | <i>Araucaria nemorosa</i>   | AM922011 |
| Gymnosperms | Araucariaceae | <i>Araucaria</i> | <i>Araucaria rulei</i>      | FJ173541 |
| Gymnosperms | Araucariaceae | <i>Araucaria</i> | <i>Araucaria rulei</i>      | FJ173542 |
| Gymnosperms | Araucariaceae | <i>Araucaria</i> | <i>Araucaria rulei</i>      | AM922012 |
| Gymnosperms | Araucariaceae | <i>Araucaria</i> | <i>Araucaria rulei</i>      | AM922013 |
| Gymnosperms | Araucariaceae | <i>Araucaria</i> | <i>Araucaria schmidii</i>   | FJ173543 |
| Gymnosperms | Araucariaceae | <i>Araucaria</i> | <i>Araucaria schmidii</i>   | FJ173544 |
| Gymnosperms | Araucariaceae | <i>Araucaria</i> | <i>Araucaria schmidii</i>   | FJ173545 |
| Gymnosperms | Araucariaceae | <i>Araucaria</i> | <i>Araucaria scopulorum</i> | FJ173546 |
| Gymnosperms | Araucariaceae | <i>Araucaria</i> | <i>Araucaria scopulorum</i> | FJ173547 |
| Gymnosperms | Araucariaceae | <i>Araucaria</i> | <i>Araucaria scopulorum</i> | FJ173548 |
| Gymnosperms | Araucariaceae | <i>Araucaria</i> | <i>Araucaria subulata</i>   | FJ173549 |
| Gymnosperms | Araucariaceae | <i>Araucaria</i> | <i>Araucaria subulata</i>   | AM922014 |
| Gymnosperms | Pinaceae      | <i>Picea</i>     | <i>Picea jezoensis</i>      | JN046260 |
| Gymnosperms | Pinaceae      | <i>Picea</i>     | <i>Picea jezoensis</i>      | JN046261 |
| Gymnosperms | Pinaceae      | <i>Picea</i>     | <i>Picea jezoensis</i>      | JN046262 |
| Gymnosperms | Pinaceae      | <i>Picea</i>     | <i>Picea jezoensis</i>      | HQ114854 |
| Gymnosperms | Pinaceae      | <i>Picea</i>     | <i>Picea jezoensis</i>      | HQ114855 |
| Gymnosperms | Pinaceae      | <i>Picea</i>     | <i>Picea jezoensis</i>      | HQ114868 |
| Gymnosperms | Pinaceae      | <i>Pinus</i>     | <i>Pinus bungeana</i>       | GQ435356 |
| Gymnosperms | Pinaceae      | <i>Pinus</i>     | <i>Pinus bungeana</i>       | GQ435357 |
| Gymnosperms | Pinaceae      | <i>Pinus</i>     | <i>Pinus halepensis</i>     | EU531714 |
| Gymnosperms | Pinaceae      | <i>Pinus</i>     | <i>Pinus halepensis</i>     | FR832528 |
| Gymnosperms | Pinaceae      | <i>Pinus</i>     | <i>Pinus halepensis</i>     | FR832529 |
| Gymnosperms | Pinaceae      | <i>Pinus</i>     | <i>Pinus halepensis</i>     | FR832530 |
| Gymnosperms | Pinaceae      | <i>Pinus</i>     | <i>Pinus halepensis</i>     | FR832531 |
| Gymnosperms | Pinaceae      | <i>Pinus</i>     | <i>Pinus halepensis</i>     | FN689388 |
| Gymnosperms | Pinaceae      | <i>Pinus</i>     | <i>Pinus parviflora</i>     | GQ248366 |
| Gymnosperms | Pinaceae      | <i>Pinus</i>     | <i>Pinus parviflora</i>     | EF590724 |
| Gymnosperms | Pinaceae      | <i>Pinus</i>     | <i>Pinus pinaster</i>       | FR832525 |
| Gymnosperms | Pinaceae      | <i>Pinus</i>     | <i>Pinus pinaster</i>       | FR832526 |
| Gymnosperms | Pinaceae      | <i>Pinus</i>     | <i>Pinus pinaster</i>       | FR832527 |
| Gymnosperms | Pinaceae      | <i>Pinus</i>     | <i>Pinus densiflora</i>     | JN046325 |
| Gymnosperms | Pinaceae      | <i>Pinus</i>     | <i>Pinus densiflora</i>     | JN046326 |
| Gymnosperms | Pinaceae      | <i>Pinus</i>     | <i>Pinus densiflora</i>     | JN046327 |
| Gymnosperms | Pinaceae      | <i>Pinus</i>     | <i>Pinus densiflora</i>     | JN046328 |
| Gymnosperms | Pinaceae      | <i>Pinus</i>     | <i>Pinus densiflora</i>     | JN046329 |
| Gymnosperms | Pinaceae      | <i>Pinus</i>     | <i>Pinus densiflora</i>     | HQ849861 |
| Gymnosperms | Taxaceae      | <i>Taxus</i>     | <i>Taxus x media</i>        | DQ888580 |
| Gymnosperms | Taxaceae      | <i>Taxus</i>     | <i>Taxus x media</i>        | EF660698 |
| Gymnosperms | Taxaceae      | <i>Taxus</i>     | <i>Taxus canadensis</i>     | EF017304 |
| Gymnosperms | Taxaceae      | <i>Taxus</i>     | <i>Taxus canadensis</i>     | GQ274315 |
| Gymnosperms | Taxaceae      | <i>Taxus</i>     | <i>Taxus canadensis</i>     | GQ435017 |

|             |          |                    |                                |          |
|-------------|----------|--------------------|--------------------------------|----------|
| Gymnosperms | Pinaceae | <i>Pinus</i>       | <i>Pinus massoniana</i>        | HQ427086 |
| Gymnosperms | Pinaceae | <i>Pinus</i>       | <i>Pinus massoniana</i>        | JN046355 |
| Gymnosperms | Pinaceae | <i>Pinus</i>       | <i>Pinus massoniana</i>        | JN046356 |
| Gymnosperms | Pinaceae | <i>Pinus</i>       | <i>Pinus massoniana</i>        | JN046357 |
| Gymnosperms | Pinaceae | <i>Pinus</i>       | <i>Pinus massoniana</i>        | JN046358 |
| Gymnosperms | Pinaceae | <i>Pinus</i>       | <i>Pinus massoniana</i>        | JN046359 |
| Gymnosperms | Pinaceae | <i>Pinus</i>       | <i>Pinus massoniana</i>        | HQ849864 |
| Gymnosperms | Pinaceae | <i>Pinus</i>       | <i>Pinus tabuliformis</i>      | JN046360 |
| Gymnosperms | Pinaceae | <i>Pinus</i>       | <i>Pinus tabuliformis</i>      | JN046361 |
| Gymnosperms | Pinaceae | <i>Pinus</i>       | <i>Pinus tabuliformis</i>      | JN046362 |
| Gymnosperms | Pinaceae | <i>Pinus</i>       | <i>Pinus tabuliformis</i>      | JN046363 |
| Gymnosperms | Pinaceae | <i>Pinus</i>       | <i>Pinus tabuliformis</i>      | JN046364 |
| Gymnosperms | Pinaceae | <i>Pinus</i>       | <i>Pinus yunnanensis</i>       | JN046380 |
| Gymnosperms | Pinaceae | <i>Pinus</i>       | <i>Pinus yunnanensis</i>       | JN046381 |
| Gymnosperms | Pinaceae | <i>Pinus</i>       | <i>Pinus yunnanensis</i>       | JN046382 |
| Gymnosperms | Pinaceae | <i>Pinus</i>       | <i>Pinus yunnanensis</i>       | JN046383 |
| Gymnosperms | Pinaceae | <i>Pinus</i>       | <i>Pinus yunnanensis</i>       | JN046384 |
| Gymnosperms | Pinaceae | <i>Pinus</i>       | <i>Pinus yunnanensis</i>       | HQ849865 |
| Gymnosperms | Pinaceae | <i>Pinus</i>       | <i>Pinus armandii</i>          | JN046330 |
| Gymnosperms | Pinaceae | <i>Pinus</i>       | <i>Pinus armandii</i>          | JN046331 |
| Gymnosperms | Pinaceae | <i>Pinus</i>       | <i>Pinus armandii</i>          | JN046332 |
| Gymnosperms | Pinaceae | <i>Pinus</i>       | <i>Pinus armandii</i>          | JN046333 |
| Gymnosperms | Pinaceae | <i>Pinus</i>       | <i>Pinus armandii</i>          | JN046334 |
| Gymnosperms | Pinaceae | <i>Pinus</i>       | <i>Pinus armandii</i>          | HQ849869 |
| Gymnosperms | Taxaceae | <i>Amentotaxus</i> | <i>Amentotaxus yunnanensis</i> | GQ435020 |
| Gymnosperms | Taxaceae | <i>Amentotaxus</i> | <i>Amentotaxus yunnanensis</i> | EF660681 |
| Gymnosperms | Taxaceae | <i>Amentotaxus</i> | <i>Amentotaxus yunnanensis</i> | JN043922 |
| Gymnosperms | Taxaceae | <i>Amentotaxus</i> | <i>Amentotaxus yunnanensis</i> | JN043923 |
| Gymnosperms | Pinaceae | <i>Picea</i>       | <i>Picea morrisonicola</i>     | HQ114829 |
| Gymnosperms | Pinaceae | <i>Picea</i>       | <i>Picea morrisonicola</i>     | HQ114882 |
| Gymnosperms | Pinaceae | <i>Abies</i>       | <i>Abies fabri</i>             | JN043665 |
| Gymnosperms | Pinaceae | <i>Abies</i>       | <i>Abies fabri</i>             | JN043666 |
| Gymnosperms | Pinaceae | <i>Abies</i>       | <i>Abies fabri</i>             | JN043667 |
| Gymnosperms | Pinaceae | <i>Abies</i>       | <i>Abies fabri</i>             | JN043668 |
| Gymnosperms | Pinaceae | <i>Abies</i>       | <i>Abies fabri</i>             | JN043669 |
| Gymnosperms | Pinaceae | <i>Abies</i>       | <i>Abies fabri</i>             | HQ833528 |
| Gymnosperms | Pinaceae | <i>Abies</i>       | <i>Abies fabri</i>             | HQ833529 |
| Gymnosperms | Pinaceae | <i>Abies</i>       | <i>Abies fabri</i>             | HQ833530 |
| Gymnosperms | Pinaceae | <i>Abies</i>       | <i>Abies fabri</i>             | HQ833531 |
| Gymnosperms | Pinaceae | <i>Abies</i>       | <i>Abies fargesii</i>          | JN043670 |
| Gymnosperms | Pinaceae | <i>Abies</i>       | <i>Abies fargesii</i>          | JN043671 |
| Gymnosperms | Pinaceae | <i>Abies</i>       | <i>Abies fargesii</i>          | JN043672 |
| Gymnosperms | Pinaceae | <i>Abies</i>       | <i>Abies fargesii</i>          | JN043673 |
| Gymnosperms | Pinaceae | <i>Abies</i>       | <i>Abies fargesii</i>          | JN043674 |
| Gymnosperms | Pinaceae | <i>Abies</i>       | <i>Abies fargesii</i>          | HQ833540 |
| Gymnosperms | Pinaceae | <i>Abies</i>       | <i>Abies fargesii</i>          | HQ833541 |
| Gymnosperms | Pinaceae | <i>Abies</i>       | <i>Abies fargesii</i>          | HQ833542 |
| Gymnosperms | Pinaceae | <i>Abies</i>       | <i>Abies fargesii</i>          | HQ833543 |
| Gymnosperms | Pinaceae | <i>Abies</i>       | <i>Abies holophylla</i>        | JN043688 |
| Gymnosperms | Pinaceae | <i>Abies</i>       | <i>Abies holophylla</i>        | JN043689 |
| Gymnosperms | Pinaceae | <i>Abies</i>       | <i>Abies holophylla</i>        | JN043690 |
| Gymnosperms | Pinaceae | <i>Abies</i>       | <i>Abies holophylla</i>        | JN043691 |
| Gymnosperms | Pinaceae | <i>Abies</i>       | <i>Abies holophylla</i>        | JN043692 |

|             |               |                   |                            |          |
|-------------|---------------|-------------------|----------------------------|----------|
| Gymnosperms | Pinaceae      | <i>Abies</i>      | <i>Abies holophylla</i>    | HQ833549 |
| Gymnosperms | Pinaceae      | <i>Abies</i>      | <i>Abies nephrolepis</i>   | JN043693 |
| Gymnosperms | Pinaceae      | <i>Abies</i>      | <i>Abies nephrolepis</i>   | JN043694 |
| Gymnosperms | Pinaceae      | <i>Abies</i>      | <i>Abies nephrolepis</i>   | JN043695 |
| Gymnosperms | Pinaceae      | <i>Abies</i>      | <i>Abies nephrolepis</i>   | JN043696 |
| Gymnosperms | Pinaceae      | <i>Abies</i>      | <i>Abies nephrolepis</i>   | JN043697 |
| Gymnosperms | Pinaceae      | <i>Abies</i>      | <i>Abies nephrolepis</i>   | HQ833547 |
| Gymnosperms | Pinaceae      | <i>Abies</i>      | <i>Abies nephrolepis</i>   | HQ833548 |
| Gymnosperms | Taxaceae      | <i>Taxus</i>      | <i>Taxus cuspidata</i>     | DQ888579 |
| Gymnosperms | Taxaceae      | <i>Taxus</i>      | <i>Taxus cuspidata</i>     | GQ435016 |
| Gymnosperms | Taxaceae      | <i>Taxus</i>      | <i>Taxus cuspidata</i>     | EF660682 |
| Gymnosperms | Taxaceae      | <i>Taxus</i>      | <i>Taxus cuspidata</i>     | HM591103 |
| Gymnosperms | Taxaceae      | <i>Taxus</i>      | <i>Taxus cuspidata</i>     | HM591104 |
| Gymnosperms | Taxaceae      | <i>Taxus</i>      | <i>Taxus cuspidata</i>     | HM591105 |
| Gymnosperms | Pinaceae      | <i>Picea</i>      | <i>Picea breweriana</i>    | HQ114874 |
| Gymnosperms | Pinaceae      | <i>Picea</i>      | <i>Picea breweriana</i>    | HQ114879 |
| Gymnosperms | Podocarpaceae | <i>Podocarpus</i> | <i>Podocarpus matudae</i>  | HM036081 |
| Gymnosperms | Podocarpaceae | <i>Podocarpus</i> | <i>Podocarpus matudae</i>  | HM036082 |
| Gymnosperms | Podocarpaceae | <i>Podocarpus</i> | <i>Podocarpus matudae</i>  | HM036083 |
| Gymnosperms | Podocarpaceae | <i>Podocarpus</i> | <i>Podocarpus matudae</i>  | HM036084 |
| Gymnosperms | Podocarpaceae | <i>Podocarpus</i> | <i>Podocarpus matudae</i>  | HM036085 |
| Gymnosperms | Podocarpaceae | <i>Podocarpus</i> | <i>Podocarpus matudae</i>  | HM036086 |
| Gymnosperms | Podocarpaceae | <i>Podocarpus</i> | <i>Podocarpus matudae</i>  | HM036087 |
| Gymnosperms | Podocarpaceae | <i>Podocarpus</i> | <i>Podocarpus matudae</i>  | HM036088 |
| Gymnosperms | Podocarpaceae | <i>Podocarpus</i> | <i>Podocarpus matudae</i>  | HM036089 |
| Gymnosperms | Podocarpaceae | <i>Podocarpus</i> | <i>Podocarpus matudae</i>  | HM036090 |
| Gymnosperms | Podocarpaceae | <i>Podocarpus</i> | <i>Podocarpus matudae</i>  | HM036091 |
| Gymnosperms | Pinaceae      | <i>Picea</i>      | <i>Picea smithiana</i>     | JN046305 |
| Gymnosperms | Pinaceae      | <i>Picea</i>      | <i>Picea smithiana</i>     | JN046306 |
| Gymnosperms | Pinaceae      | <i>Picea</i>      | <i>Picea smithiana</i>     | JN046307 |
| Gymnosperms | Pinaceae      | <i>Picea</i>      | <i>Picea smithiana</i>     | JN046308 |
| Gymnosperms | Pinaceae      | <i>Picea</i>      | <i>Picea smithiana</i>     | HQ114859 |
| Gymnosperms | Pinaceae      | <i>Picea</i>      | <i>Picea smithiana</i>     | HQ114891 |
| Gymnosperms | Pinaceae      | <i>Abies</i>      | <i>Abies beshanzuensis</i> | JN043643 |
| Gymnosperms | Pinaceae      | <i>Abies</i>      | <i>Abies beshanzuensis</i> | JN043644 |
| Gymnosperms | Pinaceae      | <i>Abies</i>      | <i>Abies beshanzuensis</i> | HQ833553 |
| Gymnosperms | Taxaceae      | <i>Taxus</i>      | <i>Taxus globosa</i>       | GQ463511 |
| Gymnosperms | Taxaceae      | <i>Taxus</i>      | <i>Taxus globosa</i>       | EF660673 |
| Gymnosperms | Pinaceae      | <i>Picea</i>      | <i>Picea wilsonii</i>      | GQ463535 |
| Gymnosperms | Pinaceae      | <i>Picea</i>      | <i>Picea wilsonii</i>      | JN046311 |
| Gymnosperms | Pinaceae      | <i>Picea</i>      | <i>Picea wilsonii</i>      | JN046312 |
| Gymnosperms | Pinaceae      | <i>Picea</i>      | <i>Picea wilsonii</i>      | JN046313 |
| Gymnosperms | Pinaceae      | <i>Picea</i>      | <i>Picea wilsonii</i>      | JN046314 |
| Gymnosperms | Pinaceae      | <i>Picea</i>      | <i>Picea wilsonii</i>      | HQ114830 |
| Gymnosperms | Pinaceae      | <i>Picea</i>      | <i>Picea wilsonii</i>      | HQ114871 |
| Gymnosperms | Pinaceae      | <i>Picea</i>      | <i>Picea asperata</i>      | JN046239 |
| Gymnosperms | Pinaceae      | <i>Picea</i>      | <i>Picea asperata</i>      | JN046240 |
| Gymnosperms | Pinaceae      | <i>Picea</i>      | <i>Picea asperata</i>      | JN046241 |
| Gymnosperms | Pinaceae      | <i>Picea</i>      | <i>Picea asperata</i>      | JN046242 |
| Gymnosperms | Pinaceae      | <i>Picea</i>      | <i>Picea asperata</i>      | JN046243 |
| Gymnosperms | Pinaceae      | <i>Picea</i>      | <i>Picea asperata</i>      | HQ114844 |
| Gymnosperms | Pinaceae      | <i>Picea</i>      | <i>Picea asperata</i>      | HQ114845 |
| Gymnosperms | Pinaceae      | <i>Picea</i>      | <i>Picea asperata</i>      | HQ114865 |

|             |             |                |                            |          |
|-------------|-------------|----------------|----------------------------|----------|
| Gymnosperms | Pinaceae    | <i>Picea</i>   | <i>Picea schrenkiana</i>   | JN046300 |
| Gymnosperms | Pinaceae    | <i>Picea</i>   | <i>Picea schrenkiana</i>   | JN046301 |
| Gymnosperms | Pinaceae    | <i>Picea</i>   | <i>Picea schrenkiana</i>   | JN046302 |
| Gymnosperms | Pinaceae    | <i>Picea</i>   | <i>Picea schrenkiana</i>   | JN046303 |
| Gymnosperms | Pinaceae    | <i>Picea</i>   | <i>Picea schrenkiana</i>   | JN046304 |
| Gymnosperms | Pinaceae    | <i>Picea</i>   | <i>Picea schrenkiana</i>   | HQ114838 |
| Gymnosperms | Pinaceae    | <i>Picea</i>   | <i>Picea schrenkiana</i>   | HQ114839 |
| Gymnosperms | Pinaceae    | <i>Picea</i>   | <i>Picea spinulosa</i>     | JN046309 |
| Gymnosperms | Pinaceae    | <i>Picea</i>   | <i>Picea spinulosa</i>     | JN046310 |
| Gymnosperms | Pinaceae    | <i>Picea</i>   | <i>Picea spinulosa</i>     | HQ114878 |
| Gymnosperms | Pinaceae    | <i>Picea</i>   | <i>Picea spinulosa</i>     | HQ114892 |
| Gymnosperms | Ephedraceae | <i>Ephedra</i> | <i>Ephedra monosperma</i>  | JN044472 |
| Gymnosperms | Ephedraceae | <i>Ephedra</i> | <i>Ephedra monosperma</i>  | JN044473 |
| Gymnosperms | Ephedraceae | <i>Ephedra</i> | <i>Ephedra frustillata</i> | GQ248296 |
| Gymnosperms | Ephedraceae | <i>Ephedra</i> | <i>Ephedra frustillata</i> | AY849355 |
| Gymnosperms | Ephedraceae | <i>Ephedra</i> | <i>Ephedra intermedia</i>  | JN044470 |
| Gymnosperms | Ephedraceae | <i>Ephedra</i> | <i>Ephedra intermedia</i>  | JN044471 |
| Gymnosperms | Ephedraceae | <i>Ephedra</i> | <i>Ephedra equisetina</i>  | GQ435179 |
| Gymnosperms | Ephedraceae | <i>Ephedra</i> | <i>Ephedra equisetina</i>  | GQ435180 |
| Gymnosperms | Ephedraceae | <i>Ephedra</i> | <i>Ephedra equisetina</i>  | AY849352 |
| Gymnosperms | Pinaceae    | <i>Pinus</i>   | <i>Pinus densata</i>       | JN046335 |
| Gymnosperms | Pinaceae    | <i>Pinus</i>   | <i>Pinus densata</i>       | JN046336 |
| Gymnosperms | Pinaceae    | <i>Pinus</i>   | <i>Pinus densata</i>       | JN046337 |
| Gymnosperms | Pinaceae    | <i>Pinus</i>   | <i>Pinus densata</i>       | JN046338 |
| Gymnosperms | Pinaceae    | <i>Pinus</i>   | <i>Pinus densata</i>       | JN046339 |
| Gymnosperms | Pinaceae    | <i>Pinus</i>   | <i>Pinus densata</i>       | JN046340 |
| Gymnosperms | Pinaceae    | <i>Pinus</i>   | <i>Pinus densata</i>       | JN046341 |
| Gymnosperms | Pinaceae    | <i>Pinus</i>   | <i>Pinus densata</i>       | JN046342 |
| Gymnosperms | Pinaceae    | <i>Pinus</i>   | <i>Pinus densata</i>       | JN046343 |
| Gymnosperms | Pinaceae    | <i>Pinus</i>   | <i>Pinus densata</i>       | JN046344 |
| Gymnosperms | Pinaceae    | <i>Pinus</i>   | <i>Pinus taiwanensis</i>   | JN046365 |
| Gymnosperms | Pinaceae    | <i>Pinus</i>   | <i>Pinus taiwanensis</i>   | JN046366 |
| Gymnosperms | Pinaceae    | <i>Pinus</i>   | <i>Pinus taiwanensis</i>   | JN046367 |
| Gymnosperms | Pinaceae    | <i>Pinus</i>   | <i>Pinus taiwanensis</i>   | JN046368 |
| Gymnosperms | Pinaceae    | <i>Pinus</i>   | <i>Pinus taiwanensis</i>   | JN046369 |
| Gymnosperms | Ephedraceae | <i>Ephedra</i> | <i>Ephedra regeliana</i>   | JN044474 |
| Gymnosperms | Ephedraceae | <i>Ephedra</i> | <i>Ephedra regeliana</i>   | JN044475 |
| Gymnosperms | Pinaceae    | <i>Picea</i>   | <i>Picea likiangensis</i>  | HQ114836 |
| Gymnosperms | Pinaceae    | <i>Picea</i>   | <i>Picea likiangensis</i>  | HQ114837 |
| Gymnosperms | Pinaceae    | <i>Picea</i>   | <i>Picea likiangensis</i>  | HQ114846 |
| Gymnosperms | Pinaceae    | <i>Picea</i>   | <i>Picea likiangensis</i>  | HQ114849 |
| Gymnosperms | Pinaceae    | <i>Picea</i>   | <i>Picea likiangensis</i>  | HQ114850 |
| Gymnosperms | Pinaceae    | <i>Picea</i>   | <i>Picea likiangensis</i>  | HQ114888 |
| Gymnosperms | Pinaceae    | <i>Picea</i>   | <i>Picea koraiensis</i>    | JN046263 |
| Gymnosperms | Pinaceae    | <i>Picea</i>   | <i>Picea koraiensis</i>    | JN046264 |
| Gymnosperms | Pinaceae    | <i>Picea</i>   | <i>Picea koraiensis</i>    | JN046265 |
| Gymnosperms | Pinaceae    | <i>Picea</i>   | <i>Picea koraiensis</i>    | JN046266 |
| Gymnosperms | Pinaceae    | <i>Picea</i>   | <i>Picea koraiensis</i>    | JN046267 |
| Gymnosperms | Pinaceae    | <i>Picea</i>   | <i>Picea koraiensis</i>    | HQ114843 |
| Gymnosperms | Pinaceae    | <i>Picea</i>   | <i>Picea meyeri</i>        | GQ463527 |
| Gymnosperms | Pinaceae    | <i>Picea</i>   | <i>Picea meyeri</i>        | GQ463528 |
| Gymnosperms | Pinaceae    | <i>Picea</i>   | <i>Picea meyeri</i>        | GQ865744 |
| Gymnosperms | Pinaceae    | <i>Picea</i>   | <i>Picea meyeri</i>        | JN046282 |



|             |          |              |                          |          |
|-------------|----------|--------------|--------------------------|----------|
| Gymnosperms | Pinaceae | <i>Picea</i> | <i>Picea meyeri</i>      | JN046283 |
| Gymnosperms | Pinaceae | <i>Picea</i> | <i>Picea meyeri</i>      | JN046284 |
| Gymnosperms | Pinaceae | <i>Picea</i> | <i>Picea meyeri</i>      | JN046285 |
| Gymnosperms | Pinaceae | <i>Picea</i> | <i>Picea meyeri</i>      | JN046286 |
| Gymnosperms | Pinaceae | <i>Picea</i> | <i>Picea meyeri</i>      | HQ114861 |
| Gymnosperms | Pinaceae | <i>Picea</i> | <i>Picea meyeri</i>      | HQ114884 |
| Gymnosperms | Pinaceae | <i>Picea</i> | <i>Picea meyeri</i>      | HQ114885 |
| Gymnosperms | Pinaceae | <i>Picea</i> | <i>Picea meyeri</i>      | HQ114886 |
| Gymnosperms | Pinaceae | <i>Picea</i> | <i>Picea meyeri</i>      | HQ114887 |
| Gymnosperms | Pinaceae | <i>Picea</i> | <i>Picea meyeri</i>      | HQ114889 |
| Gymnosperms | Pinaceae | <i>Picea</i> | <i>Picea brachytyla</i>  | JN046244 |
| Gymnosperms | Pinaceae | <i>Picea</i> | <i>Picea brachytyla</i>  | JN046245 |
| Gymnosperms | Pinaceae | <i>Picea</i> | <i>Picea brachytyla</i>  | JN046246 |
| Gymnosperms | Pinaceae | <i>Picea</i> | <i>Picea brachytyla</i>  | JN046247 |
| Gymnosperms | Pinaceae | <i>Picea</i> | <i>Picea brachytyla</i>  | HQ114847 |
| Gymnosperms | Pinaceae | <i>Picea</i> | <i>Picea brachytyla</i>  | HQ114856 |
| Gymnosperms | Pinaceae | <i>Picea</i> | <i>Picea purpurea</i>    | JN046295 |
| Gymnosperms | Pinaceae | <i>Picea</i> | <i>Picea purpurea</i>    | JN046296 |
| Gymnosperms | Pinaceae | <i>Picea</i> | <i>Picea purpurea</i>    | JN046297 |
| Gymnosperms | Pinaceae | <i>Picea</i> | <i>Picea purpurea</i>    | JN046298 |
| Gymnosperms | Pinaceae | <i>Picea</i> | <i>Picea purpurea</i>    | JN046299 |
| Gymnosperms | Pinaceae | <i>Picea</i> | <i>Picea purpurea</i>    | HQ114851 |
| Gymnosperms | Pinaceae | <i>Picea</i> | <i>Picea purpurea</i>    | HQ114852 |
| Gymnosperms | Pinaceae | <i>Picea</i> | <i>Picea purpurea</i>    | HQ114853 |
| Gymnosperms | Pinaceae | <i>Picea</i> | <i>Picea crassifolia</i> | JN046253 |
| Gymnosperms | Pinaceae | <i>Picea</i> | <i>Picea crassifolia</i> | JN046254 |
| Gymnosperms | Pinaceae | <i>Picea</i> | <i>Picea crassifolia</i> | JN046255 |
| Gymnosperms | Pinaceae | <i>Picea</i> | <i>Picea crassifolia</i> | JN046256 |
| Gymnosperms | Pinaceae | <i>Picea</i> | <i>Picea crassifolia</i> | JN046257 |
| Gymnosperms | Pinaceae | <i>Picea</i> | <i>Picea crassifolia</i> | HQ114890 |
| Gymnosperms | Pinaceae | <i>Picea</i> | <i>Picea obovata</i>     | JN046290 |
| Gymnosperms | Pinaceae | <i>Picea</i> | <i>Picea obovata</i>     | JN046291 |
| Gymnosperms | Pinaceae | <i>Picea</i> | <i>Picea obovata</i>     | JN046292 |
| Gymnosperms | Pinaceae | <i>Picea</i> | <i>Picea obovata</i>     | JN046293 |
| Gymnosperms | Pinaceae | <i>Picea</i> | <i>Picea obovata</i>     | JN046294 |
| Gymnosperms | Pinaceae | <i>Picea</i> | <i>Picea obovata</i>     | HQ114840 |
| Gymnosperms | Pinaceae | <i>Picea</i> | <i>Picea obovata</i>     | HQ114841 |
| Gymnosperms | Pinaceae | <i>Picea</i> | <i>Picea obovata</i>     | HQ114842 |
| Gymnosperms | Pinaceae | <i>Picea</i> | <i>Picea obovata</i>     | HQ114883 |
| Gymnosperms | Pinaceae | <i>Abies</i> | <i>Abies spectabilis</i> | JN043703 |
| Gymnosperms | Pinaceae | <i>Abies</i> | <i>Abies spectabilis</i> | JN043704 |
| Gymnosperms | Pinaceae | <i>Abies</i> | <i>Abies spectabilis</i> | JN043705 |
| Gymnosperms | Pinaceae | <i>Abies</i> | <i>Abies spectabilis</i> | JN043706 |
| Gymnosperms | Pinaceae | <i>Abies</i> | <i>Abies spectabilis</i> | JN043707 |
| Gymnosperms | Pinaceae | <i>Abies</i> | <i>Abies spectabilis</i> | HQ833523 |
| Gymnosperms | Pinaceae | <i>Abies</i> | <i>Abies spectabilis</i> | HQ833524 |
| Gymnosperms | Pinaceae | <i>Picea</i> | <i>Picea neveitchii</i>  | JN046287 |
| Gymnosperms | Pinaceae | <i>Picea</i> | <i>Picea neveitchii</i>  | JN046288 |
| Gymnosperms | Pinaceae | <i>Picea</i> | <i>Picea neveitchii</i>  | JN046289 |
| Gymnosperms | Pinaceae | <i>Picea</i> | <i>Picea neveitchii</i>  | HQ114870 |
| Gymnosperms | Pinaceae | <i>Picea</i> | <i>Picea farreri</i>     | JN046258 |
| Gymnosperms | Pinaceae | <i>Picea</i> | <i>Picea farreri</i>     | JN046259 |
| Gymnosperms | Pinaceae | <i>Picea</i> | <i>Picea farreri</i>     | HQ114831 |

|             |          |              |                          |          |
|-------------|----------|--------------|--------------------------|----------|
| Gymnosperms | Pinaceae | <i>Picea</i> | <i>Picea farreri</i>     | HQ114872 |
| Gymnosperms | Pinaceae | <i>Picea</i> | <i>Picea farreri</i>     | HQ114873 |
| Gymnosperms | Pinaceae | <i>Picea</i> | <i>Picea farreri</i>     | HQ114880 |
| Gymnosperms | Pinaceae | <i>Abies</i> | <i>Abies chensiensis</i> | JN043645 |
| Gymnosperms | Pinaceae | <i>Abies</i> | <i>Abies chensiensis</i> | JN043646 |
| Gymnosperms | Pinaceae | <i>Abies</i> | <i>Abies chensiensis</i> | JN043647 |
| Gymnosperms | Pinaceae | <i>Abies</i> | <i>Abies chensiensis</i> | JN043648 |
| Gymnosperms | Pinaceae | <i>Abies</i> | <i>Abies chensiensis</i> | JN043649 |
| Gymnosperms | Pinaceae | <i>Abies</i> | <i>Abies chensiensis</i> | HQ833544 |
| Gymnosperms | Pinaceae | <i>Abies</i> | <i>Abies chensiensis</i> | HQ833545 |
| Gymnosperms | Pinaceae | <i>Abies</i> | <i>Abies chensiensis</i> | HQ833546 |
| Gymnosperms | Pinaceae | <i>Abies</i> | <i>Abies delavayi</i>    | JN043650 |
| Gymnosperms | Pinaceae | <i>Abies</i> | <i>Abies delavayi</i>    | JN043651 |
| Gymnosperms | Pinaceae | <i>Abies</i> | <i>Abies delavayi</i>    | JN043652 |
| Gymnosperms | Pinaceae | <i>Abies</i> | <i>Abies delavayi</i>    | JN043653 |
| Gymnosperms | Pinaceae | <i>Abies</i> | <i>Abies delavayi</i>    | JN043654 |
| Gymnosperms | Pinaceae | <i>Abies</i> | <i>Abies delavayi</i>    | HQ833557 |
| Gymnosperms | Pinaceae | <i>Abies</i> | <i>Abies delavayi</i>    | HQ833558 |
| Gymnosperms | Pinaceae | <i>Abies</i> | <i>Abies densa</i>       | JN043655 |
| Gymnosperms | Pinaceae | <i>Abies</i> | <i>Abies densa</i>       | JN043656 |
| Gymnosperms | Pinaceae | <i>Abies</i> | <i>Abies densa</i>       | JN043657 |
| Gymnosperms | Pinaceae | <i>Abies</i> | <i>Abies densa</i>       | JN043658 |
| Gymnosperms | Pinaceae | <i>Abies</i> | <i>Abies densa</i>       | JN043659 |
| Gymnosperms | Pinaceae | <i>Abies</i> | <i>Abies densa</i>       | HQ833555 |
| Gymnosperms | Pinaceae | <i>Abies</i> | <i>Abies densa</i>       | HQ833556 |
| Gymnosperms | Pinaceae | <i>Abies</i> | <i>Abies forrestii</i>   | JN043678 |
| Gymnosperms | Pinaceae | <i>Abies</i> | <i>Abies forrestii</i>   | JN043679 |
| Gymnosperms | Pinaceae | <i>Abies</i> | <i>Abies forrestii</i>   | JN043680 |
| Gymnosperms | Pinaceae | <i>Abies</i> | <i>Abies forrestii</i>   | JN043681 |
| Gymnosperms | Pinaceae | <i>Abies</i> | <i>Abies forrestii</i>   | JN043682 |
| Gymnosperms | Pinaceae | <i>Abies</i> | <i>Abies forrestii</i>   | HQ833532 |
| Gymnosperms | Pinaceae | <i>Abies</i> | <i>Abies forrestii</i>   | HQ833533 |
| Gymnosperms | Pinaceae | <i>Abies</i> | <i>Abies forrestii</i>   | HQ833534 |
| Gymnosperms | Pinaceae | <i>Abies</i> | <i>Abies forrestii</i>   | HQ833535 |
| Gymnosperms | Pinaceae | <i>Abies</i> | <i>Abies ziyuanensis</i> | JN043627 |
| Gymnosperms | Pinaceae | <i>Abies</i> | <i>Abies ziyuanensis</i> | JN043628 |
| Gymnosperms | Pinaceae | <i>Abies</i> | <i>Abies ziyuanensis</i> | JN043629 |
| Gymnosperms | Pinaceae | <i>Abies</i> | <i>Abies ziyuanensis</i> | JN043630 |
| Gymnosperms | Pinaceae | <i>Abies</i> | <i>Abies ziyuanensis</i> | JN043631 |
| Gymnosperms | Pinaceae | <i>Abies</i> | <i>Abies ziyuanensis</i> | HQ833551 |
| Gymnosperms | Pinaceae | <i>Abies</i> | <i>Abies ziyuanensis</i> | HQ833552 |
| Gymnosperms | Taxaceae | <i>Taxus</i> | <i>Taxus fuana</i>       | GQ435018 |
| Gymnosperms | Taxaceae | <i>Taxus</i> | <i>Taxus fuana</i>       | EF660685 |
| Gymnosperms | Taxaceae | <i>Taxus</i> | <i>Taxus fuana</i>       | HM591106 |
| Gymnosperms | Taxaceae | <i>Taxus</i> | <i>Taxus fuana</i>       | HM591107 |
| Gymnosperms | Taxaceae | <i>Taxus</i> | <i>Taxus fuana</i>       | HM591108 |
| Gymnosperms | Taxaceae | <i>Taxus</i> | <i>Taxus fuana</i>       | HM591109 |
| Gymnosperms | Taxaceae | <i>Taxus</i> | <i>Taxus fuana</i>       | HM591110 |
| Gymnosperms | Taxaceae | <i>Taxus</i> | <i>Taxus sumatrana</i>   | GQ463509 |
| Gymnosperms | Taxaceae | <i>Taxus</i> | <i>Taxus sumatrana</i>   | EF660672 |
| Gymnosperms | Taxaceae | <i>Taxus</i> | <i>Taxus sumatrana</i>   | HM591098 |
| Gymnosperms | Taxaceae | <i>Taxus</i> | <i>Taxus sumatrana</i>   | HM591099 |
| Gymnosperms | Taxaceae | <i>Taxus</i> | <i>Taxus sumatrana</i>   | HM591100 |

|             |          |                    |                               |          |
|-------------|----------|--------------------|-------------------------------|----------|
| Gymnosperms | Taxaceae | <i>Taxus</i>       | <i>Taxus sumatrana</i>        | HM591101 |
| Gymnosperms | Taxaceae | <i>Taxus</i>       | <i>Taxus sumatrana</i>        | HM591102 |
| Gymnosperms | Pinaceae | <i>Abies</i>       | <i>Abies fanjingshanensis</i> | JN043640 |
| Gymnosperms | Pinaceae | <i>Abies</i>       | <i>Abies fanjingshanensis</i> | JN043641 |
| Gymnosperms | Pinaceae | <i>Abies</i>       | <i>Abies fanjingshanensis</i> | JN043642 |
| Gymnosperms | Pinaceae | <i>Abies</i>       | <i>Abies fanjingshanensis</i> | HQ833550 |
| Gymnosperms | Pinaceae | <i>Abies</i>       | <i>Abies yuanbaoshanensis</i> | JN043632 |
| Gymnosperms | Pinaceae | <i>Abies</i>       | <i>Abies yuanbaoshanensis</i> | JN043633 |
| Gymnosperms | Pinaceae | <i>Abies</i>       | <i>Abies yuanbaoshanensis</i> | JN043634 |
| Gymnosperms | Pinaceae | <i>Abies</i>       | <i>Abies yuanbaoshanensis</i> | HQ833554 |
| Gymnosperms | Pinaceae | <i>Pinus</i>       | <i>Pinus latteri</i>          | JN046350 |
| Gymnosperms | Pinaceae | <i>Pinus</i>       | <i>Pinus latteri</i>          | JN046351 |
| Gymnosperms | Pinaceae | <i>Pinus</i>       | <i>Pinus latteri</i>          | JN046352 |
| Gymnosperms | Pinaceae | <i>Pinus</i>       | <i>Pinus latteri</i>          | JN046353 |
| Gymnosperms | Pinaceae | <i>Pinus</i>       | <i>Pinus latteri</i>          | JN046354 |
| Gymnosperms | Pinaceae | <i>Pinus</i>       | <i>Pinus latteri</i>          | HQ849866 |
| Gymnosperms | Pinaceae | <i>Pinus</i>       | <i>Pinus latteri</i>          | HQ849867 |
| Gymnosperms | Pinaceae | <i>Pinus</i>       | <i>Pinus latteri</i>          | HQ849868 |
| Gymnosperms | Pinaceae | <i>Abies</i>       | <i>Abies ernestii</i>         | JN043660 |
| Gymnosperms | Pinaceae | <i>Abies</i>       | <i>Abies ernestii</i>         | JN043661 |
| Gymnosperms | Pinaceae | <i>Abies</i>       | <i>Abies ernestii</i>         | JN043662 |
| Gymnosperms | Pinaceae | <i>Abies</i>       | <i>Abies ernestii</i>         | JN043663 |
| Gymnosperms | Pinaceae | <i>Abies</i>       | <i>Abies ernestii</i>         | JN043664 |
| Gymnosperms | Pinaceae | <i>Abies</i>       | <i>Abies ferreana</i>         | JN043675 |
| Gymnosperms | Pinaceae | <i>Abies</i>       | <i>Abies ferreana</i>         | JN043676 |
| Gymnosperms | Pinaceae | <i>Abies</i>       | <i>Abies ferreana</i>         | JN043677 |
| Gymnosperms | Pinaceae | <i>Abies</i>       | <i>Abies ferreana</i>         | HQ833559 |
| Gymnosperms | Pinaceae | <i>Abies</i>       | <i>Abies georgei</i>          | JN043683 |
| Gymnosperms | Pinaceae | <i>Abies</i>       | <i>Abies georgei</i>          | JN043684 |
| Gymnosperms | Pinaceae | <i>Abies</i>       | <i>Abies georgei</i>          | JN043685 |
| Gymnosperms | Pinaceae | <i>Abies</i>       | <i>Abies georgei</i>          | JN043686 |
| Gymnosperms | Pinaceae | <i>Abies</i>       | <i>Abies georgei</i>          | JN043687 |
| Gymnosperms | Pinaceae | <i>Abies</i>       | <i>Abies georgei</i>          | HQ833521 |
| Gymnosperms | Pinaceae | <i>Abies</i>       | <i>Abies georgei</i>          | HQ833522 |
| Gymnosperms | Pinaceae | <i>Abies</i>       | <i>Abies recurvata</i>        | JN043698 |
| Gymnosperms | Pinaceae | <i>Abies</i>       | <i>Abies recurvata</i>        | JN043699 |
| Gymnosperms | Pinaceae | <i>Abies</i>       | <i>Abies recurvata</i>        | JN043700 |
| Gymnosperms | Pinaceae | <i>Abies</i>       | <i>Abies recurvata</i>        | JN043701 |
| Gymnosperms | Pinaceae | <i>Abies</i>       | <i>Abies recurvata</i>        | JN043702 |
| Gymnosperms | Pinaceae | <i>Abies</i>       | <i>Abies recurvata</i>        | HQ833516 |
| Gymnosperms | Pinaceae | <i>Abies</i>       | <i>Abies recurvata</i>        | HQ833517 |
| Gymnosperms | Pinaceae | <i>Abies</i>       | <i>Abies squamata</i>         | JN043708 |
| Gymnosperms | Pinaceae | <i>Abies</i>       | <i>Abies squamata</i>         | JN043709 |
| Gymnosperms | Pinaceae | <i>Abies</i>       | <i>Abies squamata</i>         | JN043710 |
| Gymnosperms | Pinaceae | <i>Abies</i>       | <i>Abies squamata</i>         | JN043711 |
| Gymnosperms | Pinaceae | <i>Abies</i>       | <i>Abies squamata</i>         | JN043712 |
| Gymnosperms | Pinaceae | <i>Abies</i>       | <i>Abies squamata</i>         | HQ833518 |
| Gymnosperms | Pinaceae | <i>Abies</i>       | <i>Abies squamata</i>         | HQ833519 |
| Gymnosperms | Pinaceae | <i>Abies</i>       | <i>Abies squamata</i>         | HQ833520 |
| Gymnosperms | Taxaceae | <i>Amentotaxus</i> | <i>Amentotaxus poilanei</i>   | JN043918 |
| Gymnosperms | Taxaceae | <i>Amentotaxus</i> | <i>Amentotaxus poilanei</i>   | JN043919 |
| Gymnosperms | Taxaceae | <i>Amentotaxus</i> | <i>Amentotaxus poilanei</i>   | JN043920 |
| Gymnosperms | Taxaceae | <i>Amentotaxus</i> | <i>Amentotaxus poilanei</i>   | JN043921 |

|             |                 |                     |                                  |          |
|-------------|-----------------|---------------------|----------------------------------|----------|
| Gymnosperms | Pinaceae        | <i>Abies</i>        | <i>Abies sp. LiujqAB21</i>       | HQ833525 |
| Gymnosperms | Pinaceae        | <i>Abies</i>        | <i>Abies sp. LiujqAB21</i>       | HQ833526 |
| Gymnosperms | Pinaceae        | <i>Abies</i>        | <i>Abies sp. LiujqAB21</i>       | HQ833527 |
| Gymnosperms | Pinaceae        | <i>Abies</i>        | <i>Abies nukiangensis</i>        | JN043635 |
| Gymnosperms | Pinaceae        | <i>Abies</i>        | <i>Abies nukiangensis</i>        | JN043636 |
| Gymnosperms | Pinaceae        | <i>Abies</i>        | <i>Abies nukiangensis</i>        | JN043637 |
| Gymnosperms | Pinaceae        | <i>Abies</i>        | <i>Abies nukiangensis</i>        | JN043638 |
| Gymnosperms | Pinaceae        | <i>Abies</i>        | <i>Abies nukiangensis</i>        | JN043639 |
| Gymnosperms | Pinaceae        | <i>Abies</i>        | <i>Abies nukiangensis</i>        | HQ833536 |
| Gymnosperms | Pinaceae        | <i>Abies</i>        | <i>Abies nukiangensis</i>        | HQ833537 |
| Gymnosperms | Pinaceae        | <i>Abies</i>        | <i>Abies nukiangensis</i>        | HQ833538 |
| Gymnosperms | Pinaceae        | <i>Abies</i>        | <i>Abies nukiangensis</i>        | HQ833539 |
| Gymnosperms | Cephalotaxaceae | <i>Cephalotaxus</i> | <i>Cephalotaxus wilsoniana</i>   | GQ435300 |
| Gymnosperms | Cephalotaxaceae | <i>Cephalotaxus</i> | <i>Cephalotaxus wilsoniana</i>   | EF660674 |
| Gymnosperms | Cephalotaxaceae | <i>Cephalotaxus</i> | <i>Cephalotaxus wilsoniana</i>   | GQ865742 |
| Gymnosperms | Taxaceae        | <i>Torreya</i>      | <i>Torreya nucifera</i>          | GQ463520 |
| Gymnosperms | Taxaceae        | <i>Torreya</i>      | <i>Torreya nucifera</i>          | EF660697 |
| Gymnosperms | Cephalotaxaceae | <i>Cephalotaxus</i> | <i>Cephalotaxus harringtonia</i> | GQ463523 |
| Gymnosperms | Cephalotaxaceae | <i>Cephalotaxus</i> | <i>Cephalotaxus harringtonia</i> | EF660677 |
| Gymnosperms | Cephalotaxaceae | <i>Cephalotaxus</i> | <i>Cephalotaxus harringtonia</i> | EF660689 |
| Gymnosperms | Cephalotaxaceae | <i>Cephalotaxus</i> | <i>Cephalotaxus harringtonia</i> | GQ865743 |
| Gymnosperms | Taxaceae        | <i>Torreya</i>      | <i>Torreya grandis</i>           | GQ435473 |
| Gymnosperms | Taxaceae        | <i>Torreya</i>      | <i>Torreya grandis</i>           | GQ463537 |
| Gymnosperms | Taxaceae        | <i>Torreya</i>      | <i>Torreya grandis</i>           | EF660692 |
| Gymnosperms | Cephalotaxaceae | <i>Cephalotaxus</i> | <i>Cephalotaxus fortunei</i>     | EF660695 |
| Gymnosperms | Cephalotaxaceae | <i>Cephalotaxus</i> | <i>Cephalotaxus fortunei</i>     | JN044237 |
| Gymnosperms | Cephalotaxaceae | <i>Cephalotaxus</i> | <i>Cephalotaxus fortunei</i>     | JN044238 |
| Gymnosperms | Cephalotaxaceae | <i>Cephalotaxus</i> | <i>Cephalotaxus fortunei</i>     | JN044239 |
| Gymnosperms | Cephalotaxaceae | <i>Cephalotaxus</i> | <i>Cephalotaxus fortunei</i>     | JN044240 |
| Gymnosperms | Cephalotaxaceae | <i>Cephalotaxus</i> | <i>Cephalotaxus fortunei</i>     | JN044241 |
| Gymnosperms | Cephalotaxaceae | <i>Cephalotaxus</i> | <i>Cephalotaxus fortunei</i>     | JN044242 |
| Gymnosperms | Cephalotaxaceae | <i>Cephalotaxus</i> | <i>Cephalotaxus fortunei</i>     | JN044243 |
| Gymnosperms | Taxaceae        | <i>Torreya</i>      | <i>Torreya californica</i>       | GQ435299 |
| Gymnosperms | Taxaceae        | <i>Torreya</i>      | <i>Torreya californica</i>       | EF660699 |
| Gymnosperms | Cephalotaxaceae | <i>Cephalotaxus</i> | <i>Cephalotaxus mannii</i>       | GQ463521 |
| Gymnosperms | Cephalotaxaceae | <i>Cephalotaxus</i> | <i>Cephalotaxus mannii</i>       | EF660675 |
| Gymnosperms | Cephalotaxaceae | <i>Cephalotaxus</i> | <i>Cephalotaxus mannii</i>       | JN044249 |
| Gymnosperms | Cephalotaxaceae | <i>Cephalotaxus</i> | <i>Cephalotaxus mannii</i>       | JN044250 |
| Gymnosperms | Cephalotaxaceae | <i>Cephalotaxus</i> | <i>Cephalotaxus mannii</i>       | JN044251 |
| Gymnosperms | Cephalotaxaceae | <i>Cephalotaxus</i> | <i>Cephalotaxus mannii</i>       | JN044252 |
| Gymnosperms | Cephalotaxaceae | <i>Cephalotaxus</i> | <i>Cephalotaxus mannii</i>       | JN044253 |
| Gymnosperms | Cephalotaxaceae | <i>Cephalotaxus</i> | <i>Cephalotaxus mannii</i>       | JN044254 |
| Gymnosperms | Cephalotaxaceae | <i>Cephalotaxus</i> | <i>Cephalotaxus mannii</i>       | JN044255 |
| Gymnosperms | Cephalotaxaceae | <i>Cephalotaxus</i> | <i>Cephalotaxus mannii</i>       | JN044256 |
| Gymnosperms | Cephalotaxaceae | <i>Cephalotaxus</i> | <i>Cephalotaxus mannii</i>       | JN044257 |
| Gymnosperms | Cephalotaxaceae | <i>Cephalotaxus</i> | <i>Cephalotaxus sinensis</i>     | EF660687 |
| Gymnosperms | Cephalotaxaceae | <i>Cephalotaxus</i> | <i>Cephalotaxus sinensis</i>     | JN044260 |
| Gymnosperms | Cephalotaxaceae | <i>Cephalotaxus</i> | <i>Cephalotaxus sinensis</i>     | JN044261 |
| Gymnosperms | Cephalotaxaceae | <i>Cephalotaxus</i> | <i>Cephalotaxus sinensis</i>     | JN044262 |
| Gymnosperms | Cephalotaxaceae | <i>Cephalotaxus</i> | <i>Cephalotaxus sinensis</i>     | JN044263 |
| Gymnosperms | Cephalotaxaceae | <i>Cephalotaxus</i> | <i>Cephalotaxus sinensis</i>     | JN044264 |
| Gymnosperms | Cephalotaxaceae | <i>Cephalotaxus</i> | <i>Cephalotaxus sinensis</i>     | JN044265 |
| Gymnosperms | Cephalotaxaceae | <i>Cephalotaxus</i> | <i>Cephalotaxus sinensis</i>     | JN044266 |

|                |                  |                     |                                 |          |
|----------------|------------------|---------------------|---------------------------------|----------|
| Gymnosperms    | Cephalotaxaceae  | <i>Cephalotaxus</i> | <i>Cephalotaxus sinensis</i>    | JN044267 |
| Gymnosperms    | Cephalotaxaceae  | <i>Cephalotaxus</i> | <i>Cephalotaxus sinensis</i>    | JN044268 |
| Gymnosperms    | Cephalotaxaceae  | <i>Cephalotaxus</i> | <i>Cephalotaxus sinensis</i>    | JN044269 |
| Gymnosperms    | Cephalotaxaceae  | <i>Cephalotaxus</i> | <i>Cephalotaxus sinensis</i>    | JN044270 |
| Gymnosperms    | Cephalotaxaceae  | <i>Cephalotaxus</i> | <i>Cephalotaxus sinensis</i>    | JN044271 |
| Gymnosperms    | Taxaceae         | <i>Torreya</i>      | <i>Torreya fargesii</i>         | EF660694 |
| Gymnosperms    | Taxaceae         | <i>Torreya</i>      | <i>Torreya fargesii</i>         | JN047455 |
| Gymnosperms    | Taxaceae         | <i>Torreya</i>      | <i>Torreya fargesii</i>         | JN047456 |
| Gymnosperms    | Cephalotaxaceae  | <i>Cephalotaxus</i> | <i>Cephalotaxus oliveri</i>     | EF660701 |
| Gymnosperms    | Cephalotaxaceae  | <i>Cephalotaxus</i> | <i>Cephalotaxus oliveri</i>     | JN044258 |
| Gymnosperms    | Cephalotaxaceae  | <i>Cephalotaxus</i> | <i>Cephalotaxus oliveri</i>     | JN044259 |
| Gymnosperms    | Cephalotaxaceae  | <i>Cephalotaxus</i> | <i>Cephalotaxus hainanensis</i> | GQ435297 |
| Gymnosperms    | Cephalotaxaceae  | <i>Cephalotaxus</i> | <i>Cephalotaxus hainanensis</i> | GQ435298 |
| Gymnosperms    | Cephalotaxaceae  | <i>Cephalotaxus</i> | <i>Cephalotaxus hainanensis</i> | EF660688 |
| Gymnosperms    | Cephalotaxaceae  | <i>Cephalotaxus</i> | <i>Cephalotaxus hainanensis</i> | GQ865736 |
| Gymnosperms    | Cephalotaxaceae  | <i>Cephalotaxus</i> | <i>Cephalotaxus hainanensis</i> | GQ865737 |
| Gymnosperms    | Cephalotaxaceae  | <i>Cephalotaxus</i> | <i>Cephalotaxus hainanensis</i> | GQ865738 |
| Gymnosperms    | Cephalotaxaceae  | <i>Cephalotaxus</i> | <i>Cephalotaxus hainanensis</i> | GQ865739 |
| Gymnosperms    | Cephalotaxaceae  | <i>Cephalotaxus</i> | <i>Cephalotaxus hainanensis</i> | GQ865740 |
| Gymnosperms    | Cephalotaxaceae  | <i>Cephalotaxus</i> | <i>Cephalotaxus hainanensis</i> | GQ865741 |
| Gymnosperms    | Cephalotaxaceae  | <i>Cephalotaxus</i> | <i>Cephalotaxus drupacea</i>    | GQ435302 |
| Gymnosperms    | Cephalotaxaceae  | <i>Cephalotaxus</i> | <i>Cephalotaxus drupacea</i>    | EF660684 |
| Gymnosperms    | Cephalotaxaceae  | <i>Cephalotaxus</i> | <i>Cephalotaxus griffithii</i>  | GQ463522 |
| Gymnosperms    | Cephalotaxaceae  | <i>Cephalotaxus</i> | <i>Cephalotaxus griffithii</i>  | EF660669 |
| Gymnosperms    | Cephalotaxaceae  | <i>Cephalotaxus</i> | <i>Cephalotaxus lanceolata</i>  | GQ463510 |
| Gymnosperms    | Cephalotaxaceae  | <i>Cephalotaxus</i> | <i>Cephalotaxus lanceolata</i>  | EF660676 |
| Gymnosperms    | Cephalotaxaceae  | <i>Cephalotaxus</i> | <i>Cephalotaxus lanceolata</i>  | JN044247 |
| Gymnosperms    | Cephalotaxaceae  | <i>Cephalotaxus</i> | <i>Cephalotaxus lanceolata</i>  | JN044248 |
| Monocotyledons | Alismataceae     | <i>Echinodorus</i>  | <i>Echinodorus cordifolius</i>  | HM367302 |
| Monocotyledons | Alismataceae     | <i>Echinodorus</i>  | <i>Echinodorus cordifolius</i>  | HM367303 |
| Monocotyledons | Alismataceae     | <i>Echinodorus</i>  | <i>Echinodorus cordifolius</i>  | HM367311 |
| Monocotyledons | Alismataceae     | <i>Echinodorus</i>  | <i>Echinodorus cordifolius</i>  | HM367315 |
| Monocotyledons | Alismataceae     | <i>Echinodorus</i>  | <i>Echinodorus cordifolius</i>  | HM367317 |
| Monocotyledons | Alismataceae     | <i>Echinodorus</i>  | <i>Echinodorus cordifolius</i>  | HM367318 |
| Monocotyledons | Colchicaceae     | <i>Colchicum</i>    | <i>Colchicum speciosum</i>      | JF934161 |
| Monocotyledons | Colchicaceae     | <i>Colchicum</i>    | <i>Colchicum speciosum</i>      | JF934162 |
| Monocotyledons | Colchicaceae     | <i>Colchicum</i>    | <i>Colchicum speciosum</i>      | JF934163 |
| Monocotyledons | Juncaceae        | <i>Juncus</i>       | <i>Juncus effusus</i>           | HQ596739 |
| Monocotyledons | Juncaceae        | <i>Juncus</i>       | <i>Juncus effusus</i>           | GQ434955 |
| Monocotyledons | Juncaceae        | <i>Juncus</i>       | <i>Juncus effusus</i>           | GQ434956 |
| Monocotyledons | Alismataceae     | <i>Alisma</i>       | <i>Alisma plantago-aquatica</i> | GQ435456 |
| Monocotyledons | Alismataceae     | <i>Alisma</i>       | <i>Alisma plantago-aquatica</i> | JN043778 |
| Monocotyledons | Alismataceae     | <i>Alisma</i>       | <i>Alisma plantago-aquatica</i> | JN043779 |
| Monocotyledons | Alismataceae     | <i>Alisma</i>       | <i>Alisma plantago-aquatica</i> | JN043780 |
| Monocotyledons | Alismataceae     | <i>Alisma</i>       | <i>Alisma plantago-aquatica</i> | JN043781 |
| Monocotyledons | Alismataceae     | <i>Alisma</i>       | <i>Alisma plantago-aquatica</i> | JN043782 |
| Monocotyledons | Alismataceae     | <i>Alisma</i>       | <i>Alisma plantago-aquatica</i> | JN043783 |
| Monocotyledons | Alismataceae     | <i>Alisma</i>       | <i>Alisma plantago-aquatica</i> | JN043784 |
| Monocotyledons | Alismataceae     | <i>Alisma</i>       | <i>Alisma plantago-aquatica</i> | JN043785 |
| Monocotyledons | Alismataceae     | <i>Alisma</i>       | <i>Alisma plantago-aquatica</i> | JN043786 |
| Monocotyledons | Potamogetonaceae | <i>Potamogeton</i>  | <i>Potamogeton amplifolius</i>  | DQ786563 |
| Monocotyledons | Potamogetonaceae | <i>Potamogeton</i>  | <i>Potamogeton amplifolius</i>  | DQ786564 |
| Monocotyledons | Potamogetonaceae | <i>Potamogeton</i>  | <i>Potamogeton richardsonii</i> | DQ786549 |

|                |                  |                    |                                 |          |
|----------------|------------------|--------------------|---------------------------------|----------|
| Monocotyledons | Potamogetonaceae | <i>Potamogeton</i> | <i>Potamogeton richardsonii</i> | DQ786550 |
| Monocotyledons | Potamogetonaceae | <i>Potamogeton</i> | <i>Potamogeton richardsonii</i> | DQ786551 |
| Monocotyledons | Arecaceae        | <i>Sabal</i>       | <i>Sabal minor</i>              | GQ248388 |
| Monocotyledons | Arecaceae        | <i>Sabal</i>       | <i>Sabal minor</i>              | EF688519 |
| Monocotyledons | Asparagaceae     | <i>Polygonatum</i> | <i>Polygonatum humile</i>       | JN046415 |
| Monocotyledons | Asparagaceae     | <i>Polygonatum</i> | <i>Polygonatum humile</i>       | JN046416 |
| Monocotyledons | Asparagaceae     | <i>Polygonatum</i> | <i>Polygonatum humile</i>       | JN046417 |
| Monocotyledons | Asparagaceae     | <i>Polygonatum</i> | <i>Polygonatum humile</i>       | JN046418 |
| Monocotyledons | Asparagaceae     | <i>Maianthemum</i> | <i>Maianthemum racemosum</i>    | HQ596763 |
| Monocotyledons | Asparagaceae     | <i>Maianthemum</i> | <i>Maianthemum racemosum</i>    | EU850237 |
| Monocotyledons | Asparagaceae     | <i>Maianthemum</i> | <i>Maianthemum racemosum</i>    | EU850238 |
| Monocotyledons | Asparagaceae     | <i>Maianthemum</i> | <i>Maianthemum racemosum</i>    | JN045467 |
| Monocotyledons | Asparagaceae     | <i>Maianthemum</i> | <i>Maianthemum racemosum</i>    | JN045468 |
| Monocotyledons | Colchicaceae     | <i>Colchicum</i>   | <i>Colchicum autumnale</i>      | FR865109 |
| Monocotyledons | Colchicaceae     | <i>Colchicum</i>   | <i>Colchicum autumnale</i>      | FN675817 |
| Monocotyledons | Colchicaceae     | <i>Colchicum</i>   | <i>Colchicum autumnale</i>      | JF934068 |
| Monocotyledons | Colchicaceae     | <i>Colchicum</i>   | <i>Colchicum autumnale</i>      | JF934069 |
| Monocotyledons | Colchicaceae     | <i>Colchicum</i>   | <i>Colchicum autumnale</i>      | JF934070 |
| Monocotyledons | Bromeliaceae     | <i>Aechmea</i>     | <i>Aechmea allenii</i>          | EF110654 |
| Monocotyledons | Bromeliaceae     | <i>Aechmea</i>     | <i>Aechmea allenii</i>          | HQ913722 |
| Monocotyledons | Poaceae          | <i>Elymus</i>      | <i>Elymus repens</i>            | FJ395519 |
| Monocotyledons | Poaceae          | <i>Elymus</i>      | <i>Elymus repens</i>            | HQ596680 |
| Monocotyledons | Poaceae          | <i>Elymus</i>      | <i>Elymus repens</i>            | EU531722 |
| Monocotyledons | Poaceae          | <i>Stipa</i>       | <i>Stipa parviflora</i>         | EU204777 |
| Monocotyledons | Poaceae          | <i>Stipa</i>       | <i>Stipa parviflora</i>         | EU204778 |
| Monocotyledons | Poaceae          | <i>Elymus</i>      | <i>Elymus sibiricus</i>         | HQ221837 |
| Monocotyledons | Poaceae          | <i>Elymus</i>      | <i>Elymus sibiricus</i>         | HQ221842 |
| Monocotyledons | Alismataceae     | <i>Echinodorus</i> | <i>Echinodorus grandiflorus</i> | HM367294 |
| Monocotyledons | Alismataceae     | <i>Echinodorus</i> | <i>Echinodorus grandiflorus</i> | HM367297 |
| Monocotyledons | Alismataceae     | <i>Echinodorus</i> | <i>Echinodorus grandiflorus</i> | HM367309 |
| Monocotyledons | Cymodoceaceae    | <i>Halodule</i>    | <i>Halodule pinifolia</i>       | AB571183 |
| Monocotyledons | Cymodoceaceae    | <i>Halodule</i>    | <i>Halodule pinifolia</i>       | AB571184 |
| Monocotyledons | Cymodoceaceae    | <i>Halodule</i>    | <i>Halodule pinifolia</i>       | AB571185 |
| Monocotyledons | Cymodoceaceae    | <i>Halodule</i>    | <i>Halodule pinifolia</i>       | AB571186 |
| Monocotyledons | Cymodoceaceae    | <i>Halodule</i>    | <i>Halodule pinifolia</i>       | AB571187 |
| Monocotyledons | Cymodoceaceae    | <i>Halodule</i>    | <i>Halodule pinifolia</i>       | AB571188 |
| Monocotyledons | Cymodoceaceae    | <i>Halodule</i>    | <i>Halodule pinifolia</i>       | AB571189 |
| Monocotyledons | Cymodoceaceae    | <i>Halodule</i>    | <i>Halodule pinifolia</i>       | AB571190 |
| Monocotyledons | Hydrocharitaceae | <i>Najas</i>       | <i>Najas marina</i>             | HQ687180 |
| Monocotyledons | Hydrocharitaceae | <i>Najas</i>       | <i>Najas marina</i>             | HQ687181 |
| Monocotyledons | Hydrocharitaceae | <i>Najas</i>       | <i>Najas marina</i>             | HQ687182 |
| Monocotyledons | Hydrocharitaceae | <i>Najas</i>       | <i>Najas marina</i>             | HQ687183 |
| Monocotyledons | Potamogetonaceae | <i>Potamogeton</i> | <i>Potamogeton crispus</i>      | DQ786527 |
| Monocotyledons | Potamogetonaceae | <i>Potamogeton</i> | <i>Potamogeton crispus</i>      | DQ786528 |
| Monocotyledons | Potamogetonaceae | <i>Potamogeton</i> | <i>Potamogeton gramineus</i>    | DQ786534 |
| Monocotyledons | Potamogetonaceae | <i>Potamogeton</i> | <i>Potamogeton gramineus</i>    | EF174574 |
| Monocotyledons | Potamogetonaceae | <i>Potamogeton</i> | <i>Potamogeton gramineus</i>    | FN668445 |
| Monocotyledons | Poaceae          | <i>Zizania</i>     | <i>Zizania latifolia</i>        | GU177392 |
| Monocotyledons | Poaceae          | <i>Zizania</i>     | <i>Zizania latifolia</i>        | GU177393 |
| Monocotyledons | Hydrocharitaceae | <i>Najas</i>       | <i>Najas minor</i>              | HQ687184 |
| Monocotyledons | Hydrocharitaceae | <i>Najas</i>       | <i>Najas minor</i>              | HQ687185 |
| Monocotyledons | Hydrocharitaceae | <i>Najas</i>       | <i>Najas minor</i>              | HQ687186 |
| Monocotyledons | Hydrocharitaceae | <i>Najas</i>       | <i>Najas minor</i>              | HQ687187 |

|                |                  |                    |                                 |          |
|----------------|------------------|--------------------|---------------------------------|----------|
| Monocotyledons | Poaceae          | <i>Agrostis</i>    | <i>Agrostis stolonifera</i>     | HQ596586 |
| Monocotyledons | Poaceae          | <i>Agrostis</i>    | <i>Agrostis stolonifera</i>     | HQ596587 |
| Monocotyledons | Cyperaceae       | <i>Carex</i>       | <i>Carex laxiflora</i>          | HQ596627 |
| Monocotyledons | Cyperaceae       | <i>Carex</i>       | <i>Carex laxiflora</i>          | HQ596628 |
| Monocotyledons | Poaceae          | <i>Zizania</i>     | <i>Zizania aquatica</i>         | GU177368 |
| Monocotyledons | Poaceae          | <i>Zizania</i>     | <i>Zizania aquatica</i>         | GU177376 |
| Monocotyledons | Poaceae          | <i>Zizania</i>     | <i>Zizania aquatica</i>         | GU177377 |
| Monocotyledons | Poaceae          | <i>Zizania</i>     | <i>Zizania aquatica</i>         | GU177378 |
| Monocotyledons | Poaceae          | <i>Zizania</i>     | <i>Zizania aquatica</i>         | GU177379 |
| Monocotyledons | Poaceae          | <i>Zizania</i>     | <i>Zizania aquatica</i>         | GU177380 |
| Monocotyledons | Poaceae          | <i>Zizania</i>     | <i>Zizania aquatica</i>         | GU177381 |
| Monocotyledons | Poaceae          | <i>Zizania</i>     | <i>Zizania aquatica</i>         | GU177382 |
| Monocotyledons | Poaceae          | <i>Zizania</i>     | <i>Zizania aquatica</i>         | GU177386 |
| Monocotyledons | Poaceae          | <i>Zizania</i>     | <i>Zizania aquatica</i>         | GU177387 |
| Monocotyledons | Poaceae          | <i>Zizania</i>     | <i>Zizania aquatica</i>         | GU177388 |
| Monocotyledons | Poaceae          | <i>Zizania</i>     | <i>Zizania aquatica</i>         | GU177390 |
| Monocotyledons | Orchidaceae      | <i>Cymbidium</i>   | <i>Cymbidium ensifolium</i>     | FJ527765 |
| Monocotyledons | Orchidaceae      | <i>Cymbidium</i>   | <i>Cymbidium ensifolium</i>     | FJ527766 |
| Monocotyledons | Asparagaceae     | <i>Polygonatum</i> | <i>Polygonatum odoratum</i>     | GQ434924 |
| Monocotyledons | Asparagaceae     | <i>Polygonatum</i> | <i>Polygonatum odoratum</i>     | GQ434925 |
| Monocotyledons | Potamogetonaceae | <i>Potamogeton</i> | <i>Potamogeton nodosus</i>      | DQ786541 |
| Monocotyledons | Potamogetonaceae | <i>Potamogeton</i> | <i>Potamogeton nodosus</i>      | DQ786565 |
| Monocotyledons | Asparagaceae     | <i>Polygonatum</i> | <i>Polygonatum cirrhifolium</i> | EU850212 |
| Monocotyledons | Asparagaceae     | <i>Polygonatum</i> | <i>Polygonatum cirrhifolium</i> | JN046400 |
| Monocotyledons | Asparagaceae     | <i>Polygonatum</i> | <i>Polygonatum cirrhifolium</i> | JN046401 |
| Monocotyledons | Asparagaceae     | <i>Polygonatum</i> | <i>Polygonatum cirrhifolium</i> | JN046402 |
| Monocotyledons | Asparagaceae     | <i>Polygonatum</i> | <i>Polygonatum cirrhifolium</i> | JN046403 |
| Monocotyledons | Asparagaceae     | <i>Polygonatum</i> | <i>Polygonatum cirrhifolium</i> | JN046404 |
| Monocotyledons | Asparagaceae     | <i>Polygonatum</i> | <i>Polygonatum cirrhifolium</i> | JN046405 |
| Monocotyledons | Asparagaceae     | <i>Polygonatum</i> | <i>Polygonatum cirrhifolium</i> | JN046406 |
| Monocotyledons | Asparagaceae     | <i>Polygonatum</i> | <i>Polygonatum cirrhifolium</i> | JN046407 |
| Monocotyledons | Asparagaceae     | <i>Polygonatum</i> | <i>Polygonatum cirrhifolium</i> | JN046408 |
| Monocotyledons | Asparagaceae     | <i>Polygonatum</i> | <i>Polygonatum cirrhifolium</i> | JN046409 |
| Monocotyledons | Asparagaceae     | <i>Polygonatum</i> | <i>Polygonatum cirrhifolium</i> | JN046410 |
| Monocotyledons | Asparagaceae     | <i>Polygonatum</i> | <i>Polygonatum cirrhifolium</i> | JN046411 |
| Monocotyledons | Asparagaceae     | <i>Polygonatum</i> | <i>Polygonatum cirrhifolium</i> | JN046412 |
| Monocotyledons | Asparagaceae     | <i>Maianthemum</i> | <i>Maianthemum japonicum</i>    | GQ434900 |
| Monocotyledons | Asparagaceae     | <i>Maianthemum</i> | <i>Maianthemum japonicum</i>    | EU850231 |
| Monocotyledons | Asparagaceae     | <i>Maianthemum</i> | <i>Maianthemum japonicum</i>    | EU850232 |
| Monocotyledons | Asparagaceae     | <i>Maianthemum</i> | <i>Maianthemum japonicum</i>    | EU850240 |
| Monocotyledons | Asparagaceae     | <i>Maianthemum</i> | <i>Maianthemum japonicum</i>    | JN045454 |
| Monocotyledons | Asparagaceae     | <i>Maianthemum</i> | <i>Maianthemum japonicum</i>    | JN045455 |
| Monocotyledons | Asparagaceae     | <i>Maianthemum</i> | <i>Maianthemum japonicum</i>    | JN045456 |
| Monocotyledons | Asparagaceae     | <i>Maianthemum</i> | <i>Maianthemum japonicum</i>    | JN045457 |
| Monocotyledons | Asparagaceae     | <i>Maianthemum</i> | <i>Maianthemum japonicum</i>    | JN045458 |
| Monocotyledons | Asparagaceae     | <i>Maianthemum</i> | <i>Maianthemum japonicum</i>    | JN045459 |
| Monocotyledons | Poaceae          | <i>Zizania</i>     | <i>Zizania palustris</i>        | GU177369 |
| Monocotyledons | Poaceae          | <i>Zizania</i>     | <i>Zizania palustris</i>        | GU177370 |
| Monocotyledons | Poaceae          | <i>Zizania</i>     | <i>Zizania palustris</i>        | GU177371 |
| Monocotyledons | Poaceae          | <i>Zizania</i>     | <i>Zizania palustris</i>        | GU177372 |
| Monocotyledons | Poaceae          | <i>Zizania</i>     | <i>Zizania palustris</i>        | GU177373 |
| Monocotyledons | Poaceae          | <i>Zizania</i>     | <i>Zizania palustris</i>        | GU177374 |
| Monocotyledons | Poaceae          | <i>Zizania</i>     | <i>Zizania palustris</i>        | GU177375 |

|                |               |                     |                                  |          |
|----------------|---------------|---------------------|----------------------------------|----------|
| Monocotyledons | Poaceae       | <i>Zizania</i>      | <i>Zizania palustris</i>         | GU177383 |
| Monocotyledons | Poaceae       | <i>Zizania</i>      | <i>Zizania palustris</i>         | GU177384 |
| Monocotyledons | Poaceae       | <i>Zizania</i>      | <i>Zizania palustris</i>         | GU177385 |
| Monocotyledons | Poaceae       | <i>Zizania</i>      | <i>Zizania palustris</i>         | GU177389 |
| Monocotyledons | Bromeliaceae  | <i>Aechmea</i>      | <i>Aechmea distichantha</i>      | JN204613 |
| Monocotyledons | Bromeliaceae  | <i>Aechmea</i>      | <i>Aechmea distichantha</i>      | JN204614 |
| Monocotyledons | Zingiberaceae | <i>Gagnepainia</i>  | <i>Gagnepainia godefroyi</i>     | GQ386049 |
| Monocotyledons | Zingiberaceae | <i>Gagnepainia</i>  | <i>Gagnepainia godefroyi</i>     | GQ386050 |
| Monocotyledons | Arecaceae     | <i>Arenga</i>       | <i>Arenga hookeriana</i>         | JF345017 |
| Monocotyledons | Arecaceae     | <i>Arenga</i>       | <i>Arenga hookeriana</i>         | JF345025 |
| Monocotyledons | Arecaceae     | <i>Arenga</i>       | <i>Arenga hookeriana</i>         | JF345026 |
| Monocotyledons | Arecaceae     | <i>Arenga</i>       | <i>Arenga hookeriana</i>         | JF345027 |
| Monocotyledons | Arecaceae     | <i>Arenga</i>       | <i>Arenga hookeriana</i>         | JF345028 |
| Monocotyledons | Arecaceae     | <i>Wallichia</i>    | <i>Wallichia disticha</i>        | JF345073 |
| Monocotyledons | Arecaceae     | <i>Wallichia</i>    | <i>Wallichia disticha</i>        | JF345074 |
| Monocotyledons | Orchidaceae   | <i>Cischweinfia</i> | <i>Cischweinfia dasyandra</i>    | FJ564133 |
| Monocotyledons | Orchidaceae   | <i>Cischweinfia</i> | <i>Cischweinfia dasyandra</i>    | FJ564646 |
| Monocotyledons | Orchidaceae   | <i>Cuitlauzina</i>  | <i>Cuitlauzina pendula</i>       | FJ564076 |
| Monocotyledons | Orchidaceae   | <i>Cuitlauzina</i>  | <i>Cuitlauzina pendula</i>       | FJ564664 |
| Monocotyledons | Orchidaceae   | <i>Fernandezia</i>  | <i>Fernandezia ionanthera</i>    | FJ564101 |
| Monocotyledons | Orchidaceae   | <i>Fernandezia</i>  | <i>Fernandezia ionanthera</i>    | FJ564527 |
| Monocotyledons | Orchidaceae   | <i>Lockhartia</i>   | <i>Lockhartia oerstedii</i>      | EU213746 |
| Monocotyledons | Orchidaceae   | <i>Lockhartia</i>   | <i>Lockhartia oerstedii</i>      | FJ563978 |
| Monocotyledons | Arecaceae     | <i>Arenga</i>       | <i>Arenga caudata</i>            | JF345007 |
| Monocotyledons | Arecaceae     | <i>Arenga</i>       | <i>Arenga caudata</i>            | JF345008 |
| Monocotyledons | Arecaceae     | <i>Arenga</i>       | <i>Arenga caudata</i>            | JF345009 |
| Monocotyledons | Arecaceae     | <i>Arenga</i>       | <i>Arenga caudata</i>            | JF345010 |
| Monocotyledons | Arecaceae     | <i>Arenga</i>       | <i>Arenga caudata</i>            | JF345011 |
| Monocotyledons | Arecaceae     | <i>Arenga</i>       | <i>Arenga caudata</i>            | JF345012 |
| Monocotyledons | Arecaceae     | <i>Arenga</i>       | <i>Arenga caudata</i>            | JF345013 |
| Monocotyledons | Arecaceae     | <i>Arenga</i>       | <i>Arenga caudata</i>            | JF345014 |
| Monocotyledons | Arecaceae     | <i>Arenga</i>       | <i>Arenga caudata</i>            | JF345015 |
| Monocotyledons | Arecaceae     | <i>Arenga</i>       | <i>Arenga caudata</i>            | JF345016 |
| Monocotyledons | Arecaceae     | <i>Arenga</i>       | <i>Arenga undulatifolia</i>      | JF345039 |
| Monocotyledons | Arecaceae     | <i>Arenga</i>       | <i>Arenga undulatifolia</i>      | JF345040 |
| Monocotyledons | Orchidaceae   | <i>Prosthechea</i>  | <i>Prosthechea cochleata</i>     | EU213757 |
| Monocotyledons | Orchidaceae   | <i>Prosthechea</i>  | <i>Prosthechea cochleata</i>     | EU213758 |
| Monocotyledons | Arecaceae     | <i>Hyphaene</i>     | <i>Hyphaene coriacea</i>         | EU213775 |
| Monocotyledons | Arecaceae     | <i>Hyphaene</i>     | <i>Hyphaene coriacea</i>         | EU213776 |
| Monocotyledons | Arecaceae     | <i>Hyphaene</i>     | <i>Hyphaene coriacea</i>         | EU213777 |
| Monocotyledons | Arecaceae     | <i>Hyphaene</i>     | <i>Hyphaene coriacea</i>         | EU213778 |
| Monocotyledons | Orchidaceae   | <i>Rhynchosele</i>  | <i>Rhynchosele beloglossa</i>    | EU213707 |
| Monocotyledons | Orchidaceae   | <i>Rhynchosele</i>  | <i>Rhynchosele beloglossa</i>    | FJ564093 |
| Monocotyledons | Orchidaceae   | <i>Rhynchosele</i>  | <i>Rhynchosele beloglossa</i>    | FJ564134 |
| Monocotyledons | Orchidaceae   | <i>Comparettia</i>  | <i>Comparettia macroplectron</i> | FJ564052 |
| Monocotyledons | Orchidaceae   | <i>Comparettia</i>  | <i>Comparettia macroplectron</i> | FJ564656 |
| Monocotyledons | Orchidaceae   | <i>Cyrtochilum</i>  | <i>Cyrtochilum cimiciferum</i>   | FJ563997 |
| Monocotyledons | Orchidaceae   | <i>Cyrtochilum</i>  | <i>Cyrtochilum cimiciferum</i>   | FJ564239 |
| Monocotyledons | Orchidaceae   | <i>Cyrtochilum</i>  | <i>Cyrtochilum cimiciferum</i>   | FJ564518 |
| Monocotyledons | Orchidaceae   | <i>Cyrtochilum</i>  | <i>Cyrtochilum edwardii</i>      | FJ564091 |
| Monocotyledons | Orchidaceae   | <i>Cyrtochilum</i>  | <i>Cyrtochilum edwardii</i>      | FJ564669 |
| Monocotyledons | Orchidaceae   | <i>Erycina</i>      | <i>Erycina crista-galli</i>      | EU213751 |
| Monocotyledons | Orchidaceae   | <i>Erycina</i>      | <i>Erycina crista-galli</i>      | FJ564144 |



|                |             |                     |                                 |          |
|----------------|-------------|---------------------|---------------------------------|----------|
| Monocotyledons | Orchidaceae | <i>Erycina</i>      | <i>Erycina echinata</i>         | FJ564063 |
| Monocotyledons | Orchidaceae | <i>Erycina</i>      | <i>Erycina echinata</i>         | FJ564434 |
| Monocotyledons | Orchidaceae | <i>Erycina</i>      | <i>Erycina hyalinobulbon</i>    | FJ564026 |
| Monocotyledons | Orchidaceae | <i>Erycina</i>      | <i>Erycina hyalinobulbon</i>    | FJ564435 |
| Monocotyledons | Orchidaceae | <i>Erycina</i>      | <i>Erycina pumilio</i>          | EU213737 |
| Monocotyledons | Orchidaceae | <i>Erycina</i>      | <i>Erycina pumilio</i>          | EU213738 |
| Monocotyledons | Orchidaceae | <i>Erycina</i>      | <i>Erycina pumilio</i>          | FJ564149 |
| Monocotyledons | Orchidaceae | <i>Erycina</i>      | <i>Erycina pumilio</i>          | FJ564556 |
| Monocotyledons | Orchidaceae | <i>Erycina</i>      | <i>Erycina pusilla</i>          | FJ564021 |
| Monocotyledons | Orchidaceae | <i>Erycina</i>      | <i>Erycina pusilla</i>          | FJ564542 |
| Monocotyledons | Orchidaceae | <i>Ionopsis</i>     | <i>Ionopsis minutiflora</i>     | FJ564136 |
| Monocotyledons | Orchidaceae | <i>Ionopsis</i>     | <i>Ionopsis minutiflora</i>     | FJ564462 |
| Monocotyledons | Orchidaceae | <i>Ionopsis</i>     | <i>Ionopsis minutiflora</i>     | FJ564565 |
| Monocotyledons | Orchidaceae | <i>Ionopsis</i>     | <i>Ionopsis satyrioides</i>     | FJ564135 |
| Monocotyledons | Orchidaceae | <i>Ionopsis</i>     | <i>Ionopsis satyrioides</i>     | FJ564266 |
| Monocotyledons | Orchidaceae | <i>Ionopsis</i>     | <i>Ionopsis utricularioides</i> | FJ564022 |
| Monocotyledons | Orchidaceae | <i>Ionopsis</i>     | <i>Ionopsis utricularioides</i> | FJ564559 |
| Monocotyledons | Orchidaceae | <i>Gomesa</i>       | <i>Gomesa flexuosa</i>          | FJ564049 |
| Monocotyledons | Orchidaceae | <i>Gomesa</i>       | <i>Gomesa flexuosa</i>          | FJ564546 |
| Monocotyledons | Orchidaceae | <i>Gomesa</i>       | <i>Gomesa flexuosa</i>          | FJ564662 |
| Monocotyledons | Orchidaceae | <i>Rhyncho스테레</i>   | <i>Rhyncho스테레 bictoniensis</i>  | GQ248385 |
| Monocotyledons | Orchidaceae | <i>Rhyncho스테레</i>   | <i>Rhyncho스테레 bictoniensis</i>  | EU213764 |
| Monocotyledons | Orchidaceae | <i>Rhyncho스테레</i>   | <i>Rhyncho스테레 bictoniensis</i>  | FJ564004 |
| Monocotyledons | Orchidaceae | <i>Tolumnia</i>     | <i>Tolumnia calochila</i>       | FJ564087 |
| Monocotyledons | Orchidaceae | <i>Tolumnia</i>     | <i>Tolumnia calochila</i>       | FJ564232 |
| Monocotyledons | Orchidaceae | <i>Trichopilia</i>  | <i>Trichopilia subulata</i>     | FJ564073 |
| Monocotyledons | Orchidaceae | <i>Trichopilia</i>  | <i>Trichopilia subulata</i>     | FJ564550 |
| Monocotyledons | Orchidaceae | <i>Cyrtochilum</i>  | <i>Cyrtochilum angustatum</i>   | FJ564068 |
| Monocotyledons | Orchidaceae | <i>Cyrtochilum</i>  | <i>Cyrtochilum angustatum</i>   | FJ564260 |
| Monocotyledons | Orchidaceae | <i>Cyrtochilum</i>  | <i>Cyrtochilum pardinum</i>     | FJ564092 |
| Monocotyledons | Orchidaceae | <i>Cyrtochilum</i>  | <i>Cyrtochilum pardinum</i>     | FJ564170 |
| Monocotyledons | Orchidaceae | <i>Cyrtochilum</i>  | <i>Cyrtochilum ramosissimum</i> | FJ564056 |
| Monocotyledons | Orchidaceae | <i>Cyrtochilum</i>  | <i>Cyrtochilum ramosissimum</i> | FJ564483 |
| Monocotyledons | Orchidaceae | <i>Cyrtochilum</i>  | <i>Cyrtochilum tricostatum</i>  | FJ564086 |
| Monocotyledons | Orchidaceae | <i>Cyrtochilum</i>  | <i>Cyrtochilum tricostatum</i>  | FJ564102 |
| Monocotyledons | Orchidaceae | <i>Cyrtochilum</i>  | <i>Cyrtochilum tricostatum</i>  | FJ564151 |
| Monocotyledons | Orchidaceae | <i>Cyrtochilum</i>  | <i>Cyrtochilum tricostatum</i>  | FJ564243 |
| Monocotyledons | Orchidaceae | <i>Cyrtochilum</i>  | <i>Cyrtochilum tricostatum</i>  | FJ564247 |
| Monocotyledons | Orchidaceae | <i>Cyrtochilum</i>  | <i>Cyrtochilum tricostatum</i>  | FJ564486 |
| Monocotyledons | Orchidaceae | <i>Miltoniopsis</i> | <i>Miltoniopsis vexillaria</i>  | FJ564060 |
| Monocotyledons | Orchidaceae | <i>Miltoniopsis</i> | <i>Miltoniopsis vexillaria</i>  | FJ564341 |
| Monocotyledons | Araceae     | <i>Wolffia</i>      | <i>Wolffia australiana</i>      | GU454554 |
| Monocotyledons | Araceae     | <i>Wolffia</i>      | <i>Wolffia australiana</i>      | GU454555 |
| Monocotyledons | Araceae     | <i>Wolffia</i>      | <i>Wolffia brasiliensis</i>     | GU454557 |
| Monocotyledons | Araceae     | <i>Wolffia</i>      | <i>Wolffia brasiliensis</i>     | GU454558 |
| Monocotyledons | Araceae     | <i>Wolffia</i>      | <i>Wolffia brasiliensis</i>     | GU454559 |
| Monocotyledons | Araceae     | <i>Wolffia</i>      | <i>Wolffia columbiana</i>       | GU454560 |
| Monocotyledons | Araceae     | <i>Wolffia</i>      | <i>Wolffia columbiana</i>       | GU454561 |
| Monocotyledons | Araceae     | <i>Wolffia</i>      | <i>Wolffia columbiana</i>       | GU454562 |
| Monocotyledons | Araceae     | <i>Wolffia</i>      | <i>Wolffia columbiana</i>       | GU454563 |
| Monocotyledons | Araceae     | <i>Wolffia</i>      | <i>Wolffia columbiana</i>       | GU454564 |
| Monocotyledons | Araceae     | <i>Wolffia</i>      | <i>Wolffia columbiana</i>       | HQ596901 |
| Monocotyledons | Araceae     | <i>Wolffia</i>      | <i>Wolffia globosa</i>          | GU454567 |

|                |                  |                     |                                 |          |
|----------------|------------------|---------------------|---------------------------------|----------|
| Monocotyledons | Araceae          | <i>Wolffia</i>      | <i>Wolffia globosa</i>          | GU454568 |
| Monocotyledons | Araceae          | <i>Wolffia</i>      | <i>Wolffia globosa</i>          | GU454569 |
| Monocotyledons | Araceae          | <i>Wolffia</i>      | <i>Wolffia globosa</i>          | GU454570 |
| Monocotyledons | Araceae          | <i>Wolffia</i>      | <i>Wolffia globosa</i>          | GU454571 |
| Monocotyledons | Araceae          | <i>Wolffia</i>      | <i>Wolffia globosa</i>          | GU454572 |
| Monocotyledons | Araceae          | <i>Wolffia</i>      | <i>Wolffia globosa</i>          | GU454573 |
| Monocotyledons | Araceae          | <i>Wolffiella</i>   | <i>Wolffiella gladiata</i>      | GU454531 |
| Monocotyledons | Araceae          | <i>Wolffiella</i>   | <i>Wolffiella gladiata</i>      | GU454532 |
| Monocotyledons | Araceae          | <i>Wolffiella</i>   | <i>Wolffiella gladiata</i>      | GU454533 |
| Monocotyledons | Araceae          | <i>Wolffiella</i>   | <i>Wolffiella gladiata</i>      | GU454534 |
| Monocotyledons | Araceae          | <i>Wolffiella</i>   | <i>Wolffiella gladiata</i>      | GU454535 |
| Monocotyledons | Araceae          | <i>Wolffiella</i>   | <i>Wolffiella lingulata</i>     | GU454537 |
| Monocotyledons | Araceae          | <i>Wolffiella</i>   | <i>Wolffiella lingulata</i>     | GU454538 |
| Monocotyledons | Araceae          | <i>Wolffiella</i>   | <i>Wolffiella lingulata</i>     | GU454539 |
| Monocotyledons | Araceae          | <i>Wolffiella</i>   | <i>Wolffiella lingulata</i>     | GU454540 |
| Monocotyledons | Araceae          | <i>Wolffiella</i>   | <i>Wolffiella lingulata</i>     | GU454541 |
| Monocotyledons | Araceae          | <i>Wolffiella</i>   | <i>Wolffiella neotropica</i>    | GU454542 |
| Monocotyledons | Araceae          | <i>Wolffiella</i>   | <i>Wolffiella neotropica</i>    | GU454543 |
| Monocotyledons | Araceae          | <i>Wolffiella</i>   | <i>Wolffiella neotropica</i>    | GU454544 |
| Monocotyledons | Araceae          | <i>Wolffiella</i>   | <i>Wolffiella oblonga</i>       | GU454545 |
| Monocotyledons | Araceae          | <i>Wolffiella</i>   | <i>Wolffiella oblonga</i>       | GU454546 |
| Monocotyledons | Araceae          | <i>Wolffiella</i>   | <i>Wolffiella oblonga</i>       | GU454547 |
| Monocotyledons | Araceae          | <i>Wolffiella</i>   | <i>Wolffiella oblonga</i>       | GU454548 |
| Monocotyledons | Araceae          | <i>Wolffiella</i>   | <i>Wolffiella oblonga</i>       | GU454549 |
| Monocotyledons | Araceae          | <i>Wolffiella</i>   | <i>Wolffiella rotunda</i>       | GU454550 |
| Monocotyledons | Araceae          | <i>Wolffiella</i>   | <i>Wolffiella rotunda</i>       | GU454551 |
| Monocotyledons | Poaceae          | <i>Paspalum</i>     | <i>Paspalum quadrifarium</i>    | AY941123 |
| Monocotyledons | Poaceae          | <i>Paspalum</i>     | <i>Paspalum quadrifarium</i>    | AY941127 |
| Monocotyledons | Orchidaceae      | <i>Caucaea</i>      | <i>Caucaea cucullata</i>        | FJ564196 |
| Monocotyledons | Orchidaceae      | <i>Caucaea</i>      | <i>Caucaea cucullata</i>        | FJ564530 |
| Monocotyledons | Orchidaceae      | <i>Caucaea</i>      | <i>Caucaea phalaenopsis</i>     | FJ564006 |
| Monocotyledons | Orchidaceae      | <i>Caucaea</i>      | <i>Caucaea phalaenopsis</i>     | FJ564529 |
| Monocotyledons | Orchidaceae      | <i>Caucaea</i>      | <i>Caucaea radiata</i>          | FJ564281 |
| Monocotyledons | Orchidaceae      | <i>Caucaea</i>      | <i>Caucaea radiata</i>          | FJ564582 |
| Monocotyledons | Orchidaceae      | <i>Cyrtochilum</i>  | <i>Cyrtochilum meirax</i>       | FJ564444 |
| Monocotyledons | Orchidaceae      | <i>Cyrtochilum</i>  | <i>Cyrtochilum meirax</i>       | FJ564608 |
| Monocotyledons | Orchidaceae      | <i>Miltoniopsis</i> | <i>Miltoniopsis bismarkii</i>   | FJ564469 |
| Monocotyledons | Orchidaceae      | <i>Miltoniopsis</i> | <i>Miltoniopsis bismarkii</i>   | FJ564619 |
| Monocotyledons | Potamogetonaceae | <i>Potamogeton</i>  | <i>Potamogeton lucens</i>       | DQ786538 |
| Monocotyledons | Potamogetonaceae | <i>Potamogeton</i>  | <i>Potamogeton lucens</i>       | EF174573 |
| Monocotyledons | Potamogetonaceae | <i>Potamogeton</i>  | <i>Potamogeton natans</i>       | DQ786540 |
| Monocotyledons | Potamogetonaceae | <i>Potamogeton</i>  | <i>Potamogeton natans</i>       | HQ596798 |
| Monocotyledons | Asparagaceae     | <i>Maianthemum</i>  | <i>Maianthemum bifolium</i>     | EU850234 |
| Monocotyledons | Asparagaceae     | <i>Maianthemum</i>  | <i>Maianthemum bifolium</i>     | EU850235 |
| Monocotyledons | Asparagaceae     | <i>Maianthemum</i>  | <i>Maianthemum bifolium</i>     | JN045441 |
| Monocotyledons | Asparagaceae     | <i>Maianthemum</i>  | <i>Maianthemum bifolium</i>     | JN045442 |
| Monocotyledons | Asparagaceae     | <i>Maianthemum</i>  | <i>Maianthemum bifolium</i>     | JN045443 |
| Monocotyledons | Zingiberaceae    | <i>Gagnepainia</i>  | <i>Gagnepainia thoreliana</i>   | GQ386051 |
| Monocotyledons | Zingiberaceae    | <i>Gagnepainia</i>  | <i>Gagnepainia thoreliana</i>   | GQ386052 |
| Monocotyledons | Zingiberaceae    | <i>Gagnepainia</i>  | <i>Gagnepainia thoreliana</i>   | GQ386053 |
| Monocotyledons | Zingiberaceae    | <i>Gagnepainia</i>  | <i>Gagnepainia thoreliana</i>   | GQ386054 |
| Monocotyledons | Alismataceae     | <i>Echinodorus</i>  | <i>Echinodorus uruguayensis</i> | HM367293 |
| Monocotyledons | Alismataceae     | <i>Echinodorus</i>  | <i>Echinodorus uruguayensis</i> | HM367295 |

|                |                  |                      |                                    |          |
|----------------|------------------|----------------------|------------------------------------|----------|
| Monocotyledons | Alismataceae     | <i>Echinodorus</i>   | <i>Echinodorus uruguayensis</i>    | HM367316 |
| Monocotyledons | Potamogetonaceae | <i>Potamogeton</i>   | <i>Potamogeton diversifolius</i>   | DQ786529 |
| Monocotyledons | Potamogetonaceae | <i>Potamogeton</i>   | <i>Potamogeton diversifolius</i>   | DQ786530 |
| Monocotyledons | Colchicaceae     | <i>Colchicum</i>     | <i>Colchicum lusitanum</i>         | DQ088320 |
| Monocotyledons | Colchicaceae     | <i>Colchicum</i>     | <i>Colchicum lusitanum</i>         | JF934123 |
| Monocotyledons | Colchicaceae     | <i>Colchicum</i>     | <i>Colchicum lusitanum</i>         | JF934124 |
| Monocotyledons | Colchicaceae     | <i>Colchicum</i>     | <i>Colchicum montanum</i>          | DQ088324 |
| Monocotyledons | Colchicaceae     | <i>Colchicum</i>     | <i>Colchicum montanum</i>          | JF934134 |
| Monocotyledons | Colchicaceae     | <i>Colchicum</i>     | <i>Colchicum doerfleri</i>         | JF934095 |
| Monocotyledons | Colchicaceae     | <i>Colchicum</i>     | <i>Colchicum doerfleri</i>         | JF934110 |
| Monocotyledons | Colchicaceae     | <i>Colchicum</i>     | <i>Colchicum luteum</i>            | EU237059 |
| Monocotyledons | Colchicaceae     | <i>Colchicum</i>     | <i>Colchicum luteum</i>            | JF934125 |
| Monocotyledons | Colchicaceae     | <i>Colchicum</i>     | <i>Colchicum macrophyllum</i>      | JF934127 |
| Monocotyledons | Colchicaceae     | <i>Colchicum</i>     | <i>Colchicum macrophyllum</i>      | JF934128 |
| Monocotyledons | Poaceae          | <i>Dendrocalamus</i> | <i>Dendrocalamus strictus</i>      | GU391004 |
| Monocotyledons | Poaceae          | <i>Dendrocalamus</i> | <i>Dendrocalamus strictus</i>      | GU063120 |
| Monocotyledons | Potamogetonaceae | <i>Potamogeton</i>   | <i>Potamogeton maackianus</i>      | JN046453 |
| Monocotyledons | Potamogetonaceae | <i>Potamogeton</i>   | <i>Potamogeton maackianus</i>      | JN046454 |
| Monocotyledons | Potamogetonaceae | <i>Potamogeton</i>   | <i>Potamogeton maackianus</i>      | JN046455 |
| Monocotyledons | Potamogetonaceae | <i>Potamogeton</i>   | <i>Potamogeton maackianus</i>      | JN046456 |
| Monocotyledons | Potamogetonaceae | <i>Potamogeton</i>   | <i>Potamogeton maackianus</i>      | JN046457 |
| Monocotyledons | Orchidaceae      | <i>Prosthechea</i>   | <i>Prosthechea fragrans</i>        | EU213759 |
| Monocotyledons | Orchidaceae      | <i>Prosthechea</i>   | <i>Prosthechea fragrans</i>        | EU213760 |
| Monocotyledons | Orchidaceae      | <i>Cyrtochilum</i>   | <i>Cyrtochilum serratum</i>        | FJ564014 |
| Monocotyledons | Orchidaceae      | <i>Cyrtochilum</i>   | <i>Cyrtochilum serratum</i>        | FJ564123 |
| Monocotyledons | Asparagaceae     | <i>Polygonatum</i>   | <i>Polygonatum acuminatifolium</i> | JN046398 |
| Monocotyledons | Asparagaceae     | <i>Polygonatum</i>   | <i>Polygonatum acuminatifolium</i> | JN046399 |
| Monocotyledons | Asparagaceae     | <i>Polygonatum</i>   | <i>Polygonatum sibiricum</i>       | GQ434879 |
| Monocotyledons | Asparagaceae     | <i>Polygonatum</i>   | <i>Polygonatum sibiricum</i>       | GQ434880 |
| Monocotyledons | Asparagaceae     | <i>Polygonatum</i>   | <i>Polygonatum sibiricum</i>       | EU850210 |
| Monocotyledons | Asparagaceae     | <i>Polygonatum</i>   | <i>Polygonatum verticillatum</i>   | JN046419 |
| Monocotyledons | Asparagaceae     | <i>Polygonatum</i>   | <i>Polygonatum verticillatum</i>   | JN046420 |
| Monocotyledons | Asparagaceae     | <i>Polygonatum</i>   | <i>Polygonatum verticillatum</i>   | JN046421 |
| Monocotyledons | Asparagaceae     | <i>Polygonatum</i>   | <i>Polygonatum verticillatum</i>   | JN046422 |
| Monocotyledons | Asparagaceae     | <i>Maianthemum</i>   | <i>Maianthemum atropurpureum</i>   | EU850218 |
| Monocotyledons | Asparagaceae     | <i>Maianthemum</i>   | <i>Maianthemum atropurpureum</i>   | EU850219 |
| Monocotyledons | Asparagaceae     | <i>Maianthemum</i>   | <i>Maianthemum atropurpureum</i>   | EU850223 |
| Monocotyledons | Asparagaceae     | <i>Maianthemum</i>   | <i>Maianthemum atropurpureum</i>   | JN045433 |
| Monocotyledons | Asparagaceae     | <i>Maianthemum</i>   | <i>Maianthemum atropurpureum</i>   | JN045434 |
| Monocotyledons | Asparagaceae     | <i>Maianthemum</i>   | <i>Maianthemum atropurpureum</i>   | JN045435 |
| Monocotyledons | Asparagaceae     | <i>Maianthemum</i>   | <i>Maianthemum atropurpureum</i>   | JN045436 |
| Monocotyledons | Asparagaceae     | <i>Maianthemum</i>   | <i>Maianthemum atropurpureum</i>   | JN045437 |
| Monocotyledons | Asparagaceae     | <i>Maianthemum</i>   | <i>Maianthemum atropurpureum</i>   | JN045438 |
| Monocotyledons | Asparagaceae     | <i>Maianthemum</i>   | <i>Maianthemum atropurpureum</i>   | JN045439 |
| Monocotyledons | Asparagaceae     | <i>Maianthemum</i>   | <i>Maianthemum atropurpureum</i>   | JN045440 |
| Monocotyledons | Asparagaceae     | <i>Maianthemum</i>   | <i>Maianthemum paniculatum</i>     | EU850242 |
| Monocotyledons | Asparagaceae     | <i>Maianthemum</i>   | <i>Maianthemum paniculatum</i>     | EU850243 |
| Monocotyledons | Asparagaceae     | <i>Maianthemum</i>   | <i>Maianthemum purpureum</i>       | EU850221 |
| Monocotyledons | Asparagaceae     | <i>Maianthemum</i>   | <i>Maianthemum purpureum</i>       | JN045460 |
| Monocotyledons | Asparagaceae     | <i>Maianthemum</i>   | <i>Maianthemum purpureum</i>       | JN045461 |
| Monocotyledons | Asparagaceae     | <i>Maianthemum</i>   | <i>Maianthemum purpureum</i>       | JN045462 |
| Monocotyledons | Asparagaceae     | <i>Maianthemum</i>   | <i>Maianthemum purpureum</i>       | JN045463 |
| Monocotyledons | Asparagaceae     | <i>Maianthemum</i>   | <i>Maianthemum purpureum</i>       | JN045464 |

|                |               |                      |                                |          |
|----------------|---------------|----------------------|--------------------------------|----------|
| Monocotyledons | Asparagaceae  | <i>Maianthemum</i>   | <i>Maianthemum purpureum</i>   | JN045465 |
| Monocotyledons | Asparagaceae  | <i>Maianthemum</i>   | <i>Maianthemum purpureum</i>   | JN045466 |
| Monocotyledons | Asparagaceae  | <i>Maianthemum</i>   | <i>Maianthemum tatsienense</i> | EU850228 |
| Monocotyledons | Asparagaceae  | <i>Maianthemum</i>   | <i>Maianthemum tatsienense</i> | JN045469 |
| Monocotyledons | Asparagaceae  | <i>Maianthemum</i>   | <i>Maianthemum tatsienense</i> | JN045470 |
| Monocotyledons | Asparagaceae  | <i>Maianthemum</i>   | <i>Maianthemum tatsienense</i> | JN045471 |
| Monocotyledons | Asparagaceae  | <i>Maianthemum</i>   | <i>Maianthemum tatsienense</i> | JN045472 |
| Monocotyledons | Asparagaceae  | <i>Maianthemum</i>   | <i>Maianthemum tatsienense</i> | JN045473 |
| Monocotyledons | Asparagaceae  | <i>Maianthemum</i>   | <i>Maianthemum tatsienense</i> | JN045474 |
| Monocotyledons | Asparagaceae  | <i>Maianthemum</i>   | <i>Maianthemum tubiferum</i>   | EU850225 |
| Monocotyledons | Asparagaceae  | <i>Maianthemum</i>   | <i>Maianthemum tubiferum</i>   | JN045475 |
| Monocotyledons | Colchicaceae  | <i>Colchicum</i>     | <i>Colchicum filifolium</i>    | DQ088323 |
| Monocotyledons | Colchicaceae  | <i>Colchicum</i>     | <i>Colchicum filifolium</i>    | JF934102 |
| Monocotyledons | Bromeliaceae  | <i>Aechmea</i>       | <i>Aechmea nudicaulis</i>      | JN204618 |
| Monocotyledons | Bromeliaceae  | <i>Aechmea</i>       | <i>Aechmea nudicaulis</i>      | JN204619 |
| Monocotyledons | Bromeliaceae  | <i>Tillandsia</i>    | <i>Tillandsia tenuifolia</i>   | JN204667 |
| Monocotyledons | Bromeliaceae  | <i>Tillandsia</i>    | <i>Tillandsia tenuifolia</i>   | JN204668 |
| Monocotyledons | Juncaceae     | <i>Juncus</i>        | <i>Juncus dudleyi</i>          | HQ596737 |
| Monocotyledons | Juncaceae     | <i>Juncus</i>        | <i>Juncus dudleyi</i>          | HQ596738 |
| Monocotyledons | Poaceae       | <i>Elymus</i>        | <i>Elymus brevipes</i>         | HQ221851 |
| Monocotyledons | Poaceae       | <i>Elymus</i>        | <i>Elymus brevipes</i>         | HQ652802 |
| Monocotyledons | Cyperaceae    | <i>Carex</i>         | <i>Carex hitchcockiana</i>     | FJ597291 |
| Monocotyledons | Cyperaceae    | <i>Carex</i>         | <i>Carex hitchcockiana</i>     | FJ597292 |
| Monocotyledons | Cyperaceae    | <i>Carex</i>         | <i>Carex hitchcockiana</i>     | FJ597293 |
| Monocotyledons | Cyperaceae    | <i>Carex</i>         | <i>Carex hitchcockiana</i>     | FJ597294 |
| Monocotyledons | Cyperaceae    | <i>Carex</i>         | <i>Carex oligocarpa</i>        | FJ597295 |
| Monocotyledons | Cyperaceae    | <i>Carex</i>         | <i>Carex oligocarpa</i>        | FJ597296 |
| Monocotyledons | Cyperaceae    | <i>Carex</i>         | <i>Carex oligocarpa</i>        | DQ006177 |
| Monocotyledons | Poaceae       | <i>Paspalum</i>      | <i>Paspalum dasypleurum</i>    | AY769128 |
| Monocotyledons | Poaceae       | <i>Paspalum</i>      | <i>Paspalum dasypleurum</i>    | DQ104301 |
| Monocotyledons | Poaceae       | <i>Paspalum</i>      | <i>Paspalum dilatatum</i>      | AY769130 |
| Monocotyledons | Poaceae       | <i>Paspalum</i>      | <i>Paspalum dilatatum</i>      | DQ104295 |
| Monocotyledons | Poaceae       | <i>Paspalum</i>      | <i>Paspalum dilatatum</i>      | DQ104296 |
| Monocotyledons | Poaceae       | <i>Paspalum</i>      | <i>Paspalum dilatatum</i>      | DQ104297 |
| Monocotyledons | Poaceae       | <i>Paspalum</i>      | <i>Paspalum dilatatum</i>      | DQ104298 |
| Monocotyledons | Poaceae       | <i>Paspalum</i>      | <i>Paspalum dilatatum</i>      | DQ104299 |
| Monocotyledons | Poaceae       | <i>Paspalum</i>      | <i>Paspalum pauciciliatum</i>  | AY769144 |
| Monocotyledons | Poaceae       | <i>Paspalum</i>      | <i>Paspalum pauciciliatum</i>  | DQ104302 |
| Monocotyledons | Poaceae       | <i>Paspalum</i>      | <i>Paspalum urvillei</i>       | AY769148 |
| Monocotyledons | Poaceae       | <i>Paspalum</i>      | <i>Paspalum urvillei</i>       | DQ104300 |
| Monocotyledons | Cymodoceaceae | <i>Halodule</i>      | <i>Halodule uninervis</i>      | AB571191 |
| Monocotyledons | Cymodoceaceae | <i>Halodule</i>      | <i>Halodule uninervis</i>      | AB571192 |
| Monocotyledons | Cymodoceaceae | <i>Halodule</i>      | <i>Halodule uninervis</i>      | AB571193 |
| Monocotyledons | Cymodoceaceae | <i>Halodule</i>      | <i>Halodule uninervis</i>      | AB571194 |
| Monocotyledons | Cymodoceaceae | <i>Halodule</i>      | <i>Halodule uninervis</i>      | AB571195 |
| Monocotyledons | Bromeliaceae  | <i>Aechmea</i>       | <i>Aechmea racinae</i>         | EF110659 |
| Monocotyledons | Bromeliaceae  | <i>Aechmea</i>       | <i>Aechmea racinae</i>         | HQ913655 |
| Monocotyledons | Cyperaceae    | <i>Carex</i>         | <i>Carex amphibola</i>         | FJ597264 |
| Monocotyledons | Cyperaceae    | <i>Carex</i>         | <i>Carex amphibola</i>         | FJ597265 |
| Monocotyledons | Cyperaceae    | <i>Carex</i>         | <i>Carex amphibola</i>         | FJ597266 |
| Monocotyledons | Cyperaceae    | <i>Carex</i>         | <i>Carex amphibola</i>         | DQ006175 |
| Monocotyledons | Poaceae       | <i>Calamagrostis</i> | <i>Calamagrostis muiriana</i>  | DQ113917 |
| Monocotyledons | Poaceae       | <i>Calamagrostis</i> | <i>Calamagrostis muiriana</i>  | DQ113918 |

|                |                  |                      |                                |          |
|----------------|------------------|----------------------|--------------------------------|----------|
| Monocotyledons | Poaceae          | <i>Calamagrostis</i> | <i>Calamagrostis muiriana</i>  | DQ113919 |
| Monocotyledons | Poaceae          | <i>Calamagrostis</i> | <i>Calamagrostis muiriana</i>  | DQ113920 |
| Monocotyledons | Poaceae          | <i>Calamagrostis</i> | <i>Calamagrostis muiriana</i>  | DQ113921 |
| Monocotyledons | Poaceae          | <i>Calamagrostis</i> | <i>Calamagrostis breweri</i>   | DQ113922 |
| Monocotyledons | Poaceae          | <i>Calamagrostis</i> | <i>Calamagrostis breweri</i>   | DQ113923 |
| Monocotyledons | Poaceae          | <i>Calamagrostis</i> | <i>Calamagrostis breweri</i>   | DQ113924 |
| Monocotyledons | Poaceae          | <i>Calamagrostis</i> | <i>Calamagrostis breweri</i>   | DQ113925 |
| Monocotyledons | Poaceae          | <i>Agrostis</i>      | <i>Agrostis gigantea</i>       | FJ395454 |
| Monocotyledons | Poaceae          | <i>Agrostis</i>      | <i>Agrostis gigantea</i>       | HQ596584 |
| Monocotyledons | Poaceae          | <i>Agrostis</i>      | <i>Agrostis gigantea</i>       | HQ596585 |
| Monocotyledons | Orchidaceae      | <i>Fernandezia</i>   | <i>Fernandezia tica</i>        | FJ564340 |
| Monocotyledons | Orchidaceae      | <i>Fernandezia</i>   | <i>Fernandezia tica</i>        | FJ564442 |
| Monocotyledons | Alismataceae     | <i>Alisma</i>        | <i>Alisma gramineum</i>        | JN043776 |
| Monocotyledons | Alismataceae     | <i>Alisma</i>        | <i>Alisma gramineum</i>        | JN043777 |
| Monocotyledons | Hydrocharitaceae | <i>Najas</i>         | <i>Najas gracillima</i>        | HQ687168 |
| Monocotyledons | Hydrocharitaceae | <i>Najas</i>         | <i>Najas gracillima</i>        | HQ687169 |
| Monocotyledons | Hydrocharitaceae | <i>Najas</i>         | <i>Najas gracillima</i>        | HQ687170 |
| Monocotyledons | Hydrocharitaceae | <i>Najas</i>         | <i>Najas gracillima</i>        | HQ687171 |
| Monocotyledons | Hydrocharitaceae | <i>Najas</i>         | <i>Najas gracillima</i>        | HQ687172 |
| Monocotyledons | Hydrocharitaceae | <i>Najas</i>         | <i>Najas gracillima</i>        | HQ687173 |
| Monocotyledons | Potamogetonaceae | <i>Potamogeton</i>   | <i>Potamogeton illinoensis</i> | DQ786536 |
| Monocotyledons | Potamogetonaceae | <i>Potamogeton</i>   | <i>Potamogeton illinoensis</i> | DQ786537 |
| Monocotyledons | Poaceae          | <i>Stipa</i>         | <i>Stipa papposa</i>           | EU489274 |
| Monocotyledons | Poaceae          | <i>Stipa</i>         | <i>Stipa papposa</i>           | EU204706 |
| Monocotyledons | Poaceae          | <i>Stipa</i>         | <i>Stipa papposa</i>           | EU204707 |
| Monocotyledons | Poaceae          | <i>Stipa</i>         | <i>Stipa papposa</i>           | EU204708 |
| Monocotyledons | Poaceae          | <i>Stipa</i>         | <i>Stipa papposa</i>           | EU204709 |
| Monocotyledons | Poaceae          | <i>Stipa</i>         | <i>Stipa papposa</i>           | EU204710 |
| Monocotyledons | Poaceae          | <i>Elymus</i>        | <i>Elymus nutans</i>           | HQ221835 |
| Monocotyledons | Poaceae          | <i>Elymus</i>        | <i>Elymus nutans</i>           | HQ221845 |
| Monocotyledons | Poaceae          | <i>Elymus</i>        | <i>Elymus nutans</i>           | HQ221847 |
| Monocotyledons | Asparagaceae     | <i>Maianthemum</i>   | <i>Maianthemum canadense</i>   | HQ596762 |
| Monocotyledons | Asparagaceae     | <i>Maianthemum</i>   | <i>Maianthemum canadense</i>   | EU850236 |
| Monocotyledons | Orchidaceae      | <i>Cuitlauzina</i>   | <i>Cuitlauzina candida</i>     | FJ564070 |
| Monocotyledons | Orchidaceae      | <i>Cuitlauzina</i>   | <i>Cuitlauzina candida</i>     | FJ564670 |
| Monocotyledons | Orchidaceae      | <i>Comparettia</i>   | <i>Comparettia bennettii</i>   | FJ564115 |
| Monocotyledons | Orchidaceae      | <i>Comparettia</i>   | <i>Comparettia bennettii</i>   | FJ564365 |
| Monocotyledons | Orchidaceae      | <i>Tsiorchis</i>     | <i>Tsiorchis kimballiana</i>   | HQ404447 |
| Monocotyledons | Orchidaceae      | <i>Tsiorchis</i>     | <i>Tsiorchis kimballiana</i>   | HQ404448 |
| Monocotyledons | Orchidaceae      | <i>Tsiorchis</i>     | <i>Tsiorchis kimballiana</i>   | HQ404449 |
| Monocotyledons | Orchidaceae      | <i>Tsiorchis</i>     | <i>Tsiorchis kimballiana</i>   | HQ404450 |
| Monocotyledons | Orchidaceae      | <i>Tsiorchis</i>     | <i>Tsiorchis kimballiana</i>   | HQ404451 |
| Monocotyledons | Orchidaceae      | <i>Tsiorchis</i>     | <i>Tsiorchis kimballiana</i>   | HQ404452 |
| Monocotyledons | Alismataceae     | <i>Echinodorus</i>   | <i>Echinodorus floribundus</i> | HM367287 |
| Monocotyledons | Alismataceae     | <i>Echinodorus</i>   | <i>Echinodorus floribundus</i> | HM367288 |
| Monocotyledons | Alismataceae     | <i>Echinodorus</i>   | <i>Echinodorus floribundus</i> | HM367305 |
| Monocotyledons | Alismataceae     | <i>Echinodorus</i>   | <i>Echinodorus grisebachii</i> | HM367271 |
| Monocotyledons | Alismataceae     | <i>Echinodorus</i>   | <i>Echinodorus grisebachii</i> | HM367272 |
| Monocotyledons | Alismataceae     | <i>Echinodorus</i>   | <i>Echinodorus grisebachii</i> | HM367273 |
| Monocotyledons | Alismataceae     | <i>Echinodorus</i>   | <i>Echinodorus grisebachii</i> | HM367275 |
| Monocotyledons | Alismataceae     | <i>Echinodorus</i>   | <i>Echinodorus grisebachii</i> | HM367276 |
| Monocotyledons | Alismataceae     | <i>Echinodorus</i>   | <i>Echinodorus grisebachii</i> | HM367277 |
| Monocotyledons | Alismataceae     | <i>Echinodorus</i>   | <i>Echinodorus grisebachii</i> | HM367278 |

|                |                  |                         |                                      |          |
|----------------|------------------|-------------------------|--------------------------------------|----------|
| Monocotyledons | Alismataceae     | <i>Echinodorus</i>      | <i>Echinodorus grisebachii</i>       | HM367279 |
| Monocotyledons | Alismataceae     | <i>Echinodorus</i>      | <i>Echinodorus grisebachii</i>       | HM367280 |
| Monocotyledons | Alismataceae     | <i>Echinodorus</i>      | <i>Echinodorus grisebachii</i>       | HM367281 |
| Monocotyledons | Alismataceae     | <i>Echinodorus</i>      | <i>Echinodorus longiscapus</i>       | HM367289 |
| Monocotyledons | Alismataceae     | <i>Echinodorus</i>      | <i>Echinodorus longiscapus</i>       | HM367292 |
| Monocotyledons | Alismataceae     | <i>Echinodorus</i>      | <i>Echinodorus paniculatus</i>       | HM367285 |
| Monocotyledons | Alismataceae     | <i>Echinodorus</i>      | <i>Echinodorus paniculatus</i>       | HM367306 |
| Monocotyledons | Bromeliaceae     | <i>Aechmea</i>          | <i>Aechmea lingulata</i>             | EF110667 |
| Monocotyledons | Bromeliaceae     | <i>Aechmea</i>          | <i>Aechmea lingulata</i>             | JN204616 |
| Monocotyledons | Bromeliaceae     | <i>Aechmea</i>          | <i>Aechmea lingulata</i>             | JN204617 |
| Monocotyledons | Bromeliaceae     | <i>Aechmea</i>          | <i>Aechmea lingulata</i>             | HQ913652 |
| Monocotyledons | Poaceae          | <i>Calamagrostis</i>    | <i>Calamagrostis erectifolia</i>     | GQ248257 |
| Monocotyledons | Poaceae          | <i>Calamagrostis</i>    | <i>Calamagrostis erectifolia</i>     | EF590676 |
| Monocotyledons | Arecaceae        | <i>Sabal</i>            | <i>Sabal etonia</i>                  | GQ248387 |
| Monocotyledons | Arecaceae        | <i>Sabal</i>            | <i>Sabal etonia</i>                  | EF688515 |
| Monocotyledons | Hydrocharitaceae | <i>Najas</i>            | <i>Najas graminea</i>                | HQ687174 |
| Monocotyledons | Hydrocharitaceae | <i>Najas</i>            | <i>Najas graminea</i>                | HQ687175 |
| Monocotyledons | Hydrocharitaceae | <i>Najas</i>            | <i>Najas graminea</i>                | HQ687176 |
| Monocotyledons | Hydrocharitaceae | <i>Najas</i>            | <i>Najas graminea</i>                | HQ687177 |
| Monocotyledons | Hydrocharitaceae | <i>Najas</i>            | <i>Najas graminea</i>                | HQ687178 |
| Monocotyledons | Hydrocharitaceae | <i>Najas</i>            | <i>Najas graminea</i>                | HQ687179 |
| Monocotyledons | Orchidaceae      | <i>Paraholcoglossum</i> | <i>Paraholcoglossum subulifolium</i> | HQ404477 |
| Monocotyledons | Orchidaceae      | <i>Paraholcoglossum</i> | <i>Paraholcoglossum subulifolium</i> | HQ404478 |
| Monocotyledons | Orchidaceae      | <i>Paraholcoglossum</i> | <i>Paraholcoglossum subulifolium</i> | HQ404479 |
| Monocotyledons | Orchidaceae      | <i>Rhynchostele</i>     | <i>Rhynchostele cordata</i>          | GQ248386 |
| Monocotyledons | Orchidaceae      | <i>Rhynchostele</i>     | <i>Rhynchostele cordata</i>          | FJ564158 |
| Monocotyledons | Orchidaceae      | <i>Rhynchostele</i>     | <i>Rhynchostele cordata</i>          | FJ564666 |
| Monocotyledons | Arecaceae        | <i>Hyphaene</i>         | <i>Hyphaene petersiana</i>           | EU213779 |
| Monocotyledons | Arecaceae        | <i>Hyphaene</i>         | <i>Hyphaene petersiana</i>           | EU213780 |
| Monocotyledons | Colchicaceae     | <i>Colchicum</i>        | <i>Colchicum kesselringii</i>        | EU237058 |
| Monocotyledons | Colchicaceae     | <i>Colchicum</i>        | <i>Colchicum kesselringii</i>        | JF934114 |
| Monocotyledons | Colchicaceae     | <i>Colchicum</i>        | <i>Colchicum robustum</i>            | EU237060 |
| Monocotyledons | Colchicaceae     | <i>Colchicum</i>        | <i>Colchicum robustum</i>            | JF934152 |
| Monocotyledons | Colchicaceae     | <i>Colchicum</i>        | <i>Colchicum robustum</i>            | JF934153 |
| Monocotyledons | Colchicaceae     | <i>Colchicum</i>        | <i>Colchicum robustum</i>            | JF934154 |
| Monocotyledons | Orchidaceae      | <i>Prosthechea</i>      | <i>Prosthechea radiata</i>           | EU213761 |
| Monocotyledons | Orchidaceae      | <i>Prosthechea</i>      | <i>Prosthechea radiata</i>           | EU213762 |
| Monocotyledons | Orchidaceae      | <i>Prosthechea</i>      | <i>Prosthechea radiata</i>           | EU213763 |
| Monocotyledons | Orchidaceae      | <i>Trichopilia</i>      | <i>Trichopilia tortilis</i>          | EU213769 |
| Monocotyledons | Orchidaceae      | <i>Trichopilia</i>      | <i>Trichopilia tortilis</i>          | EU213770 |
| Monocotyledons | Orchidaceae      | <i>Trichopilia</i>      | <i>Trichopilia tortilis</i>          | EU213771 |
| Monocotyledons | Orchidaceae      | <i>Trichopilia</i>      | <i>Trichopilia turialbae</i>         | EU213772 |
| Monocotyledons | Orchidaceae      | <i>Trichopilia</i>      | <i>Trichopilia turialbae</i>         | EU213773 |
| Monocotyledons | Orchidaceae      | <i>Trichopilia</i>      | <i>Trichopilia turialbae</i>         | EU213774 |
| Monocotyledons | Orchidaceae      | <i>Trichopilia</i>      | <i>Trichopilia turialbae</i>         | FJ564132 |
| Monocotyledons | Orchidaceae      | <i>Trichopilia</i>      | <i>Trichopilia turialbae</i>         | FJ564632 |
| Monocotyledons | Poaceae          | <i>Gigantochloa</i>     | <i>Gigantochloa scortechinii</i>     | GU063129 |
| Monocotyledons | Poaceae          | <i>Gigantochloa</i>     | <i>Gigantochloa scortechinii</i>     | HQ697908 |
| Monocotyledons | Poaceae          | <i>Gigantochloa</i>     | <i>Gigantochloa scortechinii</i>     | HQ697909 |
| Monocotyledons | Poaceae          | <i>Gigantochloa</i>     | <i>Gigantochloa scortechinii</i>     | HQ697910 |
| Monocotyledons | Poaceae          | <i>Gigantochloa</i>     | <i>Gigantochloa scortechinii</i>     | HQ697911 |
| Monocotyledons | Poaceae          | <i>Gigantochloa</i>     | <i>Gigantochloa scortechinii</i>     | HQ697912 |
| Monocotyledons | Orchidaceae      | <i>Paraholcoglossum</i> | <i>Paraholcoglossum amesianum</i>    | HQ404436 |

|                |              |                         |                                   |          |
|----------------|--------------|-------------------------|-----------------------------------|----------|
| Monocotyledons | Orchidaceae  | <i>Paraholcoglossum</i> | <i>Paraholcoglossum amesianum</i> | HQ404437 |
| Monocotyledons | Orchidaceae  | <i>Paraholcoglossum</i> | <i>Paraholcoglossum amesianum</i> | HQ404438 |
| Monocotyledons | Orchidaceae  | <i>Paraholcoglossum</i> | <i>Paraholcoglossum amesianum</i> | HQ404439 |
| Monocotyledons | Orchidaceae  | <i>Paraholcoglossum</i> | <i>Paraholcoglossum amesianum</i> | HQ404440 |
| Monocotyledons | Orchidaceae  | <i>Paraholcoglossum</i> | <i>Paraholcoglossum amesianum</i> | HQ404441 |
| Monocotyledons | Orchidaceae  | <i>Tsiorchis</i>        | <i>Tsiorchis wangii</i>           | HQ404480 |
| Monocotyledons | Orchidaceae  | <i>Tsiorchis</i>        | <i>Tsiorchis wangii</i>           | HQ404481 |
| Monocotyledons | Orchidaceae  | <i>Tsiorchis</i>        | <i>Tsiorchis wangii</i>           | HQ404482 |
| Monocotyledons | Asparagaceae | <i>Maianthemum</i>      | <i>Maianthemum dahuricum</i>      | EU850233 |
| Monocotyledons | Asparagaceae | <i>Maianthemum</i>      | <i>Maianthemum dahuricum</i>      | JN045444 |
| Monocotyledons | Asparagaceae | <i>Maianthemum</i>      | <i>Maianthemum gigas</i>          | EU850241 |
| Monocotyledons | Asparagaceae | <i>Maianthemum</i>      | <i>Maianthemum gigas</i>          | JN045445 |
| Monocotyledons | Asparagaceae | <i>Maianthemum</i>      | <i>Maianthemum gongshanense</i>   | EU850214 |
| Monocotyledons | Asparagaceae | <i>Maianthemum</i>      | <i>Maianthemum gongshanense</i>   | JN045446 |
| Monocotyledons | Asparagaceae | <i>Maianthemum</i>      | <i>Maianthemum henryi</i>         | EU850213 |
| Monocotyledons | Asparagaceae | <i>Maianthemum</i>      | <i>Maianthemum henryi</i>         | EU850217 |
| Monocotyledons | Asparagaceae | <i>Maianthemum</i>      | <i>Maianthemum henryi</i>         | EU850224 |
| Monocotyledons | Asparagaceae | <i>Maianthemum</i>      | <i>Maianthemum henryi</i>         | JN045447 |
| Monocotyledons | Asparagaceae | <i>Maianthemum</i>      | <i>Maianthemum henryi</i>         | JN045448 |
| Monocotyledons | Asparagaceae | <i>Maianthemum</i>      | <i>Maianthemum henryi</i>         | JN045449 |
| Monocotyledons | Asparagaceae | <i>Maianthemum</i>      | <i>Maianthemum henryi</i>         | JN045450 |
| Monocotyledons | Asparagaceae | <i>Maianthemum</i>      | <i>Maianthemum henryi</i>         | JN045451 |
| Monocotyledons | Asparagaceae | <i>Maianthemum</i>      | <i>Maianthemum henryi</i>         | JN045452 |
| Monocotyledons | Asparagaceae | <i>Maianthemum</i>      | <i>Maianthemum henryi</i>         | JN045453 |
| Monocotyledons | Poaceae      | <i>Dendrocalamus</i>    | <i>Dendrocalamus pendulus</i>     | HQ697902 |
| Monocotyledons | Poaceae      | <i>Dendrocalamus</i>    | <i>Dendrocalamus pendulus</i>     | HQ697903 |
| Monocotyledons | Poaceae      | <i>Dendrocalamus</i>    | <i>Dendrocalamus pendulus</i>     | HQ697904 |
| Monocotyledons | Poaceae      | <i>Gigantochloa</i>     | <i>Gigantochloa balui</i>         | GU391008 |
| Monocotyledons | Poaceae      | <i>Gigantochloa</i>     | <i>Gigantochloa balui</i>         | GU063125 |
| Monocotyledons | Orchidaceae  | <i>Gomesa</i>           | <i>Gomesa colorata</i>            | FJ564107 |
| Monocotyledons | Orchidaceae  | <i>Gomesa</i>           | <i>Gomesa colorata</i>            | EU935667 |
| Monocotyledons | Orchidaceae  | <i>Gomesa</i>           | <i>Gomesa cornigera</i>           | FJ564387 |
| Monocotyledons | Orchidaceae  | <i>Gomesa</i>           | <i>Gomesa cornigera</i>           | EU935680 |
| Monocotyledons | Orchidaceae  | <i>Gomesa</i>           | <i>Gomesa echinata</i>            | FJ564383 |
| Monocotyledons | Orchidaceae  | <i>Gomesa</i>           | <i>Gomesa echinata</i>            | EU935677 |
| Monocotyledons | Orchidaceae  | <i>Gomesa</i>           | <i>Gomesa kautskyi</i>            | FJ564400 |
| Monocotyledons | Orchidaceae  | <i>Gomesa</i>           | <i>Gomesa kautskyi</i>            | EU935686 |
| Monocotyledons | Orchidaceae  | <i>Gomesa</i>           | <i>Gomesa lietzei</i>             | FJ564638 |
| Monocotyledons | Orchidaceae  | <i>Gomesa</i>           | <i>Gomesa lietzei</i>             | EU935689 |
| Monocotyledons | Orchidaceae  | <i>Gomesa</i>           | <i>Gomesa pubes</i>               | FJ563995 |
| Monocotyledons | Orchidaceae  | <i>Gomesa</i>           | <i>Gomesa pubes</i>               | EU935681 |
| Monocotyledons | Orchidaceae  | <i>Tolumnia</i>         | <i>Tolumnia pulchella</i>         | FJ564265 |
| Monocotyledons | Orchidaceae  | <i>Tolumnia</i>         | <i>Tolumnia pulchella</i>         | EU935692 |
| Monocotyledons | Orchidaceae  | <i>Gomesa</i>           | <i>Gomesa sarcodes</i>            | FJ564399 |
| Monocotyledons | Orchidaceae  | <i>Gomesa</i>           | <i>Gomesa sarcodes</i>            | EU935682 |
| Monocotyledons | Orchidaceae  | <i>Gomesa</i>           | <i>Gomesa silvana</i>             | FJ564672 |
| Monocotyledons | Orchidaceae  | <i>Gomesa</i>           | <i>Gomesa silvana</i>             | EU935676 |
| Monocotyledons | Orchidaceae  | <i>Gomesa</i>           | <i>Gomesa truncata</i>            | FJ564384 |
| Monocotyledons | Orchidaceae  | <i>Gomesa</i>           | <i>Gomesa truncata</i>            | EU935691 |
| Monocotyledons | Orchidaceae  | <i>Gomesa</i>           | <i>Gomesa venusta</i>             | FJ564310 |
| Monocotyledons | Orchidaceae  | <i>Gomesa</i>           | <i>Gomesa venusta</i>             | EU935668 |
| Monocotyledons | Orchidaceae  | <i>Gomesa</i>           | <i>Gomesa widgrenii</i>           | FJ564671 |
| Monocotyledons | Orchidaceae  | <i>Gomesa</i>           | <i>Gomesa widgrenii</i>           | EU935679 |

|                |             |                        |                                    |          |
|----------------|-------------|------------------------|------------------------------------|----------|
| Monocotyledons | Orchidaceae | <i>Gomesa</i>          | <i>Gomesa barbata</i>              | FJ564410 |
| Monocotyledons | Orchidaceae | <i>Gomesa</i>          | <i>Gomesa barbata</i>              | EU935662 |
| Monocotyledons | Orchidaceae | <i>Gomesa</i>          | <i>Gomesa concolor</i>             | FJ564261 |
| Monocotyledons | Orchidaceae | <i>Gomesa</i>          | <i>Gomesa concolor</i>             | FJ564663 |
| Monocotyledons | Orchidaceae | <i>Gomesa</i>          | <i>Gomesa concolor</i>             | EU935664 |
| Monocotyledons | Orchidaceae | <i>Gomesa</i>          | <i>Gomesa hydrophila</i>           | FJ564396 |
| Monocotyledons | Orchidaceae | <i>Gomesa</i>          | <i>Gomesa hydrophila</i>           | EU935665 |
| Monocotyledons | Orchidaceae | <i>Erycina</i>         | <i>Erycina glossomystax</i>        | FJ564592 |
| Monocotyledons | Orchidaceae | <i>Erycina</i>         | <i>Erycina glossomystax</i>        | FJ564593 |
| Monocotyledons | Orchidaceae | <i>Erycina</i>         | <i>Erycina glossomystax</i>        | FJ564595 |
| Monocotyledons | Orchidaceae | <i>Lockhartia</i>      | <i>Lockhartia bennettii</i>        | FJ563975 |
| Monocotyledons | Orchidaceae | <i>Lockhartia</i>      | <i>Lockhartia bennettii</i>        | FJ564528 |
| Monocotyledons | Orchidaceae | <i>Odontoglossum</i>   | <i>Odontoglossum sanguineum</i>    | FJ564028 |
| Monocotyledons | Orchidaceae | <i>Odontoglossum</i>   | <i>Odontoglossum sanguineum</i>    | FJ564501 |
| Monocotyledons | Orchidaceae | <i>Ornithocephalus</i> | <i>Ornithocephalus bicornis</i>    | FJ564567 |
| Monocotyledons | Orchidaceae | <i>Ornithocephalus</i> | <i>Ornithocephalus bicornis</i>    | FJ564647 |
| Monocotyledons | Orchidaceae | <i>Ornithocephalus</i> | <i>Ornithocephalus suarezii</i>    | FJ564563 |
| Monocotyledons | Orchidaceae | <i>Ornithocephalus</i> | <i>Ornithocephalus suarezii</i>    | FJ564566 |
| Monocotyledons | Orchidaceae | <i>Trichocentrum</i>   | <i>Trichocentrum lindenii</i>      | FJ564304 |
| Monocotyledons | Orchidaceae | <i>Trichocentrum</i>   | <i>Trichocentrum lindenii</i>      | FJ564545 |
| Monocotyledons | Orchidaceae | <i>Trichocentrum</i>   | <i>Trichocentrum stipitatum</i>    | FJ564126 |
| Monocotyledons | Orchidaceae | <i>Trichocentrum</i>   | <i>Trichocentrum stipitatum</i>    | FJ564659 |
| Monocotyledons | Orchidaceae | <i>Gomesa</i>          | <i>Gomesa warmingii</i>            | FJ564089 |
| Monocotyledons | Orchidaceae | <i>Gomesa</i>          | <i>Gomesa warmingii</i>            | FJ564391 |
| Monocotyledons | Orchidaceae | <i>Gomesa</i>          | <i>Gomesa warmingii</i>            | FJ564409 |
| Monocotyledons | Orchidaceae | <i>Cischweinfia</i>    | <i>Cischweinfia popowiana</i>      | FJ564312 |
| Monocotyledons | Orchidaceae | <i>Cischweinfia</i>    | <i>Cischweinfia popowiana</i>      | FJ564679 |
| Monocotyledons | Orchidaceae | <i>Cischweinfia</i>    | <i>Cischweinfia pusilla</i>        | FJ564122 |
| Monocotyledons | Orchidaceae | <i>Cischweinfia</i>    | <i>Cischweinfia pusilla</i>        | FJ564651 |
| Monocotyledons | Orchidaceae | <i>Cuitlauzina</i>     | <i>Cuitlauzina pulchella</i>       | FJ564003 |
| Monocotyledons | Orchidaceae | <i>Cuitlauzina</i>     | <i>Cuitlauzina pulchella</i>       | FJ564174 |
| Monocotyledons | Orchidaceae | <i>Cyrtochilum</i>     | <i>Cyrtochilum hoeijeri</i>        | FJ564313 |
| Monocotyledons | Orchidaceae | <i>Cyrtochilum</i>     | <i>Cyrtochilum hoeijeri</i>        | FJ564443 |
| Monocotyledons | Orchidaceae | <i>Cyrtochilum</i>     | <i>Cyrtochilum trifurcatum</i>     | FJ564110 |
| Monocotyledons | Orchidaceae | <i>Cyrtochilum</i>     | <i>Cyrtochilum trifurcatum</i>     | FJ564504 |
| Monocotyledons | Orchidaceae | <i>Ornithocephalus</i> | <i>Ornithocephalus dalstroemii</i> | FJ563990 |
| Monocotyledons | Orchidaceae | <i>Ornithocephalus</i> | <i>Ornithocephalus dalstroemii</i> | FJ564601 |
| Monocotyledons | Orchidaceae | <i>Ornithocephalus</i> | <i>Ornithocephalus dalstroemii</i> | FJ564613 |
| Monocotyledons | Orchidaceae | <i>Tolumnia</i>        | <i>Tolumnia guianensis</i>         | FJ564218 |
| Monocotyledons | Orchidaceae | <i>Tolumnia</i>        | <i>Tolumnia guianensis</i>         | FJ564233 |
| Monocotyledons | Orchidaceae | <i>Tolumnia</i>        | <i>Tolumnia prionochila</i>        | FJ564219 |
| Monocotyledons | Orchidaceae | <i>Tolumnia</i>        | <i>Tolumnia prionochila</i>        | FJ564252 |
| Monocotyledons | Orchidaceae | <i>Comparettia</i>     | <i>Comparettia corydaloides</i>    | FJ564280 |
| Monocotyledons | Orchidaceae | <i>Comparettia</i>     | <i>Comparettia corydaloides</i>    | FJ564360 |
| Monocotyledons | Orchidaceae | <i>Comparettia</i>     | <i>Comparettia tungurahuae</i>     | FJ564523 |
| Monocotyledons | Orchidaceae | <i>Comparettia</i>     | <i>Comparettia tungurahuae</i>     | FJ564611 |
| Monocotyledons | Orchidaceae | <i>Gomesa</i>          | <i>Gomesa forbesii</i>             | FJ564408 |
| Monocotyledons | Orchidaceae | <i>Gomesa</i>          | <i>Gomesa forbesii</i>             | FJ564681 |
| Monocotyledons | Orchidaceae | <i>Gomesa</i>          | <i>Gomesa gardneri</i>             | FJ564684 |
| Monocotyledons | Orchidaceae | <i>Gomesa</i>          | <i>Gomesa gardneri</i>             | EU935666 |
| Monocotyledons | Orchidaceae | <i>Gomesa</i>          | <i>Gomesa longipes</i>             | FJ564358 |
| Monocotyledons | Orchidaceae | <i>Gomesa</i>          | <i>Gomesa longipes</i>             | FJ564394 |
| Monocotyledons | Orchidaceae | <i>Gomesa</i>          | <i>Gomesa varicosa</i>             | FJ564411 |



|                |              |                      |                                    |          |
|----------------|--------------|----------------------|------------------------------------|----------|
| Monocotyledons | Orchidaceae  | <i>Gomesa</i>        | <i>Gomesa varicosa</i>             | FJ564682 |
| Monocotyledons | Orchidaceae  | <i>Trichocentrum</i> | <i>Trichocentrum cosymbephorum</i> | FJ564301 |
| Monocotyledons | Orchidaceae  | <i>Trichocentrum</i> | <i>Trichocentrum cosymbephorum</i> | FJ564473 |
| Monocotyledons | Bromeliaceae | <i>Tillandsia</i>    | <i>Tillandsia bulbosa</i>          | JN204663 |
| Monocotyledons | Bromeliaceae | <i>Tillandsia</i>    | <i>Tillandsia bulbosa</i>          | JN204664 |
| Monocotyledons | Orchidaceae  | <i>Cymbidium</i>     | <i>Cymbidium haematodes</i>        | HM008996 |
| Monocotyledons | Orchidaceae  | <i>Cymbidium</i>     | <i>Cymbidium haematodes</i>        | JN412741 |
| Monocotyledons | Cyperaceae   | <i>Carex</i>         | <i>Carex acidicola</i>             | FJ597262 |
| Monocotyledons | Cyperaceae   | <i>Carex</i>         | <i>Carex acidicola</i>             | FJ597263 |
| Monocotyledons | Cyperaceae   | <i>Carex</i>         | <i>Carex acidicola</i>             | FJ597311 |
| Monocotyledons | Cyperaceae   | <i>Carex</i>         | <i>Carex bulbostylis</i>           | FJ597268 |
| Monocotyledons | Cyperaceae   | <i>Carex</i>         | <i>Carex bulbostylis</i>           | FJ597269 |
| Monocotyledons | Cyperaceae   | <i>Carex</i>         | <i>Carex calcifugens</i>           | FJ597270 |
| Monocotyledons | Cyperaceae   | <i>Carex</i>         | <i>Carex calcifugens</i>           | FJ597271 |
| Monocotyledons | Cyperaceae   | <i>Carex</i>         | <i>Carex conoidea</i>              | FJ597272 |
| Monocotyledons | Cyperaceae   | <i>Carex</i>         | <i>Carex conoidea</i>              | FJ597273 |
| Monocotyledons | Cyperaceae   | <i>Carex</i>         | <i>Carex corrugata</i>             | FJ597274 |
| Monocotyledons | Cyperaceae   | <i>Carex</i>         | <i>Carex corrugata</i>             | FJ597275 |
| Monocotyledons | Cyperaceae   | <i>Carex</i>         | <i>Carex corrugata</i>             | FJ597276 |
| Monocotyledons | Cyperaceae   | <i>Carex</i>         | <i>Carex corrugata</i>             | FJ597277 |
| Monocotyledons | Cyperaceae   | <i>Carex</i>         | <i>Carex flaccosperma</i>          | FJ597278 |
| Monocotyledons | Cyperaceae   | <i>Carex</i>         | <i>Carex flaccosperma</i>          | FJ597279 |
| Monocotyledons | Cyperaceae   | <i>Carex</i>         | <i>Carex flaccosperma</i>          | FJ597280 |
| Monocotyledons | Cyperaceae   | <i>Carex</i>         | <i>Carex glaucodea</i>             | FJ597281 |
| Monocotyledons | Cyperaceae   | <i>Carex</i>         | <i>Carex glaucodea</i>             | FJ597282 |
| Monocotyledons | Cyperaceae   | <i>Carex</i>         | <i>Carex glaucodea</i>             | FJ597283 |
| Monocotyledons | Cyperaceae   | <i>Carex</i>         | <i>Carex glaucodea</i>             | FJ597284 |
| Monocotyledons | Cyperaceae   | <i>Carex</i>         | <i>Carex glaucodea</i>             | FJ597285 |
| Monocotyledons | Cyperaceae   | <i>Carex</i>         | <i>Carex godfreyi</i>              | FJ597286 |
| Monocotyledons | Cyperaceae   | <i>Carex</i>         | <i>Carex godfreyi</i>              | FJ597287 |
| Monocotyledons | Cyperaceae   | <i>Carex</i>         | <i>Carex grisea</i>                | FJ597288 |
| Monocotyledons | Cyperaceae   | <i>Carex</i>         | <i>Carex grisea</i>                | FJ597289 |
| Monocotyledons | Cyperaceae   | <i>Carex</i>         | <i>Carex grisea</i>                | FJ597290 |
| Monocotyledons | Cyperaceae   | <i>Carex</i>         | <i>Carex ouachitana</i>            | FJ597297 |
| Monocotyledons | Cyperaceae   | <i>Carex</i>         | <i>Carex ouachitana</i>            | FJ597298 |
| Monocotyledons | Cyperaceae   | <i>Carex</i>         | <i>Carex ouachitana</i>            | FJ597299 |
| Monocotyledons | Cyperaceae   | <i>Carex</i>         | <i>Carex paeninsulae</i>           | FJ597300 |
| Monocotyledons | Cyperaceae   | <i>Carex</i>         | <i>Carex paeninsulae</i>           | FJ597301 |
| Monocotyledons | Cyperaceae   | <i>Carex</i>         | <i>Carex paeninsulae</i>           | FJ597302 |
| Monocotyledons | Cyperaceae   | <i>Carex</i>         | <i>Carex pigra</i>                 | FJ597303 |
| Monocotyledons | Cyperaceae   | <i>Carex</i>         | <i>Carex pigra</i>                 | FJ597304 |
| Monocotyledons | Cyperaceae   | <i>Carex</i>         | <i>Carex planispicata</i>          | FJ597305 |
| Monocotyledons | Cyperaceae   | <i>Carex</i>         | <i>Carex planispicata</i>          | FJ597306 |
| Monocotyledons | Cyperaceae   | <i>Carex</i>         | <i>Carex planispicata</i>          | FJ597307 |
| Monocotyledons | Cyperaceae   | <i>Carex</i>         | <i>Carex thornei</i>               | FJ597308 |
| Monocotyledons | Cyperaceae   | <i>Carex</i>         | <i>Carex thornei</i>               | FJ597309 |
| Monocotyledons | Cyperaceae   | <i>Carex</i>         | <i>Carex thornei</i>               | FJ597310 |
| Monocotyledons | Bromeliaceae | <i>Billbergia</i>    | <i>Billbergia euphemiae</i>        | JN204630 |
| Monocotyledons | Bromeliaceae | <i>Billbergia</i>    | <i>Billbergia euphemiae</i>        | JN204631 |
| Monocotyledons | Bromeliaceae | <i>Billbergia</i>    | <i>Billbergia euphemiae</i>        | JN204632 |
| Monocotyledons | Bromeliaceae | <i>Aechmea</i>       | <i>Aechmea blumenavii</i>          | JN204599 |
| Monocotyledons | Bromeliaceae | <i>Aechmea</i>       | <i>Aechmea blumenavii</i>          | JN204600 |
| Monocotyledons | Bromeliaceae | <i>Aechmea</i>       | <i>Aechmea bromeliifolia</i>       | JN204601 |

|                |                  |                      |                                      |          |
|----------------|------------------|----------------------|--------------------------------------|----------|
| Monocotyledons | Bromeliaceae     | <i>Aechmea</i>       | <i>Aechmea bromeliifolia</i>         | JN204602 |
| Monocotyledons | Bromeliaceae     | <i>Aechmea</i>       | <i>Aechmea bromeliifolia</i>         | JN204603 |
| Monocotyledons | Bromeliaceae     | <i>Aechmea</i>       | <i>Aechmea bromeliifolia</i>         | HQ913649 |
| Monocotyledons | Bromeliaceae     | <i>Aechmea</i>       | <i>Aechmea coelestis</i>             | JN204608 |
| Monocotyledons | Bromeliaceae     | <i>Aechmea</i>       | <i>Aechmea coelestis</i>             | JN204609 |
| Monocotyledons | Bromeliaceae     | <i>Aechmea</i>       | <i>Aechmea ramosa</i>                | JN204623 |
| Monocotyledons | Bromeliaceae     | <i>Aechmea</i>       | <i>Aechmea ramosa</i>                | JN204624 |
| Monocotyledons | Bromeliaceae     | <i>Aechmea</i>       | <i>Aechmea recurvata</i>             | JN204625 |
| Monocotyledons | Bromeliaceae     | <i>Aechmea</i>       | <i>Aechmea recurvata</i>             | JN204626 |
| Monocotyledons | Bromeliaceae     | <i>Aechmea</i>       | <i>Aechmea recurvata</i>             | JN204627 |
| Monocotyledons | Arecaceae        | <i>Arenga</i>        | <i>Arenga engleri</i>                | JF345020 |
| Monocotyledons | Arecaceae        | <i>Arenga</i>        | <i>Arenga engleri</i>                | JF345021 |
| Monocotyledons | Arecaceae        | <i>Arenga</i>        | <i>Arenga engleri</i>                | JF345022 |
| Monocotyledons | Arecaceae        | <i>Arenga</i>        | <i>Arenga engleri</i>                | JF345023 |
| Monocotyledons | Orchidaceae      | <i>Odontoglossum</i> | <i>Odontoglossum hybrid cultivar</i> | GU136252 |
| Monocotyledons | Orchidaceae      | <i>Odontoglossum</i> | <i>Odontoglossum hybrid cultivar</i> | GU136260 |
| Monocotyledons | Arecaceae        | <i>Arenga</i>        | <i>Arenga westerhoutii</i>           | JF345041 |
| Monocotyledons | Arecaceae        | <i>Arenga</i>        | <i>Arenga westerhoutii</i>           | JF345042 |
| Monocotyledons | Alismataceae     | <i>Echinodorus</i>   | <i>Echinodorus hybrid cultivar</i>   | HM367313 |
| Monocotyledons | Alismataceae     | <i>Echinodorus</i>   | <i>Echinodorus hybrid cultivar</i>   | HM367319 |
| Monocotyledons | Alismataceae     | <i>Echinodorus</i>   | <i>Echinodorus hybrid cultivar</i>   | HM367320 |
| Monocotyledons | Alismataceae     | <i>Echinodorus</i>   | <i>Echinodorus hybrid cultivar</i>   | HM367321 |
| Monocotyledons | Alismataceae     | <i>Echinodorus</i>   | <i>Echinodorus hybrid cultivar</i>   | HM367322 |
| Monocotyledons | Alismataceae     | <i>Echinodorus</i>   | <i>Echinodorus hybrid cultivar</i>   | HM367326 |
| Monocotyledons | Alismataceae     | <i>Echinodorus</i>   | <i>Echinodorus hybrid cultivar</i>   | HM367331 |
| Monocotyledons | Alismataceae     | <i>Echinodorus</i>   | <i>Echinodorus hybrid cultivar</i>   | HM367333 |
| Monocotyledons | Alismataceae     | <i>Echinodorus</i>   | <i>Echinodorus hybrid cultivar</i>   | HM367338 |
| Monocotyledons | Alismataceae     | <i>Echinodorus</i>   | <i>Echinodorus hybrid cultivar</i>   | HM367339 |
| Monocotyledons | Asparagaceae     | <i>Polygonatum</i>   | <i>Polygonatum griffithii</i>        | JN046413 |
| Monocotyledons | Asparagaceae     | <i>Polygonatum</i>   | <i>Polygonatum griffithii</i>        | JN046414 |
| Monocotyledons | Asparagaceae     | <i>Tupistra</i>      | <i>Tupistra grandistigma</i>         | JN047462 |
| Monocotyledons | Asparagaceae     | <i>Tupistra</i>      | <i>Tupistra grandistigma</i>         | JN047463 |
| Monocotyledons | Asparagaceae     | <i>Tupistra</i>      | <i>Tupistra grandistigma</i>         | JN047464 |
| Monocotyledons | Asparagaceae     | <i>Tupistra</i>      | <i>Tupistra grandistigma</i>         | JN047465 |
| Monocotyledons | Asparagaceae     | <i>Tupistra</i>      | <i>Tupistra grandistigma</i>         | JN047466 |
| Monocotyledons | Asparagaceae     | <i>Tupistra</i>      | <i>Tupistra longispica</i>           | JN047467 |
| Monocotyledons | Asparagaceae     | <i>Tupistra</i>      | <i>Tupistra longispica</i>           | JN047468 |
| Monocotyledons | Asparagaceae     | <i>Tupistra</i>      | <i>Tupistra longispica</i>           | JN047469 |
| Monocotyledons | Asparagaceae     | <i>Tupistra</i>      | <i>Tupistra longispica</i>           | JN047470 |
| Monocotyledons | Asparagaceae     | <i>Tupistra</i>      | <i>Tupistra longispica</i>           | JN047471 |
| Monocotyledons | Asparagaceae     | <i>Tupistra</i>      | <i>Tupistra pingbianensis</i>        | JN047472 |
| Monocotyledons | Asparagaceae     | <i>Tupistra</i>      | <i>Tupistra pingbianensis</i>        | JN047473 |
| Monocotyledons | Asparagaceae     | <i>Tupistra</i>      | <i>Tupistra pingbianensis</i>        | JN047474 |
| Monocotyledons | Asparagaceae     | <i>Tupistra</i>      | <i>Tupistra pingbianensis</i>        | JN047475 |
| Monocotyledons | Hydrocharitaceae | <i>Najas</i>         | <i>Najas oguraensis</i>              | HQ687188 |
| Monocotyledons | Hydrocharitaceae | <i>Najas</i>         | <i>Najas oguraensis</i>              | HQ687189 |
| Monocotyledons | Hydrocharitaceae | <i>Najas</i>         | <i>Najas oguraensis</i>              | HQ687190 |
| Monocotyledons | Hydrocharitaceae | <i>Najas</i>         | <i>Najas chinensis</i>               | HQ687191 |
| Monocotyledons | Hydrocharitaceae | <i>Najas</i>         | <i>Najas chinensis</i>               | HQ687192 |
| Monocotyledons | Hydrocharitaceae | <i>Najas</i>         | <i>Najas chinensis</i>               | HQ687193 |
| Monocotyledons | Arecaceae        | <i>Arenga</i>        | <i>Arenga hastata</i>                | JF345005 |
| Monocotyledons | Arecaceae        | <i>Arenga</i>        | <i>Arenga hastata</i>                | JF345019 |
| Monocotyledons | Arecaceae        | <i>Arenga</i>        | <i>Arenga hastata</i>                | JF345024 |

|                |              |                   |                               |          |
|----------------|--------------|-------------------|-------------------------------|----------|
| Monocotyledons | Arecaceae    | <i>Arenga</i>     | <i>Arenga obtusifolia</i>     | JF345032 |
| Monocotyledons | Arecaceae    | <i>Arenga</i>     | <i>Arenga obtusifolia</i>     | JF345033 |
| Monocotyledons | Arecaceae    | <i>Arenga</i>     | <i>Arenga ryukyuensis</i>     | JF345036 |
| Monocotyledons | Arecaceae    | <i>Arenga</i>     | <i>Arenga ryukyuensis</i>     | JF345037 |
| Monocotyledons | Arecaceae    | <i>Wallichia</i>  | <i>Wallichia gracilis</i>     | JF345072 |
| Monocotyledons | Arecaceae    | <i>Wallichia</i>  | <i>Wallichia gracilis</i>     | JF345075 |
| Monocotyledons | Arecaceae    | <i>Wallichia</i>  | <i>Wallichia gracilis</i>     | JF345076 |
| Monocotyledons | Bromeliaceae | <i>Aechmea</i>    | <i>Aechmea bicolor</i>        | JN204597 |
| Monocotyledons | Bromeliaceae | <i>Aechmea</i>    | <i>Aechmea bicolor</i>        | JN204598 |
| Monocotyledons | Bromeliaceae | <i>Aechmea</i>    | <i>Aechmea caudata</i>        | JN204605 |
| Monocotyledons | Bromeliaceae | <i>Aechmea</i>    | <i>Aechmea caudata</i>        | JN204606 |
| Monocotyledons | Bromeliaceae | <i>Aechmea</i>    | <i>Aechmea caudata</i>        | JN204607 |
| Monocotyledons | Bromeliaceae | <i>Aechmea</i>    | <i>Aechmea curranii</i>       | JN204610 |
| Monocotyledons | Bromeliaceae | <i>Aechmea</i>    | <i>Aechmea curranii</i>       | JN204611 |
| Monocotyledons | Bromeliaceae | <i>Aechmea</i>    | <i>Aechmea curranii</i>       | JN204612 |
| Monocotyledons | Bromeliaceae | <i>Aechmea</i>    | <i>Aechmea phanerophlebia</i> | JN204620 |
| Monocotyledons | Bromeliaceae | <i>Aechmea</i>    | <i>Aechmea phanerophlebia</i> | JN204621 |
| Monocotyledons | Bromeliaceae | <i>Aechmea</i>    | <i>Aechmea phanerophlebia</i> | JN204622 |
| Monocotyledons | Bromeliaceae | <i>Billbergia</i> | <i>Billbergia distachya</i>   | JN204628 |
| Monocotyledons | Bromeliaceae | <i>Billbergia</i> | <i>Billbergia distachya</i>   | JN204629 |
| Monocotyledons | Bromeliaceae | <i>Billbergia</i> | <i>Billbergia chlorostica</i> | JN204633 |
| Monocotyledons | Bromeliaceae | <i>Billbergia</i> | <i>Billbergia chlorostica</i> | JN204634 |
| Monocotyledons | Bromeliaceae | <i>Billbergia</i> | <i>Billbergia chlorostica</i> | JN204635 |
| Monocotyledons | Bromeliaceae | <i>Tillandsia</i> | <i>Tillandsia polystachia</i> | JN204665 |
| Monocotyledons | Bromeliaceae | <i>Tillandsia</i> | <i>Tillandsia polystachia</i> | JN204666 |
| Monocotyledons | Colchicaceae | <i>Colchicum</i>  | <i>Colchicum arenarium</i>    | JF934062 |
| Monocotyledons | Colchicaceae | <i>Colchicum</i>  | <i>Colchicum arenarium</i>    | JF934063 |
| Monocotyledons | Colchicaceae | <i>Colchicum</i>  | <i>Colchicum atticum</i>      | JF934066 |
| Monocotyledons | Colchicaceae | <i>Colchicum</i>  | <i>Colchicum atticum</i>      | JF934067 |
| Monocotyledons | Colchicaceae | <i>Colchicum</i>  | <i>Colchicum bivonae</i>      | JF934073 |
| Monocotyledons | Colchicaceae | <i>Colchicum</i>  | <i>Colchicum bivonae</i>      | JF934074 |
| Monocotyledons | Colchicaceae | <i>Colchicum</i>  | <i>Colchicum boissieri</i>    | JF934075 |
| Monocotyledons | Colchicaceae | <i>Colchicum</i>  | <i>Colchicum boissieri</i>    | JF934076 |
| Monocotyledons | Colchicaceae | <i>Colchicum</i>  | <i>Colchicum freynii</i>      | JF934103 |
| Monocotyledons | Colchicaceae | <i>Colchicum</i>  | <i>Colchicum freynii</i>      | JF934104 |
| Monocotyledons | Colchicaceae | <i>Colchicum</i>  | <i>Colchicum ritchii</i>      | JF934150 |
| Monocotyledons | Colchicaceae | <i>Colchicum</i>  | <i>Colchicum ritchii</i>      | JF934151 |
| Monocotyledons | Colchicaceae | <i>Colchicum</i>  | <i>Colchicum schimperi</i>    | JF934156 |
| Monocotyledons | Colchicaceae | <i>Colchicum</i>  | <i>Colchicum schimperi</i>    | JF934157 |
| Monocotyledons | Colchicaceae | <i>Colchicum</i>  | <i>Colchicum trigynum</i>     | JF934170 |
| Monocotyledons | Colchicaceae | <i>Colchicum</i>  | <i>Colchicum trigynum</i>     | JF934171 |
| Monocotyledons | Colchicaceae | <i>Colchicum</i>  | <i>Colchicum triphyllum</i>   | JF934172 |
| Monocotyledons | Colchicaceae | <i>Colchicum</i>  | <i>Colchicum triphyllum</i>   | JF934173 |
| Monocotyledons | Colchicaceae | <i>Colchicum</i>  | <i>Colchicum triphyllum</i>   | JF934174 |
| Monocotyledons | Zosteraceae  | <i>Zostera</i>    | <i>Zostera marina</i>         | DQ786516 |
| Monocotyledons | Zosteraceae  | <i>Zostera</i>    | <i>Zostera marina</i>         | JN225326 |
| Monocotyledons | Zosteraceae  | <i>Zostera</i>    | <i>Zostera marina</i>         | JN225327 |
| Monocotyledons | Zosteraceae  | <i>Zostera</i>    | <i>Zostera marina</i>         | JN225328 |
| Monocotyledons | Iridaceae    | <i>Iris</i>       | <i>Iris germanica</i>         | JN044979 |
| Monocotyledons | Iridaceae    | <i>Iris</i>       | <i>Iris germanica</i>         | JN044980 |
| Monocotyledons | Iridaceae    | <i>Iris</i>       | <i>Iris chrysographes</i>     | JN044960 |
| Monocotyledons | Iridaceae    | <i>Iris</i>       | <i>Iris chrysographes</i>     | JN044961 |
| Monocotyledons | Iridaceae    | <i>Iris</i>       | <i>Iris chrysographes</i>     | JN044962 |

|                |             |                |                         |          |
|----------------|-------------|----------------|-------------------------|----------|
| Monocotyledons | Iridaceae   | <i>Iris</i>    | <i>Iris ensata</i>      | JN044975 |
| Monocotyledons | Iridaceae   | <i>Iris</i>    | <i>Iris ensata</i>      | JN044976 |
| Monocotyledons | Zosteraceae | <i>Zostera</i> | <i>Zostera noltei</i>   | JN225329 |
| Monocotyledons | Zosteraceae | <i>Zostera</i> | <i>Zostera noltei</i>   | JN225330 |
| Monocotyledons | Iridaceae   | <i>Iris</i>    | <i>Iris domestica</i>   | GQ434907 |
| Monocotyledons | Iridaceae   | <i>Iris</i>    | <i>Iris domestica</i>   | GQ434908 |
| Monocotyledons | Iridaceae   | <i>Iris</i>    | <i>Iris pseudacorus</i> | JN045000 |
| Monocotyledons | Iridaceae   | <i>Iris</i>    | <i>Iris pseudacorus</i> | JN045001 |
| Monocotyledons | Iridaceae   | <i>Iris</i>    | <i>Iris pseudacorus</i> | JN045002 |
| Monocotyledons | Iridaceae   | <i>Iris</i>    | <i>Iris tectorum</i>    | GQ435429 |
| Monocotyledons | Iridaceae   | <i>Iris</i>    | <i>Iris tectorum</i>    | GQ435430 |
| Monocotyledons | Iridaceae   | <i>Iris</i>    | <i>Iris tectorum</i>    | JN045015 |
| Monocotyledons | Iridaceae   | <i>Iris</i>    | <i>Iris tectorum</i>    | JN045016 |
| Monocotyledons | Iridaceae   | <i>Iris</i>    | <i>Iris tectorum</i>    | JN045017 |
| Monocotyledons | Iridaceae   | <i>Iris</i>    | <i>Iris tectorum</i>    | JN045018 |
| Monocotyledons | Iridaceae   | <i>Iris</i>    | <i>Iris tectorum</i>    | JN045019 |
| Monocotyledons | Iridaceae   | <i>Iris</i>    | <i>Iris tectorum</i>    | JN045020 |
| Monocotyledons | Iridaceae   | <i>Iris</i>    | <i>Iris forrestii</i>   | JN044977 |
| Monocotyledons | Iridaceae   | <i>Iris</i>    | <i>Iris forrestii</i>   | JN044978 |
| Monocotyledons | Iridaceae   | <i>Iris</i>    | <i>Iris dichotoma</i>   | JN044973 |
| Monocotyledons | Iridaceae   | <i>Iris</i>    | <i>Iris dichotoma</i>   | JN044974 |
| Monocotyledons | Zosteraceae | <i>Zostera</i> | <i>Zostera muelleri</i> | GU906227 |
| Monocotyledons | Zosteraceae | <i>Zostera</i> | <i>Zostera muelleri</i> | GU906228 |
| Monocotyledons | Iridaceae   | <i>Iris</i>    | <i>Iris humilis</i>     | FM253735 |
| Monocotyledons | Iridaceae   | <i>Iris</i>    | <i>Iris humilis</i>     | FM253736 |
| Monocotyledons | Iridaceae   | <i>Iris</i>    | <i>Iris humilis</i>     | FM253737 |
| Monocotyledons | Iridaceae   | <i>Iris</i>    | <i>Iris humilis</i>     | FM253738 |
| Monocotyledons | Iridaceae   | <i>Iris</i>    | <i>Iris humilis</i>     | FM253739 |
| Monocotyledons | Iridaceae   | <i>Iris</i>    | <i>Iris humilis</i>     | FM253740 |
| Monocotyledons | Iridaceae   | <i>Iris</i>    | <i>Iris humilis</i>     | FM253741 |
| Monocotyledons | Iridaceae   | <i>Iris</i>    | <i>Iris humilis</i>     | FM253742 |
| Monocotyledons | Iridaceae   | <i>Iris</i>    | <i>Iris humilis</i>     | FM253743 |
| Monocotyledons | Iridaceae   | <i>Iris</i>    | <i>Iris humilis</i>     | FM253744 |
| Monocotyledons | Iridaceae   | <i>Iris</i>    | <i>Iris humilis</i>     | FM253745 |
| Monocotyledons | Iridaceae   | <i>Iris</i>    | <i>Iris humilis</i>     | FM253746 |
| Monocotyledons | Iridaceae   | <i>Iris</i>    | <i>Iris humilis</i>     | FM253747 |
| Monocotyledons | Iridaceae   | <i>Iris</i>    | <i>Iris lactea</i>      | JN044989 |
| Monocotyledons | Iridaceae   | <i>Iris</i>    | <i>Iris lactea</i>      | JN044990 |
| Monocotyledons | Iridaceae   | <i>Iris</i>    | <i>Iris lactea</i>      | JN044991 |
| Monocotyledons | Iridaceae   | <i>Iris</i>    | <i>Iris lactea</i>      | JN044992 |
| Monocotyledons | Iridaceae   | <i>Iris</i>    | <i>Iris loczyi</i>      | JN044994 |
| Monocotyledons | Iridaceae   | <i>Iris</i>    | <i>Iris loczyi</i>      | JN044995 |
| Monocotyledons | Iridaceae   | <i>Iris</i>    | <i>Iris loczyi</i>      | JN044996 |
| Monocotyledons | Iridaceae   | <i>Iris</i>    | <i>Iris ruthenica</i>   | JN045005 |
| Monocotyledons | Iridaceae   | <i>Iris</i>    | <i>Iris ruthenica</i>   | JN045006 |
| Monocotyledons | Iridaceae   | <i>Iris</i>    | <i>Iris ruthenica</i>   | JN045007 |
| Monocotyledons | Iridaceae   | <i>Iris</i>    | <i>Iris ruthenica</i>   | JN045008 |
| Monocotyledons | Iridaceae   | <i>Iris</i>    | <i>Iris ruthenica</i>   | JN045009 |
| Monocotyledons | Iridaceae   | <i>Iris</i>    | <i>Iris sanguinea</i>   | JN045010 |
| Monocotyledons | Iridaceae   | <i>Iris</i>    | <i>Iris sanguinea</i>   | JN045011 |
| Monocotyledons | Iridaceae   | <i>Iris</i>    | <i>Iris sanguinea</i>   | JN045012 |
| Monocotyledons | Iridaceae   | <i>Iris</i>    | <i>Iris tenuifolia</i>  | JN045021 |
| Monocotyledons | Iridaceae   | <i>Iris</i>    | <i>Iris tenuifolia</i>  | JN045022 |

|                |                  |                  |                               |          |
|----------------|------------------|------------------|-------------------------------|----------|
| Monocotyledons | Iridaceae        | <i>Iris</i>      | <i>Iris tigridia</i>          | JN045023 |
| Monocotyledons | Iridaceae        | <i>Iris</i>      | <i>Iris tigridia</i>          | JN045024 |
| Monocotyledons | Iridaceae        | <i>Iris</i>      | <i>Iris uniflora</i>          | JN045025 |
| Monocotyledons | Iridaceae        | <i>Iris</i>      | <i>Iris uniflora</i>          | JN045026 |
| Monocotyledons | Iridaceae        | <i>Iris</i>      | <i>Iris ventricosa</i>        | JN045028 |
| Monocotyledons | Iridaceae        | <i>Iris</i>      | <i>Iris ventricosa</i>        | JN045029 |
| Monocotyledons | Zingiberaceae    | <i>Amomum</i>    | <i>Amomum glabrum</i>         | JN043930 |
| Monocotyledons | Zingiberaceae    | <i>Amomum</i>    | <i>Amomum glabrum</i>         | JN043931 |
| Monocotyledons | Zingiberaceae    | <i>Amomum</i>    | <i>Amomum longipetiolatum</i> | JN043938 |
| Monocotyledons | Zingiberaceae    | <i>Amomum</i>    | <i>Amomum longipetiolatum</i> | JN043939 |
| Monocotyledons | Zingiberaceae    | <i>Amomum</i>    | <i>Amomum villosum</i>        | GQ118656 |
| Monocotyledons | Zingiberaceae    | <i>Amomum</i>    | <i>Amomum villosum</i>        | GU180423 |
| Monocotyledons | Iridaceae        | <i>Iris</i>      | <i>Iris delavayi</i>          | JN044971 |
| Monocotyledons | Iridaceae        | <i>Iris</i>      | <i>Iris delavayi</i>          | JN044972 |
| Monocotyledons | Iridaceae        | <i>Iris</i>      | <i>Iris japonica</i>          | JN044983 |
| Monocotyledons | Iridaceae        | <i>Iris</i>      | <i>Iris japonica</i>          | JN044984 |
| Monocotyledons | Iridaceae        | <i>Iris</i>      | <i>Iris japonica</i>          | JN044985 |
| Monocotyledons | Iridaceae        | <i>Iris</i>      | <i>Iris japonica</i>          | JN044986 |
| Monocotyledons | Iridaceae        | <i>Iris</i>      | <i>Iris japonica</i>          | JN044987 |
| Monocotyledons | Iridaceae        | <i>Iris</i>      | <i>Iris japonica</i>          | JN044988 |
| Monocotyledons | Iridaceae        | <i>Iris</i>      | <i>Iris missouriensis</i>     | EF434718 |
| Monocotyledons | Iridaceae        | <i>Iris</i>      | <i>Iris missouriensis</i>     | EF434719 |
| Monocotyledons | Iridaceae        | <i>Iris</i>      | <i>Iris missouriensis</i>     | EF434720 |
| Monocotyledons | Iridaceae        | <i>Iris</i>      | <i>Iris missouriensis</i>     | EF434721 |
| Monocotyledons | Iridaceae        | <i>Iris</i>      | <i>Iris missouriensis</i>     | EF434722 |
| Monocotyledons | Iridaceae        | <i>Iris</i>      | <i>Iris missouriensis</i>     | EF434723 |
| Monocotyledons | Iridaceae        | <i>Iris</i>      | <i>Iris missouriensis</i>     | EF434724 |
| Monocotyledons | Xanthorrhoeaceae | <i>Haworthia</i> | <i>Haworthia aristata</i>     | HQ646850 |
| Monocotyledons | Xanthorrhoeaceae | <i>Haworthia</i> | <i>Haworthia aristata</i>     | HQ646851 |
| Monocotyledons | Xanthorrhoeaceae | <i>Haworthia</i> | <i>Haworthia attenuata</i>    | HQ646880 |
| Monocotyledons | Xanthorrhoeaceae | <i>Haworthia</i> | <i>Haworthia attenuata</i>    | HQ646881 |
| Monocotyledons | Xanthorrhoeaceae | <i>Haworthia</i> | <i>Haworthia cymbiformis</i>  | HQ646865 |
| Monocotyledons | Xanthorrhoeaceae | <i>Haworthia</i> | <i>Haworthia cymbiformis</i>  | HQ646866 |
| Monocotyledons | Xanthorrhoeaceae | <i>Haworthia</i> | <i>Haworthia cooperi</i>      | HQ646854 |
| Monocotyledons | Xanthorrhoeaceae | <i>Haworthia</i> | <i>Haworthia cooperi</i>      | HQ646855 |
| Monocotyledons | Xanthorrhoeaceae | <i>Haworthia</i> | <i>Haworthia cooperi</i>      | HQ646856 |
| Monocotyledons | Xanthorrhoeaceae | <i>Haworthia</i> | <i>Haworthia cooperi</i>      | HQ646857 |
| Monocotyledons | Xanthorrhoeaceae | <i>Haworthia</i> | <i>Haworthia cooperi</i>      | HQ646858 |
| Monocotyledons | Xanthorrhoeaceae | <i>Haworthia</i> | <i>Haworthia cooperi</i>      | HQ646859 |
| Monocotyledons | Xanthorrhoeaceae | <i>Haworthia</i> | <i>Haworthia cooperi</i>      | HQ646860 |
| Monocotyledons | Xanthorrhoeaceae | <i>Haworthia</i> | <i>Haworthia cooperi</i>      | HQ646861 |
| Monocotyledons | Xanthorrhoeaceae | <i>Haworthia</i> | <i>Haworthia cooperi</i>      | HQ646862 |
| Monocotyledons | Xanthorrhoeaceae | <i>Haworthia</i> | <i>Haworthia cooperi</i>      | HQ646863 |
| Monocotyledons | Xanthorrhoeaceae | <i>Haworthia</i> | <i>Haworthia cooperi</i>      | HQ646864 |
| Monocotyledons | Xanthorrhoeaceae | <i>Haworthia</i> | <i>Haworthia glauca</i>       | HQ646884 |
| Monocotyledons | Xanthorrhoeaceae | <i>Haworthia</i> | <i>Haworthia glauca</i>       | HQ646885 |
| Monocotyledons | Xanthorrhoeaceae | <i>Haworthia</i> | <i>Haworthia glauca</i>       | HQ646886 |
| Monocotyledons | Zingiberaceae    | <i>Amomum</i>    | <i>Amomum compactum</i>       | GQ118660 |
| Monocotyledons | Zingiberaceae    | <i>Amomum</i>    | <i>Amomum compactum</i>       | JN043924 |
| Monocotyledons | Zingiberaceae    | <i>Amomum</i>    | <i>Amomum compactum</i>       | JN043925 |
| Monocotyledons | Zingiberaceae    | <i>Amomum</i>    | <i>Amomum compactum</i>       | JN043926 |
| Monocotyledons | Zingiberaceae    | <i>Amomum</i>    | <i>Amomum koenigii</i>        | JN043932 |
| Monocotyledons | Zingiberaceae    | <i>Amomum</i>    | <i>Amomum koenigii</i>        | JN043933 |
| Monocotyledons | Zingiberaceae    | <i>Amomum</i>    | <i>Amomum koenigii</i>        | JN043934 |

|                |               |                      |                                |          |
|----------------|---------------|----------------------|--------------------------------|----------|
| Monocotyledons | Zingiberaceae | <i>Amomum</i>        | <i>Amomum koenigii</i>         | JN043935 |
| Monocotyledons | Zingiberaceae | <i>Amomum</i>        | <i>Amomum maximum</i>          | JN043940 |
| Monocotyledons | Zingiberaceae | <i>Amomum</i>        | <i>Amomum maximum</i>          | JN043941 |
| Monocotyledons | Zingiberaceae | <i>Amomum</i>        | <i>Amomum maximum</i>          | JN043942 |
| Monocotyledons | Zingiberaceae | <i>Amomum</i>        | <i>Amomum menglaense</i>       | JN043943 |
| Monocotyledons | Zingiberaceae | <i>Amomum</i>        | <i>Amomum menglaense</i>       | JN043944 |
| Monocotyledons | Zingiberaceae | <i>Amomum</i>        | <i>Amomum menglaense</i>       | JN043945 |
| Monocotyledons | Zingiberaceae | <i>Amomum</i>        | <i>Amomum menglaense</i>       | JN043946 |
| Monocotyledons | Zingiberaceae | <i>Amomum</i>        | <i>Amomum purpureorubrum</i>   | JN043959 |
| Monocotyledons | Zingiberaceae | <i>Amomum</i>        | <i>Amomum purpureorubrum</i>   | JN043960 |
| Monocotyledons | Zingiberaceae | <i>Amomum</i>        | <i>Amomum quadratolaminare</i> | JN043961 |
| Monocotyledons | Zingiberaceae | <i>Amomum</i>        | <i>Amomum quadratolaminare</i> | JN043962 |
| Monocotyledons | Zingiberaceae | <i>Amomum</i>        | <i>Amomum quadratolaminare</i> | JN043963 |
| Monocotyledons | Zingiberaceae | <i>Amomum</i>        | <i>Amomum quadratolaminare</i> | JN043964 |
| Monocotyledons | Zingiberaceae | <i>Amomum</i>        | <i>Amomum quadratolaminare</i> | JN043965 |
| Monocotyledons | Zingiberaceae | <i>Amomum</i>        | <i>Amomum sericeum</i>         | JN043972 |
| Monocotyledons | Zingiberaceae | <i>Amomum</i>        | <i>Amomum sericeum</i>         | JN043973 |
| Monocotyledons | Zingiberaceae | <i>Amomum</i>        | <i>Amomum subcapitatum</i>     | JN043974 |
| Monocotyledons | Zingiberaceae | <i>Amomum</i>        | <i>Amomum subcapitatum</i>     | JN043975 |
| Monocotyledons | Orchidaceae   | <i>Rhynchosyilis</i> | <i>Rhynchosyilis retusa</i>    | GQ251332 |
| Monocotyledons | Orchidaceae   | <i>Rhynchosyilis</i> | <i>Rhynchosyilis retusa</i>    | GQ251333 |
| Monocotyledons | Orchidaceae   | <i>Rhynchosyilis</i> | <i>Rhynchosyilis retusa</i>    | GQ251334 |
| Monocotyledons | Orchidaceae   | <i>Rhynchosyilis</i> | <i>Rhynchosyilis gigantea</i>  | GQ251323 |
| Monocotyledons | Orchidaceae   | <i>Rhynchosyilis</i> | <i>Rhynchosyilis gigantea</i>  | GQ251324 |
| Monocotyledons | Orchidaceae   | <i>Rhynchosyilis</i> | <i>Rhynchosyilis gigantea</i>  | GQ251325 |
| Monocotyledons | Orchidaceae   | <i>Rhynchosyilis</i> | <i>Rhynchosyilis gigantea</i>  | GQ251326 |
| Monocotyledons | Orchidaceae   | <i>Rhynchosyilis</i> | <i>Rhynchosyilis gigantea</i>  | GQ251327 |
| Monocotyledons | Orchidaceae   | <i>Rhynchosyilis</i> | <i>Rhynchosyilis gigantea</i>  | GQ251328 |
| Monocotyledons | Orchidaceae   | <i>Rhynchosyilis</i> | <i>Rhynchosyilis gigantea</i>  | GQ251329 |
| Monocotyledons | Orchidaceae   | <i>Rhynchosyilis</i> | <i>Rhynchosyilis gigantea</i>  | GQ251330 |
| Monocotyledons | Orchidaceae   | <i>Rhynchosyilis</i> | <i>Rhynchosyilis gigantea</i>  | GQ251331 |
| Monocotyledons | Iridaceae     | <i>Iris</i>          | <i>Iris wattii</i>             | JN045030 |
| Monocotyledons | Iridaceae     | <i>Iris</i>          | <i>Iris wattii</i>             | JN045031 |
| Monocotyledons | Iridaceae     | <i>Iris</i>          | <i>Iris collettii</i>          | JN044963 |
| Monocotyledons | Iridaceae     | <i>Iris</i>          | <i>Iris collettii</i>          | JN044964 |
| Monocotyledons | Iridaceae     | <i>Iris</i>          | <i>Iris collettii</i>          | JN044965 |
| Monocotyledons | Zingiberaceae | <i>Amomum</i>        | <i>Amomum petaloideum</i>      | JN043955 |
| Monocotyledons | Zingiberaceae | <i>Amomum</i>        | <i>Amomum petaloideum</i>      | JN043956 |
| Monocotyledons | Zingiberaceae | <i>Amomum</i>        | <i>Amomum petaloideum</i>      | JN043957 |
| Monocotyledons | Zingiberaceae | <i>Amomum</i>        | <i>Amomum petaloideum</i>      | JN043958 |
| Monocotyledons | Iridaceae     | <i>Iris</i>          | <i>Iris mandshurica</i>        | FM253719 |
| Monocotyledons | Iridaceae     | <i>Iris</i>          | <i>Iris mandshurica</i>        | FM253720 |
| Monocotyledons | Iridaceae     | <i>Iris</i>          | <i>Iris mandshurica</i>        | FM253721 |
| Monocotyledons | Iridaceae     | <i>Iris</i>          | <i>Iris mandshurica</i>        | FM253722 |
| Monocotyledons | Iridaceae     | <i>Iris</i>          | <i>Iris mandshurica</i>        | FM253723 |
| Monocotyledons | Iridaceae     | <i>Iris</i>          | <i>Iris mandshurica</i>        | FM253724 |
| Monocotyledons | Iridaceae     | <i>Iris</i>          | <i>Iris mandshurica</i>        | FM253725 |
| Monocotyledons | Iridaceae     | <i>Iris</i>          | <i>Iris mandshurica</i>        | FM253726 |
| Monocotyledons | Iridaceae     | <i>Iris</i>          | <i>Iris mandshurica</i>        | FM253727 |
| Monocotyledons | Iridaceae     | <i>Iris</i>          | <i>Iris mandshurica</i>        | FM253728 |
| Monocotyledons | Iridaceae     | <i>Iris</i>          | <i>Iris mandshurica</i>        | FM253729 |
| Monocotyledons | Iridaceae     | <i>Iris</i>          | <i>Iris mandshurica</i>        | FM253730 |
| Monocotyledons | Iridaceae     | <i>Iris</i>          | <i>Iris mandshurica</i>        | FM253731 |

|                |             |                     |                                 |          |
|----------------|-------------|---------------------|---------------------------------|----------|
| Monocotyledons | Iridaceae   | <i>Iris</i>         | <i>Iris mandshurica</i>         | FM253732 |
| Monocotyledons | Iridaceae   | <i>Iris</i>         | <i>Iris mandshurica</i>         | FM253733 |
| Monocotyledons | Iridaceae   | <i>Iris</i>         | <i>Iris mandshurica</i>         | FM253734 |
| Monocotyledons | Orchidaceae | <i>Aulosepalum</i>  | <i>Aulosepalum pyramidale</i>   | AM884884 |
| Monocotyledons | Orchidaceae | <i>Aulosepalum</i>  | <i>Aulosepalum pyramidale</i>   | AM884885 |
| Monocotyledons | Orchidaceae | <i>Aulosepalum</i>  | <i>Aulosepalum ramentaceum</i>  | AM884882 |
| Monocotyledons | Orchidaceae | <i>Aulosepalum</i>  | <i>Aulosepalum ramentaceum</i>  | AM884883 |
| Monocotyledons | Orchidaceae | <i>Aulosepalum</i>  | <i>Aulosepalum oestlundii</i>   | AM884886 |
| Monocotyledons | Orchidaceae | <i>Aulosepalum</i>  | <i>Aulosepalum oestlundii</i>   | AM884887 |
| Monocotyledons | Orchidaceae | <i>Aulosepalum</i>  | <i>Aulosepalum hemichreum</i>   | AM884889 |
| Monocotyledons | Orchidaceae | <i>Aulosepalum</i>  | <i>Aulosepalum hemichreum</i>   | AM884890 |
| Monocotyledons | Orchidaceae | <i>Holcoglossum</i> | <i>Holcoglossum flavescens</i>  | HQ404442 |
| Monocotyledons | Orchidaceae | <i>Holcoglossum</i> | <i>Holcoglossum flavescens</i>  | HQ404443 |
| Monocotyledons | Orchidaceae | <i>Holcoglossum</i> | <i>Holcoglossum flavescens</i>  | HQ404444 |
| Monocotyledons | Orchidaceae | <i>Holcoglossum</i> | <i>Holcoglossum flavescens</i>  | HQ404445 |
| Monocotyledons | Orchidaceae | <i>Holcoglossum</i> | <i>Holcoglossum flavescens</i>  | HQ404446 |
| Monocotyledons | Orchidaceae | <i>Holcoglossum</i> | <i>Holcoglossum lingulatum</i>  | HQ404453 |
| Monocotyledons | Orchidaceae | <i>Holcoglossum</i> | <i>Holcoglossum lingulatum</i>  | HQ404454 |
| Monocotyledons | Orchidaceae | <i>Holcoglossum</i> | <i>Holcoglossum lingulatum</i>  | HQ404455 |
| Monocotyledons | Orchidaceae | <i>Holcoglossum</i> | <i>Holcoglossum nujiangense</i> | HQ404456 |
| Monocotyledons | Orchidaceae | <i>Holcoglossum</i> | <i>Holcoglossum nujiangense</i> | HQ404457 |
| Monocotyledons | Orchidaceae | <i>Holcoglossum</i> | <i>Holcoglossum nujiangense</i> | HQ404458 |
| Monocotyledons | Orchidaceae | <i>Holcoglossum</i> | <i>Holcoglossum nujiangense</i> | HQ404459 |
| Monocotyledons | Orchidaceae | <i>Holcoglossum</i> | <i>Holcoglossum nujiangense</i> | HQ404460 |
| Monocotyledons | Orchidaceae | <i>Holcoglossum</i> | <i>Holcoglossum rupestre</i>    | HQ404467 |
| Monocotyledons | Orchidaceae | <i>Holcoglossum</i> | <i>Holcoglossum rupestre</i>    | HQ404468 |
| Monocotyledons | Orchidaceae | <i>Holcoglossum</i> | <i>Holcoglossum rupestre</i>    | HQ404469 |
| Monocotyledons | Orchidaceae | <i>Holcoglossum</i> | <i>Holcoglossum rupestre</i>    | HQ404470 |
| Monocotyledons | Orchidaceae | <i>Holcoglossum</i> | <i>Holcoglossum rupestre</i>    | HQ404471 |
| Monocotyledons | Orchidaceae | <i>Holcoglossum</i> | <i>Holcoglossum sinicum</i>     | HQ404472 |
| Monocotyledons | Orchidaceae | <i>Holcoglossum</i> | <i>Holcoglossum sinicum</i>     | HQ404473 |
| Monocotyledons | Orchidaceae | <i>Holcoglossum</i> | <i>Holcoglossum sinicum</i>     | HQ404474 |
| Monocotyledons | Orchidaceae | <i>Holcoglossum</i> | <i>Holcoglossum sinicum</i>     | HQ404475 |
| Monocotyledons | Orchidaceae | <i>Holcoglossum</i> | <i>Holcoglossum sinicum</i>     | HQ404476 |
| Monocotyledons | Orchidaceae | <i>Holcoglossum</i> | <i>Holcoglossum weixiense</i>   | HQ404483 |
| Monocotyledons | Orchidaceae | <i>Holcoglossum</i> | <i>Holcoglossum weixiense</i>   | HQ404484 |
| Monocotyledons | Orchidaceae | <i>Holcoglossum</i> | <i>Holcoglossum weixiense</i>   | HQ404485 |
| Monocotyledons | Orchidaceae | <i>Holcoglossum</i> | <i>Holcoglossum weixiense</i>   | HQ404486 |
| Monocotyledons | Orchidaceae | <i>Holcoglossum</i> | <i>Holcoglossum weixiense</i>   | HQ404487 |
| Monocotyledons | Iridaceae   | <i>Iris</i>         | <i>Iris vorobievii</i>          | FM253702 |
| Monocotyledons | Iridaceae   | <i>Iris</i>         | <i>Iris vorobievii</i>          | FM253703 |
| Monocotyledons | Iridaceae   | <i>Iris</i>         | <i>Iris vorobievii</i>          | FM253704 |
| Monocotyledons | Iridaceae   | <i>Iris</i>         | <i>Iris vorobievii</i>          | FM253705 |
| Monocotyledons | Iridaceae   | <i>Iris</i>         | <i>Iris vorobievii</i>          | FM253706 |
| Monocotyledons | Iridaceae   | <i>Iris</i>         | <i>Iris vorobievii</i>          | FM253707 |
| Monocotyledons | Iridaceae   | <i>Iris</i>         | <i>Iris vorobievii</i>          | FM253708 |
| Monocotyledons | Iridaceae   | <i>Iris</i>         | <i>Iris vorobievii</i>          | FM253709 |
| Monocotyledons | Iridaceae   | <i>Iris</i>         | <i>Iris vorobievii</i>          | FM253710 |
| Monocotyledons | Iridaceae   | <i>Iris</i>         | <i>Iris vorobievii</i>          | FM253711 |
| Monocotyledons | Iridaceae   | <i>Iris</i>         | <i>Iris vorobievii</i>          | FM253712 |
| Monocotyledons | Iridaceae   | <i>Iris</i>         | <i>Iris vorobievii</i>          | FM253713 |
| Monocotyledons | Iridaceae   | <i>Iris</i>         | <i>Iris vorobievii</i>          | FM253714 |
| Monocotyledons | Iridaceae   | <i>Iris</i>         | <i>Iris vorobievii</i>          | FM253715 |

|                |               |                      |                                     |          |
|----------------|---------------|----------------------|-------------------------------------|----------|
| Monocotyledons | Iridaceae     | <i>Iris</i>          | <i>Iris vorobievii</i>              | FM253716 |
| Monocotyledons | Iridaceae     | <i>Iris</i>          | <i>Iris vorobievii</i>              | FM253717 |
| Monocotyledons | Iridaceae     | <i>Iris</i>          | <i>Iris vorobievii</i>              | FM253718 |
| Monocotyledons | Eriocaulaceae | <i>Paepalanthus</i>  | <i>Paepalanthus lamarckii</i>       | EU924377 |
| Monocotyledons | Eriocaulaceae | <i>Paepalanthus</i>  | <i>Paepalanthus lamarckii</i>       | HQ843070 |
| Monocotyledons | Iridaceae     | <i>Iris</i>          | <i>Iris bulleyana</i>               | JN044956 |
| Monocotyledons | Iridaceae     | <i>Iris</i>          | <i>Iris bulleyana</i>               | JN044957 |
| Monocotyledons | Iridaceae     | <i>Iris</i>          | <i>Iris bulleyana</i>               | JN044958 |
| Monocotyledons | Iridaceae     | <i>Iris</i>          | <i>Iris decora</i>                  | JN044969 |
| Monocotyledons | Iridaceae     | <i>Iris</i>          | <i>Iris decora</i>                  | JN044970 |
| Monocotyledons | Zingiberaceae | <i>Amomum</i>        | <i>Amomum longiligulare</i>         | GQ118658 |
| Monocotyledons | Zingiberaceae | <i>Amomum</i>        | <i>Amomum longiligulare</i>         | GQ464983 |
| Monocotyledons | Zingiberaceae | <i>Amomum</i>        | <i>Amomum longiligulare</i>         | GU180431 |
| Monocotyledons | Zingiberaceae | <i>Amomum</i>        | <i>Amomum krervanh</i>              | GQ118657 |
| Monocotyledons | Zingiberaceae | <i>Amomum</i>        | <i>Amomum krervanh</i>              | JN043936 |
| Monocotyledons | Zingiberaceae | <i>Amomum</i>        | <i>Amomum krervanh</i>              | JN043937 |
| Monocotyledons | Orchidaceae   | <i>Rhynchosytlis</i> | <i>Rhynchosytlis coelestis</i>      | GQ251335 |
| Monocotyledons | Orchidaceae   | <i>Rhynchosytlis</i> | <i>Rhynchosytlis coelestis</i>      | GQ251336 |
| Monocotyledons | Orchidaceae   | <i>Rhynchosytlis</i> | <i>Rhynchosytlis coelestis</i>      | GQ251337 |
| Monocotyledons | Iridaceae     | <i>Iris</i>          | <i>Iris rossii</i>                  | JN045003 |
| Monocotyledons | Iridaceae     | <i>Iris</i>          | <i>Iris rossii</i>                  | JN045004 |
| Monocotyledons | Eriocaulaceae | <i>Paepalanthus</i>  | <i>Paepalanthus sp. MJGA-2011</i>   | HQ843079 |
| Monocotyledons | Eriocaulaceae | <i>Paepalanthus</i>  | <i>Paepalanthus sp. MJGA-2011</i>   | HQ843080 |
| Monocotyledons | Eriocaulaceae | <i>Paepalanthus</i>  | <i>Paepalanthus sp. MJGA-2011</i>   | HQ843081 |
| Monocotyledons | Eriocaulaceae | <i>Paepalanthus</i>  | <i>Paepalanthus sp. MJGA-2011</i>   | HQ843082 |
| Monocotyledons | Orchidaceae   | <i>Holcoglossum</i>  | <i>Holcoglossum quasipinifolium</i> | HQ404462 |
| Monocotyledons | Orchidaceae   | <i>Holcoglossum</i>  | <i>Holcoglossum quasipinifolium</i> | HQ404463 |
| Monocotyledons | Orchidaceae   | <i>Holcoglossum</i>  | <i>Holcoglossum quasipinifolium</i> | HQ404464 |
| Monocotyledons | Orchidaceae   | <i>Holcoglossum</i>  | <i>Holcoglossum quasipinifolium</i> | HQ404465 |
| Monocotyledons | Orchidaceae   | <i>Holcoglossum</i>  | <i>Holcoglossum quasipinifolium</i> | HQ404466 |
| Monocotyledons | Iridaceae     | <i>Iris</i>          | <i>Iris anguifuga</i>               | JN044954 |
| Monocotyledons | Iridaceae     | <i>Iris</i>          | <i>Iris anguifuga</i>               | JN044955 |
| Monocotyledons | Iridaceae     | <i>Iris</i>          | <i>Iris confusa</i>                 | JN044966 |
| Monocotyledons | Iridaceae     | <i>Iris</i>          | <i>Iris confusa</i>                 | JN044967 |
| Monocotyledons | Iridaceae     | <i>Iris</i>          | <i>Iris confusa</i>                 | JN044968 |
| Monocotyledons | Iridaceae     | <i>Iris</i>          | <i>Iris goniocarpa</i>              | JN044981 |
| Monocotyledons | Iridaceae     | <i>Iris</i>          | <i>Iris goniocarpa</i>              | JN044982 |
| Monocotyledons | Iridaceae     | <i>Iris</i>          | <i>Iris speculatrix</i>             | JN045013 |
| Monocotyledons | Iridaceae     | <i>Iris</i>          | <i>Iris speculatrix</i>             | JN045014 |
| Monocotyledons | Zingiberaceae | <i>Amomum</i>        | <i>Amomum dealbatum</i>             | JN043927 |
| Monocotyledons | Zingiberaceae | <i>Amomum</i>        | <i>Amomum dealbatum</i>             | JN043928 |
| Monocotyledons | Zingiberaceae | <i>Amomum</i>        | <i>Amomum dealbatum</i>             | JN043929 |
| Monocotyledons | Zingiberaceae | <i>Amomum</i>        | <i>Amomum microcarpum</i>           | JN043947 |
| Monocotyledons | Zingiberaceae | <i>Amomum</i>        | <i>Amomum microcarpum</i>           | JN043948 |
| Monocotyledons | Zingiberaceae | <i>Amomum</i>        | <i>Amomum muricarpum</i>            | JN043949 |
| Monocotyledons | Zingiberaceae | <i>Amomum</i>        | <i>Amomum muricarpum</i>            | JN043950 |
| Monocotyledons | Zingiberaceae | <i>Amomum</i>        | <i>Amomum muricarpum</i>            | JN043951 |
| Monocotyledons | Zingiberaceae | <i>Amomum</i>        | <i>Amomum neoaurantiacum</i>        | JN043952 |
| Monocotyledons | Zingiberaceae | <i>Amomum</i>        | <i>Amomum neoaurantiacum</i>        | JN043953 |
| Monocotyledons | Zingiberaceae | <i>Amomum</i>        | <i>Amomum neoaurantiacum</i>        | JN043954 |
| Monocotyledons | Zingiberaceae | <i>Amomum</i>        | <i>Amomum repoeense</i>             | JN043966 |
| Monocotyledons | Zingiberaceae | <i>Amomum</i>        | <i>Amomum repoeense</i>             | JN043967 |
| Monocotyledons | Zingiberaceae | <i>Amomum</i>        | <i>Amomum repoeense</i>             | JN043968 |



|                |                  |                  |                              |          |
|----------------|------------------|------------------|------------------------------|----------|
| Monocotyledons | Zingiberaceae    | <i>Amomum</i>    | <i>Amomum repoeense</i>      | JN043969 |
| Monocotyledons | Zingiberaceae    | <i>Amomum</i>    | <i>Amomum verrucosum</i>     | JN043976 |
| Monocotyledons | Zingiberaceae    | <i>Amomum</i>    | <i>Amomum verrucosum</i>     | JN043977 |
| Monocotyledons | Zingiberaceae    | <i>Amomum</i>    | <i>Amomum verrucosum</i>     | JN043978 |
| Monocotyledons | Zingiberaceae    | <i>Amomum</i>    | <i>Amomum scarlatinum</i>    | JN043970 |
| Monocotyledons | Zingiberaceae    | <i>Amomum</i>    | <i>Amomum scarlatinum</i>    | JN043971 |
| Monocotyledons | Xanthorrhoeaceae | <i>Haworthia</i> | <i>Haworthia mucronata</i>   | HQ646870 |
| Monocotyledons | Xanthorrhoeaceae | <i>Haworthia</i> | <i>Haworthia mucronata</i>   | HQ646871 |
| Monocotyledons | Xanthorrhoeaceae | <i>Haworthia</i> | <i>Haworthia pulchella</i>   | HQ646874 |
| Monocotyledons | Xanthorrhoeaceae | <i>Haworthia</i> | <i>Haworthia pulchella</i>   | HQ646875 |
| Monocotyledons | Xanthorrhoeaceae | <i>Haworthia</i> | <i>Haworthia rossouwii</i>   | HQ646877 |
| Monocotyledons | Xanthorrhoeaceae | <i>Haworthia</i> | <i>Haworthia rossouwii</i>   | HQ646878 |
| Monocotyledons | Xanthorrhoeaceae | <i>Haworthia</i> | <i>Haworthia venosa</i>      | HQ646890 |
| Monocotyledons | Xanthorrhoeaceae | <i>Haworthia</i> | <i>Haworthia venosa</i>      | HQ646891 |
| Monocotyledons | Xanthorrhoeaceae | <i>Haworthia</i> | <i>Haworthia venosa</i>      | HQ646892 |
| Monocotyledons | Araceae          | <i>Alocasia</i>  | <i>Alocasia macrorrhizos</i> | JN406926 |
| Monocotyledons | Araceae          | <i>Alocasia</i>  | <i>Alocasia macrorrhizos</i> | JN406927 |
| Monocotyledons | Araceae          | <i>Alocasia</i>  | <i>Alocasia macrorrhizos</i> | JN406928 |
| Monocotyledons | Araceae          | <i>Alocasia</i>  | <i>Alocasia macrorrhizos</i> | JN406929 |
| Monocotyledons | Araceae          | <i>Alocasia</i>  | <i>Alocasia macrorrhizos</i> | JF828142 |
| Monocotyledons | Araceae          | <i>Colocasia</i> | <i>Colocasia esculenta</i>   | GU135448 |
| Monocotyledons | Araceae          | <i>Colocasia</i> | <i>Colocasia esculenta</i>   | JF828139 |
| Monocotyledons | Acoraceae        | <i>Acorus</i>    | <i>Acorus calamus</i>        | GQ248235 |
| Monocotyledons | Acoraceae        | <i>Acorus</i>    | <i>Acorus calamus</i>        | GQ435387 |
| Monocotyledons | Acoraceae        | <i>Acorus</i>    | <i>Acorus calamus</i>        | FJ874970 |
| Monocotyledons | Acoraceae        | <i>Acorus</i>    | <i>Acorus calamus</i>        | FJ874971 |
| Monocotyledons | Acoraceae        | <i>Acorus</i>    | <i>Acorus calamus</i>        | FJ874972 |
| Monocotyledons | Acoraceae        | <i>Acorus</i>    | <i>Acorus calamus</i>        | FJ874973 |
| Monocotyledons | Acoraceae        | <i>Acorus</i>    | <i>Acorus calamus</i>        | FJ874974 |
| Monocotyledons | Acoraceae        | <i>Acorus</i>    | <i>Acorus calamus</i>        | FJ874975 |
| Monocotyledons | Acoraceae        | <i>Acorus</i>    | <i>Acorus calamus</i>        | FJ874976 |
| Monocotyledons | Acoraceae        | <i>Acorus</i>    | <i>Acorus calamus</i>        | FJ874977 |
| Monocotyledons | Acoraceae        | <i>Acorus</i>    | <i>Acorus calamus</i>        | DQ008894 |
| Monocotyledons | Acoraceae        | <i>Acorus</i>    | <i>Acorus calamus</i>        | DQ008899 |
| Monocotyledons | Acoraceae        | <i>Acorus</i>    | <i>Acorus calamus</i>        | EU814673 |
| Monocotyledons | Acoraceae        | <i>Acorus</i>    | <i>Acorus calamus</i>        | EU814674 |
| Monocotyledons | Acoraceae        | <i>Acorus</i>    | <i>Acorus calamus</i>        | EU814675 |
| Monocotyledons | Acoraceae        | <i>Acorus</i>    | <i>Acorus calamus</i>        | EU814676 |
| Monocotyledons | Acoraceae        | <i>Acorus</i>    | <i>Acorus calamus</i>        | JF708224 |
| Monocotyledons | Araceae          | <i>Lemna</i>     | <i>Lemna gibba</i>           | GU454504 |
| Monocotyledons | Araceae          | <i>Lemna</i>     | <i>Lemna gibba</i>           | GU454505 |
| Monocotyledons | Araceae          | <i>Lemna</i>     | <i>Lemna gibba</i>           | GU454506 |
| Monocotyledons | Araceae          | <i>Lemna</i>     | <i>Lemna gibba</i>           | GU454507 |
| Monocotyledons | Araceae          | <i>Lemna</i>     | <i>Lemna gibba</i>           | GU454508 |
| Monocotyledons | Araceae          | <i>Lemna</i>     | <i>Lemna gibba</i>           | GU454509 |
| Monocotyledons | Araceae          | <i>Lemna</i>     | <i>Lemna minor</i>           | GU454511 |
| Monocotyledons | Araceae          | <i>Lemna</i>     | <i>Lemna minor</i>           | GU454512 |
| Monocotyledons | Araceae          | <i>Lemna</i>     | <i>Lemna minor</i>           | GU454513 |
| Monocotyledons | Araceae          | <i>Lemna</i>     | <i>Lemna minor</i>           | GU454514 |
| Monocotyledons | Araceae          | <i>Lemna</i>     | <i>Lemna minor</i>           | GU454515 |
| Monocotyledons | Araceae          | <i>Lemna</i>     | <i>Lemna minor</i>           | GU454516 |
| Monocotyledons | Araceae          | <i>Lemna</i>     | <i>Lemna minor</i>           | FJ395556 |
| Monocotyledons | Araceae          | <i>Lemna</i>     | <i>Lemna minor</i>           | GQ434996 |

|                |         |                        |                                |          |
|----------------|---------|------------------------|--------------------------------|----------|
| Monocotyledons | Poaceae | <i>Oryza</i>           | <i>Oryza rufipogon</i>         | GU575244 |
| Monocotyledons | Poaceae | <i>Oryza</i>           | <i>Oryza rufipogon</i>         | GU575248 |
| Monocotyledons | Poaceae | <i>Oryza</i>           | <i>Oryza rufipogon</i>         | GU575259 |
| Monocotyledons | Poaceae | <i>Oryza</i>           | <i>Oryza rufipogon</i>         | GU575260 |
| Monocotyledons | Poaceae | <i>Oryza</i>           | <i>Oryza sativa</i>            | GU575253 |
| Monocotyledons | Poaceae | <i>Oryza</i>           | <i>Oryza sativa</i>            | GU575271 |
| Monocotyledons | Poaceae | <i>Oryza</i>           | <i>Oryza sativa</i>            | GU575284 |
| Monocotyledons | Poaceae | <i>Oryza</i>           | <i>Oryza sativa</i>            | GQ435008 |
| Monocotyledons | Poaceae | <i>Panicum</i>         | <i>Panicum miliaceum</i>       | HQ596781 |
| Monocotyledons | Poaceae | <i>Panicum</i>         | <i>Panicum miliaceum</i>       | FR667854 |
| Monocotyledons | Poaceae | <i>Poa</i>             | <i>Poa pratensis</i>           | FJ395514 |
| Monocotyledons | Poaceae | <i>Poa</i>             | <i>Poa pratensis</i>           | HQ596794 |
| Monocotyledons | Poaceae | <i>Poa</i>             | <i>Poa pratensis</i>           | FJ766223 |
| Monocotyledons | Poaceae | <i>Bambusa</i>         | <i>Bambusa multiplex</i>       | GU390999 |
| Monocotyledons | Poaceae | <i>Bambusa</i>         | <i>Bambusa multiplex</i>       | GU063085 |
| Monocotyledons | Poaceae | <i>Thinopyrum</i>      | <i>Thinopyrum bessarabicum</i> | HQ221789 |
| Monocotyledons | Poaceae | <i>Thinopyrum</i>      | <i>Thinopyrum bessarabicum</i> | HQ221813 |
| Monocotyledons | Poaceae | <i>Thinopyrum</i>      | <i>Thinopyrum bessarabicum</i> | HQ652840 |
| Monocotyledons | Poaceae | <i>Pseudoroegneria</i> | <i>Pseudoroegneria spicata</i> | HQ221770 |
| Monocotyledons | Poaceae | <i>Pseudoroegneria</i> | <i>Pseudoroegneria spicata</i> | HQ652795 |
| Monocotyledons | Araceae | <i>Spirodela</i>       | <i>Spirodela polyrhiza</i>     | GU454487 |
| Monocotyledons | Araceae | <i>Spirodela</i>       | <i>Spirodela polyrhiza</i>     | GU454488 |
| Monocotyledons | Araceae | <i>Spirodela</i>       | <i>Spirodela polyrhiza</i>     | GU454489 |
| Monocotyledons | Araceae | <i>Spirodela</i>       | <i>Spirodela polyrhiza</i>     | GU454490 |
| Monocotyledons | Araceae | <i>Spirodela</i>       | <i>Spirodela polyrhiza</i>     | GU454491 |
| Monocotyledons | Araceae | <i>Spirodela</i>       | <i>Spirodela polyrhiza</i>     | GU454492 |
| Monocotyledons | Araceae | <i>Spirodela</i>       | <i>Spirodela polyrhiza</i>     | GU454493 |
| Monocotyledons | Poaceae | <i>Cenchrus</i>        | <i>Cenchrus ciliaris</i>       | HQ876941 |
| Monocotyledons | Poaceae | <i>Cenchrus</i>        | <i>Cenchrus ciliaris</i>       | HQ876942 |
| Monocotyledons | Poaceae | <i>Glyceria</i>        | <i>Glyceria borealis</i>       | DQ665463 |
| Monocotyledons | Poaceae | <i>Glyceria</i>        | <i>Glyceria borealis</i>       | DQ665464 |
| Monocotyledons | Poaceae | <i>Glyceria</i>        | <i>Glyceria borealis</i>       | DQ665465 |
| Monocotyledons | Poaceae | <i>Glyceria</i>        | <i>Glyceria borealis</i>       | DQ665466 |
| Monocotyledons | Poaceae | <i>Glyceria</i>        | <i>Glyceria borealis</i>       | DQ665467 |
| Monocotyledons | Poaceae | <i>Glyceria</i>        | <i>Glyceria borealis</i>       | DQ665468 |
| Monocotyledons | Poaceae | <i>Glyceria</i>        | <i>Glyceria borealis</i>       | DQ665469 |
| Monocotyledons | Poaceae | <i>Glyceria</i>        | <i>Glyceria borealis</i>       | DQ665470 |
| Monocotyledons | Poaceae | <i>Glyceria</i>        | <i>Glyceria striata</i>        | DQ665535 |
| Monocotyledons | Poaceae | <i>Glyceria</i>        | <i>Glyceria striata</i>        | DQ665536 |
| Monocotyledons | Poaceae | <i>Glyceria</i>        | <i>Glyceria striata</i>        | DQ665537 |
| Monocotyledons | Poaceae | <i>Glyceria</i>        | <i>Glyceria striata</i>        | DQ665538 |
| Monocotyledons | Poaceae | <i>Glyceria</i>        | <i>Glyceria striata</i>        | DQ665539 |
| Monocotyledons | Poaceae | <i>Glyceria</i>        | <i>Glyceria striata</i>        | DQ665540 |
| Monocotyledons | Poaceae | <i>Glyceria</i>        | <i>Glyceria striata</i>        | DQ665541 |
| Monocotyledons | Poaceae | <i>Glyceria</i>        | <i>Glyceria striata</i>        | DQ665542 |
| Monocotyledons | Poaceae | <i>Glyceria</i>        | <i>Glyceria striata</i>        | DQ665543 |
| Monocotyledons | Poaceae | <i>Glyceria</i>        | <i>Glyceria striata</i>        | DQ665544 |
| Monocotyledons | Poaceae | <i>Glyceria</i>        | <i>Glyceria striata</i>        | DQ665545 |
| Monocotyledons | Poaceae | <i>Glyceria</i>        | <i>Glyceria striata</i>        | DQ665546 |
| Monocotyledons | Poaceae | <i>Glyceria</i>        | <i>Glyceria striata</i>        | HQ596721 |
| Monocotyledons | Poaceae | <i>Glyceria</i>        | <i>Glyceria striata</i>        | HQ596722 |
| Monocotyledons | Poaceae | <i>Panicum</i>         | <i>Panicum virgatum</i>        | JF901575 |
| Monocotyledons | Poaceae | <i>Panicum</i>         | <i>Panicum virgatum</i>        | JF901576 |

|                |               |                    |                               |          |
|----------------|---------------|--------------------|-------------------------------|----------|
| Monocotyledons | Dioscoreaceae | <i>Tacca</i>       | <i>Tacca plantaginea</i>      | JN850592 |
| Monocotyledons | Dioscoreaceae | <i>Tacca</i>       | <i>Tacca plantaginea</i>      | JN047352 |
| Monocotyledons | Dioscoreaceae | <i>Tacca</i>       | <i>Tacca plantaginea</i>      | JN047353 |
| Monocotyledons | Dioscoreaceae | <i>Tacca</i>       | <i>Tacca plantaginea</i>      | JN047354 |
| Monocotyledons | Dioscoreaceae | <i>Tacca</i>       | <i>Tacca plantaginea</i>      | JN047355 |
| Monocotyledons | Dioscoreaceae | <i>Tacca</i>       | <i>Tacca plantaginea</i>      | JN047356 |
| Monocotyledons | Dioscoreaceae | <i>Tacca</i>       | <i>Tacca plantaginea</i>      | JN047357 |
| Monocotyledons | Dioscoreaceae | <i>Tacca</i>       | <i>Tacca plantaginea</i>      | JN047358 |
| Monocotyledons | Poaceae       | <i>Eragrostis</i>  | <i>Eragrostis cilianensis</i> | HQ876961 |
| Monocotyledons | Poaceae       | <i>Eragrostis</i>  | <i>Eragrostis cilianensis</i> | HQ876962 |
| Monocotyledons | Poaceae       | <i>Eragrostis</i>  | <i>Eragrostis cilianensis</i> | HQ876963 |
| Monocotyledons | Poaceae       | <i>Eragrostis</i>  | <i>Eragrostis cilianensis</i> | HQ876964 |
| Monocotyledons | Araceae       | <i>Spirodela</i>   | <i>Spirodela intermedia</i>   | GU454484 |
| Monocotyledons | Araceae       | <i>Spirodela</i>   | <i>Spirodela intermedia</i>   | GU454485 |
| Monocotyledons | Araceae       | <i>Spirodela</i>   | <i>Spirodela intermedia</i>   | GU454486 |
| Monocotyledons | Poaceae       | <i>Glyceria</i>    | <i>Glyceria declinata</i>     | DQ665475 |
| Monocotyledons | Poaceae       | <i>Glyceria</i>    | <i>Glyceria declinata</i>     | DQ665476 |
| Monocotyledons | Poaceae       | <i>Glyceria</i>    | <i>Glyceria declinata</i>     | DQ665477 |
| Monocotyledons | Poaceae       | <i>Glyceria</i>    | <i>Glyceria declinata</i>     | DQ665478 |
| Monocotyledons | Poaceae       | <i>Glyceria</i>    | <i>Glyceria declinata</i>     | DQ665479 |
| Monocotyledons | Poaceae       | <i>Glyceria</i>    | <i>Glyceria declinata</i>     | DQ665480 |
| Monocotyledons | Poaceae       | <i>Glyceria</i>    | <i>Glyceria declinata</i>     | DQ665481 |
| Monocotyledons | Poaceae       | <i>Glyceria</i>    | <i>Glyceria declinata</i>     | DQ665482 |
| Monocotyledons | Poaceae       | <i>Glyceria</i>    | <i>Glyceria declinata</i>     | DQ665483 |
| Monocotyledons | Poaceae       | <i>Glyceria</i>    | <i>Glyceria declinata</i>     | DQ665484 |
| Monocotyledons | Orchidaceae   | <i>Cypripedium</i> | <i>Cypripedium calceolus</i>  | GQ248281 |
| Monocotyledons | Orchidaceae   | <i>Cypripedium</i> | <i>Cypripedium calceolus</i>  | JF796982 |
| Monocotyledons | Orchidaceae   | <i>Cypripedium</i> | <i>Cypripedium flavum</i>     | JQ004986 |
| Monocotyledons | Orchidaceae   | <i>Cypripedium</i> | <i>Cypripedium flavum</i>     | JF796948 |
| Monocotyledons | Acoraceae     | <i>Acorus</i>      | <i>Acorus gramineus</i>       | GQ248236 |
| Monocotyledons | Acoraceae     | <i>Acorus</i>      | <i>Acorus gramineus</i>       | FJ874978 |
| Monocotyledons | Acoraceae     | <i>Acorus</i>      | <i>Acorus gramineus</i>       | FJ874979 |
| Monocotyledons | Acoraceae     | <i>Acorus</i>      | <i>Acorus gramineus</i>       | FJ874980 |
| Monocotyledons | Acoraceae     | <i>Acorus</i>      | <i>Acorus gramineus</i>       | FJ874981 |
| Monocotyledons | Acoraceae     | <i>Acorus</i>      | <i>Acorus gramineus</i>       | FJ874982 |
| Monocotyledons | Acoraceae     | <i>Acorus</i>      | <i>Acorus gramineus</i>       | DQ008892 |
| Monocotyledons | Acoraceae     | <i>Acorus</i>      | <i>Acorus gramineus</i>       | DQ008895 |
| Monocotyledons | Acoraceae     | <i>Acorus</i>      | <i>Acorus gramineus</i>       | DQ008898 |
| Monocotyledons | Acoraceae     | <i>Acorus</i>      | <i>Acorus gramineus</i>       | EU814677 |
| Monocotyledons | Acoraceae     | <i>Acorus</i>      | <i>Acorus gramineus</i>       | EU814679 |
| Monocotyledons | Poaceae       | <i>Bambusa</i>     | <i>Bambusa vulgaris</i>       | FJ644251 |
| Monocotyledons | Poaceae       | <i>Bambusa</i>     | <i>Bambusa vulgaris</i>       | GU063097 |
| Monocotyledons | Poaceae       | <i>Bambusa</i>     | <i>Bambusa vulgaris</i>       | EF589631 |
| Monocotyledons | Poaceae       | <i>Jarava</i>      | <i>Jarava ichu</i>            | EU489267 |
| Monocotyledons | Poaceae       | <i>Jarava</i>      | <i>Jarava ichu</i>            | EU489268 |
| Monocotyledons | Dioscoreaceae | <i>Tacca</i>       | <i>Tacca leontopetaloides</i> | JN850588 |
| Monocotyledons | Dioscoreaceae | <i>Tacca</i>       | <i>Tacca leontopetaloides</i> | JN047344 |
| Monocotyledons | Dioscoreaceae | <i>Tacca</i>       | <i>Tacca leontopetaloides</i> | JN047345 |
| Monocotyledons | Dioscoreaceae | <i>Tacca</i>       | <i>Tacca leontopetaloides</i> | JN047346 |
| Monocotyledons | Dioscoreaceae | <i>Tacca</i>       | <i>Tacca leontopetaloides</i> | JN047347 |
| Monocotyledons | Dioscoreaceae | <i>Tacca</i>       | <i>Tacca leontopetaloides</i> | JN047348 |
| Monocotyledons | Dioscoreaceae | <i>Tacca</i>       | <i>Tacca leontopetaloides</i> | JN047349 |
| Monocotyledons | Dioscoreaceae | <i>Tacca</i>       | <i>Tacca leontopetaloides</i> | JN047350 |

|                |               |                   |                               |          |
|----------------|---------------|-------------------|-------------------------------|----------|
| Monocotyledons | Dioscoreaceae | <i>Tacca</i>      | <i>Tacca leontopetaloides</i> | JN047351 |
| Monocotyledons | Poaceae       | <i>Glyceria</i>   | <i>Glyceria grandis</i>       | DQ665507 |
| Monocotyledons | Poaceae       | <i>Glyceria</i>   | <i>Glyceria grandis</i>       | DQ665508 |
| Monocotyledons | Poaceae       | <i>Glyceria</i>   | <i>Glyceria grandis</i>       | DQ665509 |
| Monocotyledons | Poaceae       | <i>Glyceria</i>   | <i>Glyceria grandis</i>       | HQ596720 |
| Monocotyledons | Dioscoreaceae | <i>Tacca</i>      | <i>Tacca chantieri</i>        | JN850585 |
| Monocotyledons | Dioscoreaceae | <i>Tacca</i>      | <i>Tacca chantieri</i>        | EF590744 |
| Monocotyledons | Dioscoreaceae | <i>Tacca</i>      | <i>Tacca chantieri</i>        | JN047324 |
| Monocotyledons | Dioscoreaceae | <i>Tacca</i>      | <i>Tacca chantieri</i>        | JN047325 |
| Monocotyledons | Dioscoreaceae | <i>Tacca</i>      | <i>Tacca chantieri</i>        | JN047326 |
| Monocotyledons | Dioscoreaceae | <i>Tacca</i>      | <i>Tacca chantieri</i>        | JN047327 |
| Monocotyledons | Dioscoreaceae | <i>Tacca</i>      | <i>Tacca chantieri</i>        | JN047328 |
| Monocotyledons | Poaceae       | <i>Thinopyrum</i> | <i>Thinopyrum intermedium</i> | HQ221771 |
| Monocotyledons | Poaceae       | <i>Thinopyrum</i> | <i>Thinopyrum intermedium</i> | HQ221772 |
| Monocotyledons | Poaceae       | <i>Thinopyrum</i> | <i>Thinopyrum intermedium</i> | HQ221773 |
| Monocotyledons | Poaceae       | <i>Thinopyrum</i> | <i>Thinopyrum intermedium</i> | HQ221774 |
| Monocotyledons | Poaceae       | <i>Thinopyrum</i> | <i>Thinopyrum intermedium</i> | HQ221775 |
| Monocotyledons | Poaceae       | <i>Thinopyrum</i> | <i>Thinopyrum intermedium</i> | HQ221776 |
| Monocotyledons | Poaceae       | <i>Thinopyrum</i> | <i>Thinopyrum intermedium</i> | HQ221777 |
| Monocotyledons | Poaceae       | <i>Thinopyrum</i> | <i>Thinopyrum intermedium</i> | HQ221778 |
| Monocotyledons | Poaceae       | <i>Thinopyrum</i> | <i>Thinopyrum intermedium</i> | HQ221779 |
| Monocotyledons | Poaceae       | <i>Thinopyrum</i> | <i>Thinopyrum intermedium</i> | HQ221780 |
| Monocotyledons | Poaceae       | <i>Thinopyrum</i> | <i>Thinopyrum intermedium</i> | HQ221781 |
| Monocotyledons | Poaceae       | <i>Thinopyrum</i> | <i>Thinopyrum intermedium</i> | HQ221782 |
| Monocotyledons | Poaceae       | <i>Thinopyrum</i> | <i>Thinopyrum intermedium</i> | HQ221783 |
| Monocotyledons | Poaceae       | <i>Thinopyrum</i> | <i>Thinopyrum intermedium</i> | HQ221784 |
| Monocotyledons | Poaceae       | <i>Thinopyrum</i> | <i>Thinopyrum intermedium</i> | HQ221785 |
| Monocotyledons | Poaceae       | <i>Thinopyrum</i> | <i>Thinopyrum intermedium</i> | HQ221786 |
| Monocotyledons | Poaceae       | <i>Thinopyrum</i> | <i>Thinopyrum intermedium</i> | HQ221787 |
| Monocotyledons | Poaceae       | <i>Thinopyrum</i> | <i>Thinopyrum intermedium</i> | HQ221788 |
| Monocotyledons | Poaceae       | <i>Thinopyrum</i> | <i>Thinopyrum intermedium</i> | HQ221790 |
| Monocotyledons | Poaceae       | <i>Thinopyrum</i> | <i>Thinopyrum intermedium</i> | HQ221792 |
| Monocotyledons | Poaceae       | <i>Thinopyrum</i> | <i>Thinopyrum intermedium</i> | HQ221793 |
| Monocotyledons | Poaceae       | <i>Thinopyrum</i> | <i>Thinopyrum intermedium</i> | HQ221794 |
| Monocotyledons | Poaceae       | <i>Thinopyrum</i> | <i>Thinopyrum intermedium</i> | HQ221795 |
| Monocotyledons | Poaceae       | <i>Thinopyrum</i> | <i>Thinopyrum intermedium</i> | HQ221796 |
| Monocotyledons | Poaceae       | <i>Thinopyrum</i> | <i>Thinopyrum intermedium</i> | HQ221797 |
| Monocotyledons | Poaceae       | <i>Thinopyrum</i> | <i>Thinopyrum intermedium</i> | HQ221798 |
| Monocotyledons | Poaceae       | <i>Thinopyrum</i> | <i>Thinopyrum intermedium</i> | HQ221799 |
| Monocotyledons | Poaceae       | <i>Thinopyrum</i> | <i>Thinopyrum intermedium</i> | HQ221800 |
| Monocotyledons | Poaceae       | <i>Thinopyrum</i> | <i>Thinopyrum intermedium</i> | HQ221801 |
| Monocotyledons | Poaceae       | <i>Thinopyrum</i> | <i>Thinopyrum intermedium</i> | HQ221802 |
| Monocotyledons | Poaceae       | <i>Thinopyrum</i> | <i>Thinopyrum intermedium</i> | HQ221803 |
| Monocotyledons | Poaceae       | <i>Thinopyrum</i> | <i>Thinopyrum intermedium</i> | HQ221804 |
| Monocotyledons | Poaceae       | <i>Thinopyrum</i> | <i>Thinopyrum intermedium</i> | HQ221805 |
| Monocotyledons | Poaceae       | <i>Thinopyrum</i> | <i>Thinopyrum intermedium</i> | HQ221806 |
| Monocotyledons | Poaceae       | <i>Poa</i>        | <i>Poa annua</i>              | HQ596792 |
| Monocotyledons | Poaceae       | <i>Poa</i>        | <i>Poa annua</i>              | HQ596793 |
| Monocotyledons | Poaceae       | <i>Poa</i>        | <i>Poa annua</i>              | FJ493300 |
| Monocotyledons | Poaceae       | <i>Poa</i>        | <i>Poa annua</i>              | EU750479 |
| Monocotyledons | Poaceae       | <i>Poa</i>        | <i>Poa annua</i>              | EU750480 |
| Monocotyledons | Orchidaceae   | <i>Dendrobium</i> | <i>Dendrobium nobile</i>      | FJ216469 |
| Monocotyledons | Orchidaceae   | <i>Dendrobium</i> | <i>Dendrobium nobile</i>      | FJ216482 |

|                |             |                        |                                  |          |
|----------------|-------------|------------------------|----------------------------------|----------|
| Monocotyledons | Orchidaceae | <i>Dendrobium</i>      | <i>Dendrobium nobile</i>         | GQ248287 |
| Monocotyledons | Orchidaceae | <i>Dendrobium</i>      | <i>Dendrobium nobile</i>         | EU672797 |
| Monocotyledons | Orchidaceae | <i>Dendrobium</i>      | <i>Dendrobium nobile</i>         | EF590687 |
| Monocotyledons | Orchidaceae | <i>Dendrobium</i>      | <i>Dendrobium nobile</i>         | EU887941 |
| Monocotyledons | Orchidaceae | <i>Dendrobium</i>      | <i>Dendrobium nobile</i>         | EU887942 |
| Monocotyledons | Orchidaceae | <i>Dendrobium</i>      | <i>Dendrobium fimbriatum</i>     | FJ216468 |
| Monocotyledons | Orchidaceae | <i>Dendrobium</i>      | <i>Dendrobium fimbriatum</i>     | EU672798 |
| Monocotyledons | Orchidaceae | <i>Dendrobium</i>      | <i>Dendrobium loddigesii</i>     | EU881986 |
| Monocotyledons | Orchidaceae | <i>Dendrobium</i>      | <i>Dendrobium loddigesii</i>     | EU887940 |
| Monocotyledons | Orchidaceae | <i>Dendrobium</i>      | <i>Dendrobium thyrsiflorum</i>   | EU672799 |
| Monocotyledons | Orchidaceae | <i>Dendrobium</i>      | <i>Dendrobium thyrsiflorum</i>   | EU887929 |
| Monocotyledons | Poaceae     | <i>Nassella</i>        | <i>Nassella tenuis</i>           | EU204723 |
| Monocotyledons | Poaceae     | <i>Nassella</i>        | <i>Nassella tenuis</i>           | EU204724 |
| Monocotyledons | Orchidaceae | <i>Cattleya</i>        | <i>Cattleya aclandiae</i>        | GQ248259 |
| Monocotyledons | Orchidaceae | <i>Cattleya</i>        | <i>Cattleya aclandiae</i>        | EU140023 |
| Monocotyledons | Orchidaceae | <i>Cattleya</i>        | <i>Cattleya labiata</i>          | EU140040 |
| Monocotyledons | Orchidaceae | <i>Cattleya</i>        | <i>Cattleya labiata</i>          | EU140041 |
| Monocotyledons | Acoraceae   | <i>Acorus</i>          | <i>Acorus tatarinowii</i>        | GQ435343 |
| Monocotyledons | Acoraceae   | <i>Acorus</i>          | <i>Acorus tatarinowii</i>        | GQ435344 |
| Monocotyledons | Acoraceae   | <i>Acorus</i>          | <i>Acorus tatarinowii</i>        | GQ435345 |
| Monocotyledons | Acoraceae   | <i>Acorus</i>          | <i>Acorus tatarinowii</i>        | FJ874983 |
| Monocotyledons | Acoraceae   | <i>Acorus</i>          | <i>Acorus tatarinowii</i>        | FJ874984 |
| Monocotyledons | Acoraceae   | <i>Acorus</i>          | <i>Acorus tatarinowii</i>        | FJ874985 |
| Monocotyledons | Acoraceae   | <i>Acorus</i>          | <i>Acorus tatarinowii</i>        | DQ008890 |
| Monocotyledons | Acoraceae   | <i>Acorus</i>          | <i>Acorus tatarinowii</i>        | DQ008891 |
| Monocotyledons | Acoraceae   | <i>Acorus</i>          | <i>Acorus tatarinowii</i>        | DQ008897 |
| Monocotyledons | Acoraceae   | <i>Acorus</i>          | <i>Acorus tatarinowii</i>        | EU814678 |
| Monocotyledons | Poaceae     | <i>Pseudoroegneria</i> | <i>Pseudoroegneria strigosa</i>  | HQ221768 |
| Monocotyledons | Poaceae     | <i>Pseudoroegneria</i> | <i>Pseudoroegneria strigosa</i>  | HQ652797 |
| Monocotyledons | Orchidaceae | <i>Oncidium</i>        | <i>Oncidium hybrid cultivar</i>  | GU136268 |
| Monocotyledons | Orchidaceae | <i>Oncidium</i>        | <i>Oncidium hybrid cultivar</i>  | GU136276 |
| Monocotyledons | Orchidaceae | <i>Oncidium</i>        | <i>Oncidium hybrid cultivar</i>  | GU136284 |
| Monocotyledons | Orchidaceae | <i>Oncidium</i>        | <i>Oncidium hybrid cultivar</i>  | GU175343 |
| Monocotyledons | Orchidaceae | <i>Oncidium</i>        | <i>Oncidium hybrid cultivar</i>  | GU175351 |
| Monocotyledons | Orchidaceae | <i>Cattleya</i>        | <i>Cattleya bicolor</i>          | EU140026 |
| Monocotyledons | Orchidaceae | <i>Cattleya</i>        | <i>Cattleya bicolor</i>          | EU140027 |
| Monocotyledons | Orchidaceae | <i>Cattleya</i>        | <i>Cattleya nobilior</i>         | GQ248260 |
| Monocotyledons | Orchidaceae | <i>Cattleya</i>        | <i>Cattleya nobilior</i>         | EU140047 |
| Monocotyledons | Orchidaceae | <i>Encyclia</i>        | <i>Encyclia cordigera</i>        | EU213732 |
| Monocotyledons | Orchidaceae | <i>Encyclia</i>        | <i>Encyclia cordigera</i>        | EU213733 |
| Monocotyledons | Orchidaceae | <i>Encyclia</i>        | <i>Encyclia cordigera</i>        | EU213734 |
| Monocotyledons | Orchidaceae | <i>Encyclia</i>        | <i>Encyclia cordigera</i>        | EU213735 |
| Monocotyledons | Orchidaceae | <i>Dendrobium</i>      | <i>Dendrobium devonianum</i>     | FJ216478 |
| Monocotyledons | Orchidaceae | <i>Dendrobium</i>      | <i>Dendrobium devonianum</i>     | GQ162802 |
| Monocotyledons | Orchidaceae | <i>Dendrobium</i>      | <i>Dendrobium gratiosissimum</i> | FJ216472 |
| Monocotyledons | Orchidaceae | <i>Dendrobium</i>      | <i>Dendrobium gratiosissimum</i> | GQ153536 |
| Monocotyledons | Orchidaceae | <i>Dendrobium</i>      | <i>Dendrobium moniliforme</i>    | GQ162803 |
| Monocotyledons | Orchidaceae | <i>Dendrobium</i>      | <i>Dendrobium moniliforme</i>    | EU672796 |
| Monocotyledons | Orchidaceae | <i>Dendrobium</i>      | <i>Dendrobium moniliforme</i>    | EU887938 |
| Monocotyledons | Orchidaceae | <i>Dendrobium</i>      | <i>Dendrobium officinale</i>     | FJ216479 |
| Monocotyledons | Orchidaceae | <i>Dendrobium</i>      | <i>Dendrobium officinale</i>     | GQ153537 |
| Monocotyledons | Orchidaceae | <i>Phalaenopsis</i>    | <i>Phalaenopsis amabilis</i>     | FJ460367 |
| Monocotyledons | Orchidaceae | <i>Phalaenopsis</i>    | <i>Phalaenopsis amabilis</i>     | FJ460368 |

|                |             |                     |                                  |          |
|----------------|-------------|---------------------|----------------------------------|----------|
| Monocotyledons | Orchidaceae | <i>Phalaenopsis</i> | <i>Phalaenopsis amabilis</i>     | FJ460369 |
| Monocotyledons | Orchidaceae | <i>Phalaenopsis</i> | <i>Phalaenopsis amabilis</i>     | FJ460370 |
| Monocotyledons | Orchidaceae | <i>Phalaenopsis</i> | <i>Phalaenopsis amabilis</i>     | FJ460373 |
| Monocotyledons | Orchidaceae | <i>Phalaenopsis</i> | <i>Phalaenopsis amabilis</i>     | FJ460374 |
| Monocotyledons | Orchidaceae | <i>Phalaenopsis</i> | <i>Phalaenopsis amabilis</i>     | FJ460388 |
| Monocotyledons | Orchidaceae | <i>Phalaenopsis</i> | <i>Phalaenopsis amabilis</i>     | FJ460389 |
| Monocotyledons | Orchidaceae | <i>Phalaenopsis</i> | <i>Phalaenopsis amabilis</i>     | FJ460390 |
| Monocotyledons | Orchidaceae | <i>Phalaenopsis</i> | <i>Phalaenopsis amabilis</i>     | FJ460394 |
| Monocotyledons | Orchidaceae | <i>Phalaenopsis</i> | <i>Phalaenopsis amabilis</i>     | FJ460397 |
| Monocotyledons | Orchidaceae | <i>Phalaenopsis</i> | <i>Phalaenopsis amabilis</i>     | FJ460399 |
| Monocotyledons | Orchidaceae | <i>Phalaenopsis</i> | <i>Phalaenopsis amabilis</i>     | FJ460400 |
| Monocotyledons | Orchidaceae | <i>Phalaenopsis</i> | <i>Phalaenopsis amabilis</i>     | FJ460404 |
| Monocotyledons | Poaceae     | <i>Setaria</i>      | <i>Setaria verticillata</i>      | FJ766230 |
| Monocotyledons | Poaceae     | <i>Setaria</i>      | <i>Setaria verticillata</i>      | HQ876991 |
| Monocotyledons | Orchidaceae | <i>Cypripedium</i>  | <i>Cypripedium parviflorum</i>   | HQ596661 |
| Monocotyledons | Orchidaceae | <i>Cypripedium</i>  | <i>Cypripedium parviflorum</i>   | JF796968 |
| Monocotyledons | Orchidaceae | <i>Dendrobium</i>   | <i>Dendrobium crepidatum</i>     | FJ216488 |
| Monocotyledons | Orchidaceae | <i>Dendrobium</i>   | <i>Dendrobium crepidatum</i>     | GQ162800 |
| Monocotyledons | Orchidaceae | <i>Dendrobium</i>   | <i>Dendrobium crepidatum</i>     | EU887935 |
| Monocotyledons | Orchidaceae | <i>Dendrobium</i>   | <i>Dendrobium aphyllum</i>       | FJ216486 |
| Monocotyledons | Orchidaceae | <i>Dendrobium</i>   | <i>Dendrobium aphyllum</i>       | EU887939 |
| Monocotyledons | Orchidaceae | <i>Dendrobium</i>   | <i>Dendrobium chrysanthum</i>    | GQ162805 |
| Monocotyledons | Orchidaceae | <i>Dendrobium</i>   | <i>Dendrobium chrysanthum</i>    | EU887934 |
| Monocotyledons | Orchidaceae | <i>Oncidium</i>     | <i>Oncidium harryanum</i>        | FJ564027 |
| Monocotyledons | Orchidaceae | <i>Oncidium</i>     | <i>Oncidium harryanum</i>        | FJ564165 |
| Monocotyledons | Orchidaceae | <i>Oncidium</i>     | <i>Oncidium cheiroporum</i>      | FJ564148 |
| Monocotyledons | Orchidaceae | <i>Oncidium</i>     | <i>Oncidium cheiroporum</i>      | FJ564308 |
| Monocotyledons | Orchidaceae | <i>Oncidium</i>     | <i>Oncidium ghiesbreghtianum</i> | FJ564050 |
| Monocotyledons | Orchidaceae | <i>Oncidium</i>     | <i>Oncidium ghiesbreghtianum</i> | FJ564152 |
| Monocotyledons | Orchidaceae | <i>Oncidium</i>     | <i>Oncidium ghiesbreghtianum</i> | FJ564657 |
| Monocotyledons | Orchidaceae | <i>Oncidium</i>     | <i>Oncidium reichenheimii</i>    | FJ564013 |
| Monocotyledons | Orchidaceae | <i>Oncidium</i>     | <i>Oncidium reichenheimii</i>    | FJ564175 |
| Monocotyledons | Orchidaceae | <i>Oncidium</i>     | <i>Oncidium leucochilum</i>      | FJ564012 |
| Monocotyledons | Orchidaceae | <i>Oncidium</i>     | <i>Oncidium leucochilum</i>      | FJ564635 |
| Monocotyledons | Orchidaceae | <i>Oncidium</i>     | <i>Oncidium poikilostalix</i>    | FJ564029 |
| Monocotyledons | Orchidaceae | <i>Oncidium</i>     | <i>Oncidium poikilostalix</i>    | FJ564660 |
| Monocotyledons | Poaceae     | <i>Cenchrus</i>     | <i>Cenchrus purpureus</i>        | GU135321 |
| Monocotyledons | Poaceae     | <i>Cenchrus</i>     | <i>Cenchrus purpureus</i>        | GU135404 |
| Monocotyledons | Orchidaceae | <i>Oncidium</i>     | <i>Oncidium vulcanicum</i>       | FJ564153 |
| Monocotyledons | Orchidaceae | <i>Oncidium</i>     | <i>Oncidium vulcanicum</i>       | FJ564248 |
| Monocotyledons | Orchidaceae | <i>Oncidium</i>     | <i>Oncidium aureum</i>           | FJ564096 |
| Monocotyledons | Orchidaceae | <i>Oncidium</i>     | <i>Oncidium aureum</i>           | FJ564562 |
| Monocotyledons | Orchidaceae | <i>Oncidium</i>     | <i>Oncidium armatum</i>          | FJ564169 |
| Monocotyledons | Orchidaceae | <i>Oncidium</i>     | <i>Oncidium armatum</i>          | FJ564193 |
| Monocotyledons | Orchidaceae | <i>Oncidium</i>     | <i>Oncidium aspidorhinum</i>     | FJ564203 |
| Monocotyledons | Orchidaceae | <i>Oncidium</i>     | <i>Oncidium aspidorhinum</i>     | FJ564256 |
| Monocotyledons | Orchidaceae | <i>Oncidium</i>     | <i>Oncidium cirrhosum</i>        | FJ564032 |
| Monocotyledons | Orchidaceae | <i>Oncidium</i>     | <i>Oncidium cirrhosum</i>        | FJ564180 |
| Monocotyledons | Orchidaceae | <i>Oncidium</i>     | <i>Oncidium cirrhosum</i>        | FJ564569 |
| Monocotyledons | Orchidaceae | <i>Oncidium</i>     | <i>Oncidium alexandrae</i>       | FJ564166 |
| Monocotyledons | Orchidaceae | <i>Oncidium</i>     | <i>Oncidium alexandrae</i>       | FJ564188 |
| Monocotyledons | Orchidaceae | <i>Oncidium</i>     | <i>Oncidium lehmannii</i>        | FJ564484 |
| Monocotyledons | Orchidaceae | <i>Oncidium</i>     | <i>Oncidium lehmannii</i>        | FJ564541 |

|                |             |                 |                                |          |
|----------------|-------------|-----------------|--------------------------------|----------|
| Monocotyledons | Orchidaceae | <i>Oncidium</i> | <i>Oncidium epidendroides</i>  | FJ564173 |
| Monocotyledons | Orchidaceae | <i>Oncidium</i> | <i>Oncidium epidendroides</i>  | FJ564201 |
| Monocotyledons | Orchidaceae | <i>Oncidium</i> | <i>Oncidium epidendroides</i>  | FJ564241 |
| Monocotyledons | Orchidaceae | <i>Oncidium</i> | <i>Oncidium epidendroides</i>  | FJ564488 |
| Monocotyledons | Orchidaceae | <i>Oncidium</i> | <i>Oncidium hallii</i>         | FJ563973 |
| Monocotyledons | Orchidaceae | <i>Oncidium</i> | <i>Oncidium hallii</i>         | FJ564159 |
| Monocotyledons | Orchidaceae | <i>Oncidium</i> | <i>Oncidium luteopurpureum</i> | FJ564071 |
| Monocotyledons | Orchidaceae | <i>Oncidium</i> | <i>Oncidium luteopurpureum</i> | FJ564540 |
| Monocotyledons | Orchidaceae | <i>Oncidium</i> | <i>Oncidium nevadense</i>      | FJ564090 |
| Monocotyledons | Orchidaceae | <i>Oncidium</i> | <i>Oncidium nevadense</i>      | FJ564150 |
| Monocotyledons | Orchidaceae | <i>Oncidium</i> | <i>Oncidium portmannii</i>     | FJ564164 |
| Monocotyledons | Orchidaceae | <i>Oncidium</i> | <i>Oncidium portmannii</i>     | FJ564172 |
| Monocotyledons | Orchidaceae | <i>Oncidium</i> | <i>Oncidium portmannii</i>     | FJ564490 |
| Monocotyledons | Orchidaceae | <i>Oncidium</i> | <i>Oncidium tenuoides</i>      | FJ564192 |
| Monocotyledons | Orchidaceae | <i>Oncidium</i> | <i>Oncidium tenuoides</i>      | FJ564531 |
| Monocotyledons | Orchidaceae | <i>Oncidium</i> | <i>Oncidium baueri</i>         | FJ564224 |
| Monocotyledons | Orchidaceae | <i>Oncidium</i> | <i>Oncidium baueri</i>         | FJ564534 |
| Monocotyledons | Orchidaceae | <i>Oncidium</i> | <i>Oncidium chrysomorphum</i>  | FJ564189 |
| Monocotyledons | Orchidaceae | <i>Oncidium</i> | <i>Oncidium chrysomorphum</i>  | FJ564513 |
| Monocotyledons | Orchidaceae | <i>Oncidium</i> | <i>Oncidium endocharis</i>     | FJ564088 |
| Monocotyledons | Orchidaceae | <i>Oncidium</i> | <i>Oncidium endocharis</i>     | FJ564369 |
| Monocotyledons | Orchidaceae | <i>Oncidium</i> | <i>Oncidium fuscatum</i>       | FJ564038 |
| Monocotyledons | Orchidaceae | <i>Oncidium</i> | <i>Oncidium fuscatum</i>       | FJ564227 |
| Monocotyledons | Orchidaceae | <i>Oncidium</i> | <i>Oncidium heteranthum</i>    | FJ564537 |
| Monocotyledons | Orchidaceae | <i>Oncidium</i> | <i>Oncidium heteranthum</i>    | FJ564618 |
| Monocotyledons | Orchidaceae | <i>Oncidium</i> | <i>Oncidium incurvum</i>       | FJ564437 |
| Monocotyledons | Orchidaceae | <i>Oncidium</i> | <i>Oncidium incurvum</i>       | FJ564630 |
| Monocotyledons | Orchidaceae | <i>Oncidium</i> | <i>Oncidium isthmi</i>         | FJ564221 |
| Monocotyledons | Orchidaceae | <i>Oncidium</i> | <i>Oncidium isthmi</i>         | FJ564543 |
| Monocotyledons | Orchidaceae | <i>Oncidium</i> | <i>Oncidium retusum</i>        | FJ564005 |
| Monocotyledons | Orchidaceae | <i>Oncidium</i> | <i>Oncidium retusum</i>        | FJ564215 |
| Monocotyledons | Orchidaceae | <i>Oncidium</i> | <i>Oncidium retusum</i>        | FJ564578 |
| Monocotyledons | Orchidaceae | <i>Oncidium</i> | <i>Oncidium retusum</i>        | FJ564580 |
| Monocotyledons | Orchidaceae | <i>Oncidium</i> | <i>Oncidium gramineum</i>      | FJ564238 |
| Monocotyledons | Orchidaceae | <i>Oncidium</i> | <i>Oncidium gramineum</i>      | FJ564500 |
| Monocotyledons | Orchidaceae | <i>Oncidium</i> | <i>Oncidium gramineum</i>      | FJ564617 |
| Monocotyledons | Orchidaceae | <i>Oncidium</i> | <i>Oncidium tigroides</i>      | FJ564548 |
| Monocotyledons | Orchidaceae | <i>Oncidium</i> | <i>Oncidium tigroides</i>      | FJ564570 |
| Monocotyledons | Araceae     | <i>Lemna</i>    | <i>Lemna aequinoctialis</i>    | GU454500 |
| Monocotyledons | Araceae     | <i>Lemna</i>    | <i>Lemna aequinoctialis</i>    | GU454501 |
| Monocotyledons | Araceae     | <i>Lemna</i>    | <i>Lemna aequinoctialis</i>    | GU454502 |
| Monocotyledons | Araceae     | <i>Lemna</i>    | <i>Lemna minuta</i>            | GU454517 |
| Monocotyledons | Araceae     | <i>Lemna</i>    | <i>Lemna minuta</i>            | GU454518 |
| Monocotyledons | Araceae     | <i>Lemna</i>    | <i>Lemna minuta</i>            | GU454519 |
| Monocotyledons | Araceae     | <i>Lemna</i>    | <i>Lemna minuta</i>            | GU454527 |
| Monocotyledons | Araceae     | <i>Lemna</i>    | <i>Lemna trisulca</i>          | GU454521 |
| Monocotyledons | Araceae     | <i>Lemna</i>    | <i>Lemna trisulca</i>          | GU454522 |
| Monocotyledons | Araceae     | <i>Lemna</i>    | <i>Lemna trisulca</i>          | GU454523 |
| Monocotyledons | Araceae     | <i>Lemna</i>    | <i>Lemna turionifera</i>       | GU454524 |
| Monocotyledons | Araceae     | <i>Lemna</i>    | <i>Lemna turionifera</i>       | GU454525 |
| Monocotyledons | Araceae     | <i>Lemna</i>    | <i>Lemna valdiviana</i>        | GU454526 |
| Monocotyledons | Araceae     | <i>Lemna</i>    | <i>Lemna valdiviana</i>        | GU454528 |
| Monocotyledons | Araceae     | <i>Lemna</i>    | <i>Lemna valdiviana</i>        | GU454529 |

|                |               |                     |                                |          |
|----------------|---------------|---------------------|--------------------------------|----------|
| Monocotyledons | Orchidaceae   | <i>Dendrobium</i>   | <i>Dendrobium chrysotoxum</i>  | EU672792 |
| Monocotyledons | Orchidaceae   | <i>Dendrobium</i>   | <i>Dendrobium chrysotoxum</i>  | EU887923 |
| Monocotyledons | Orchidaceae   | <i>Dendrobium</i>   | <i>Dendrobium chrysotoxum</i>  | EU887924 |
| Monocotyledons | Orchidaceae   | <i>Dendrobium</i>   | <i>Dendrobium chrysotoxum</i>  | EU887925 |
| Monocotyledons | Orchidaceae   | <i>Dendrobium</i>   | <i>Dendrobium densiflorum</i>  | FJ216480 |
| Monocotyledons | Orchidaceae   | <i>Dendrobium</i>   | <i>Dendrobium densiflorum</i>  | FJ216487 |
| Monocotyledons | Orchidaceae   | <i>Dendrobium</i>   | <i>Dendrobium lindleyi</i>     | GQ248286 |
| Monocotyledons | Orchidaceae   | <i>Dendrobium</i>   | <i>Dendrobium lindleyi</i>     | EF590688 |
| Monocotyledons | Orchidaceae   | <i>Dendrobium</i>   | <i>Dendrobium williamsonii</i> | EU672795 |
| Monocotyledons | Orchidaceae   | <i>Dendrobium</i>   | <i>Dendrobium williamsonii</i> | EU887927 |
| Monocotyledons | Poaceae       | <i>Eragrostis</i>   | <i>Eragrostis tenuifolia</i>   | GQ248300 |
| Monocotyledons | Poaceae       | <i>Eragrostis</i>   | <i>Eragrostis tenuifolia</i>   | HQ876971 |
| Monocotyledons | Poaceae       | <i>Eragrostis</i>   | <i>Eragrostis tenuifolia</i>   | HQ876972 |
| Monocotyledons | Dioscoreaceae | <i>Tacca</i>        | <i>Tacca integrifolia</i>      | JN850586 |
| Monocotyledons | Dioscoreaceae | <i>Tacca</i>        | <i>Tacca integrifolia</i>      | JN850587 |
| Monocotyledons | Dioscoreaceae | <i>Tacca</i>        | <i>Tacca integrifolia</i>      | EF590745 |
| Monocotyledons | Dioscoreaceae | <i>Tacca</i>        | <i>Tacca integrifolia</i>      | JN047329 |
| Monocotyledons | Dioscoreaceae | <i>Tacca</i>        | <i>Tacca integrifolia</i>      | JN047330 |
| Monocotyledons | Dioscoreaceae | <i>Tacca</i>        | <i>Tacca integrifolia</i>      | JN047331 |
| Monocotyledons | Dioscoreaceae | <i>Tacca</i>        | <i>Tacca integrifolia</i>      | JN047332 |
| Monocotyledons | Dioscoreaceae | <i>Tacca</i>        | <i>Tacca integrifolia</i>      | JN047333 |
| Monocotyledons | Dioscoreaceae | <i>Tacca</i>        | <i>Tacca integrifolia</i>      | JN047334 |
| Monocotyledons | Dioscoreaceae | <i>Tacca</i>        | <i>Tacca integrifolia</i>      | JN047335 |
| Monocotyledons | Dioscoreaceae | <i>Tacca</i>        | <i>Tacca integrifolia</i>      | JN047336 |
| Monocotyledons | Dioscoreaceae | <i>Tacca</i>        | <i>Tacca integrifolia</i>      | JN047337 |
| Monocotyledons | Dioscoreaceae | <i>Tacca</i>        | <i>Tacca integrifolia</i>      | JN047338 |
| Monocotyledons | Dioscoreaceae | <i>Tacca</i>        | <i>Tacca integrifolia</i>      | JN047339 |
| Monocotyledons | Dioscoreaceae | <i>Tacca</i>        | <i>Tacca integrifolia</i>      | JN047340 |
| Monocotyledons | Dioscoreaceae | <i>Tacca</i>        | <i>Tacca integrifolia</i>      | JN047341 |
| Monocotyledons | Dioscoreaceae | <i>Tacca</i>        | <i>Tacca integrifolia</i>      | JN047342 |
| Monocotyledons | Dioscoreaceae | <i>Tacca</i>        | <i>Tacca integrifolia</i>      | JN047343 |
| Monocotyledons | Orchidaceae   | <i>Dendrobium</i>   | <i>Dendrobium primulinum</i>   | GQ153535 |
| Monocotyledons | Orchidaceae   | <i>Dendrobium</i>   | <i>Dendrobium primulinum</i>   | EU887936 |
| Monocotyledons | Orchidaceae   | <i>Dendrobium</i>   | <i>Dendrobium primulinum</i>   | EU887937 |
| Monocotyledons | Orchidaceae   | <i>Dendrobium</i>   | <i>Dendrobium wardianum</i>    | GQ162801 |
| Monocotyledons | Orchidaceae   | <i>Dendrobium</i>   | <i>Dendrobium wardianum</i>    | EU887930 |
| Monocotyledons | Orchidaceae   | <i>Dendrobium</i>   | <i>Dendrobium wardianum</i>    | EU887931 |
| Monocotyledons | Araceae       | <i>Alocasia</i>     | <i>Alocasia odora</i>          | DQ786512 |
| Monocotyledons | Araceae       | <i>Alocasia</i>     | <i>Alocasia odora</i>          | JF828144 |
| Monocotyledons | Orchidaceae   | <i>Dendrobium</i>   | <i>Dendrobium hancockii</i>    | FJ216481 |
| Monocotyledons | Orchidaceae   | <i>Dendrobium</i>   | <i>Dendrobium hancockii</i>    | EU672800 |
| Monocotyledons | Poaceae       | <i>Nassella</i>     | <i>Nassella trichotoma</i>     | EU489305 |
| Monocotyledons | Poaceae       | <i>Nassella</i>     | <i>Nassella trichotoma</i>     | EU204726 |
| Monocotyledons | Poaceae       | <i>Nassella</i>     | <i>Nassella trichotoma</i>     | EU204727 |
| Monocotyledons | Poaceae       | <i>Bambusa</i>      | <i>Bambusa bambos</i>          | GU390993 |
| Monocotyledons | Poaceae       | <i>Bambusa</i>      | <i>Bambusa bambos</i>          | GU063075 |
| Monocotyledons | Poaceae       | <i>Eragrostis</i>   | <i>Eragrostis heteromera</i>   | HQ876966 |
| Monocotyledons | Poaceae       | <i>Eragrostis</i>   | <i>Eragrostis heteromera</i>   | HQ876967 |
| Monocotyledons | Orchidaceae   | <i>Phalaenopsis</i> | <i>Phalaenopsis aphrodite</i>  | FJ460375 |
| Monocotyledons | Orchidaceae   | <i>Phalaenopsis</i> | <i>Phalaenopsis aphrodite</i>  | FJ460376 |
| Monocotyledons | Orchidaceae   | <i>Phalaenopsis</i> | <i>Phalaenopsis aphrodite</i>  | FJ460377 |
| Monocotyledons | Orchidaceae   | <i>Phalaenopsis</i> | <i>Phalaenopsis aphrodite</i>  | FJ460378 |
| Monocotyledons | Orchidaceae   | <i>Phalaenopsis</i> | <i>Phalaenopsis aphrodite</i>  | FJ460379 |



|                |             |                     |                                |          |
|----------------|-------------|---------------------|--------------------------------|----------|
| Monocotyledons | Orchidaceae | <i>Phalaenopsis</i> | <i>Phalaenopsis aphrodite</i>  | FJ460384 |
| Monocotyledons | Orchidaceae | <i>Phalaenopsis</i> | <i>Phalaenopsis aphrodite</i>  | FJ460401 |
| Monocotyledons | Orchidaceae | <i>Phalaenopsis</i> | <i>Phalaenopsis aphrodite</i>  | FJ460402 |
| Monocotyledons | Orchidaceae | <i>Phalaenopsis</i> | <i>Phalaenopsis aphrodite</i>  | FJ460403 |
| Monocotyledons | Orchidaceae | <i>Phalaenopsis</i> | <i>Phalaenopsis sanderiana</i> | FJ460366 |
| Monocotyledons | Orchidaceae | <i>Phalaenopsis</i> | <i>Phalaenopsis sanderiana</i> | FJ460380 |
| Monocotyledons | Orchidaceae | <i>Phalaenopsis</i> | <i>Phalaenopsis sanderiana</i> | FJ460381 |
| Monocotyledons | Orchidaceae | <i>Bulbophyllum</i> | <i>Bulbophyllum nutans</i>     | EF200433 |
| Monocotyledons | Orchidaceae | <i>Bulbophyllum</i> | <i>Bulbophyllum nutans</i>     | EF200434 |
| Monocotyledons | Orchidaceae | <i>Bulbophyllum</i> | <i>Bulbophyllum nutans</i>     | EF200435 |
| Monocotyledons | Orchidaceae | <i>Bulbophyllum</i> | <i>Bulbophyllum nutans</i>     | EF200436 |
| Monocotyledons | Poaceae     | <i>Urochloa</i>     | <i>Urochloa dictyoneura</i>    | HQ876937 |
| Monocotyledons | Poaceae     | <i>Urochloa</i>     | <i>Urochloa dictyoneura</i>    | HQ876938 |
| Monocotyledons | Poaceae     | <i>Glyceria</i>     | <i>Glyceria fluitans</i>       | DQ665497 |
| Monocotyledons | Poaceae     | <i>Glyceria</i>     | <i>Glyceria fluitans</i>       | DQ665498 |
| Monocotyledons | Poaceae     | <i>Glyceria</i>     | <i>Glyceria fluitans</i>       | DQ665499 |
| Monocotyledons | Poaceae     | <i>Glyceria</i>     | <i>Glyceria fluitans</i>       | DQ665500 |
| Monocotyledons | Poaceae     | <i>Glyceria</i>     | <i>Glyceria fluitans</i>       | DQ665501 |
| Monocotyledons | Poaceae     | <i>Glyceria</i>     | <i>Glyceria fluitans</i>       | DQ665502 |
| Monocotyledons | Poaceae     | <i>Glyceria</i>     | <i>Glyceria fluitans</i>       | DQ665503 |
| Monocotyledons | Poaceae     | <i>Glyceria</i>     | <i>Glyceria fluitans</i>       | DQ665504 |
| Monocotyledons | Poaceae     | <i>Glyceria</i>     | <i>Glyceria fluitans</i>       | DQ665505 |
| Monocotyledons | Poaceae     | <i>Glyceria</i>     | <i>Glyceria fluitans</i>       | DQ665506 |
| Monocotyledons | Acoraceae   | <i>Acorus</i>       | <i>Acorus americanus</i>       | FJ874967 |
| Monocotyledons | Acoraceae   | <i>Acorus</i>       | <i>Acorus americanus</i>       | FJ874968 |
| Monocotyledons | Acoraceae   | <i>Acorus</i>       | <i>Acorus americanus</i>       | FJ874969 |
| Monocotyledons | Acoraceae   | <i>Acorus</i>       | <i>Acorus americanus</i>       | DQ008896 |
| Monocotyledons | Acoraceae   | <i>Acorus</i>       | <i>Acorus americanus</i>       | EU814671 |
| Monocotyledons | Acoraceae   | <i>Acorus</i>       | <i>Acorus americanus</i>       | EU814672 |
| Monocotyledons | Poaceae     | <i>Poa</i>          | <i>Poa compressa</i>           | EU750481 |
| Monocotyledons | Poaceae     | <i>Poa</i>          | <i>Poa compressa</i>           | EU750482 |
| Monocotyledons | Poaceae     | <i>Poa</i>          | <i>Poa compressa</i>           | EU750483 |
| Monocotyledons | Poaceae     | <i>Setaria</i>      | <i>Setaria pumila</i>          | HQ596843 |
| Monocotyledons | Poaceae     | <i>Setaria</i>      | <i>Setaria pumila</i>          | HQ876989 |
| Monocotyledons | Poaceae     | <i>Bambusa</i>      | <i>Bambusa tuldooides</i>      | GU391001 |
| Monocotyledons | Poaceae     | <i>Bambusa</i>      | <i>Bambusa tuldooides</i>      | GU063083 |
| Monocotyledons | Poaceae     | <i>Bambusa</i>      | <i>Bambusa sinospinosa</i>     | GU391000 |
| Monocotyledons | Poaceae     | <i>Bambusa</i>      | <i>Bambusa sinospinosa</i>     | GU063077 |
| Monocotyledons | Poaceae     | <i>Bambusa</i>      | <i>Bambusa blumeana</i>        | GU390994 |
| Monocotyledons | Poaceae     | <i>Bambusa</i>      | <i>Bambusa blumeana</i>        | GU063076 |
| Monocotyledons | Poaceae     | <i>Glyceria</i>     | <i>Glyceria canadensis</i>     | DQ665471 |
| Monocotyledons | Poaceae     | <i>Glyceria</i>     | <i>Glyceria canadensis</i>     | DQ665472 |
| Monocotyledons | Poaceae     | <i>Glyceria</i>     | <i>Glyceria canadensis</i>     | DQ665473 |
| Monocotyledons | Poaceae     | <i>Glyceria</i>     | <i>Glyceria canadensis</i>     | DQ665474 |
| Monocotyledons | Poaceae     | <i>Glyceria</i>     | <i>Glyceria elata</i>          | DQ665485 |
| Monocotyledons | Poaceae     | <i>Glyceria</i>     | <i>Glyceria elata</i>          | DQ665486 |
| Monocotyledons | Poaceae     | <i>Glyceria</i>     | <i>Glyceria elata</i>          | DQ665487 |
| Monocotyledons | Poaceae     | <i>Glyceria</i>     | <i>Glyceria elata</i>          | DQ665488 |
| Monocotyledons | Poaceae     | <i>Glyceria</i>     | <i>Glyceria elata</i>          | DQ665489 |
| Monocotyledons | Poaceae     | <i>Glyceria</i>     | <i>Glyceria elata</i>          | DQ665490 |
| Monocotyledons | Poaceae     | <i>Glyceria</i>     | <i>Glyceria elata</i>          | DQ665491 |
| Monocotyledons | Poaceae     | <i>Glyceria</i>     | <i>Glyceria elata</i>          | DQ665492 |
| Monocotyledons | Poaceae     | <i>Glyceria</i>     | <i>Glyceria elata</i>          | DQ665493 |

|                |             |                     |                                    |          |
|----------------|-------------|---------------------|------------------------------------|----------|
| Monocotyledons | Poaceae     | <i>Glyceria</i>     | <i>Glyceria elata</i>              | DQ665494 |
| Monocotyledons | Poaceae     | <i>Glyceria</i>     | <i>Glyceria elata</i>              | DQ665495 |
| Monocotyledons | Poaceae     | <i>Glyceria</i>     | <i>Glyceria elata</i>              | DQ665496 |
| Monocotyledons | Poaceae     | <i>Glyceria</i>     | <i>Glyceria leptostachya</i>       | DQ665510 |
| Monocotyledons | Poaceae     | <i>Glyceria</i>     | <i>Glyceria leptostachya</i>       | DQ665511 |
| Monocotyledons | Poaceae     | <i>Glyceria</i>     | <i>Glyceria leptostachya</i>       | DQ665512 |
| Monocotyledons | Poaceae     | <i>Glyceria</i>     | <i>Glyceria leptostachya</i>       | DQ665513 |
| Monocotyledons | Poaceae     | <i>Glyceria</i>     | <i>Glyceria leptostachya</i>       | DQ665514 |
| Monocotyledons | Poaceae     | <i>Glyceria</i>     | <i>Glyceria maxima</i>             | DQ665515 |
| Monocotyledons | Poaceae     | <i>Glyceria</i>     | <i>Glyceria maxima</i>             | DQ665516 |
| Monocotyledons | Poaceae     | <i>Glyceria</i>     | <i>Glyceria notata</i>             | DQ665518 |
| Monocotyledons | Poaceae     | <i>Glyceria</i>     | <i>Glyceria notata</i>             | DQ665519 |
| Monocotyledons | Poaceae     | <i>Glyceria</i>     | <i>Glyceria occidentalis</i>       | DQ665520 |
| Monocotyledons | Poaceae     | <i>Glyceria</i>     | <i>Glyceria occidentalis</i>       | DQ665521 |
| Monocotyledons | Poaceae     | <i>Glyceria</i>     | <i>Glyceria occidentalis</i>       | DQ665522 |
| Monocotyledons | Poaceae     | <i>Glyceria</i>     | <i>Glyceria occidentalis</i>       | DQ665523 |
| Monocotyledons | Poaceae     | <i>Glyceria</i>     | <i>Glyceria occidentalis</i>       | DQ665524 |
| Monocotyledons | Poaceae     | <i>Glyceria</i>     | <i>Glyceria occidentalis</i>       | DQ665525 |
| Monocotyledons | Poaceae     | <i>Glyceria</i>     | <i>Glyceria occidentalis</i>       | DQ665526 |
| Monocotyledons | Poaceae     | <i>Glyceria</i>     | <i>Glyceria occidentalis</i>       | DQ665527 |
| Monocotyledons | Poaceae     | <i>Glyceria</i>     | <i>Glyceria occidentalis</i>       | DQ665528 |
| Monocotyledons | Poaceae     | <i>Glyceria</i>     | <i>Glyceria occidentalis</i>       | DQ665529 |
| Monocotyledons | Poaceae     | <i>Glyceria</i>     | <i>Glyceria septentrionalis</i>    | DQ665530 |
| Monocotyledons | Poaceae     | <i>Glyceria</i>     | <i>Glyceria septentrionalis</i>    | DQ665531 |
| Monocotyledons | Poaceae     | <i>Glyceria</i>     | <i>Glyceria septentrionalis</i>    | DQ665532 |
| Monocotyledons | Poaceae     | <i>Glyceria</i>     | <i>Glyceria septentrionalis</i>    | DQ665533 |
| Monocotyledons | Poaceae     | <i>Glyceria</i>     | <i>Glyceria septentrionalis</i>    | DQ665534 |
| Monocotyledons | Poaceae     | <i>Jarava</i>       | <i>Jarava leptostachya</i>         | EU489270 |
| Monocotyledons | Poaceae     | <i>Jarava</i>       | <i>Jarava leptostachya</i>         | EU489271 |
| Monocotyledons | Poaceae     | <i>Nassella</i>     | <i>Nassella cordobensis</i>        | EU204713 |
| Monocotyledons | Poaceae     | <i>Nassella</i>     | <i>Nassella cordobensis</i>        | EU204714 |
| Monocotyledons | Poaceae     | <i>Nassella</i>     | <i>Nassella hyalina</i>            | EU204715 |
| Monocotyledons | Poaceae     | <i>Nassella</i>     | <i>Nassella hyalina</i>            | EU204716 |
| Monocotyledons | Poaceae     | <i>Nassella</i>     | <i>Nassella hyalina</i>            | EU204717 |
| Monocotyledons | Poaceae     | <i>Nassella</i>     | <i>Nassella neesiana</i>           | EU489297 |
| Monocotyledons | Poaceae     | <i>Nassella</i>     | <i>Nassella neesiana</i>           | EU204719 |
| Monocotyledons | Poaceae     | <i>Nassella</i>     | <i>Nassella neesiana</i>           | EU204720 |
| Monocotyledons | Orchidaceae | <i>Bulbophyllum</i> | <i>Bulbophyllum longiflorum</i>    | EF200405 |
| Monocotyledons | Orchidaceae | <i>Bulbophyllum</i> | <i>Bulbophyllum longiflorum</i>    | EF200406 |
| Monocotyledons | Poaceae     | <i>Eragrostis</i>   | <i>Eragrostis pectinacea</i>       | HQ596686 |
| Monocotyledons | Poaceae     | <i>Eragrostis</i>   | <i>Eragrostis pectinacea</i>       | HQ596687 |
| Monocotyledons | Poaceae     | <i>Eragrostis</i>   | <i>Eragrostis pectinacea</i>       | GQ248299 |
| Monocotyledons | Poaceae     | <i>Eragrostis</i>   | <i>Eragrostis pectinacea</i>       | EF590696 |
| Monocotyledons | Orchidaceae | <i>Bulbophyllum</i> | <i>Bulbophyllum analamazoatrae</i> | EF200408 |
| Monocotyledons | Orchidaceae | <i>Bulbophyllum</i> | <i>Bulbophyllum analamazoatrae</i> | EF200409 |
| Monocotyledons | Orchidaceae | <i>Bulbophyllum</i> | <i>Bulbophyllum elliottii</i>      | EF200388 |
| Monocotyledons | Orchidaceae | <i>Bulbophyllum</i> | <i>Bulbophyllum elliottii</i>      | EF200389 |
| Monocotyledons | Orchidaceae | <i>Bulbophyllum</i> | <i>Bulbophyllum elliottii</i>      | EF200390 |
| Monocotyledons | Orchidaceae | <i>Bulbophyllum</i> | <i>Bulbophyllum elliottii</i>      | EF200391 |
| Monocotyledons | Orchidaceae | <i>Bulbophyllum</i> | <i>Bulbophyllum francoisii</i>     | EF200411 |
| Monocotyledons | Orchidaceae | <i>Bulbophyllum</i> | <i>Bulbophyllum francoisii</i>     | EF200417 |
| Monocotyledons | Orchidaceae | <i>Bulbophyllum</i> | <i>Bulbophyllum henrici</i>        | EF200480 |
| Monocotyledons | Orchidaceae | <i>Bulbophyllum</i> | <i>Bulbophyllum henrici</i>        | EF200491 |

|                |             |                     |                                   |          |
|----------------|-------------|---------------------|-----------------------------------|----------|
| Monocotyledons | Orchidaceae | <i>Bulbophyllum</i> | <i>Bulbophyllum longivaginans</i> | EF200463 |
| Monocotyledons | Orchidaceae | <i>Bulbophyllum</i> | <i>Bulbophyllum longivaginans</i> | EF200464 |
| Monocotyledons | Orchidaceae | <i>Bulbophyllum</i> | <i>Bulbophyllum matitanense</i>   | EF200393 |
| Monocotyledons | Orchidaceae | <i>Bulbophyllum</i> | <i>Bulbophyllum matitanense</i>   | EF200396 |
| Monocotyledons | Orchidaceae | <i>Bulbophyllum</i> | <i>Bulbophyllum oxycalyx</i>      | EF200412 |
| Monocotyledons | Orchidaceae | <i>Bulbophyllum</i> | <i>Bulbophyllum oxycalyx</i>      | EF200416 |
| Monocotyledons | Orchidaceae | <i>Bulbophyllum</i> | <i>Bulbophyllum pachypus</i>      | EF200466 |
| Monocotyledons | Orchidaceae | <i>Bulbophyllum</i> | <i>Bulbophyllum pachypus</i>      | EF200471 |
| Monocotyledons | Orchidaceae | <i>Bulbophyllum</i> | <i>Bulbophyllum rauhii</i>        | EF200413 |
| Monocotyledons | Orchidaceae | <i>Bulbophyllum</i> | <i>Bulbophyllum rauhii</i>        | EF200414 |
| Monocotyledons | Orchidaceae | <i>Bulbophyllum</i> | <i>Bulbophyllum falcatum</i>      | GQ339616 |
| Monocotyledons | Orchidaceae | <i>Bulbophyllum</i> | <i>Bulbophyllum falcatum</i>      | JF693811 |
| Monocotyledons | Orchidaceae | <i>Cypripedium</i>  | <i>Cypripedium debile</i>         | JF796983 |
| Monocotyledons | Orchidaceae | <i>Cypripedium</i>  | <i>Cypripedium debile</i>         | JF796986 |
| Monocotyledons | Orchidaceae | <i>Cypripedium</i>  | <i>Cypripedium debile</i>         | JF796987 |
| Monocotyledons | Orchidaceae | <i>Cypripedium</i>  | <i>Cypripedium henryi</i>         | JQ080173 |
| Monocotyledons | Orchidaceae | <i>Cypripedium</i>  | <i>Cypripedium henryi</i>         | JF796956 |
| Monocotyledons | Poaceae     | <i>Jarava</i>       | <i>Jarava eriostachya</i>         | EU204702 |
| Monocotyledons | Poaceae     | <i>Jarava</i>       | <i>Jarava eriostachya</i>         | EU204703 |
| Monocotyledons | Poaceae     | <i>Jarava</i>       | <i>Jarava eriostachya</i>         | EU204704 |
| Monocotyledons | Poaceae     | <i>Jarava</i>       | <i>Jarava eriostachya</i>         | EU204705 |
| Monocotyledons | Poaceae     | <i>Jarava</i>       | <i>Jarava humilis</i>             | EU489263 |
| Monocotyledons | Poaceae     | <i>Jarava</i>       | <i>Jarava humilis</i>             | EU489264 |
| Monocotyledons | Poaceae     | <i>Jarava</i>       | <i>Jarava humilis</i>             | EU489265 |
| Monocotyledons | Poaceae     | <i>Jarava</i>       | <i>Jarava humilis</i>             | EU204732 |
| Monocotyledons | Poaceae     | <i>Jarava</i>       | <i>Jarava humilis</i>             | EU204733 |
| Monocotyledons | Orchidaceae | <i>Encyclia</i>     | <i>Encyclia alata</i>             | EU213730 |
| Monocotyledons | Orchidaceae | <i>Encyclia</i>     | <i>Encyclia alata</i>             | EU213731 |
| Monocotyledons | Orchidaceae | <i>Oncidium</i>     | <i>Oncidium obryzatoides</i>      | EU213752 |
| Monocotyledons | Orchidaceae | <i>Oncidium</i>     | <i>Oncidium obryzatoides</i>      | FJ564374 |
| Monocotyledons | Orchidaceae | <i>Oncidium</i>     | <i>Oncidium storkii</i>           | EU213753 |
| Monocotyledons | Orchidaceae | <i>Oncidium</i>     | <i>Oncidium storkii</i>           | FJ564375 |
| Monocotyledons | Poaceae     | <i>Jarava</i>       | <i>Jarava frigida</i>             | EU489260 |
| Monocotyledons | Poaceae     | <i>Jarava</i>       | <i>Jarava frigida</i>             | EU489261 |
| Monocotyledons | Orchidaceae | <i>Leochilus</i>    | <i>Leochilus inconspicuus</i>     | FJ564430 |
| Monocotyledons | Orchidaceae | <i>Leochilus</i>    | <i>Leochilus inconspicuus</i>     | FJ564440 |
| Monocotyledons | Orchidaceae | <i>Leochilus</i>    | <i>Leochilus leiboldi</i>         | FJ564139 |
| Monocotyledons | Orchidaceae | <i>Leochilus</i>    | <i>Leochilus leiboldi</i>         | FJ564428 |
| Monocotyledons | Orchidaceae | <i>Oncidium</i>     | <i>Oncidium echinops</i>          | FJ564327 |
| Monocotyledons | Orchidaceae | <i>Oncidium</i>     | <i>Oncidium echinops</i>          | FJ564505 |
| Monocotyledons | Orchidaceae | <i>Oncidium</i>     | <i>Oncidium echinops</i>          | FJ564594 |
| Monocotyledons | Orchidaceae | <i>Oncidium</i>     | <i>Oncidium peruvianoides</i>     | FJ564458 |
| Monocotyledons | Orchidaceae | <i>Oncidium</i>     | <i>Oncidium peruvianoides</i>     | FJ564512 |
| Monocotyledons | Poaceae     | <i>Tripogon</i>     | <i>Tripogon wightii</i>           | FJ610317 |
| Monocotyledons | Poaceae     | <i>Tripogon</i>     | <i>Tripogon wightii</i>           | FJ610318 |
| Monocotyledons | Poaceae     | <i>Tripogon</i>     | <i>Tripogon wightii</i>           | FJ610319 |
| Monocotyledons | Poaceae     | <i>Tripogon</i>     | <i>Tripogon wightii</i>           | FJ610320 |
| Monocotyledons | Poaceae     | <i>Tripogon</i>     | <i>Tripogon wightii</i>           | FJ610321 |
| Monocotyledons | Orchidaceae | <i>Oncidium</i>     | <i>Oncidium heterodactylum</i>    | FJ564516 |
| Monocotyledons | Orchidaceae | <i>Oncidium</i>     | <i>Oncidium heterodactylum</i>    | FJ564536 |
| Monocotyledons | Orchidaceae | <i>Oncidium</i>     | <i>Oncidium heterodactylum</i>    | FJ564538 |
| Monocotyledons | Orchidaceae | <i>Oncidium</i>     | <i>Oncidium iricolor</i>          | FJ564371 |
| Monocotyledons | Orchidaceae | <i>Oncidium</i>     | <i>Oncidium iricolor</i>          | FJ564628 |

|                |               |                     |                                |          |
|----------------|---------------|---------------------|--------------------------------|----------|
| Monocotyledons | Orchidaceae   | <i>Oncidium</i>     | <i>Oncidium boothianum</i>     | FJ564535 |
| Monocotyledons | Orchidaceae   | <i>Oncidium</i>     | <i>Oncidium boothianum</i>     | FJ564581 |
| Monocotyledons | Orchidaceae   | <i>Oncidium</i>     | <i>Oncidium boothianum</i>     | FJ564588 |
| Monocotyledons | Orchidaceae   | <i>Oncidium</i>     | <i>Oncidium boothianum</i>     | FJ564589 |
| Monocotyledons | Orchidaceae   | <i>Oncidium</i>     | <i>Oncidium schmidtianum</i>   | FJ564514 |
| Monocotyledons | Orchidaceae   | <i>Oncidium</i>     | <i>Oncidium schmidtianum</i>   | FJ564576 |
| Monocotyledons | Orchidaceae   | <i>Oncidium</i>     | <i>Oncidium schroederianum</i> | FJ564198 |
| Monocotyledons | Orchidaceae   | <i>Oncidium</i>     | <i>Oncidium schroederianum</i> | FJ564429 |
| Monocotyledons | Orchidaceae   | <i>Cypripedium</i>  | <i>Cypripedium micranthum</i>  | GQ248282 |
| Monocotyledons | Orchidaceae   | <i>Cypripedium</i>  | <i>Cypripedium micranthum</i>  | JF796964 |
| Monocotyledons | Poaceae       | <i>Tripogon</i>     | <i>Tripogon copei</i>          | FJ707304 |
| Monocotyledons | Poaceae       | <i>Tripogon</i>     | <i>Tripogon copei</i>          | FJ707305 |
| Monocotyledons | Poaceae       | <i>Tripogon</i>     | <i>Tripogon copei</i>          | FJ707306 |
| Monocotyledons | Poaceae       | <i>Tripogon</i>     | <i>Tripogon copei</i>          | FJ707307 |
| Monocotyledons | Poaceae       | <i>Tripogon</i>     | <i>Tripogon copei</i>          | FJ707308 |
| Monocotyledons | Poaceae       | <i>Bambusa</i>      | <i>Bambusa distegia</i>        | GU390995 |
| Monocotyledons | Poaceae       | <i>Bambusa</i>      | <i>Bambusa distegia</i>        | GU063081 |
| Monocotyledons | Orchidaceae   | <i>Bulbophyllum</i> | <i>Bulbophyllum exaltatum</i>  | GQ339640 |
| Monocotyledons | Orchidaceae   | <i>Bulbophyllum</i> | <i>Bulbophyllum exaltatum</i>  | GQ339641 |
| Monocotyledons | Poaceae       | <i>Cenchrus</i>     | <i>Cenchrus stramineus</i>     | HQ876987 |
| Monocotyledons | Poaceae       | <i>Cenchrus</i>     | <i>Cenchrus stramineus</i>     | HQ876988 |
| Monocotyledons | Poaceae       | <i>Sporobolus</i>   | <i>Sporobolus ioclados</i>     | HQ876994 |
| Monocotyledons | Poaceae       | <i>Sporobolus</i>   | <i>Sporobolus ioclados</i>     | HQ876995 |
| Monocotyledons | Poaceae       | <i>Sporobolus</i>   | <i>Sporobolus rangei</i>       | HQ877000 |
| Monocotyledons | Poaceae       | <i>Sporobolus</i>   | <i>Sporobolus rangei</i>       | HQ877001 |
| Monocotyledons | Poaceae       | <i>Urochloa</i>     | <i>Urochloa brachyura</i>      | HQ877006 |
| Monocotyledons | Poaceae       | <i>Urochloa</i>     | <i>Urochloa brachyura</i>      | HQ877007 |
| Monocotyledons | Poaceae       | <i>Urochloa</i>     | <i>Urochloa brachyura</i>      | HQ877008 |
| Monocotyledons | Araceae       | <i>Colocasia</i>    | <i>Colocasia lihengiae</i>     | JF828133 |
| Monocotyledons | Araceae       | <i>Colocasia</i>    | <i>Colocasia lihengiae</i>     | JF828137 |
| Monocotyledons | Dioscoreaceae | <i>Tacca</i>        | <i>Tacca ampliplacenta</i>     | JN850584 |
| Monocotyledons | Dioscoreaceae | <i>Tacca</i>        | <i>Tacca ampliplacenta</i>     | JN047314 |
| Monocotyledons | Dioscoreaceae | <i>Tacca</i>        | <i>Tacca ampliplacenta</i>     | JN047315 |
| Monocotyledons | Dioscoreaceae | <i>Tacca</i>        | <i>Tacca ampliplacenta</i>     | JN047316 |
| Monocotyledons | Dioscoreaceae | <i>Tacca</i>        | <i>Tacca ampliplacenta</i>     | JN047317 |
| Monocotyledons | Dioscoreaceae | <i>Tacca</i>        | <i>Tacca ampliplacenta</i>     | JN047318 |
| Monocotyledons | Dioscoreaceae | <i>Tacca</i>        | <i>Tacca ampliplacenta</i>     | JN047319 |
| Monocotyledons | Dioscoreaceae | <i>Tacca</i>        | <i>Tacca ampliplacenta</i>     | JN047320 |
| Monocotyledons | Dioscoreaceae | <i>Tacca</i>        | <i>Tacca ampliplacenta</i>     | JN047321 |
| Monocotyledons | Dioscoreaceae | <i>Tacca</i>        | <i>Tacca ampliplacenta</i>     | JN047322 |
| Monocotyledons | Dioscoreaceae | <i>Tacca</i>        | <i>Tacca ampliplacenta</i>     | JN047323 |
| Monocotyledons | Dioscoreaceae | <i>Tacca</i>        | <i>Tacca subflabellata</i>     | JN850593 |
| Monocotyledons | Dioscoreaceae | <i>Tacca</i>        | <i>Tacca subflabellata</i>     | JN047359 |
| Monocotyledons | Dioscoreaceae | <i>Tacca</i>        | <i>Tacca subflabellata</i>     | JN047360 |
| Monocotyledons | Dioscoreaceae | <i>Tacca</i>        | <i>Tacca subflabellata</i>     | JN047361 |
| Monocotyledons | Dioscoreaceae | <i>Tacca</i>        | <i>Tacca subflabellata</i>     | JN047362 |
| Monocotyledons | Poaceae       | <i>Festuca</i>      | <i>Festuca arundinacea</i>     | HQ596699 |
| Monocotyledons | Poaceae       | <i>Festuca</i>      | <i>Festuca arundinacea</i>     | HQ596753 |
| Monocotyledons | Musaceae      | <i>Musa</i>         | <i>Musa acuminata</i>          | FJ871854 |
| Monocotyledons | Musaceae      | <i>Musa</i>         | <i>Musa acuminata</i>          | FJ871855 |
| Monocotyledons | Musaceae      | <i>Musa</i>         | <i>Musa acuminata</i>          | FJ871856 |
| Monocotyledons | Musaceae      | <i>Musa</i>         | <i>Musa acuminata</i>          | FJ871857 |
| Monocotyledons | Musaceae      | <i>Musa</i>         | <i>Musa acuminata</i>          | FJ871858 |

|                |                |                  |                               |          |
|----------------|----------------|------------------|-------------------------------|----------|
| Monocotyledons | Musaceae       | <i>Musa</i>      | <i>Musa acuminata</i>         | FJ871859 |
| Monocotyledons | Musaceae       | <i>Musa</i>      | <i>Musa acuminata</i>         | FJ871860 |
| Monocotyledons | Musaceae       | <i>Musa</i>      | <i>Musa acuminata</i>         | FJ871861 |
| Monocotyledons | Musaceae       | <i>Musa</i>      | <i>Musa acuminata</i>         | FJ871862 |
| Monocotyledons | Musaceae       | <i>Musa</i>      | <i>Musa acuminata</i>         | FJ871863 |
| Monocotyledons | Musaceae       | <i>Musa</i>      | <i>Musa acuminata</i>         | FJ871864 |
| Monocotyledons | Musaceae       | <i>Musa</i>      | <i>Musa acuminata</i>         | FJ871865 |
| Monocotyledons | Musaceae       | <i>Musa</i>      | <i>Musa acuminata</i>         | FJ871866 |
| Monocotyledons | Musaceae       | <i>Musa</i>      | <i>Musa acuminata</i>         | FJ871867 |
| Monocotyledons | Musaceae       | <i>Musa</i>      | <i>Musa acuminata</i>         | FJ871868 |
| Monocotyledons | Musaceae       | <i>Musa</i>      | <i>Musa acuminata</i>         | FJ871869 |
| Monocotyledons | Musaceae       | <i>Musa</i>      | <i>Musa acuminata</i>         | FJ871915 |
| Monocotyledons | Musaceae       | <i>Musa</i>      | <i>Musa acuminata</i>         | FJ871916 |
| Monocotyledons | Dioscoreaceae  | <i>Dioscorea</i> | <i>Dioscorea japonica</i>     | JQ260355 |
| Monocotyledons | Dioscoreaceae  | <i>Dioscorea</i> | <i>Dioscorea japonica</i>     | JQ260356 |
| Monocotyledons | Dioscoreaceae  | <i>Dioscorea</i> | <i>Dioscorea japonica</i>     | JQ260357 |
| Monocotyledons | Dioscoreaceae  | <i>Dioscorea</i> | <i>Dioscorea japonica</i>     | JQ260358 |
| Monocotyledons | Dioscoreaceae  | <i>Dioscorea</i> | <i>Dioscorea japonica</i>     | JQ260359 |
| Monocotyledons | Dioscoreaceae  | <i>Dioscorea</i> | <i>Dioscorea japonica</i>     | GQ166695 |
| Monocotyledons | Amaryllidaceae | <i>Allium</i>    | <i>Allium tuberosum</i>       | GQ434884 |
| Monocotyledons | Amaryllidaceae | <i>Allium</i>    | <i>Allium tuberosum</i>       | GQ434885 |
| Monocotyledons | Amaryllidaceae | <i>Allium</i>    | <i>Allium tuberosum</i>       | GQ434886 |
| Monocotyledons | Amaryllidaceae | <i>Allium</i>    | <i>Allium tuberosum</i>       | GQ434887 |
| Monocotyledons | Amaryllidaceae | <i>Allium</i>    | <i>Allium tuberosum</i>       | GQ434888 |
| Monocotyledons | Asparagaceae   | <i>Asparagus</i> | <i>Asparagus officinalis</i>  | HM990123 |
| Monocotyledons | Asparagaceae   | <i>Asparagus</i> | <i>Asparagus officinalis</i>  | HM990126 |
| Monocotyledons | Asparagaceae   | <i>Asparagus</i> | <i>Asparagus officinalis</i>  | HM990127 |
| Monocotyledons | Asparagaceae   | <i>Asparagus</i> | <i>Asparagus officinalis</i>  | HM990129 |
| Monocotyledons | Asparagaceae   | <i>Asparagus</i> | <i>Asparagus officinalis</i>  | HM990131 |
| Monocotyledons | Asparagaceae   | <i>Asparagus</i> | <i>Asparagus officinalis</i>  | HM990132 |
| Monocotyledons | Asparagaceae   | <i>Asparagus</i> | <i>Asparagus officinalis</i>  | HM990133 |
| Monocotyledons | Asparagaceae   | <i>Asparagus</i> | <i>Asparagus officinalis</i>  | HM990134 |
| Monocotyledons | Asparagaceae   | <i>Asparagus</i> | <i>Asparagus officinalis</i>  | HM990135 |
| Monocotyledons | Asparagaceae   | <i>Asparagus</i> | <i>Asparagus officinalis</i>  | HM990136 |
| Monocotyledons | Asparagaceae   | <i>Asparagus</i> | <i>Asparagus officinalis</i>  | HM990137 |
| Monocotyledons | Asparagaceae   | <i>Asparagus</i> | <i>Asparagus officinalis</i>  | HM990139 |
| Monocotyledons | Asparagaceae   | <i>Asparagus</i> | <i>Asparagus officinalis</i>  | HM990142 |
| Monocotyledons | Asparagaceae   | <i>Asparagus</i> | <i>Asparagus officinalis</i>  | HM990143 |
| Monocotyledons | Asparagaceae   | <i>Asparagus</i> | <i>Asparagus officinalis</i>  | HM990144 |
| Monocotyledons | Asparagaceae   | <i>Asparagus</i> | <i>Asparagus officinalis</i>  | HM990146 |
| Monocotyledons | Asparagaceae   | <i>Asparagus</i> | <i>Asparagus officinalis</i>  | HM990147 |
| Monocotyledons | Pandanaceae    | <i>Pandanus</i>  | <i>Pandanus tectorius</i>     | JN407018 |
| Monocotyledons | Pandanaceae    | <i>Pandanus</i>  | <i>Pandanus tectorius</i>     | JN407019 |
| Monocotyledons | Pandanaceae    | <i>Pandanus</i>  | <i>Pandanus tectorius</i>     | JN407020 |
| Monocotyledons | Typhaceae      | <i>Typha</i>     | <i>Typha latifolia</i>        | EU750605 |
| Monocotyledons | Typhaceae      | <i>Typha</i>     | <i>Typha latifolia</i>        | EU750606 |
| Monocotyledons | Typhaceae      | <i>Typha</i>     | <i>Typha latifolia</i>        | HQ913730 |
| Monocotyledons | Commelinaceae  | <i>Commelina</i> | <i>Commelina benghalensis</i> | JN044308 |
| Monocotyledons | Commelinaceae  | <i>Commelina</i> | <i>Commelina benghalensis</i> | JN044309 |
| Monocotyledons | Commelinaceae  | <i>Commelina</i> | <i>Commelina benghalensis</i> | JN044310 |
| Monocotyledons | Dioscoreaceae  | <i>Dioscorea</i> | <i>Dioscorea bulbifera</i>    | JQ260317 |
| Monocotyledons | Dioscoreaceae  | <i>Dioscorea</i> | <i>Dioscorea bulbifera</i>    | JQ260318 |
| Monocotyledons | Dioscoreaceae  | <i>Dioscorea</i> | <i>Dioscorea bulbifera</i>    | JQ260319 |

|                |               |                    |                              |          |
|----------------|---------------|--------------------|------------------------------|----------|
| Monocotyledons | Dioscoreaceae | <i>Dioscorea</i>   | <i>Dioscorea bulbifera</i>   | JQ260320 |
| Monocotyledons | Dioscoreaceae | <i>Dioscorea</i>   | <i>Dioscorea bulbifera</i>   | JQ260321 |
| Monocotyledons | Dioscoreaceae | <i>Dioscorea</i>   | <i>Dioscorea bulbifera</i>   | JQ260322 |
| Monocotyledons | Dioscoreaceae | <i>Dioscorea</i>   | <i>Dioscorea bulbifera</i>   | JQ260323 |
| Monocotyledons | Dioscoreaceae | <i>Dioscorea</i>   | <i>Dioscorea bulbifera</i>   | JQ260324 |
| Monocotyledons | Dioscoreaceae | <i>Dioscorea</i>   | <i>Dioscorea bulbifera</i>   | JQ260325 |
| Monocotyledons | Dioscoreaceae | <i>Dioscorea</i>   | <i>Dioscorea bulbifera</i>   | JQ260326 |
| Monocotyledons | Dioscoreaceae | <i>Dioscorea</i>   | <i>Dioscorea bulbifera</i>   | JQ260327 |
| Monocotyledons | Dioscoreaceae | <i>Dioscorea</i>   | <i>Dioscorea bulbifera</i>   | JQ260328 |
| Monocotyledons | Dioscoreaceae | <i>Dioscorea</i>   | <i>Dioscorea bulbifera</i>   | JQ260329 |
| Monocotyledons | Dioscoreaceae | <i>Dioscorea</i>   | <i>Dioscorea bulbifera</i>   | GQ248290 |
| Monocotyledons | Dioscoreaceae | <i>Dioscorea</i>   | <i>Dioscorea bulbifera</i>   | GU135334 |
| Monocotyledons | Bromeliaceae  | <i>Vriesea</i>     | <i>Vriesea malzinei</i>      | FM958006 |
| Monocotyledons | Bromeliaceae  | <i>Vriesea</i>     | <i>Vriesea malzinei</i>      | HQ913733 |
| Monocotyledons | Smilacaceae   | <i>Smilax</i>      | <i>Smilax china</i>          | GU372808 |
| Monocotyledons | Smilacaceae   | <i>Smilax</i>      | <i>Smilax china</i>          | GU372814 |
| Monocotyledons | Smilacaceae   | <i>Smilax</i>      | <i>Smilax china</i>          | GU372817 |
| Monocotyledons | Melanthiaceae | <i>Veratrum</i>    | <i>Veratrum album</i>        | JF807737 |
| Monocotyledons | Melanthiaceae | <i>Veratrum</i>    | <i>Veratrum album</i>        | JF807738 |
| Monocotyledons | Melanthiaceae | <i>Veratrum</i>    | <i>Veratrum album</i>        | JF807739 |
| Monocotyledons | Poaceae       | <i>Kengyilia</i>   | <i>Kengyilia alata</i>       | JN045083 |
| Monocotyledons | Poaceae       | <i>Kengyilia</i>   | <i>Kengyilia alata</i>       | JN045084 |
| Monocotyledons | Poaceae       | <i>Kengyilia</i>   | <i>Kengyilia alata</i>       | HQ652842 |
| Monocotyledons | Melanthiaceae | <i>Trillium</i>    | <i>Trillium erectum</i>      | DQ404230 |
| Monocotyledons | Melanthiaceae | <i>Trillium</i>    | <i>Trillium erectum</i>      | HQ596871 |
| Monocotyledons | Poaceae       | <i>Festuca</i>     | <i>Festuca rubra</i>         | DQ369760 |
| Monocotyledons | Poaceae       | <i>Festuca</i>     | <i>Festuca rubra</i>         | DQ369762 |
| Monocotyledons | Poaceae       | <i>Festuca</i>     | <i>Festuca rubra</i>         | FJ395494 |
| Monocotyledons | Poaceae       | <i>Piptatherum</i> | <i>Piptatherum miliaceum</i> | EU204759 |
| Monocotyledons | Poaceae       | <i>Piptatherum</i> | <i>Piptatherum miliaceum</i> | EU204760 |
| Monocotyledons | Poaceae       | <i>Piptatherum</i> | <i>Piptatherum miliaceum</i> | EU204761 |
| Monocotyledons | Musaceae      | <i>Musa</i>        | <i>Musa schizocarpa</i>      | FJ871921 |
| Monocotyledons | Musaceae      | <i>Musa</i>        | <i>Musa schizocarpa</i>      | FJ871922 |
| Monocotyledons | Musaceae      | <i>Musa</i>        | <i>Musa balbisiana</i>       | FJ871870 |
| Monocotyledons | Musaceae      | <i>Musa</i>        | <i>Musa balbisiana</i>       | FJ871871 |
| Monocotyledons | Musaceae      | <i>Musa</i>        | <i>Musa balbisiana</i>       | FJ871872 |
| Monocotyledons | Musaceae      | <i>Musa</i>        | <i>Musa balbisiana</i>       | FJ871873 |
| Monocotyledons | Musaceae      | <i>Musa</i>        | <i>Musa balbisiana</i>       | FJ871874 |
| Monocotyledons | Musaceae      | <i>Musa</i>        | <i>Musa balbisiana</i>       | FJ871875 |
| Monocotyledons | Musaceae      | <i>Musa</i>        | <i>Musa balbisiana</i>       | FJ871876 |
| Monocotyledons | Melanthiaceae | <i>Trillium</i>    | <i>Trillium grandiflorum</i> | DQ404229 |
| Monocotyledons | Melanthiaceae | <i>Trillium</i>    | <i>Trillium grandiflorum</i> | HQ596872 |
| Monocotyledons | Dioscoreaceae | <i>Dioscorea</i>   | <i>Dioscorea alata</i>       | JQ260391 |
| Monocotyledons | Dioscoreaceae | <i>Dioscorea</i>   | <i>Dioscorea alata</i>       | JQ260392 |
| Monocotyledons | Dioscoreaceae | <i>Dioscorea</i>   | <i>Dioscorea alata</i>       | JQ260393 |
| Monocotyledons | Dioscoreaceae | <i>Dioscorea</i>   | <i>Dioscorea alata</i>       | JQ260394 |
| Monocotyledons | Dioscoreaceae | <i>Dioscorea</i>   | <i>Dioscorea alata</i>       | JQ260395 |
| Monocotyledons | Dioscoreaceae | <i>Dioscorea</i>   | <i>Dioscorea alata</i>       | GU135445 |
| Monocotyledons | Dioscoreaceae | <i>Dioscorea</i>   | <i>Dioscorea polystachya</i> | JQ260344 |
| Monocotyledons | Dioscoreaceae | <i>Dioscorea</i>   | <i>Dioscorea polystachya</i> | JQ260345 |
| Monocotyledons | Dioscoreaceae | <i>Dioscorea</i>   | <i>Dioscorea polystachya</i> | JQ260346 |
| Monocotyledons | Dioscoreaceae | <i>Dioscorea</i>   | <i>Dioscorea polystachya</i> | JQ260347 |
| Monocotyledons | Dioscoreaceae | <i>Dioscorea</i>   | <i>Dioscorea polystachya</i> | JQ260348 |

|                |               |                  |                              |          |
|----------------|---------------|------------------|------------------------------|----------|
| Monocotyledons | Dioscoreaceae | <i>Dioscorea</i> | <i>Dioscorea polystachya</i> | JQ260349 |
| Monocotyledons | Dioscoreaceae | <i>Dioscorea</i> | <i>Dioscorea polystachya</i> | JQ260350 |
| Monocotyledons | Dioscoreaceae | <i>Dioscorea</i> | <i>Dioscorea polystachya</i> | JQ260351 |
| Monocotyledons | Dioscoreaceae | <i>Dioscorea</i> | <i>Dioscorea polystachya</i> | JQ260352 |
| Monocotyledons | Dioscoreaceae | <i>Dioscorea</i> | <i>Dioscorea polystachya</i> | JQ260353 |
| Monocotyledons | Dioscoreaceae | <i>Dioscorea</i> | <i>Dioscorea polystachya</i> | JQ260354 |
| Monocotyledons | Dioscoreaceae | <i>Dioscorea</i> | <i>Dioscorea communis</i>    | FJ395544 |
| Monocotyledons | Dioscoreaceae | <i>Dioscorea</i> | <i>Dioscorea communis</i>    | FR865112 |
| Monocotyledons | Typhaceae     | <i>Typha</i>     | <i>Typha angustifolia</i>    | GQ435010 |
| Monocotyledons | Typhaceae     | <i>Typha</i>     | <i>Typha angustifolia</i>    | EU750603 |
| Monocotyledons | Typhaceae     | <i>Typha</i>     | <i>Typha angustifolia</i>    | EU750604 |
| Monocotyledons | Liliaceae     | <i>Lloydia</i>   | <i>Lloydia serotina</i>      | AM238530 |
| Monocotyledons | Liliaceae     | <i>Lloydia</i>   | <i>Lloydia serotina</i>      | AM409337 |
| Monocotyledons | Liliaceae     | <i>Lloydia</i>   | <i>Lloydia serotina</i>      | EU939288 |
| Monocotyledons | Dioscoreaceae | <i>Dioscorea</i> | <i>Dioscorea tokoro</i>      | JQ260262 |
| Monocotyledons | Dioscoreaceae | <i>Dioscorea</i> | <i>Dioscorea tokoro</i>      | JQ260263 |
| Monocotyledons | Dioscoreaceae | <i>Dioscorea</i> | <i>Dioscorea tokoro</i>      | JQ260264 |
| Monocotyledons | Dioscoreaceae | <i>Dioscorea</i> | <i>Dioscorea tokoro</i>      | JQ260265 |
| Monocotyledons | Dioscoreaceae | <i>Dioscorea</i> | <i>Dioscorea gracillima</i>  | JQ260281 |
| Monocotyledons | Dioscoreaceae | <i>Dioscorea</i> | <i>Dioscorea gracillima</i>  | JQ260282 |
| Monocotyledons | Dioscoreaceae | <i>Dioscorea</i> | <i>Dioscorea gracillima</i>  | JQ260283 |
| Monocotyledons | Dioscoreaceae | <i>Dioscorea</i> | <i>Dioscorea gracillima</i>  | JQ260284 |
| Monocotyledons | Dioscoreaceae | <i>Dioscorea</i> | <i>Dioscorea gracillima</i>  | JQ260285 |
| Monocotyledons | Dioscoreaceae | <i>Dioscorea</i> | <i>Dioscorea gracillima</i>  | JQ260286 |
| Monocotyledons | Dioscoreaceae | <i>Dioscorea</i> | <i>Dioscorea gracillima</i>  | JQ260287 |
| Monocotyledons | Dioscoreaceae | <i>Dioscorea</i> | <i>Dioscorea gracillima</i>  | JQ260288 |
| Monocotyledons | Dioscoreaceae | <i>Dioscorea</i> | <i>Dioscorea gracillima</i>  | JQ260289 |
| Monocotyledons | Dioscoreaceae | <i>Dioscorea</i> | <i>Dioscorea gracillima</i>  | JQ260290 |
| Monocotyledons | Dioscoreaceae | <i>Dioscorea</i> | <i>Dioscorea nipponica</i>   | JQ260253 |
| Monocotyledons | Dioscoreaceae | <i>Dioscorea</i> | <i>Dioscorea nipponica</i>   | JQ260254 |
| Monocotyledons | Dioscoreaceae | <i>Dioscorea</i> | <i>Dioscorea nipponica</i>   | JQ260255 |
| Monocotyledons | Dioscoreaceae | <i>Dioscorea</i> | <i>Dioscorea nipponica</i>   | JQ260256 |
| Monocotyledons | Dioscoreaceae | <i>Dioscorea</i> | <i>Dioscorea nipponica</i>   | GQ435354 |
| Monocotyledons | Dioscoreaceae | <i>Dioscorea</i> | <i>Dioscorea nipponica</i>   | DQ098159 |
| Monocotyledons | Dioscoreaceae | <i>Dioscorea</i> | <i>Dioscorea nipponica</i>   | DQ124706 |
| Monocotyledons | Dioscoreaceae | <i>Dioscorea</i> | <i>Dioscorea septemloba</i>  | JQ260301 |
| Monocotyledons | Dioscoreaceae | <i>Dioscorea</i> | <i>Dioscorea septemloba</i>  | JQ260302 |
| Monocotyledons | Melanthiaceae | <i>Veratrum</i>  | <i>Veratrum viride</i>       | JF807784 |
| Monocotyledons | Melanthiaceae | <i>Veratrum</i>  | <i>Veratrum viride</i>       | JF807785 |
| Monocotyledons | Cyperaceae    | <i>Cyperus</i>   | <i>Cyperus involucratus</i>  | GU135417 |
| Monocotyledons | Cyperaceae    | <i>Cyperus</i>   | <i>Cyperus involucratus</i>  | GU135444 |
| Monocotyledons | Liliaceae     | <i>Lilium</i>    | <i>Lilium pumilum</i>        | HM053713 |
| Monocotyledons | Liliaceae     | <i>Lilium</i>    | <i>Lilium pumilum</i>        | HM053714 |
| Monocotyledons | Liliaceae     | <i>Lilium</i>    | <i>Lilium pumilum</i>        | HM053715 |
| Monocotyledons | Liliaceae     | <i>Lilium</i>    | <i>Lilium pumilum</i>        | HM053716 |
| Monocotyledons | Liliaceae     | <i>Lilium</i>    | <i>Lilium pumilum</i>        | HM053717 |
| Monocotyledons | Liliaceae     | <i>Lilium</i>    | <i>Lilium pumilum</i>        | HM053718 |
| Monocotyledons | Liliaceae     | <i>Lilium</i>    | <i>Lilium pumilum</i>        | HM053719 |
| Monocotyledons | Liliaceae     | <i>Lilium</i>    | <i>Lilium pumilum</i>        | HM053720 |
| Monocotyledons | Liliaceae     | <i>Lilium</i>    | <i>Lilium pumilum</i>        | HM053721 |
| Monocotyledons | Liliaceae     | <i>Lilium</i>    | <i>Lilium pumilum</i>        | HM053722 |
| Monocotyledons | Liliaceae     | <i>Lilium</i>    | <i>Lilium pumilum</i>        | GQ434916 |
| Monocotyledons | Melanthiaceae | <i>Trillium</i>  | <i>Trillium ovatum</i>       | DQ404228 |

|                |                |                  |                                  |          |
|----------------|----------------|------------------|----------------------------------|----------|
| Monocotyledons | Melanthiaceae  | <i>Trillium</i>  | <i>Trillium ovatum</i>           | AY727187 |
| Monocotyledons | Melanthiaceae  | <i>Paris</i>     | <i>Paris fargesii</i>            | DQ404251 |
| Monocotyledons | Melanthiaceae  | <i>Paris</i>     | <i>Paris fargesii</i>            | JN045717 |
| Monocotyledons | Melanthiaceae  | <i>Paris</i>     | <i>Paris fargesii</i>            | JN045718 |
| Monocotyledons | Melanthiaceae  | <i>Paris</i>     | <i>Paris fargesii</i>            | JN045719 |
| Monocotyledons | Melanthiaceae  | <i>Paris</i>     | <i>Paris fargesii</i>            | JN045720 |
| Monocotyledons | Melanthiaceae  | <i>Paris</i>     | <i>Paris fargesii</i>            | JN045721 |
| Monocotyledons | Melanthiaceae  | <i>Paris</i>     | <i>Paris fargesii</i>            | JN045722 |
| Monocotyledons | Melanthiaceae  | <i>Paris</i>     | <i>Paris thibetica</i>           | DQ404250 |
| Monocotyledons | Melanthiaceae  | <i>Paris</i>     | <i>Paris thibetica</i>           | JN045763 |
| Monocotyledons | Melanthiaceae  | <i>Paris</i>     | <i>Paris thibetica</i>           | JN045764 |
| Monocotyledons | Melanthiaceae  | <i>Paris</i>     | <i>Paris thibetica</i>           | JN045765 |
| Monocotyledons | Melanthiaceae  | <i>Paris</i>     | <i>Paris thibetica</i>           | JN045766 |
| Monocotyledons | Melanthiaceae  | <i>Paris</i>     | <i>Paris thibetica</i>           | JN045767 |
| Monocotyledons | Melanthiaceae  | <i>Paris</i>     | <i>Paris thibetica</i>           | JN045768 |
| Monocotyledons | Melanthiaceae  | <i>Paris</i>     | <i>Paris thibetica</i>           | JN045769 |
| Monocotyledons | Melanthiaceae  | <i>Paris</i>     | <i>Paris thibetica</i>           | JN045770 |
| Monocotyledons | Melanthiaceae  | <i>Paris</i>     | <i>Paris thibetica</i>           | JN045771 |
| Monocotyledons | Melanthiaceae  | <i>Paris</i>     | <i>Paris incompleta</i>          | DQ404237 |
| Monocotyledons | Melanthiaceae  | <i>Paris</i>     | <i>Paris incompleta</i>          | JN045723 |
| Monocotyledons | Melanthiaceae  | <i>Paris</i>     | <i>Paris incompleta</i>          | JN045724 |
| Monocotyledons | Melanthiaceae  | <i>Paris</i>     | <i>Paris incompleta</i>          | JN045725 |
| Monocotyledons | Liliaceae      | <i>Lilium</i>    | <i>Lilium philadelphicum</i>     | DQ122704 |
| Monocotyledons | Liliaceae      | <i>Lilium</i>    | <i>Lilium philadelphicum</i>     | DQ122705 |
| Monocotyledons | Liliaceae      | <i>Lilium</i>    | <i>Lilium philadelphicum</i>     | DQ122706 |
| Monocotyledons | Liliaceae      | <i>Lilium</i>    | <i>Lilium philadelphicum</i>     | DQ122707 |
| Monocotyledons | Liliaceae      | <i>Lilium</i>    | <i>Lilium philadelphicum</i>     | DQ122708 |
| Monocotyledons | Liliaceae      | <i>Lilium</i>    | <i>Lilium philadelphicum</i>     | DQ122709 |
| Monocotyledons | Liliaceae      | <i>Lilium</i>    | <i>Lilium philadelphicum</i>     | DQ122710 |
| Monocotyledons | Liliaceae      | <i>Lilium</i>    | <i>Lilium philadelphicum</i>     | DQ122711 |
| Monocotyledons | Liliaceae      | <i>Lilium</i>    | <i>Lilium philadelphicum</i>     | DQ122712 |
| Monocotyledons | Liliaceae      | <i>Lilium</i>    | <i>Lilium philadelphicum</i>     | DQ122713 |
| Monocotyledons | Liliaceae      | <i>Lilium</i>    | <i>Lilium philadelphicum</i>     | DQ122714 |
| Monocotyledons | Liliaceae      | <i>Lilium</i>    | <i>Lilium philadelphicum</i>     | DQ122715 |
| Monocotyledons | Liliaceae      | <i>Lilium</i>    | <i>Lilium philadelphicum</i>     | DQ122716 |
| Monocotyledons | Liliaceae      | <i>Lilium</i>    | <i>Lilium philadelphicum</i>     | DQ122717 |
| Monocotyledons | Liliaceae      | <i>Lilium</i>    | <i>Lilium philadelphicum</i>     | DQ122718 |
| Monocotyledons | Liliaceae      | <i>Lilium</i>    | <i>Lilium philadelphicum</i>     | DQ122719 |
| Monocotyledons | Liliaceae      | <i>Lilium</i>    | <i>Lilium philadelphicum</i>     | DQ122720 |
| Monocotyledons | Amaryllidaceae | <i>Allium</i>    | <i>Allium macrostemon</i>        | GQ434917 |
| Monocotyledons | Amaryllidaceae | <i>Allium</i>    | <i>Allium macrostemon</i>        | GQ434918 |
| Monocotyledons | Amaryllidaceae | <i>Allium</i>    | <i>Allium macrostemon</i>        | GQ434919 |
| Monocotyledons | Poaceae        | <i>Festuca</i>   | <i>Festuca idahoensis</i>        | DQ369764 |
| Monocotyledons | Poaceae        | <i>Festuca</i>   | <i>Festuca idahoensis</i>        | DQ369766 |
| Monocotyledons | Poaceae        | <i>Festuca</i>   | <i>Festuca idahoensis</i>        | DQ369770 |
| Monocotyledons | Poaceae        | <i>Festuca</i>   | <i>Festuca idahoensis</i>        | DQ369774 |
| Monocotyledons | Poaceae        | <i>Festuca</i>   | <i>Festuca idahoensis</i>        | DQ369778 |
| Monocotyledons | Poaceae        | <i>Festuca</i>   | <i>Festuca valesiaca</i>         | DQ369758 |
| Monocotyledons | Poaceae        | <i>Festuca</i>   | <i>Festuca valesiaca</i>         | DQ369776 |
| Monocotyledons | Asparagaceae   | <i>Asparagus</i> | <i>Asparagus cochinchinensis</i> | GQ434909 |
| Monocotyledons | Asparagaceae   | <i>Asparagus</i> | <i>Asparagus cochinchinensis</i> | GQ434910 |
| Monocotyledons | Asparagaceae   | <i>Asparagus</i> | <i>Asparagus cochinchinensis</i> | GQ434911 |
| Monocotyledons | Poaceae        | <i>Kengyilia</i> | <i>Kengyilia rigidula</i>        | JN045115 |



|                |         |                  |                               |          |
|----------------|---------|------------------|-------------------------------|----------|
| Monocotyledons | Poaceae | <i>Kengyilia</i> | <i>Kengyilia rigidula</i>     | JN045116 |
| Monocotyledons | Poaceae | <i>Kengyilia</i> | <i>Kengyilia rigidula</i>     | JN045117 |
| Monocotyledons | Poaceae | <i>Kengyilia</i> | <i>Kengyilia rigidula</i>     | HQ221838 |
| Monocotyledons | Poaceae | <i>Kengyilia</i> | <i>Kengyilia rigidula</i>     | HQ221841 |
| Monocotyledons | Poaceae | <i>Kengyilia</i> | <i>Kengyilia rigidula</i>     | HQ221848 |
| Monocotyledons | Poaceae | <i>Kengyilia</i> | <i>Kengyilia rigidula</i>     | HQ221849 |
| Monocotyledons | Poaceae | <i>Kengyilia</i> | <i>Kengyilia rigidula</i>     | HQ221850 |
| Monocotyledons | Poaceae | <i>Kengyilia</i> | <i>Kengyilia rigidula</i>     | HQ652818 |
| Monocotyledons | Poaceae | <i>Kengyilia</i> | <i>Kengyilia rigidula</i>     | HQ652819 |
| Monocotyledons | Poaceae | <i>Kengyilia</i> | <i>Kengyilia rigidula</i>     | HQ652826 |
| Monocotyledons | Poaceae | <i>Kengyilia</i> | <i>Kengyilia rigidula</i>     | HQ652827 |
| Monocotyledons | Poaceae | <i>Kengyilia</i> | <i>Kengyilia rigidula</i>     | HQ652830 |
| Monocotyledons | Poaceae | <i>Kengyilia</i> | <i>Kengyilia rigidula</i>     | HQ652831 |
| Monocotyledons | Poaceae | <i>Kengyilia</i> | <i>Kengyilia rigidula</i>     | HQ652833 |
| Monocotyledons | Poaceae | <i>Kengyilia</i> | <i>Kengyilia grandiglumis</i> | JN045092 |
| Monocotyledons | Poaceae | <i>Kengyilia</i> | <i>Kengyilia grandiglumis</i> | JN045093 |
| Monocotyledons | Poaceae | <i>Kengyilia</i> | <i>Kengyilia grandiglumis</i> | JN045094 |
| Monocotyledons | Poaceae | <i>Kengyilia</i> | <i>Kengyilia grandiglumis</i> | HQ652811 |
| Monocotyledons | Poaceae | <i>Kengyilia</i> | <i>Kengyilia grandiglumis</i> | HQ652829 |
| Monocotyledons | Poaceae | <i>Kengyilia</i> | <i>Kengyilia grandiglumis</i> | HQ652851 |
| Monocotyledons | Poaceae | <i>Kengyilia</i> | <i>Kengyilia kokonorica</i>   | JN045098 |
| Monocotyledons | Poaceae | <i>Kengyilia</i> | <i>Kengyilia kokonorica</i>   | JN045099 |
| Monocotyledons | Poaceae | <i>Kengyilia</i> | <i>Kengyilia kokonorica</i>   | JN045100 |
| Monocotyledons | Poaceae | <i>Kengyilia</i> | <i>Kengyilia kokonorica</i>   | JN045101 |
| Monocotyledons | Poaceae | <i>Kengyilia</i> | <i>Kengyilia kokonorica</i>   | HQ652832 |
| Monocotyledons | Poaceae | <i>Kengyilia</i> | <i>Kengyilia kokonorica</i>   | HQ652834 |
| Monocotyledons | Poaceae | <i>Kengyilia</i> | <i>Kengyilia kokonorica</i>   | HQ652857 |
| Monocotyledons | Poaceae | <i>Kengyilia</i> | <i>Kengyilia kokonorica</i>   | HQ652858 |
| Monocotyledons | Poaceae | <i>Kengyilia</i> | <i>Kengyilia laxiflora</i>    | JN045102 |
| Monocotyledons | Poaceae | <i>Kengyilia</i> | <i>Kengyilia laxiflora</i>    | JN045103 |
| Monocotyledons | Poaceae | <i>Kengyilia</i> | <i>Kengyilia laxiflora</i>    | JN045104 |
| Monocotyledons | Poaceae | <i>Kengyilia</i> | <i>Kengyilia laxiflora</i>    | HQ652835 |
| Monocotyledons | Poaceae | <i>Kengyilia</i> | <i>Kengyilia laxiflora</i>    | HQ652836 |
| Monocotyledons | Poaceae | <i>Kengyilia</i> | <i>Kengyilia laxiflora</i>    | HQ652859 |
| Monocotyledons | Poaceae | <i>Kengyilia</i> | <i>Kengyilia melanthera</i>   | JN045108 |
| Monocotyledons | Poaceae | <i>Kengyilia</i> | <i>Kengyilia melanthera</i>   | JN045109 |
| Monocotyledons | Poaceae | <i>Kengyilia</i> | <i>Kengyilia melanthera</i>   | JN045110 |
| Monocotyledons | Poaceae | <i>Kengyilia</i> | <i>Kengyilia melanthera</i>   | HQ221839 |
| Monocotyledons | Poaceae | <i>Kengyilia</i> | <i>Kengyilia melanthera</i>   | HQ221840 |
| Monocotyledons | Poaceae | <i>Kengyilia</i> | <i>Kengyilia melanthera</i>   | HQ221843 |
| Monocotyledons | Poaceae | <i>Kengyilia</i> | <i>Kengyilia melanthera</i>   | HQ221844 |
| Monocotyledons | Poaceae | <i>Kengyilia</i> | <i>Kengyilia melanthera</i>   | HQ221846 |
| Monocotyledons | Poaceae | <i>Kengyilia</i> | <i>Kengyilia melanthera</i>   | HQ652801 |
| Monocotyledons | Poaceae | <i>Kengyilia</i> | <i>Kengyilia melanthera</i>   | HQ652810 |
| Monocotyledons | Poaceae | <i>Kengyilia</i> | <i>Kengyilia melanthera</i>   | HQ652864 |
| Monocotyledons | Poaceae | <i>Kengyilia</i> | <i>Kengyilia melanthera</i>   | HQ652865 |
| Monocotyledons | Poaceae | <i>Kengyilia</i> | <i>Kengyilia melanthera</i>   | HQ652866 |
| Monocotyledons | Poaceae | <i>Kengyilia</i> | <i>Kengyilia mutica</i>       | JN045113 |
| Monocotyledons | Poaceae | <i>Kengyilia</i> | <i>Kengyilia mutica</i>       | JN045114 |
| Monocotyledons | Poaceae | <i>Kengyilia</i> | <i>Kengyilia mutica</i>       | HQ652823 |
| Monocotyledons | Poaceae | <i>Kengyilia</i> | <i>Kengyilia mutica</i>       | HQ652825 |
| Monocotyledons | Poaceae | <i>Kengyilia</i> | <i>Kengyilia mutica</i>       | HQ652867 |
| Monocotyledons | Poaceae | <i>Kengyilia</i> | <i>Kengyilia thoroldiana</i>  | JN045121 |

|                |                |                    |                              |          |
|----------------|----------------|--------------------|------------------------------|----------|
| Monocotyledons | Poaceae        | <i>Kengyilia</i>   | <i>Kengyilia thoroldiana</i> | JN045122 |
| Monocotyledons | Poaceae        | <i>Kengyilia</i>   | <i>Kengyilia thoroldiana</i> | JN045123 |
| Monocotyledons | Poaceae        | <i>Kengyilia</i>   | <i>Kengyilia thoroldiana</i> | HQ652814 |
| Monocotyledons | Poaceae        | <i>Kengyilia</i>   | <i>Kengyilia thoroldiana</i> | HQ652815 |
| Monocotyledons | Poaceae        | <i>Kengyilia</i>   | <i>Kengyilia thoroldiana</i> | HQ652816 |
| Monocotyledons | Poaceae        | <i>Kengyilia</i>   | <i>Kengyilia thoroldiana</i> | HQ652824 |
| Monocotyledons | Poaceae        | <i>Kengyilia</i>   | <i>Kengyilia batalinii</i>   | JN045085 |
| Monocotyledons | Poaceae        | <i>Kengyilia</i>   | <i>Kengyilia batalinii</i>   | JN045086 |
| Monocotyledons | Poaceae        | <i>Kengyilia</i>   | <i>Kengyilia batalinii</i>   | JN045087 |
| Monocotyledons | Poaceae        | <i>Kengyilia</i>   | <i>Kengyilia batalinii</i>   | HQ652843 |
| Monocotyledons | Poaceae        | <i>Kengyilia</i>   | <i>Kengyilia batalinii</i>   | HQ652844 |
| Monocotyledons | Poaceae        | <i>Kengyilia</i>   | <i>Kengyilia batalinii</i>   | HQ652845 |
| Monocotyledons | Poaceae        | <i>Kengyilia</i>   | <i>Kengyilia batalinii</i>   | HQ652846 |
| Monocotyledons | Musaceae       | <i>Musa</i>        | <i>Musa basjoo</i>           | FJ871913 |
| Monocotyledons | Musaceae       | <i>Musa</i>        | <i>Musa basjoo</i>           | FJ871914 |
| Monocotyledons | Musaceae       | <i>Musa</i>        | <i>Musa basjoo</i>           | JN045497 |
| Monocotyledons | Musaceae       | <i>Musa</i>        | <i>Musa basjoo</i>           | JN045498 |
| Monocotyledons | Musaceae       | <i>Musa</i>        | <i>Musa basjoo</i>           | JN045499 |
| Monocotyledons | Amaryllidaceae | <i>Allium</i>      | <i>Allium przewalskianum</i> | GU121988 |
| Monocotyledons | Amaryllidaceae | <i>Allium</i>      | <i>Allium przewalskianum</i> | GU121989 |
| Monocotyledons | Amaryllidaceae | <i>Allium</i>      | <i>Allium przewalskianum</i> | GU121990 |
| Monocotyledons | Amaryllidaceae | <i>Allium</i>      | <i>Allium przewalskianum</i> | GU121991 |
| Monocotyledons | Dioscoreaceae  | <i>Dioscorea</i>   | <i>Dioscorea decipiens</i>   | JQ260396 |
| Monocotyledons | Dioscoreaceae  | <i>Dioscorea</i>   | <i>Dioscorea decipiens</i>   | JQ260397 |
| Monocotyledons | Dioscoreaceae  | <i>Dioscorea</i>   | <i>Dioscorea decipiens</i>   | JQ260398 |
| Monocotyledons | Dioscoreaceae  | <i>Dioscorea</i>   | <i>Dioscorea decipiens</i>   | JQ260399 |
| Monocotyledons | Dioscoreaceae  | <i>Dioscorea</i>   | <i>Dioscorea glabra</i>      | JQ260372 |
| Monocotyledons | Dioscoreaceae  | <i>Dioscorea</i>   | <i>Dioscorea glabra</i>      | JQ260373 |
| Monocotyledons | Dioscoreaceae  | <i>Dioscorea</i>   | <i>Dioscorea glabra</i>      | JQ260374 |
| Monocotyledons | Dioscoreaceae  | <i>Dioscorea</i>   | <i>Dioscorea hispida</i>     | JQ260341 |
| Monocotyledons | Dioscoreaceae  | <i>Dioscorea</i>   | <i>Dioscorea hispida</i>     | JQ260342 |
| Monocotyledons | Dioscoreaceae  | <i>Dioscorea</i>   | <i>Dioscorea pentaphylla</i> | JQ260336 |
| Monocotyledons | Dioscoreaceae  | <i>Dioscorea</i>   | <i>Dioscorea pentaphylla</i> | JQ260337 |
| Monocotyledons | Dioscoreaceae  | <i>Dioscorea</i>   | <i>Dioscorea pentaphylla</i> | JQ260338 |
| Monocotyledons | Dioscoreaceae  | <i>Dioscorea</i>   | <i>Dioscorea pentaphylla</i> | JQ260339 |
| Monocotyledons | Musaceae       | <i>Musa</i>        | <i>Musa beccarii</i>         | FJ871905 |
| Monocotyledons | Musaceae       | <i>Musa</i>        | <i>Musa beccarii</i>         | FJ871906 |
| Monocotyledons | Liliaceae      | <i>Erythronium</i> | <i>Erythronium elegans</i>   | EU311877 |
| Monocotyledons | Liliaceae      | <i>Erythronium</i> | <i>Erythronium elegans</i>   | EU311878 |
| Monocotyledons | Liliaceae      | <i>Erythronium</i> | <i>Erythronium elegans</i>   | EU311879 |
| Monocotyledons | Liliaceae      | <i>Erythronium</i> | <i>Erythronium elegans</i>   | EU311880 |
| Monocotyledons | Liliaceae      | <i>Erythronium</i> | <i>Erythronium elegans</i>   | EU311881 |
| Monocotyledons | Liliaceae      | <i>Erythronium</i> | <i>Erythronium elegans</i>   | EU311882 |
| Monocotyledons | Liliaceae      | <i>Erythronium</i> | <i>Erythronium elegans</i>   | EU311883 |
| Monocotyledons | Liliaceae      | <i>Erythronium</i> | <i>Erythronium elegans</i>   | EU311884 |
| Monocotyledons | Liliaceae      | <i>Erythronium</i> | <i>Erythronium elegans</i>   | EU311885 |
| Monocotyledons | Liliaceae      | <i>Erythronium</i> | <i>Erythronium elegans</i>   | EU311886 |
| Monocotyledons | Liliaceae      | <i>Erythronium</i> | <i>Erythronium elegans</i>   | EU311887 |
| Monocotyledons | Liliaceae      | <i>Erythronium</i> | <i>Erythronium elegans</i>   | EU311888 |
| Monocotyledons | Liliaceae      | <i>Erythronium</i> | <i>Erythronium elegans</i>   | EU311889 |
| Monocotyledons | Liliaceae      | <i>Erythronium</i> | <i>Erythronium elegans</i>   | EU311890 |
| Monocotyledons | Liliaceae      | <i>Erythronium</i> | <i>Erythronium elegans</i>   | EU311891 |
| Monocotyledons | Liliaceae      | <i>Erythronium</i> | <i>Erythronium elegans</i>   | EU311892 |

|                |               |                     |                                   |          |
|----------------|---------------|---------------------|-----------------------------------|----------|
| Monocotyledons | Liliaceae     | <i>Erythronium</i>  | <i>Erythronium klamathense</i>    | EU311852 |
| Monocotyledons | Liliaceae     | <i>Erythronium</i>  | <i>Erythronium klamathense</i>    | EU311853 |
| Monocotyledons | Liliaceae     | <i>Erythronium</i>  | <i>Erythronium montanum</i>       | EU311854 |
| Monocotyledons | Liliaceae     | <i>Erythronium</i>  | <i>Erythronium montanum</i>       | EU311855 |
| Monocotyledons | Liliaceae     | <i>Erythronium</i>  | <i>Erythronium montanum</i>       | EU311856 |
| Monocotyledons | Liliaceae     | <i>Erythronium</i>  | <i>Erythronium montanum</i>       | EU311857 |
| Monocotyledons | Liliaceae     | <i>Erythronium</i>  | <i>Erythronium montanum</i>       | EU311858 |
| Monocotyledons | Liliaceae     | <i>Erythronium</i>  | <i>Erythronium montanum</i>       | EU311859 |
| Monocotyledons | Liliaceae     | <i>Erythronium</i>  | <i>Erythronium montanum</i>       | EU311860 |
| Monocotyledons | Liliaceae     | <i>Erythronium</i>  | <i>Erythronium montanum</i>       | EU311861 |
| Monocotyledons | Liliaceae     | <i>Erythronium</i>  | <i>Erythronium oregonum</i>       | EU311862 |
| Monocotyledons | Liliaceae     | <i>Erythronium</i>  | <i>Erythronium oregonum</i>       | EU311863 |
| Monocotyledons | Liliaceae     | <i>Erythronium</i>  | <i>Erythronium oregonum</i>       | EU311864 |
| Monocotyledons | Liliaceae     | <i>Erythronium</i>  | <i>Erythronium oregonum</i>       | EU311865 |
| Monocotyledons | Liliaceae     | <i>Erythronium</i>  | <i>Erythronium oregonum</i>       | EU311866 |
| Monocotyledons | Liliaceae     | <i>Erythronium</i>  | <i>Erythronium oregonum</i>       | EU311867 |
| Monocotyledons | Liliaceae     | <i>Erythronium</i>  | <i>Erythronium quinaultense</i>   | EU311893 |
| Monocotyledons | Liliaceae     | <i>Erythronium</i>  | <i>Erythronium quinaultense</i>   | EU311894 |
| Monocotyledons | Liliaceae     | <i>Erythronium</i>  | <i>Erythronium quinaultense</i>   | EU311895 |
| Monocotyledons | Liliaceae     | <i>Erythronium</i>  | <i>Erythronium quinaultense</i>   | EU311896 |
| Monocotyledons | Liliaceae     | <i>Erythronium</i>  | <i>Erythronium quinaultense</i>   | EU311897 |
| Monocotyledons | Liliaceae     | <i>Erythronium</i>  | <i>Erythronium quinaultense</i>   | EU311898 |
| Monocotyledons | Liliaceae     | <i>Erythronium</i>  | <i>Erythronium quinaultense</i>   | EU311899 |
| Monocotyledons | Liliaceae     | <i>Erythronium</i>  | <i>Erythronium revolutum</i>      | EU311868 |
| Monocotyledons | Liliaceae     | <i>Erythronium</i>  | <i>Erythronium revolutum</i>      | EU311869 |
| Monocotyledons | Liliaceae     | <i>Erythronium</i>  | <i>Erythronium revolutum</i>      | EU311870 |
| Monocotyledons | Liliaceae     | <i>Erythronium</i>  | <i>Erythronium revolutum</i>      | EU311871 |
| Monocotyledons | Liliaceae     | <i>Erythronium</i>  | <i>Erythronium revolutum</i>      | EU311872 |
| Monocotyledons | Liliaceae     | <i>Erythronium</i>  | <i>Erythronium revolutum</i>      | EU311873 |
| Monocotyledons | Liliaceae     | <i>Erythronium</i>  | <i>Erythronium revolutum</i>      | EU311874 |
| Monocotyledons | Liliaceae     | <i>Erythronium</i>  | <i>Erythronium revolutum</i>      | EU311875 |
| Monocotyledons | Liliaceae     | <i>Erythronium</i>  | <i>Erythronium revolutum</i>      | EU311876 |
| Monocotyledons | Melanthiaceae | <i>Veratrum</i>     | <i>Veratrum nigrum</i>            | GQ434892 |
| Monocotyledons | Melanthiaceae | <i>Veratrum</i>     | <i>Veratrum nigrum</i>            | FN675816 |
| Monocotyledons | Colchicaceae  | <i>Androcymbium</i> | <i>Androcymbium austrocapense</i> | DQ088279 |
| Monocotyledons | Colchicaceae  | <i>Androcymbium</i> | <i>Androcymbium austrocapense</i> | DQ088280 |
| Monocotyledons | Melanthiaceae | <i>Paris</i>        | <i>Paris cronquistii</i>          | JN045701 |
| Monocotyledons | Melanthiaceae | <i>Paris</i>        | <i>Paris cronquistii</i>          | JN045702 |
| Monocotyledons | Melanthiaceae | <i>Paris</i>        | <i>Paris cronquistii</i>          | JN045703 |
| Monocotyledons | Melanthiaceae | <i>Paris</i>        | <i>Paris daliensis</i>            | DQ404260 |
| Monocotyledons | Melanthiaceae | <i>Paris</i>        | <i>Paris daliensis</i>            | JN045704 |
| Monocotyledons | Melanthiaceae | <i>Paris</i>        | <i>Paris daliensis</i>            | JN045705 |
| Monocotyledons | Melanthiaceae | <i>Paris</i>        | <i>Paris luquanensis</i>          | GU178892 |
| Monocotyledons | Melanthiaceae | <i>Paris</i>        | <i>Paris luquanensis</i>          | JN045726 |
| Monocotyledons | Melanthiaceae | <i>Paris</i>        | <i>Paris luquanensis</i>          | JN045727 |
| Monocotyledons | Melanthiaceae | <i>Paris</i>        | <i>Paris luquanensis</i>          | JN045728 |
| Monocotyledons | Melanthiaceae | <i>Paris</i>        | <i>Paris marmorata</i>            | DQ404256 |
| Monocotyledons | Melanthiaceae | <i>Paris</i>        | <i>Paris marmorata</i>            | GU178890 |
| Monocotyledons | Melanthiaceae | <i>Paris</i>        | <i>Paris marmorata</i>            | JN045735 |
| Monocotyledons | Melanthiaceae | <i>Paris</i>        | <i>Paris marmorata</i>            | JN045736 |
| Monocotyledons | Melanthiaceae | <i>Paris</i>        | <i>Paris marmorata</i>            | JN045737 |
| Monocotyledons | Melanthiaceae | <i>Paris</i>        | <i>Paris marmorata</i>            | JN045738 |
| Monocotyledons | Melanthiaceae | <i>Paris</i>        | <i>Paris marmorata</i>            | JN045739 |

|                |               |                     |                                |          |
|----------------|---------------|---------------------|--------------------------------|----------|
| Monocotyledons | Araceae       | <i>Arisaema</i>     | <i>Arisaema flavum</i>         | JN043994 |
| Monocotyledons | Araceae       | <i>Arisaema</i>     | <i>Arisaema flavum</i>         | JN043995 |
| Monocotyledons | Araceae       | <i>Arisaema</i>     | <i>Arisaema heterophyllum</i>  | JN043996 |
| Monocotyledons | Araceae       | <i>Arisaema</i>     | <i>Arisaema heterophyllum</i>  | JN043997 |
| Monocotyledons | Araceae       | <i>Arisaema</i>     | <i>Arisaema heterophyllum</i>  | JN043998 |
| Monocotyledons | Araceae       | <i>Arisaema</i>     | <i>Arisaema rhizomatum</i>     | JN043999 |
| Monocotyledons | Araceae       | <i>Arisaema</i>     | <i>Arisaema rhizomatum</i>     | JN044000 |
| Monocotyledons | Musaceae      | <i>Musa</i>         | <i>Musa velutina</i>           | FJ871917 |
| Monocotyledons | Musaceae      | <i>Musa</i>         | <i>Musa velutina</i>           | FJ871918 |
| Monocotyledons | Musaceae      | <i>Musa</i>         | <i>Musa textilis</i>           | FJ871896 |
| Monocotyledons | Musaceae      | <i>Musa</i>         | <i>Musa textilis</i>           | FJ871897 |
| Monocotyledons | Musaceae      | <i>Musa</i>         | <i>Musa textilis</i>           | FJ871898 |
| Monocotyledons | Araceae       | <i>Arisaema</i>     | <i>Arisaema erubescens</i>     | JN043992 |
| Monocotyledons | Araceae       | <i>Arisaema</i>     | <i>Arisaema erubescens</i>     | JN043993 |
| Monocotyledons | Melanthiaceae | <i>Paris</i>        | <i>Paris quadrifolia</i>       | DQ404238 |
| Monocotyledons | Melanthiaceae | <i>Paris</i>        | <i>Paris quadrifolia</i>       | JN045757 |
| Monocotyledons | Melanthiaceae | <i>Paris</i>        | <i>Paris quadrifolia</i>       | JN045758 |
| Monocotyledons | Melanthiaceae | <i>Paris</i>        | <i>Paris quadrifolia</i>       | JN045759 |
| Monocotyledons | Asparagaceae  | <i>Asparagus</i>    | <i>Asparagus densiflorus</i>   | HM990125 |
| Monocotyledons | Asparagaceae  | <i>Asparagus</i>    | <i>Asparagus densiflorus</i>   | HM990128 |
| Monocotyledons | Asparagaceae  | <i>Asparagus</i>    | <i>Asparagus densiflorus</i>   | HM990130 |
| Monocotyledons | Asparagaceae  | <i>Asparagus</i>    | <i>Asparagus densiflorus</i>   | HM990141 |
| Monocotyledons | Colchicaceae  | <i>Androcymbium</i> | <i>Androcymbium gramineum</i>  | DQ088292 |
| Monocotyledons | Colchicaceae  | <i>Androcymbium</i> | <i>Androcymbium gramineum</i>  | DQ088293 |
| Monocotyledons | Colchicaceae  | <i>Androcymbium</i> | <i>Androcymbium wyssianum</i>  | DQ088316 |
| Monocotyledons | Colchicaceae  | <i>Androcymbium</i> | <i>Androcymbium wyssianum</i>  | DQ088317 |
| Monocotyledons | Colchicaceae  | <i>Androcymbium</i> | <i>Androcymbium huntleyi</i>   | DQ088297 |
| Monocotyledons | Colchicaceae  | <i>Androcymbium</i> | <i>Androcymbium huntleyi</i>   | DQ088298 |
| Monocotyledons | Colchicaceae  | <i>Androcymbium</i> | <i>Androcymbium irroratum</i>  | DQ088299 |
| Monocotyledons | Colchicaceae  | <i>Androcymbium</i> | <i>Androcymbium irroratum</i>  | DQ088300 |
| Monocotyledons | Colchicaceae  | <i>Androcymbium</i> | <i>Androcymbium irroratum</i>  | DQ088301 |
| Monocotyledons | Colchicaceae  | <i>Androcymbium</i> | <i>Androcymbium irroratum</i>  | DQ088302 |
| Monocotyledons | Colchicaceae  | <i>Androcymbium</i> | <i>Androcymbium irroratum</i>  | DQ088303 |
| Monocotyledons | Colchicaceae  | <i>Androcymbium</i> | <i>Androcymbium poeltianum</i> | DQ088308 |
| Monocotyledons | Colchicaceae  | <i>Androcymbium</i> | <i>Androcymbium poeltianum</i> | DQ088309 |
| Monocotyledons | Bromeliaceae  | <i>Vriesea</i>      | <i>Vriesea carinata</i>        | JN204671 |
| Monocotyledons | Bromeliaceae  | <i>Vriesea</i>      | <i>Vriesea carinata</i>        | JN204672 |
| Monocotyledons | Dioscoreaceae | <i>Dioscorea</i>    | <i>Dioscorea cirrhosa</i>      | JQ260362 |
| Monocotyledons | Dioscoreaceae | <i>Dioscorea</i>    | <i>Dioscorea cirrhosa</i>      | JQ260363 |
| Monocotyledons | Dioscoreaceae | <i>Dioscorea</i>    | <i>Dioscorea cirrhosa</i>      | JQ260364 |
| Monocotyledons | Dioscoreaceae | <i>Dioscorea</i>    | <i>Dioscorea cirrhosa</i>      | JQ260365 |
| Monocotyledons | Dioscoreaceae | <i>Dioscorea</i>    | <i>Dioscorea cirrhosa</i>      | JQ260366 |
| Monocotyledons | Dioscoreaceae | <i>Dioscorea</i>    | <i>Dioscorea cirrhosa</i>      | JQ260367 |
| Monocotyledons | Dioscoreaceae | <i>Dioscorea</i>    | <i>Dioscorea cirrhosa</i>      | JQ260368 |
| Monocotyledons | Dioscoreaceae | <i>Dioscorea</i>    | <i>Dioscorea cirrhosa</i>      | JQ260369 |
| Monocotyledons | Dioscoreaceae | <i>Dioscorea</i>    | <i>Dioscorea cirrhosa</i>      | JQ260370 |
| Monocotyledons | Dioscoreaceae | <i>Dioscorea</i>    | <i>Dioscorea zingiberensis</i> | JQ260266 |
| Monocotyledons | Dioscoreaceae | <i>Dioscorea</i>    | <i>Dioscorea zingiberensis</i> | JQ260267 |
| Monocotyledons | Dioscoreaceae | <i>Dioscorea</i>    | <i>Dioscorea zingiberensis</i> | JQ260268 |
| Monocotyledons | Dioscoreaceae | <i>Dioscorea</i>    | <i>Dioscorea zingiberensis</i> | JQ260269 |
| Monocotyledons | Dioscoreaceae | <i>Dioscorea</i>    | <i>Dioscorea zingiberensis</i> | JQ260270 |
| Monocotyledons | Dioscoreaceae | <i>Dioscorea</i>    | <i>Dioscorea zingiberensis</i> | JQ260271 |
| Monocotyledons | Dioscoreaceae | <i>Dioscorea</i>    | <i>Dioscorea zingiberensis</i> | JQ260272 |

|                |               |                   |                                |          |
|----------------|---------------|-------------------|--------------------------------|----------|
| Monocotyledons | Dioscoreaceae | <i>Dioscorea</i>  | <i>Dioscorea zingiberensis</i> | JQ260273 |
| Monocotyledons | Dioscoreaceae | <i>Dioscorea</i>  | <i>Dioscorea zingiberensis</i> | JQ260274 |
| Monocotyledons | Dioscoreaceae | <i>Dioscorea</i>  | <i>Dioscorea zingiberensis</i> | JQ260275 |
| Monocotyledons | Dioscoreaceae | <i>Dioscorea</i>  | <i>Dioscorea zingiberensis</i> | DQ131104 |
| Monocotyledons | Dioscoreaceae | <i>Dioscorea</i>  | <i>Dioscorea zingiberensis</i> | DQ131105 |
| Monocotyledons | Dioscoreaceae | <i>Dioscorea</i>  | <i>Dioscorea zingiberensis</i> | DQ191746 |
| Monocotyledons | Dioscoreaceae | <i>Dioscorea</i>  | <i>Dioscorea zingiberensis</i> | DQ191747 |
| Monocotyledons | Dioscoreaceae | <i>Dioscorea</i>  | <i>Dioscorea zingiberensis</i> | DQ191748 |
| Monocotyledons | Dioscoreaceae | <i>Dioscorea</i>  | <i>Dioscorea zingiberensis</i> | DQ191749 |
| Monocotyledons | Bromeliaceae  | <i>Nidularium</i> | <i>Nidularium procerum</i>     | JN204655 |
| Monocotyledons | Bromeliaceae  | <i>Nidularium</i> | <i>Nidularium procerum</i>     | JN204656 |
| Monocotyledons | Dioscoreaceae | <i>Dioscorea</i>  | <i>Dioscorea panthaica</i>     | JQ260278 |
| Monocotyledons | Dioscoreaceae | <i>Dioscorea</i>  | <i>Dioscorea panthaica</i>     | JQ260279 |
| Monocotyledons | Dioscoreaceae | <i>Dioscorea</i>  | <i>Dioscorea panthaica</i>     | DQ098160 |
| Monocotyledons | Dioscoreaceae | <i>Dioscorea</i>  | <i>Dioscorea panthaica</i>     | DQ124704 |
| Monocotyledons | Dioscoreaceae | <i>Dioscorea</i>  | <i>Dioscorea panthaica</i>     | DQ124705 |
| Monocotyledons | Dioscoreaceae | <i>Dioscorea</i>  | <i>Dioscorea collettii</i>     | JQ260291 |
| Monocotyledons | Dioscoreaceae | <i>Dioscorea</i>  | <i>Dioscorea collettii</i>     | JQ260292 |
| Monocotyledons | Dioscoreaceae | <i>Dioscorea</i>  | <i>Dioscorea collettii</i>     | JQ260293 |
| Monocotyledons | Dioscoreaceae | <i>Dioscorea</i>  | <i>Dioscorea collettii</i>     | JQ260294 |
| Monocotyledons | Poaceae       | <i>Festuca</i>    | <i>Festuca roemeri</i>         | DQ369768 |
| Monocotyledons | Poaceae       | <i>Festuca</i>    | <i>Festuca roemeri</i>         | DQ369772 |
| Monocotyledons | Poaceae       | <i>Festuca</i>    | <i>Festuca roemeri</i>         | DQ369780 |
| Monocotyledons | Poaceae       | <i>Festuca</i>    | <i>Festuca roemeri</i>         | DQ369782 |
| Monocotyledons | Poaceae       | <i>Festuca</i>    | <i>Festuca roemeri</i>         | DQ369784 |
| Monocotyledons | Poaceae       | <i>Festuca</i>    | <i>Festuca roemeri</i>         | DQ369786 |
| Monocotyledons | Poaceae       | <i>Festuca</i>    | <i>Festuca roemeri</i>         | DQ369788 |
| Monocotyledons | Poaceae       | <i>Festuca</i>    | <i>Festuca roemeri</i>         | DQ369790 |
| Monocotyledons | Melanthiaceae | <i>Paris</i>      | <i>Paris delavayi</i>          | GU178891 |
| Monocotyledons | Melanthiaceae | <i>Paris</i>      | <i>Paris delavayi</i>          | JN045706 |
| Monocotyledons | Melanthiaceae | <i>Paris</i>      | <i>Paris delavayi</i>          | JN045707 |
| Monocotyledons | Melanthiaceae | <i>Paris</i>      | <i>Paris delavayi</i>          | JN045708 |
| Monocotyledons | Melanthiaceae | <i>Paris</i>      | <i>Paris delavayi</i>          | JN045709 |
| Monocotyledons | Melanthiaceae | <i>Paris</i>      | <i>Paris delavayi</i>          | JN045710 |
| Monocotyledons | Melanthiaceae | <i>Paris</i>      | <i>Paris delavayi</i>          | JN045711 |
| Monocotyledons | Melanthiaceae | <i>Paris</i>      | <i>Paris dulongensis</i>       | DQ404241 |
| Monocotyledons | Melanthiaceae | <i>Paris</i>      | <i>Paris dulongensis</i>       | JN045712 |
| Monocotyledons | Melanthiaceae | <i>Paris</i>      | <i>Paris dulongensis</i>       | JN045713 |
| Monocotyledons | Melanthiaceae | <i>Paris</i>      | <i>Paris dunniana</i>          | DQ404259 |
| Monocotyledons | Melanthiaceae | <i>Paris</i>      | <i>Paris dunniana</i>          | JN045714 |
| Monocotyledons | Melanthiaceae | <i>Paris</i>      | <i>Paris dunniana</i>          | JN045715 |
| Monocotyledons | Melanthiaceae | <i>Paris</i>      | <i>Paris dunniana</i>          | JN045716 |
| Monocotyledons | Melanthiaceae | <i>Paris</i>      | <i>Paris mairei</i>            | DQ404247 |
| Monocotyledons | Melanthiaceae | <i>Paris</i>      | <i>Paris mairei</i>            | JN045729 |
| Monocotyledons | Melanthiaceae | <i>Paris</i>      | <i>Paris mairei</i>            | JN045730 |
| Monocotyledons | Melanthiaceae | <i>Paris</i>      | <i>Paris mairei</i>            | JN045731 |
| Monocotyledons | Melanthiaceae | <i>Paris</i>      | <i>Paris mairei</i>            | JN045732 |
| Monocotyledons | Melanthiaceae | <i>Paris</i>      | <i>Paris mairei</i>            | JN045733 |
| Monocotyledons | Melanthiaceae | <i>Paris</i>      | <i>Paris mairei</i>            | JN045734 |
| Monocotyledons | Melanthiaceae | <i>Paris</i>      | <i>Paris rugosa</i>            | DQ404245 |
| Monocotyledons | Melanthiaceae | <i>Paris</i>      | <i>Paris rugosa</i>            | JN045760 |
| Monocotyledons | Melanthiaceae | <i>Paris</i>      | <i>Paris rugosa</i>            | JN045761 |
| Monocotyledons | Melanthiaceae | <i>Paris</i>      | <i>Paris rugosa</i>            | JN045762 |

|                |               |                  |                                |          |
|----------------|---------------|------------------|--------------------------------|----------|
| Monocotyledons | Melanthiaceae | <i>Paris</i>     | <i>Paris vaniotii</i>          | DQ404243 |
| Monocotyledons | Melanthiaceae | <i>Paris</i>     | <i>Paris vaniotii</i>          | JN045772 |
| Monocotyledons | Melanthiaceae | <i>Paris</i>     | <i>Paris vaniotii</i>          | JN045773 |
| Monocotyledons | Melanthiaceae | <i>Paris</i>     | <i>Paris vaniotii</i>          | JN045774 |
| Monocotyledons | Melanthiaceae | <i>Paris</i>     | <i>Paris vietnamensis</i>      | DQ404246 |
| Monocotyledons | Melanthiaceae | <i>Paris</i>     | <i>Paris vietnamensis</i>      | GU178893 |
| Monocotyledons | Melanthiaceae | <i>Paris</i>     | <i>Paris vietnamensis</i>      | JN045775 |
| Monocotyledons | Melanthiaceae | <i>Paris</i>     | <i>Paris vietnamensis</i>      | JN045776 |
| Monocotyledons | Melanthiaceae | <i>Paris</i>     | <i>Paris vietnamensis</i>      | JN045777 |
| Monocotyledons | Melanthiaceae | <i>Paris</i>     | <i>Paris vietnamensis</i>      | JN045778 |
| Monocotyledons | Melanthiaceae | <i>Paris</i>     | <i>Paris vietnamensis</i>      | JN045779 |
| Monocotyledons | Melanthiaceae | <i>Paris</i>     | <i>Paris vietnamensis</i>      | JN045780 |
| Monocotyledons | Dioscoreaceae | <i>Dioscorea</i> | <i>Dioscorea persimilis</i>    | JQ260379 |
| Monocotyledons | Dioscoreaceae | <i>Dioscorea</i> | <i>Dioscorea persimilis</i>    | JQ260380 |
| Monocotyledons | Dioscoreaceae | <i>Dioscorea</i> | <i>Dioscorea persimilis</i>    | JQ260381 |
| Monocotyledons | Dioscoreaceae | <i>Dioscorea</i> | <i>Dioscorea persimilis</i>    | JQ260382 |
| Monocotyledons | Dioscoreaceae | <i>Dioscorea</i> | <i>Dioscorea persimilis</i>    | JQ260383 |
| Monocotyledons | Dioscoreaceae | <i>Dioscorea</i> | <i>Dioscorea futschauensis</i> | JQ260299 |
| Monocotyledons | Dioscoreaceae | <i>Dioscorea</i> | <i>Dioscorea futschauensis</i> | JQ260300 |
| Monocotyledons | Dioscoreaceae | <i>Dioscorea</i> | <i>Dioscorea exalata</i>       | JQ260385 |
| Monocotyledons | Dioscoreaceae | <i>Dioscorea</i> | <i>Dioscorea exalata</i>       | JQ260386 |
| Monocotyledons | Dioscoreaceae | <i>Dioscorea</i> | <i>Dioscorea exalata</i>       | JQ260387 |
| Monocotyledons | Dioscoreaceae | <i>Dioscorea</i> | <i>Dioscorea exalata</i>       | JQ260388 |
| Monocotyledons | Dioscoreaceae | <i>Dioscorea</i> | <i>Dioscorea exalata</i>       | JQ260389 |
| Monocotyledons | Dioscoreaceae | <i>Dioscorea</i> | <i>Dioscorea exalata</i>       | JQ260390 |
| Monocotyledons | Dioscoreaceae | <i>Dioscorea</i> | <i>Dioscorea kamoonsensis</i>  | JQ260330 |
| Monocotyledons | Dioscoreaceae | <i>Dioscorea</i> | <i>Dioscorea kamoonsensis</i>  | JQ260331 |
| Monocotyledons | Dioscoreaceae | <i>Dioscorea</i> | <i>Dioscorea kamoonsensis</i>  | JQ260332 |
| Monocotyledons | Melanthiaceae | <i>Veratrum</i>  | <i>Veratrum oxysepalum</i>     | JF807759 |
| Monocotyledons | Melanthiaceae | <i>Veratrum</i>  | <i>Veratrum oxysepalum</i>     | JF807760 |
| Monocotyledons | Melanthiaceae | <i>Veratrum</i>  | <i>Veratrum oxysepalum</i>     | JF807761 |
| Monocotyledons | Melanthiaceae | <i>Veratrum</i>  | <i>Veratrum oxysepalum</i>     | JF807762 |
| Monocotyledons | Melanthiaceae | <i>Veratrum</i>  | <i>Veratrum oxysepalum</i>     | JF807763 |
| Monocotyledons | Melanthiaceae | <i>Veratrum</i>  | <i>Veratrum oxysepalum</i>     | JF807764 |
| Monocotyledons | Melanthiaceae | <i>Veratrum</i>  | <i>Veratrum oxysepalum</i>     | JF807765 |
| Monocotyledons | Melanthiaceae | <i>Veratrum</i>  | <i>Veratrum oxysepalum</i>     | JF807766 |
| Monocotyledons | Melanthiaceae | <i>Veratrum</i>  | <i>Veratrum oxysepalum</i>     | JF807767 |
| Monocotyledons | Melanthiaceae | <i>Veratrum</i>  | <i>Veratrum oxysepalum</i>     | JF807768 |
| Monocotyledons | Melanthiaceae | <i>Veratrum</i>  | <i>Veratrum oxysepalum</i>     | JF807769 |
| Monocotyledons | Melanthiaceae | <i>Veratrum</i>  | <i>Veratrum oxysepalum</i>     | JF807770 |
| Monocotyledons | Melanthiaceae | <i>Veratrum</i>  | <i>Veratrum oxysepalum</i>     | JF807771 |
| Monocotyledons | Dioscoreaceae | <i>Dioscorea</i> | <i>Dioscorea fordii</i>        | JQ260375 |
| Monocotyledons | Dioscoreaceae | <i>Dioscorea</i> | <i>Dioscorea fordii</i>        | JQ260376 |
| Monocotyledons | Dioscoreaceae | <i>Dioscorea</i> | <i>Dioscorea fordii</i>        | JQ260377 |
| Monocotyledons | Dioscoreaceae | <i>Dioscorea</i> | <i>Dioscorea fordii</i>        | JQ260378 |
| Monocotyledons | Poaceae       | <i>Kengyilia</i> | <i>Kengyilia gobicola</i>      | JN045090 |
| Monocotyledons | Poaceae       | <i>Kengyilia</i> | <i>Kengyilia gobicola</i>      | JN045091 |
| Monocotyledons | Poaceae       | <i>Kengyilia</i> | <i>Kengyilia gobicola</i>      | HQ652849 |
| Monocotyledons | Poaceae       | <i>Kengyilia</i> | <i>Kengyilia gobicola</i>      | HQ652850 |
| Monocotyledons | Poaceae       | <i>Kengyilia</i> | <i>Kengyilia hirsuta</i>       | JN045095 |
| Monocotyledons | Poaceae       | <i>Kengyilia</i> | <i>Kengyilia hirsuta</i>       | JN045096 |
| Monocotyledons | Poaceae       | <i>Kengyilia</i> | <i>Kengyilia hirsuta</i>       | JN045097 |
| Monocotyledons | Poaceae       | <i>Kengyilia</i> | <i>Kengyilia hirsuta</i>       | HQ652852 |

|                |               |                   |                                |          |
|----------------|---------------|-------------------|--------------------------------|----------|
| Monocotyledons | Poaceae       | <i>Kengyilia</i>  | <i>Kengyilia hirsuta</i>       | HQ652853 |
| Monocotyledons | Poaceae       | <i>Kengyilia</i>  | <i>Kengyilia hirsuta</i>       | HQ652854 |
| Monocotyledons | Poaceae       | <i>Kengyilia</i>  | <i>Kengyilia hirsuta</i>       | HQ652855 |
| Monocotyledons | Poaceae       | <i>Kengyilia</i>  | <i>Kengyilia longiglumis</i>   | JN045105 |
| Monocotyledons | Poaceae       | <i>Kengyilia</i>  | <i>Kengyilia longiglumis</i>   | JN045106 |
| Monocotyledons | Poaceae       | <i>Kengyilia</i>  | <i>Kengyilia longiglumis</i>   | JN045107 |
| Monocotyledons | Poaceae       | <i>Kengyilia</i>  | <i>Kengyilia longiglumis</i>   | HQ652791 |
| Monocotyledons | Poaceae       | <i>Kengyilia</i>  | <i>Kengyilia longiglumis</i>   | HQ652860 |
| Monocotyledons | Poaceae       | <i>Kengyilia</i>  | <i>Kengyilia longiglumis</i>   | HQ652861 |
| Monocotyledons | Poaceae       | <i>Kengyilia</i>  | <i>Kengyilia longiglumis</i>   | HQ652862 |
| Monocotyledons | Poaceae       | <i>Kengyilia</i>  | <i>Kengyilia longiglumis</i>   | HQ652863 |
| Monocotyledons | Poaceae       | <i>Kengyilia</i>  | <i>Kengyilia stenachyra</i>    | JN045118 |
| Monocotyledons | Poaceae       | <i>Kengyilia</i>  | <i>Kengyilia stenachyra</i>    | JN045119 |
| Monocotyledons | Poaceae       | <i>Kengyilia</i>  | <i>Kengyilia stenachyra</i>    | JN045120 |
| Monocotyledons | Poaceae       | <i>Kengyilia</i>  | <i>Kengyilia stenachyra</i>    | HQ652812 |
| Monocotyledons | Poaceae       | <i>Kengyilia</i>  | <i>Kengyilia stenachyra</i>    | HQ652820 |
| Monocotyledons | Poaceae       | <i>Kengyilia</i>  | <i>Kengyilia stenachyra</i>    | HQ652828 |
| Monocotyledons | Poaceae       | <i>Kengyilia</i>  | <i>Kengyilia tahelacana</i>    | HQ652813 |
| Monocotyledons | Poaceae       | <i>Kengyilia</i>  | <i>Kengyilia tahelacana</i>    | HQ652822 |
| Monocotyledons | Liliaceae     | <i>Lloydia</i>    | <i>Lloydia yunnanensis</i>     | AM493964 |
| Monocotyledons | Liliaceae     | <i>Lloydia</i>    | <i>Lloydia yunnanensis</i>     | EU939287 |
| Monocotyledons | Commelinaceae | <i>Commelina</i>  | <i>Commelina imberbis</i>      | GQ248271 |
| Monocotyledons | Commelinaceae | <i>Commelina</i>  | <i>Commelina imberbis</i>      | EF590681 |
| Monocotyledons | Heliconiaceae | <i>Heliconia</i>  | <i>Heliconia bihai</i>         | GQ248311 |
| Monocotyledons | Heliconiaceae | <i>Heliconia</i>  | <i>Heliconia bihai</i>         | EF590700 |
| Monocotyledons | Heliconiaceae | <i>Heliconia</i>  | <i>Heliconia caribaea</i>      | GQ248312 |
| Monocotyledons | Heliconiaceae | <i>Heliconia</i>  | <i>Heliconia caribaea</i>      | EF590701 |
| Monocotyledons | Dioscoreaceae | <i>Dioscorea</i>  | <i>Dioscorea nitens</i>        | JQ260314 |
| Monocotyledons | Dioscoreaceae | <i>Dioscorea</i>  | <i>Dioscorea nitens</i>        | JQ260315 |
| Monocotyledons | Dioscoreaceae | <i>Dioscorea</i>  | <i>Dioscorea nitens</i>        | JQ260316 |
| Monocotyledons | Dioscoreaceae | <i>Dioscorea</i>  | <i>Dioscorea subcalva</i>      | JQ260309 |
| Monocotyledons | Dioscoreaceae | <i>Dioscorea</i>  | <i>Dioscorea subcalva</i>      | JQ260310 |
| Monocotyledons | Dioscoreaceae | <i>Dioscorea</i>  | <i>Dioscorea subcalva</i>      | JQ260311 |
| Monocotyledons | Dioscoreaceae | <i>Dioscorea</i>  | <i>Dioscorea subcalva</i>      | JQ260312 |
| Monocotyledons | Melanthiaceae | <i>Veratrum</i>   | <i>Veratrum dolichopetalum</i> | JF807743 |
| Monocotyledons | Melanthiaceae | <i>Veratrum</i>   | <i>Veratrum dolichopetalum</i> | JF807744 |
| Monocotyledons | Melanthiaceae | <i>Veratrum</i>   | <i>Veratrum dolichopetalum</i> | JF807745 |
| Monocotyledons | Melanthiaceae | <i>Veratrum</i>   | <i>Veratrum dolichopetalum</i> | JF807746 |
| Monocotyledons | Melanthiaceae | <i>Veratrum</i>   | <i>Veratrum dolichopetalum</i> | JF807747 |
| Monocotyledons | Melanthiaceae | <i>Veratrum</i>   | <i>Veratrum dolichopetalum</i> | JF807748 |
| Monocotyledons | Melanthiaceae | <i>Veratrum</i>   | <i>Veratrum dolichopetalum</i> | JF807749 |
| Monocotyledons | Melanthiaceae | <i>Veratrum</i>   | <i>Veratrum dolichopetalum</i> | JF807750 |
| Monocotyledons | Melanthiaceae | <i>Veratrum</i>   | <i>Veratrum dolichopetalum</i> | JF807751 |
| Monocotyledons | Melanthiaceae | <i>Veratrum</i>   | <i>Veratrum dolichopetalum</i> | JF807752 |
| Monocotyledons | Melanthiaceae | <i>Veratrum</i>   | <i>Veratrum dolichopetalum</i> | JF807753 |
| Monocotyledons | Melanthiaceae | <i>Veratrum</i>   | <i>Veratrum dolichopetalum</i> | JF807754 |
| Monocotyledons | Melanthiaceae | <i>Veratrum</i>   | <i>Veratrum dolichopetalum</i> | JF807755 |
| Monocotyledons | Melanthiaceae | <i>Veratrum</i>   | <i>Veratrum dolichopetalum</i> | JF807756 |
| Monocotyledons | Melanthiaceae | <i>Veratrum</i>   | <i>Veratrum dolichopetalum</i> | JF807757 |
| Monocotyledons | Melanthiaceae | <i>Veratrum</i>   | <i>Veratrum dolichopetalum</i> | JF807758 |
| Monocotyledons | Poaceae       | <i>Amelichloa</i> | <i>Amelichloa brachychaeta</i> | EU204669 |
| Monocotyledons | Poaceae       | <i>Amelichloa</i> | <i>Amelichloa brachychaeta</i> | EU204670 |
| Monocotyledons | Poaceae       | <i>Amelichloa</i> | <i>Amelichloa brachychaeta</i> | EU204671 |

|                |             |                      |                                |          |
|----------------|-------------|----------------------|--------------------------------|----------|
| Monocotyledons | Poaceae     | <i>Amelichloa</i>    | <i>Amelichloa brachychaeta</i> | EU204672 |
| Monocotyledons | Poaceae     | <i>Amelichloa</i>    | <i>Amelichloa brachychaeta</i> | EU204673 |
| Monocotyledons | Poaceae     | <i>Amelichloa</i>    | <i>Amelichloa brachychaeta</i> | EU204674 |
| Monocotyledons | Poaceae     | <i>Amelichloa</i>    | <i>Amelichloa caudata</i>      | EU489241 |
| Monocotyledons | Poaceae     | <i>Amelichloa</i>    | <i>Amelichloa caudata</i>      | EU204675 |
| Monocotyledons | Poaceae     | <i>Amelichloa</i>    | <i>Amelichloa caudata</i>      | EU204676 |
| Monocotyledons | Poaceae     | <i>Amelichloa</i>    | <i>Amelichloa caudata</i>      | EU204677 |
| Monocotyledons | Poaceae     | <i>Amelichloa</i>    | <i>Amelichloa caudata</i>      | EU204678 |
| Monocotyledons | Poaceae     | <i>Amelichloa</i>    | <i>Amelichloa caudata</i>      | EU204679 |
| Monocotyledons | Poaceae     | <i>Amelichloa</i>    | <i>Amelichloa clandestina</i>  | EU489242 |
| Monocotyledons | Poaceae     | <i>Amelichloa</i>    | <i>Amelichloa clandestina</i>  | EU204680 |
| Monocotyledons | Poaceae     | <i>Amelichloa</i>    | <i>Amelichloa clandestina</i>  | EU204681 |
| Monocotyledons | Poaceae     | <i>Amelichloa</i>    | <i>Amelichloa clandestina</i>  | EU204682 |
| Monocotyledons | Poaceae     | <i>Amelichloa</i>    | <i>Amelichloa clandestina</i>  | EU204683 |
| Monocotyledons | Poaceae     | <i>Piptatherum</i>   | <i>Piptatherum holciforme</i>  | EU204755 |
| Monocotyledons | Poaceae     | <i>Piptatherum</i>   | <i>Piptatherum holciforme</i>  | EU204756 |
| Monocotyledons | Musaceae    | <i>Musa</i>          | <i>Musa campestris</i>         | FJ871907 |
| Monocotyledons | Musaceae    | <i>Musa</i>          | <i>Musa campestris</i>         | FJ871908 |
| Monocotyledons | Musaceae    | <i>Musa</i>          | <i>Musa coccinea</i>           | FJ871911 |
| Monocotyledons | Musaceae    | <i>Musa</i>          | <i>Musa coccinea</i>           | FJ871912 |
| Monocotyledons | Musaceae    | <i>Musa</i>          | <i>Musa itinerans</i>          | FJ871877 |
| Monocotyledons | Musaceae    | <i>Musa</i>          | <i>Musa itinerans</i>          | FJ871878 |
| Monocotyledons | Musaceae    | <i>Musa</i>          | <i>Musa itinerans</i>          | FJ871879 |
| Monocotyledons | Musaceae    | <i>Musa</i>          | <i>Musa itinerans</i>          | FJ871880 |
| Monocotyledons | Musaceae    | <i>Musa</i>          | <i>Musa itinerans</i>          | FJ871881 |
| Monocotyledons | Musaceae    | <i>Musa</i>          | <i>Musa itinerans</i>          | FJ871882 |
| Monocotyledons | Musaceae    | <i>Musa</i>          | <i>Musa itinerans</i>          | FJ871883 |
| Monocotyledons | Musaceae    | <i>Musa</i>          | <i>Musa itinerans</i>          | FJ871884 |
| Monocotyledons | Musaceae    | <i>Musa</i>          | <i>Musa lutea</i>              | FJ871909 |
| Monocotyledons | Musaceae    | <i>Musa</i>          | <i>Musa lutea</i>              | FJ871910 |
| Monocotyledons | Musaceae    | <i>Musa</i>          | <i>Musa maclayi</i>            | FJ871899 |
| Monocotyledons | Musaceae    | <i>Musa</i>          | <i>Musa maclayi</i>            | FJ871900 |
| Monocotyledons | Musaceae    | <i>Musa</i>          | <i>Musa maclayi</i>            | FJ871901 |
| Monocotyledons | Musaceae    | <i>Musa</i>          | <i>Musa nagensium</i>          | FJ871919 |
| Monocotyledons | Musaceae    | <i>Musa</i>          | <i>Musa nagensium</i>          | FJ871920 |
| Monocotyledons | Musaceae    | <i>Musa</i>          | <i>Musa rubinea</i>            | FJ871889 |
| Monocotyledons | Musaceae    | <i>Musa</i>          | <i>Musa rubinea</i>            | FJ871890 |
| Monocotyledons | Musaceae    | <i>Musa</i>          | <i>Musa rubinea</i>            | FJ871891 |
| Monocotyledons | Musaceae    | <i>Musa</i>          | <i>Musa rubinea</i>            | FJ871892 |
| Monocotyledons | Musaceae    | <i>Musa</i>          | <i>Musa yunnanensis</i>        | FJ871885 |
| Monocotyledons | Musaceae    | <i>Musa</i>          | <i>Musa yunnanensis</i>        | FJ871886 |
| Monocotyledons | Musaceae    | <i>Musa</i>          | <i>Musa yunnanensis</i>        | FJ871887 |
| Monocotyledons | Musaceae    | <i>Musa</i>          | <i>Musa yunnanensis</i>        | FJ871888 |
| Monocotyledons | Orchidaceae | <i>Grandiphyllum</i> | <i>Grandiphyllum auriculum</i> | FJ564447 |
| Monocotyledons | Orchidaceae | <i>Grandiphyllum</i> | <i>Grandiphyllum auriculum</i> | FJ564676 |
| Monocotyledons | Orchidaceae | <i>Grandiphyllum</i> | <i>Grandiphyllum hians</i>     | FJ564025 |
| Monocotyledons | Orchidaceae | <i>Grandiphyllum</i> | <i>Grandiphyllum hians</i>     | FJ564235 |
| Monocotyledons | Musaceae    | <i>Musa</i>          | <i>Musa paracoccinea</i>       | FJ871902 |
| Monocotyledons | Musaceae    | <i>Musa</i>          | <i>Musa paracoccinea</i>       | FJ871903 |
| Monocotyledons | Musaceae    | <i>Musa</i>          | <i>Musa paracoccinea</i>       | FJ871904 |
| Monocotyledons | Musaceae    | <i>Musa</i>          | <i>Musa viridis</i>            | FJ871893 |
| Monocotyledons | Musaceae    | <i>Musa</i>          | <i>Musa viridis</i>            | FJ871894 |
| Monocotyledons | Musaceae    | <i>Musa</i>          | <i>Musa viridis</i>            | FJ871895 |



|                |               |                  |                                |          |
|----------------|---------------|------------------|--------------------------------|----------|
| Monocotyledons | Asparagaceae  | <i>Asparagus</i> | <i>Asparagus aethiopicus</i>   | GU135328 |
| Monocotyledons | Asparagaceae  | <i>Asparagus</i> | <i>Asparagus aethiopicus</i>   | GU135434 |
| Monocotyledons | Asparagaceae  | <i>Asparagus</i> | <i>Asparagus aethiopicus</i>   | HM990140 |
| Monocotyledons | Cyperaceae    | <i>Cyperus</i>   | <i>Cyperus prolifer</i>        | GU135397 |
| Monocotyledons | Cyperaceae    | <i>Cyperus</i>   | <i>Cyperus prolifer</i>        | HQ705804 |
| Monocotyledons | Smilacaceae   | <i>Smilax</i>    | <i>Smilax glabra</i>           | GU372812 |
| Monocotyledons | Smilacaceae   | <i>Smilax</i>    | <i>Smilax glabra</i>           | GU372815 |
| Monocotyledons | Smilacaceae   | <i>Smilax</i>    | <i>Smilax glabra</i>           | GU372820 |
| Monocotyledons | Smilacaceae   | <i>Smilax</i>    | <i>Smilax glabra</i>           | JN047204 |
| Monocotyledons | Smilacaceae   | <i>Smilax</i>    | <i>Smilax glabra</i>           | JN047205 |
| Monocotyledons | Asparagaceae  | <i>Asparagus</i> | <i>Asparagus trichophyllus</i> | GQ434913 |
| Monocotyledons | Asparagaceae  | <i>Asparagus</i> | <i>Asparagus trichophyllus</i> | GQ434914 |
| Monocotyledons | Dioscoreaceae | <i>Dioscorea</i> | <i>Dioscorea menglaensis</i>   | JQ260334 |
| Monocotyledons | Dioscoreaceae | <i>Dioscorea</i> | <i>Dioscorea menglaensis</i>   | JQ260335 |
| Monocotyledons | Arecaceae     | <i>Caryota</i>   | <i>Caryota maxima</i>          | HQ415573 |
| Monocotyledons | Arecaceae     | <i>Caryota</i>   | <i>Caryota maxima</i>          | JF345044 |
| Monocotyledons | Arecaceae     | <i>Caryota</i>   | <i>Caryota maxima</i>          | JF345045 |
| Monocotyledons | Arecaceae     | <i>Caryota</i>   | <i>Caryota maxima</i>          | JF345050 |
| Monocotyledons | Arecaceae     | <i>Caryota</i>   | <i>Caryota maxima</i>          | JF345051 |
| Monocotyledons | Arecaceae     | <i>Caryota</i>   | <i>Caryota maxima</i>          | JF345052 |
| Monocotyledons | Arecaceae     | <i>Caryota</i>   | <i>Caryota maxima</i>          | JF345053 |
| Monocotyledons | Arecaceae     | <i>Caryota</i>   | <i>Caryota maxima</i>          | JF345065 |
| Monocotyledons | Poaceae       | <i>Kengyilia</i> | <i>Kengyilia geminata</i>      | JN045088 |
| Monocotyledons | Poaceae       | <i>Kengyilia</i> | <i>Kengyilia geminata</i>      | JN045089 |
| Monocotyledons | Poaceae       | <i>Kengyilia</i> | <i>Kengyilia geminata</i>      | HQ652847 |
| Monocotyledons | Poaceae       | <i>Kengyilia</i> | <i>Kengyilia geminata</i>      | HQ652848 |
| Monocotyledons | Smilacaceae   | <i>Smilax</i>    | <i>Smilax lanceifolia</i>      | JN047206 |
| Monocotyledons | Smilacaceae   | <i>Smilax</i>    | <i>Smilax lanceifolia</i>      | JN047207 |
| Monocotyledons | Commelinaceae | <i>Commelina</i> | <i>Commelina paludosa</i>      | JN044311 |
| Monocotyledons | Commelinaceae | <i>Commelina</i> | <i>Commelina paludosa</i>      | JN044312 |
| Monocotyledons | Melanthiaceae | <i>Paris</i>     | <i>Paris caobangensis</i>      | JN045699 |
| Monocotyledons | Melanthiaceae | <i>Paris</i>     | <i>Paris caobangensis</i>      | JN045700 |
| Monocotyledons | Melanthiaceae | <i>Veratrum</i>  | <i>Veratrum patulum</i>        | JF807772 |
| Monocotyledons | Melanthiaceae | <i>Veratrum</i>  | <i>Veratrum patulum</i>        | JF807773 |
| Monocotyledons | Melanthiaceae | <i>Veratrum</i>  | <i>Veratrum patulum</i>        | JF807774 |
| Monocotyledons | Melanthiaceae | <i>Veratrum</i>  | <i>Veratrum patulum</i>        | JF807775 |
| Monocotyledons | Melanthiaceae | <i>Veratrum</i>  | <i>Veratrum patulum</i>        | JF807776 |
| Monocotyledons | Melanthiaceae | <i>Veratrum</i>  | <i>Veratrum patulum</i>        | JF807777 |
| Monocotyledons | Melanthiaceae | <i>Veratrum</i>  | <i>Veratrum patulum</i>        | JF807778 |
| Monocotyledons | Melanthiaceae | <i>Veratrum</i>  | <i>Veratrum patulum</i>        | JF807779 |
| Monocotyledons | Melanthiaceae | <i>Veratrum</i>  | <i>Veratrum patulum</i>        | JF807780 |
| Monocotyledons | Arecaceae     | <i>Caryota</i>   | <i>Caryota obtusa</i>          | JF345046 |
| Monocotyledons | Arecaceae     | <i>Caryota</i>   | <i>Caryota obtusa</i>          | JF345047 |
| Monocotyledons | Arecaceae     | <i>Caryota</i>   | <i>Caryota obtusa</i>          | JF345061 |
| Monocotyledons | Arecaceae     | <i>Caryota</i>   | <i>Caryota obtusa</i>          | JF345062 |
| Monocotyledons | Arecaceae     | <i>Caryota</i>   | <i>Caryota obtusa</i>          | JF345063 |
| Monocotyledons | Arecaceae     | <i>Caryota</i>   | <i>Caryota obtusa</i>          | JF345064 |
| Monocotyledons | Arecaceae     | <i>Caryota</i>   | <i>Caryota kiriwongensis</i>   | JF345048 |
| Monocotyledons | Arecaceae     | <i>Caryota</i>   | <i>Caryota kiriwongensis</i>   | JF345049 |
| Monocotyledons | Arecaceae     | <i>Caryota</i>   | <i>Caryota monostachya</i>     | JF345056 |
| Monocotyledons | Arecaceae     | <i>Caryota</i>   | <i>Caryota monostachya</i>     | JF345057 |
| Monocotyledons | Arecaceae     | <i>Caryota</i>   | <i>Caryota monostachya</i>     | JF345058 |
| Monocotyledons | Arecaceae     | <i>Caryota</i>   | <i>Caryota no</i>              | JF345059 |

|                |              |                    |                                     |          |
|----------------|--------------|--------------------|-------------------------------------|----------|
| Monocotyledons | Arecaceae    | <i>Caryota</i>     | <i>Caryota no</i>                   | JF345060 |
| Monocotyledons | Cyperaceae   | <i>Cyperus</i>     | <i>Cyperus buchholzii</i>           | HQ705798 |
| Monocotyledons | Cyperaceae   | <i>Cyperus</i>     | <i>Cyperus buchholzii</i>           | HQ705799 |
| Monocotyledons | Cyperaceae   | <i>Cyperus</i>     | <i>Cyperus debilissimus</i>         | HQ705806 |
| Monocotyledons | Cyperaceae   | <i>Cyperus</i>     | <i>Cyperus debilissimus</i>         | HQ705807 |
| Monocotyledons | Cyperaceae   | <i>Cyperus</i>     | <i>Cyperus debilissimus</i>         | HQ705808 |
| Monocotyledons | Cyperaceae   | <i>Cyperus</i>     | <i>Cyperus friburgensis</i>         | HQ705791 |
| Monocotyledons | Cyperaceae   | <i>Cyperus</i>     | <i>Cyperus friburgensis</i>         | HQ705792 |
| Monocotyledons | Cyperaceae   | <i>Cyperus</i>     | <i>Cyperus waterloti</i>            | HQ705824 |
| Monocotyledons | Cyperaceae   | <i>Cyperus</i>     | <i>Cyperus waterloti</i>            | HQ705825 |
| Monocotyledons | Pandanaceae  | <i>Pandanus</i>    | <i>Pandanus austrosinensis</i>      | JN407016 |
| Monocotyledons | Pandanaceae  | <i>Pandanus</i>    | <i>Pandanus austrosinensis</i>      | JN407017 |
| Monocotyledons | Bromeliaceae | <i>Hohenbergia</i> | <i>Hohenbergia ramageana</i>        | JN204639 |
| Monocotyledons | Bromeliaceae | <i>Hohenbergia</i> | <i>Hohenbergia ramageana</i>        | JN204640 |
| Monocotyledons | Bromeliaceae | <i>Hohenbergia</i> | <i>Hohenbergia ridleyi</i>          | JN204641 |
| Monocotyledons | Bromeliaceae | <i>Hohenbergia</i> | <i>Hohenbergia ridleyi</i>          | JN204642 |
| Monocotyledons | Bromeliaceae | <i>Nidularium</i>  | <i>Nidularium altimontanum</i>      | JN204646 |
| Monocotyledons | Bromeliaceae | <i>Nidularium</i>  | <i>Nidularium altimontanum</i>      | JN204647 |
| Monocotyledons | Bromeliaceae | <i>Nidularium</i>  | <i>Nidularium angustibracteatum</i> | JN204648 |
| Monocotyledons | Bromeliaceae | <i>Nidularium</i>  | <i>Nidularium angustibracteatum</i> | JN204649 |
| Monocotyledons | Bromeliaceae | <i>Nidularium</i>  | <i>Nidularium innocentii</i>        | JN204650 |
| Monocotyledons | Bromeliaceae | <i>Nidularium</i>  | <i>Nidularium innocentii</i>        | JN204651 |
| Monocotyledons | Bromeliaceae | <i>Nidularium</i>  | <i>Nidularium innocentii</i>        | JN204652 |
| Monocotyledons | Bromeliaceae | <i>Nidularium</i>  | <i>Nidularium krisgreeniae</i>      | JN204653 |
| Monocotyledons | Bromeliaceae | <i>Nidularium</i>  | <i>Nidularium krisgreeniae</i>      | JN204654 |
| Monocotyledons | Bromeliaceae | <i>Pitcairnia</i>  | <i>Pitcairnia encholirioides</i>    | JN204657 |
| Monocotyledons | Bromeliaceae | <i>Pitcairnia</i>  | <i>Pitcairnia encholirioides</i>    | JN204658 |
| Monocotyledons | Bromeliaceae | <i>Pitcairnia</i>  | <i>Pitcairnia flammea</i>           | JN204659 |
| Monocotyledons | Bromeliaceae | <i>Pitcairnia</i>  | <i>Pitcairnia flammea</i>           | JN204660 |
| Monocotyledons | Bromeliaceae | <i>Vriesea</i>     | <i>Vriesea cacuminis</i>            | JN204669 |
| Monocotyledons | Bromeliaceae | <i>Vriesea</i>     | <i>Vriesea cacuminis</i>            | JN204670 |
| Monocotyledons | Bromeliaceae | <i>Vriesea</i>     | <i>Vriesea erythrodactylon</i>      | JN204675 |
| Monocotyledons | Bromeliaceae | <i>Vriesea</i>     | <i>Vriesea erythrodactylon</i>      | JN204676 |
| Monocotyledons | Bromeliaceae | <i>Vriesea</i>     | <i>Vriesea erythrodactylon</i>      | JN204677 |
| Monocotyledons | Bromeliaceae | <i>Vriesea</i>     | <i>Vriesea friburgensis</i>         | JN204678 |
| Monocotyledons | Bromeliaceae | <i>Vriesea</i>     | <i>Vriesea friburgensis</i>         | JN204679 |
| Monocotyledons | Bromeliaceae | <i>Vriesea</i>     | <i>Vriesea friburgensis</i>         | JN204680 |
| Monocotyledons | Bromeliaceae | <i>Vriesea</i>     | <i>Vriesea friburgensis</i>         | JN204681 |
| Monocotyledons | Bromeliaceae | <i>Vriesea</i>     | <i>Vriesea heterostachys</i>        | JN204683 |
| Monocotyledons | Bromeliaceae | <i>Vriesea</i>     | <i>Vriesea heterostachys</i>        | JN204684 |
| Monocotyledons | Bromeliaceae | <i>Vriesea</i>     | <i>Vriesea incurvata</i>            | JN204685 |
| Monocotyledons | Bromeliaceae | <i>Vriesea</i>     | <i>Vriesea incurvata</i>            | JN204686 |
| Monocotyledons | Bromeliaceae | <i>Vriesea</i>     | <i>Vriesea longicaulis</i>          | JN204687 |
| Monocotyledons | Bromeliaceae | <i>Vriesea</i>     | <i>Vriesea longicaulis</i>          | JN204688 |
| Monocotyledons | Bromeliaceae | <i>Vriesea</i>     | <i>Vriesea platynema</i>            | JN204673 |
| Monocotyledons | Bromeliaceae | <i>Vriesea</i>     | <i>Vriesea platynema</i>            | JN204689 |
| Monocotyledons | Bromeliaceae | <i>Vriesea</i>     | <i>Vriesea platynema</i>            | JN204690 |
| Monocotyledons | Bromeliaceae | <i>Vriesea</i>     | <i>Vriesea procera</i>              | JN204691 |
| Monocotyledons | Bromeliaceae | <i>Vriesea</i>     | <i>Vriesea procera</i>              | JN204692 |
| Monocotyledons | Bromeliaceae | <i>Vriesea</i>     | <i>Vriesea procera</i>              | JN204693 |
| Monocotyledons | Hypoxidaceae | <i>Pauridia</i>    | <i>Pauridia longituba</i>           | FM206348 |
| Monocotyledons | Hypoxidaceae | <i>Pauridia</i>    | <i>Pauridia longituba</i>           | FM206349 |
| Monocotyledons | Hypoxidaceae | <i>Pauridia</i>    | <i>Pauridia longituba</i>           | FM206350 |



|                |               |                      |                                  |          |
|----------------|---------------|----------------------|----------------------------------|----------|
| Monocotyledons | Hyacinthaceae | <i>Hyacinthoides</i> | <i>Hyacinthoides hispanica</i>   | FJ423349 |
| Monocotyledons | Hyacinthaceae | <i>Hyacinthoides</i> | <i>Hyacinthoides hispanica</i>   | FJ423350 |
| Monocotyledons | Hyacinthaceae | <i>Hyacinthoides</i> | <i>Hyacinthoides hispanica</i>   | FJ423351 |
| Monocotyledons | Hyacinthaceae | <i>Hyacinthoides</i> | <i>Hyacinthoides hispanica</i>   | FJ423352 |
| Monocotyledons | Hyacinthaceae | <i>Hyacinthoides</i> | <i>Hyacinthoides italica</i>     | FJ423289 |
| Monocotyledons | Hyacinthaceae | <i>Hyacinthoides</i> | <i>Hyacinthoides italica</i>     | FJ423290 |
| Monocotyledons | Hyacinthaceae | <i>Hyacinthoides</i> | <i>Hyacinthoides italica</i>     | FJ423291 |
| Monocotyledons | Hyacinthaceae | <i>Hyacinthoides</i> | <i>Hyacinthoides italica</i>     | FJ423292 |
| Monocotyledons | Hyacinthaceae | <i>Hyacinthoides</i> | <i>Hyacinthoides italica</i>     | FJ423293 |
| Monocotyledons | Hyacinthaceae | <i>Hyacinthoides</i> | <i>Hyacinthoides lingulata</i>   | FJ423294 |
| Monocotyledons | Hyacinthaceae | <i>Hyacinthoides</i> | <i>Hyacinthoides lingulata</i>   | FJ423295 |
| Monocotyledons | Hyacinthaceae | <i>Hyacinthoides</i> | <i>Hyacinthoides lingulata</i>   | FJ423296 |
| Monocotyledons | Hyacinthaceae | <i>Hyacinthoides</i> | <i>Hyacinthoides lingulata</i>   | FJ423297 |
| Monocotyledons | Hyacinthaceae | <i>Hyacinthoides</i> | <i>Hyacinthoides lingulata</i>   | FJ423298 |
| Monocotyledons | Hyacinthaceae | <i>Hyacinthoides</i> | <i>Hyacinthoides non-scripta</i> | FJ423316 |
| Monocotyledons | Hyacinthaceae | <i>Hyacinthoides</i> | <i>Hyacinthoides non-scripta</i> | FJ423317 |
| Monocotyledons | Hyacinthaceae | <i>Hyacinthoides</i> | <i>Hyacinthoides non-scripta</i> | FJ423318 |
| Monocotyledons | Hyacinthaceae | <i>Hyacinthoides</i> | <i>Hyacinthoides non-scripta</i> | FJ423319 |
| Monocotyledons | Hyacinthaceae | <i>Hyacinthoides</i> | <i>Hyacinthoides non-scripta</i> | FJ423320 |
| Monocotyledons | Hyacinthaceae | <i>Hyacinthoides</i> | <i>Hyacinthoides reverchonii</i> | FJ423304 |
| Monocotyledons | Hyacinthaceae | <i>Hyacinthoides</i> | <i>Hyacinthoides reverchonii</i> | FJ423305 |
| Monocotyledons | Hyacinthaceae | <i>Hyacinthoides</i> | <i>Hyacinthoides reverchonii</i> | FJ423306 |
| Monocotyledons | Hyacinthaceae | <i>Hyacinthoides</i> | <i>Hyacinthoides reverchonii</i> | FJ423307 |
| Monocotyledons | Hyacinthaceae | <i>Hyacinthoides</i> | <i>Hyacinthoides reverchonii</i> | FJ423308 |
| Monocotyledons | Liliaceae     | <i>Gagea</i>         | <i>Gagea lutea</i>               | AM409354 |
| Monocotyledons | Liliaceae     | <i>Gagea</i>         | <i>Gagea lutea</i>               | EU939250 |
| Monocotyledons | Zingiberaceae | <i>Alpinia</i>       | <i>Alpinia galanga</i>           | GQ435039 |
| Monocotyledons | Zingiberaceae | <i>Alpinia</i>       | <i>Alpinia galanga</i>           | GQ435040 |
| Monocotyledons | Zingiberaceae | <i>Alpinia</i>       | <i>Alpinia galanga</i>           | GQ435041 |
| Monocotyledons | Zingiberaceae | <i>Alpinia</i>       | <i>Alpinia galanga</i>           | EU552522 |
| Monocotyledons | Zingiberaceae | <i>Alpinia</i>       | <i>Alpinia galanga</i>           | EU552528 |
| Monocotyledons | Zingiberaceae | <i>Alpinia</i>       | <i>Alpinia galanga</i>           | GU180424 |
| Monocotyledons | Zingiberaceae | <i>Alpinia</i>       | <i>Alpinia galanga</i>           | JN043838 |
| Monocotyledons | Zingiberaceae | <i>Alpinia</i>       | <i>Alpinia galanga</i>           | JN043839 |
| Monocotyledons | Zingiberaceae | <i>Alpinia</i>       | <i>Alpinia galanga</i>           | JN043840 |
| Monocotyledons | Zingiberaceae | <i>Alpinia</i>       | <i>Alpinia galanga</i>           | JN043841 |
| Monocotyledons | Zingiberaceae | <i>Alpinia</i>       | <i>Alpinia galanga</i>           | JN043842 |
| Monocotyledons | Zingiberaceae | <i>Alpinia</i>       | <i>Alpinia galanga</i>           | JN043843 |
| Monocotyledons | Zingiberaceae | <i>Alpinia</i>       | <i>Alpinia zerumbet</i>          | GQ435051 |
| Monocotyledons | Zingiberaceae | <i>Alpinia</i>       | <i>Alpinia zerumbet</i>          | GU180443 |
| Monocotyledons | Zingiberaceae | <i>Alpinia</i>       | <i>Alpinia zerumbet</i>          | GU180444 |
| Monocotyledons | Zingiberaceae | <i>Alpinia</i>       | <i>Alpinia zerumbet</i>          | GU180445 |
| Monocotyledons | Zingiberaceae | <i>Alpinia</i>       | <i>Alpinia zerumbet</i>          | JN043874 |
| Monocotyledons | Zingiberaceae | <i>Alpinia</i>       | <i>Alpinia zerumbet</i>          | JN043875 |
| Monocotyledons | Zingiberaceae | <i>Alpinia</i>       | <i>Alpinia zerumbet</i>          | JN043876 |
| Monocotyledons | Zingiberaceae | <i>Alpinia</i>       | <i>Alpinia zerumbet</i>          | JN043877 |
| Monocotyledons | Zingiberaceae | <i>Alpinia</i>       | <i>Alpinia zerumbet</i>          | JN043878 |
| Monocotyledons | Zingiberaceae | <i>Boesenbergia</i>  | <i>Boesenbergia plicata</i>      | DQ408316 |
| Monocotyledons | Zingiberaceae | <i>Boesenbergia</i>  | <i>Boesenbergia plicata</i>      | DQ408317 |
| Monocotyledons | Zingiberaceae | <i>Boesenbergia</i>  | <i>Boesenbergia rotunda</i>      | DQ408325 |
| Monocotyledons | Zingiberaceae | <i>Boesenbergia</i>  | <i>Boesenbergia rotunda</i>      | DQ408326 |
| Monocotyledons | Zingiberaceae | <i>Boesenbergia</i>  | <i>Boesenbergia rotunda</i>      | DQ408327 |
| Monocotyledons | Zingiberaceae | <i>Kaempferia</i>    | <i>Kaempferia elegans</i>        | GQ386005 |

|                |                |                   |                              |          |
|----------------|----------------|-------------------|------------------------------|----------|
| Monocotyledons | Zingiberaceae  | <i>Kaempferia</i> | <i>Kaempferia elegans</i>    | GQ386006 |
| Monocotyledons | Zingiberaceae  | <i>Kaempferia</i> | <i>Kaempferia elegans</i>    | GQ386007 |
| Monocotyledons | Zingiberaceae  | <i>Kaempferia</i> | <i>Kaempferia elegans</i>    | GQ386008 |
| Monocotyledons | Zingiberaceae  | <i>Kaempferia</i> | <i>Kaempferia elegans</i>    | GQ386009 |
| Monocotyledons | Zingiberaceae  | <i>Kaempferia</i> | <i>Kaempferia elegans</i>    | GQ386010 |
| Monocotyledons | Zingiberaceae  | <i>Kaempferia</i> | <i>Kaempferia elegans</i>    | GQ386011 |
| Monocotyledons | Zingiberaceae  | <i>Kaempferia</i> | <i>Kaempferia elegans</i>    | GU180452 |
| Monocotyledons | Zingiberaceae  | <i>Kaempferia</i> | <i>Kaempferia elegans</i>    | GU180453 |
| Monocotyledons | Zingiberaceae  | <i>Kaempferia</i> | <i>Kaempferia galanga</i>    | GQ385977 |
| Monocotyledons | Zingiberaceae  | <i>Kaempferia</i> | <i>Kaempferia galanga</i>    | GQ385979 |
| Monocotyledons | Zingiberaceae  | <i>Kaempferia</i> | <i>Kaempferia galanga</i>    | GQ385980 |
| Monocotyledons | Zingiberaceae  | <i>Kaempferia</i> | <i>Kaempferia galanga</i>    | GQ435048 |
| Monocotyledons | Zingiberaceae  | <i>Kaempferia</i> | <i>Kaempferia galanga</i>    | GQ435049 |
| Monocotyledons | Zingiberaceae  | <i>Kaempferia</i> | <i>Kaempferia galanga</i>    | EU552523 |
| Monocotyledons | Zingiberaceae  | <i>Kaempferia</i> | <i>Kaempferia galanga</i>    | GU180437 |
| Monocotyledons | Zingiberaceae  | <i>Kaempferia</i> | <i>Kaempferia galanga</i>    | GU180438 |
| Monocotyledons | Zingiberaceae  | <i>Kaempferia</i> | <i>Kaempferia galanga</i>    | GU180439 |
| Monocotyledons | Zingiberaceae  | <i>Kaempferia</i> | <i>Kaempferia parviflora</i> | DQ408334 |
| Monocotyledons | Zingiberaceae  | <i>Kaempferia</i> | <i>Kaempferia parviflora</i> | GQ386012 |
| Monocotyledons | Zingiberaceae  | <i>Kaempferia</i> | <i>Kaempferia parviflora</i> | GQ386013 |
| Monocotyledons | Zingiberaceae  | <i>Kaempferia</i> | <i>Kaempferia parviflora</i> | GQ386014 |
| Monocotyledons | Zingiberaceae  | <i>Kaempferia</i> | <i>Kaempferia parviflora</i> | GQ386015 |
| Monocotyledons | Zingiberaceae  | <i>Kaempferia</i> | <i>Kaempferia roscoeana</i>  | GQ386029 |
| Monocotyledons | Zingiberaceae  | <i>Kaempferia</i> | <i>Kaempferia roscoeana</i>  | GQ386030 |
| Monocotyledons | Zingiberaceae  | <i>Kaempferia</i> | <i>Kaempferia rotunda</i>    | GQ386031 |
| Monocotyledons | Zingiberaceae  | <i>Kaempferia</i> | <i>Kaempferia rotunda</i>    | GQ386032 |
| Monocotyledons | Zingiberaceae  | <i>Kaempferia</i> | <i>Kaempferia rotunda</i>    | GQ386033 |
| Monocotyledons | Zingiberaceae  | <i>Kaempferia</i> | <i>Kaempferia rotunda</i>    | GQ386034 |
| Monocotyledons | Zingiberaceae  | <i>Kaempferia</i> | <i>Kaempferia rotunda</i>    | GQ386035 |
| Monocotyledons | Zingiberaceae  | <i>Kaempferia</i> | <i>Kaempferia rotunda</i>    | GQ386036 |
| Monocotyledons | Zingiberaceae  | <i>Kaempferia</i> | <i>Kaempferia rotunda</i>    | GQ386037 |
| Monocotyledons | Zingiberaceae  | <i>Kaempferia</i> | <i>Kaempferia rotunda</i>    | GU180430 |
| Monocotyledons | Zingiberaceae  | <i>Alpinia</i>    | <i>Alpinia blepharocalyx</i> | JN043817 |
| Monocotyledons | Zingiberaceae  | <i>Alpinia</i>    | <i>Alpinia blepharocalyx</i> | JN043818 |
| Monocotyledons | Zingiberaceae  | <i>Alpinia</i>    | <i>Alpinia blepharocalyx</i> | JN043819 |
| Monocotyledons | Zingiberaceae  | <i>Alpinia</i>    | <i>Alpinia conchigera</i>    | JN043826 |
| Monocotyledons | Zingiberaceae  | <i>Alpinia</i>    | <i>Alpinia conchigera</i>    | JN043827 |
| Monocotyledons | Zingiberaceae  | <i>Alpinia</i>    | <i>Alpinia conchigera</i>    | JN043828 |
| Monocotyledons | Zingiberaceae  | <i>Alpinia</i>    | <i>Alpinia intermedia</i>    | JN043850 |
| Monocotyledons | Zingiberaceae  | <i>Alpinia</i>    | <i>Alpinia intermedia</i>    | JN043851 |
| Monocotyledons | Zingiberaceae  | <i>Alpinia</i>    | <i>Alpinia intermedia</i>    | JN043852 |
| Monocotyledons | Zingiberaceae  | <i>Alpinia</i>    | <i>Alpinia intermedia</i>    | JN043853 |
| Monocotyledons | Zingiberaceae  | <i>Alpinia</i>    | <i>Alpinia nigra</i>         | JN043858 |
| Monocotyledons | Zingiberaceae  | <i>Alpinia</i>    | <i>Alpinia nigra</i>         | JN043859 |
| Monocotyledons | Zingiberaceae  | <i>Alpinia</i>    | <i>Alpinia polyantha</i>     | GU180425 |
| Monocotyledons | Zingiberaceae  | <i>Alpinia</i>    | <i>Alpinia polyantha</i>     | JN043871 |
| Monocotyledons | Zingiberaceae  | <i>Alpinia</i>    | <i>Alpinia polyantha</i>     | JN043872 |
| Monocotyledons | Zingiberaceae  | <i>Alpinia</i>    | <i>Alpinia polyantha</i>     | JN043873 |
| Monocotyledons | Amaryllidaceae | <i>Lycoris</i>    | <i>Lycoris squamigera</i>    | GQ923941 |
| Monocotyledons | Amaryllidaceae | <i>Lycoris</i>    | <i>Lycoris squamigera</i>    | HM748829 |
| Monocotyledons | Zingiberaceae  | <i>Alpinia</i>    | <i>Alpinia aquatica</i>      | JN043815 |
| Monocotyledons | Zingiberaceae  | <i>Alpinia</i>    | <i>Alpinia aquatica</i>      | JN043816 |
| Monocotyledons | Zingiberaceae  | <i>Alpinia</i>    | <i>Alpinia formosana</i>     | JN043833 |

|                |               |                |                             |          |
|----------------|---------------|----------------|-----------------------------|----------|
| Monocotyledons | Zingiberaceae | <i>Alpinia</i> | <i>Alpinia formosana</i>    | JN043834 |
| Monocotyledons | Zingiberaceae | <i>Alpinia</i> | <i>Alpinia guinanensis</i>  | JN043846 |
| Monocotyledons | Zingiberaceae | <i>Alpinia</i> | <i>Alpinia guinanensis</i>  | JN043847 |
| Monocotyledons | Zingiberaceae | <i>Alpinia</i> | <i>Alpinia hainanensis</i>  | GU180421 |
| Monocotyledons | Zingiberaceae | <i>Alpinia</i> | <i>Alpinia hainanensis</i>  | JN043848 |
| Monocotyledons | Zingiberaceae | <i>Alpinia</i> | <i>Alpinia hainanensis</i>  | JN043849 |
| Monocotyledons | Zingiberaceae | <i>Alpinia</i> | <i>Alpinia oxyphylla</i>    | EU552526 |
| Monocotyledons | Zingiberaceae | <i>Alpinia</i> | <i>Alpinia oxyphylla</i>    | GU180446 |
| Monocotyledons | Zingiberaceae | <i>Alpinia</i> | <i>Alpinia oxyphylla</i>    | GU180447 |
| Monocotyledons | Zingiberaceae | <i>Alpinia</i> | <i>Alpinia oxyphylla</i>    | JN043863 |
| Monocotyledons | Zingiberaceae | <i>Alpinia</i> | <i>Alpinia oxyphylla</i>    | JN043864 |
| Monocotyledons | Zingiberaceae | <i>Alpinia</i> | <i>Alpinia oxyphylla</i>    | JN043865 |
| Monocotyledons | Zingiberaceae | <i>Alpinia</i> | <i>Alpinia oxyphylla</i>    | JN043866 |
| Monocotyledons | Zingiberaceae | <i>Curcuma</i> | <i>Curcuma aromatica</i>    | GQ435050 |
| Monocotyledons | Zingiberaceae | <i>Curcuma</i> | <i>Curcuma aromatica</i>    | EU552527 |
| Monocotyledons | Zingiberaceae | <i>Curcuma</i> | <i>Curcuma aromatica</i>    | GU180440 |
| Monocotyledons | Zingiberaceae | <i>Curcuma</i> | <i>Curcuma aromatica</i>    | GU180441 |
| Monocotyledons | Zingiberaceae | <i>Curcuma</i> | <i>Curcuma aromatica</i>    | GU180442 |
| Monocotyledons | Zingiberaceae | <i>Curcuma</i> | <i>Curcuma aromatica</i>    | GU180448 |
| Monocotyledons | Zingiberaceae | <i>Curcuma</i> | <i>Curcuma aromatica</i>    | GU180449 |
| Monocotyledons | Zingiberaceae | <i>Curcuma</i> | <i>Curcuma aromatica</i>    | GU180450 |
| Monocotyledons | Zingiberaceae | <i>Curcuma</i> | <i>Curcuma aromatica</i>    | GU180451 |
| Monocotyledons | Zingiberaceae | <i>Curcuma</i> | <i>Curcuma kwangsiensis</i> | GQ435042 |
| Monocotyledons | Zingiberaceae | <i>Curcuma</i> | <i>Curcuma kwangsiensis</i> | GQ435043 |
| Monocotyledons | Zingiberaceae | <i>Curcuma</i> | <i>Curcuma kwangsiensis</i> | EU552520 |
| Monocotyledons | Zingiberaceae | <i>Curcuma</i> | <i>Curcuma kwangsiensis</i> | GU180429 |
| Monocotyledons | Zingiberaceae | <i>Curcuma</i> | <i>Curcuma kwangsiensis</i> | JF730251 |
| Monocotyledons | Zingiberaceae | <i>Curcuma</i> | <i>Curcuma longa</i>        | FJ687416 |
| Monocotyledons | Zingiberaceae | <i>Curcuma</i> | <i>Curcuma longa</i>        | GU180434 |
| Monocotyledons | Zingiberaceae | <i>Curcuma</i> | <i>Curcuma longa</i>        | GU180435 |
| Monocotyledons | Zingiberaceae | <i>Curcuma</i> | <i>Curcuma longa</i>        | GU180436 |
| Monocotyledons | Zingiberaceae | <i>Curcuma</i> | <i>Curcuma longa</i>        | JF730221 |
| Monocotyledons | Zingiberaceae | <i>Curcuma</i> | <i>Curcuma longa</i>        | JF730222 |
| Monocotyledons | Zingiberaceae | <i>Curcuma</i> | <i>Curcuma longa</i>        | JF730223 |
| Monocotyledons | Zingiberaceae | <i>Curcuma</i> | <i>Curcuma longa</i>        | JF730224 |
| Monocotyledons | Zingiberaceae | <i>Curcuma</i> | <i>Curcuma longa</i>        | JF730225 |
| Monocotyledons | Zingiberaceae | <i>Curcuma</i> | <i>Curcuma longa</i>        | JF730226 |
| Monocotyledons | Zingiberaceae | <i>Curcuma</i> | <i>Curcuma longa</i>        | JF730227 |
| Monocotyledons | Zingiberaceae | <i>Curcuma</i> | <i>Curcuma longa</i>        | JF730228 |
| Monocotyledons | Zingiberaceae | <i>Curcuma</i> | <i>Curcuma longa</i>        | JF730229 |
| Monocotyledons | Zingiberaceae | <i>Curcuma</i> | <i>Curcuma longa</i>        | JF730230 |
| Monocotyledons | Zingiberaceae | <i>Curcuma</i> | <i>Curcuma longa</i>        | JF730231 |
| Monocotyledons | Zingiberaceae | <i>Curcuma</i> | <i>Curcuma longa</i>        | JF730232 |
| Monocotyledons | Zingiberaceae | <i>Curcuma</i> | <i>Curcuma longa</i>        | JF730233 |
| Monocotyledons | Zingiberaceae | <i>Curcuma</i> | <i>Curcuma longa</i>        | JF730234 |
| Monocotyledons | Zingiberaceae | <i>Curcuma</i> | <i>Curcuma longa</i>        | JF730235 |
| Monocotyledons | Zingiberaceae | <i>Curcuma</i> | <i>Curcuma longa</i>        | JF730236 |
| Monocotyledons | Zingiberaceae | <i>Curcuma</i> | <i>Curcuma longa</i>        | JF730237 |
| Monocotyledons | Zingiberaceae | <i>Curcuma</i> | <i>Curcuma longa</i>        | JF730238 |
| Monocotyledons | Zingiberaceae | <i>Curcuma</i> | <i>Curcuma longa</i>        | JF730239 |
| Monocotyledons | Zingiberaceae | <i>Curcuma</i> | <i>Curcuma longa</i>        | JF730253 |
| Monocotyledons | Zingiberaceae | <i>Curcuma</i> | <i>Curcuma longa</i>        | JF730254 |
| Monocotyledons | Zingiberaceae | <i>Curcuma</i> | <i>Curcuma longa</i>        | JF730255 |

|                |                |                |                             |          |
|----------------|----------------|----------------|-----------------------------|----------|
| Monocotyledons | Zingiberaceae  | <i>Curcuma</i> | <i>Curcuma phaeocaulis</i>  | EU552524 |
| Monocotyledons | Zingiberaceae  | <i>Curcuma</i> | <i>Curcuma phaeocaulis</i>  | JF730247 |
| Monocotyledons | Zingiberaceae  | <i>Curcuma</i> | <i>Curcuma phaeocaulis</i>  | JF730248 |
| Monocotyledons | Zingiberaceae  | <i>Curcuma</i> | <i>Curcuma phaeocaulis</i>  | JF730249 |
| Monocotyledons | Zingiberaceae  | <i>Curcuma</i> | <i>Curcuma phaeocaulis</i>  | JF730256 |
| Monocotyledons | Zingiberaceae  | <i>Curcuma</i> | <i>Curcuma phaeocaulis</i>  | JF730257 |
| Monocotyledons | Zingiberaceae  | <i>Curcuma</i> | <i>Curcuma sichuanensis</i> | JF730240 |
| Monocotyledons | Zingiberaceae  | <i>Curcuma</i> | <i>Curcuma sichuanensis</i> | JF730241 |
| Monocotyledons | Zingiberaceae  | <i>Curcuma</i> | <i>Curcuma sichuanensis</i> | JF730242 |
| Monocotyledons | Zingiberaceae  | <i>Curcuma</i> | <i>Curcuma sichuanensis</i> | JF730243 |
| Monocotyledons | Zingiberaceae  | <i>Curcuma</i> | <i>Curcuma sichuanensis</i> | JF730244 |
| Monocotyledons | Zingiberaceae  | <i>Curcuma</i> | <i>Curcuma sichuanensis</i> | JF730245 |
| Monocotyledons | Zingiberaceae  | <i>Curcuma</i> | <i>Curcuma sichuanensis</i> | JF730246 |
| Monocotyledons | Zingiberaceae  | <i>Curcuma</i> | <i>Curcuma wenyujin</i>     | EU552525 |
| Monocotyledons | Zingiberaceae  | <i>Curcuma</i> | <i>Curcuma wenyujin</i>     | JF730252 |
| Monocotyledons | Zingiberaceae  | <i>Curcuma</i> | <i>Curcuma zedoaria</i>     | FJ687417 |
| Monocotyledons | Zingiberaceae  | <i>Curcuma</i> | <i>Curcuma zedoaria</i>     | GU180426 |
| Monocotyledons | Amaryllidaceae | <i>Lycoris</i> | <i>Lycoris aurea</i>        | GQ923938 |
| Monocotyledons | Amaryllidaceae | <i>Lycoris</i> | <i>Lycoris aurea</i>        | HM748822 |
| Monocotyledons | Stemonaceae    | <i>Stemona</i> | <i>Stemona tuberosa</i>     | GQ434873 |
| Monocotyledons | Stemonaceae    | <i>Stemona</i> | <i>Stemona tuberosa</i>     | GQ434874 |
| Monocotyledons | Stemonaceae    | <i>Stemona</i> | <i>Stemona tuberosa</i>     | AB373199 |
| Monocotyledons | Liliaceae      | <i>Gagea</i>   | <i>Gagea bohemica</i>       | AM932484 |
| Monocotyledons | Liliaceae      | <i>Gagea</i>   | <i>Gagea bohemica</i>       | AM265595 |
| Monocotyledons | Liliaceae      | <i>Gagea</i>   | <i>Gagea bohemica</i>       | AM282987 |
| Monocotyledons | Liliaceae      | <i>Gagea</i>   | <i>Gagea villosa</i>        | AM282991 |
| Monocotyledons | Liliaceae      | <i>Gagea</i>   | <i>Gagea villosa</i>        | AM282992 |
| Monocotyledons | Liliaceae      | <i>Gagea</i>   | <i>Gagea villosa</i>        | EU939276 |
| Monocotyledons | Liliaceae      | <i>Gagea</i>   | <i>Gagea villosa</i>        | EU939277 |
| Monocotyledons | Liliaceae      | <i>Gagea</i>   | <i>Gagea villosa</i>        | EU939279 |
| Monocotyledons | Liliaceae      | <i>Gagea</i>   | <i>Gagea villosa</i>        | FN868213 |
| Monocotyledons | Liliaceae      | <i>Gagea</i>   | <i>Gagea villosa</i>        | FN868214 |
| Monocotyledons | Liliaceae      | <i>Gagea</i>   | <i>Gagea villosa</i>        | FN868215 |
| Monocotyledons | Liliaceae      | <i>Gagea</i>   | <i>Gagea villosa</i>        | FN868216 |
| Monocotyledons | Liliaceae      | <i>Gagea</i>   | <i>Gagea villosa</i>        | FN868217 |
| Monocotyledons | Liliaceae      | <i>Gagea</i>   | <i>Gagea villosa</i>        | FN868218 |
| Monocotyledons | Liliaceae      | <i>Gagea</i>   | <i>Gagea villosa</i>        | FN868219 |
| Monocotyledons | Liliaceae      | <i>Gagea</i>   | <i>Gagea villosa</i>        | FN868220 |
| Monocotyledons | Liliaceae      | <i>Gagea</i>   | <i>Gagea minima</i>         | AM238519 |
| Monocotyledons | Liliaceae      | <i>Gagea</i>   | <i>Gagea minima</i>         | AM238524 |
| Monocotyledons | Liliaceae      | <i>Gagea</i>   | <i>Gagea minima</i>         | AM282996 |
| Monocotyledons | Zingiberaceae  | <i>Alpinia</i> | <i>Alpinia calcarata</i>    | JN043820 |
| Monocotyledons | Zingiberaceae  | <i>Alpinia</i> | <i>Alpinia calcarata</i>    | JN043821 |
| Monocotyledons | Zingiberaceae  | <i>Alpinia</i> | <i>Alpinia calcarata</i>    | JN043822 |
| Monocotyledons | Zingiberaceae  | <i>Alpinia</i> | <i>Alpinia calcarata</i>    | JN043823 |
| Monocotyledons | Zingiberaceae  | <i>Alpinia</i> | <i>Alpinia carolinensis</i> | JN043824 |
| Monocotyledons | Zingiberaceae  | <i>Alpinia</i> | <i>Alpinia carolinensis</i> | JN043825 |
| Monocotyledons | Zingiberaceae  | <i>Alpinia</i> | <i>Alpinia elegans</i>      | JN043829 |
| Monocotyledons | Zingiberaceae  | <i>Alpinia</i> | <i>Alpinia elegans</i>      | JN043830 |
| Monocotyledons | Zingiberaceae  | <i>Alpinia</i> | <i>Alpinia foxworthyi</i>   | JN043835 |
| Monocotyledons | Zingiberaceae  | <i>Alpinia</i> | <i>Alpinia foxworthyi</i>   | JN043836 |
| Monocotyledons | Zingiberaceae  | <i>Alpinia</i> | <i>Alpinia foxworthyi</i>   | JN043837 |
| Monocotyledons | Zingiberaceae  | <i>Alpinia</i> | <i>Alpinia officinarum</i>  | EU552529 |

|                |                |                     |                                |          |
|----------------|----------------|---------------------|--------------------------------|----------|
| Monocotyledons | Zingiberaceae  | <i>Alpinia</i>      | <i>Alpinia officinarum</i>     | GU180427 |
| Monocotyledons | Zingiberaceae  | <i>Alpinia</i>      | <i>Alpinia officinarum</i>     | GU180428 |
| Monocotyledons | Zingiberaceae  | <i>Kaempferia</i>   | <i>Kaempferia pulchra</i>      | GQ386025 |
| Monocotyledons | Zingiberaceae  | <i>Kaempferia</i>   | <i>Kaempferia pulchra</i>      | GQ386026 |
| Monocotyledons | Zingiberaceae  | <i>Kaempferia</i>   | <i>Kaempferia pulchra</i>      | GQ386027 |
| Monocotyledons | Zingiberaceae  | <i>Kaempferia</i>   | <i>Kaempferia pulchra</i>      | GQ386028 |
| Monocotyledons | Amaryllidaceae | <i>Lycoris</i>      | <i>Lycoris albiflora</i>       | GQ923943 |
| Monocotyledons | Amaryllidaceae | <i>Lycoris</i>      | <i>Lycoris albiflora</i>       | HM748820 |
| Monocotyledons | Zingiberaceae  | <i>Alpinia</i>      | <i>Alpinia jianganfeng</i>     | JN043854 |
| Monocotyledons | Zingiberaceae  | <i>Alpinia</i>      | <i>Alpinia jianganfeng</i>     | JN043855 |
| Monocotyledons | Amaryllidaceae | <i>Lycoris</i>      | <i>Lycoris radiata</i>         | GQ923942 |
| Monocotyledons | Amaryllidaceae | <i>Lycoris</i>      | <i>Lycoris radiata</i>         | HM748828 |
| Monocotyledons | Zingiberaceae  | <i>Kaempferia</i>   | <i>Kaempferia angustifolia</i> | GQ386041 |
| Monocotyledons | Zingiberaceae  | <i>Kaempferia</i>   | <i>Kaempferia angustifolia</i> | GQ386042 |
| Monocotyledons | Zingiberaceae  | <i>Boesenbergia</i> | <i>Boesenbergia longiflora</i> | DQ408311 |
| Monocotyledons | Zingiberaceae  | <i>Boesenbergia</i> | <i>Boesenbergia longiflora</i> | DQ408312 |
| Monocotyledons | Amaryllidaceae | <i>Lycoris</i>      | <i>Lycoris chinensis</i>       | GQ923949 |
| Monocotyledons | Amaryllidaceae | <i>Lycoris</i>      | <i>Lycoris chinensis</i>       | HM748827 |
| Monocotyledons | Amaryllidaceae | <i>Lycoris</i>      | <i>Lycoris longituba</i>       | GQ923944 |
| Monocotyledons | Amaryllidaceae | <i>Lycoris</i>      | <i>Lycoris longituba</i>       | HM748817 |
| Monocotyledons | Liliaceae      | <i>Gagea</i>        | <i>Gagea graeca</i>            | AM779097 |
| Monocotyledons | Liliaceae      | <i>Gagea</i>        | <i>Gagea graeca</i>            | AM939647 |
| Monocotyledons | Liliaceae      | <i>Gagea</i>        | <i>Gagea graeca</i>            | AM939648 |
| Monocotyledons | Liliaceae      | <i>Gagea</i>        | <i>Gagea graeca</i>            | EU939285 |
| Monocotyledons | Zingiberaceae  | <i>Alpinia</i>      | <i>Alpinia kwangsiensis</i>    | GU180422 |
| Monocotyledons | Zingiberaceae  | <i>Alpinia</i>      | <i>Alpinia kwangsiensis</i>    | JN043856 |
| Monocotyledons | Zingiberaceae  | <i>Alpinia</i>      | <i>Alpinia kwangsiensis</i>    | JN043857 |
| Monocotyledons | Amaryllidaceae | <i>Lycoris</i>      | <i>Lycoris anhuiensis</i>      | GQ923948 |
| Monocotyledons | Amaryllidaceae | <i>Lycoris</i>      | <i>Lycoris anhuiensis</i>      | HM748823 |
| Monocotyledons | Amaryllidaceae | <i>Lycoris</i>      | <i>Lycoris sprengeri</i>       | GQ923945 |
| Monocotyledons | Amaryllidaceae | <i>Lycoris</i>      | <i>Lycoris sprengeri</i>       | HM748815 |
| Monocotyledons | Amaryllidaceae | <i>Lycoris</i>      | <i>Lycoris rosea</i>           | GQ923947 |
| Monocotyledons | Amaryllidaceae | <i>Lycoris</i>      | <i>Lycoris rosea</i>           | HM748825 |
| Monocotyledons | Amaryllidaceae | <i>Lycoris</i>      | <i>Lycoris haywardii</i>       | GQ923950 |
| Monocotyledons | Amaryllidaceae | <i>Lycoris</i>      | <i>Lycoris haywardii</i>       | HM748816 |
| Monocotyledons | Amaryllidaceae | <i>Lycoris</i>      | <i>Lycoris incarnata</i>       | GQ923939 |
| Monocotyledons | Amaryllidaceae | <i>Lycoris</i>      | <i>Lycoris incarnata</i>       | HM748830 |
| Monocotyledons | Amaryllidaceae | <i>Lycoris</i>      | <i>Lycoris straminea</i>       | GQ923946 |
| Monocotyledons | Amaryllidaceae | <i>Lycoris</i>      | <i>Lycoris straminea</i>       | HM748826 |
| Monocotyledons | Liliaceae      | <i>Gagea</i>        | <i>Gagea liotardii</i>         | AM238521 |
| Monocotyledons | Liliaceae      | <i>Gagea</i>        | <i>Gagea liotardii</i>         | AM238522 |
| Monocotyledons | Liliaceae      | <i>Gagea</i>        | <i>Gagea liotardii</i>         | AM238531 |
| Monocotyledons | Liliaceae      | <i>Gagea</i>        | <i>Gagea confusa</i>           | EU939238 |
| Monocotyledons | Liliaceae      | <i>Gagea</i>        | <i>Gagea confusa</i>           | EU939239 |
| Monocotyledons | Liliaceae      | <i>Gagea</i>        | <i>Gagea reticulata</i>        | AM238528 |
| Monocotyledons | Liliaceae      | <i>Gagea</i>        | <i>Gagea reticulata</i>        | AM287270 |
| Monocotyledons | Liliaceae      | <i>Gagea</i>        | <i>Gagea reticulata</i>        | EU939254 |
| Monocotyledons | Liliaceae      | <i>Gagea</i>        | <i>Gagea reticulata</i>        | EU939256 |
| Monocotyledons | Liliaceae      | <i>Gagea</i>        | <i>Gagea reticulata</i>        | EU939257 |
| Monocotyledons | Liliaceae      | <i>Gagea</i>        | <i>Gagea reticulata</i>        | EU939258 |
| Monocotyledons | Liliaceae      | <i>Gagea</i>        | <i>Gagea reticulata</i>        | EU939259 |
| Monocotyledons | Liliaceae      | <i>Gagea</i>        | <i>Gagea reticulata</i>        | EU939260 |
| Monocotyledons | Liliaceae      | <i>Gagea</i>        | <i>Gagea afghanica</i>         | EU939221 |



|                |               |                     |                                |          |
|----------------|---------------|---------------------|--------------------------------|----------|
| Monocotyledons | Liliaceae     | <i>Gagea</i>        | <i>Gagea afghanica</i>         | EU939222 |
| Monocotyledons | Liliaceae     | <i>Gagea</i>        | <i>Gagea afghanica</i>         | EU939223 |
| Monocotyledons | Liliaceae     | <i>Gagea</i>        | <i>Gagea bulbifera</i>         | FR690829 |
| Monocotyledons | Liliaceae     | <i>Gagea</i>        | <i>Gagea bulbifera</i>         | FR690830 |
| Monocotyledons | Liliaceae     | <i>Gagea</i>        | <i>Gagea bulbifera</i>         | EU939226 |
| Monocotyledons | Liliaceae     | <i>Gagea</i>        | <i>Gagea bulbifera</i>         | EU939227 |
| Monocotyledons | Liliaceae     | <i>Gagea</i>        | <i>Gagea foliosa</i>           | AM265596 |
| Monocotyledons | Liliaceae     | <i>Gagea</i>        | <i>Gagea foliosa</i>           | AM282993 |
| Monocotyledons | Liliaceae     | <i>Gagea</i>        | <i>Gagea dschungarica</i>      | EU939240 |
| Monocotyledons | Liliaceae     | <i>Gagea</i>        | <i>Gagea dschungarica</i>      | EU939241 |
| Monocotyledons | Liliaceae     | <i>Gagea</i>        | <i>Gagea chomutovae</i>        | EU939234 |
| Monocotyledons | Liliaceae     | <i>Gagea</i>        | <i>Gagea chomutovae</i>        | EU939235 |
| Monocotyledons | Zingiberaceae | <i>Boesenbergia</i> | <i>Boesenbergia curtisii</i>   | DQ408309 |
| Monocotyledons | Zingiberaceae | <i>Boesenbergia</i> | <i>Boesenbergia curtisii</i>   | DQ408310 |
| Monocotyledons | Zingiberaceae | <i>Boesenbergia</i> | <i>Boesenbergia longipes</i>   | DQ408313 |
| Monocotyledons | Zingiberaceae | <i>Boesenbergia</i> | <i>Boesenbergia longipes</i>   | DQ408314 |
| Monocotyledons | Zingiberaceae | <i>Kaempferia</i>   | <i>Kaempferia candida</i>      | GQ386003 |
| Monocotyledons | Zingiberaceae | <i>Kaempferia</i>   | <i>Kaempferia candida</i>      | GQ386004 |
| Monocotyledons | Zingiberaceae | <i>Kaempferia</i>   | <i>Kaempferia marginata</i>    | GQ385976 |
| Monocotyledons | Zingiberaceae | <i>Kaempferia</i>   | <i>Kaempferia marginata</i>    | GQ385981 |
| Monocotyledons | Zingiberaceae | <i>Kaempferia</i>   | <i>Kaempferia marginata</i>    | GQ385982 |
| Monocotyledons | Zingiberaceae | <i>Kaempferia</i>   | <i>Kaempferia marginata</i>    | GQ385983 |
| Monocotyledons | Zingiberaceae | <i>Kaempferia</i>   | <i>Kaempferia marginata</i>    | GQ385984 |
| Monocotyledons | Liliaceae     | <i>Gagea</i>        | <i>Gagea gageoides</i>         | EU939246 |
| Monocotyledons | Liliaceae     | <i>Gagea</i>        | <i>Gagea gageoides</i>         | EU939247 |
| Monocotyledons | Liliaceae     | <i>Gagea</i>        | <i>Gagea alexeenkoana</i>      | EU939224 |
| Monocotyledons | Liliaceae     | <i>Gagea</i>        | <i>Gagea alexeenkoana</i>      | EU939225 |
| Monocotyledons | Zingiberaceae | <i>Alpinia</i>      | <i>Alpinia oblongifolia</i>    | JN043860 |
| Monocotyledons | Zingiberaceae | <i>Alpinia</i>      | <i>Alpinia oblongifolia</i>    | JN043861 |
| Monocotyledons | Zingiberaceae | <i>Alpinia</i>      | <i>Alpinia oblongifolia</i>    | JN043862 |
| Monocotyledons | Liliaceae     | <i>Gagea</i>        | <i>Gagea granulosa</i>         | FR690847 |
| Monocotyledons | Liliaceae     | <i>Gagea</i>        | <i>Gagea granulosa</i>         | FR690848 |
| Monocotyledons | Liliaceae     | <i>Gagea</i>        | <i>Gagea granulosa</i>         | AM238517 |
| Monocotyledons | Liliaceae     | <i>Gagea</i>        | <i>Gagea granulosa</i>         | AM238518 |
| Monocotyledons | Liliaceae     | <i>Gagea</i>        | <i>Gagea ova</i>               | FR690838 |
| Monocotyledons | Liliaceae     | <i>Gagea</i>        | <i>Gagea ova</i>               | FR690839 |
| Monocotyledons | Liliaceae     | <i>Gagea</i>        | <i>Gagea ova</i>               | AM238526 |
| Monocotyledons | Liliaceae     | <i>Gagea</i>        | <i>Gagea ova</i>               | AM265588 |
| Monocotyledons | Liliaceae     | <i>Gagea</i>        | <i>Gagea vegeta</i>            | AM238520 |
| Monocotyledons | Liliaceae     | <i>Gagea</i>        | <i>Gagea vegeta</i>            | EU939274 |
| Monocotyledons | Liliaceae     | <i>Gagea</i>        | <i>Gagea vegeta</i>            | EU939275 |
| Monocotyledons | Zingiberaceae | <i>Curcuma</i>      | <i>Curcuma cochinchinensis</i> | GQ248280 |
| Monocotyledons | Zingiberaceae | <i>Curcuma</i>      | <i>Curcuma cochinchinensis</i> | EF590684 |
| Monocotyledons | Liliaceae     | <i>Gagea</i>        | <i>Gagea tenera</i>            | AM238527 |
| Monocotyledons | Liliaceae     | <i>Gagea</i>        | <i>Gagea tenera</i>            | EU939272 |
| Monocotyledons | Liliaceae     | <i>Gagea</i>        | <i>Gagea tenera</i>            | EU939273 |
| Monocotyledons | Liliaceae     | <i>Gagea</i>        | <i>Gagea glacialis</i>         | AM265586 |
| Monocotyledons | Liliaceae     | <i>Gagea</i>        | <i>Gagea glacialis</i>         | FN868203 |
| Monocotyledons | Liliaceae     | <i>Gagea</i>        | <i>Gagea glacialis</i>         | FN868204 |
| Monocotyledons | Liliaceae     | <i>Gagea</i>        | <i>Gagea glacialis</i>         | FN868205 |
| Monocotyledons | Liliaceae     | <i>Gagea</i>        | <i>Gagea glacialis</i>         | FN868206 |
| Monocotyledons | Liliaceae     | <i>Gagea</i>        | <i>Gagea glacialis</i>         | FN868207 |
| Monocotyledons | Liliaceae     | <i>Gagea</i>        | <i>Gagea glacialis</i>         | FN868208 |

|                |               |                   |                                |          |
|----------------|---------------|-------------------|--------------------------------|----------|
| Monocotyledons | Liliaceae     | <i>Gagea</i>      | <i>Gagea glacialis</i>         | FN868209 |
| Monocotyledons | Liliaceae     | <i>Gagea</i>      | <i>Gagea glacialis</i>         | FN868210 |
| Monocotyledons | Liliaceae     | <i>Gagea</i>      | <i>Gagea granatellii</i>       | AM265592 |
| Monocotyledons | Liliaceae     | <i>Gagea</i>      | <i>Gagea granatellii</i>       | AM282988 |
| Monocotyledons | Liliaceae     | <i>Gagea</i>      | <i>Gagea granatellii</i>       | AM282989 |
| Monocotyledons | Liliaceae     | <i>Gagea</i>      | <i>Gagea granatellii</i>       | AM282990 |
| Monocotyledons | Liliaceae     | <i>Gagea</i>      | <i>Gagea stipitata</i>         | AM265594 |
| Monocotyledons | Liliaceae     | <i>Gagea</i>      | <i>Gagea stipitata</i>         | EU939268 |
| Monocotyledons | Liliaceae     | <i>Gagea</i>      | <i>Gagea stipitata</i>         | EU939269 |
| Monocotyledons | Liliaceae     | <i>Gagea</i>      | <i>Gagea stipitata</i>         | EU939270 |
| Monocotyledons | Liliaceae     | <i>Gagea</i>      | <i>Gagea stipitata</i>         | EU939271 |
| Monocotyledons | Liliaceae     | <i>Gagea</i>      | <i>Gagea sicula</i>            | AM409350 |
| Monocotyledons | Liliaceae     | <i>Gagea</i>      | <i>Gagea sicula</i>            | AM409351 |
| Monocotyledons | Liliaceae     | <i>Gagea</i>      | <i>Gagea fragifera</i>         | AM282994 |
| Monocotyledons | Liliaceae     | <i>Gagea</i>      | <i>Gagea fragifera</i>         | AM282995 |
| Monocotyledons | Liliaceae     | <i>Gagea</i>      | <i>Gagea fragifera</i>         | EU939243 |
| Monocotyledons | Liliaceae     | <i>Gagea</i>      | <i>Gagea fragifera</i>         | EU939244 |
| Monocotyledons | Liliaceae     | <i>Gagea</i>      | <i>Gagea fragifera</i>         | EU939245 |
| Monocotyledons | Liliaceae     | <i>Gagea</i>      | <i>Gagea fragifera</i>         | FN868197 |
| Monocotyledons | Liliaceae     | <i>Gagea</i>      | <i>Gagea fragifera</i>         | FN868198 |
| Monocotyledons | Liliaceae     | <i>Gagea</i>      | <i>Gagea fragifera</i>         | FN868199 |
| Monocotyledons | Liliaceae     | <i>Gagea</i>      | <i>Gagea fragifera</i>         | FN868200 |
| Monocotyledons | Liliaceae     | <i>Gagea</i>      | <i>Gagea fragifera</i>         | FN868201 |
| Monocotyledons | Liliaceae     | <i>Gagea</i>      | <i>Gagea fragifera</i>         | FN868202 |
| Monocotyledons | Liliaceae     | <i>Gagea</i>      | <i>Gagea polidorii</i>         | AM282999 |
| Monocotyledons | Liliaceae     | <i>Gagea</i>      | <i>Gagea polidorii</i>         | FN868211 |
| Monocotyledons | Liliaceae     | <i>Gagea</i>      | <i>Gagea polidorii</i>         | FN868212 |
| Monocotyledons | Poaceae       | <i>Pappostipa</i> | <i>Pappostipa vaginata</i>     | EU489283 |
| Monocotyledons | Poaceae       | <i>Pappostipa</i> | <i>Pappostipa vaginata</i>     | EU489284 |
| Monocotyledons | Poaceae       | <i>Pappostipa</i> | <i>Pappostipa vaginata</i>     | EU204749 |
| Monocotyledons | Poaceae       | <i>Pappostipa</i> | <i>Pappostipa vaginata</i>     | EU204750 |
| Monocotyledons | Liliaceae     | <i>Gagea</i>      | <i>Gagea soleirolii</i>        | AM409352 |
| Monocotyledons | Liliaceae     | <i>Gagea</i>      | <i>Gagea soleirolii</i>        | EU939297 |
| Monocotyledons | Zingiberaceae | <i>Curcuma</i>    | <i>Curcuma attenuata</i>       | GQ248279 |
| Monocotyledons | Zingiberaceae | <i>Curcuma</i>    | <i>Curcuma attenuata</i>       | EF590683 |
| Monocotyledons | Poaceae       | <i>Pappostipa</i> | <i>Pappostipa chrysophylla</i> | EU489257 |
| Monocotyledons | Poaceae       | <i>Pappostipa</i> | <i>Pappostipa chrysophylla</i> | EU489258 |
| Monocotyledons | Poaceae       | <i>Pappostipa</i> | <i>Pappostipa chrysophylla</i> | EU489259 |
| Monocotyledons | Poaceae       | <i>Pappostipa</i> | <i>Pappostipa chrysophylla</i> | EU204729 |
| Monocotyledons | Poaceae       | <i>Pappostipa</i> | <i>Pappostipa chrysophylla</i> | EU204730 |
| Monocotyledons | Poaceae       | <i>Pappostipa</i> | <i>Pappostipa speciosa</i>     | EU489279 |
| Monocotyledons | Poaceae       | <i>Pappostipa</i> | <i>Pappostipa speciosa</i>     | EU489281 |
| Monocotyledons | Poaceae       | <i>Pappostipa</i> | <i>Pappostipa speciosa</i>     | EU489282 |
| Monocotyledons | Poaceae       | <i>Pappostipa</i> | <i>Pappostipa speciosa</i>     | EU204736 |
| Monocotyledons | Poaceae       | <i>Pappostipa</i> | <i>Pappostipa speciosa</i>     | EU204737 |
| Monocotyledons | Poaceae       | <i>Pappostipa</i> | <i>Pappostipa speciosa</i>     | EU204738 |
| Monocotyledons | Poaceae       | <i>Pappostipa</i> | <i>Pappostipa speciosa</i>     | EU204739 |
| Monocotyledons | Poaceae       | <i>Pappostipa</i> | <i>Pappostipa speciosa</i>     | EU204740 |
| Monocotyledons | Poaceae       | <i>Pappostipa</i> | <i>Pappostipa speciosa</i>     | EU204741 |
| Monocotyledons | Poaceae       | <i>Pappostipa</i> | <i>Pappostipa speciosa</i>     | EU204742 |
| Monocotyledons | Poaceae       | <i>Pappostipa</i> | <i>Pappostipa speciosa</i>     | EU204744 |
| Monocotyledons | Poaceae       | <i>Pappostipa</i> | <i>Pappostipa speciosa</i>     | EU204745 |
| Monocotyledons | Poaceae       | <i>Pappostipa</i> | <i>Pappostipa major</i>        | EU204743 |





|                |               |                      |                                      |          |
|----------------|---------------|----------------------|--------------------------------------|----------|
| Monocotyledons | Liliaceae     | <i>Gagea</i>         | <i>Gagea setifolia</i>               | EU939263 |
| Monocotyledons | Liliaceae     | <i>Gagea</i>         | <i>Gagea setifolia</i>               | EU939264 |
| Monocotyledons | Liliaceae     | <i>Gagea</i>         | <i>Gagea setifolia</i>               | EU939265 |
| Monocotyledons | Liliaceae     | <i>Gagea</i>         | <i>Gagea setifolia</i>               | EU939266 |
| Monocotyledons | Liliaceae     | <i>Gagea</i>         | <i>Gagea setifolia</i>               | EU939267 |
| Monocotyledons | Liliaceae     | <i>Gagea</i>         | <i>Gagea uliginosa</i>               | EU939281 |
| Monocotyledons | Liliaceae     | <i>Gagea</i>         | <i>Gagea uliginosa</i>               | EU939282 |
| Monocotyledons | Liliaceae     | <i>Gagea</i>         | <i>Gagea uliginosa</i>               | EU939283 |
| Monocotyledons | Liliaceae     | <i>Gagea</i>         | <i>Gagea lojaconoi</i>               | AM282997 |
| Monocotyledons | Liliaceae     | <i>Gagea</i>         | <i>Gagea lojaconoi</i>               | AM282998 |
| Monocotyledons | Hyacinthaceae | <i>Hyacinthoides</i> | <i>Hyacinthoides ciliolata</i>       | FJ423299 |
| Monocotyledons | Hyacinthaceae | <i>Hyacinthoides</i> | <i>Hyacinthoides ciliolata</i>       | FJ423300 |
| Monocotyledons | Hyacinthaceae | <i>Hyacinthoides</i> | <i>Hyacinthoides ciliolata</i>       | FJ423301 |
| Monocotyledons | Hyacinthaceae | <i>Hyacinthoides</i> | <i>Hyacinthoides flahaultiana</i>    | FJ423313 |
| Monocotyledons | Hyacinthaceae | <i>Hyacinthoides</i> | <i>Hyacinthoides flahaultiana</i>    | FJ423314 |
| Monocotyledons | Hyacinthaceae | <i>Hyacinthoides</i> | <i>Hyacinthoides flahaultiana</i>    | FJ423315 |
| Monocotyledons | Hyacinthaceae | <i>Hyacinthoides</i> | <i>Hyacinthoides mauritanica</i>     | FJ423309 |
| Monocotyledons | Hyacinthaceae | <i>Hyacinthoides</i> | <i>Hyacinthoides mauritanica</i>     | FJ423310 |
| Monocotyledons | Hyacinthaceae | <i>Hyacinthoides</i> | <i>Hyacinthoides mauritanica</i>     | FJ423311 |
| Monocotyledons | Hyacinthaceae | <i>Hyacinthoides</i> | <i>Hyacinthoides mauritanica</i>     | FJ423312 |
| Monocotyledons | Hyacinthaceae | <i>Hyacinthoides</i> | <i>Hyacinthoides paivae</i>          | FJ423346 |
| Monocotyledons | Hyacinthaceae | <i>Hyacinthoides</i> | <i>Hyacinthoides paivae</i>          | FJ423347 |
| Monocotyledons | Liliaceae     | <i>Gagea</i>         | <i>Gagea brentae</i>                 | FN868195 |
| Monocotyledons | Liliaceae     | <i>Gagea</i>         | <i>Gagea brentae</i>                 | FN868196 |
| Monocotyledons | Zingiberaceae | <i>Kaempferia</i>    | <i>Kaempferia</i> sp. JT-2010a       | GQ385994 |
| Monocotyledons | Zingiberaceae | <i>Kaempferia</i>    | <i>Kaempferia</i> sp. JT-2010a       | GQ385995 |
| Monocotyledons | Zingiberaceae | <i>Kaempferia</i>    | <i>Kaempferia</i> sp. JT-2010b       | GQ385998 |
| Monocotyledons | Zingiberaceae | <i>Kaempferia</i>    | <i>Kaempferia</i> sp. JT-2010b       | GQ385999 |
| Monocotyledons | Zingiberaceae | <i>Kaempferia</i>    | <i>Kaempferia fallax</i>             | GQ386018 |
| Monocotyledons | Zingiberaceae | <i>Kaempferia</i>    | <i>Kaempferia fallax</i>             | GQ386019 |
| Monocotyledons | Zingiberaceae | <i>Kaempferia</i>    | <i>Kaempferia fallax</i>             | GQ386020 |
| Monocotyledons | Zingiberaceae | <i>Kaempferia</i>    | <i>Kaempferia fallax</i>             | GQ386021 |
| Monocotyledons | Zingiberaceae | <i>Kaempferia</i>    | <i>Kaempferia filifolia</i>          | GQ386022 |
| Monocotyledons | Zingiberaceae | <i>Kaempferia</i>    | <i>Kaempferia filifolia</i>          | GQ386023 |
| Monocotyledons | Zingiberaceae | <i>Kaempferia</i>    | <i>Kaempferia filifolia</i>          | GQ386024 |
| Monocotyledons | Zingiberaceae | <i>Kaempferia</i>    | <i>Kaempferia laotica</i>            | GQ385985 |
| Monocotyledons | Zingiberaceae | <i>Kaempferia</i>    | <i>Kaempferia laotica</i>            | GQ385987 |
| Monocotyledons | Zingiberaceae | <i>Kaempferia</i>    | <i>Kaempferia larsenii</i>           | GQ385989 |
| Monocotyledons | Zingiberaceae | <i>Kaempferia</i>    | <i>Kaempferia larsenii</i>           | GQ385990 |
| Monocotyledons | Zingiberaceae | <i>Kaempferia</i>    | <i>Kaempferia larsenii</i>           | GQ385991 |
| Monocotyledons | Zingiberaceae | <i>Kaempferia</i>    | <i>Kaempferia larsenii</i>           | GQ385992 |
| Monocotyledons | Zingiberaceae | <i>Kaempferia</i>    | <i>Kaempferia larsenii</i>           | GQ385993 |
| Monocotyledons | Zingiberaceae | <i>Kaempferia</i>    | <i>Kaempferia</i> sp. JT-2010c       | GQ386043 |
| Monocotyledons | Zingiberaceae | <i>Kaempferia</i>    | <i>Kaempferia</i> sp. JT-2010c       | GQ386044 |
| Monocotyledons | Zingiberaceae | <i>Kaempferia</i>    | <i>Kaempferia</i> sp. JT-2010c       | GQ386045 |
| Monocotyledons | Zingiberaceae | <i>Kaempferia</i>    | <i>Kaempferia</i> sp. JT-2010c       | GQ386046 |
| Monocotyledons | Zingiberaceae | <i>Kaempferia</i>    | <i>Kaempferia</i> sp. JT-2010d       | GQ385996 |
| Monocotyledons | Zingiberaceae | <i>Kaempferia</i>    | <i>Kaempferia</i> sp. JT-2010d       | GQ385997 |
| Monocotyledons | Zingiberaceae | <i>Kaempferia</i>    | <i>Kaempferia siamensis</i>          | GQ386039 |
| Monocotyledons | Zingiberaceae | <i>Kaempferia</i>    | <i>Kaempferia siamensis</i>          | GQ386040 |
| Monocotyledons | Zingiberaceae | <i>Kaempferia</i>    | <i>Kaempferia</i> sp. nov. 1 JT-2010 | GQ386001 |
| Monocotyledons | Zingiberaceae | <i>Kaempferia</i>    | <i>Kaempferia</i> sp. nov. 1 JT-2010 | GQ386002 |
| Monocotyledons | Liliaceae     | <i>Gagea</i>         | <i>Gagea davlianidzeae</i>           | FR690831 |

|                |           |                  |                                |          |
|----------------|-----------|------------------|--------------------------------|----------|
| Monocotyledons | Liliaceae | <i>Gagea</i>     | <i>Gagea davlianidzeae</i>     | FR690832 |
| Monocotyledons | Liliaceae | <i>Gagea</i>     | <i>Gagea davlianidzeae</i>     | FR690833 |
| Monocotyledons | Liliaceae | <i>Gagea</i>     | <i>Gagea davlianidzeae</i>     | FR690834 |
| Monocotyledons | Liliaceae | <i>Gagea</i>     | <i>Gagea davlianidzeae</i>     | FR690835 |
| Monocotyledons | Liliaceae | <i>Gagea</i>     | <i>Gagea davlianidzeae</i>     | FR690836 |
| Monocotyledons | Liliaceae | <i>Gagea</i>     | <i>Gagea davlianidzeae</i>     | FR690837 |
| Monocotyledons | Liliaceae | <i>Gagea</i>     | <i>Gagea rufidula</i>          | FR690840 |
| Monocotyledons | Liliaceae | <i>Gagea</i>     | <i>Gagea rufidula</i>          | FR690841 |
| Monocotyledons | Liliaceae | <i>Gagea</i>     | <i>Gagea rufidula</i>          | FR690842 |
| Monocotyledons | Liliaceae | <i>Gagea</i>     | <i>Gagea rufidula</i>          | FR690843 |
| Monocotyledons | Liliaceae | <i>Gagea</i>     | <i>Gagea nigra</i>             | FR691010 |
| Monocotyledons | Liliaceae | <i>Gagea</i>     | <i>Gagea nigra</i>             | FR691011 |
| Monocotyledons | Liliaceae | <i>Gagea</i>     | <i>Gagea nigra</i>             | FR691012 |
| Monocotyledons | Liliaceae | <i>Gagea</i>     | <i>Gagea nigra</i>             | FR691013 |
| Monocotyledons | Liliaceae | <i>Gagea</i>     | <i>Gagea nigra</i>             | FR691014 |
| Monocotyledons | Liliaceae | <i>Gagea</i>     | <i>Gagea nigra</i>             | FR691015 |
| Monocotyledons | Liliaceae | <i>Gagea</i>     | <i>Gagea nigra</i>             | FR691016 |
| Monocotyledons | Liliaceae | <i>Gagea</i>     | <i>Gagea nigra</i>             | FR691017 |
| Monocotyledons | Liliaceae | <i>Gagea</i>     | <i>Gagea nigra</i>             | FR691018 |
| Monocotyledons | Liliaceae | <i>Gagea</i>     | <i>Gagea nigra</i>             | FR691019 |
| Monocotyledons | Liliaceae | <i>Gagea</i>     | <i>Gagea nigra</i>             | FR691020 |
| Monocotyledons | Liliaceae | <i>Gagea</i>     | <i>Gagea nigra</i>             | FR691021 |
| Monocotyledons | Liliaceae | <i>Gagea</i>     | <i>Gagea nigra</i>             | FR691022 |
| Monocotyledons | Liliaceae | <i>Gagea</i>     | <i>Gagea nigra</i>             | FR691023 |
| Monocotyledons | Liliaceae | <i>Gagea</i>     | <i>Gagea nigra</i>             | FR691024 |
| Monocotyledons | Liliaceae | <i>Gagea</i>     | <i>Gagea xiphoidea</i>         | FR691044 |
| Monocotyledons | Liliaceae | <i>Gagea</i>     | <i>Gagea xiphoidea</i>         | FR691045 |
| Monocotyledons | Liliaceae | <i>Gagea</i>     | <i>Gagea angelae</i>           | FR691028 |
| Monocotyledons | Liliaceae | <i>Gagea</i>     | <i>Gagea angelae</i>           | FR691029 |
| Monocotyledons | Liliaceae | <i>Gagea</i>     | <i>Gagea angelae</i>           | FR691030 |
| Monocotyledons | Liliaceae | <i>Gagea</i>     | <i>Gagea angelae</i>           | FR691031 |
| Monocotyledons | Liliaceae | <i>Gagea</i>     | <i>Gagea angelae</i>           | FR691032 |
| Monocotyledons | Liliaceae | <i>Gagea</i>     | <i>Gagea angelae</i>           | FR691033 |
| Monocotyledons | Liliaceae | <i>Gagea</i>     | <i>Gagea angelae</i>           | FR691034 |
| Monocotyledons | Liliaceae | <i>Gagea</i>     | <i>Gagea angelae</i>           | FR691035 |
| Monocotyledons | Liliaceae | <i>Gagea</i>     | <i>Gagea angelae</i>           | FR691036 |
| Monocotyledons | Liliaceae | <i>Gagea</i>     | <i>Gagea angelae</i>           | FR691037 |
| Monocotyledons | Liliaceae | <i>Gagea</i>     | <i>Gagea huochengensis</i>     | FR691038 |
| Monocotyledons | Liliaceae | <i>Gagea</i>     | <i>Gagea huochengensis</i>     | FR691039 |
| Monocotyledons | Liliaceae | <i>Gagea</i>     | <i>Gagea huochengensis</i>     | FR691040 |
| Monocotyledons | Liliaceae | <i>Gagea</i>     | <i>Gagea huochengensis</i>     | FR691041 |
| Monocotyledons | Liliaceae | <i>Gagea</i>     | <i>Gagea huochengensis</i>     | FR691042 |
| Monocotyledons | Liliaceae | <i>Gagea</i>     | <i>Gagea huochengensis</i>     | FR691043 |
| Monocotyledons | Liliaceae | <i>Gagea</i>     | <i>Gagea jensii</i>            | FR691025 |
| Monocotyledons | Liliaceae | <i>Gagea</i>     | <i>Gagea jensii</i>            | FR691026 |
| Monocotyledons | Liliaceae | <i>Gagea</i>     | <i>Gagea jensii</i>            | FR691027 |
| Monocotyledons | Poaceae   | <i>Digitaria</i> | <i>Digitaria macroblephara</i> | HQ876950 |
| Monocotyledons | Poaceae   | <i>Digitaria</i> | <i>Digitaria macroblephara</i> | HQ876951 |
| Monocotyledons | Poaceae   | <i>Digitaria</i> | <i>Digitaria macroblephara</i> | HQ876952 |
| Monocotyledons | Poaceae   | <i>Digitaria</i> | <i>Digitaria abyssinica</i>    | HQ876953 |
| Monocotyledons | Poaceae   | <i>Digitaria</i> | <i>Digitaria abyssinica</i>    | HQ876954 |
| Monocotyledons | Poaceae   | <i>Digitaria</i> | <i>Digitaria ternata</i>       | HQ876955 |
| Monocotyledons | Poaceae   | <i>Digitaria</i> | <i>Digitaria ternata</i>       | HQ876956 |

|                |                |                    |                             |          |
|----------------|----------------|--------------------|-----------------------------|----------|
| Monocotyledons | Zingiberaceae  | <i>Alpinia</i>     | <i>Alpinia emaculata</i>    | JN043831 |
| Monocotyledons | Zingiberaceae  | <i>Alpinia</i>     | <i>Alpinia emaculata</i>    | JN043832 |
| Monocotyledons | Zingiberaceae  | <i>Alpinia</i>     | <i>Alpinia platytilus</i>   | JN043867 |
| Monocotyledons | Zingiberaceae  | <i>Alpinia</i>     | <i>Alpinia platytilus</i>   | JN043868 |
| Monocotyledons | Zingiberaceae  | <i>Alpinia</i>     | <i>Alpinia platytilus</i>   | JN043869 |
| Monocotyledons | Zingiberaceae  | <i>Alpinia</i>     | <i>Alpinia platytilus</i>   | JN043870 |
| Monocotyledons | Zingiberaceae  | <i>Alpinia</i>     | <i>Alpinia graminifolia</i> | JN043844 |
| Monocotyledons | Zingiberaceae  | <i>Alpinia</i>     | <i>Alpinia graminifolia</i> | JN043845 |
| Mosses         | Polytrichaceae | <i>Polytrichum</i> | <i>Polytrichum commune</i>  | EU750671 |
| Mosses         | Polytrichaceae | <i>Polytrichum</i> | <i>Polytrichum commune</i>  | EU750672 |
| Mosses         | Polytrichaceae | <i>Polytrichum</i> | <i>Polytrichum commune</i>  | EF590730 |
| Mosses         | Dicranaceae    | <i>Dicranum</i>    | <i>Dicranum scoparium</i>   | GQ428018 |
| Mosses         | Dicranaceae    | <i>Dicranum</i>    | <i>Dicranum scoparium</i>   | GQ428016 |
| Mosses         | Dicranaceae    | <i>Dicranum</i>    | <i>Dicranum scoparium</i>   | GQ428012 |
| Mosses         | Dicranaceae    | <i>Dicranum</i>    | <i>Dicranum scoparium</i>   | GQ428010 |
| Mosses         | Dicranaceae    | <i>Dicranum</i>    | <i>Dicranum scoparium</i>   | GQ428008 |
| Mosses         | Dicranaceae    | <i>Dicranum</i>    | <i>Dicranum scoparium</i>   | GQ428006 |
| Mosses         | Dicranaceae    | <i>Dicranum</i>    | <i>Dicranum scoparium</i>   | GQ428004 |
| Mosses         | Dicranaceae    | <i>Dicranum</i>    | <i>Dicranum scoparium</i>   | GQ428002 |
| Mosses         | Dicranaceae    | <i>Dicranum</i>    | <i>Dicranum scoparium</i>   | GQ428000 |
| Mosses         | Dicranaceae    | <i>Dicranum</i>    | <i>Dicranum scoparium</i>   | GQ427998 |
| Mosses         | Dicranaceae    | <i>Dicranum</i>    | <i>Dicranum scoparium</i>   | GQ427996 |
| Mosses         | Dicranaceae    | <i>Dicranum</i>    | <i>Dicranum scoparium</i>   | GQ427994 |
| Mosses         | Dicranaceae    | <i>Dicranum</i>    | <i>Dicranum scoparium</i>   | GQ427992 |
| Mosses         | Dicranaceae    | <i>Dicranum</i>    | <i>Dicranum scoparium</i>   | GQ428017 |
| Mosses         | Dicranaceae    | <i>Dicranum</i>    | <i>Dicranum scoparium</i>   | GQ428015 |
| Mosses         | Dicranaceae    | <i>Dicranum</i>    | <i>Dicranum scoparium</i>   | GQ428013 |
| Mosses         | Dicranaceae    | <i>Dicranum</i>    | <i>Dicranum scoparium</i>   | GQ428011 |
| Mosses         | Dicranaceae    | <i>Dicranum</i>    | <i>Dicranum scoparium</i>   | GQ428009 |
| Mosses         | Dicranaceae    | <i>Dicranum</i>    | <i>Dicranum scoparium</i>   | GQ428007 |
| Mosses         | Dicranaceae    | <i>Dicranum</i>    | <i>Dicranum scoparium</i>   | GQ428005 |
| Mosses         | Dicranaceae    | <i>Dicranum</i>    | <i>Dicranum scoparium</i>   | GQ428003 |
| Mosses         | Dicranaceae    | <i>Dicranum</i>    | <i>Dicranum scoparium</i>   | GQ428001 |
| Mosses         | Dicranaceae    | <i>Dicranum</i>    | <i>Dicranum scoparium</i>   | GQ427999 |
| Mosses         | Dicranaceae    | <i>Dicranum</i>    | <i>Dicranum scoparium</i>   | GQ427997 |
| Mosses         | Dicranaceae    | <i>Dicranum</i>    | <i>Dicranum scoparium</i>   | GQ427995 |
| Mosses         | Dicranaceae    | <i>Dicranum</i>    | <i>Dicranum scoparium</i>   | GQ427993 |
| Mosses         | Dicranaceae    | <i>Dicranum</i>    | <i>Dicranum scoparium</i>   | GQ427991 |
| Mosses         | Dicranaceae    | <i>Dicranum</i>    | <i>Dicranum scoparium</i>   | GQ248289 |
| Mosses         | Dicranaceae    | <i>Dicranum</i>    | <i>Dicranum scoparium</i>   | GU068473 |
| Mosses         | Dicranaceae    | <i>Dicranum</i>    | <i>Dicranum scoparium</i>   | GU068471 |
| Mosses         | Dicranaceae    | <i>Dicranum</i>    | <i>Dicranum scoparium</i>   | GU068469 |
| Mosses         | Dicranaceae    | <i>Dicranum</i>    | <i>Dicranum scoparium</i>   | GU068467 |
| Mosses         | Dicranaceae    | <i>Dicranum</i>    | <i>Dicranum scoparium</i>   | GU068465 |
| Mosses         | Dicranaceae    | <i>Dicranum</i>    | <i>Dicranum scoparium</i>   | GU068463 |
| Mosses         | Dicranaceae    | <i>Dicranum</i>    | <i>Dicranum scoparium</i>   | GU068461 |
| Mosses         | Dicranaceae    | <i>Dicranum</i>    | <i>Dicranum scoparium</i>   | GU068459 |
| Mosses         | Dicranaceae    | <i>Dicranum</i>    | <i>Dicranum scoparium</i>   | GU068457 |
| Mosses         | Dicranaceae    | <i>Dicranum</i>    | <i>Dicranum scoparium</i>   | GU068455 |
| Mosses         | Dicranaceae    | <i>Dicranum</i>    | <i>Dicranum scoparium</i>   | GU068453 |
| Mosses         | Dicranaceae    | <i>Dicranum</i>    | <i>Dicranum scoparium</i>   | GU068451 |
| Mosses         | Dicranaceae    | <i>Dicranum</i>    | <i>Dicranum scoparium</i>   | GU068449 |
| Mosses         | Dicranaceae    | <i>Dicranum</i>    | <i>Dicranum scoparium</i>   | GU068474 |

|        |                  |                      |                                 |          |
|--------|------------------|----------------------|---------------------------------|----------|
| Mosses | Dicranaceae      | <i>Dicranum</i>      | <i>Dicranum scoparium</i>       | GU068472 |
| Mosses | Dicranaceae      | <i>Dicranum</i>      | <i>Dicranum scoparium</i>       | GU068470 |
| Mosses | Dicranaceae      | <i>Dicranum</i>      | <i>Dicranum scoparium</i>       | GU068468 |
| Mosses | Dicranaceae      | <i>Dicranum</i>      | <i>Dicranum scoparium</i>       | GU068466 |
| Mosses | Dicranaceae      | <i>Dicranum</i>      | <i>Dicranum scoparium</i>       | GU068464 |
| Mosses | Dicranaceae      | <i>Dicranum</i>      | <i>Dicranum scoparium</i>       | GU068462 |
| Mosses | Dicranaceae      | <i>Dicranum</i>      | <i>Dicranum scoparium</i>       | GU068460 |
| Mosses | Dicranaceae      | <i>Dicranum</i>      | <i>Dicranum scoparium</i>       | GU068458 |
| Mosses | Dicranaceae      | <i>Dicranum</i>      | <i>Dicranum scoparium</i>       | GU068456 |
| Mosses | Dicranaceae      | <i>Dicranum</i>      | <i>Dicranum scoparium</i>       | GU068454 |
| Mosses | Dicranaceae      | <i>Dicranum</i>      | <i>Dicranum scoparium</i>       | GU068452 |
| Mosses | Dicranaceae      | <i>Dicranum</i>      | <i>Dicranum scoparium</i>       | GU068450 |
| Mosses | Dicranaceae      | <i>Dicranum</i>      | <i>Dicranum scoparium</i>       | GU068448 |
| Mosses | Dicranaceae      | <i>Dicranum</i>      | <i>Dicranum scoparium</i>       | EF590690 |
| Mosses | Orthotrichaceae  | <i>Orthotrichum</i>  | <i>Orthotrichum stramineum</i>  | EU163553 |
| Mosses | Orthotrichaceae  | <i>Orthotrichum</i>  | <i>Orthotrichum stramineum</i>  | FJ036891 |
| Mosses | Orthotrichaceae  | <i>Orthotrichum</i>  | <i>Orthotrichum stramineum</i>  | FJ036889 |
| Mosses | Orthotrichaceae  | <i>Orthotrichum</i>  | <i>Orthotrichum stramineum</i>  | FJ036890 |
| Mosses | Brachytheciaceae | <i>Brachythecium</i> | <i>Brachythecium rutabulum</i>  | GQ428022 |
| Mosses | Brachytheciaceae | <i>Brachythecium</i> | <i>Brachythecium rutabulum</i>  | FJ572511 |
| Mosses | Brachytheciaceae | <i>Brachythecium</i> | <i>Brachythecium rutabulum</i>  | FJ572512 |
| Mosses | Hypnaceae        | <i>Hypnum</i>        | <i>Hypnum cupressiforme</i>     | GQ849569 |
| Mosses | Hypnaceae        | <i>Hypnum</i>        | <i>Hypnum cupressiforme</i>     | GQ849570 |
| Mosses | Hypnaceae        | <i>Hypnum</i>        | <i>Hypnum cupressiforme</i>     | GQ849568 |
| Mosses | Orthotrichaceae  | <i>Orthotrichum</i>  | <i>Orthotrichum anomalum</i>    | EU163551 |
| Mosses | Orthotrichaceae  | <i>Orthotrichum</i>  | <i>Orthotrichum anomalum</i>    | GQ370333 |
| Mosses | Orthotrichaceae  | <i>Orthotrichum</i>  | <i>Orthotrichum lyellii</i>     | AY312911 |
| Mosses | Orthotrichaceae  | <i>Orthotrichum</i>  | <i>Orthotrichum lyellii</i>     | FJ036875 |
| Mosses | Orthotrichaceae  | <i>Orthotrichum</i>  | <i>Orthotrichum lyellii</i>     | FJ036873 |
| Mosses | Orthotrichaceae  | <i>Orthotrichum</i>  | <i>Orthotrichum lyellii</i>     | FJ036874 |
| Mosses | Orthotrichaceae  | <i>Orthotrichum</i>  | <i>Orthotrichum lyellii</i>     | FJ036872 |
| Mosses | Orthotrichaceae  | <i>Nyholmiella</i>   | <i>Nyholmiella obtusifolia</i>  | GQ370351 |
| Mosses | Orthotrichaceae  | <i>Nyholmiella</i>   | <i>Nyholmiella obtusifolia</i>  | GQ370349 |
| Mosses | Orthotrichaceae  | <i>Nyholmiella</i>   | <i>Nyholmiella obtusifolia</i>  | GQ370350 |
| Mosses | Orthotrichaceae  | <i>Nyholmiella</i>   | <i>Nyholmiella obtusifolia</i>  | GQ370348 |
| Mosses | Grimmiaceae      | <i>Schistidium</i>   | <i>Schistidium apocarpum</i>    | GU808911 |
| Mosses | Grimmiaceae      | <i>Schistidium</i>   | <i>Schistidium apocarpum</i>    | GU808918 |
| Mosses | Grimmiaceae      | <i>Schistidium</i>   | <i>Schistidium apocarpum</i>    | GU808912 |
| Mosses | Grimmiaceae      | <i>Schistidium</i>   | <i>Schistidium apocarpum</i>    | EU163518 |
| Mosses | Grimmiaceae      | <i>Schistidium</i>   | <i>Schistidium apocarpum</i>    | GQ428033 |
| Mosses | Mniaceae         | <i>Plagiomnium</i>   | <i>Plagiomnium cuspidatum</i>   | FJ572549 |
| Mosses | Mniaceae         | <i>Plagiomnium</i>   | <i>Plagiomnium cuspidatum</i>   | FJ572547 |
| Mosses | Mniaceae         | <i>Plagiomnium</i>   | <i>Plagiomnium cuspidatum</i>   | FJ572548 |
| Mosses | Mniaceae         | <i>Plagiomnium</i>   | <i>Plagiomnium cuspidatum</i>   | EU750667 |
| Mosses | Mniaceae         | <i>Plagiomnium</i>   | <i>Plagiomnium cuspidatum</i>   | EU750668 |
| Mosses | Orthotrichaceae  | <i>Orthotrichum</i>  | <i>Orthotrichum speciosum</i>   | FJ036865 |
| Mosses | Orthotrichaceae  | <i>Orthotrichum</i>  | <i>Orthotrichum speciosum</i>   | FJ036863 |
| Mosses | Orthotrichaceae  | <i>Orthotrichum</i>  | <i>Orthotrichum speciosum</i>   | FJ036866 |
| Mosses | Orthotrichaceae  | <i>Orthotrichum</i>  | <i>Orthotrichum speciosum</i>   | FJ036864 |
| Mosses | Brachytheciaceae | <i>Brachythecium</i> | <i>Brachythecium salebrosum</i> | FJ572513 |
| Mosses | Brachytheciaceae | <i>Brachythecium</i> | <i>Brachythecium salebrosum</i> | FJ572514 |
| Mosses | Brachytheciaceae | <i>Brachythecium</i> | <i>Brachythecium salebrosum</i> | AY312896 |
| Mosses | Brachytheciaceae | <i>Brachythecium</i> | <i>Brachythecium salebrosum</i> | EU750661 |



|        |                  |                      |                                  |          |
|--------|------------------|----------------------|----------------------------------|----------|
| Mosses | Brachytheciaceae | <i>Brachythecium</i> | <i>Brachythecium salebrosum</i>  | EU750660 |
| Mosses | Brachytheciaceae | <i>Brachythecium</i> | <i>Brachythecium oxycladon</i>   | EU750657 |
| Mosses | Brachytheciaceae | <i>Brachythecium</i> | <i>Brachythecium oxycladon</i>   | EU750656 |
| Mosses | Brachytheciaceae | <i>Brachythecium</i> | <i>Brachythecium plumosum</i>    | FJ572509 |
| Mosses | Brachytheciaceae | <i>Brachythecium</i> | <i>Brachythecium plumosum</i>    | FJ572510 |
| Mosses | Ptychomniaceae   | <i>Ptychomnion</i>   | <i>Ptychomnion aciculare</i>     | EU125860 |
| Mosses | Ptychomniaceae   | <i>Ptychomnion</i>   | <i>Ptychomnion aciculare</i>     | EU125859 |
| Mosses | Mniaceae         | <i>Plagiomnium</i>   | <i>Plagiomnium undulatum</i>     | EU163539 |
| Mosses | Mniaceae         | <i>Plagiomnium</i>   | <i>Plagiomnium undulatum</i>     | GQ428032 |
| Mosses | Dicranaceae      | <i>Dicranum</i>      | <i>Dicranum polysetum</i>        | EU163523 |
| Mosses | Dicranaceae      | <i>Dicranum</i>      | <i>Dicranum polysetum</i>        | EU750665 |
| Mosses | Dicranaceae      | <i>Dicranum</i>      | <i>Dicranum polysetum</i>        | EU750666 |
| Mosses | Sphagnaceae      | <i>Sphagnum</i>      | <i>Sphagnum quinquefarium</i>    | AY309617 |
| Mosses | Sphagnaceae      | <i>Sphagnum</i>      | <i>Sphagnum quinquefarium</i>    | GQ428034 |
| Mosses | Polytrichaceae   | <i>Polytrichum</i>   | <i>Polytrichum juniperinum</i>   | GQ248374 |
| Mosses | Polytrichaceae   | <i>Polytrichum</i>   | <i>Polytrichum juniperinum</i>   | FJ572555 |
| Mosses | Polytrichaceae   | <i>Polytrichum</i>   | <i>Polytrichum juniperinum</i>   | FJ572554 |
| Mosses | Polytrichaceae   | <i>Polytrichum</i>   | <i>Polytrichum juniperinum</i>   | EU750675 |
| Mosses | Polytrichaceae   | <i>Polytrichum</i>   | <i>Polytrichum juniperinum</i>   | EU750673 |
| Mosses | Polytrichaceae   | <i>Polytrichum</i>   | <i>Polytrichum juniperinum</i>   | EU750674 |
| Mosses | Polytrichaceae   | <i>Polytrichum</i>   | <i>Polytrichum juniperinum</i>   | EF590731 |
| Mosses | Grimmiaceae      | <i>Grimmia</i>       | <i>Grimmia laevigata</i>         | GU808929 |
| Mosses | Grimmiaceae      | <i>Grimmia</i>       | <i>Grimmia laevigata</i>         | GU808942 |
| Mosses | Grimmiaceae      | <i>Codriophorus</i>  | <i>Codriophorus fascicularis</i> | GU808889 |
| Mosses | Grimmiaceae      | <i>Codriophorus</i>  | <i>Codriophorus fascicularis</i> | GU808887 |
| Mosses | Grimmiaceae      | <i>Codriophorus</i>  | <i>Codriophorus fascicularis</i> | GU808890 |
| Mosses | Grimmiaceae      | <i>Codriophorus</i>  | <i>Codriophorus fascicularis</i> | GU808888 |
| Mosses | Grimmiaceae      | <i>Codriophorus</i>  | <i>Codriophorus fascicularis</i> | FJ572563 |
| Mosses | Grimmiaceae      | <i>Codriophorus</i>  | <i>Codriophorus fascicularis</i> | FJ572562 |
| Mosses | Sphagnaceae      | <i>Sphagnum</i>      | <i>Sphagnum subsecundum</i>      | FJ572571 |
| Mosses | Sphagnaceae      | <i>Sphagnum</i>      | <i>Sphagnum subsecundum</i>      | FJ572572 |
| Mosses | Ptychomniaceae   | <i>Ptychomnion</i>   | <i>Ptychomnion cygnisetum</i>    | EU125862 |
| Mosses | Ptychomniaceae   | <i>Ptychomnion</i>   | <i>Ptychomnion cygnisetum</i>    | EU125863 |
| Mosses | Ptychomniaceae   | <i>Ptychomnion</i>   | <i>Ptychomnion cygnisetum</i>    | EU125861 |
| Mosses | Grimmiaceae      | <i>Grimmia</i>       | <i>Grimmia pilifera</i>          | GU808937 |
| Mosses | Grimmiaceae      | <i>Grimmia</i>       | <i>Grimmia pilifera</i>          | GU808935 |
| Mosses | Grimmiaceae      | <i>Grimmia</i>       | <i>Grimmia pilifera</i>          | GU808938 |
| Mosses | Grimmiaceae      | <i>Grimmia</i>       | <i>Grimmia pilifera</i>          | GU808936 |
| Mosses | Grimmiaceae      | <i>Grimmia</i>       | <i>Grimmia pilifera</i>          | GU808934 |
| Mosses | Grimmiaceae      | <i>Niphotrichum</i>  | <i>Niphotrichum japonicum</i>    | GU808901 |
| Mosses | Grimmiaceae      | <i>Niphotrichum</i>  | <i>Niphotrichum japonicum</i>    | GU808899 |
| Mosses | Grimmiaceae      | <i>Niphotrichum</i>  | <i>Niphotrichum japonicum</i>    | GU808897 |
| Mosses | Grimmiaceae      | <i>Niphotrichum</i>  | <i>Niphotrichum japonicum</i>    | GU808902 |
| Mosses | Grimmiaceae      | <i>Niphotrichum</i>  | <i>Niphotrichum japonicum</i>    | GU808900 |
| Mosses | Grimmiaceae      | <i>Niphotrichum</i>  | <i>Niphotrichum japonicum</i>    | GU808898 |
| Mosses | Grimmiaceae      | <i>Schistidium</i>   | <i>Schistidium strictum</i>      | GU808917 |
| Mosses | Grimmiaceae      | <i>Schistidium</i>   | <i>Schistidium strictum</i>      | GU808915 |
| Mosses | Grimmiaceae      | <i>Schistidium</i>   | <i>Schistidium strictum</i>      | GU808916 |
| Mosses | Grimmiaceae      | <i>Schistidium</i>   | <i>Schistidium strictum</i>      | GU808914 |
| Mosses | Orthotrichaceae  | <i>Orthotrichum</i>  | <i>Orthotrichum affine</i>       | FJ036879 |
| Mosses | Orthotrichaceae  | <i>Orthotrichum</i>  | <i>Orthotrichum affine</i>       | FJ036877 |
| Mosses | Orthotrichaceae  | <i>Orthotrichum</i>  | <i>Orthotrichum affine</i>       | FJ036878 |
| Mosses | Orthotrichaceae  | <i>Orthotrichum</i>  | <i>Orthotrichum affine</i>       | FJ036876 |



|        |                 |                     |                                   |          |
|--------|-----------------|---------------------|-----------------------------------|----------|
| Mosses | Grimmiaceae     | <i>Grimmia</i>      | <i>Grimmia montana</i>            | EF429387 |
| Mosses | Grimmiaceae     | <i>Grimmia</i>      | <i>Grimmia montana</i>            | EF429385 |
| Mosses | Grimmiaceae     | <i>Grimmia</i>      | <i>Grimmia montana</i>            | EF429383 |
| Mosses | Grimmiaceae     | <i>Grimmia</i>      | <i>Grimmia montana</i>            | EF429381 |
| Mosses | Grimmiaceae     | <i>Grimmia</i>      | <i>Grimmia ovalis</i>             | GU808927 |
| Mosses | Grimmiaceae     | <i>Grimmia</i>      | <i>Grimmia ovalis</i>             | GU808925 |
| Mosses | Grimmiaceae     | <i>Grimmia</i>      | <i>Grimmia ovalis</i>             | GU808926 |
| Mosses | Grimmiaceae     | <i>Grimmia</i>      | <i>Grimmia ovalis</i>             | GU808924 |
| Mosses | Grimmiaceae     | <i>Grimmia</i>      | <i>Grimmia unicolor</i>           | GU808946 |
| Mosses | Grimmiaceae     | <i>Grimmia</i>      | <i>Grimmia unicolor</i>           | GU808944 |
| Mosses | Ptychomniaceae  | <i>Ptychomnion</i>  | <i>Ptychomnion densifolium</i>    | EU125864 |
| Mosses | Ptychomniaceae  | <i>Ptychomnion</i>  | <i>Ptychomnion densifolium</i>    | EU125865 |
| Mosses | Ptychomniaceae  | <i>Ptychomnion</i>  | <i>Ptychomnion densifolium</i>    | EU125855 |
| Mosses | Ptychomniaceae  | <i>Ptychomnion</i>  | <i>Ptychomnion subaciculare</i>   | EU125858 |
| Mosses | Ptychomniaceae  | <i>Ptychomnion</i>  | <i>Ptychomnion subaciculare</i>   | EU125857 |
| Mosses | Grimmiaceae     | <i>Schistidium</i>  | <i>Schistidium trichodon</i>      | HM989829 |
| Mosses | Grimmiaceae     | <i>Schistidium</i>  | <i>Schistidium trichodon</i>      | HM989827 |
| Mosses | Orthotrichaceae | <i>Orthotrichum</i> | <i>Orthotrichum sordidum</i>      | FJ036871 |
| Mosses | Orthotrichaceae | <i>Orthotrichum</i> | <i>Orthotrichum sordidum</i>      | FJ036870 |
| Mosses | Mniaceae        | <i>Plagiomnium</i>  | <i>Plagiomnium drummondii</i>     | EU750669 |
| Mosses | Mniaceae        | <i>Plagiomnium</i>  | <i>Plagiomnium drummondii</i>     | EU750670 |
| Mosses | Dicranaceae     | <i>Dicranum</i>     | <i>Dicranum flagellare</i>        | GQ248288 |
| Mosses | Dicranaceae     | <i>Dicranum</i>     | <i>Dicranum flagellare</i>        | EU750663 |
| Mosses | Dicranaceae     | <i>Dicranum</i>     | <i>Dicranum flagellare</i>        | EU750664 |
| Mosses | Dicranaceae     | <i>Dicranum</i>     | <i>Dicranum flagellare</i>        | EU750662 |
| Mosses | Dicranaceae     | <i>Dicranum</i>     | <i>Dicranum flagellare</i>        | EF590689 |
| Mosses | Hypnaceae       | <i>Hypnum</i>       | <i>Hypnum jutlandicum</i>         | GQ849575 |
| Mosses | Hypnaceae       | <i>Hypnum</i>       | <i>Hypnum jutlandicum</i>         | GQ849574 |
| Mosses | Orthotrichaceae | <i>Orthotrichum</i> | <i>Orthotrichum fastigiatum</i>   | FJ036883 |
| Mosses | Orthotrichaceae | <i>Orthotrichum</i> | <i>Orthotrichum fastigiatum</i>   | FJ036881 |
| Mosses | Orthotrichaceae | <i>Orthotrichum</i> | <i>Orthotrichum fastigiatum</i>   | FJ036884 |
| Mosses | Orthotrichaceae | <i>Orthotrichum</i> | <i>Orthotrichum fastigiatum</i>   | FJ036882 |
| Mosses | Orthotrichaceae | <i>Orthotrichum</i> | <i>Orthotrichum fastigiatum</i>   | FJ036880 |
| Mosses | Orthotrichaceae | <i>Nyholmiella</i>  | <i>Nyholmiella gymnostoma</i>     | GQ370355 |
| Mosses | Orthotrichaceae | <i>Nyholmiella</i>  | <i>Nyholmiella gymnostoma</i>     | GQ370353 |
| Mosses | Orthotrichaceae | <i>Nyholmiella</i>  | <i>Nyholmiella gymnostoma</i>     | GQ370354 |
| Mosses | Orthotrichaceae | <i>Nyholmiella</i>  | <i>Nyholmiella gymnostoma</i>     | GQ370352 |
| Mosses | Orthotrichaceae | <i>Orthotrichum</i> | <i>Orthotrichum rupestre</i>      | GQ428030 |
| Mosses | Orthotrichaceae | <i>Orthotrichum</i> | <i>Orthotrichum rupestre</i>      | GQ370346 |
| Mosses | Orthotrichaceae | <i>Orthotrichum</i> | <i>Orthotrichum striatum</i>      | FJ036887 |
| Mosses | Orthotrichaceae | <i>Orthotrichum</i> | <i>Orthotrichum striatum</i>      | FJ036885 |
| Mosses | Orthotrichaceae | <i>Orthotrichum</i> | <i>Orthotrichum striatum</i>      | FJ036886 |
| Mosses | Hypnaceae       | <i>Hypnum</i>       | <i>Hypnum andoi</i>               | EU163585 |
| Mosses | Hypnaceae       | <i>Hypnum</i>       | <i>Hypnum andoi</i>               | GQ849567 |
| Mosses | Orthotrichaceae | <i>Orthotrichum</i> | <i>Orthotrichum pylaisii</i>      | FJ036869 |
| Mosses | Orthotrichaceae | <i>Orthotrichum</i> | <i>Orthotrichum pylaisii</i>      | FJ036868 |
| Mosses | Polytrichaceae  | <i>Polytrichum</i>  | <i>Polytrichum sphaerothecium</i> | FJ572557 |
| Mosses | Polytrichaceae  | <i>Polytrichum</i>  | <i>Polytrichum sphaerothecium</i> | FJ572556 |
| Mosses | Grimmiaceae     | <i>Niphotrichum</i> | <i>Niphotrichum ericoides</i>     | GU808907 |
| Mosses | Grimmiaceae     | <i>Niphotrichum</i> | <i>Niphotrichum ericoides</i>     | GU808905 |
| Mosses | Grimmiaceae     | <i>Niphotrichum</i> | <i>Niphotrichum ericoides</i>     | GU808906 |
| Mosses | Grimmiaceae     | <i>Niphotrichum</i> | <i>Niphotrichum ericoides</i>     | FJ572565 |
| Mosses | Grimmiaceae     | <i>Niphotrichum</i> | <i>Niphotrichum ericoides</i>     | FJ572566 |

|        |             |                      |                                                   |          |
|--------|-------------|----------------------|---------------------------------------------------|----------|
| Mosses | Grimmiaceae | <i>Niphotrichum</i>  | <i>Niphotrichum ericoides</i>                     | FJ572564 |
| Mosses | Grimmiaceae | <i>Grimmia</i>       | <i>Grimmia obtusifolia</i>                        | GU808941 |
| Mosses | Grimmiaceae | <i>Grimmia</i>       | <i>Grimmia obtusifolia</i>                        | GU808939 |
| Mosses | Grimmiaceae | <i>Grimmia</i>       | <i>Grimmia obtusifolia</i>                        | GU808940 |
| Mosses | Grimmiaceae | <i>Codriophorus</i>  | <i>Codriophorus anomodontoides</i>                | GU808895 |
| Mosses | Grimmiaceae | <i>Codriophorus</i>  | <i>Codriophorus anomodontoides</i>                | GU808893 |
| Mosses | Grimmiaceae | <i>Codriophorus</i>  | <i>Codriophorus anomodontoides</i>                | GU808891 |
| Mosses | Grimmiaceae | <i>Codriophorus</i>  | <i>Codriophorus anomodontoides</i>                | GU808896 |
| Mosses | Grimmiaceae | <i>Codriophorus</i>  | <i>Codriophorus anomodontoides</i>                | GU808894 |
| Mosses | Grimmiaceae | <i>Codriophorus</i>  | <i>Codriophorus anomodontoides</i>                | GU808892 |
| Mosses | Grimmiaceae | <i>Niphotrichum</i>  | <i>Niphotrichum barbuloides</i>                   | GU808903 |
| Mosses | Grimmiaceae | <i>Niphotrichum</i>  | <i>Niphotrichum barbuloides</i>                   | GU808904 |
| Mosses | Grimmiaceae | <i>Bucklandiella</i> | <i>Bucklandiella himalayana</i>                   | GU808883 |
| Mosses | Grimmiaceae | <i>Bucklandiella</i> | <i>Bucklandiella himalayana</i>                   | GU808881 |
| Mosses | Grimmiaceae | <i>Bucklandiella</i> | <i>Bucklandiella himalayana</i>                   | GU808882 |
| Mosses | Grimmiaceae | <i>Bucklandiella</i> | <i>Bucklandiella subsecunda</i>                   | GU808885 |
| Mosses | Grimmiaceae | <i>Bucklandiella</i> | <i>Bucklandiella subsecunda</i>                   | GU808886 |
| Mosses | Grimmiaceae | <i>Bucklandiella</i> | <i>Bucklandiella subsecunda</i>                   | GU808884 |
| Mosses | Hypnaceae   | <i>Hypnum</i>        | <i>Hypnum cupressiforme</i> var. <i>lacunosum</i> | GQ849571 |
| Mosses | Hypnaceae   | <i>Hypnum</i>        | <i>Hypnum cupressiforme</i> var. <i>lacunosum</i> | GQ849572 |
