# Supplementary material for: Utility of the trnH–psbA Intergenic Spacer Region and Its Combinations as Plant DNA Barcodes: A Meta-Analysis
Source: PubMed Central journal article supplement (PMC3498263; doi:10.1371/journal.pone.0048833), 2012-11-14
Supplement: pone.0048833.s004.pdf [file pone.0048833.s004.pdf]

**Table S4.** List of *trnH-psbA*, ITS2, *rbcL*, and *matK* samples with the same voucher numbers. The names of the corresponding group, family, genus, and species, the voucher number, as well as the GenBank accession number for each sample are shown.

| Taxonomy       | Family         | Genus              | Species                         | Voucher no.   | GenBank accesstion no. |              |             |             |
|----------------|----------------|--------------------|---------------------------------|---------------|------------------------|--------------|-------------|-------------|
|                |                |                    |                                 |               | ITS2                   | <i>trnH-</i> | <i>rbcL</i> | <i>matK</i> |
| Eudicotyledons | Zygophyllaceae | <i>Zygophyllum</i> | <i>Zygophyllum rosowii</i>      | H62           | JF979032               | JN047542     | JF944811    | JF956823    |
| Eudicotyledons | Zygophyllaceae | <i>Zygophyllum</i> | <i>Zygophyllum rosowii</i>      | D1507         | JF979033               | JN047543     | JF944812    | JF956824    |
| Eudicotyledons | Zygophyllaceae | <i>Zygophyllum</i> | <i>Zygophyllum obliquum</i>     | H68           | JF979030               | JN047538     | JF944807    | JF956821    |
| Eudicotyledons | Zygophyllaceae | <i>Zygophyllum</i> | <i>Zygophyllum obliquum</i>     | H67           | JF979031               | JN047539     | JF944808    | JF956822    |
| Eudicotyledons | Zygophyllaceae | <i>Zygophyllum</i> | <i>Zygophyllum macropodum</i>   | D1553         | JF979028               | JN047536     | JF944805    | JF956819    |
| Eudicotyledons | Zygophyllaceae | <i>Zygophyllum</i> | <i>Zygophyllum macropodum</i>   | D1508         | JF979029               | JN047537     | JF944806    | JF956820    |
| Eudicotyledons | Zygophyllaceae | <i>Zygophyllum</i> | <i>Zygophyllum fabago</i>       | H74           | JF979025               | JN047533     | JF944801    | JF956815    |
| Eudicotyledons | Zygophyllaceae | <i>Zygophyllum</i> | <i>Zygophyllum fabago</i>       | D485          | JF979027               | JN047534     | JF944803    | JF956817    |
| Eudicotyledons | Zygophyllaceae | <i>Zygophyllum</i> | <i>Zygophyllum brachypterum</i> | H65           | JF979024               | JN047532     | JF944800    | JF956814    |
| Eudicotyledons | Zygophyllaceae | <i>Zygophyllum</i> | <i>Zygophyllum brachypterum</i> | H66           | JF979023               | JN047531     | JF944799    | JF956813    |
| Eudicotyledons | Adoxaceae      | <i>Viburnum</i>    | <i>Viburnum utile</i>           | Egolf_2336-E  | AY265156               | AY62742      | HQ59177     | HQ59163     |
| Eudicotyledons | Adoxaceae      | <i>Viburnum</i>    | <i>Viburnum utile</i>           | Z348          | JF979017               | JN047526     | JF944793    | JF956807    |
| Eudicotyledons | Adoxaceae      | <i>Viburnum</i>    | <i>Viburnum utile</i>           | Z347          | JF979018               | JN047527     | JF944794    | JF956808    |
| Eudicotyledons | Adoxaceae      | <i>Viburnum</i>    | <i>Viburnum foetidum</i>        | Z333          | JF979008               | JN047509     | JF944776    | JF956790    |
| Eudicotyledons | Adoxaceae      | <i>Viburnum</i>    | <i>Viburnum foetidum</i>        | Z330          | JF979009               | JN047512     | JF944779    | JF956793    |
| Eudicotyledons | Adoxaceae      | <i>Viburnum</i>    | <i>Viburnum foetidum</i>        | C.-H. Lin 563 | HQ591963               | HQ592075     | HQ59172     | HQ59158     |
| Eudicotyledons | Adoxaceae      | <i>Viburnum</i>    | <i>Viburnum foetidum</i>        | D1233         | JF979010               | JN047513     | JF944780    | JF956794    |
| Eudicotyledons | Adoxaceae      | <i>Viburnum</i>    | <i>Viburnum erosum</i>          | Z328          | JF979006               | JN047503     | JF944770    | JF956784    |
| Eudicotyledons | Adoxaceae      | <i>Viburnum</i>    | <i>Viburnum erosum</i>          | Z326          | JF979007               | JN047505     | JF944772    | JF956786    |
| Eudicotyledons | Adoxaceae      | <i>Viburnum</i>    | <i>Viburnum dilatatum</i>       | Z323          | JF979003               | JN047497     | JF944764    | JF956778    |
| Eudicotyledons | Adoxaceae      | <i>Viburnum</i>    | <i>Viburnum dilatatum</i>       | Z322          | JF979004               | JN047498     | JF944765    | JF956779    |
| Eudicotyledons | Adoxaceae      | <i>Viburnum</i>    | <i>Viburnum dilatatum</i>       | Z319          | JF979005               | JN047501     | JF944768    | JF956782    |
| Eudicotyledons | Adoxaceae      | <i>Viburnum</i>    | <i>Viburnum cylindricum</i>     | Z318          | JF978999               | JN047490     | JF944757    | JF956772    |
| Eudicotyledons | Adoxaceae      | <i>Viburnum</i>    | <i>Viburnum cylindricum</i>     | Z314          | JF979002               | JN047494     | JF944761    | JF956776    |
| Eudicotyledons | Adoxaceae      | <i>Viburnum</i>    | <i>Viburnum cylindricum</i>     | Z316          | JF979001               | JN047492     | JF944759    | JF956774    |
| Eudicotyledons | Adoxaceae      | <i>Viburnum</i>    | <i>Viburnum cylindricum</i>     | Z317          | JF979000               | JN047491     | JF944758    | JF956773    |
| Eudicotyledons | Adoxaceae      | <i>Viburnum</i>    | <i>Viburnum betulifolium</i>    | D940          | JF978997               | JN047487     | JF944754    | JF956769    |
| Eudicotyledons | Adoxaceae      | <i>Viburnum</i>    | <i>Viburnum betulifolium</i>    | D1266         | JF978998               | JN047489     | JF944756    | JF956771    |
| Eudicotyledons | Adoxaceae      | <i>Viburnum</i>    | <i>Viburnum betulifolium</i>    | Z312          | JF978996               | JN047485     | JF944752    | JF956767    |
| Eudicotyledons | Adoxaceae      | <i>Viburnum</i>    | <i>Viburnum betulifolium</i>    | Z313          | JF978995               | JN047484     | JF944751    | JF956766    |
| Eudicotyledons | Adoxaceae      | <i>Viburnum</i>    | <i>Viburnum awabuki</i>         | Liu 141       | HQ591951               | HQ592060     | HQ59170     | HQ59156     |
| Eudicotyledons | Adoxaceae      | <i>Viburnum</i>    | <i>Viburnum awabuki</i>         | Z345          | JF979014               | JN047523     | JF944790    | JF956804    |
| Eudicotyledons | Adoxaceae      | <i>Viburnum</i>    | <i>Viburnum awabuki</i>         | Z344          | JF979015               | JN047524     | JF944791    | JF956805    |
| Eudicotyledons | Adoxaceae      | <i>Viburnum</i>    | <i>Viburnum awabuki</i>         | Z343          | JF979016               | JN047525     | JF944792    | JF956806    |
| Eudicotyledons | Cucurbitaceae  | <i>Thladiantha</i> | <i>Thladiantha villosula</i>    | LiHT10179     | JF978974               | JN047449     | JF944711    | JF956741    |
| Eudicotyledons | Cucurbitaceae  | <i>Thladiantha</i> | <i>Thladiantha villosula</i>    | LiHT10173     | JF978975               | JN047450     | JF944712    | JF956742    |

|                |               |                    |                                 |            |          |          |          |          |
|----------------|---------------|--------------------|---------------------------------|------------|----------|----------|----------|----------|
| Eudicotyledons | Cucurbitaceae | <i>Thladiantha</i> | <i>Thladiantha villosula</i>    | LiHT214    | JF978970 | JN047445 | JF944707 | JF956737 |
| Eudicotyledons | Cucurbitaceae | <i>Thladiantha</i> | <i>Thladiantha villosula</i>    | LiHT203    | JF978971 | JN047446 | JF944708 | JF956738 |
| Eudicotyledons | Cucurbitaceae | <i>Thladiantha</i> | <i>Thladiantha villosula</i>    | LiHT10180  | JF978973 | JN047448 | JF944710 | JF956740 |
| Eudicotyledons | Cucurbitaceae | <i>Thladiantha</i> | <i>Thladiantha villosula</i>    | LiHT10181  | JF978972 | JN047447 | JF944709 | JF956739 |
| Eudicotyledons | Cucurbitaceae | <i>Thladiantha</i> | <i>Thladiantha oliveri</i>      | LiHT151    | JF978966 | JN047441 | JF944703 | JF956733 |
| Eudicotyledons | Cucurbitaceae | <i>Thladiantha</i> | <i>Thladiantha oliveri</i>      | LiHT174    | JF978965 | JN047440 | JF944702 | JF956732 |
| Eudicotyledons | Cucurbitaceae | <i>Thladiantha</i> | <i>Thladiantha oliveri</i>      | LiHT14     | JF978967 | JN047442 | JF944704 | JF956734 |
| Eudicotyledons | Cucurbitaceae | <i>Thladiantha</i> | <i>Thladiantha oliveri</i>      | LiHT080200 | JF978969 | JN047444 | JF944706 | JF956736 |
| Eudicotyledons | Cucurbitaceae | <i>Thladiantha</i> | <i>Thladiantha oliveri</i>      | LiHT225    | JF978964 | JN047439 | JF944701 | JF956731 |
| Eudicotyledons | Cucurbitaceae | <i>Thladiantha</i> | <i>Thladiantha oliveri</i>      | LiHT1031   | JF978968 | JN047443 | JF944705 | JF956735 |
| Eudicotyledons | Cucurbitaceae | <i>Thladiantha</i> | <i>Thladiantha nudiflora</i>    | LiHT1036   | JF978958 | JN047433 | JF944695 | JF956725 |
| Eudicotyledons | Cucurbitaceae | <i>Thladiantha</i> | <i>Thladiantha nudiflora</i>    | LiHT1013   | JF978962 | JN047437 | JF944699 | JF956729 |
| Eudicotyledons | Cucurbitaceae | <i>Thladiantha</i> | <i>Thladiantha nudiflora</i>    | LiHT1062   | JF978955 | JN047430 | JF944692 | JF956722 |
| Eudicotyledons | Cucurbitaceae | <i>Thladiantha</i> | <i>Thladiantha nudiflora</i>    | LiHT1047   | JF978956 | JN047431 | JF944693 | JF956723 |
| Eudicotyledons | Cucurbitaceae | <i>Thladiantha</i> | <i>Thladiantha nudiflora</i>    | LiHT080199 | JF978963 | JN047438 | JF944700 | JF956730 |
| Eudicotyledons | Cucurbitaceae | <i>Thladiantha</i> | <i>Thladiantha nudiflora</i>    | LiHT1020   | JF978961 | JN047436 | JF944698 | JF956728 |
| Eudicotyledons | Cucurbitaceae | <i>Thladiantha</i> | <i>Thladiantha nudiflora</i>    | LiHT1021   | JF978960 | JN047435 | JF944697 | JF956727 |
| Eudicotyledons | Cucurbitaceae | <i>Thladiantha</i> | <i>Thladiantha nudiflora</i>    | LiHT1024   | JF978959 | JN047434 | JF944696 | JF956726 |
| Eudicotyledons | Cucurbitaceae | <i>Thladiantha</i> | <i>Thladiantha nudiflora</i>    | LiHT1037   | JF978957 | JN047432 | JF944694 | JF956724 |
| Eudicotyledons | Cucurbitaceae | <i>Thladiantha</i> | <i>Thladiantha nudiflora</i>    | LiHT297    | JF978954 | JN047429 | JF944691 | JF956721 |
| Eudicotyledons | Cucurbitaceae | <i>Thladiantha</i> | <i>Thladiantha montana</i>      | LiHT10182  | JF978952 | JN047427 | JF944689 | JF956719 |
| Eudicotyledons | Cucurbitaceae | <i>Thladiantha</i> | <i>Thladiantha montana</i>      | LiHT10183  | JF978951 | JN047426 | JF944688 | JF956718 |
| Eudicotyledons | Cucurbitaceae | <i>Thladiantha</i> | <i>Thladiantha montana</i>      | LiHT10186  | JF978950 | JN047425 | JF944687 | JF956717 |
| Eudicotyledons | Cucurbitaceae | <i>Thladiantha</i> | <i>Thladiantha montana</i>      | LiHT10187  | JF978949 | JN047424 | JF944686 | JF956716 |
| Eudicotyledons | Cucurbitaceae | <i>Thladiantha</i> | <i>Thladiantha montana</i>      | LiHT092404 | JF978953 | JN047428 | JF944690 | JF956720 |
| Eudicotyledons | Cucurbitaceae | <i>Thladiantha</i> | <i>Thladiantha maculata</i>     | LiHT307    | JF978945 | JN047420 | JF944682 | JF956712 |
| Eudicotyledons | Cucurbitaceae | <i>Thladiantha</i> | <i>Thladiantha maculata</i>     | LiHT314    | JF978944 | JN047419 | JF944681 | JF956711 |
| Eudicotyledons | Cucurbitaceae | <i>Thladiantha</i> | <i>Thladiantha maculata</i>     | LiHT315    | JF978943 | JN047418 | JF944680 | JF956710 |
| Eudicotyledons | Cucurbitaceae | <i>Thladiantha</i> | <i>Thladiantha maculata</i>     | LiHT298    | JF978948 | JN047423 | JF944685 | JF956715 |
| Eudicotyledons | Cucurbitaceae | <i>Thladiantha</i> | <i>Thladiantha maculata</i>     | LiHT305    | JF978947 | JN047422 | JF944684 | JF956714 |
| Eudicotyledons | Cucurbitaceae | <i>Thladiantha</i> | <i>Thladiantha maculata</i>     | LiHT306    | JF978946 | JN047421 | JF944683 | JF956713 |
| Eudicotyledons | Cucurbitaceae | <i>Thladiantha</i> | <i>Thladiantha longisepala</i>  | LiHT218    | JF978941 | JN047416 | JF944678 | JF956708 |
| Eudicotyledons | Cucurbitaceae | <i>Thladiantha</i> | <i>Thladiantha longisepala</i>  | LiHT1038   | JF978942 | JN047417 | JF944679 | JF956709 |
| Eudicotyledons | Cucurbitaceae | <i>Thladiantha</i> | <i>Thladiantha longisepala</i>  | LiHT224    | JF978940 | JN047415 | JF944677 | JF956707 |
| Eudicotyledons | Cucurbitaceae | <i>Thladiantha</i> | <i>Thladiantha lijiangensis</i> | LiHT10178  | JF978938 | JN047413 | JF944675 | JF956705 |
| Eudicotyledons | Cucurbitaceae | <i>Thladiantha</i> | <i>Thladiantha lijiangensis</i> | LiHT10176  | JF978939 | JN047414 | JF944676 | JF956706 |
| Eudicotyledons | Cucurbitaceae | <i>Thladiantha</i> | <i>Thladiantha lijiangensis</i> | LiHT10174  | JF978937 | JN047412 | JF944674 | JF956704 |
| Eudicotyledons | Cucurbitaceae | <i>Thladiantha</i> | <i>Thladiantha lijiangensis</i> | LiHT212    | JF978933 | JN047408 | JF944670 | JF956700 |
| Eudicotyledons | Cucurbitaceae | <i>Thladiantha</i> | <i>Thladiantha lijiangensis</i> | LiHT209    | JF978934 | JN047409 | JF944671 | JF956701 |
| Eudicotyledons | Cucurbitaceae | <i>Thladiantha</i> | <i>Thladiantha lijiangensis</i> | LiHT194    | JF978935 | JN047410 | JF944672 | JF956702 |

|                |               |                    |                                 |             |          |          |          |          |
|----------------|---------------|--------------------|---------------------------------|-------------|----------|----------|----------|----------|
| Eudicotyledons | Cucurbitaceae | <i>Thladiantha</i> | <i>Thladiantha lijiangensis</i> | LiHT10175   | JF978936 | JN047411 | JF944673 | JF956703 |
| Eudicotyledons | Cucurbitaceae | <i>Thladiantha</i> | <i>Thladiantha hookeri</i>      | LiHT10145   | JF978931 | JN047406 | JF944668 | JF956698 |
| Eudicotyledons | Cucurbitaceae | <i>Thladiantha</i> | <i>Thladiantha hookeri</i>      | LiHT10148   | JF978930 | JN047405 | JF944667 | JF956697 |
| Eudicotyledons | Cucurbitaceae | <i>Thladiantha</i> | <i>Thladiantha hookeri</i>      | LiHT10192   | JF978929 | JN047404 | JF944666 | JF956696 |
| Eudicotyledons | Cucurbitaceae | <i>Thladiantha</i> | <i>Thladiantha hookeri</i>      | LiHT092568  | JF978932 | JN047407 | JF944669 | JF956699 |
| Eudicotyledons | Cucurbitaceae | <i>Thladiantha</i> | <i>Thladiantha hookeri</i>      | LiHT10194   | JF978928 | JN047403 | JF944665 | JF956695 |
| Eudicotyledons | Cucurbitaceae | <i>Thladiantha</i> | <i>Thladiantha henryi</i>       | LiHT1053-3  | JF978925 | JN047400 | JF944662 | JF956692 |
| Eudicotyledons | Cucurbitaceae | <i>Thladiantha</i> | <i>Thladiantha henryi</i>       | LiHT1053-2  | JF978926 | JN047401 | JF944663 | JF956693 |
| Eudicotyledons | Cucurbitaceae | <i>Thladiantha</i> | <i>Thladiantha henryi</i>       | LiHT1053-1  | JF978927 | JN047402 | JF944664 | JF956694 |
| Eudicotyledons | Cucurbitaceae | <i>Thladiantha</i> | <i>Thladiantha grandisepala</i> | LiHT043     | JF978923 | JN047398 | JF944660 | JF956690 |
| Eudicotyledons | Cucurbitaceae | <i>Thladiantha</i> | <i>Thladiantha grandisepala</i> | LiHT10142-3 | JF978920 | JN047395 | JF944657 | JF956687 |
| Eudicotyledons | Cucurbitaceae | <i>Thladiantha</i> | <i>Thladiantha grandisepala</i> | LiHT10142-2 | JF978921 | JN047396 | JF944658 | JF956688 |
| Eudicotyledons | Cucurbitaceae | <i>Thladiantha</i> | <i>Thladiantha grandisepala</i> | LiHT10142-1 | JF978922 | JN047397 | JF944659 | JF956689 |
| Eudicotyledons | Cucurbitaceae | <i>Thladiantha</i> | <i>Thladiantha grandisepala</i> | LiHT10147   | JF978919 | JN047394 | JF944656 | JF956686 |
| Eudicotyledons | Cucurbitaceae | <i>Thladiantha</i> | <i>Thladiantha grandisepala</i> | LiHT10160   | JF978918 | JN047393 | JF944655 | JF956685 |
| Eudicotyledons | Cucurbitaceae | <i>Thladiantha</i> | <i>Thladiantha grandisepala</i> | LiHT10163   | JF978917 | JN047392 | JF944654 | JF956684 |
| Eudicotyledons | Cucurbitaceae | <i>Thladiantha</i> | <i>Thladiantha grandisepala</i> | LiHT03      | JF978924 | JN047399 | JF944661 | JF956691 |
| Eudicotyledons | Cucurbitaceae | <i>Thladiantha</i> | <i>Thladiantha dentata</i>      | LiHT10195   | JF978913 | JN047388 | JF944650 | JF956680 |
| Eudicotyledons | Cucurbitaceae | <i>Thladiantha</i> | <i>Thladiantha dentata</i>      | LiHT10191   | JF978915 | JN047390 | JF944652 | JF956682 |
| Eudicotyledons | Cucurbitaceae | <i>Thladiantha</i> | <i>Thladiantha dentata</i>      | LiHT10193   | JF978914 | JN047389 | JF944651 | JF956681 |
| Eudicotyledons | Cucurbitaceae | <i>Thladiantha</i> | <i>Thladiantha dentata</i>      | LiHT10188   | JF978916 | JN047391 | JF944653 | JF956683 |
| Eudicotyledons | Cucurbitaceae | <i>Thladiantha</i> | <i>Thladiantha davidii</i>      | LiHT1019    | JF978912 | JN047387 | JF944649 | JF956679 |
| Eudicotyledons | Cucurbitaceae | <i>Thladiantha</i> | <i>Thladiantha davidii</i>      | LiHT1022    | JF978911 | JN047386 | JF944648 | JF956678 |
| Eudicotyledons | Cucurbitaceae | <i>Thladiantha</i> | <i>Thladiantha davidii</i>      | LiHT1023    | JF978910 | JN047385 | JF944647 | JF956677 |
| Eudicotyledons | Cucurbitaceae | <i>Thladiantha</i> | <i>Thladiantha davidii</i>      | LiHT1026    | JF978909 | JN047384 | JF944646 | JF956676 |
| Eudicotyledons | Cucurbitaceae | <i>Thladiantha</i> | <i>Thladiantha cordifolia</i>   | LiHT10137   | JF978903 | JN047378 | JF944640 | JF956670 |
| Eudicotyledons | Cucurbitaceae | <i>Thladiantha</i> | <i>Thladiantha cordifolia</i>   | LiHT081041  | JF978908 | JN047383 | JF944645 | JF956675 |
| Eudicotyledons | Cucurbitaceae | <i>Thladiantha</i> | <i>Thladiantha cordifolia</i>   | LiHT1010    | JF978907 | JN047382 | JF944644 | JF956674 |
| Eudicotyledons | Cucurbitaceae | <i>Thladiantha</i> | <i>Thladiantha cordifolia</i>   | LiHT1016    | JF978902 | JN047377 | JF944639 | JF956669 |
| Eudicotyledons | Cucurbitaceae | <i>Thladiantha</i> | <i>Thladiantha cordifolia</i>   | LiHT1056    | JF978901 | JN047376 | JF944638 | JF956668 |
| Eudicotyledons | Cucurbitaceae | <i>Thladiantha</i> | <i>Thladiantha cordifolia</i>   | LiHT1087    | JF978899 | JN047374 | JF944636 | JF956666 |
| Eudicotyledons | Cucurbitaceae | <i>Thladiantha</i> | <i>Thladiantha cordifolia</i>   | LiHT1083    | JF978900 | JN047375 | JF944637 | JF956667 |
| Eudicotyledons | Cucurbitaceae | <i>Thladiantha</i> | <i>Thladiantha cordifolia</i>   | LiHT1095    | JF978897 | JN047372 | JF944634 | JF956664 |
| Eudicotyledons | Cucurbitaceae | <i>Thladiantha</i> | <i>Thladiantha cordifolia</i>   | LiHT1094    | JF978898 | JN047373 | JF944635 | JF956665 |
| Eudicotyledons | Cucurbitaceae | <i>Thladiantha</i> | <i>Thladiantha cordifolia</i>   | LiHT10119   | JF978905 | JN047380 | JF944642 | JF956672 |
| Eudicotyledons | Cucurbitaceae | <i>Thladiantha</i> | <i>Thladiantha cordifolia</i>   | LiHT10104   | JF978906 | JN047381 | JF944643 | JF956673 |
| Eudicotyledons | Cucurbitaceae | <i>Thladiantha</i> | <i>Thladiantha cordifolia</i>   | LiHT10125   | JF978904 | JN047379 | JF944641 | JF956671 |
| Eudicotyledons | Cucurbitaceae | <i>Thladiantha</i> | <i>Thladiantha capitata</i>     | LiHT1050    | JF978896 | JN047371 | JF944633 | JF956663 |
| Eudicotyledons | Cucurbitaceae | <i>Thladiantha</i> | <i>Thladiantha capitata</i>     | LiHT204     | JF978892 | JN047367 | JF944629 | JF956659 |
| Eudicotyledons | Cucurbitaceae | <i>Thladiantha</i> | <i>Thladiantha capitata</i>     | LiHT1051-3  | JF978893 | JN047368 | JF944630 | JF956660 |

|                |               |                     |                                    |                  |          |          |          |          |
|----------------|---------------|---------------------|------------------------------------|------------------|----------|----------|----------|----------|
| Eudicotyledons | Cucurbitaceae | <i>Thladiantha</i>  | <i>Thladiantha capitata</i>        | LiHT1051-1       | JF978895 | JN047370 | JF944632 | JF956662 |
| Eudicotyledons | Cucurbitaceae | <i>Thladiantha</i>  | <i>Thladiantha capitata</i>        | LiHT1051-2       | JF978894 | JN047369 | JF944631 | JF956661 |
| Eudicotyledons | Asteraceae    | <i>Syncalathium</i> | <i>Syncalathium kawaguchii</i>     | BouffordDE-40822 | JF978845 | JN047311 | JF944566 | JF956598 |
| Eudicotyledons | Asteraceae    | <i>Syncalathium</i> | <i>Syncalathium kawaguchii</i>     | ZhangJW-093      | JF978843 | JN047309 | JF944564 | JF956596 |
| Eudicotyledons | Asteraceae    | <i>Syncalathium</i> | <i>Syncalathium kawaguchii</i>     | NieZL-903        | JF978844 | JN047310 | JF944565 | JF956597 |
| Eudicotyledons | Asteraceae    | <i>Syncalathium</i> | <i>Syncalathium disciforme</i>     | ZhangJW-1010     | JF978840 | JN047306 | JF944558 | JF956590 |
| Eudicotyledons | Asteraceae    | <i>Syncalathium</i> | <i>Syncalathium disciforme</i>     | BouffordDE-39737 | JF978842 | JN047308 | JF944560 | JF956592 |
| Eudicotyledons | Asteraceae    | <i>Syncalathium</i> | <i>Syncalathium disciforme</i>     | BouffordDE-40137 | JF978841 | JN047307 | JF944559 | JF956591 |
| Eudicotyledons | Asteraceae    | <i>Syncalathium</i> | <i>Syncalathium chrysocephalum</i> | BouffordDE-41025 | JF978838 | JN047304 | JF944555 | JF956587 |
| Eudicotyledons | Asteraceae    | <i>Syncalathium</i> | <i>Syncalathium chrysocephalum</i> | BouffordDE-41418 | JF978837 | JN047303 | JF944554 | JF956586 |
| Eudicotyledons | Amaranthaceae | <i>Suaeda</i>       | <i>Suaeda glauca</i>               | Z460             | JF978817 | JN047267 | JF944515 | JF956553 |
| Eudicotyledons | Amaranthaceae | <i>Suaeda</i>       | <i>Suaeda glauca</i>               | Z459             | JF978818 | JN047268 | JF944516 | JF956554 |
| Eudicotyledons | Amaranthaceae | <i>Suaeda</i>       | <i>Suaeda glauca</i>               | Z461             | JF978816 | JN047266 | JF944514 | JF956552 |
| Eudicotyledons | Amaranthaceae | <i>Suaeda</i>       | <i>Suaeda corniculata</i>          | D1321            | JF978815 | JN047265 | JF944513 | JF956551 |
| Eudicotyledons | Amaranthaceae | <i>Suaeda</i>       | <i>Suaeda corniculata</i>          | D1338            | JF978814 | JN047264 | JF944512 | JF956550 |
| Eudicotyledons | Stachyuraceae | <i>Stachyurus</i>   | <i>Stachyurus himalaicus</i>       | H14              | JF978810 | JN047255 | JF944504 | JF956541 |
| Eudicotyledons | Stachyuraceae | <i>Stachyurus</i>   | <i>Stachyurus himalaicus</i>       | H12              | JF978811 | JN047257 | JF944506 | JF956543 |
| Eudicotyledons | Stachyuraceae | <i>Stachyurus</i>   | <i>Stachyurus chinensis</i>        | C650             | JF978809 | JN047254 | JF944503 | JF956540 |
| Eudicotyledons | Stachyuraceae | <i>Stachyurus</i>   | <i>Stachyurus chinensis</i>        | H8               | JF978807 | JN047251 | JF944500 | JF956537 |
| Eudicotyledons | Stachyuraceae | <i>Stachyurus</i>   | <i>Stachyurus chinensis</i>        | H7               | JF978808 | JN047252 | JF944501 | JF956538 |
| Eudicotyledons | Asteraceae    | <i>Soroiseris</i>   | <i>Soroiseris hirsuta</i>          | BouffordDE-41585 | JF978806 | JN047250 | JF944491 | JF956530 |
| Eudicotyledons | Asteraceae    | <i>Soroiseris</i>   | <i>Soroiseris hirsuta</i>          | SCSB-W1036       | JF978805 | JN047249 | JF944490 | JF956529 |
| Eudicotyledons | Asteraceae    | <i>Soroiseris</i>   | <i>Soroiseris glomerata</i>        | ZhangJW-033      | JF978802 | JN047247 | JF944484 | JF956523 |
| Eudicotyledons | Asteraceae    | <i>Soroiseris</i>   | <i>Soroiseris glomerata</i>        | SunH-ZX0904      | JF978804 | JN047248 | JF944486 | JF956525 |
| Eudicotyledons | Asteraceae    | <i>Soroiseris</i>   | <i>Soroiseris erysimoides</i>      | ZhangJW-1009     | JF978799 | JN047243 | JF944477 | JF956515 |
| Eudicotyledons | Asteraceae    | <i>Soroiseris</i>   | <i>Soroiseris erysimoides</i>      | BouffordDE-41027 | JF978800 | JN047244 | JF944478 | JF956516 |
| Eudicotyledons | Solanaceae    | <i>Solanum</i>      | <i>Solanum spirale</i>             | H40              | JF978798 | JN047229 | JF944463 | JF956501 |
| Eudicotyledons | Solanaceae    | <i>Solanum</i>      | <i>Solanum spirale</i>             | H41              | JF978797 | JN047228 | JF944462 | JF956500 |
| Eudicotyledons | Solanaceae    | <i>Solanum</i>      | <i>Solanum nigrum</i>              | H37              | JF978794 | JN047222 | JF944456 | JF956494 |
| Eudicotyledons | Solanaceae    | <i>Solanum</i>      | <i>Solanum nigrum</i>              | H35              | JF978795 | JN047224 | JF944458 | JF956496 |
| Eudicotyledons | Solanaceae    | <i>Solanum</i>      | <i>Solanum nigrum</i>              | H38              | JF978793 | JN047221 | JF944455 | JF956493 |
| Eudicotyledons | Solanaceae    | <i>Solanum</i>      | <i>Solanum nigrum</i>              | H39              | JF978792 | JN047220 | JF944454 | JF956492 |
| Eudicotyledons | Solanaceae    | <i>Solanum</i>      | <i>Solanum aculeatissimum</i>      | H47              | JF978787 | JN047208 | JF944441 | JF956479 |
| Eudicotyledons | Solanaceae    | <i>Solanum</i>      | <i>Solanum aculeatissimum</i>      | H46              | JF978788 | JN047209 | JF944442 | JF956480 |
| Eudicotyledons | Solanaceae    | <i>Solanum</i>      | <i>Solanum aculeatissimum</i>      | H49              | JF978790 | JN047211 | JF944444 | JF956482 |
| Eudicotyledons | Solanaceae    | <i>Solanum</i>      | <i>Solanum aculeatissimum</i>      | H48              | JF978791 | JN047212 | JF944445 | JF956483 |
| Eudicotyledons | Solanaceae    | <i>Solanum</i>      | <i>Solanum aculeatissimum</i>      | H50              | JF978789 | JN047210 | JF944443 | JF956481 |
| Eudicotyledons | Asteraceae    | <i>Sinosenecio</i>  | <i>Sinosenecio yilingii</i>        | Yangqe0128       | JF978636 | JN047201 | JF944297 | JF956330 |

|                |            |                    |                                              |            |          |          |          |          |
|----------------|------------|--------------------|----------------------------------------------|------------|----------|----------|----------|----------|
| Eudicotyledons | Asteraceae | <i>Sinosenecio</i> | <i>Sinosenecio yilingii</i>                  | Yangqe0126 | JF978638 | JN047203 | JF944299 | JF956332 |
| Eudicotyledons | Asteraceae | <i>Sinosenecio</i> | <i>Sinosenecio yilingii</i>                  | Yangqe0127 | JF978637 | JN047202 | JF944298 | JF956331 |
| Eudicotyledons | Asteraceae | <i>Sinosenecio</i> | <i>Sinosenecio villifer</i>                  | Yangqe0137 | JF978635 | JN047200 | JF944296 | JF956329 |
| Eudicotyledons | Asteraceae | <i>Sinosenecio</i> | <i>Sinosenecio villifer</i>                  | Yangqe0138 | JF978634 | JN047199 | JF944295 | JF956328 |
| Eudicotyledons | Asteraceae | <i>Sinosenecio</i> | <i>Sinosenecio sungpanensis</i>              | Yangqe0076 | JF978632 | JN047196 | JF944292 | JF956325 |
| Eudicotyledons | Asteraceae | <i>Sinosenecio</i> | <i>Sinosenecio sungpanensis</i>              | Yangqe0075 | JF978633 | JN047197 | JF944293 | JF956326 |
| Eudicotyledons | Asteraceae | <i>Sinosenecio</i> | <i>Sinosenecio subcoriaceus</i>              | Yangqe0112 | JF978631 | JN047193 | JF944289 | JF956321 |
| Eudicotyledons | Asteraceae | <i>Sinosenecio</i> | <i>Sinosenecio subcoriaceus</i>              | Yangqe0115 | JF978628 | JN047191 | JF944286 | JF956318 |
| Eudicotyledons | Asteraceae | <i>Sinosenecio</i> | <i>Sinosenecio subcoriaceus</i>              | Yangqe0114 | JF978629 | JN047192 | JF944287 | JF956319 |
| Eudicotyledons | Asteraceae | <i>Sinosenecio</i> | <i>Sinosenecio subcoriaceus</i>              | Yangqe0116 | JF978627 | JN047190 | JF944285 | JF956317 |
| Eudicotyledons | Asteraceae | <i>Sinosenecio</i> | <i>Sinosenecio sp. DZL-2011</i>              | Yangqe0152 | JF978569 | JN047126 | JF944218 | JF956252 |
| Eudicotyledons | Asteraceae | <i>Sinosenecio</i> | <i>Sinosenecio sp. DZL-2011</i>              | Yangqe0151 | JF978570 | JN047127 | JF944219 | JF956253 |
| Eudicotyledons | Asteraceae | <i>Sinosenecio</i> | <i>Sinosenecio sp. DZL-2011</i>              | Yangqe0150 | JF978571 | JN047128 | JF944220 | JF956254 |
| Eudicotyledons | Asteraceae | <i>Sinosenecio</i> | <i>Sinosenecio sichuanicus</i>               | Yangqe0157 | JF978625 | JN047188 | JF944283 | JF956315 |
| Eudicotyledons | Asteraceae | <i>Sinosenecio</i> | <i>Sinosenecio sichuanicus</i>               | Yangqe0156 | JF978626 | JN047189 | JF944284 | JF956316 |
| Eudicotyledons | Asteraceae | <i>Sinosenecio</i> | <i>Sinosenecio septilobus</i>                | Yangqe0070 | JF978623 | JN047186 | JF944281 | JF956313 |
| Eudicotyledons | Asteraceae | <i>Sinosenecio</i> | <i>Sinosenecio septilobus</i>                | Yangqe0071 | JF978622 | JN047185 | JF944280 | JF956312 |
| Eudicotyledons | Asteraceae | <i>Sinosenecio</i> | <i>Sinosenecio septilobus</i>                | Yangqe0069 | JF978624 | JN047187 | JF944282 | JF956314 |
| Eudicotyledons | Asteraceae | <i>Sinosenecio</i> | <i>Sinosenecio palmatisectus</i>             | Yangqe0087 | JF978619 | JN047180 | JF944277 | JF956309 |
| Eudicotyledons | Asteraceae | <i>Sinosenecio</i> | <i>Sinosenecio palmatisectus</i>             | Yangqe0086 | JF978620 | JN047181 | JF944278 | JF956310 |
| Eudicotyledons | Asteraceae | <i>Sinosenecio</i> | <i>Sinosenecio oldhamianus</i>               | Yangqe0083 | JF978616 | JN047177 | JF944274 | JF956306 |
| Eudicotyledons | Asteraceae | <i>Sinosenecio</i> | <i>Sinosenecio oldhamianus</i>               | Yangqe0082 | JF978617 | JN047178 | JF944275 | JF956307 |
| Eudicotyledons | Asteraceae | <i>Sinosenecio</i> | <i>Sinosenecio oldhamianus</i>               | Yangqe0081 | JF978618 | JN047179 | JF944276 | JF956308 |
| Eudicotyledons | Asteraceae | <i>Sinosenecio</i> | <i>Sinosenecio ligularioides</i>             | Yangqe0124 | JF978614 | JN047175 | JF944272 | JF956304 |
| Eudicotyledons | Asteraceae | <i>Sinosenecio</i> | <i>Sinosenecio ligularioides</i>             | Yangqe0125 | JF978613 | JN047174 | JF944271 | JF956303 |
| Eudicotyledons | Asteraceae | <i>Sinosenecio</i> | <i>Sinosenecio ligularioides</i>             | Yangqe0123 | JF978615 | JN047176 | JF944273 | JF956305 |
| Eudicotyledons | Asteraceae | <i>Sinosenecio</i> | <i>Sinosenecio latouchei</i>                 | Yangqe0080 | JF978609 | JN047170 | JF944267 | JF956299 |
| Eudicotyledons | Asteraceae | <i>Sinosenecio</i> | <i>Sinosenecio latouchei</i>                 | Yangqe0077 | JF978612 | JN047173 | JF944270 | JF956302 |
| Eudicotyledons | Asteraceae | <i>Sinosenecio</i> | <i>Sinosenecio latouchei</i>                 | Yangqe0078 | JF978611 | JN047172 | JF944269 | JF956301 |
| Eudicotyledons | Asteraceae | <i>Sinosenecio</i> | <i>Sinosenecio latouchei</i>                 | Yangqe0079 | JF978610 | JN047171 | JF944268 | JF956300 |
| Eudicotyledons | Asteraceae | <i>Sinosenecio</i> | <i>Sinosenecio koreanus</i>                  | Yangqe0153 | JF978608 | JN047169 | JF944266 | JF956298 |
| Eudicotyledons | Asteraceae | <i>Sinosenecio</i> | <i>Sinosenecio koreanus</i>                  | Yangqe0155 | JF978607 | JN047167 | JF944265 | JF956296 |
| Eudicotyledons | Asteraceae | <i>Sinosenecio</i> | <i>Sinosenecio jiuhuashanicus</i>            | Yangqe0074 | JF978604 | JN047164 | JF944262 | JF956293 |
| Eudicotyledons | Asteraceae | <i>Sinosenecio</i> | <i>Sinosenecio jiuhuashanicus</i>            | Yangqe0072 | JF978606 | JN047166 | JF944264 | JF956295 |
| Eudicotyledons | Asteraceae | <i>Sinosenecio</i> | <i>Sinosenecio jiuhuashanicus</i>            | Yangqe0073 | JF978605 | JN047165 | JF944263 | JF956294 |
| Eudicotyledons | Asteraceae | <i>Sinosenecio</i> | <i>Sinosenecio</i><br><i>homogyniphyllus</i> | Yangqe0132 | JF978601 | JN047161 | JF944259 | JF956290 |
| Eudicotyledons | Asteraceae | <i>Sinosenecio</i> | <i>Sinosenecio</i><br><i>homogyniphyllus</i> | Yangqe0130 | JF978602 | JN047162 | JF944260 | JF956291 |

|                |                |                    |                                    |            |          |          |          |          |
|----------------|----------------|--------------------|------------------------------------|------------|----------|----------|----------|----------|
| Eudicotyledons | Asteraceae     | <i>Sinosenecio</i> | <i>Sinosenecio homogyniphyllus</i> | Yangqe0129 | JF978603 | JN047163 | JF944261 | JF956292 |
| Eudicotyledons | Asteraceae     | <i>Sinosenecio</i> | <i>Sinosenecio homogyniphyllus</i> | Yangqe0136 | JF978600 | JN047159 | JF944256 | JF956287 |
| Eudicotyledons | Asteraceae     | <i>Sinosenecio</i> | <i>Sinosenecio guangxiensis</i>    | Yangqe0102 | JF978599 | JN047158 | JF944255 | JF956286 |
| Eudicotyledons | Asteraceae     | <i>Sinosenecio</i> | <i>Sinosenecio guangxiensis</i>    | Yangqe0104 | JF978597 | JN047156 | JF944253 | JF956285 |
| Eudicotyledons | Asteraceae     | <i>Sinosenecio</i> | <i>Sinosenecio globiger</i>        | Yangqe0096 | JF978592 | JN047151 | JF944247 | JF956279 |
| Eudicotyledons | Asteraceae     | <i>Sinosenecio</i> | <i>Sinosenecio globiger</i>        | Yangqe0098 | JF978591 | JN047150 | JF944245 | JF956277 |
| Eudicotyledons | Asteraceae     | <i>Sinosenecio</i> | <i>Sinosenecio globiger</i>        | Yangqe0094 | JF978594 | JN047152 | JF944249 | JF956281 |
| Eudicotyledons | Asteraceae     | <i>Sinosenecio</i> | <i>Sinosenecio globiger</i>        | Yangqe0100 | JF978590 | JN047149 | JF944243 | JF956276 |
| Eudicotyledons | Asteraceae     | <i>Sinosenecio</i> | <i>Sinosenecio euosmus</i>         | Yangqe0146 | JF978587 | JN047145 | JF944239 | JF956272 |
| Eudicotyledons | Asteraceae     | <i>Sinosenecio</i> | <i>Sinosenecio euosmus</i>         | Yangqe0147 | JF978586 | JN047144 | JF944238 | JF956271 |
| Eudicotyledons | Asteraceae     | <i>Sinosenecio</i> | <i>Sinosenecio euosmus</i>         | Yangqe0145 | JF978588 | JN047146 | JF944240 | JF956273 |
| Eudicotyledons | Asteraceae     | <i>Sinosenecio</i> | <i>Sinosenecio euosmus</i>         | Yangqe0143 | JF978589 | JN047148 | JF944242 | JF956275 |
| Eudicotyledons | Asteraceae     | <i>Sinosenecio</i> | <i>Sinosenecio dryas</i>           | Yangqe0120 | JF978584 | JN047142 | JF944234 | JF956268 |
| Eudicotyledons | Asteraceae     | <i>Sinosenecio</i> | <i>Sinosenecio dryas</i>           | Yangqe0121 | JF978583 | JN047141 | JF944233 | JF956267 |
| Eudicotyledons | Asteraceae     | <i>Sinosenecio</i> | <i>Sinosenecio dryas</i>           | Yangqe0122 | JF978582 | JN047140 | JF944232 | JF956266 |
| Eudicotyledons | Asteraceae     | <i>Sinosenecio</i> | <i>Sinosenecio denticulatus</i>    | Yangqe0090 | JF978580 | JN047138 | JF944230 | JF956264 |
| Eudicotyledons | Asteraceae     | <i>Sinosenecio</i> | <i>Sinosenecio denticulatus</i>    | Yangqe0092 | JF978578 | JN047136 | JF944228 | JF956262 |
| Eudicotyledons | Asteraceae     | <i>Sinosenecio</i> | <i>Sinosenecio denticulatus</i>    | Yangqe0089 | JF978581 | JN047139 | JF944231 | JF956265 |
| Eudicotyledons | Asteraceae     | <i>Sinosenecio</i> | <i>Sinosenecio denticulatus</i>    | Yangqe0091 | JF978579 | JN047137 | JF944229 | JF956263 |
| Eudicotyledons | Asteraceae     | <i>Sinosenecio</i> | <i>Sinosenecio</i>                 | Yangqe0109 | JF978577 | JN047135 | JF944227 | JF956261 |
| Eudicotyledons | Asteraceae     | <i>Sinosenecio</i> | <i>Sinosenecio</i>                 | Yangqe0111 | JF978575 | JN047133 | JF944225 | JF956259 |
| Eudicotyledons | Asteraceae     | <i>Sinosenecio</i> | <i>Sinosenecio</i>                 | Yangqe0110 | JF978576 | JN047134 | JF944226 | JF956260 |
| Eudicotyledons | Caryophyllacea | <i>Silene</i>      | <i>Silene firma</i>                | Z388       | JF978561 | JN047120 | JF944209 | JF956243 |
| Eudicotyledons | Caryophyllacea | <i>Silene</i>      | <i>Silene firma</i>                | Z390       | JF978559 | JN047118 | JF944207 | JF956241 |
| Eudicotyledons | Caryophyllacea | <i>Silene</i>      | <i>Silene firma</i>                | Z389       | JF978560 | JN047119 | JF944208 | JF956242 |
| Eudicotyledons | Caryophyllacea | <i>Silene</i>      | <i>Silene baccifera</i>            | Z383       | JF978558 | JN047117 | JF944206 | JF956240 |
| Eudicotyledons | Caryophyllacea | <i>Silene</i>      | <i>Silene baccifera</i>            | Z385       | JF978556 | JN047115 | JF944204 | JF956238 |
| Eudicotyledons | Caryophyllacea | <i>Silene</i>      | <i>Silene baccifera</i>            | Z384       | JF978557 | JN047116 | JF944205 | JF956239 |
| Eudicotyledons | Caryophyllacea | <i>Silene</i>      | <i>Silene baccifera</i>            | Z387       | JF978554 | JN047113 | JF944202 | JF956236 |
| Eudicotyledons | Caryophyllacea | <i>Silene</i>      | <i>Silene baccifera</i>            | Z386       | JF978555 | JN047114 | JF944203 | JF956237 |
| Eudicotyledons | Caryophyllacea | <i>Silene</i>      | <i>Silene aprica</i>               | Z379       | JF978545 | JN047104 | JF944193 | JF956227 |
| Eudicotyledons | Caryophyllacea | <i>Silene</i>      | <i>Silene aprica</i>               | A526       | JF978547 | JN047106 | JF944195 | JF956229 |
| Eudicotyledons | Caryophyllacea | <i>Silene</i>      | <i>Silene aprica</i>               | A520       | JF978552 | JN047111 | JF944200 | JF956234 |
| Eudicotyledons | Caryophyllacea | <i>Silene</i>      | <i>Silene aprica</i>               | A521       | JF978551 | JN047110 | JF944199 | JF956233 |
| Eudicotyledons | Caryophyllacea | <i>Silene</i>      | <i>Silene aprica</i>               | A525       | JF978548 | JN047107 | JF944196 | JF956230 |
| Eudicotyledons | Caryophyllacea | <i>Silene</i>      | <i>Silene aprica</i>               | Z380       | JF978544 | JN047103 | JF944192 | JF956226 |
| Eudicotyledons | Caryophyllacea | <i>Silene</i>      | <i>Silene aprica</i>               | A519       | JF978553 | JN047112 | JF944201 | JF956235 |
| Eudicotyledons | Caryophyllacea | <i>Silene</i>      | <i>Silene aprica</i>               | A524       | JF978549 | JN047108 | JF944197 | JF956231 |

|                |                 |                     |                                |       |          |          |          |          |
|----------------|-----------------|---------------------|--------------------------------|-------|----------|----------|----------|----------|
| Eudicotyledons | Caryophyllacea  | <i>Silene</i>       | <i>Silene aprica</i>           | A527  | JF978546 | JN047105 | JF944194 | JF956228 |
| Eudicotyledons | Caryophyllacea  | <i>Silene</i>       | <i>Silene aprica</i>           | A522  | JF978550 | JN047109 | JF944198 | JF956232 |
| Eudicotyledons | Caryophyllacea  | <i>Silene</i>       | <i>Silene aprica</i>           | Z382  | JF978543 | JN047101 | JF944190 | JF956224 |
| Eudicotyledons | Adoxaceae       | <i>Sambucus</i>     | <i>Sambucus chinensis</i>      | Z300  | JF978514 | JN047071 | JF944177 | JF956203 |
| Eudicotyledons | Adoxaceae       | <i>Sambucus</i>     | <i>Sambucus chinensis</i>      | Z301  | JF978513 | JN047070 | JF944176 | JF956202 |
| Eudicotyledons | Adoxaceae       | <i>Sambucus</i>     | <i>Sambucus chinensis</i>      | Z304  | JF978522 | JN047079 | JF944185 | JF956211 |
| Eudicotyledons | Adoxaceae       | <i>Sambucus</i>     | <i>Sambucus chinensis</i>      | Z306  | JF978520 | JN047077 | JF944183 | JF956209 |
| Eudicotyledons | Adoxaceae       | <i>Sambucus</i>     | <i>Sambucus chinensis</i>      | Z302  | JF978512 | JN047069 | JF944175 | JF956201 |
| Eudicotyledons | Adoxaceae       | <i>Sambucus</i>     | <i>Sambucus chinensis</i>      | Z305  | JF978521 | JN047078 | JF944184 | JF956210 |
| Eudicotyledons | Adoxaceae       | <i>Sambucus</i>     | <i>Sambucus chinensis</i>      | Z297  | JF978517 | JN047074 | JF944180 | JF956206 |
| Eudicotyledons | Adoxaceae       | <i>Sambucus</i>     | <i>Sambucus chinensis</i>      | Z296  | JF978518 | JN047075 | JF944181 | JF956207 |
| Eudicotyledons | Adoxaceae       | <i>Sambucus</i>     | <i>Sambucus chinensis</i>      | Z295  | JF978519 | JN047076 | JF944182 | JF956208 |
| Eudicotyledons | Adoxaceae       | <i>Sambucus</i>     | <i>Sambucus chinensis</i>      | Z299  | JF978515 | JN047072 | JF944178 | JF956204 |
| Eudicotyledons | Adoxaceae       | <i>Sambucus</i>     | <i>Sambucus chinensis</i>      | Z298  | JF978516 | JN047073 | JF944179 | JF956205 |
| Eudicotyledons | Adoxaceae       | <i>Sambucus</i>     | <i>Sambucus adnata</i>         | A511  | JF978509 | JN047067 | JF944172 | JF956198 |
| Eudicotyledons | Adoxaceae       | <i>Sambucus</i>     | <i>Sambucus adnata</i>         | A510  | JF978510 | JN047068 | JF944173 | JF956199 |
| Eudicotyledons | Adoxaceae       | <i>Sambucus</i>     | <i>Sambucus adnata</i>         | Z292  | JF978502 | JN047060 | JF944164 | JF956191 |
| Eudicotyledons | Adoxaceae       | <i>Sambucus</i>     | <i>Sambucus adnata</i>         | D1178 | JF978504 | JN047062 | JF944166 | JF956193 |
| Eudicotyledons | Adoxaceae       | <i>Sambucus</i>     | <i>Sambucus adnata</i>         | A512  | JF978508 | JN047066 | JF944171 | JF956197 |
| Eudicotyledons | Adoxaceae       | <i>Sambucus</i>     | <i>Sambucus adnata</i>         | A514  | JF978506 | JN047064 | JF944169 | JF956195 |
| Eudicotyledons | Adoxaceae       | <i>Sambucus</i>     | <i>Sambucus adnata</i>         | A516  | JF978505 | JN047063 | JF944168 | JF956194 |
| Eudicotyledons | Adoxaceae       | <i>Sambucus</i>     | <i>Sambucus adnata</i>         | A513  | JF978507 | JN047065 | JF944170 | JF956196 |
| Eudicotyledons | Adoxaceae       | <i>Sambucus</i>     | <i>Sambucus adnata</i>         | Z293  | JF978501 | JN047059 | JF944163 | JF956190 |
| Eudicotyledons | Adoxaceae       | <i>Sambucus</i>     | <i>Sambucus adnata</i>         | Z294  | JF978500 | JN047058 | JF944162 | JF956189 |
| Eudicotyledons | Adoxaceae       | <i>Sambucus</i>     | <i>Sambucus adnata</i>         | D955  | JF978503 | JN047061 | JF944165 | JF956192 |
| Eudicotyledons | Grossulariaceae | <i>Ribes</i>        | <i>Ribes himalense</i>         | D190  | JF978475 | JN047044 | JF944129 | JF956167 |
| Eudicotyledons | Grossulariaceae | <i>Ribes</i>        | <i>Ribes himalense</i>         | D957  | JF978473 | JN047042 | JF944127 | JF956166 |
| Eudicotyledons | Grossulariaceae | <i>Ribes</i>        | <i>Ribes alpestre</i>          | A492  | JF978468 | JN047034 | JF944119 | JF956158 |
| Eudicotyledons | Grossulariaceae | <i>Ribes</i>        | <i>Ribes alpestre</i>          | A487  | JF978472 | JN047039 | JF944124 | JF956163 |
| Eudicotyledons | Grossulariaceae | <i>Ribes</i>        | <i>Ribes alpestre</i>          | A489  | JF978470 | JN047037 | JF944122 | JF956161 |
| Eudicotyledons | Grossulariaceae | <i>Ribes</i>        | <i>Ribes alpestre</i>          | A488  | JF978471 | JN047038 | JF944123 | JF956162 |
| Eudicotyledons | Grossulariaceae | <i>Ribes</i>        | <i>Ribes alpestre</i>          | A490  | JF978469 | JN047036 | JF944121 | JF956160 |
| Eudicotyledons | Ericaceae       | <i>Rhododendron</i> | <i>Rhododendron yunnanense</i> | B259  | JF978464 | JN047029 | JF944114 | JF956154 |
| Eudicotyledons | Ericaceae       | <i>Rhododendron</i> | <i>Rhododendron yunnanense</i> | B697  | JF978462 | JN047027 | JF944112 | JF956153 |
| Eudicotyledons | Ericaceae       | <i>Rhododendron</i> | <i>Rhododendron yunnanense</i> | B699  | JF978461 | JN047026 | JF944111 | JF956152 |
| Eudicotyledons | Ericaceae       | <i>Rhododendron</i> | <i>Rhododendron yunnanense</i> | B700  | JF978460 | JN047025 | JF944110 | JF956151 |
| Eudicotyledons | Ericaceae       | <i>Rhododendron</i> | <i>xanthostephanum</i>         | B693  | JF978456 | JN047021 | JF944106 | JF956148 |
| Eudicotyledons | Ericaceae       | <i>Rhododendron</i> | <i>xanthostephanum</i>         | B692  | JF978457 | JN047022 | JF944107 | JF956149 |

|                |           |                     |                                     |      |          |          |          |          |
|----------------|-----------|---------------------|-------------------------------------|------|----------|----------|----------|----------|
| Eudicotyledons | Ericaceae | <i>Rhododendron</i> | <i>Rhododendron xanthostephanum</i> | B691 | JF978458 | JN047023 | JF944108 | JF956150 |
| Eudicotyledons | Ericaceae | <i>Rhododendron</i> | <i>Rhododendron wardii</i>          | B684 | JF978453 | JN047018 | JF944103 | JF956146 |
| Eudicotyledons | Ericaceae | <i>Rhododendron</i> | <i>Rhododendron wardii</i>          | B687 | JF978452 | JN047016 | JF944101 | JF956145 |
| Eudicotyledons | Ericaceae | <i>Rhododendron</i> | <i>Rhododendron wardii</i>          | B683 | JF978454 | JN047019 | JF944104 | JF956147 |
| Eudicotyledons | Ericaceae | <i>Rhododendron</i> | <i>Rhododendron wallichii</i>       | B682 | JF978450 | JN047014 | JF944099 | JF956143 |
| Eudicotyledons | Ericaceae | <i>Rhododendron</i> | <i>Rhododendron wallichii</i>       | B223 | JF978451 | JN047015 | JF944100 | JF956144 |
| Eudicotyledons | Ericaceae | <i>Rhododendron</i> | <i>Rhododendron virgatum</i>        | B679 | JF978449 | JN047013 | JF944098 | JF956142 |
| Eudicotyledons | Ericaceae | <i>Rhododendron</i> | <i>Rhododendron virgatum</i>        | B680 | JF978448 | JN047012 | JF944097 | JF956141 |
| Eudicotyledons | Ericaceae | <i>Rhododendron</i> | <i>Rhododendron vernicosum</i>      | B677 | JF978447 | JN047011 | JF944096 | JF956140 |
| Eudicotyledons | Ericaceae | <i>Rhododendron</i> | <i>Rhododendron vernicosum</i>      | B678 | JF978446 | JN047010 | JF944095 | JF956139 |
| Eudicotyledons | Ericaceae | <i>Rhododendron</i> | <i>Rhododendron</i>                 | B673 | JF978445 | JN047009 | JF944094 | JF956138 |
| Eudicotyledons | Ericaceae | <i>Rhododendron</i> | <i>Rhododendron</i>                 | B674 | JF978444 | JN047008 | JF944093 | JF956137 |
| Eudicotyledons | Ericaceae | <i>Rhododendron</i> | <i>Rhododendron</i>                 | B670 | JF978442 | JN047006 | JF944091 | JF956135 |
| Eudicotyledons | Ericaceae | <i>Rhododendron</i> | <i>Rhododendron</i>                 | B671 | JF978441 | JN047005 | JF944090 | JF956134 |
| Eudicotyledons | Ericaceae | <i>Rhododendron</i> | <i>Rhododendron</i>                 | B558 | JF978443 | JN047007 | JF944092 | JF956136 |
| Eudicotyledons | Ericaceae | <i>Rhododendron</i> | <i>Rhododendron triflorum</i>       | B666 | JF978439 | JN047003 | JF944088 | JF956133 |
| Eudicotyledons | Ericaceae | <i>Rhododendron</i> | <i>Rhododendron triflorum</i>       | B667 | JF978438 | JN047002 | JF944087 | JF956132 |
| Eudicotyledons | Ericaceae | <i>Rhododendron</i> | <i>Rhododendron trichostomum</i>    | B664 | JF978435 | JN046999 | JF944084 | JF956129 |
| Eudicotyledons | Ericaceae | <i>Rhododendron</i> | <i>Rhododendron trichostomum</i>    | B662 | JF978437 | JN047001 | JF944086 | JF956131 |
| Eudicotyledons | Ericaceae | <i>Rhododendron</i> | <i>Rhododendron trichostomum</i>    | B663 | JF978436 | JN047000 | JF944085 | JF956130 |
| Eudicotyledons | Ericaceae | <i>Rhododendron</i> | <i>Rhododendron trichocladum</i>    | B638 | JF978434 | JN046998 | JF944083 | JF956128 |
| Eudicotyledons | Ericaceae | <i>Rhododendron</i> | <i>Rhododendron trichocladum</i>    | B659 | JF978433 | JN046997 | JF944082 | JF956127 |
| Eudicotyledons | Ericaceae | <i>Rhododendron</i> | <i>Rhododendron trichocladum</i>    | B660 | JF978432 | JN046996 | JF944081 | JF956126 |
| Eudicotyledons | Ericaceae | <i>Rhododendron</i> | <i>Rhododendron traillianum</i>     | B658 | JF978427 | JN046991 | JF944076 | JF956121 |
| Eudicotyledons | Ericaceae | <i>Rhododendron</i> | <i>Rhododendron traillianum</i>     | B655 | JF978428 | JN046992 | JF944077 | JF956122 |
| Eudicotyledons | Ericaceae | <i>Rhododendron</i> | <i>Rhododendron traillianum</i>     | B654 | JF978429 | JN046993 | JF944078 | JF956123 |
| Eudicotyledons | Ericaceae | <i>Rhododendron</i> | <i>Rhododendron telmateium</i>      | B650 | JF978422 | JN046986 | JF944071 | JF956117 |
| Eudicotyledons | Ericaceae | <i>Rhododendron</i> | <i>Rhododendron telmateium</i>      | B210 | JF978424 | JN046988 | JF944073 | JF956118 |
| Eudicotyledons | Ericaceae | <i>Rhododendron</i> | <i>Rhododendron stewartianum</i>    | B636 | JF978415 | JN046979 | JF944063 | JF956110 |
| Eudicotyledons | Ericaceae | <i>Rhododendron</i> | <i>Rhododendron stewartianum</i>    | B632 | JF978416 | JN046980 | JF944064 | JF956111 |



|                |           |                     |                                    |      |          |          |          |          |
|----------------|-----------|---------------------|------------------------------------|------|----------|----------|----------|----------|
| Eudicotyledons | Ericaceae | <i>Rhododendron</i> | <i>Rhododendron stewartianum</i>   | B272 | JF978418 | JN046982 | JF944066 | JF956113 |
| Eudicotyledons | Ericaceae | <i>Rhododendron</i> | <i>Rhododendron stewartianum</i>   | B637 | JF978414 | JN046978 | JF944062 | JF956109 |
| Eudicotyledons | Ericaceae | <i>Rhododendron</i> | <i>Rhododendron stewartianum</i>   | B262 | JF978419 | JN046983 | JF944067 | JF956114 |
| Eudicotyledons | Ericaceae | <i>Rhododendron</i> | <i>Rhododendron stewartianum</i>   | B275 | JF978417 | JN046981 | JF944065 | JF956112 |
| Eudicotyledons | Ericaceae | <i>Rhododendron</i> | <i>Rhododendron</i>                | B627 | JF978413 | JN046975 | JF944059 | JF956108 |
| Eudicotyledons | Ericaceae | <i>Rhododendron</i> | <i>Rhododendron</i>                | B628 | JF978412 | JN046974 | JF944058 | JF956107 |
| Eudicotyledons | Ericaceae | <i>Rhododendron</i> | <i>Rhododendron sphaeroblastum</i> | B626 | JF978409 | JN046971 | JF944055 | JF956104 |
| Eudicotyledons | Ericaceae | <i>Rhododendron</i> | <i>Rhododendron sphaeroblastum</i> | B303 | JF978410 | JN046972 | JF944056 | JF956105 |
| Eudicotyledons | Ericaceae | <i>Rhododendron</i> | <i>Rhododendron sinonuttallii</i>  | B622 | JF978407 | JN046969 | JF944053 | JF956102 |
| Eudicotyledons | Ericaceae | <i>Rhododendron</i> | <i>Rhododendron sinonuttallii</i>  | B620 | JF978408 | JN046970 | JF944054 | JF956103 |
| Eudicotyledons | Ericaceae | <i>Rhododendron</i> | <i>Rhododendron sinogrande</i>     | B617 | JF978404 | JN046966 | JF944050 | JF956099 |
| Eudicotyledons | Ericaceae | <i>Rhododendron</i> | <i>Rhododendron sinogrande</i>     | B616 | JF978405 | JN046967 | JF944051 | JF956100 |
| Eudicotyledons | Ericaceae | <i>Rhododendron</i> | <i>Rhododendron sinogrande</i>     | B245 | JF978406 | JN046968 | JF944052 | JF956101 |
| Eudicotyledons | Ericaceae | <i>Rhododendron</i> | <i>Rhododendron sinogrande</i>     | B619 | JF978402 | JN046964 | JF944048 | JF956098 |
| Eudicotyledons | Ericaceae | <i>Rhododendron</i> | <i>Rhododendron selense</i>        | B379 | JF978395 | JN046955 | JF944039 | JF956091 |
| Eudicotyledons | Ericaceae | <i>Rhododendron</i> | <i>Rhododendron selense</i>        | B263 | JF978397 | JN046957 | JF944041 | JF956093 |
| Eudicotyledons | Ericaceae | <i>Rhododendron</i> | <i>Rhododendron selense</i>        | B274 | JF978396 | JN046956 | JF944040 | JF956092 |
| Eudicotyledons | Ericaceae | <i>Rhododendron</i> | <i>Rhododendron</i>                | B572 | JF978381 | JN046940 | JF944024 | JF956077 |
| Eudicotyledons | Ericaceae | <i>Rhododendron</i> | <i>Rhododendron</i>                | B571 | JF978382 | JN046941 | JF944025 | JF956078 |
| Eudicotyledons | Ericaceae | <i>Rhododendron</i> | <i>Rhododendron</i>                | B590 | JF978378 | JN046937 | JF944021 | JF956074 |
| Eudicotyledons | Ericaceae | <i>Rhododendron</i> | <i>Rhododendron</i>                | B569 | JF978383 | JN046942 | JF944026 | JF956079 |
| Eudicotyledons | Ericaceae | <i>Rhododendron</i> | <i>Rhododendron</i>                | B589 | JF978379 | JN046938 | JF944022 | JF956075 |
| Eudicotyledons | Ericaceae | <i>Rhododendron</i> | <i>Rhododendron</i>                | B242 | JF978384 | JN046943 | JF944027 | JF956080 |
| Eudicotyledons | Ericaceae | <i>Rhododendron</i> | <i>Rhododendron</i>                | B588 | JF978380 | JN046939 | JF944023 | JF956076 |
| Eudicotyledons | Ericaceae | <i>Rhododendron</i> | <i>Rhododendron racemosum</i>      | B565 | JF978371 | JN046932 | JF944014 | JF956067 |
| Eudicotyledons | Ericaceae | <i>Rhododendron</i> | <i>Rhododendron racemosum</i>      | B564 | JF978372 | JN046933 | JF944015 | JF956068 |
| Eudicotyledons | Ericaceae | <i>Rhododendron</i> | <i>Rhododendron racemosum</i>      | B563 | JF978373 | JN046934 | JF944016 | JF956069 |
| Eudicotyledons | Ericaceae | <i>Rhododendron</i> | <i>Rhododendron primuliflorum</i>  | B665 | JF978367 | JN046929 | JF944010 | JF956063 |
| Eudicotyledons | Ericaceae | <i>Rhododendron</i> | <i>Rhododendron primuliflorum</i>  | B203 | JF978369 | JN046931 | JF944012 | JF956065 |
| Eudicotyledons | Ericaceae | <i>Rhododendron</i> | <i>Rhododendron primuliflorum</i>  | B209 | JF978368 | JN046930 | JF944011 | JF956064 |
| Eudicotyledons | Ericaceae | <i>Rhododendron</i> | <i>Rhododendron pendulum</i>       | B219 | JF978359 | JN046921 | JF944002 | JF956055 |

|                |           |                     |                                  |      |          |          |          |          |
|----------------|-----------|---------------------|----------------------------------|------|----------|----------|----------|----------|
| Eudicotyledons | Ericaceae | <i>Rhododendron</i> | <i>Rhododendron pendulum</i>     | B540 | JF978358 | JN046920 | JF944001 | JF956054 |
| Eudicotyledons | Ericaceae | <i>Rhododendron</i> | <i>Rhododendron</i>              | B536 | JF978357 | JN046919 | JF944000 | JF956053 |
| Eudicotyledons | Ericaceae | <i>Rhododendron</i> | <i>Rhododendron</i>              | B538 | JF978355 | JN046917 | JF943998 | JF956051 |
| Eudicotyledons | Ericaceae | <i>Rhododendron</i> | <i>Rhododendron</i>              | B537 | JF978356 | JN046918 | JF943999 | JF956052 |
| Eudicotyledons | Ericaceae | <i>Rhododendron</i> | <i>Rhododendron oreotrephes</i>  | B257 | JF978352 | JN046914 | JF943995 | JF956050 |
| Eudicotyledons | Ericaceae | <i>Rhododendron</i> | <i>Rhododendron oreotrephes</i>  | B531 | JF978348 | JN046909 | JF943990 | JF956046 |
| Eudicotyledons | Ericaceae | <i>Rhododendron</i> | <i>Rhododendron oreotrephes</i>  | B527 | JF978350 | JN046911 | JF943992 | JF956048 |
| Eudicotyledons | Ericaceae | <i>Rhododendron</i> | <i>Rhododendron oreotrephes</i>  | B529 | JF978349 | JN046910 | JF943991 | JF956047 |
| Eudicotyledons | Ericaceae | <i>Rhododendron</i> | <i>Rhododendron oreotrephes</i>  | B644 | JF978347 | JN046908 | JF943989 | JF956045 |
| Eudicotyledons | Ericaceae | <i>Rhododendron</i> | <i>Rhododendron oreotrephes</i>  | B526 | JF978351 | JN046912 | JF943993 | JF956049 |
| Eudicotyledons | Ericaceae | <i>Rhododendron</i> | <i>Rhododendron nyingchiense</i> | B524 | JF978345 | JN046906 | JF943987 | JF956043 |
| Eudicotyledons | Ericaceae | <i>Rhododendron</i> | <i>Rhododendron nyingchiense</i> | B523 | JF978346 | JN046907 | JF943988 | JF956044 |
| Eudicotyledons | Ericaceae | <i>Rhododendron</i> | <i>Rhododendron nivale</i>       | B647 | JF978337 | JN046898 | JF943979 | JF956035 |
| Eudicotyledons | Ericaceae | <i>Rhododendron</i> | <i>Rhododendron nivale</i>       | B247 | JF978342 | JN046903 | JF943984 | JF956040 |
| Eudicotyledons | Ericaceae | <i>Rhododendron</i> | <i>Rhododendron nivale</i>       | B207 | JF978344 | JN046905 | JF943986 | JF956042 |
| Eudicotyledons | Ericaceae | <i>Rhododendron</i> | <i>Rhododendron nivale</i>       | B208 | JF978343 | JN046904 | JF943985 | JF956041 |
| Eudicotyledons | Ericaceae | <i>Rhododendron</i> | <i>Rhododendron nivale</i>       | B532 | JF978338 | JN046899 | JF943980 | JF956036 |
| Eudicotyledons | Ericaceae | <i>Rhododendron</i> | <i>Rhododendron nivale</i>       | B522 | JF978339 | JN046900 | JF943981 | JF956037 |
| Eudicotyledons | Ericaceae | <i>Rhododendron</i> | <i>Rhododendron nivale</i>       | B648 | JF978336 | JN046897 | JF943978 | JF956034 |
| Eudicotyledons | Ericaceae | <i>Rhododendron</i> | <i>Rhododendron nivale</i>       | B518 | JF978341 | JN046902 | JF943983 | JF956039 |
| Eudicotyledons | Ericaceae | <i>Rhododendron</i> | <i>Rhododendron nivale</i>       | B520 | JF978340 | JN046901 | JF943982 | JF956038 |
| Eudicotyledons | Ericaceae | <i>Rhododendron</i> | <i>Rhododendron monanthum</i>    | B284 | JF978333 | JN046889 | JF943970 | JF956030 |
| Eudicotyledons | Ericaceae | <i>Rhododendron</i> | <i>Rhododendron monanthum</i>    | B508 | JF978331 | JN046887 | JF943968 | JF956028 |
| Eudicotyledons | Ericaceae | <i>Rhododendron</i> | <i>Rhododendron monanthum</i>    | B507 | JF978332 | JN046888 | JF943969 | JF956029 |
| Eudicotyledons | Ericaceae | <i>Rhododendron</i> | <i>Rhododendron</i>              | B505 | JF978327 | JN046883 | JF943964 | JF956024 |
| Eudicotyledons | Ericaceae | <i>Rhododendron</i> | <i>Rhododendron</i>              | B503 | JF978328 | JN046884 | JF943965 | JF956025 |
| Eudicotyledons | Ericaceae | <i>Rhododendron</i> | <i>Rhododendron</i>              | B502 | JF978329 | JN046885 | JF943966 | JF956026 |
| Eudicotyledons | Ericaceae | <i>Rhododendron</i> | <i>Rhododendron</i>              | B501 | JF978330 | JN046886 | JF943967 | JF956027 |
| Eudicotyledons | Ericaceae | <i>Rhododendron</i> | <i>Rhododendron mariesii</i>     | B499 | JF978322 | JN046878 | JF943960 | JF956019 |
| Eudicotyledons | Ericaceae | <i>Rhododendron</i> | <i>Rhododendron mariesii</i>     | B498 | JF978323 | JN046879 | JF943961 | JF956020 |
| Eudicotyledons | Ericaceae | <i>Rhododendron</i> | <i>Rhododendron maddenii</i>     | B497 | JF978319 | JN046875 | JF943957 | JF956017 |
| Eudicotyledons | Ericaceae | <i>Rhododendron</i> | <i>Rhododendron maddenii</i>     | B221 | JF978321 | JN046877 | JF943959 | JF956018 |
| Eudicotyledons | Ericaceae | <i>Rhododendron</i> | <i>Rhododendron mackenzianum</i> | B495 | JF978317 | JN046873 | JF943956 | JF956016 |
| Eudicotyledons | Ericaceae | <i>Rhododendron</i> | <i>Rhododendron mackenzianum</i> | B496 | JF978316 | JN046872 | JF943955 | JF956015 |
| Eudicotyledons | Ericaceae | <i>Rhododendron</i> | <i>Rhododendron lukiangense</i>  | B244 | JF978315 | JN046871 | JF943954 | JF956014 |
| Eudicotyledons | Ericaceae | <i>Rhododendron</i> | <i>Rhododendron lukiangense</i>  | B492 | JF978314 | JN046870 | JF943953 | JF956013 |

|                |           |                     |                                              |      |          |          |          |          |
|----------------|-----------|---------------------|----------------------------------------------|------|----------|----------|----------|----------|
| Eudicotyledons | Ericaceae | <i>Rhododendron</i> | <i>Rhododendron leptothrium</i>              | B484 | JF978312 | JN046868 | JF943951 | JF956012 |
| Eudicotyledons | Ericaceae | <i>Rhododendron</i> | <i>Rhododendron leptothrium</i>              | B487 | JF978311 | JN046867 | JF943950 | JF956011 |
| Eudicotyledons | Ericaceae | <i>Rhododendron</i> | <i>Rhododendron lepidotum</i>                | B482 | JF978304 | JN046860 | JF943943 | JF956006 |
| Eudicotyledons | Ericaceae | <i>Rhododendron</i> | <i>Rhododendron lepidotum</i>                | B611 | JF978299 | JN046855 | JF943938 | JF956001 |
| Eudicotyledons | Ericaceae | <i>Rhododendron</i> | <i>Rhododendron lepidotum</i>                | B483 | JF978303 | JN046859 | JF943942 | JF956005 |
| Eudicotyledons | Ericaceae | <i>Rhododendron</i> | <i>Rhododendron lepidotum</i>                | B227 | JF978306 | JN046862 | JF943945 | JF956008 |
| Eudicotyledons | Ericaceae | <i>Rhododendron</i> | <i>Rhododendron lepidotum</i>                | B236 | JF978305 | JN046861 | JF943944 | JF956007 |
| Eudicotyledons | Ericaceae | <i>Rhododendron</i> | <i>Rhododendron lepidotum</i>                | B609 | JF978300 | JN046856 | JF943939 | JF956002 |
| Eudicotyledons | Ericaceae | <i>Rhododendron</i> | <i>Rhododendron lepidotum</i>                | B215 | JF978307 | JN046863 | JF943946 | JF956009 |
| Eudicotyledons | Ericaceae | <i>Rhododendron</i> | <i>Rhododendron lepidotum</i>                | B214 | JF978308 | JN046864 | JF943947 | JF956010 |
| Eudicotyledons | Ericaceae | <i>Rhododendron</i> | <i>Rhododendron lepidotum</i>                | B556 | JF978302 | JN046858 | JF943941 | JF956004 |
| Eudicotyledons | Ericaceae | <i>Rhododendron</i> | <i>Rhododendron lepidotum</i>                | B607 | JF978301 | JN046857 | JF943940 | JF956003 |
| Eudicotyledons | Ericaceae | <i>Rhododendron</i> | <i>Rhododendron lacteum</i>                  | B477 | JF978298 | JN046854 | JF943937 | JF956000 |
| Eudicotyledons | Ericaceae | <i>Rhododendron</i> | <i>Rhododendron lacteum</i>                  | B478 | JF978297 | JN046853 | JF943936 | JF955999 |
| Eudicotyledons | Ericaceae | <i>Rhododendron</i> | <i>Rhododendron lacteum</i>                  | B479 | JF978296 | JN046852 | JF943935 | JF955998 |
| Eudicotyledons | Ericaceae | <i>Rhododendron</i> | <i>Rhododendron keleticum</i>                | B255 | JF978295 | JN046851 | JF943934 | JF955997 |
| Eudicotyledons | Ericaceae | <i>Rhododendron</i> | <i>Rhododendron keleticum</i>                | B473 | JF978294 | JN046850 | JF943933 | JF955996 |
| Eudicotyledons | Ericaceae | <i>Rhododendron</i> | <i>Rhododendron irroratum</i>                | B468 | JF978292 | JN046848 | JF943931 | JF955994 |
| Eudicotyledons | Ericaceae | <i>Rhododendron</i> | <i>Rhododendron irroratum</i>                | B470 | JF978290 | JN046846 | JF943929 | JF955993 |
| Eudicotyledons | Ericaceae | <i>Rhododendron</i> | <i>Rhododendron irroratum</i>                | B465 | JF978293 | JN046849 | JF943932 | JF955995 |
| Eudicotyledons | Ericaceae | <i>Rhododendron</i> | <i>Rhododendron impeditum</i>                | B463 | JF978287 | JN046843 | JF943926 | JF955990 |
| Eudicotyledons | Ericaceae | <i>Rhododendron</i> | <i>Rhododendron impeditum</i>                | B199 | JF978289 | JN046845 | JF943928 | JF955992 |
| Eudicotyledons | Ericaceae | <i>Rhododendron</i> | <i>Rhododendron impeditum</i>                | B294 | JF978288 | JN046844 | JF943927 | JF955991 |
| Eudicotyledons | Ericaceae | <i>Rhododendron</i> | <i>Rhododendron</i><br><i>hippophaeoides</i> | B240 | JF978286 | JN046841 | JF943925 | JF955989 |
| Eudicotyledons | Ericaceae | <i>Rhododendron</i> | <i>Rhododendron</i><br><i>hippophaeoides</i> | B461 | JF978285 | JN046840 | JF943924 | JF955988 |
| Eudicotyledons | Ericaceae | <i>Rhododendron</i> | <i>Rhododendron heliolepis</i>               | B286 | JF978284 | JN046839 | JF943923 | JF955987 |
| Eudicotyledons | Ericaceae | <i>Rhododendron</i> | <i>Rhododendron heliolepis</i>               | B460 | JF978281 | JN046836 | JF943920 | JF955985 |
| Eudicotyledons | Ericaceae | <i>Rhododendron</i> | <i>Rhododendron heliolepis</i>               | B304 | JF978283 | JN046838 | JF943922 | JF955986 |
| Eudicotyledons | Ericaceae | <i>Rhododendron</i> | <i>Rhododendron haematodes</i>               | B458 | JF978275 | JN046830 | JF943914 | JF955979 |
| Eudicotyledons | Ericaceae | <i>Rhododendron</i> | <i>Rhododendron haematodes</i>               | B457 | JF978276 | JN046831 | JF943915 | JF955980 |
| Eudicotyledons | Ericaceae | <i>Rhododendron</i> | <i>Rhododendron haematodes</i>               | B456 | JF978277 | JN046832 | JF943916 | JF955981 |
| Eudicotyledons | Ericaceae | <i>Rhododendron</i> | <i>Rhododendron haematodes</i>               | B450 | JF978280 | JN046835 | JF943919 | JF955984 |
| Eudicotyledons | Ericaceae | <i>Rhododendron</i> | <i>Rhododendron haematodes</i>               | B453 | JF978278 | JN046833 | JF943917 | JF955982 |
| Eudicotyledons | Ericaceae | <i>Rhododendron</i> | <i>Rhododendron haematodes</i>               | B452 | JF978279 | JN046834 | JF943918 | JF955983 |
| Eudicotyledons | Ericaceae | <i>Rhododendron</i> | <i>Rhododendron glischrum</i>                | B446 | JF978274 | JN046829 | JF943913 | JF955978 |
| Eudicotyledons | Ericaceae | <i>Rhododendron</i> | <i>Rhododendron glischrum</i>                | B448 | JF978273 | JN046828 | JF943912 | JF955977 |
| Eudicotyledons | Ericaceae | <i>Rhododendron</i> | <i>Rhododendron</i><br><i>genestierianum</i> | B444 | JF978272 | JN046827 | JF943911 | JF955976 |

|                |           |                     |                                    |      |          |          |          |          |
|----------------|-----------|---------------------|------------------------------------|------|----------|----------|----------|----------|
| Eudicotyledons | Ericaceae | <i>Rhododendron</i> | <i>Rhododendron genestierianum</i> | B445 | JF978271 | JN046826 | JF943910 | JF955975 |
| Eudicotyledons | Ericaceae | <i>Rhododendron</i> | <i>Rhododendron fulvum</i>         | B439 | JF978268 | JN046823 | JF943907 | JF955974 |
| Eudicotyledons | Ericaceae | <i>Rhododendron</i> | <i>Rhododendron fulvum</i>         | B440 | JF978267 | JN046822 | JF943906 | JF955973 |
| Eudicotyledons | Ericaceae | <i>Rhododendron</i> | <i>Rhododendron fragariiflorum</i> | B560 | JF978265 | JN046820 | JF943904 | JF955971 |
| Eudicotyledons | Ericaceae | <i>Rhododendron</i> | <i>Rhododendron fragariiflorum</i> | B437 | JF978266 | JN046821 | JF943905 | JF955972 |
| Eudicotyledons | Ericaceae | <i>Rhododendron</i> | <i>Rhododendron forrestii</i>      | B435 | JF978264 | JN046819 | JF943903 | JF955970 |
| Eudicotyledons | Ericaceae | <i>Rhododendron</i> | <i>Rhododendron forrestii</i>      | B436 | JF978263 | JN046818 | JF943902 | JF955969 |
| Eudicotyledons | Ericaceae | <i>Rhododendron</i> | <i>Rhododendron floccigerum</i>    | B434 | JF978259 | JN046814 | JF943898 | JF955965 |
| Eudicotyledons | Ericaceae | <i>Rhododendron</i> | <i>Rhododendron floccigerum</i>    | B418 | JF978262 | JN046817 | JF943901 | JF955968 |
| Eudicotyledons | Ericaceae | <i>Rhododendron</i> | <i>Rhododendron floccigerum</i>    | B431 | JF978260 | JN046815 | JF943899 | JF955966 |
| Eudicotyledons | Ericaceae | <i>Rhododendron</i> | <i>Rhododendron floccigerum</i>    | B430 | JF978261 | JN046816 | JF943900 | JF955967 |
| Eudicotyledons | Ericaceae | <i>Rhododendron</i> | <i>Rhododendron fastigiatum</i>    | B300 | JF978256 | JN046811 | JF943895 | JF955962 |
| Eudicotyledons | Ericaceae | <i>Rhododendron</i> | <i>Rhododendron fastigiatum</i>    | B425 | JF978254 | JN046809 | JF943893 | JF955960 |
| Eudicotyledons | Ericaceae | <i>Rhododendron</i> | <i>Rhododendron fastigiatum</i>    | B424 | JF978255 | JN046810 | JF943894 | JF955961 |
| Eudicotyledons | Ericaceae | <i>Rhododendron</i> | <i>Rhododendron fastigiatum</i>    | B426 | JF978253 | JN046808 | JF943892 | JF955959 |
| Eudicotyledons | Ericaceae | <i>Rhododendron</i> | <i>Rhododendron emarginatum</i>    | B415 | JF978248 | JN046803 | JF943887 | JF955955 |
| Eudicotyledons | Ericaceae | <i>Rhododendron</i> | <i>Rhododendron emarginatum</i>    | B414 | JF978249 | JN046804 | JF943888 | JF955956 |
| Eudicotyledons | Ericaceae | <i>Rhododendron</i> | <i>Rhododendron edgeworthii</i>    | B406 | JF978246 | JN046801 | JF943885 | JF955953 |
| Eudicotyledons | Ericaceae | <i>Rhododendron</i> | <i>Rhododendron edgeworthii</i>    | B408 | JF978245 | JN046800 | JF943884 | JF955952 |
| Eudicotyledons | Ericaceae | <i>Rhododendron</i> | <i>Rhododendron edgeworthii</i>    | B410 | JF978243 | JN046798 | JF943882 | JF955950 |
| Eudicotyledons | Ericaceae | <i>Rhododendron</i> | <i>Rhododendron edgeworthii</i>    | B405 | JF978247 | JN046802 | JF943886 | JF955954 |
| Eudicotyledons | Ericaceae | <i>Rhododendron</i> | <i>Rhododendron edgeworthii</i>    | B409 | JF978244 | JN046799 | JF943883 | JF955951 |
| Eudicotyledons | Ericaceae | <i>Rhododendron</i> | <i>Rhododendron delavayi</i>       | B402 | JF978238 | JN046793 | JF943877 | JF955945 |
| Eudicotyledons | Ericaceae | <i>Rhododendron</i> | <i>Rhododendron delavayi</i>       | B400 | JF978240 | JN046795 | JF943879 | JF955947 |
| Eudicotyledons | Ericaceae | <i>Rhododendron</i> | <i>Rhododendron delavayi</i>       | B401 | JF978239 | JN046794 | JF943878 | JF955946 |
| Eudicotyledons | Ericaceae | <i>Rhododendron</i> | <i>Rhododendron delavayi</i>       | B398 | JF978242 | JN046797 | JF943881 | JF955949 |
| Eudicotyledons | Ericaceae | <i>Rhododendron</i> | <i>Rhododendron delavayi</i>       | B399 | JF978241 | JN046796 | JF943880 | JF955948 |
| Eudicotyledons | Ericaceae | <i>Rhododendron</i> | <i>Rhododendron decorum</i>        | B385 | JF978235 | JN046790 | JF943874 | JF955942 |
| Eudicotyledons | Ericaceae | <i>Rhododendron</i> | <i>Rhododendron decorum</i>        | B390 | JF978233 | JN046788 | JF943872 | JF955940 |
| Eudicotyledons | Ericaceae | <i>Rhododendron</i> | <i>Rhododendron decorum</i>        | B393 | JF978232 | JN046786 | JF943870 | JF955938 |
| Eudicotyledons | Ericaceae | <i>Rhododendron</i> | <i>Rhododendron decorum</i>        | B383 | JF978237 | JN046792 | JF943876 | JF955944 |
| Eudicotyledons | Ericaceae | <i>Rhododendron</i> | <i>Rhododendron decorum</i>        | B384 | JF978236 | JN046791 | JF943875 | JF955943 |
| Eudicotyledons | Ericaceae | <i>Rhododendron</i> | <i>Rhododendron decorum</i>        | B389 | JF978234 | JN046789 | JF943873 | JF955941 |
| Eudicotyledons | Ericaceae | <i>Rhododendron</i> | <i>Rhododendron complexum</i>      | B423 | JF978230 | JN046784 | JF943868 | JF955936 |
| Eudicotyledons | Ericaceae | <i>Rhododendron</i> | <i>Rhododendron complexum</i>      | B213 | JF978231 | JN046785 | JF943869 | JF955937 |

|                |           |                     |                                    |      |          |          |          |          |
|----------------|-----------|---------------------|------------------------------------|------|----------|----------|----------|----------|
| Eudicotyledons | Ericaceae | <i>Rhododendron</i> | <i>Rhododendron cephalanthum</i>   | B368 | JF978222 | JN046776 | JF943861 | JF955929 |
| Eudicotyledons | Ericaceae | <i>Rhododendron</i> | <i>Rhododendron cephalanthum</i>   | B366 | JF978223 | JN046777 | JF943862 | JF955930 |
| Eudicotyledons | Ericaceae | <i>Rhododendron</i> | <i>Rhododendron campylocarpum</i>  | B360 | JF978218 | JN046770 | JF943855 | JF955924 |
| Eudicotyledons | Ericaceae | <i>Rhododendron</i> | <i>Rhododendron campylocarpum</i>  | B353 | JF978221 | JN046774 | JF943859 | JF955927 |
| Eudicotyledons | Ericaceae | <i>Rhododendron</i> | <i>Rhododendron campylocarpum</i>  | B354 | JF978220 | JN046773 | JF943858 | JF955926 |
| Eudicotyledons | Ericaceae | <i>Rhododendron</i> | <i>Rhododendron campylocarpum</i>  | B355 | JF978219 | JN046772 | JF943857 | JF955925 |
| Eudicotyledons | Ericaceae | <i>Rhododendron</i> | <i>Rhododendron bureavii</i>       | B297 | JF978215 | JN046765 | JF943851 | JF955920 |
| Eudicotyledons | Ericaceae | <i>Rhododendron</i> | <i>Rhododendron bureavii</i>       | B306 | JF978214 | JN046764 | JF943850 | JF955919 |
| Eudicotyledons | Ericaceae | <i>Rhododendron</i> | <i>Rhododendron beesianum</i>      | B335 | JF978212 | JN046761 | JF943848 | JF955917 |
| Eudicotyledons | Ericaceae | <i>Rhododendron</i> | <i>Rhododendron beesianum</i>      | B336 | JF978211 | JN046760 | JF943847 | JF955916 |
| Eudicotyledons | Ericaceae | <i>Rhododendron</i> | <i>Rhododendron beesianum</i>      | B337 | JF978210 | JN046759 | JF943846 | JF955915 |
| Eudicotyledons | Ericaceae | <i>Rhododendron</i> | <i>Rhododendron beesianum</i>      | B338 | JF978209 | JN046758 | JF943845 | JF955914 |
| Eudicotyledons | Ericaceae | <i>Rhododendron</i> | <i>Rhododendron beesianum</i>      | B334 | JF978213 | JN046762 | JF943849 | JF955918 |
| Eudicotyledons | Ericaceae | <i>Rhododendron</i> | <i>Rhododendron bainbridgeanum</i> | B331 | JF978208 | JN046757 | JF943844 | JF955913 |
| Eudicotyledons | Ericaceae | <i>Rhododendron</i> | <i>Rhododendron bainbridgeanum</i> | B332 | JF978207 | JN046756 | JF943843 | JF955912 |
| Eudicotyledons | Ericaceae | <i>Rhododendron</i> | <i>Rhododendron arizelum</i>       | B330 | JF978203 | JN046752 | JF943839 | JF955908 |
| Eudicotyledons | Ericaceae | <i>Rhododendron</i> | <i>Rhododendron arizelum</i>       | B328 | JF978205 | JN046754 | JF943841 | JF955910 |
| Eudicotyledons | Ericaceae | <i>Rhododendron</i> | <i>Rhododendron arizelum</i>       | B266 | JF978206 | JN046755 | JF943842 | JF955911 |
| Eudicotyledons | Ericaceae | <i>Rhododendron</i> | <i>Rhododendron arizelum</i>       | B329 | JF978204 | JN046753 | JF943840 | JF955909 |
| Eudicotyledons | Ericaceae | <i>Rhododendron</i> | <i>Rhododendron arboreum</i>       | B396 | JF978200 | JN046749 | JF943836 | JF955905 |
| Eudicotyledons | Ericaceae | <i>Rhododendron</i> | <i>Rhododendron arboreum</i>       | B395 | JF978201 | JN046750 | JF943837 | JF955906 |
| Eudicotyledons | Ericaceae | <i>Rhododendron</i> | <i>Rhododendron arboreum</i>       | B397 | JF978199 | JN046748 | JF943835 | JF955904 |
| Eudicotyledons | Ericaceae | <i>Rhododendron</i> | <i>Rhododendron arboreum</i>       | B394 | JF978202 | JN046751 | JF943838 | JF955907 |
| Eudicotyledons | Ericaceae | <i>Rhododendron</i> | <i>Rhododendron araiophyllum</i>   | B326 | JF978197 | JN046746 | JF943833 | JF955902 |
| Eudicotyledons | Ericaceae | <i>Rhododendron</i> | <i>Rhododendron araiophyllum</i>   | B325 | JF978198 | JN046747 | JF943834 | JF955903 |
| Eudicotyledons | Ericaceae | <i>Rhododendron</i> | <i>Rhododendron aperantum</i>      | B324 | JF978194 | JN046743 | JF943830 | JF955899 |
| Eudicotyledons | Ericaceae | <i>Rhododendron</i> | <i>Rhododendron aperantum</i>      | B323 | JF978195 | JN046744 | JF943831 | JF955900 |
| Eudicotyledons | Ericaceae | <i>Rhododendron</i> | <i>Rhododendron aperantum</i>      | B322 | JF978196 | JN046745 | JF943832 | JF955901 |
| Eudicotyledons | Ericaceae | <i>Rhododendron</i> | <i>Rhododendron anthosphaerum</i>  | B258 | JF978193 | JN046742 | JF943829 | JF955898 |

|                |               |                     |                                   |             |          |          |          |          |
|----------------|---------------|---------------------|-----------------------------------|-------------|----------|----------|----------|----------|
| Eudicotyledons | Ericaceae     | <i>Rhododendron</i> | <i>Rhododendron anthosphaerum</i> | B318        | JF978192 | JN046741 | JF943828 | JF955897 |
| Eudicotyledons | Ericaceae     | <i>Rhododendron</i> | <i>Rhododendron anthosphaerum</i> | B321        | JF978190 | JN046739 | JF943826 | JF955895 |
| Eudicotyledons | Ericaceae     | <i>Rhododendron</i> | <i>Rhododendron anthosphaerum</i> | B319        | JF978191 | JN046740 | JF943827 | JF955896 |
| Eudicotyledons | Ericaceae     | <i>Rhododendron</i> | <i>Rhododendron agastum</i>       | B317        | JF978185 | JN046735 | JF943822 | JF955892 |
| Eudicotyledons | Ericaceae     | <i>Rhododendron</i> | <i>Rhododendron agastum</i>       | B315        | JF978186 | JN046736 | JF943823 | JF955893 |
| Eudicotyledons | Ericaceae     | <i>Rhododendron</i> | <i>Rhododendron</i>               | B310        | JF978182 | JN046732 | JF943819 | JF955891 |
| Eudicotyledons | Ericaceae     | <i>Rhododendron</i> | <i>Rhododendron</i>               | B311        | JF978181 | JN046731 | JF943818 | JF955890 |
| Eudicotyledons | Crassulaceae  | <i>Rhodiola</i>     | <i>Rhodiola kirilowii</i>         | D473        | JF978178 | JN046726 | JF943813 | JF955887 |
| Eudicotyledons | Crassulaceae  | <i>Rhodiola</i>     | <i>Rhodiola kirilowii</i>         | D1668       | JF978179 | JN046727 | JF943814 | JF955888 |
| Eudicotyledons | Crassulaceae  | <i>Rhodiola</i>     | <i>Rhodiola fastigiata</i>        | D1630       | JF978176 | JN046724 | JF943811 | JF955885 |
| Eudicotyledons | Crassulaceae  | <i>Rhodiola</i>     | <i>Rhodiola fastigiata</i>        | D097        | JF978177 | JN046725 | JF943812 | JF955886 |
| Eudicotyledons | Crassulaceae  | <i>Rhodiola</i>     | <i>Rhodiola bupleuroides</i>      | D1654       | JF978172 | JN046719 | JF943806 | JF955883 |
| Eudicotyledons | Crassulaceae  | <i>Rhodiola</i>     | <i>Rhodiola bupleuroides</i>      | D1251       | JF978173 | JN046720 | JF943807 | JF955884 |
| Eudicotyledons | Polygonaceae  | <i>Rheum</i>        | <i>Rheum tanguticum</i>           | PS2904MT07  | GQ434863 | GQ43548  | GQ43677  | GQ43430  |
| Eudicotyledons | Polygonaceae  | <i>Rheum</i>        | <i>Rheum tanguticum</i>           | PS2904MT09  | GQ434864 | GQ43548  | GQ43677  | GQ43430  |
| Eudicotyledons | Polygonaceae  | <i>Rheum</i>        | <i>Rheum tanguticum</i>           | PS2904MT03  | GQ434862 | GQ43548  | GQ43676  | GQ43430  |
| Eudicotyledons | Polygonaceae  | <i>Rheum</i>        | <i>Rheum officinale</i>           | PS2902MT09  | GQ434859 | GQ43547  | GQ43676  | GQ43429  |
| Eudicotyledons | Polygonaceae  | <i>Rheum</i>        | <i>Rheum officinale</i>           | PS2902MT08  | GQ434858 | GQ43547  | GQ43676  | GQ43429  |
| Eudicotyledons | Polygonaceae  | <i>Rheum</i>        | <i>Rheum officinale</i>           | PS2902MT03  | GQ434857 | GQ43547  | GQ43676  | GQ43429  |
| Eudicotyledons | Brassicaceae  | <i>Pugionium</i>    | <i>Pugionium dolabratum</i>       | Liujq0042   | JF978167 | JN046694 | JF943782 | JF955858 |
| Eudicotyledons | Brassicaceae  | <i>Pugionium</i>    | <i>Pugionium dolabratum</i>       | Liujq0033   | JF978169 | JN046696 | JF943784 | JF955860 |
| Eudicotyledons | Brassicaceae  | <i>Pugionium</i>    | <i>Pugionium dolabratum</i>       | Liujq0034-1 | JF978168 | JN046695 | JF943783 | JF955859 |
| Eudicotyledons | Brassicaceae  | <i>Pugionium</i>    | <i>Pugionium dolabratum</i>       | Liujq0022   | JF978170 | JN046697 | JF943785 | JF955861 |
| Eudicotyledons | Brassicaceae  | <i>Pugionium</i>    | <i>Pugionium dolabratum</i>       | Liujq0004   | JF978171 | JN046698 | JF943786 | JF955862 |
| Eudicotyledons | Brassicaceae  | <i>Pugionium</i>    | <i>Pugionium cornutum</i>         | Liujq0018-1 | JF978166 | JN046693 | JF943781 | JF955857 |
| Eudicotyledons | Brassicaceae  | <i>Pugionium</i>    | <i>Pugionium cornutum</i>         | Liujq0061   | JF978164 | JN046691 | JF943779 | JF955855 |
| Eudicotyledons | Brassicaceae  | <i>Pugionium</i>    | <i>Pugionium cornutum</i>         | Liujq0066   | JF978162 | JN046689 | JF943777 | JF955853 |
| Eudicotyledons | Brassicaceae  | <i>Pugionium</i>    | <i>Pugionium cornutum</i>         | Liujq0065   | JF978163 | JN046690 | JF943778 | JF955854 |
| Eudicotyledons | Brassicaceae  | <i>Pugionium</i>    | <i>Pugionium cornutum</i>         | Liujq0050   | JF978165 | JN046692 | JF943780 | JF955856 |
| Eudicotyledons | Orobanchaceae | <i>Pterygiella</i>  | <i>Pterygiella suffruticosa</i>   | DongLN-LC2  | JF978161 | JN046688 | JF943776 | JF955852 |
| Eudicotyledons | Orobanchaceae | <i>Pterygiella</i>  | <i>Pterygiella suffruticosa</i>   | DongLN-ML10 | JF978160 | JN046687 | JF943775 | JF955851 |
| Eudicotyledons | Orobanchaceae | <i>Pterygiella</i>  | <i>Pterygiella suffruticosa</i>   | DongLN-SP1B | JF978158 | JN046685 | JF943773 | JF955849 |
| Eudicotyledons | Orobanchaceae | <i>Pterygiella</i>  | <i>Pterygiella suffruticosa</i>   | DongLN-SP35 | JF978157 | JN046684 | JF943772 | JF955848 |
| Eudicotyledons | Orobanchaceae | <i>Pterygiella</i>  | <i>Pterygiella suffruticosa</i>   | DongLN-ML11 | JF978159 | JN046686 | JF943774 | JF955850 |
| Eudicotyledons | Orobanchaceae | <i>Pterygiella</i>  | <i>Pterygiella nigrescens</i>     | DongLN-NS1  | JF978156 | JN046683 | JF943771 | JF955847 |
| Eudicotyledons | Orobanchaceae | <i>Pterygiella</i>  | <i>Pterygiella nigrescens</i>     | DongLN-NS15 | JF978155 | JN046682 | JF943770 | JF955846 |
| Eudicotyledons | Orobanchaceae | <i>Pterygiella</i>  | <i>Pterygiella nigrescens</i>     | DongLN-NS9  | JF978154 | JN046681 | JF943769 | JF955845 |

|                |               |                    |                               |                            |          |          |          |          |
|----------------|---------------|--------------------|-------------------------------|----------------------------|----------|----------|----------|----------|
| Eudicotyledons | Orobanchaceae | <i>Pterygiella</i> | <i>Pterygiella duclouxii</i>  | DongLN-MZ8                 | JF978151 | JN046678 | JF943766 | JF955842 |
| Eudicotyledons | Orobanchaceae | <i>Pterygiella</i> | <i>Pterygiella duclouxii</i>  | DongLN-SP1A                | JF978150 | JN046677 | JF943765 | JF955841 |
| Eudicotyledons | Orobanchaceae | <i>Pterygiella</i> | <i>Pterygiella duclouxii</i>  | DongLN-XC12                | JF978149 | JN046676 | JF943764 | JF955840 |
| Eudicotyledons | Orobanchaceae | <i>Pterygiella</i> | <i>Pterygiella duclouxii</i>  | DongLN-DL11                | JF978153 | JN046680 | JF943768 | JF955844 |
| Eudicotyledons | Orobanchaceae | <i>Pterygiella</i> | <i>Pterygiella duclouxii</i>  | DongLN-ML6A                | JF978152 | JN046679 | JF943767 | JF955843 |
| Eudicotyledons | Orobanchaceae | <i>Pterygiella</i> | <i>Pterygiella duclouxii</i>  | DongLN-XS5                 | JF978148 | JN046675 | JF943763 | JF955839 |
| Eudicotyledons | Orobanchaceae | <i>Pterygiella</i> | <i>Pterygiella cylindrica</i> | DongLN-ML1                 | JF978147 | JN046674 | JF943762 | JF955838 |
| Eudicotyledons | Orobanchaceae | <i>Pterygiella</i> | <i>Pterygiella cylindrica</i> | DongLN-ML6B                | JF978145 | JN046672 | JF943760 | JF955836 |
| Eudicotyledons | Orobanchaceae | <i>Pterygiella</i> | <i>Pterygiella cylindrica</i> | DongLN-ML13                | JF978146 | JN046673 | JF943761 | JF955837 |
| Eudicotyledons | Rosaceae      | <i>Prunus</i>      | <i>Prunus persica</i>         | ZhouSL-f-pendula-Henan-032 | JF978124 | JN046657 | JF943751 | JF955825 |
| Eudicotyledons | Rosaceae      | <i>Prunus</i>      | <i>Prunus persica</i>         | ZhouSL-Henan-046           | JF978122 | JN046655 | JF943749 | JF955823 |
| Eudicotyledons | Rosaceae      | <i>Prunus</i>      | <i>Prunus persica</i>         | ZhouSL-Henan-045           | JF978123 | JN046656 | JF943750 | JF955824 |
| Eudicotyledons | Rosaceae      | <i>Prunus</i>      | <i>Prunus persica</i>         | ZhouSL-f-duplex-Henan-029  | JF978125 | JN046658 | JF943752 | JF955826 |
| Eudicotyledons | Rosaceae      | <i>Prunus</i>      | <i>Prunus persica</i>         | PS1117MT01                 | JF421469 | GQ43526  | GQ43659  | GQ43420  |
| Eudicotyledons | Rosaceae      | <i>Prunus</i>      | <i>Prunus mume</i>            | ZhouSL-136                 | JF978118 | JN046650 | JF943748 | JF955822 |
| Eudicotyledons | Rosaceae      | <i>Prunus</i>      | <i>Prunus mume</i>            | ZhouSL-Hubei-127           | JF978116 | JN046648 | JF943746 | JF955820 |
| Eudicotyledons | Rosaceae      | <i>Prunus</i>      | <i>Prunus mume</i>            | ZhouSL-Hubei-126           | JF978117 | JN046649 | JF943747 | JF955821 |
| Eudicotyledons | Rosaceae      | <i>Prunus</i>      | <i>Prunus mira</i>            | ZhouSL-Henan-028           | JF978114 | JN046646 | JF943745 | JF955818 |
| Eudicotyledons | Rosaceae      | <i>Prunus</i>      | <i>Prunus mira</i>            | ZhouSL-Sichuan-093         | JF978112 | JN046644 | JF943744 | JF955817 |
| Eudicotyledons | Rosaceae      | <i>Prunus</i>      | <i>Prunus kansuensis</i>      | ZhouSL-Henan-024           | JF978098 | JN046631 | JF943738 | JF955809 |
| Eudicotyledons | Rosaceae      | <i>Prunus</i>      | <i>Prunus kansuensis</i>      | ZhouSL-Henan-026           | JF978097 | JN046630 | JF943737 | JF955808 |
| Eudicotyledons | Rosaceae      | <i>Prunus</i>      | <i>Prunus ferganensis</i>     | ZhouSL-Henan-020           | JF978089 | JN046623 | JF943733 | JF955802 |
| Eudicotyledons | Rosaceae      | <i>Prunus</i>      | <i>Prunus ferganensis</i>     | ZhouSL-Henan-019           | JF978090 | JN046624 | JF943734 | JF955803 |
| Eudicotyledons | Rosaceae      | <i>Prunus</i>      | <i>Prunus armeniaca</i>       | ZhouSL-Liaojing-123        | JF978106 | JN046637 | JF943741 | JF955812 |
| Eudicotyledons | Rosaceae      | <i>Prunus</i>      | <i>Prunus armeniaca</i>       | ZhouSL-Liaojing-125        | JF978104 | JN046635 | JF943739 | JF955810 |
| Eudicotyledons | Rosaceae      | <i>Prunus</i>      | <i>Prunus armeniaca</i>       | ZhouSL-Liaojing-124        | JF978105 | JN046636 | JF943740 | JF955811 |
| Eudicotyledons | Primulaceae   | <i>Primula</i>     | <i>Primula yunnanensis</i>    | GXJ098                     | JF978069 | JN046601 | JF943728 | JF955793 |
| Eudicotyledons | Primulaceae   | <i>Primula</i>     | <i>Primula yunnanensis</i>    | GXJ099                     | JF978068 | JN046600 | JF943727 | JF955792 |
| Eudicotyledons | Primulaceae   | <i>Primula</i>     | <i>Primula wangii</i>         | GXJ271                     | JF978066 | JN046598 | JF943725 | JF955790 |
| Eudicotyledons | Primulaceae   | <i>Primula</i>     | <i>Primula wangii</i>         | GXJ270                     | JF978067 | JN046599 | JF943726 | JF955791 |
| Eudicotyledons | Primulaceae   | <i>Primula</i>     | <i>Primula tardiflora</i>     | GXJ222                     | JF978064 | JN046594 | JF943721 | JF955786 |
| Eudicotyledons | Primulaceae   | <i>Primula</i>     | <i>Primula tardiflora</i>     | GXJ204                     | JF978065 | JN046595 | JF943722 | JF955787 |
| Eudicotyledons | Primulaceae   | <i>Primula</i>     | <i>Primula szechuanica</i>    | GXJ181                     | JF978063 | JN046593 | JF943720 | JF955785 |
| Eudicotyledons | Primulaceae   | <i>Primula</i>     | <i>Primula szechuanica</i>    | GXJ182                     | JF978062 | JN046592 | JF943719 | JF955784 |
| Eudicotyledons | Primulaceae   | <i>Primula</i>     | <i>Primula spicata</i>        | GXJ219                     | JF978060 | JN046590 | JF943717 | JF955782 |
| Eudicotyledons | Primulaceae   | <i>Primula</i>     | <i>Primula spicata</i>        | GXJ188                     | JF978061 | JN046591 | JF943718 | JF955783 |
| Eudicotyledons | Primulaceae   | <i>Primula</i>     | <i>Primula sonchifolia</i>    | GXJ102                     | JF978059 | JN046589 | JF943716 | JF955781 |
| Eudicotyledons | Primulaceae   | <i>Primula</i>     | <i>Primula sonchifolia</i>    | GXJ103                     | JF978058 | JN046588 | JF943715 | JF955780 |
| Eudicotyledons | Primulaceae   | <i>Primula</i>     | <i>Primula sonchifolia</i>    | GXJ104                     | JF978057 | JN046587 | JF943714 | JF955779 |
| Eudicotyledons | Primulaceae   | <i>Primula</i>     | <i>Primula sonchifolia</i>    | GXJ105                     | JF978056 | JN046586 | JF943713 | JF955778 |

|                |             |                |                            |          |          |          |          |          |
|----------------|-------------|----------------|----------------------------|----------|----------|----------|----------|----------|
| Eudicotyledons | Primulaceae | <i>Primula</i> | <i>Primula sonchifolia</i> | GXJ106   | JF978055 | JN046585 | JF943712 | JF955777 |
| Eudicotyledons | Primulaceae | <i>Primula</i> | <i>Primula sinensis</i>    | GXJ225   | JF978052 | JN046582 | JF943709 | JF955774 |
| Eudicotyledons | Primulaceae | <i>Primula</i> | <i>Primula sinensis</i>    | GXJ224   | JF978053 | JN046583 | JF943710 | JF955775 |
| Eudicotyledons | Primulaceae | <i>Primula</i> | <i>Primula sinensis</i>    | GXJ207   | JF978054 | JN046584 | JF943711 | JF955776 |
| Eudicotyledons | Primulaceae | <i>Primula</i> | <i>Primula sikkimensis</i> | GXJ147   | JF978051 | JN046581 | JF943708 | JF955773 |
| Eudicotyledons | Primulaceae | <i>Primula</i> | <i>Primula sikkimensis</i> | GXJ151   | JF978047 | JN046577 | JF943704 | JF955769 |
| Eudicotyledons | Primulaceae | <i>Primula</i> | <i>Primula sikkimensis</i> | GXJ150   | JF978048 | JN046578 | JF943705 | JF955770 |
| Eudicotyledons | Primulaceae | <i>Primula</i> | <i>Primula sikkimensis</i> | GXJ149   | JF978049 | JN046579 | JF943706 | JF955771 |
| Eudicotyledons | Primulaceae | <i>Primula</i> | <i>Primula sikkimensis</i> | GXJ148   | JF978050 | JN046580 | JF943707 | JF955772 |
| Eudicotyledons | Primulaceae | <i>Primula</i> | <i>Primula septemloba</i>  | GXJ129   | JF978046 | JN046576 | JF943703 | JF955768 |
| Eudicotyledons | Primulaceae | <i>Primula</i> | <i>Primula septemloba</i>  | GXJ130   | JF978045 | JN046575 | JF943702 | JF955767 |
| Eudicotyledons | Primulaceae | <i>Primula</i> | <i>Primula rugosa</i>      | GXJ265   | JF978044 | JN046574 | JF943701 | JF955764 |
| Eudicotyledons | Primulaceae | <i>Primula</i> | <i>Primula rugosa</i>      | GXJ267   | JF978042 | JN046572 | JF943699 | JF955762 |
| Eudicotyledons | Primulaceae | <i>Primula</i> | <i>Primula rugosa</i>      | GXJ266   | JF978043 | JN046573 | JF943700 | JF955763 |
| Eudicotyledons | Primulaceae | <i>Primula</i> | <i>Primula pycnoloba</i>   | GXJ239   | JF978039 | JN046569 | JF943696 | JF955759 |
| Eudicotyledons | Primulaceae | <i>Primula</i> | <i>Primula pycnoloba</i>   | GXJ237   | JF978041 | JN046571 | JF943698 | JF955761 |
| Eudicotyledons | Primulaceae | <i>Primula</i> | <i>Primula pycnoloba</i>   | GXJ238   | JF978040 | JN046570 | JF943697 | JF955760 |
| Eudicotyledons | Primulaceae | <i>Primula</i> | <i>Primula pulchella</i>   | GXJ117   | JF978034 | JN046564 | JF943691 | JF955754 |
| Eudicotyledons | Primulaceae | <i>Primula</i> | <i>Primula pulchella</i>   | GXJ114   | JF978037 | JN046567 | JF943694 | JF955757 |
| Eudicotyledons | Primulaceae | <i>Primula</i> | <i>Primula pulchella</i>   | GXJ116   | JF978035 | JN046565 | JF943692 | JF955755 |
| Eudicotyledons | Primulaceae | <i>Primula</i> | <i>Primula pulchella</i>   | GXJ115   | JF978036 | JN046566 | JF943693 | JF955756 |
| Eudicotyledons | Primulaceae | <i>Primula</i> | <i>Primula pulchella</i>   | GXJ113   | JF978038 | JN046568 | JF943695 | JF955758 |
| Eudicotyledons | Primulaceae | <i>Primula</i> | <i>Primula prattii</i>     | GXJ136-2 | JF978032 | JN046562 | JF943689 | JF955752 |
| Eudicotyledons | Primulaceae | <i>Primula</i> | <i>Primula prattii</i>     | GXJ136-1 | JF978033 | JN046563 | JF943690 | JF955753 |
| Eudicotyledons | Primulaceae | <i>Primula</i> | <i>Primula polyneura</i>   | GXJ274   | JF978029 | JN046559 | JF943686 | JF955749 |
| Eudicotyledons | Primulaceae | <i>Primula</i> | <i>Primula polyneura</i>   | GXJ165   | JF978030 | JN046560 | JF943687 | JF955750 |
| Eudicotyledons | Primulaceae | <i>Primula</i> | <i>Primula polyneura</i>   | GXJ164   | JF978031 | JN046561 | JF943688 | JF955751 |
| Eudicotyledons | Primulaceae | <i>Primula</i> | <i>Primula partschiana</i> | GXJ208   | JF978028 | JN046558 | JF943685 | JF955748 |
| Eudicotyledons | Primulaceae | <i>Primula</i> | <i>Primula partschiana</i> | GXJ209   | JF978027 | JN046557 | JF943684 | JF955747 |
| Eudicotyledons | Primulaceae | <i>Primula</i> | <i>Primula ovalifolia</i>  | GXJ202   | JF978023 | JN046553 | JF943680 | JF955743 |
| Eudicotyledons | Primulaceae | <i>Primula</i> | <i>Primula ovalifolia</i>  | GXJ199   | JF978026 | JN046556 | JF943683 | JF955746 |
| Eudicotyledons | Primulaceae | <i>Primula</i> | <i>Primula ovalifolia</i>  | GXJ203   | JF978022 | JN046552 | JF943679 | JF955742 |
| Eudicotyledons | Primulaceae | <i>Primula</i> | <i>Primula ovalifolia</i>  | GXJ201   | JF978024 | JN046554 | JF943681 | JF955744 |
| Eudicotyledons | Primulaceae | <i>Primula</i> | <i>Primula ovalifolia</i>  | GXJ200   | JF978025 | JN046555 | JF943682 | JF955745 |
| Eudicotyledons | Primulaceae | <i>Primula</i> | <i>Primula oreodoxa</i>    | GXJ223   | JF978020 | JN046550 | JF943677 | JF955740 |
| Eudicotyledons | Primulaceae | <i>Primula</i> | <i>Primula oreodoxa</i>    | GXJ206   | JF978021 | JN046551 | JF943678 | JF955741 |
| Eudicotyledons | Primulaceae | <i>Primula</i> | <i>Primula obconica</i>    | GXJ110   | JF978018 | JN046548 | JF943675 | JF955738 |
| Eudicotyledons | Primulaceae | <i>Primula</i> | <i>Primula obconica</i>    | GXJ109   | JF978019 | JN046549 | JF943676 | JF955739 |
| Eudicotyledons | Primulaceae | <i>Primula</i> | <i>Primula munroi</i>      | GXJ146   | JF978013 | JN046543 | JF943670 | JF955733 |
| Eudicotyledons | Primulaceae | <i>Primula</i> | <i>Primula munroi</i>      | GXJ142   | JF978016 | JN046546 | JF943673 | JF955736 |



|                |             |                |                              |          |          |          |          |          |
|----------------|-------------|----------------|------------------------------|----------|----------|----------|----------|----------|
| Eudicotyledons | Primulaceae | <i>Primula</i> | <i>Primula munroi</i>        | GXJ143   | JF978015 | JN046545 | JF943672 | JF955735 |
| Eudicotyledons | Primulaceae | <i>Primula</i> | <i>Primula munroi</i>        | GXJ144   | JF978014 | JN046544 | JF943671 | JF955734 |
| Eudicotyledons | Primulaceae | <i>Primula</i> | <i>Primula moupinensis</i>   | GXJ263   | JF978008 | JN046538 | JF943665 | JF955728 |
| Eudicotyledons | Primulaceae | <i>Primula</i> | <i>Primula moupinensis</i>   | GXJ262   | JF978009 | JN046539 | JF943666 | JF955729 |
| Eudicotyledons | Primulaceae | <i>Primula</i> | <i>Primula moupinensis</i>   | GXJ261   | JF978010 | JN046540 | JF943667 | JF955730 |
| Eudicotyledons | Primulaceae | <i>Primula</i> | <i>Primula moupinensis</i>   | GXJ260   | JF978011 | JN046541 | JF943668 | JF955731 |
| Eudicotyledons | Primulaceae | <i>Primula</i> | <i>Primula moupinensis</i>   | GXJ259   | JF978012 | JN046542 | JF943669 | JF955732 |
| Eudicotyledons | Primulaceae | <i>Primula</i> | <i>Primula membranifolia</i> | GXJ141-1 | JF978007 | JN046537 | JF943664 | JF955727 |
| Eudicotyledons | Primulaceae | <i>Primula</i> | <i>Primula membranifolia</i> | GXJ141-2 | JF978006 | JN046536 | JF943663 | JF955726 |
| Eudicotyledons | Primulaceae | <i>Primula</i> | <i>Primula melanops</i>      | GXJ118-2 | JF978004 | JN046534 | JF943661 | JF955724 |
| Eudicotyledons | Primulaceae | <i>Primula</i> | <i>Primula melanops</i>      | GXJ118-1 | JF978005 | JN046535 | JF943662 | JF955725 |
| Eudicotyledons | Primulaceae | <i>Primula</i> | <i>Primula malvacea</i>      | GXJ221   | JF978000 | JN046530 | JF943657 | JF955720 |
| Eudicotyledons | Primulaceae | <i>Primula</i> | <i>Primula malvacea</i>      | GXJ197   | JF978002 | JN046532 | JF943659 | JF955722 |
| Eudicotyledons | Primulaceae | <i>Primula</i> | <i>Primula malvacea</i>      | GXJ196   | JF978003 | JN046533 | JF943660 | JF955723 |
| Eudicotyledons | Primulaceae | <i>Primula</i> | <i>Primula malvacea</i>      | GXJ198   | JF978001 | JN046531 | JF943658 | JF955721 |
| Eudicotyledons | Primulaceae | <i>Primula</i> | <i>Primula kialensis</i>     | GXJ258   | JF977997 | JN046528 | JF943654 | JF955717 |
| Eudicotyledons | Primulaceae | <i>Primula</i> | <i>Primula kialensis</i>     | GXJ257   | JF977998 | JN046529 | JF943655 | JF955718 |
| Eudicotyledons | Primulaceae | <i>Primula</i> | <i>Primula heucherifolia</i> | GXJ205-2 | JF977995 | JN046526 | JF943652 | JF955715 |
| Eudicotyledons | Primulaceae | <i>Primula</i> | <i>Primula heucherifolia</i> | GXJ205-1 | JF977996 | JN046527 | JF943653 | JF955716 |
| Eudicotyledons | Primulaceae | <i>Primula</i> | <i>Primula gemmifera</i>     | GXJ252   | JF977994 | JN046525 | JF943651 | JF955714 |
| Eudicotyledons | Primulaceae | <i>Primula</i> | <i>Primula gemmifera</i>     | GXJ254   | JF977993 | JN046523 | JF943649 | JF955712 |
| Eudicotyledons | Primulaceae | <i>Primula</i> | <i>Primula gemmifera</i>     | GXJ255   | JF977992 | JN046522 | JF943648 | JF955711 |
| Eudicotyledons | Primulaceae | <i>Primula</i> | <i>Primula fasciculata</i>   | GXJ250   | JF977990 | JN046520 | JF943646 | JF955709 |
| Eudicotyledons | Primulaceae | <i>Primula</i> | <i>Primula fasciculata</i>   | GXJ251   | JF977989 | JN046519 | JF943645 | JF955708 |
| Eudicotyledons | Primulaceae | <i>Primula</i> | <i>Primula fasciculata</i>   | GXJ249   | JF977991 | JN046521 | JF943647 | JF955710 |
| Eudicotyledons | Primulaceae | <i>Primula</i> | <i>Primula faberi</i>        | GXJ275   | JF977987 | JN046517 | JF943643 | JF955706 |
| Eudicotyledons | Primulaceae | <i>Primula</i> | <i>Primula faberi</i>        | GXJ100   | JF977988 | JN046518 | JF943644 | JF955707 |
| Eudicotyledons | Primulaceae | <i>Primula</i> | <i>Primula epilosa</i>       | GXJ248   | JF977984 | JN046514 | JF943640 | JF955703 |
| Eudicotyledons | Primulaceae | <i>Primula</i> | <i>Primula epilosa</i>       | GXJ247   | JF977985 | JN046515 | JF943641 | JF955704 |
| Eudicotyledons | Primulaceae | <i>Primula</i> | <i>Primula epilosa</i>       | GXJ246   | JF977986 | JN046516 | JF943642 | JF955705 |
| Eudicotyledons | Primulaceae | <i>Primula</i> | <i>Primula diantha</i>       | GXJ183   | JF977983 | JN046511 | JF943637 | JF955700 |
| Eudicotyledons | Primulaceae | <i>Primula</i> | <i>Primula diantha</i>       | GXJ185   | JF977982 | JN046510 | JF943636 | JF955699 |
| Eudicotyledons | Primulaceae | <i>Primula</i> | <i>Primula diantha</i>       | GXJ278   | JF977981 | JN046509 | JF943635 | JF955698 |
| Eudicotyledons | Primulaceae | <i>Primula</i> | <i>Primula diantha</i>       | GXJ279   | JF977980 | JN046508 | JF943634 | JF955697 |
| Eudicotyledons | Primulaceae | <i>Primula</i> | <i>Primula denticulata</i>   | GXJ189   | JF977979 | JN046507 | JF943633 | JF955696 |
| Eudicotyledons | Primulaceae | <i>Primula</i> | <i>Primula denticulata</i>   | GXJ193   | JF977976 | JN046504 | JF943630 | JF955693 |
| Eudicotyledons | Primulaceae | <i>Primula</i> | <i>Primula denticulata</i>   | GXJ192   | JF977977 | JN046505 | JF943631 | JF955694 |
| Eudicotyledons | Primulaceae | <i>Primula</i> | <i>Primula denticulata</i>   | GXJ190   | JF977978 | JN046506 | JF943632 | JF955695 |
| Eudicotyledons | Primulaceae | <i>Primula</i> | <i>Primula deflexa</i>       | GXJ140   | JF977972 | JN046500 | JF943626 | JF955689 |
| Eudicotyledons | Primulaceae | <i>Primula</i> | <i>Primula deflexa</i>       | GXJ137   | JF977975 | JN046503 | JF943629 | JF955692 |

|                |             |                |                                 |        |          |          |          |          |
|----------------|-------------|----------------|---------------------------------|--------|----------|----------|----------|----------|
| Eudicotyledons | Primulaceae | <i>Primula</i> | <i>Primula deflexa</i>          | GXJ138 | JF977974 | JN046502 | JF943628 | JF955691 |
| Eudicotyledons | Primulaceae | <i>Primula</i> | <i>Primula deflexa</i>          | GXJ139 | JF977973 | JN046501 | JF943627 | JF955690 |
| Eudicotyledons | Primulaceae | <i>Primula</i> | <i>Primula chionantha</i>       | GXJ162 | JF977968 | JN046496 | JF943622 | JF955685 |
| Eudicotyledons | Primulaceae | <i>Primula</i> | <i>Primula chionantha</i>       | GXJ160 | JF977970 | JN046498 | JF943624 | JF955687 |
| Eudicotyledons | Primulaceae | <i>Primula</i> | <i>Primula chionantha</i>       | GXJ161 | JF977969 | JN046497 | JF943623 | JF955686 |
| Eudicotyledons | Primulaceae | <i>Primula</i> | <i>Primula chionantha</i>       | GXJ163 | JF977967 | JN046495 | JF943621 | JF955684 |
| Eudicotyledons | Primulaceae | <i>Primula</i> | <i>Primula chapaensis</i>       | GXJ211 | JF977965 | JN046493 | JF943619 | JF955682 |
| Eudicotyledons | Primulaceae | <i>Primula</i> | <i>Primula chapaensis</i>       | GXJ210 | JF977966 | JN046494 | JF943620 | JF955683 |
| Eudicotyledons | Primulaceae | <i>Primula</i> | <i>Primula calderiana</i>       | GXJ244 | JF977960 | JN046488 | JF943614 | JF955677 |
| Eudicotyledons | Primulaceae | <i>Primula</i> | <i>Primula calderiana</i>       | GXJ281 | JF977958 | JN046486 | JF943612 | JF955675 |
| Eudicotyledons | Primulaceae | <i>Primula</i> | <i>Primula calderiana</i>       | GXJ245 | JF977959 | JN046487 | JF943613 | JF955676 |
| Eudicotyledons | Primulaceae | <i>Primula</i> | <i>Primula calderiana</i>       | GXJ243 | JF977961 | JN046489 | JF943615 | JF955678 |
| Eudicotyledons | Primulaceae | <i>Primula</i> | <i>Primula boreiocalliantha</i> | GXJ179 | JF977957 | JN046485 | JF943611 | JF955674 |
| Eudicotyledons | Primulaceae | <i>Primula</i> | <i>Primula boreiocalliantha</i> | GXJ217 | JF977956 | JN046484 | JF943610 | JF955673 |
| Eudicotyledons | Primulaceae | <i>Primula</i> | <i>Primula blinii</i>           | GXJ135 | JF977952 | JN046480 | JF943606 | JF955669 |
| Eudicotyledons | Primulaceae | <i>Primula</i> | <i>Primula blinii</i>           | GXJ131 | JF977955 | JN046483 | JF943609 | JF955672 |
| Eudicotyledons | Primulaceae | <i>Primula</i> | <i>Primula blinii</i>           | GXJ133 | JF977953 | JN046481 | JF943607 | JF955670 |
| Eudicotyledons | Primulaceae | <i>Primula</i> | <i>Primula blinii</i>           | GXJ132 | JF977954 | JN046482 | JF943608 | JF955671 |
| Eudicotyledons | Primulaceae | <i>Primula</i> | <i>Primula blattariformis</i>   | GXJ220 | JF977949 | JN046477 | JF943603 | JF955666 |
| Eudicotyledons | Primulaceae | <i>Primula</i> | <i>Primula blattariformis</i>   | GXJ195 | JF977950 | JN046478 | JF943604 | JF955667 |
| Eudicotyledons | Primulaceae | <i>Primula</i> | <i>Primula blattariformis</i>   | GXJ194 | JF977951 | JN046479 | JF943605 | JF955668 |
| Eudicotyledons | Primulaceae | <i>Primula</i> | <i>Primula bellidifolia</i>     | GXJ241 | JF977947 | JN046475 | JF943601 | JF955664 |
| Eudicotyledons | Primulaceae | <i>Primula</i> | <i>Primula bellidifolia</i>     | GXJ242 | JF977946 | JN046474 | JF943600 | JF955663 |
| Eudicotyledons | Primulaceae | <i>Primula</i> | <i>Primula bellidifolia</i>     | GXJ240 | JF977948 | JN046476 | JF943602 | JF955665 |
| Eudicotyledons | Primulaceae | <i>Primula</i> | <i>Primula bella</i>            | GXJ096 | JF977944 | JN046472 | JF943598 | JF955661 |
| Eudicotyledons | Primulaceae | <i>Primula</i> | <i>Primula bella</i>            | GXJ097 | JF977943 | JN046471 | JF943597 | JF955660 |
| Eudicotyledons | Primulaceae | <i>Primula</i> | <i>Primula bella</i>            | GXJ095 | JF977945 | JN046473 | JF943599 | JF955662 |
| Eudicotyledons | Primulaceae | <i>Primula</i> | <i>Primula aromatica</i>        | GXJ272 | JF977942 | JN046470 | JF943596 | JF955659 |
| Eudicotyledons | Primulaceae | <i>Primula</i> | <i>Primula aromatica</i>        | GXJ273 | JF977941 | JN046469 | JF943595 | JF955658 |
| Eudicotyledons | Primulaceae | <i>Primula</i> | <i>Primula amethystina</i>      | GXJ121 | JF977940 | JN046468 | JF943594 | JF955657 |
| Eudicotyledons | Primulaceae | <i>Primula</i> | <i>Primula amethystina</i>      | GXJ120 | JF977938 | JN046466 | JF943592 | JF955655 |
| Eudicotyledons | Primulaceae | <i>Primula</i> | <i>Primula amethystina</i>      | GXJ119 | JF977939 | JN046467 | JF943593 | JF955656 |
| Eudicotyledons | Primulaceae | <i>Primula</i> | <i>Primula alpicola</i>         | GXJ232 | JF977937 | JN046465 | JF943591 | JF955654 |
| Eudicotyledons | Primulaceae | <i>Primula</i> | <i>Primula alpicola</i>         | GXJ233 | JF977936 | JN046464 | JF943590 | JF955653 |
| Eudicotyledons | Primulaceae | <i>Primula</i> | <i>Primula alpicola</i>         | GXJ236 | JF977933 | JN046461 | JF943587 | JF955650 |
| Eudicotyledons | Primulaceae | <i>Primula</i> | <i>Primula alpicola</i>         | GXJ234 | JF977935 | JN046463 | JF943589 | JF955652 |
| Eudicotyledons | Primulaceae | <i>Primula</i> | <i>Primula alpicola</i>         | GXJ235 | JF977934 | JN046462 | JF943588 | JF955651 |
| Eudicotyledons | Primulaceae | <i>Primula</i> | <i>Primula agleniana</i>        | GXJ229 | JF977932 | JN046460 | JF943586 | JF955649 |
| Eudicotyledons | Primulaceae | <i>Primula</i> | <i>Primula agleniana</i>        | GXJ230 | JF977931 | JN046459 | JF943585 | JF955648 |
| Eudicotyledons | Primulaceae | <i>Primula</i> | <i>Primula agleniana</i>        | GXJ231 | JF977930 | JN046458 | JF943584 | JF955647 |

|                |               |                     |                                     |                    |          |          |          |          |
|----------------|---------------|---------------------|-------------------------------------|--------------------|----------|----------|----------|----------|
| Eudicotyledons | Apiaceae      | <i>Pleurospermu</i> | <i>Pleurospermum uralense</i>       | NASLQX033          | JF977837 | JN046395 | JF943471 | JF955563 |
| Eudicotyledons | Apiaceae      | <i>Pleurospermu</i> | <i>Pleurospermum uralense</i>       | NASLQX032          | JF977838 | JN046396 | JF943472 | JF955564 |
| Eudicotyledons | Apiaceae      | <i>Pleurospermu</i> | <i>Pleurospermum uralense</i>       | NASLQX031          | JF977839 | JN046397 | JF943473 | JF955565 |
| Eudicotyledons | Apiaceae      | <i>Pleurospermu</i> | <i>Pleurospermum uralense</i>       | NASLQX037          | JF977836 | JN046394 | JF943470 | JF955562 |
| Eudicotyledons | Apiaceae      | <i>Pleurospermu</i> | <i>Pleurospermum uralense</i>       | NASLQX039          | JF977835 | JN046393 | JF943469 | JF955561 |
| Eudicotyledons | Apiaceae      | <i>Pleurospermu</i> | <i>Pleurospermum giraldii</i>       | NASLQX051          | JF977834 | JN046392 | JF943468 | JF955560 |
| Eudicotyledons | Apiaceae      | <i>Pleurospermu</i> | <i>Pleurospermum giraldii</i>       | NASLQX053          | JF977832 | JN046390 | JF943466 | JF955558 |
| Eudicotyledons | Apiaceae      | <i>Pleurospermu</i> | <i>Pleurospermum giraldii</i>       | NASLQX052          | JF977833 | JN046391 | JF943467 | JF955559 |
| Eudicotyledons | Apiaceae      | <i>Pleurospermu</i> | <i>Pleurospermum giraldii</i>       | NASLQX054          | JF977831 | JN046389 | JF943465 | JF955557 |
| Eudicotyledons | Apiaceae      | <i>Pleurospermu</i> | <i>Pleurospermum cristatum</i>      | NASLQX050          | JF977827 | JN046386 | JF943461 | JF955556 |
| Eudicotyledons | Apiaceae      | <i>Pleurospermu</i> | <i>Pleurospermum cristatum</i>      | NASLQX059          | JF977826 | JN046385 | JF943460 | JF955555 |
| Eudicotyledons | Apiaceae      | <i>Peucedanum</i>   | <i>Peucedanum wawrae</i>            | NASLQX011          | JF977825 | JN046238 | JF943307 | JF955414 |
| Eudicotyledons | Apiaceae      | <i>Peucedanum</i>   | <i>Peucedanum wawrae</i>            | NASLQX013          | JF977823 | JN046236 | JF943305 | JF955412 |
| Eudicotyledons | Apiaceae      | <i>Peucedanum</i>   | <i>Peucedanum wawrae</i>            | NASLQX012          | JF977824 | JN046237 | JF943306 | JF955413 |
| Eudicotyledons | Apiaceae      | <i>Peucedanum</i>   | <i>Peucedanum medicum</i>           | NASLQX010          | JF977813 | JN046227 | JF943295 | JF955402 |
| Eudicotyledons | Apiaceae      | <i>Peucedanum</i>   | <i>Peucedanum medicum</i>           | NASLQX061          | JF977812 | JN046226 | JF943294 | JF955401 |
| Eudicotyledons | Apiaceae      | <i>Peucedanum</i>   | <i>Peucedanum medicum</i>           | NASLQX062          | JF977811 | JN046225 | JF943293 | JF955400 |
| Eudicotyledons | Apiaceae      | <i>Peucedanum</i>   | <i>Peucedanum medicum</i>           | NASLQX003          | JF977815 | JN046228 | JF943297 | JF955404 |
| Eudicotyledons | Apiaceae      | <i>Peucedanum</i>   | <i>Peucedanum ledebourielloides</i> | NASLQX049          | JF977808 | JN046222 | JF943290 | JF955397 |
| Eudicotyledons | Apiaceae      | <i>Peucedanum</i>   | <i>Peucedanum ledebourielloides</i> | NASLQX015          | JF977809 | JN046223 | JF943291 | JF955398 |
| Eudicotyledons | Apiaceae      | <i>Peucedanum</i>   | <i>Peucedanum ledebourielloides</i> | NASLQX014          | JF977810 | JN046224 | JF943292 | JF955399 |
| Eudicotyledons | Apiaceae      | <i>Peucedanum</i>   | <i>Peucedanum japonicum</i>         | NASLQX006          | JF977806 | JN046220 | JF943288 | JF955395 |
| Eudicotyledons | Apiaceae      | <i>Peucedanum</i>   | <i>Peucedanum japonicum</i>         | NASLQX007          | JF977805 | JN046219 | JF943287 | JF955394 |
| Eudicotyledons | Apiaceae      | <i>Peucedanum</i>   | <i>Peucedanum japonicum</i>         | NASLQX005          | JF977807 | JN046221 | JF943289 | JF955396 |
| Eudicotyledons | Apiaceae      | <i>Peucedanum</i>   | <i>Peucedanum caespitosum</i>       | NASLQX065          | JF977802 | JN046216 | JF943284 | JF955391 |
| Eudicotyledons | Apiaceae      | <i>Peucedanum</i>   | <i>Peucedanum caespitosum</i>       | NASLQX035          | JF977803 | JN046217 | JF943285 | JF955392 |
| Eudicotyledons | Apiaceae      | <i>Peucedanum</i>   | <i>Peucedanum caespitosum</i>       | NASLQX034          | JF977804 | JN046218 | JF943286 | JF955393 |
| Eudicotyledons | Apiaceae      | <i>Peucedanum</i>   | <i>Peucedanum ampliatum</i>         | NASLQX020          | JF977801 | JN046215 | JF943283 | JF955390 |
| Eudicotyledons | Apiaceae      | <i>Peucedanum</i>   | <i>Peucedanum ampliatum</i>         | NASLQX021          | JF977800 | JN046214 | JF943282 | JF955389 |
| Eudicotyledons | Apiaceae      | <i>Peucedanum</i>   | <i>Peucedanum ampliatum</i>         | NASLQX022          | JF977799 | JN046213 | JF943281 | JF955388 |
| Eudicotyledons | Orobanchaceae | <i>Pedicularis</i>  | <i>Pedicularis vialii</i>           | P121-2-HW-LIDZ1275 | JF977782 | JN046195 | JF943265 | JF955371 |
| Eudicotyledons | Orobanchaceae | <i>Pedicularis</i>  | <i>Pedicularis vialii</i>           | P121-1-HW-HW10191  | JF977783 | JN046196 | JF943266 | JF955372 |
| Eudicotyledons | Orobanchaceae | <i>Pedicularis</i>  | <i>Pedicularis variegata</i>        | P120-1-HW-07ML101B | JF977781 | JN046194 | JF943264 | JF955370 |
| Eudicotyledons | Orobanchaceae | <i>Pedicularis</i>  | <i>Pedicularis variegata</i>        | P120-2-HW-07ML101A | JF977780 | JN046193 | JF943263 | JF955369 |
| Eudicotyledons | Orobanchaceae | <i>Pedicularis</i>  | <i>Pedicularis urceolata</i>        | P119-3-HW-HW10294  | JF977776 | JN046189 | JF943259 | JF955365 |
| Eudicotyledons | Orobanchaceae | <i>Pedicularis</i>  | <i>Pedicularis urceolata</i>        | P119-HW-LIDZ1211   | JF977778 | JN046191 | JF943261 | JF955367 |
| Eudicotyledons | Orobanchaceae | <i>Pedicularis</i>  | <i>Pedicularis urceolata</i>        | P119-5-HW-LIDZ1115 | JF977779 | JN046192 | JF943262 | JF955368 |

|                |               |                    |                                  |                     |          |          |          |          |
|----------------|---------------|--------------------|----------------------------------|---------------------|----------|----------|----------|----------|
| Eudicotyledons | Orobanchaceae | <i>Pedicularis</i> | <i>Pedicularis urceolata</i>     | P119-2-HW-HW10276   | JF977777 | JN046190 | JF943260 | JF955366 |
| Eudicotyledons | Orobanchaceae | <i>Pedicularis</i> | <i>Pedicularis urceolata</i>     | P119-4-HW-HW10315   | JF977775 | JN046188 | JF943258 | JF955364 |
| Eudicotyledons | Orobanchaceae | <i>Pedicularis</i> | <i>Pedicularis umbelliformis</i> | P178-1-HW-HW10134   | JF977774 | JN046187 | JF943257 | JF955363 |
| Eudicotyledons | Orobanchaceae | <i>Pedicularis</i> | <i>Pedicularis umbelliformis</i> | P178-2-HW-HW10176   | JF977773 | JN046186 | JF943256 | JF955362 |
| Eudicotyledons | Orobanchaceae | <i>Pedicularis</i> | <i>Pedicularis tsekouensis</i>   | P187-1-HW-HW10167A  | JF977772 | JN046185 | JF943255 | JF955361 |
| Eudicotyledons | Orobanchaceae | <i>Pedicularis</i> | <i>Pedicularis tsekouensis</i>   | P187-3-HW-HW10167C  | JF977770 | JN046183 | JF943253 | JF955359 |
| Eudicotyledons | Orobanchaceae | <i>Pedicularis</i> | <i>Pedicularis tsekouensis</i>   | P187-2-HW-HW10167B  | JF977771 | JN046184 | JF943254 | JF955360 |
| Eudicotyledons | Orobanchaceae | <i>Pedicularis</i> | <i>Pedicularis tricolor</i>      | P118-3-HW-LIDZ1227  | JF977768 | JN046181 | JF943251 | JF955357 |
| Eudicotyledons | Orobanchaceae | <i>Pedicularis</i> | <i>Pedicularis tricolor</i>      | P118-HW-YWB069      | JF977767 | JN046180 | JF943250 | JF955356 |
| Eudicotyledons | Orobanchaceae | <i>Pedicularis</i> | <i>Pedicularis tricolor</i>      | P118-2-HW-HW10149   | JF977769 | JN046182 | JF943252 | JF955358 |
| Eudicotyledons | Orobanchaceae | <i>Pedicularis</i> | <i>Pedicularis trichoglossa</i>  | P116-2-HW-HW10256   | JF977766 | JN046179 | JF943249 | JF955355 |
| Eudicotyledons | Orobanchaceae | <i>Pedicularis</i> | <i>Pedicularis trichoglossa</i>  | P116-HW-081468      | JF977765 | JN046178 | JF943248 | JF955354 |
| Eudicotyledons | Orobanchaceae | <i>Pedicularis</i> | <i>Pedicularis tongolensis</i>   | P115-4-HW-HW10229   | JF977763 | JN046176 | JF943246 | JF955352 |
| Eudicotyledons | Orobanchaceae | <i>Pedicularis</i> | <i>Pedicularis tongolensis</i>   | P115-5-HW-HW10308   | JF977762 | JN046175 | JF943245 | JF955351 |
| Eudicotyledons | Orobanchaceae | <i>Pedicularis</i> | <i>Pedicularis tongolensis</i>   | P115-2-HW-HW10139   | JF977764 | JN046177 | JF943247 | JF955353 |
| Eudicotyledons | Orobanchaceae | <i>Pedicularis</i> | <i>Pedicularis tongolensis</i>   | P115-HW-LIDZ1251    | JF977760 | JN046173 | JF943243 | JF955349 |
| Eudicotyledons | Orobanchaceae | <i>Pedicularis</i> | <i>Pedicularis tongolensis</i>   | P115-6-HW-LWL096    | JF977761 | JN046174 | JF943244 | JF955350 |
| Eudicotyledons | Orobanchaceae | <i>Pedicularis</i> | <i>Pedicularis tibetica</i>      | P114-HW-LIDZ1085    | JF977756 | JN046169 | JF943239 | JF955345 |
| Eudicotyledons | Orobanchaceae | <i>Pedicularis</i> | <i>Pedicularis tibetica</i>      | P114-4-HW-LIDZ1155  | JF977757 | JN046170 | JF943240 | JF955346 |
| Eudicotyledons | Orobanchaceae | <i>Pedicularis</i> | <i>Pedicularis tibetica</i>      | P114-3-HW-HW10333   | JF977758 | JN046171 | JF943241 | JF955347 |
| Eudicotyledons | Orobanchaceae | <i>Pedicularis</i> | <i>Pedicularis tibetica</i>      | P114-2-HW-HW10309   | JF977759 | JN046172 | JF943242 | JF955348 |
| Eudicotyledons | Orobanchaceae | <i>Pedicularis</i> | <i>Pedicularis thamnophila</i>   | P113-4-HW-LIDZ1019  | JF977752 | JN046165 | JF943235 | JF955341 |
| Eudicotyledons | Orobanchaceae | <i>Pedicularis</i> | <i>Pedicularis thamnophila</i>   | P113-2-HW-LIDZ1014  | JF977754 | JN046167 | JF943237 | JF955343 |
| Eudicotyledons | Orobanchaceae | <i>Pedicularis</i> | <i>Pedicularis thamnophila</i>   | P113-3-HW-LIDZ1016  | JF977753 | JN046166 | JF943236 | JF955342 |
| Eudicotyledons | Orobanchaceae | <i>Pedicularis</i> | <i>Pedicularis thamnophila</i>   | P113-1-HW-LIDZ0990  | JF977755 | JN046168 | JF943238 | JF955344 |
| Eudicotyledons | Orobanchaceae | <i>Pedicularis</i> | <i>Pedicularis thamnophila</i>   | P113-5-HW-LIDZ1002  | JF977751 | JN046164 | JF943234 | JF955340 |
| Eudicotyledons | Orobanchaceae | <i>Pedicularis</i> | <i>Pedicularis tenuisecta</i>    | P112-2-HW-2004204   | JF977750 | JN046163 | JF943233 | JF955339 |
| Eudicotyledons | Orobanchaceae | <i>Pedicularis</i> | <i>Pedicularis tenuisecta</i>    | P112-3-HW-HW10160   | JF977749 | JN046162 | JF943232 | JF955338 |
| Eudicotyledons | Orobanchaceae | <i>Pedicularis</i> | <i>Pedicularis tenuisecta</i>    | P112-5-HW-LIDZ0995  | JF977748 | JN046161 | JF943231 | JF955337 |
| Eudicotyledons | Orobanchaceae | <i>Pedicularis</i> | <i>Pedicularis tachanensis</i>   | P110-4-HW-LH8484    | JF977744 | JN046158 | JF943227 | JF955334 |
| Eudicotyledons | Orobanchaceae | <i>Pedicularis</i> | <i>Pedicularis tachanensis</i>   | P110-5-HW-LIDZ1062  | JF977743 | JN046157 | JF943226 | JF955333 |
| Eudicotyledons | Orobanchaceae | <i>Pedicularis</i> | <i>Pedicularis tachanensis</i>   | P110-2-HW-HW10355   | JF977746 | JN046160 | JF943229 | JF955336 |
| Eudicotyledons | Orobanchaceae | <i>Pedicularis</i> | <i>Pedicularis tachanensis</i>   | P110-3-HW-HW10370   | JF977745 | JN046159 | JF943228 | JF955335 |
| Eudicotyledons | Orobanchaceae | <i>Pedicularis</i> | <i>Pedicularis superba</i>       | P109-4-HW-LIDZ1266  | JF977740 | JN046154 | JF943223 | JF955330 |
| Eudicotyledons | Orobanchaceae | <i>Pedicularis</i> | <i>Pedicularis superba</i>       | P109-3-HW-LIDZ1074  | JF977741 | JN046155 | JF943224 | JF955331 |
| Eudicotyledons | Orobanchaceae | <i>Pedicularis</i> | <i>Pedicularis superba</i>       | P109-5-HW-LIDZ1578  | JF977739 | JN046153 | JF943222 | JF955329 |
| Eudicotyledons | Orobanchaceae | <i>Pedicularis</i> | <i>Pedicularis superba</i>       | P109-1-HW-LIDZ1007  | JF977742 | JN046156 | JF943225 | JF955332 |
| Eudicotyledons | Orobanchaceae | <i>Pedicularis</i> | <i>Pedicularis sorbifolia</i>    | P100-2-HW-LIDZ1176C | JF977732 | JN046146 | JF943215 | JF955322 |
| Eudicotyledons | Orobanchaceae | <i>Pedicularis</i> | <i>Pedicularis sorbifolia</i>    | P100-3-HW-LIDZ1176A | JF977731 | JN046145 | JF943214 | JF955321 |
| Eudicotyledons | Orobanchaceae | <i>Pedicularis</i> | <i>Pedicularis sorbifolia</i>    | P100-1-HW-LIDZ1176B | JF977733 | JN046147 | JF943216 | JF955323 |

|                |               |                    |                                  |                    |          |          |          |          |
|----------------|---------------|--------------------|----------------------------------|--------------------|----------|----------|----------|----------|
| Eudicotyledons | Orobanchaceae | <i>Pedicularis</i> | <i>Pedicularis sikangensis</i>   | P161-3-HW-HW10332  | JF977720 | JN046134 | JF943203 | JF955311 |
| Eudicotyledons | Orobanchaceae | <i>Pedicularis</i> | <i>Pedicularis sikangensis</i>   | P161-2-HW-HW10318  | JF977721 | JN046135 | JF943204 | JF955312 |
| Eudicotyledons | Orobanchaceae | <i>Pedicularis</i> | <i>Pedicularis sikangensis</i>   | P161-1-HW-HW10262  | JF977722 | JN046136 | JF943205 | JF955313 |
| Eudicotyledons | Orobanchaceae | <i>Pedicularis</i> | <i>Pedicularis sigmoidea</i>     | P96-2-HW-HW10015   | JF977719 | JN046133 | JF943202 | JF955310 |
| Eudicotyledons | Orobanchaceae | <i>Pedicularis</i> | <i>Pedicularis sigmoidea</i>     | P96-HW-LIDZ1584    | JF977718 | JN046132 | JF943201 | JF955309 |
| Eudicotyledons | Orobanchaceae | <i>Pedicularis</i> | <i>Pedicularis salviiflora</i>   | P94-4-HW-HW10057   | JF977715 | JN046129 | JF943198 | JF955306 |
| Eudicotyledons | Orobanchaceae | <i>Pedicularis</i> | <i>Pedicularis salviiflora</i>   | P94-2-HW-YWB269    | JF977717 | JN046131 | JF943200 | JF955308 |
| Eudicotyledons | Orobanchaceae | <i>Pedicularis</i> | <i>Pedicularis salviiflora</i>   | P94-3-HW-HW10033   | JF977716 | JN046130 | JF943199 | JF955307 |
| Eudicotyledons | Orobanchaceae | <i>Pedicularis</i> | <i>Pedicularis rupicola</i>      | P93-5-HW-081277    | JF977711 | JN046125 | JF943194 | JF955302 |
| Eudicotyledons | Orobanchaceae | <i>Pedicularis</i> | <i>Pedicularis rupicola</i>      | P93-HW-08916       | JF977708 | JN046122 | JF943191 | JF955299 |
| Eudicotyledons | Orobanchaceae | <i>Pedicularis</i> | <i>Pedicularis rupicola</i>      | P93-3-HW-LIDZ1219  | JF977713 | JN046127 | JF943196 | JF955304 |
| Eudicotyledons | Orobanchaceae | <i>Pedicularis</i> | <i>Pedicularis rupicola</i>      | P93-7-HW-GLM102879 | JF977709 | JN046123 | JF943192 | JF955300 |
| Eudicotyledons | Orobanchaceae | <i>Pedicularis</i> | <i>Pedicularis rupicola</i>      | P93-4-HW-08907     | JF977712 | JN046126 | JF943195 | JF955303 |
| Eudicotyledons | Orobanchaceae | <i>Pedicularis</i> | <i>Pedicularis rupicola</i>      | P93-6-HW-HW10128   | JF977710 | JN046124 | JF943193 | JF955301 |
| Eudicotyledons | Orobanchaceae | <i>Pedicularis</i> | <i>Pedicularis rupicola</i>      | P93-2-HW-LIDZ1236  | JF977714 | JN046128 | JF943197 | JF955305 |
| Eudicotyledons | Orobanchaceae | <i>Pedicularis</i> | <i>Pedicularis roylei</i>        | P92-2-HW-HW10266   | JF977707 | JN046121 | JF943190 | JF955298 |
| Eudicotyledons | Orobanchaceae | <i>Pedicularis</i> | <i>Pedicularis roylei</i>        | P92-3-HW-HW10288   | JF977706 | JN046120 | JF943189 | JF955297 |
| Eudicotyledons | Orobanchaceae | <i>Pedicularis</i> | <i>Pedicularis rizhaoensis</i>   | P91-1-HW-LIDZ1254B | JF977705 | JN046119 | JF943188 | JF955296 |
| Eudicotyledons | Orobanchaceae | <i>Pedicularis</i> | <i>Pedicularis rizhaoensis</i>   | P91-2-HW-LIDZ1254A | JF977704 | JN046118 | JF943187 | JF955295 |
| Eudicotyledons | Orobanchaceae | <i>Pedicularis</i> | <i>Pedicularis rigida</i>        | P90-3-HW-LIDZ0950  | JF977701 | JN046115 | JF943184 | JF955292 |
| Eudicotyledons | Orobanchaceae | <i>Pedicularis</i> | <i>Pedicularis rigida</i>        | P90-4-HW-HW10040   | JF977700 | JN046114 | JF943183 | JF955291 |
| Eudicotyledons | Orobanchaceae | <i>Pedicularis</i> | <i>Pedicularis rigida</i>        | P90-2-HW-LIDZ0947  | JF977702 | JN046116 | JF943185 | JF955293 |
| Eudicotyledons | Orobanchaceae | <i>Pedicularis</i> | <i>Pedicularis rigida</i>        | P90-1-HW-05123     | JF977703 | JN046117 | JF943186 | JF955294 |
| Eudicotyledons | Orobanchaceae | <i>Pedicularis</i> | <i>Pedicularis rhynchodonta</i>  | P179-2-HW-HW10283  | JF977698 | JN046112 | JF943181 | JF955289 |
| Eudicotyledons | Orobanchaceae | <i>Pedicularis</i> | <i>Pedicularis rhynchodonta</i>  | P179-1-HW-HW10261  | JF977699 | JN046113 | JF943182 | JF955290 |
| Eudicotyledons | Orobanchaceae | <i>Pedicularis</i> | <i>Pedicularis rhynchodonta</i>  | P179-5-HW-HW10272  | JF977695 | JN046109 | JF943178 | JF955286 |
| Eudicotyledons | Orobanchaceae | <i>Pedicularis</i> | <i>Pedicularis rhynchodonta</i>  | P179-4-HW-HW10321  | JF977696 | JN046110 | JF943179 | JF955287 |
| Eudicotyledons | Orobanchaceae | <i>Pedicularis</i> | <i>Pedicularis rhynchodonta</i>  | P179-3-HW-HW10296  | JF977697 | JN046111 | JF943180 | JF955288 |
| Eudicotyledons | Orobanchaceae | <i>Pedicularis</i> | <i>Pedicularis rhodotricha</i>   | P80-2-HW-08846     | JF977694 | JN046108 | JF943177 | JF955285 |
| Eudicotyledons | Orobanchaceae | <i>Pedicularis</i> | <i>Pedicularis rhodotricha</i>   | P80-5-HW-LIDZ1238  | JF977691 | JN046105 | JF943174 | JF955282 |
| Eudicotyledons | Orobanchaceae | <i>Pedicularis</i> | <i>Pedicularis rhodotricha</i>   | P80-HW-LIDZ1117    | JF977690 | JN046104 | JF943173 | JF955281 |
| Eudicotyledons | Orobanchaceae | <i>Pedicularis</i> | <i>Pedicularis rhodotricha</i>   | P80-4-HW-LIDZ1135  | JF977692 | JN046106 | JF943175 | JF955283 |
| Eudicotyledons | Orobanchaceae | <i>Pedicularis</i> | <i>Pedicularis rhodotricha</i>   | P80-3-HW-03052     | JF977693 | JN046107 | JF943176 | JF955284 |
| Eudicotyledons | Orobanchaceae | <i>Pedicularis</i> | <i>Pedicularis rhinanthoides</i> | P79-1-HW-2004249   | JF977689 | JN046103 | JF943172 | JF955280 |
| Eudicotyledons | Orobanchaceae | <i>Pedicularis</i> | <i>Pedicularis rhinanthoides</i> | P79-2-HW-08915     | JF977688 | JN046102 | JF943171 | JF955279 |
| Eudicotyledons | Orobanchaceae | <i>Pedicularis</i> | <i>Pedicularis rhinanthoides</i> | P79-3-HW-08938     | JF977687 | JN046101 | JF943170 | JF955278 |
| Eudicotyledons | Orobanchaceae | <i>Pedicularis</i> | <i>Pedicularis rhinanthoides</i> | P79-5-HW-LIDZ1158  | JF977685 | JN046099 | JF943168 | JF955276 |
| Eudicotyledons | Orobanchaceae | <i>Pedicularis</i> | <i>Pedicularis rhinanthoides</i> | P79-4-HW-LIDZ1215  | JF977686 | JN046100 | JF943169 | JF955277 |
| Eudicotyledons | Orobanchaceae | <i>Pedicularis</i> | <i>Pedicularis rex</i>           | P78-5-HW-LIDZ1193  | JF977680 | JN046094 | JF943163 | JF955271 |
| Eudicotyledons | Orobanchaceae | <i>Pedicularis</i> | <i>Pedicularis rex</i>           | P78-1-HW-LIDZ0962  | JF977684 | JN046098 | JF943167 | JF955275 |

|                |               |                    |                                         |                     |          |          |          |          |
|----------------|---------------|--------------------|-----------------------------------------|---------------------|----------|----------|----------|----------|
| Eudicotyledons | Orobanchaceae | <i>Pedicularis</i> | <i>Pedicularis rex</i>                  | P78-3-HW-LIDZ0983   | JF977682 | JN046096 | JF943165 | JF955273 |
| Eudicotyledons | Orobanchaceae | <i>Pedicularis</i> | <i>Pedicularis rex</i>                  | P78-4-HW-LIDZ1011   | JF977681 | JN046095 | JF943164 | JF955272 |
| Eudicotyledons | Orobanchaceae | <i>Pedicularis</i> | <i>Pedicularis rex</i>                  | P78-2-HW-LIDZ0979   | JF977683 | JN046097 | JF943166 | JF955274 |
| Eudicotyledons | Orobanchaceae | <i>Pedicularis</i> | <i>Pedicularis resupinata</i>           | P77-2-HW-HJ019      | JF977679 | JN046093 | JF943162 | JF955270 |
| Eudicotyledons | Orobanchaceae | <i>Pedicularis</i> | <i>Pedicularis resupinata</i>           | P77-HW-LIDZ544      | JF977677 | JN046091 | JF943160 | JF955268 |
| Eudicotyledons | Orobanchaceae | <i>Pedicularis</i> | <i>Pedicularis resupinata</i>           | P77-4-HW-LIDZ519    | JF977678 | JN046092 | JF943161 | JF955269 |
| Eudicotyledons | Orobanchaceae | <i>Pedicularis</i> | <i>Pedicularis pseudoversicolor</i>     | P183-2-HW-HW10124   | JF977675 | JN046089 | JF943158 | JF955266 |
| Eudicotyledons | Orobanchaceae | <i>Pedicularis</i> | <i>Pedicularis pseudoversicolor</i>     | P183-1-HW-HW10099   | JF977676 | JN046090 | JF943159 | JF955267 |
| Eudicotyledons | Orobanchaceae | <i>Pedicularis</i> | <i>Pedicularis pseudoversicolor</i>     | P183-3-HW-HW10165   | JF977674 | JN046088 | JF943157 | JF955265 |
| Eudicotyledons | Orobanchaceae | <i>Pedicularis</i> | <i>Pedicularis pseudomelampyriflora</i> | P74-4-HW-LIDZ0993   | JF977671 | JN046085 | JF943154 | JF955262 |
| Eudicotyledons | Orobanchaceae | <i>Pedicularis</i> | <i>Pedicularis pseudomelampyriflora</i> | P74-5-HW-LIDZ1000   | JF977670 | JN046084 | JF943153 | JF955261 |
| Eudicotyledons | Orobanchaceae | <i>Pedicularis</i> | <i>Pedicularis pseudomelampyriflora</i> | P74-HW-08873        | JF977669 | JN046083 | JF943152 | JF955260 |
| Eudicotyledons | Orobanchaceae | <i>Pedicularis</i> | <i>Pedicularis pseudomelampyriflora</i> | P74-3-HW-HW10213    | JF977672 | JN046086 | JF943155 | JF955263 |
| Eudicotyledons | Orobanchaceae | <i>Pedicularis</i> | <i>Pedicularis pseudomelampyriflora</i> | P74-2-HW-LIDZ1292   | JF977673 | JN046087 | JF943156 | JF955264 |
| Eudicotyledons | Orobanchaceae | <i>Pedicularis</i> | <i>Pedicularis przewalskii</i>          | P73-3-HW-HW10265    | JF977667 | JN046081 | JF943150 | JF955258 |
| Eudicotyledons | Orobanchaceae | <i>Pedicularis</i> | <i>Pedicularis przewalskii</i>          | P73-2-HW-HW10198    | JF977668 | JN046082 | JF943151 | JF955259 |
| Eudicotyledons | Orobanchaceae | <i>Pedicularis</i> | <i>Pedicularis przewalskii</i>          | P73-HW-LIDZ1235     | JF977666 | JN046080 | JF943149 | JF955257 |
| Eudicotyledons | Orobanchaceae | <i>Pedicularis</i> | <i>Pedicularis oxycarpa</i>             | P71-3-HW-Yang002    | JF977663 | JN046077 | JF943146 | JF955254 |
| Eudicotyledons | Orobanchaceae | <i>Pedicularis</i> | <i>Pedicularis oxycarpa</i>             | P71-2-HW-LIDZ1038   | JF977664 | JN046078 | JF943147 | JF955255 |
| Eudicotyledons | Orobanchaceae | <i>Pedicularis</i> | <i>Pedicularis oxycarpa</i>             | P71-1-HW-LIDZ1299   | JF977665 | JN046079 | JF943148 | JF955256 |
| Eudicotyledons | Orobanchaceae | <i>Pedicularis</i> | <i>Pedicularis oxycarpa</i>             | P71-6-HW-HW10372    | JF977660 | JN046074 | JF943143 | JF955252 |
| Eudicotyledons | Orobanchaceae | <i>Pedicularis</i> | <i>Pedicularis oxycarpa</i>             | P71-4-HW-LIDZ1536   | JF977662 | JN046076 | JF943145 | JF955253 |
| Eudicotyledons | Orobanchaceae | <i>Pedicularis</i> | <i>Pedicularis orthocoryne</i>          | P130-2-HW-GLM102994 | JF977659 | JN046073 | JF943142 | JF955251 |
| Eudicotyledons | Orobanchaceae | <i>Pedicularis</i> | <i>Pedicularis orthocoryne</i>          | P130-HW-YWB506      | JF977658 | JN046072 | JF943141 | JF955250 |
| Eudicotyledons | Orobanchaceae | <i>Pedicularis</i> | <i>Pedicularis oederi</i>               | P69-3-HW-GLM103003  | JF977656 | JN046070 | JF943139 | JF955248 |
| Eudicotyledons | Orobanchaceae | <i>Pedicularis</i> | <i>Pedicularis oederi</i>               | P69-HW-03053        | JF977654 | JN046068 | JF943137 | JF955246 |
| Eudicotyledons | Orobanchaceae | <i>Pedicularis</i> | <i>Pedicularis oederi</i>               | P69-2-HW-GLM102876  | JF977657 | JN046071 | JF943140 | JF955249 |
| Eudicotyledons | Orobanchaceae | <i>Pedicularis</i> | <i>Pedicularis oederi</i>               | P69-4-HW-GLM103015  | JF977655 | JN046069 | JF943138 | JF955247 |
| Eudicotyledons | Orobanchaceae | <i>Pedicularis</i> | <i>Pedicularis nigra</i>                | P68-2-HW-XCL159     | JF977653 | JN046067 | JF943136 | JF955245 |
| Eudicotyledons | Orobanchaceae | <i>Pedicularis</i> | <i>Pedicularis nigra</i>                | P68-HW-LIDZ1331     | JF977652 | JN046066 | JF943135 | JF955244 |
| Eudicotyledons | Orobanchaceae | <i>Pedicularis</i> | <i>Pedicularis mussozii</i>             | P65-3-HW-HW10310    | JF977650 | JN046064 | JF943133 | JF955242 |
| Eudicotyledons | Orobanchaceae | <i>Pedicularis</i> | <i>Pedicularis mussozii</i>             | P65-HW-LIDZ1088     | JF977647 | JN046061 | JF943130 | JF955239 |

|                |               |                    |                                 |                     |          |          |          |          |
|----------------|---------------|--------------------|---------------------------------|---------------------|----------|----------|----------|----------|
| Eudicotyledons | Orobanchaceae | <i>Pedicularis</i> | <i>Pedicularis musсотii</i>     | P65-4-HW-HW10328    | JF977649 | JN046063 | JF943132 | JF955241 |
| Eudicotyledons | Orobanchaceae | <i>Pedicularis</i> | <i>Pedicularis musсотii</i>     | P65-5-HW-LIDZ1134   | JF977648 | JN046062 | JF943131 | JF955240 |
| Eudicotyledons | Orobanchaceae | <i>Pedicularis</i> | <i>Pedicularis musсотii</i>     | P65-2-HW-HW10295    | JF977651 | JN046065 | JF943134 | JF955243 |
| Eudicotyledons | Orobanchaceae | <i>Pedicularis</i> | <i>Pedicularis megalantha</i>   | P61-2-HW-081122     | JF977646 | JN046060 | JF943129 | JF955238 |
| Eudicotyledons | Orobanchaceae | <i>Pedicularis</i> | <i>Pedicularis megalantha</i>   | P61-HW-081191       | JF977645 | JN046059 | JF943128 | JF955237 |
| Eudicotyledons | Orobanchaceae | <i>Pedicularis</i> | <i>Pedicularis maxonii</i>      | P60-2-HW-HP9542     | JF977643 | JN046057 | JF943126 | JF955235 |
| Eudicotyledons | Orobanchaceae | <i>Pedicularis</i> | <i>Pedicularis maxonii</i>      | P60-1-HW-LIDZ1579   | JF977644 | JN046058 | JF943127 | JF955236 |
| Eudicotyledons | Orobanchaceae | <i>Pedicularis</i> | <i>Pedicularis macrosiphon</i>  | P165-2-HW-GLM092443 | JF977642 | JN046056 | JF943125 | JF955234 |
| Eudicotyledons | Orobanchaceae | <i>Pedicularis</i> | <i>Pedicularis macrosiphon</i>  | P165-HW-GLM07486    | JF977640 | JN046054 | JF943123 | JF955232 |
| Eudicotyledons | Orobanchaceae | <i>Pedicularis</i> | <i>Pedicularis macrosiphon</i>  | P165-3-HW-GLM102963 | JF977641 | JN046055 | JF943124 | JF955233 |
| Eudicotyledons | Orobanchaceae | <i>Pedicularis</i> | <i>Pedicularis macrorhyncha</i> | P185-2-HW-HW10125B  | JF977638 | JN046052 | JF943121 | JF955230 |
| Eudicotyledons | Orobanchaceae | <i>Pedicularis</i> | <i>Pedicularis macrorhyncha</i> | P185-1-HW-HW10125A  | JF977639 | JN046053 | JF943122 | JF955231 |
| Eudicotyledons | Orobanchaceae | <i>Pedicularis</i> | <i>Pedicularis lyrata</i>       | P59-2-HW-LIDZ1109   | JF977636 | JN046050 | JF943119 | JF955228 |
| Eudicotyledons | Orobanchaceae | <i>Pedicularis</i> | <i>Pedicularis lyrata</i>       | P59-1-HW-LIDZ1093   | JF977637 | JN046051 | JF943120 | JF955229 |
| Eudicotyledons | Orobanchaceae | <i>Pedicularis</i> | <i>Pedicularis lyrata</i>       | P59-5-HW-LIDZ1200   | JF977633 | JN046047 | JF943116 | JF955225 |
| Eudicotyledons | Orobanchaceae | <i>Pedicularis</i> | <i>Pedicularis lyrata</i>       | P59-3-HW-LIDZ1175   | JF977635 | JN046049 | JF943118 | JF955227 |
| Eudicotyledons | Orobanchaceae | <i>Pedicularis</i> | <i>Pedicularis lyrata</i>       | P59-4-HW-LIDZ1083   | JF977634 | JN046048 | JF943117 | JF955226 |
| Eudicotyledons | Orobanchaceae | <i>Pedicularis</i> | <i>Pedicularis lyrata</i>       | P59-7-HW-LIDZ1206   | JF977631 | JN046045 | JF943114 | JF955223 |
| Eudicotyledons | Orobanchaceae | <i>Pedicularis</i> | <i>Pedicularis lyrata</i>       | P59-6-HW-08914      | JF977632 | JN046046 | JF943115 | JF955224 |
| Eudicotyledons | Orobanchaceae | <i>Pedicularis</i> | <i>Pedicularis lutescens</i>    | P58-6-HW-HW10329    | JF977626 | JN046040 | JF943109 | JF955218 |
| Eudicotyledons | Orobanchaceae | <i>Pedicularis</i> | <i>Pedicularis lutescens</i>    | P58-3-HW-LIDZ1009   | JF977628 | JN046042 | JF943111 | JF955220 |
| Eudicotyledons | Orobanchaceae | <i>Pedicularis</i> | <i>Pedicularis lutescens</i>    | P58-5-HW-HW10203    | JF977627 | JN046041 | JF943110 | JF955219 |
| Eudicotyledons | Orobanchaceae | <i>Pedicularis</i> | <i>Pedicularis lutescens</i>    | P58-1-HW-LIDZ1267   | JF977630 | JN046044 | JF943113 | JF955222 |
| Eudicotyledons | Orobanchaceae | <i>Pedicularis</i> | <i>Pedicularis lutescens</i>    | P58-2-HW-YWB005     | JF977629 | JN046043 | JF943112 | JF955221 |
| Eudicotyledons | Orobanchaceae | <i>Pedicularis</i> | <i>Pedicularis longipes</i>     | P57-2-HW-HW10305    | JF977625 | JN046039 | JF943108 | JF955217 |
| Eudicotyledons | Orobanchaceae | <i>Pedicularis</i> | <i>Pedicularis longipes</i>     | P57-HW-LIDZ1205     | JF977624 | JN046038 | JF943107 | JF955216 |
| Eudicotyledons | Orobanchaceae | <i>Pedicularis</i> | <i>Pedicularis longicaulis</i>  | P55-HW-LIDZ1303     | JF977615 | JN046029 | JF943098 | JF955207 |
| Eudicotyledons | Orobanchaceae | <i>Pedicularis</i> | <i>Pedicularis longicaulis</i>  | P55-2-HW-LIDZ0986   | JF977618 | JN046032 | JF943101 | JF955210 |
| Eudicotyledons | Orobanchaceae | <i>Pedicularis</i> | <i>Pedicularis longicaulis</i>  | P55-4-HW-YWB270     | JF977616 | JN046030 | JF943099 | JF955208 |
| Eudicotyledons | Orobanchaceae | <i>Pedicularis</i> | <i>Pedicularis longicaulis</i>  | P55-3-HW-LIDZ1333   | JF977617 | JN046031 | JF943100 | JF955209 |
| Eudicotyledons | Orobanchaceae | <i>Pedicularis</i> | <i>Pedicularis lecomtei</i>     | P52-HW-LIDZ1257A    | JF977612 | JN046028 | JF943095 | JF955204 |
| Eudicotyledons | Orobanchaceae | <i>Pedicularis</i> | <i>Pedicularis lecomtei</i>     | P52-1-HW-LIDZ1257B  | JF977611 | JN046027 | JF943094 | JF955203 |
| Eudicotyledons | Orobanchaceae | <i>Pedicularis</i> | <i>Pedicularis lecomtei</i>     | P52-2-HW-HW10197    | JF977610 | JN046026 | JF943093 | JF955202 |
| Eudicotyledons | Orobanchaceae | <i>Pedicularis</i> | <i>Pedicularis latituba</i>     | P51-3-HW-HW10268    | JF977608 | JN046024 | JF943091 | JF955200 |
| Eudicotyledons | Orobanchaceae | <i>Pedicularis</i> | <i>Pedicularis latituba</i>     | P51-HW-LIDZ1208     | JF977607 | JN046023 | JF943090 | JF955199 |
| Eudicotyledons | Orobanchaceae | <i>Pedicularis</i> | <i>Pedicularis latituba</i>     | P51-2-HW-HW10252    | JF977609 | JN046025 | JF943092 | JF955201 |
| Eudicotyledons | Orobanchaceae | <i>Pedicularis</i> | <i>Pedicularis lachnoglossa</i> | P50-HW-LIDZ1094     | JF977602 | JN046018 | JF943085 | JF955194 |
| Eudicotyledons | Orobanchaceae | <i>Pedicularis</i> | <i>Pedicularis lachnoglossa</i> | P50-2-HW-HW10051    | JF977606 | JN046022 | JF943089 | JF955198 |
| Eudicotyledons | Orobanchaceae | <i>Pedicularis</i> | <i>Pedicularis lachnoglossa</i> | P50-4-HW-HW10206    | JF977604 | JN046020 | JF943087 | JF955196 |
| Eudicotyledons | Orobanchaceae | <i>Pedicularis</i> | <i>Pedicularis lachnoglossa</i> | P50-5-HW-HW10228    | JF977603 | JN046019 | JF943086 | JF955195 |

|                |               |                    |                                 |                   |          |          |          |          |
|----------------|---------------|--------------------|---------------------------------|-------------------|----------|----------|----------|----------|
| Eudicotyledons | Orobanchaceae | <i>Pedicularis</i> | <i>Pedicularis lachnoglossa</i> | P50-3-HW-HW10140  | JF977605 | JN046021 | JF943088 | JF955197 |
| Eudicotyledons | Orobanchaceae | <i>Pedicularis</i> | <i>Pedicularis labordei</i>     | P49-1-HW-LIDZ1302 | JF977601 | JN046017 | JF943084 | JF955193 |
| Eudicotyledons | Orobanchaceae | <i>Pedicularis</i> | <i>Pedicularis labordei</i>     | P49-5-HW-LIDZ1335 | JF977597 | JN046013 | JF943080 | JF955189 |
| Eudicotyledons | Orobanchaceae | <i>Pedicularis</i> | <i>Pedicularis labordei</i>     | P49-3-HW-05121    | JF977599 | JN046015 | JF943082 | JF955191 |
| Eudicotyledons | Orobanchaceae | <i>Pedicularis</i> | <i>Pedicularis labordei</i>     | P49-4-HW-Yang003  | JF977598 | JN046014 | JF943081 | JF955190 |
| Eudicotyledons | Orobanchaceae | <i>Pedicularis</i> | <i>Pedicularis labordei</i>     | P49-2-HW-05120    | JF977600 | JN046016 | JF943083 | JF955192 |
| Eudicotyledons | Orobanchaceae | <i>Pedicularis</i> | <i>Pedicularis kansuensis</i>   | P47-5-HW-08880    | JF977593 | JN046009 | JF943076 | JF955186 |
| Eudicotyledons | Orobanchaceae | <i>Pedicularis</i> | <i>Pedicularis kansuensis</i>   | P47-3-HW-LIDZ1090 | JF977595 | JN046011 | JF943078 | JF955188 |
| Eudicotyledons | Orobanchaceae | <i>Pedicularis</i> | <i>Pedicularis kansuensis</i>   | P47-4-HW-LIDZ1207 | JF977594 | JN046010 | JF943077 | JF955187 |
| Eudicotyledons | Orobanchaceae | <i>Pedicularis</i> | <i>Pedicularis integrifolia</i> | P45-2-HW-HW10151  | JF977591 | JN046007 | JF943074 | JF955184 |
| Eudicotyledons | Orobanchaceae | <i>Pedicularis</i> | <i>Pedicularis integrifolia</i> | P45-4-HW-HW10230  | JF977589 | JN046005 | JF943072 | JF955182 |
| Eudicotyledons | Orobanchaceae | <i>Pedicularis</i> | <i>Pedicularis integrifolia</i> | P45-3-HW-LIDZ1159 | JF977590 | JN046006 | JF943073 | JF955183 |
| Eudicotyledons | Orobanchaceae | <i>Pedicularis</i> | <i>Pedicularis integrifolia</i> | P45-HW-08920      | JF977588 | JN046004 | JF943071 | JF955181 |
| Eudicotyledons | Orobanchaceae | <i>Pedicularis</i> | <i>Pedicularis ingens</i>       | P173-3-HW-HW10271 | JF977586 | JN046002 | JF943069 | JF955179 |
| Eudicotyledons | Orobanchaceae | <i>Pedicularis</i> | <i>Pedicularis ingens</i>       | P173-2-HW-HW10264 | JF977587 | JN046003 | JF943070 | JF955180 |
| Eudicotyledons | Orobanchaceae | <i>Pedicularis</i> | <i>Pedicularis gyrorhyncha</i>  | P43-3-HW-HW10161  | JF977584 | JN046000 | JF943067 | JF955177 |
| Eudicotyledons | Orobanchaceae | <i>Pedicularis</i> | <i>Pedicularis gyrorhyncha</i>  | P43-4-HW-HW10212  | JF977583 | JN045999 | JF943066 | JF955176 |
| Eudicotyledons | Orobanchaceae | <i>Pedicularis</i> | <i>Pedicularis gyrorhyncha</i>  | P43-1-HW-LIDZ1248 | JF977585 | JN046001 | JF943068 | JF955178 |
| Eudicotyledons | Orobanchaceae | <i>Pedicularis</i> | <i>Pedicularis gruina</i>       | P41-3-HW-LIDZ1058 | JF977580 | JN045996 | JF943063 | JF955173 |
| Eudicotyledons | Orobanchaceae | <i>Pedicularis</i> | <i>Pedicularis gruina</i>       | P41-6-HW-HW10358  | JF977577 | JN045993 | JF943060 | JF955170 |
| Eudicotyledons | Orobanchaceae | <i>Pedicularis</i> | <i>Pedicularis gruina</i>       | P41-1-HW-08720    | JF977582 | JN045998 | JF943065 | JF955175 |
| Eudicotyledons | Orobanchaceae | <i>Pedicularis</i> | <i>Pedicularis gruina</i>       | P41-2-HW-LIDZ1598 | JF977581 | JN045997 | JF943064 | JF955174 |
| Eudicotyledons | Orobanchaceae | <i>Pedicularis</i> | <i>Pedicularis gruina</i>       | P41-5-HW-LIDZ1054 | JF977578 | JN045994 | JF943061 | JF955171 |
| Eudicotyledons | Orobanchaceae | <i>Pedicularis</i> | <i>Pedicularis gruina</i>       | P41-4-HW-J199     | JF977579 | JN045995 | JF943062 | JF955172 |
| Eudicotyledons | Orobanchaceae | <i>Pedicularis</i> | <i>Pedicularis gracilis</i>     | P39-3-HW-08973    | JF977573 | JN045989 | JF943056 | JF955166 |
| Eudicotyledons | Orobanchaceae | <i>Pedicularis</i> | <i>Pedicularis gracilis</i>     | P39-5-HW-LIDZ1304 | JF977572 | JN045988 | JF943055 | JF955165 |
| Eudicotyledons | Orobanchaceae | <i>Pedicularis</i> | <i>Pedicularis gracilis</i>     | P39-2-HW-081128   | JF977574 | JN045990 | JF943057 | JF955167 |
| Eudicotyledons | Orobanchaceae | <i>Pedicularis</i> | <i>Pedicularis gracilis</i>     | P39-1-HW-J171     | JF977575 | JN045991 | JF943058 | JF955168 |
| Eudicotyledons | Orobanchaceae | <i>Pedicularis</i> | <i>Pedicularis glabrescens</i>  | P38-HW-LIDZ1272   | JF977568 | JN045984 | JF943051 | JF955161 |
| Eudicotyledons | Orobanchaceae | <i>Pedicularis</i> | <i>Pedicularis glabrescens</i>  | P38-5-HW-HW10098  | JF977569 | JN045985 | JF943052 | JF955162 |
| Eudicotyledons | Orobanchaceae | <i>Pedicularis</i> | <i>Pedicularis glabrescens</i>  | P38-2-HW-HW10211  | JF977571 | JN045987 | JF943054 | JF955164 |
| Eudicotyledons | Orobanchaceae | <i>Pedicularis</i> | <i>Pedicularis glabrescens</i>  | P38-4-HW-HW10162  | JF977570 | JN045986 | JF943053 | JF955163 |
| Eudicotyledons | Orobanchaceae | <i>Pedicularis</i> | <i>Pedicularis floribunda</i>   | P37-2-HW-LIDZ1187 | JF977567 | JN045983 | JF943050 | JF955160 |
| Eudicotyledons | Orobanchaceae | <i>Pedicularis</i> | <i>Pedicularis floribunda</i>   | P37-HW-LIDZ1190   | JF977566 | JN045982 | JF943049 | JF955159 |
| Eudicotyledons | Orobanchaceae | <i>Pedicularis</i> | <i>Pedicularis fengii</i>       | P158-2-HW-Yu606   | JF977564 | JN045980 | JF943047 | JF955157 |
| Eudicotyledons | Orobanchaceae | <i>Pedicularis</i> | <i>Pedicularis fengii</i>       | P158-1-HW-HW10153 | JF977565 | JN045981 | JF943048 | JF955158 |
| Eudicotyledons | Orobanchaceae | <i>Pedicularis</i> | <i>Pedicularis fengii</i>       | P158-3-HW-HW10369 | JF977563 | JN045979 | JF943046 | JF955156 |
| Eudicotyledons | Orobanchaceae | <i>Pedicularis</i> | <i>Pedicularis elwesii</i>      | P33-2-HW-LIDZ1259 | JF977561 | JN045977 | JF943044 | JF955154 |
| Eudicotyledons | Orobanchaceae | <i>Pedicularis</i> | <i>Pedicularis elwesii</i>      | P33-3-HW-HW10204  | JF977560 | JN045976 | JF943043 | JF955153 |
| Eudicotyledons | Orobanchaceae | <i>Pedicularis</i> | <i>Pedicularis elwesii</i>      | P33-4-HW-081419   | JF977559 | JN045975 | JF943042 | JF955152 |



|                |               |                    |                                     |                   |          |          |          |          |
|----------------|---------------|--------------------|-------------------------------------|-------------------|----------|----------|----------|----------|
| Eudicotyledons | Orobanchaceae | <i>Pedicularis</i> | <i>Pedicularis elwesii</i>          | P33-1-HW-LL07019  | JF977562 | JN045978 | JF943045 | JF955155 |
| Eudicotyledons | Orobanchaceae | <i>Pedicularis</i> | <i>Pedicularis dunniana</i>         | P31-HW-LIDZ1585   | JF977556 | JN045972 | JF943039 | JF955149 |
| Eudicotyledons | Orobanchaceae | <i>Pedicularis</i> | <i>Pedicularis dunniana</i>         | P31-3-HW-HW10341  | JF977557 | JN045973 | JF943040 | JF955150 |
| Eudicotyledons | Orobanchaceae | <i>Pedicularis</i> | <i>Pedicularis dunniana</i>         | P31-2-HW-HW10138  | JF977558 | JN045974 | JF943041 | JF955151 |
| Eudicotyledons | Orobanchaceae | <i>Pedicularis</i> | <i>Pedicularis dolichocymba</i>     | P30-HW-08827      | JF977554 | JN045970 | JF943037 | JF955147 |
| Eudicotyledons | Orobanchaceae | <i>Pedicularis</i> | <i>Pedicularis dolichocymba</i>     | P30-2-HW-HW10129  | JF977555 | JN045971 | JF943038 | JF955148 |
| Eudicotyledons | Orobanchaceae | <i>Pedicularis</i> | <i>Pedicularis dissectifolia</i>    | P106-2-HW-HW10102 | JF977553 | JN045969 | JF943036 | JF955146 |
| Eudicotyledons | Orobanchaceae | <i>Pedicularis</i> | <i>Pedicularis dissectifolia</i>    | P106-HW-HP9544    | JF977552 | JN045968 | JF943035 | JF955145 |
| Eudicotyledons | Orobanchaceae | <i>Pedicularis</i> | <i>Pedicularis dichotoma</i>        | P28-3-HW-LIDZ1125 | JF977550 | JN045966 | JF943033 | JF955143 |
| Eudicotyledons | Orobanchaceae | <i>Pedicularis</i> | <i>Pedicularis dichotoma</i>        | P28-HW-08811      | JF977548 | JN045964 | JF943031 | JF955141 |
| Eudicotyledons | Orobanchaceae | <i>Pedicularis</i> | <i>Pedicularis dichotoma</i>        | P28-4-HW-LIDZ1278 | JF977549 | JN045965 | JF943032 | JF955142 |
| Eudicotyledons | Orobanchaceae | <i>Pedicularis</i> | <i>Pedicularis dichotoma</i>        | P28-2-HW-081584   | JF977551 | JN045967 | JF943034 | JF955144 |
| Eudicotyledons | Orobanchaceae | <i>Pedicularis</i> | <i>Pedicularis densispica</i>       | P27-1-HW-08722    | JF977547 | JN045963 | JF943030 | JF955140 |
| Eudicotyledons | Orobanchaceae | <i>Pedicularis</i> | <i>Pedicularis densispica</i>       | P27-4-HW-03062    | JF977545 | JN045961 | JF943028 | JF955138 |
| Eudicotyledons | Orobanchaceae | <i>Pedicularis</i> | <i>Pedicularis densispica</i>       | P27-3-HW-03061    | JF977546 | JN045962 | JF943029 | JF955139 |
| Eudicotyledons | Orobanchaceae | <i>Pedicularis</i> | <i>Pedicularis densispica</i>       | P27-7-HW-HW10210  | JF977543 | JN045959 | JF943026 | JF955136 |
| Eudicotyledons | Orobanchaceae | <i>Pedicularis</i> | <i>Pedicularis densispica</i>       | P27-6-HW-HW10231  | JF977544 | JN045960 | JF943027 | JF955137 |
| Eudicotyledons | Orobanchaceae | <i>Pedicularis</i> | <i>Pedicularis deltoidea</i>        | P26-2-HW-HW10007  | JF977542 | JN045958 | JF943025 | JF955135 |
| Eudicotyledons | Orobanchaceae | <i>Pedicularis</i> | <i>Pedicularis deltoidea</i>        | P26-HW-LIDZ1309   | JF977541 | JN045957 | JF943024 | JF955134 |
| Eudicotyledons | Orobanchaceae | <i>Pedicularis</i> | <i>Pedicularis decorissima</i>      | P25-2-HW-LIDZ1162 | JF977540 | JN045956 | JF943023 | JF955133 |
| Eudicotyledons | Orobanchaceae | <i>Pedicularis</i> | <i>Pedicularis decorissima</i>      | P25-HW-YWB203     | JF977539 | JN045955 | JF943022 | JF955132 |
| Eudicotyledons | Orobanchaceae | <i>Pedicularis</i> | <i>Pedicularis decora</i>           | P32-HW-LIDZ1171A  | JF977537 | JN045953 | JF943020 | JF955130 |
| Eudicotyledons | Orobanchaceae | <i>Pedicularis</i> | <i>Pedicularis decora</i>           | P32-1-HW-HW10242  | JF977538 | JN045954 | JF943021 | JF955131 |
| Eudicotyledons | Orobanchaceae | <i>Pedicularis</i> | <i>Pedicularis debilis</i>          | P180-1-HW-HW10174 | JF977536 | JN045952 | JF943019 | JF955129 |
| Eudicotyledons | Orobanchaceae | <i>Pedicularis</i> | <i>Pedicularis debilis</i>          | P180-2-HW-HW10106 | JF977535 | JN045951 | JF943018 | JF955128 |
| Eudicotyledons | Orobanchaceae | <i>Pedicularis</i> | <i>Pedicularis debilis</i>          | P180-3-HW-HW10131 | JF977534 | JN045950 | JF943017 | JF955127 |
| Eudicotyledons | Orobanchaceae | <i>Pedicularis</i> | <i>Pedicularis davidii</i>          | P23-3-HW-YWB206   | JF977532 | JN045948 | JF943015 | JF955125 |
| Eudicotyledons | Orobanchaceae | <i>Pedicularis</i> | <i>Pedicularis davidii</i>          | P23-2-HW-LIDZ1059 | JF977533 | JN045949 | JF943016 | JF955126 |
| Eudicotyledons | Orobanchaceae | <i>Pedicularis</i> | <i>Pedicularis davidii</i>          | P23-HW-J238       | JF977531 | JN045947 | JF943014 | JF955124 |
| Eudicotyledons | Orobanchaceae | <i>Pedicularis</i> | <i>Pedicularis cymbalaria</i>       | P22-3-HW-LIDZ1209 | JF977528 | JN045944 | JF943011 | JF955121 |
| Eudicotyledons | Orobanchaceae | <i>Pedicularis</i> | <i>Pedicularis cymbalaria</i>       | P22-2-HW-HP9804   | JF977529 | JN045945 | JF943012 | JF955122 |
| Eudicotyledons | Orobanchaceae | <i>Pedicularis</i> | <i>Pedicularis cymbalaria</i>       | P22-1-HW-HP9536   | JF977530 | JN045946 | JF943013 | JF955123 |
| Eudicotyledons | Orobanchaceae | <i>Pedicularis</i> | <i>Pedicularis cymbalaria</i>       | P22-5-HW-HW10116  | JF977527 | JN045943 | JF943010 | JF955120 |
| Eudicotyledons | Orobanchaceae | <i>Pedicularis</i> | <i>Pedicularis cyathophylloides</i> | P20-1-HW-YWB132   | JF977526 | JN045942 | JF943009 | JF955119 |
| Eudicotyledons | Orobanchaceae | <i>Pedicularis</i> | <i>Pedicularis cyathophylloides</i> | P20-4-HW-36271    | JF977524 | JN045940 | JF943007 | JF955117 |
| Eudicotyledons | Orobanchaceae | <i>Pedicularis</i> | <i>Pedicularis cyathophylloides</i> | P20-6-HW-41954    | JF977522 | JN045938 | JF943005 | JF955115 |

|                |               |                    |                                     |                    |          |          |          |          |
|----------------|---------------|--------------------|-------------------------------------|--------------------|----------|----------|----------|----------|
| Eudicotyledons | Orobanchaceae | <i>Pedicularis</i> | <i>Pedicularis cyathophylloides</i> | P20-2-HW-LIDZ1194  | JF977525 | JN045941 | JF943008 | JF955118 |
| Eudicotyledons | Orobanchaceae | <i>Pedicularis</i> | <i>Pedicularis cyathophylloides</i> | P20-5-HW-41478     | JF977523 | JN045939 | JF943006 | JF955116 |
| Eudicotyledons | Orobanchaceae | <i>Pedicularis</i> | <i>Pedicularis cyathophylla</i>     | P19-6-HW-HW10215   | JF977517 | JN045933 | JF943000 | JF955110 |
| Eudicotyledons | Orobanchaceae | <i>Pedicularis</i> | <i>Pedicularis cyathophylla</i>     | P19-1-HW-LIDZ1180  | JF977521 | JN045937 | JF943004 | JF955114 |
| Eudicotyledons | Orobanchaceae | <i>Pedicularis</i> | <i>Pedicularis cyathophylla</i>     | P19-5-HW-LIDZ1268  | JF977518 | JN045934 | JF943001 | JF955111 |
| Eudicotyledons | Orobanchaceae | <i>Pedicularis</i> | <i>Pedicularis cyathophylla</i>     | P19-3-HW-LIDZ1198  | JF977520 | JN045936 | JF943003 | JF955113 |
| Eudicotyledons | Orobanchaceae | <i>Pedicularis</i> | <i>Pedicularis cyathophylla</i>     | P19-4-HW-LIDZ1204  | JF977519 | JN045935 | JF943002 | JF955112 |
| Eudicotyledons | Orobanchaceae | <i>Pedicularis</i> | <i>Pedicularis crenata</i>          | P16-4-HW-LIDZ1026  | JF977513 | JN045929 | JF942996 | JF955106 |
| Eudicotyledons | Orobanchaceae | <i>Pedicularis</i> | <i>Pedicularis crenata</i>          | P16-2-HW-LIDZ1020  | JF977515 | JN045931 | JF942998 | JF955108 |
| Eudicotyledons | Orobanchaceae | <i>Pedicularis</i> | <i>Pedicularis crenata</i>          | P16-3-HW-HW10182   | JF977514 | JN045930 | JF942997 | JF955107 |
| Eudicotyledons | Orobanchaceae | <i>Pedicularis</i> | <i>Pedicularis crenata</i>          | P16-1-HW-LIDZ1244  | JF977516 | JN045932 | JF942999 | JF955109 |
| Eudicotyledons | Orobanchaceae | <i>Pedicularis</i> | <i>Pedicularis cranolopha</i>       | P15-2-HW-LIDZ1221  | JF977511 | JN045927 | JF942994 | JF955104 |
| Eudicotyledons | Orobanchaceae | <i>Pedicularis</i> | <i>Pedicularis cranolopha</i>       | P15-3-HW-LIDZ1232  | JF977510 | JN045926 | JF942993 | JF955103 |
| Eudicotyledons | Orobanchaceae | <i>Pedicularis</i> | <i>Pedicularis cranolopha</i>       | P15-5-HW-LIDZ1197  | JF977508 | JN045924 | JF942991 | JF955101 |
| Eudicotyledons | Orobanchaceae | <i>Pedicularis</i> | <i>Pedicularis cranolopha</i>       | P15-7-HW-HW10300   | JF977506 | JN045922 | JF942989 | JF955099 |
| Eudicotyledons | Orobanchaceae | <i>Pedicularis</i> | <i>Pedicularis cranolopha</i>       | P15-4-HW-LIDZ1082  | JF977509 | JN045925 | JF942992 | JF955102 |
| Eudicotyledons | Orobanchaceae | <i>Pedicularis</i> | <i>Pedicularis cranolopha</i>       | P15-6-HW-HW10227   | JF977507 | JN045923 | JF942990 | JF955100 |
| Eudicotyledons | Orobanchaceae | <i>Pedicularis</i> | <i>Pedicularis cranolopha</i>       | P15-1-HW-LIDZ1220  | JF977512 | JN045928 | JF942995 | JF955105 |
| Eudicotyledons | Orobanchaceae | <i>Pedicularis</i> | <i>Pedicularis confertiflora</i>    | P14-2-HW-LIDZ1524  | JF977504 | JN045920 | JF942987 | JF955097 |
| Eudicotyledons | Orobanchaceae | <i>Pedicularis</i> | <i>Pedicularis confertiflora</i>    | P14-5-HW-08845     | JF977501 | JN045917 | JF942984 | JF955094 |
| Eudicotyledons | Orobanchaceae | <i>Pedicularis</i> | <i>Pedicularis confertiflora</i>    | P14-1-HW-LIDZ1310  | JF977505 | JN045921 | JF942988 | JF955098 |
| Eudicotyledons | Orobanchaceae | <i>Pedicularis</i> | <i>Pedicularis confertiflora</i>    | P14-4-HW-03056     | JF977502 | JN045918 | JF942985 | JF955095 |
| Eudicotyledons | Orobanchaceae | <i>Pedicularis</i> | <i>Pedicularis confertiflora</i>    | P14-3-HW-LIDZ1528  | JF977503 | JN045919 | JF942986 | JF955096 |
| Eudicotyledons | Orobanchaceae | <i>Pedicularis</i> | <i>Pedicularis comptoniifolia</i>   | P13-2-HW-HW10180   | JF977500 | JN045916 | JF942983 | JF955093 |
| Eudicotyledons | Orobanchaceae | <i>Pedicularis</i> | <i>Pedicularis comptoniifolia</i>   | P13-4-HW-LIDZ0996  | JF977499 | JN045915 | JF942982 | JF955092 |
| Eudicotyledons | Orobanchaceae | <i>Pedicularis</i> | <i>Pedicularis clarkei</i>          | P12-2-HW-081390B   | JF977496 | JN045913 | JF942979 | JF955090 |
| Eudicotyledons | Orobanchaceae | <i>Pedicularis</i> | <i>Pedicularis clarkei</i>          | P12-1-HW-081390A   | JF977497 | JN045914 | JF942980 | JF955091 |
| Eudicotyledons | Orobanchaceae | <i>Pedicularis</i> | <i>Pedicularis cinerascens</i>      | P184-1-HW-HW10311A | JF977495 | JN045912 | JF942978 | JF955089 |
| Eudicotyledons | Orobanchaceae | <i>Pedicularis</i> | <i>Pedicularis cinerascens</i>      | P184-2-HW-HW10311B | JF977494 | JN045911 | JF942977 | JF955088 |
| Eudicotyledons | Orobanchaceae | <i>Pedicularis</i> | <i>Pedicularis cephalantha</i>      | P10-3-HW-LIDZ1036  | JF977491 | JN045909 | JF942974 | JF955085 |
| Eudicotyledons | Orobanchaceae | <i>Pedicularis</i> | <i>Pedicularis cephalantha</i>      | P10-7-HW-HW10093   | JF977487 | JN045905 | JF942970 | JF955081 |
| Eudicotyledons | Orobanchaceae | <i>Pedicularis</i> | <i>Pedicularis cephalantha</i>      | P10-6-HW-HW10013   | JF977488 | JN045906 | JF942971 | JF955082 |
| Eudicotyledons | Orobanchaceae | <i>Pedicularis</i> | <i>Pedicularis cephalantha</i>      | P10-2-HW-LIDZ1013  | JF977492 | JN045910 | JF942975 | JF955086 |
| Eudicotyledons | Orobanchaceae | <i>Pedicularis</i> | <i>Pedicularis cephalantha</i>      | P10-5-HW-YWB500    | JF977489 | JN045907 | JF942972 | JF955083 |
| Eudicotyledons | Orobanchaceae | <i>Pedicularis</i> | <i>Pedicularis cephalantha</i>      | P10-4-HW-J208      | JF977490 | JN045908 | JF942973 | JF955084 |
| Eudicotyledons | Orobanchaceae | <i>Pedicularis</i> | <i>Pedicularis brevilabris</i>      | P9-HW-LIDZ1172     | JF977483 | JN045901 | JF942966 | JF955077 |
| Eudicotyledons | Orobanchaceae | <i>Pedicularis</i> | <i>Pedicularis brevilabris</i>      | P9-4-HW-HW10325    | JF977484 | JN045902 | JF942967 | JF955078 |
| Eudicotyledons | Orobanchaceae | <i>Pedicularis</i> | <i>Pedicularis brevilabris</i>      | P9-2-HW-HW10250    | JF977486 | JN045904 | JF942969 | JF955080 |

|                |               |                    |                                |                    |          |          |          |          |
|----------------|---------------|--------------------|--------------------------------|--------------------|----------|----------|----------|----------|
| Eudicotyledons | Orobanchaceae | <i>Pedicularis</i> | <i>Pedicularis brevilabris</i> | P9-3-HW-HW10304    | JF977485 | JN045903 | JF942968 | JF955079 |
| Eudicotyledons | Orobanchaceae | <i>Pedicularis</i> | <i>Pedicularis batangensis</i> | P8-3-HW-LIDZ1095   | JF977480 | JN045898 | JF942963 | JF955074 |
| Eudicotyledons | Orobanchaceae | <i>Pedicularis</i> | <i>Pedicularis batangensis</i> | P8-1-HW-LIDZ1067   | JF977482 | JN045900 | JF942965 | JF955076 |
| Eudicotyledons | Orobanchaceae | <i>Pedicularis</i> | <i>Pedicularis batangensis</i> | P8-4-HW-LIDZ1188   | JF977479 | JN045897 | JF942962 | JF955073 |
| Eudicotyledons | Orobanchaceae | <i>Pedicularis</i> | <i>Pedicularis batangensis</i> | P8-2-HW-LIDZ1124   | JF977481 | JN045899 | JF942964 | JF955075 |
| Eudicotyledons | Orobanchaceae | <i>Pedicularis</i> | <i>Pedicularis axillaris</i>   | P7-2-HW-HW10005    | JF977477 | JN045895 | JF942960 | JF955071 |
| Eudicotyledons | Orobanchaceae | <i>Pedicularis</i> | <i>Pedicularis axillaris</i>   | P7-4-HW-HW10207    | JF977475 | JN045893 | JF942958 | JF955069 |
| Eudicotyledons | Orobanchaceae | <i>Pedicularis</i> | <i>Pedicularis axillaris</i>   | P7-1-HW-LIDZ1290   | JF977478 | JN045896 | JF942961 | JF955072 |
| Eudicotyledons | Orobanchaceae | <i>Pedicularis</i> | <i>Pedicularis axillaris</i>   | P7-3-HW-HW10097    | JF977476 | JN045894 | JF942959 | JF955070 |
| Eudicotyledons | Orobanchaceae | <i>Pedicularis</i> | <i>Pedicularis anas</i>        | P4-3-HW-HW10255    | JF977472 | JN045890 | JF942955 | JF955066 |
| Eudicotyledons | Orobanchaceae | <i>Pedicularis</i> | <i>Pedicularis anas</i>        | P4-2-HW-LIDZ1214   | JF977473 | JN045891 | JF942956 | JF955067 |
| Eudicotyledons | Orobanchaceae | <i>Pedicularis</i> | <i>Pedicularis anas</i>        | P4-4-HW-HW10274    | JF977471 | JN045889 | JF942954 | JF955065 |
| Eudicotyledons | Orobanchaceae | <i>Pedicularis</i> | <i>Pedicularis anas</i>        | P4-1-HW-LIDZ1136   | JF977474 | JN045892 | JF942957 | JF955068 |
| Eudicotyledons | Orobanchaceae | <i>Pedicularis</i> | <i>Pedicularis anas</i>        | P4-5-HW-HW10293    | JF977470 | JN045888 | JF942953 | JF955064 |
| Eudicotyledons | Orobanchaceae | <i>Pedicularis</i> | <i>Pedicularis amplituba</i>   | P66-2-HW-LIDZ1519B | JF977468 | JN045886 | JF942951 | JF955062 |
| Eudicotyledons | Orobanchaceae | <i>Pedicularis</i> | <i>Pedicularis amplituba</i>   | P66-1-HW-LIDZ1519A | JF977469 | JN045887 | JF942952 | JF955063 |
| Eudicotyledons | Orobanchaceae | <i>Pedicularis</i> | <i>Pedicularis alopecuros</i>  | P3-5-HW-LIDZ1334   | JF977463 | JN045881 | JF942946 | JF955057 |
| Eudicotyledons | Orobanchaceae | <i>Pedicularis</i> | <i>Pedicularis alopecuros</i>  | P3-6-HW-HP9687     | JF977462 | JN045880 | JF942945 | JF955056 |
| Eudicotyledons | Orobanchaceae | <i>Pedicularis</i> | <i>Pedicularis alopecuros</i>  | P3-2-HW-LIDZ1055   | JF977466 | JN045884 | JF942949 | JF955060 |
| Eudicotyledons | Orobanchaceae | <i>Pedicularis</i> | <i>Pedicularis alopecuros</i>  | P3-1-HW-LIDZ0994   | JF977467 | JN045885 | JF942950 | JF955061 |
| Eudicotyledons | Orobanchaceae | <i>Pedicularis</i> | <i>Pedicularis alopecuros</i>  | P3-3-HW-Yang004    | JF977465 | JN045883 | JF942948 | JF955059 |
| Eudicotyledons | Orobanchaceae | <i>Pedicularis</i> | <i>Pedicularis alopecuros</i>  | P3-4-HW-LIDZ1502   | JF977464 | JN045882 | JF942947 | JF955058 |
| Eudicotyledons | Orobanchaceae | <i>Pedicularis</i> | <i>Pedicularis alaschanica</i> | P1-2-HW-08913      | JF977460 | JN045878 | JF942943 | JF955054 |
| Eudicotyledons | Orobanchaceae | <i>Pedicularis</i> | <i>Pedicularis alaschanica</i> | P1-1-HW-YWB201     | JF977461 | JN045879 | JF942944 | JF955055 |
| Eudicotyledons | Orobanchaceae | <i>Pedicularis</i> | <i>Pedicularis alaschanica</i> | P1-3-HW-08929      | JF977459 | JN045877 | JF942942 | JF955053 |
| Eudicotyledons | Celastraceae  | <i>Parnassia</i>   | <i>Parnassia yunnanensis</i>   | wud05053           | JF977455 | JN045872 | JF942936 | JF955048 |
| Eudicotyledons | Celastraceae  | <i>Parnassia</i>   | <i>Parnassia yunnanensis</i>   | wud032-1           | JF977457 | JN045875 | JF942939 | JF955050 |
| Eudicotyledons | Celastraceae  | <i>Parnassia</i>   | <i>Parnassia yunnanensis</i>   | wud032-2           | JF977456 | JN045874 | JF942938 | JF955049 |
| Eudicotyledons | Celastraceae  | <i>Parnassia</i>   | <i>Parnassia yunnanensis</i>   | Wud03066           | JF811127 | JF802397 | JF802302 | JF802492 |
| Eudicotyledons | Celastraceae  | <i>Parnassia</i>   | <i>Parnassia yunnanensis</i>   | wud03066           | JF811127 | JF802397 | JF802302 | JF802492 |
| Eudicotyledons | Celastraceae  | <i>Parnassia</i>   | <i>Parnassia yunnanensis</i>   | Wud032-1           | JF977457 | JN045875 | JF942939 | JF955050 |
| Eudicotyledons | Celastraceae  | <i>Parnassia</i>   | <i>Parnassia yunnanensis</i>   | Wud032-2           | JF977456 | JN045874 | JF942938 | JF955049 |
| Eudicotyledons | Celastraceae  | <i>Parnassia</i>   | <i>Parnassia yunnanensis</i>   | Wud04209           | JF811130 | JF802400 | JF802305 | JF802495 |
| Eudicotyledons | Celastraceae  | <i>Parnassia</i>   | <i>Parnassia wightiana</i>     | wud019             | JF977453 | JN045870 | JF942934 | JF955046 |
| Eudicotyledons | Celastraceae  | <i>Parnassia</i>   | <i>Parnassia wightiana</i>     | Wud124             | JF811123 | JF802393 | JF802298 | JF802488 |
| Eudicotyledons | Celastraceae  | <i>Parnassia</i>   | <i>Parnassia wightiana</i>     | Wud1388            | JF811125 | JF802395 | JF802300 | JF802490 |
| Eudicotyledons | Celastraceae  | <i>Parnassia</i>   | <i>Parnassia wightiana</i>     | Wud019             | JF977453 | JN045870 | JF942934 | JF955046 |
| Eudicotyledons | Celastraceae  | <i>Parnassia</i>   | <i>Parnassia wightiana</i>     | wud1388            | JF811125 | JF802395 | JF802300 | JF802490 |
| Eudicotyledons | Celastraceae  | <i>Parnassia</i>   | <i>Parnassia wightiana</i>     | Wud090571          | JF977421 | JN045836 | JF942892 | JF955009 |
| Eudicotyledons | Celastraceae  | <i>Parnassia</i>   | <i>Parnassia wightiana</i>     | Wud246             | JF811126 | JF802396 | JF802301 | JF802491 |

|                |              |                  |                                |           |          |          |          |          |
|----------------|--------------|------------------|--------------------------------|-----------|----------|----------|----------|----------|
| Eudicotyledons | Celastraceae | <i>Parnassia</i> | <i>Parnassia wightiana</i>     | Wud024    | JF977452 | JN045869 | JF942933 | JF955045 |
| Eudicotyledons | Celastraceae | <i>Parnassia</i> | <i>Parnassia wightiana</i>     | wud09483  | JF811122 | JF802392 | JF802297 | JF802487 |
| Eudicotyledons | Celastraceae | <i>Parnassia</i> | <i>Parnassia wightiana</i>     | wud007    | JF977454 | JN045871 | JF942935 | JF955047 |
| Eudicotyledons | Celastraceae | <i>Parnassia</i> | <i>Parnassia wightiana</i>     | Wud09483  | JF811122 | JF802392 | JF802297 | JF802487 |
| Eudicotyledons | Celastraceae | <i>Parnassia</i> | <i>Parnassia wightiana</i>     | Wud0904   | JF811120 | JF802390 | JF802295 | JF802485 |
| Eudicotyledons | Celastraceae | <i>Parnassia</i> | <i>Parnassia wightiana</i>     | wud024    | JF977452 | JN045869 | JF942933 | JF955045 |
| Eudicotyledons | Celastraceae | <i>Parnassia</i> | <i>Parnassia wightiana</i>     | Wud128    | JF811124 | JF802394 | JF802299 | JF802489 |
| Eudicotyledons | Celastraceae | <i>Parnassia</i> | <i>Parnassia wightiana</i>     | wud0904   | JF811120 | JF802390 | JF802295 | JF802485 |
| Eudicotyledons | Celastraceae | <i>Parnassia</i> | <i>Parnassia wightiana</i>     | Wud02012  | JF811118 | JF802388 | JF802293 | JF802483 |
| Eudicotyledons | Celastraceae | <i>Parnassia</i> | <i>Parnassia wightiana</i>     | Wud007    | JF977454 | JN045871 | JF942935 | JF955047 |
| Eudicotyledons | Celastraceae | <i>Parnassia</i> | <i>Parnassia viridiflora</i>   | wud090664 | JF977446 | JN045864 | JF942927 | JF955040 |
| Eudicotyledons | Celastraceae | <i>Parnassia</i> | <i>Parnassia viridiflora</i>   | Wud090664 | JF977446 | JN045864 | JF942927 | JF955040 |
| Eudicotyledons | Celastraceae | <i>Parnassia</i> | <i>Parnassia viridiflora</i>   | Wud03065  | JF811114 | JF802384 | JF802289 | JF802479 |
| Eudicotyledons | Celastraceae | <i>Parnassia</i> | <i>Parnassia venusta</i>       | wud129    | JF977445 | JN045863 | JF942926 | JF955039 |
| Eudicotyledons | Celastraceae | <i>Parnassia</i> | <i>Parnassia venusta</i>       | Wud2322   | JF811113 | JF802383 | JF802288 | JF802478 |
| Eudicotyledons | Celastraceae | <i>Parnassia</i> | <i>Parnassia venusta</i>       | wud2322   | JF811113 | JF802383 | JF802288 | JF802478 |
| Eudicotyledons | Celastraceae | <i>Parnassia</i> | <i>Parnassia venusta</i>       | Wud129_3  | JF811112 | JF802382 | JF802287 | JF802477 |
| Eudicotyledons | Celastraceae | <i>Parnassia</i> | <i>Parnassia venusta</i>       | Wud129    | JF977445 | JN045863 | JF942926 | JF955039 |
| Eudicotyledons | Celastraceae | <i>Parnassia</i> | <i>Parnassia trinervis</i>     | wud091569 | JF977440 | JN045858 | JF942921 | JF955034 |
| Eudicotyledons | Celastraceae | <i>Parnassia</i> | <i>Parnassia trinervis</i>     | Wud03124  | JF811108 | JF802378 | JF802283 | JF802473 |
| Eudicotyledons | Celastraceae | <i>Parnassia</i> | <i>Parnassia trinervis</i>     | Wud05130  | JF811109 | JF802379 | JF802284 | JF802474 |
| Eudicotyledons | Celastraceae | <i>Parnassia</i> | <i>Parnassia trinervis</i>     | wud03124  | JF811108 | JF802378 | JF802283 | JF802473 |
| Eudicotyledons | Celastraceae | <i>Parnassia</i> | <i>Parnassia trinervis</i>     | Wud03081  | JF811107 | JF802377 | JF802282 | JF802472 |
| Eudicotyledons | Celastraceae | <i>Parnassia</i> | <i>Parnassia trinervis</i>     | Wud2100   | JF811110 | JF802380 | JF802285 | JF802475 |
| Eudicotyledons | Celastraceae | <i>Parnassia</i> | <i>Parnassia trinervis</i>     | wud0193   | JF977443 | JN045861 | JF942924 | JF955037 |
| Eudicotyledons | Celastraceae | <i>Parnassia</i> | <i>Parnassia trinervis</i>     | WudQ0193  | JF811106 | JF802376 | JF802281 | JF802471 |
| Eudicotyledons | Celastraceae | <i>Parnassia</i> | <i>Parnassia trinervis</i>     | wud03081  | JF811107 | JF802377 | JF802282 | JF802472 |
| Eudicotyledons | Celastraceae | <i>Parnassia</i> | <i>Parnassia tenella</i>       | wud120    | JF977437 | JN045853 | JF942915 | JF955029 |
| Eudicotyledons | Celastraceae | <i>Parnassia</i> | <i>Parnassia tenella</i>       | wud125-1  | JF977436 | JN045852 | JF942914 | JF955028 |
| Eudicotyledons | Celastraceae | <i>Parnassia</i> | <i>Parnassia tenella</i>       | Wud120    | JF977437 | JN045853 | JF942915 | JF955029 |
| Eudicotyledons | Celastraceae | <i>Parnassia</i> | <i>Parnassia tenella</i>       | Wud103062 | JF811102 | JF802372 | JF802277 | JF802467 |
| Eudicotyledons | Celastraceae | <i>Parnassia</i> | <i>Parnassia tenella</i>       | Wud02002  | JF811101 | JF802371 | JF802276 | JF802466 |
| Eudicotyledons | Celastraceae | <i>Parnassia</i> | <i>Parnassia tenella</i>       | Wud125-11 | JF811105 | JF802375 | JF802280 | JF802470 |
| Eudicotyledons | Celastraceae | <i>Parnassia</i> | <i>Parnassia tenella</i>       | Wud125-1  | JF977436 | JN045852 | JF942914 | JF955028 |
| Eudicotyledons | Celastraceae | <i>Parnassia</i> | <i>Parnassia tenella</i>       | wud103062 | JF811102 | JF802372 | JF802277 | JF802467 |
| Eudicotyledons | Celastraceae | <i>Parnassia</i> | <i>Parnassia submysorensis</i> | Wud03002  | JF811099 | JF802369 | JF802274 | JF802464 |
| Eudicotyledons | Celastraceae | <i>Parnassia</i> | <i>Parnassia submysorensis</i> | Wud05198  | JF811100 | JF802370 | JF802275 | JF802465 |
| Eudicotyledons | Celastraceae | <i>Parnassia</i> | <i>Parnassia perciliata</i>    | Wud026-10 | JF811097 | JF802367 | JF802272 | JF802462 |
| Eudicotyledons | Celastraceae | <i>Parnassia</i> | <i>Parnassia perciliata</i>    | Wud026-1  | JF977431 | JN045851 | JF942908 | JF955023 |
| Eudicotyledons | Celastraceae | <i>Parnassia</i> | <i>Parnassia perciliata</i>    | Wud281    | JF977429 | JN045847 | JF942904 | JF955019 |

|                |              |                  |                              |                                      |          |          |          |          |
|----------------|--------------|------------------|------------------------------|--------------------------------------|----------|----------|----------|----------|
| Eudicotyledons | Celastraceae | <i>Parnassia</i> | <i>Parnassia perciliata</i>  | wud026-1                             | JF977431 | JN045851 | JF942908 | JF955023 |
| Eudicotyledons | Celastraceae | <i>Parnassia</i> | <i>Parnassia perciliata</i>  | wud281                               | JF977429 | JN045847 | JF942904 | JF955019 |
| Eudicotyledons | Celastraceae | <i>Parnassia</i> | <i>Parnassia perciliata</i>  | wud029-1                             | JF977430 | JN045849 | JF942906 | JF955021 |
| Eudicotyledons | Celastraceae | <i>Parnassia</i> | <i>Parnassia palustris</i>   | Duncan & Tait 138                    | JF811094 | JF802364 | JF802270 | JF802459 |
| Eudicotyledons | Celastraceae | <i>Parnassia</i> | <i>Parnassia palustris</i>   | wud020672                            | JF977426 | JN045842 | JF942900 | JF955014 |
| Eudicotyledons | Celastraceae | <i>Parnassia</i> | <i>Parnassia palustris</i>   | Wud1001 3                            | JF811093 | JF802363 | JF802269 | JF802458 |
| Eudicotyledons | Celastraceae | <i>Parnassia</i> | <i>Parnassia palustris</i>   | wud249                               | JF977427 | JN045844 | JF942901 | JF955016 |
| Eudicotyledons | Celastraceae | <i>Parnassia</i> | <i>Parnassia palustris</i>   | N.A. Brjummitt & Bridger<br>M.A. 249 | JF811095 | JF802365 | JF795347 | JF802460 |
| Eudicotyledons | Celastraceae | <i>Parnassia</i> | <i>Parnassia palustris</i>   | Wud06050                             | JF811092 | JF802362 | JF802268 | JF802457 |
| Eudicotyledons | Celastraceae | <i>Parnassia</i> | <i>Parnassia palustris</i>   | wud138                               | JF977428 | JN045845 | JF942902 | JF955017 |
| Eudicotyledons | Celastraceae | <i>Parnassia</i> | <i>Parnassia nubicola</i>    | Wud1496                              | JF811089 | JF802359 | JF795345 | JF802454 |
| Eudicotyledons | Celastraceae | <i>Parnassia</i> | <i>Parnassia nubicola</i>    | M.F. Watson 28                       | JF811090 | JF802360 | JF795344 | JF802455 |
| Eudicotyledons | Celastraceae | <i>Parnassia</i> | <i>Parnassia noemiae</i>     | Peter Warten 020672                  | JF811091 | JF802361 | JF802267 | JF802456 |
| Eudicotyledons | Celastraceae | <i>Parnassia</i> | <i>Parnassia noemiae</i>     | Wud083-2                             | JF811088 | JF802358 | JF802266 | JF802453 |
| Eudicotyledons | Celastraceae | <i>Parnassia</i> | <i>Parnassia noemiae</i>     | wud02015                             | JF977425 | JN045839 | JF942897 | JF955013 |
| Eudicotyledons | Celastraceae | <i>Parnassia</i> | <i>Parnassia noemiae</i>     | Wud083 1                             | JN188291 | JN188290 | JN188289 | JN188288 |
| Eudicotyledons | Celastraceae | <i>Parnassia</i> | <i>Parnassia noemiae</i>     | Wud02015                             | JF977425 | JN045839 | JF942897 | JF955013 |
| Eudicotyledons | Celastraceae | <i>Parnassia</i> | <i>Parnassia mysorensis</i>  | wud090571                            | JF977421 | JN045836 | JF942892 | JF955009 |
| Eudicotyledons | Celastraceae | <i>Parnassia</i> | <i>Parnassia mysorensis</i>  | wud02010                             | JF977422 | JN045837 | JF942893 | JF955010 |
| Eudicotyledons | Celastraceae | <i>Parnassia</i> | <i>Parnassia mysorensis</i>  | Wud02010                             | JF977422 | JN045837 | JF942893 | JF955010 |
| Eudicotyledons | Celastraceae | <i>Parnassia</i> | <i>Parnassia mysorensis</i>  | Wud090727                            | JF811083 | JF802353 | JF802261 | JF802448 |
| Eudicotyledons | Celastraceae | <i>Parnassia</i> | <i>Parnassia mysorensis</i>  | wud123                               | JF977420 | JN045835 | JF942891 | JF955008 |
| Eudicotyledons | Celastraceae | <i>Parnassia</i> | <i>Parnassia mysorensis</i>  | Wud131                               | JF811086 | JF802356 | JF802264 | JF802451 |
| Eudicotyledons | Celastraceae | <i>Parnassia</i> | <i>Parnassia mysorensis</i>  | Wud123                               | JF977420 | JN045835 | JF942891 | JF955008 |
| Eudicotyledons | Celastraceae | <i>Parnassia</i> | <i>Parnassia mysorensis</i>  | Wud090835                            | JF811084 | JF802354 | JF802262 | JF802449 |
| Eudicotyledons | Celastraceae | <i>Parnassia</i> | <i>Parnassia mysorensis</i>  | wud131                               | JF811086 | JF802356 | JF802264 | JF802451 |
| Eudicotyledons | Celastraceae | <i>Parnassia</i> | <i>Parnassia lutea</i>       | Wud0339                              | JF811080 | JF802350 | JF802258 | JF802445 |
| Eudicotyledons | Celastraceae | <i>Parnassia</i> | <i>Parnassia lutea</i>       | Guobz9460                            | JF811081 | JF802351 | JF802259 | JF802446 |
| Eudicotyledons | Celastraceae | <i>Parnassia</i> | <i>Parnassia longipetala</i> | Wud08029                             | JF811078 | JF802348 | JF802256 | JF802443 |
| Eudicotyledons | Celastraceae | <i>Parnassia</i> | <i>Parnassia longipetala</i> | wud09945                             | JF977415 | JN045832 | JF942886 | JF955002 |
| Eudicotyledons | Celastraceae | <i>Parnassia</i> | <i>Parnassia longipetala</i> | Wud09945                             | JF977415 | JN045832 | JF942886 | JF955002 |
| Eudicotyledons | Celastraceae | <i>Parnassia</i> | <i>Parnassia longipetala</i> | wud08029                             | JF811078 | JF802348 | JF802256 | JF802443 |
| Eudicotyledons | Celastraceae | <i>Parnassia</i> | <i>Parnassia leptophylla</i> | wud0902-4                            | JF977414 | JN045831 | JF942885 | JF955001 |
| Eudicotyledons | Celastraceae | <i>Parnassia</i> | <i>Parnassia leptophylla</i> | wud0902-8                            | JF977413 | JN045829 | JF942884 | JF955000 |
| Eudicotyledons | Celastraceae | <i>Parnassia</i> | <i>Parnassia leptophylla</i> | Wud0902-4                            | JF977414 | JN045831 | JF942885 | JF955001 |
| Eudicotyledons | Celastraceae | <i>Parnassia</i> | <i>Parnassia leptophylla</i> | Wud0902-8                            | JF977413 | JN045829 | JF942884 | JF955000 |
| Eudicotyledons | Celastraceae | <i>Parnassia</i> | <i>Parnassia laxmannii</i>   | wud1696                              | JF977410 | JN045826 | JF942881 | JF954997 |
| Eudicotyledons | Celastraceae | <i>Parnassia</i> | <i>Parnassia laxmannii</i>   | wud091562                            | JF977411 | JN045827 | JF942882 | JF954998 |
| Eudicotyledons | Celastraceae | <i>Parnassia</i> | <i>Parnassia kotzebuei</i>   | Halliday G.A203                      | JF811074 | JF802344 | JF802252 | JF802439 |

|                |              |                  |                                |                  |          |          |          |          |
|----------------|--------------|------------------|--------------------------------|------------------|----------|----------|----------|----------|
| Eudicotyledons | Celastraceae | <i>Parnassia</i> | <i>Parnassia kotzebuei</i>     | Vornova T5634    | JF811075 | JF802345 | JF802253 | JF802440 |
| Eudicotyledons | Celastraceae | <i>Parnassia</i> | <i>Parnassia kangdingensis</i> | Wud108-11        | JF811072 | JF802342 | JF802250 | JF802437 |
| Eudicotyledons | Celastraceae | <i>Parnassia</i> | <i>Parnassia kangdingensis</i> | Wud108-2         | JF811073 | JF802343 | JF802251 | JF802438 |
| Eudicotyledons | Celastraceae | <i>Parnassia</i> | <i>Parnassia guilinensis</i>   | wud012-1         | JF977405 | JN045819 | JF942873 | JF954993 |
| Eudicotyledons | Celastraceae | <i>Parnassia</i> | <i>Parnassia guilinensis</i>   | Wud04042         | JF811071 | JF802341 | JF802249 | JF802436 |
| Eudicotyledons | Celastraceae | <i>Parnassia</i> | <i>Parnassia guilinensis</i>   | wud04042         | JF811071 | JF802341 | JF802249 | JF802436 |
| Eudicotyledons | Celastraceae | <i>Parnassia</i> | <i>Parnassia guilinensis</i>   | Wud012-2         | JF811070 | JF802340 | JF802248 | JF802435 |
| Eudicotyledons | Celastraceae | <i>Parnassia</i> | <i>Parnassia guilinensis</i>   | Wud012-1         | JF977405 | JN045819 | JF942873 | JF954993 |
| Eudicotyledons | Celastraceae | <i>Parnassia</i> | <i>Parnassia grandifolia</i>   | John Taylor23596 | JF811068 | JF802338 | JF802246 | JF802433 |
| Eudicotyledons | Celastraceae | <i>Parnassia</i> | <i>Parnassia grandifolia</i>   | Mcpougall WB1512 | JF811067 | JF802337 | JF802245 | JF802432 |
| Eudicotyledons | Celastraceae | <i>Parnassia</i> | <i>Parnassia foliosa</i>       | Wud0905-2        | JF811064 | JF802334 | JF802242 | JF802429 |
| Eudicotyledons | Celastraceae | <i>Parnassia</i> | <i>Parnassia foliosa</i>       | Wud0905-3        | JF811065 | JF802335 | JF802243 | JF802430 |
| Eudicotyledons | Celastraceae | <i>Parnassia</i> | <i>Parnassia foliosa</i>       | Wud0905-1        | JF811063 | JF802333 | JF802241 | JF802428 |
| Eudicotyledons | Celastraceae | <i>Parnassia</i> | <i>Parnassia foliosa</i>       | Wud09130         | JF811066 | JF802336 | JF802244 | JF802431 |
| Eudicotyledons | Celastraceae | <i>Parnassia</i> | <i>Parnassia foliosa</i>       | wud0905-2        | JF811064 | JF802334 | JF802242 | JF802429 |
| Eudicotyledons | Celastraceae | <i>Parnassia</i> | <i>Parnassia foliosa</i>       | wud0905-1        | JF811063 | JF802333 | JF802241 | JF802428 |
| Eudicotyledons | Celastraceae | <i>Parnassia</i> | <i>Parnassia foliosa</i>       | wud09130         | JF811066 | JF802336 | JF802244 | JF802431 |
| Eudicotyledons | Celastraceae | <i>Parnassia</i> | <i>Parnassia farreri</i>       | wud126           | JF977395 | JN045811 | JF942862 | JF954985 |
| Eudicotyledons | Celastraceae | <i>Parnassia</i> | <i>Parnassia farreri</i>       | wud03051         | JF977397 | JN045812 | JF942864 | JF954987 |
| Eudicotyledons | Celastraceae | <i>Parnassia</i> | <i>Parnassia farreri</i>       | Wud2319          | JF811062 | JF802332 | JF802240 | JF802427 |
| Eudicotyledons | Celastraceae | <i>Parnassia</i> | <i>Parnassia farreri</i>       | Wud126           | JF977395 | JN045811 | JF942862 | JF954985 |
| Eudicotyledons | Celastraceae | <i>Parnassia</i> | <i>Parnassia farreri</i>       | Wud03051         | JF977397 | JN045812 | JF942864 | JF954987 |
| Eudicotyledons | Celastraceae | <i>Parnassia</i> | <i>Parnassia farreri</i>       | wud2319          | JF811062 | JF802332 | JF802240 | JF802427 |
| Eudicotyledons | Celastraceae | <i>Parnassia</i> | <i>Parnassia faberi</i>        | wud02017         | JF977393 | JN045809 | JF942859 | JF954982 |
| Eudicotyledons | Celastraceae | <i>Parnassia</i> | <i>Parnassia faberi</i>        | Wud0901-2        | JF811058 | JF802328 | JF802236 | JF802423 |
| Eudicotyledons | Celastraceae | <i>Parnassia</i> | <i>Parnassia faberi</i>        | Wud0901-1        | JF811057 | JF802327 | JF802235 | JF802422 |
| Eudicotyledons | Celastraceae | <i>Parnassia</i> | <i>Parnassia faberi</i>        | Wud0907          | JF811059 | JF802329 | JF802237 | JF802424 |
| Eudicotyledons | Celastraceae | <i>Parnassia</i> | <i>Parnassia faberi</i>        | wud03013         | JF977392 | JN045808 | JF942858 | JF954981 |
| Eudicotyledons | Celastraceae | <i>Parnassia</i> | <i>Parnassia faberi</i>        | Wud02017         | JF977393 | JN045809 | JF942859 | JF954982 |
| Eudicotyledons | Celastraceae | <i>Parnassia</i> | <i>Parnassia faberi</i>        | Wud02013         | JF811054 | JF802324 | JF802233 | JF802419 |
| Eudicotyledons | Celastraceae | <i>Parnassia</i> | <i>Parnassia faberi</i>        | wud0901-2        | JF811058 | JF802328 | JF802236 | JF802423 |
| Eudicotyledons | Celastraceae | <i>Parnassia</i> | <i>Parnassia faberi</i>        | wud0901-1        | JF811057 | JF802327 | JF802235 | JF802422 |
| Eudicotyledons | Celastraceae | <i>Parnassia</i> | <i>Parnassia faberi</i>        | Wud03013         | JF977392 | JN045808 | JF942858 | JF954981 |
| Eudicotyledons | Celastraceae | <i>Parnassia</i> | <i>Parnassia esquirolii</i>    | Wud900 1         | JF811052 | JF802322 | JF802231 | JF802417 |
| Eudicotyledons | Celastraceae | <i>Parnassia</i> | <i>Parnassia esquirolii</i>    | Wud900 3         | JF811053 | JF802323 | JF802232 | JF802418 |
| Eudicotyledons | Celastraceae | <i>Parnassia</i> | <i>Parnassia epunctulata</i>   | wud1526          | JF977388 | JN045804 | JF942853 | JF954976 |
| Eudicotyledons | Celastraceae | <i>Parnassia</i> | <i>Parnassia epunctulata</i>   | Wud03890         | JF811050 | JF802320 | JF802229 | JF802415 |
| Eudicotyledons | Celastraceae | <i>Parnassia</i> | <i>Parnassia epunctulata</i>   | Wud1526          | JF977388 | JN045804 | JF942853 | JF954976 |
| Eudicotyledons | Celastraceae | <i>Parnassia</i> | <i>Parnassia epunctulata</i>   | wud03890         | JF811050 | JF802320 | JF802229 | JF802415 |
| Eudicotyledons | Celastraceae | <i>Parnassia</i> | <i>Parnassia dilatata</i>      | Wud020-10        | JF811047 | JF802317 | JF802226 | JF802412 |

|                |              |                   |                             |                           |          |          |          |          |
|----------------|--------------|-------------------|-----------------------------|---------------------------|----------|----------|----------|----------|
| Eudicotyledons | Celastraceae | <i>Parnassia</i>  | <i>Parnassia dilatata</i>   | Wud020-5                  | JF811049 | JF802319 | JF802228 | JF802414 |
| Eudicotyledons | Celastraceae | <i>Parnassia</i>  | <i>Parnassia dilatata</i>   | wud020-20                 | JF977386 | JN045802 | JF942851 | JF954974 |
| Eudicotyledons | Celastraceae | <i>Parnassia</i>  | <i>Parnassia dilatata</i>   | Wud020-20                 | JF977386 | JN045802 | JF942851 | JF954974 |
| Eudicotyledons | Celastraceae | <i>Parnassia</i>  | <i>Parnassia dilatata</i>   | wud020-5                  | JF811049 | JF802319 | JF802228 | JF802414 |
| Eudicotyledons | Celastraceae | <i>Parnassia</i>  | <i>Parnassia dilatata</i>   | wud020-10                 | JF811047 | JF802317 | JF802226 | JF802412 |
| Eudicotyledons | Celastraceae | <i>Parnassia</i>  | <i>Parnassia degenensis</i> | Wud05178                  | JF811046 | JF802316 | JF802225 | JF802411 |
| Eudicotyledons | Celastraceae | <i>Parnassia</i>  | <i>Parnassia degenensis</i> | Wud03064                  | JF811045 | JF802315 | JF802224 | JF802410 |
| Eudicotyledons | Celastraceae | <i>Parnassia</i>  | <i>Parnassia delavayi</i>   | Wud091522                 | JF811041 | JF802311 | JF802220 | JF802406 |
| Eudicotyledons | Celastraceae | <i>Parnassia</i>  | <i>Parnassia delavayi</i>   | wud127                    | JF977382 | JN045798 | JF942845 | JF954968 |
| Eudicotyledons | Celastraceae | <i>Parnassia</i>  | <i>Parnassia delavayi</i>   | Wud1553                   | JF811044 | JF802314 | JF802223 | JF802409 |
| Eudicotyledons | Celastraceae | <i>Parnassia</i>  | <i>Parnassia delavayi</i>   | wud1413                   | JF977381 | JN045797 | JF942844 | JF954967 |
| Eudicotyledons | Celastraceae | <i>Parnassia</i>  | <i>Parnassia delavayi</i>   | Wud127                    | JF977382 | JN045798 | JF942845 | JF954968 |
| Eudicotyledons | Celastraceae | <i>Parnassia</i>  | <i>Parnassia delavayi</i>   | wud1553                   | JF811044 | JF802314 | JF802223 | JF802409 |
| Eudicotyledons | Celastraceae | <i>Parnassia</i>  | <i>Parnassia delavayi</i>   | Wud02014                  | JF811040 | JF802310 | JF802219 | JF802405 |
| Eudicotyledons | Celastraceae | <i>Parnassia</i>  | <i>Parnassia delavayi</i>   | Wud1413                   | JF977381 | JN045797 | JF942844 | JF954967 |
| Eudicotyledons | Celastraceae | <i>Parnassia</i>  | <i>Parnassia brevistyla</i> | wud150                    | JF977371 | JN045786 | JF942833 | JF954958 |
| Eudicotyledons | Celastraceae | <i>Parnassia</i>  | <i>Parnassia brevistyla</i> | wud05051                  | JF977374 | JN045789 | JF942836 | JF954961 |
| Eudicotyledons | Celastraceae | <i>Parnassia</i>  | <i>Parnassia brevistyla</i> | wud1177                   | JF977373 | JN045788 | JF942835 | JF954960 |
| Eudicotyledons | Celastraceae | <i>Parnassia</i>  | <i>Parnassia brevistyla</i> | wud0091628                | JF977375 | JN045790 | JF942837 | JF954962 |
| Eudicotyledons | Celastraceae | <i>Parnassia</i>  | <i>Parnassia brevistyla</i> | wud1288                   | JF977372 | JN045787 | JF942834 | JF954959 |
| Eudicotyledons | Celastraceae | <i>Parnassia</i>  | <i>Parnassia asarifolia</i> | wud1027                   | JF977369 | JN045782 | JF942831 | JF954956 |
| Eudicotyledons | Celastraceae | <i>Parnassia</i>  | <i>Parnassia asarifolia</i> | PROP0816                  | JF811037 | JF802307 | JF802206 | JF802402 |
| Eudicotyledons | Celastraceae | <i>Parnassia</i>  | <i>Parnassia asarifolia</i> | Mcneilus VE1027           | JF811038 | JF802308 | JF802207 | JF802403 |
| Eudicotyledons | Celastraceae | <i>Parnassia</i>  | <i>Parnassia asarifolia</i> | wud7103                   | JF977368 | JN045781 | JF942830 | JF954955 |
| Eudicotyledons | Celastraceae | <i>Parnassia</i>  | <i>Parnassia asarifolia</i> | Lena Arrtz & Marlin PK 71 | JF811039 | JF802309 | JF802208 | JF802404 |
| Eudicotyledons | Celastraceae | <i>Parnassia</i>  | <i>Parnassia asarifolia</i> | wud0816                   | JF977370 | JN045783 | JF942832 | JF954957 |
| Eudicotyledons | Araliaceae   | <i>Panax</i>      | <i>Panax japonicus</i>      | J1(PE)                    | HQ112425 | HQ112873 | HQ11260  | HQ11306  |
| Eudicotyledons | Araliaceae   | <i>Panax</i>      | <i>Panax japonicus</i>      | PS1477MT04                | GQ434783 | GQ43540  | GQ43671  | GQ43427  |
| Eudicotyledons | Araliaceae   | <i>Panax</i>      | <i>Panax ginseng</i>        | PS1467MT01                | JF421520 | GQ43539  | GQ43670  | GQ43426  |
| Eudicotyledons | Araliaceae   | <i>Panax</i>      | <i>Panax ginseng</i>        | Zhou002(PE)               | HQ112416 | HQ112864 | HQ11259  | HQ11305  |
| Eudicotyledons | Polygonaceae | <i>Oxyria</i>     | <i>Oxyria sinensis</i>      | W26                       | JF977267 | JN045697 | JF942758 | JF954854 |
| Eudicotyledons | Polygonaceae | <i>Oxyria</i>     | <i>Oxyria sinensis</i>      | D189                      | JF977268 | JN045698 | JF942759 | JF954855 |
| Eudicotyledons | Polygonaceae | <i>Oxyria</i>     | <i>Oxyria digyna</i>        | D1229                     | JF977266 | JN045695 | JF942756 | JF954852 |
| Eudicotyledons | Polygonaceae | <i>Oxyria</i>     | <i>Oxyria digyna</i>        | D1354                     | JF977265 | JN045694 | JF942755 | JF954851 |
| Eudicotyledons | Polygonaceae | <i>Oxyria</i>     | <i>Oxyria digyna</i>        | W25                       | JF977262 | JN045690 | JF942751 | JF954847 |
| Eudicotyledons | Polygonaceae | <i>Oxyria</i>     | <i>Oxyria digyna</i>        | D2061                     | JF977263 | JN045692 | JF942753 | JF954849 |
| Eudicotyledons | Polygonaceae | <i>Oxyria</i>     | <i>Oxyria digyna</i>        | D1755                     | JF977264 | JN045693 | JF942754 | JF954850 |
| Eudicotyledons | Betulaceae   | <i>Ostryopsis</i> | <i>Ostryopsis nobilis</i>   | Ostryopsis07              | JF977258 | JN045686 | JF942747 | JF954843 |
| Eudicotyledons | Betulaceae   | <i>Ostryopsis</i> | <i>Ostryopsis nobilis</i>   | Ostryopsis02              | JF977261 | JN045689 | JF942750 | JF954846 |
| Eudicotyledons | Betulaceae   | <i>Ostryopsis</i> | <i>Ostryopsis nobilis</i>   | Ostryopsis03              | JF977260 | JN045688 | JF942749 | JF954845 |

|                |            |                   |                               |              |          |          |          |          |
|----------------|------------|-------------------|-------------------------------|--------------|----------|----------|----------|----------|
| Eudicotyledons | Betulaceae | <i>Ostryopsis</i> | <i>Ostryopsis nobilis</i>     | Ostryopsis10 | JF977257 | JN045685 | JF942746 | JF954842 |
| Eudicotyledons | Betulaceae | <i>Ostryopsis</i> | <i>Ostryopsis nobilis</i>     | Ostryopsis05 | JF977259 | JN045687 | JF942748 | JF954844 |
| Eudicotyledons | Betulaceae | <i>Ostryopsis</i> | <i>Ostryopsis intermedia</i>  | Ostryopsis01 | JF977256 | JN045684 | JF942745 | JF954841 |
| Eudicotyledons | Betulaceae | <i>Ostryopsis</i> | <i>Ostryopsis intermedia</i>  | Ostryopsis06 | JF977254 | JN045682 | JF942743 | JF954839 |
| Eudicotyledons | Betulaceae | <i>Ostryopsis</i> | <i>Ostryopsis intermedia</i>  | Ostryopsis09 | JF977252 | JN045680 | JF942741 | JF954837 |
| Eudicotyledons | Betulaceae | <i>Ostryopsis</i> | <i>Ostryopsis intermedia</i>  | Ostryopsis08 | JF977253 | JN045681 | JF942742 | JF954838 |
| Eudicotyledons | Betulaceae | <i>Ostryopsis</i> | <i>Ostryopsis intermedia</i>  | Ostryopsis04 | JF977255 | JN045683 | JF942744 | JF954840 |
| Eudicotyledons | Betulaceae | <i>Ostryopsis</i> | <i>Ostryopsis davidiana</i>   | Ostryopsis12 | JF977250 | JN045678 | JF942739 | JF954835 |
| Eudicotyledons | Betulaceae | <i>Ostryopsis</i> | <i>Ostryopsis davidiana</i>   | Ostryopsis13 | JF977249 | JN045677 | JF942738 | JF954834 |
| Eudicotyledons | Betulaceae | <i>Ostryopsis</i> | <i>Ostryopsis davidiana</i>   | Ostryopsis16 | JF977246 | JN045674 | JF942735 | JF954831 |
| Eudicotyledons | Betulaceae | <i>Ostryopsis</i> | <i>Ostryopsis davidiana</i>   | Ostryopsis18 | JF977244 | JN045672 | JF942733 | JF954829 |
| Eudicotyledons | Betulaceae | <i>Ostryopsis</i> | <i>Ostryopsis davidiana</i>   | Ostryopsis19 | JF977243 | JN045671 | JF942732 | JF954828 |
| Eudicotyledons | Betulaceae | <i>Ostryopsis</i> | <i>Ostryopsis davidiana</i>   | Ostryopsis14 | JF977248 | JN045676 | JF942737 | JF954833 |
| Eudicotyledons | Betulaceae | <i>Ostryopsis</i> | <i>Ostryopsis davidiana</i>   | Ostryopsis15 | JF977247 | JN045675 | JF942736 | JF954832 |
| Eudicotyledons | Betulaceae | <i>Ostryopsis</i> | <i>Ostryopsis davidiana</i>   | Ostryopsis17 | JF977245 | JN045673 | JF942734 | JF954830 |
| Eudicotyledons | Betulaceae | <i>Ostryopsis</i> | <i>Ostryopsis davidiana</i>   | Ostryopsis11 | JF977251 | JN045679 | JF942740 | JF954836 |
| Eudicotyledons | Betulaceae | <i>Ostryopsis</i> | <i>Ostryopsis davidiana</i>   | Ostryopsis20 | JF977242 | JN045670 | JF942731 | JF954827 |
| Eudicotyledons | Apiaceae   | <i>Osmorhiza</i>  | <i>Osmorhiza occidentalis</i> | PL4633       | JF977240 | JN045668 | JF942729 | JF954823 |
| Eudicotyledons | Apiaceae   | <i>Osmorhiza</i>  | <i>Osmorhiza occidentalis</i> | W7116-10     | JF977239 | JN045667 | JF942728 | JF954822 |
| Eudicotyledons | Apiaceae   | <i>Osmorhiza</i>  | <i>Osmorhiza occidentalis</i> | W7120-11     | JF977238 | JN045666 | JF942727 | JF954821 |
| Eudicotyledons | Apiaceae   | <i>Osmorhiza</i>  | <i>Osmorhiza occidentalis</i> | H5560        | JF977241 | JN045669 | JF942730 | JF954824 |
| Eudicotyledons | Apiaceae   | <i>Osmorhiza</i>  | <i>Osmorhiza longistylis</i>  | W7151-1      | JF977233 | JN045661 | JF942722 | JF954816 |
| Eudicotyledons | Apiaceae   | <i>Osmorhiza</i>  | <i>Osmorhiza longistylis</i>  | WH564        | JF977232 | JN045660 | JF942721 | JF954815 |
| Eudicotyledons | Apiaceae   | <i>Osmorhiza</i>  | <i>Osmorhiza longistylis</i>  | W5094-2      | JF977234 | JN045662 | JF942723 | JF954817 |
| Eudicotyledons | Apiaceae   | <i>Osmorhiza</i>  | <i>Osmorhiza glabrata</i>     | T2419        | JF977231 | JN045659 | JF942720 | JF954814 |
| Eudicotyledons | Apiaceae   | <i>Osmorhiza</i>  | <i>Osmorhiza glabrata</i>     | W7464-16     | JF977229 | JN045657 | JF942718 | JF954812 |
| Eudicotyledons | Apiaceae   | <i>Osmorhiza</i>  | <i>Osmorhiza glabrata</i>     | Wen7456      | JF977228 | JN045656 | JF942717 | JF954811 |
| Eudicotyledons | Apiaceae   | <i>Osmorhiza</i>  | <i>Osmorhiza glabrata</i>     | W7315        | JF977230 | JN045658 | JF942719 | JF954813 |
| Eudicotyledons | Apiaceae   | <i>Osmorhiza</i>  | <i>Osmorhiza depauperata</i>  | W10456-1     | JF977227 | JN045655 | JF942716 | JF954810 |
| Eudicotyledons | Apiaceae   | <i>Osmorhiza</i>  | <i>Osmorhiza depauperata</i>  | W4742        | JF977226 | JN045654 | JF942715 | JF954809 |
| Eudicotyledons | Apiaceae   | <i>Osmorhiza</i>  | <i>Osmorhiza depauperata</i>  | W7387        | JF977225 | JN045653 | JF942714 | JF954808 |
| Eudicotyledons | Apiaceae   | <i>Osmorhiza</i>  | <i>Osmorhiza depauperata</i>  | W7415        | JF977224 | JN045652 | JF942713 | JF954807 |
| Eudicotyledons | Apiaceae   | <i>Osmorhiza</i>  | <i>Osmorhiza claytonii</i>    | W7139-2      | JF977223 | JN045651 | JF942712 | JF954806 |
| Eudicotyledons | Apiaceae   | <i>Osmorhiza</i>  | <i>Osmorhiza claytonii</i>    | Wen7300      | JF977222 | JN045650 | JF942711 | JF954805 |
| Eudicotyledons | Apiaceae   | <i>Osmorhiza</i>  | <i>Osmorhiza brachypoda</i>   | W7114        | JF977221 | JN045649 | JF942710 | JF954804 |
| Eudicotyledons | Apiaceae   | <i>Osmorhiza</i>  | <i>Osmorhiza brachypoda</i>   | W7122        | JF977220 | JN045648 | JF942709 | JF954803 |
| Eudicotyledons | Apiaceae   | <i>Osmorhiza</i>  | <i>Osmorhiza berteroi</i>     | W7374        | JF977217 | JN045643 | JF942703 | JF954797 |
| Eudicotyledons | Apiaceae   | <i>Osmorhiza</i>  | <i>Osmorhiza berteroi</i>     | Wen4732      | JF977216 | JN045642 | JF942702 | JF954796 |
| Eudicotyledons | Apiaceae   | <i>Osmorhiza</i>  | <i>Osmorhiza berteroi</i>     | Wen7397      | JF977215 | JN045641 | JF942701 | JF954795 |
| Eudicotyledons | Apiaceae   | <i>Osmorhiza</i>  | <i>Osmorhiza berteroi</i>     | W10465       | JF977218 | JN045646 | JF942706 | JF954800 |



|                |              |                    |                                 |             |          |          |          |          |
|----------------|--------------|--------------------|---------------------------------|-------------|----------|----------|----------|----------|
| Eudicotyledons | Apiaceae     | <i>Osmorhiza</i>   | <i>Osmorhiza aristata</i>       | Lee-Han     | JF977214 | JN045640 | JF942700 | JF954794 |
| Eudicotyledons | Apiaceae     | <i>Osmorhiza</i>   | <i>Osmorhiza aristata</i>       | W5722-2     | JF977213 | JN045639 | JF942699 | JF954793 |
| Eudicotyledons | Apiaceae     | <i>Osmorhiza</i>   | <i>Osmorhiza aristata</i>       | W8500       | JF977212 | JN045638 | JF942698 | JF954792 |
| Eudicotyledons | Rubiaceae    | <i>Oldenlandia</i> | <i>Oldenlandia tenuipes</i>     | WRJ1234-1   | JF976508 | JN044788 | JF941806 | JF953919 |
| Eudicotyledons | Rubiaceae    | <i>Oldenlandia</i> | <i>Oldenlandia tenuipes</i>     | WRJ1234-2   | JF976507 | JN044787 | JF941805 | JF953918 |
| Eudicotyledons | Rubiaceae    | <i>Oldenlandia</i> | <i>Oldenlandia tenelliflora</i> | WRJ0992     | JF976505 | JN044785 | JF941803 | JF953916 |
| Eudicotyledons | Rubiaceae    | <i>Oldenlandia</i> | <i>Oldenlandia tenelliflora</i> | WRJ0012     | JF976506 | JN044786 | JF941804 | JF953917 |
| Eudicotyledons | Rubiaceae    | <i>Oldenlandia</i> | <i>Oldenlandia ovatifolia</i>   | WRJ0020-2   | JF976497 | JN044777 | JF941795 | JF953908 |
| Eudicotyledons | Rubiaceae    | <i>Oldenlandia</i> | <i>Oldenlandia ovatifolia</i>   | WRJ0020-1   | JF976498 | JN044778 | JF941796 | JF953909 |
| Eudicotyledons | Rubiaceae    | <i>Oldenlandia</i> | <i>Oldenlandia corymbosa</i>    | WRJ0050     | JF976491 | JN044771 | JF941789 | JF953902 |
| Eudicotyledons | Rubiaceae    | <i>Oldenlandia</i> | <i>Oldenlandia corymbosa</i>    | WRJ0016     | JF976492 | JN044772 | JF941790 | JF953903 |
| Eudicotyledons | Rubiaceae    | <i>Oldenlandia</i> | <i>Oldenlandia chrysotricha</i> | WRJ1230     | JF976488 | JN044768 | JF941786 | JF953901 |
| Eudicotyledons | Rubiaceae    | <i>Oldenlandia</i> | <i>Oldenlandia chrysotricha</i> | WRJCXX001   | JF976487 | JN044767 | JF941785 | JF953900 |
| Eudicotyledons | Rubiaceae    | <i>Oldenlandia</i> | <i>Oldenlandia bodinieri</i>    | WRJ1247     | JF976482 | JN044762 | JF941780 | JF953895 |
| Eudicotyledons | Rubiaceae    | <i>Oldenlandia</i> | <i>Oldenlandia bodinieri</i>    | WRJ1253-1   | JF976481 | JN044761 | JF941779 | JF953894 |
| Eudicotyledons | Rubiaceae    | <i>Oldenlandia</i> | <i>Oldenlandia bodinieri</i>    | WRJ1253-2   | JF976480 | JN044760 | JF941778 | JF953893 |
| Eudicotyledons | Cornaceae    | <i>Nyssa</i>       | <i>Nyssa sylvatica</i>          | zhangcq0087 | JF977172 | JN045595 | JF942654 | JF954748 |
| Eudicotyledons | Cornaceae    | <i>Nyssa</i>       | <i>Nyssa sylvatica</i>          | zhangcq0088 | JF977171 | JN045594 | JF942653 | JF954747 |
| Eudicotyledons | Cornaceae    | <i>Nyssa</i>       | <i>Nyssa sinensis</i>           | zhangcq0089 | JF977170 | JN045593 | JF942652 | JF954746 |
| Eudicotyledons | Cornaceae    | <i>Nyssa</i>       | <i>Nyssa sinensis</i>           | zhangcq0090 | JF977169 | JN045592 | JF942651 | JF954745 |
| Eudicotyledons | Cornaceae    | <i>Nyssa</i>       | <i>Nyssa shangszeensis</i>      | zhangcq0096 | JF977168 | JN045588 | JF942646 | JF954740 |
| Eudicotyledons | Cornaceae    | <i>Nyssa</i>       | <i>Nyssa shangszeensis</i>      | zhangcq0098 | JF977167 | JN045587 | JF942645 | JF954739 |
| Eudicotyledons | Nitrariaceae | <i>Nitraria</i>    | <i>Nitraria sibirica</i>        | D455        | JF977164 | JN045581 | JF942637 | JF954731 |
| Eudicotyledons | Nitrariaceae | <i>Nitraria</i>    | <i>Nitraria sibirica</i>        | D454        | JF977165 | JN045582 | JF942638 | JF954732 |
| Eudicotyledons | Nitrariaceae | <i>Nitraria</i>    | <i>Nitraria sibirica</i>        | D1164       | JF977166 | JN045583 | JF942639 | JF954733 |
| Eudicotyledons | Nitrariaceae | <i>Nitraria</i>    | <i>Nitraria roborowskii</i>     | D1575       | JF977163 | JN045580 | JF942636 | JF954730 |
| Eudicotyledons | Nitrariaceae | <i>Nitraria</i>    | <i>Nitraria roborowskii</i>     | D453        | JF977162 | JN045579 | JF942635 | JF954729 |
| Eudicotyledons | Rubiaceae    | <i>Mussaenda</i>   | <i>Mussaenda treutleri</i>      | ZDX044      | JF977129 | JN045534 | JF942590 | JF954682 |
| Eudicotyledons | Rubiaceae    | <i>Mussaenda</i>   | <i>Mussaenda treutleri</i>      | ZDX045      | JF977128 | JN045533 | JF942589 | JF954681 |
| Eudicotyledons | Rubiaceae    | <i>Mussaenda</i>   | <i>Mussaenda pubescens</i>      | ZDX006      | JF977118 | JN045522 | JF942578 | JF954670 |
| Eudicotyledons | Rubiaceae    | <i>Mussaenda</i>   | <i>Mussaenda pubescens</i>      | ZDX004      | JF977120 | JN045524 | JF942580 | JF954672 |
| Eudicotyledons | Rubiaceae    | <i>Mussaenda</i>   | <i>Mussaenda pubescens</i>      | ZDX005      | JF977119 | JN045523 | JF942579 | JF954671 |
| Eudicotyledons | Rubiaceae    | <i>Mussaenda</i>   | <i>Mussaenda pubescens</i>      | ZDX007      | JF977117 | JN045521 | JF942577 | JF954669 |
| Eudicotyledons | Rubiaceae    | <i>Mussaenda</i>   | <i>Mussaenda pubescens</i>      | ZDX001      | JF977123 | JN045527 | JF942583 | JF954675 |
| Eudicotyledons | Rubiaceae    | <i>Mussaenda</i>   | <i>Mussaenda pubescens</i>      | ZDX002      | JF977122 | JN045526 | JF942582 | JF954674 |
| Eudicotyledons | Rubiaceae    | <i>Mussaenda</i>   | <i>Mussaenda pubescens</i>      | ZDX003      | JF977121 | JN045525 | JF942581 | JF954673 |
| Eudicotyledons | Rubiaceae    | <i>Mussaenda</i>   | <i>Mussaenda pubescens</i>      | ZDX008      | JF977116 | JN045520 | JF942576 | JF954668 |
| Eudicotyledons | Rubiaceae    | <i>Mussaenda</i>   | <i>Mussaenda macrophylla</i>    | ZDX027      | JF977113 | JN045517 | JF942573 | JF954664 |
| Eudicotyledons | Rubiaceae    | <i>Mussaenda</i>   | <i>Mussaenda macrophylla</i>    | ZDX028      | JF977112 | JN045516 | JF942572 | JF954663 |
| Eudicotyledons | Rubiaceae    | <i>Mussaenda</i>   | <i>Mussaenda laxiflora</i>      | ZDX024      | JF977111 | JN045514 | JF942570 | JF954661 |

|                |                |                  |                                 |           |          |          |          |          |
|----------------|----------------|------------------|---------------------------------|-----------|----------|----------|----------|----------|
| Eudicotyledons | Rubiaceae      | <i>Mussaenda</i> | <i>Mussaenda laxiflora</i>      | ZDX025    | JF977110 | JN045513 | JF942569 | JF954660 |
| Eudicotyledons | Rubiaceae      | <i>Mussaenda</i> | <i>Mussaenda kwangtungensis</i> | ZDX021    | JF977108 | JN045510 | JF942566 | JF954657 |
| Eudicotyledons | Rubiaceae      | <i>Mussaenda</i> | <i>Mussaenda kwangtungensis</i> | ZDX020    | JF977109 | JN045511 | JF942567 | JF954658 |
| Eudicotyledons | Rubiaceae      | <i>Mussaenda</i> | <i>Mussaenda hossei</i>         | ZDX017    | JF977106 | JN045508 | JF942565 | JF954656 |
| Eudicotyledons | Rubiaceae      | <i>Mussaenda</i> | <i>Mussaenda hossei</i>         | ZDX018    | JF977105 | JN045507 | JF942564 | JF954655 |
| Eudicotyledons | Rubiaceae      | <i>Mussaenda</i> | <i>Mussaenda divaricata</i>     | ZDX015    | JF977103 | JN045501 | JF942558 | JF954649 |
| Eudicotyledons | Rubiaceae      | <i>Mussaenda</i> | <i>Mussaenda divaricata</i>     | ZDX016    | JF977102 | JN045500 | JF942557 | JF954648 |
| Eudicotyledons | Rubiaceae      | <i>Mussaenda</i> | <i>Mussaenda divaricata</i>     | ZDX014    | JF977104 | JN045502 | JF942559 | JF954650 |
| Eudicotyledons | Rubiaceae      | <i>Morinda</i>   | <i>Morinda umbellata</i>        | ZDX050    | JF977056 | JN045495 | JF942552 | JF954643 |
| Eudicotyledons | Rubiaceae      | <i>Morinda</i>   | <i>Morinda umbellata</i>        | ZDX049    | JF977057 | JN045496 | JF942553 | JF954644 |
| Eudicotyledons | Rubiaceae      | <i>Morinda</i>   | <i>Morinda umbellata</i>        | ZDX051    | JF977055 | JN045494 | JF942551 | JF954642 |
| Eudicotyledons | Rubiaceae      | <i>Morinda</i>   | <i>Morinda officinalis</i>      | ZDX056    | JF977047 | JN045486 | JF942543 | JF954634 |
| Eudicotyledons | Rubiaceae      | <i>Morinda</i>   | <i>Morinda officinalis</i>      | ZDX055    | JF977048 | JN045487 | JF942544 | JF954635 |
| Eudicotyledons | Rubiaceae      | <i>Morinda</i>   | <i>Morinda officinalis</i>      | ZDX054    | JF977049 | JN045488 | JF942545 | JF954636 |
| Eudicotyledons | Rubiaceae      | <i>Morinda</i>   | <i>Morinda hainanensis</i>      | ZDX062    | JF977044 | JN045483 | JF942540 | JF954631 |
| Eudicotyledons | Rubiaceae      | <i>Morinda</i>   | <i>Morinda hainanensis</i>      | ZDX061    | JF977045 | JN045484 | JF942541 | JF954632 |
| Eudicotyledons | Rubiaceae      | <i>Morinda</i>   | <i>Morinda hainanensis</i>      | ZDX060    | JF977046 | JN045485 | JF942542 | JF954633 |
| Eudicotyledons | Rubiaceae      | <i>Morinda</i>   | <i>Morinda callicarpifolia</i>  | ZDX068    | JF977043 | JN045482 | JF942539 | JF954630 |
| Eudicotyledons | Rubiaceae      | <i>Morinda</i>   | <i>Morinda callicarpifolia</i>  | ZDX069    | JF977042 | JN045481 | JF942538 | JF954629 |
| Eudicotyledons | Rubiaceae      | <i>Morinda</i>   | <i>Morinda badia</i>            | ZDX067    | JF977040 | JN045476 | JF942533 | JF954624 |
| Eudicotyledons | Rubiaceae      | <i>Morinda</i>   | <i>Morinda badia</i>            | ZDX066    | JF977041 | JN045477 | JF942534 | JF954625 |
| Eudicotyledons | Rubiaceae      | <i>Luculia</i>   | <i>Luculia yunnanensis</i>      | Zhouw0001 | JF976883 | JN045281 | JF942333 | JF954419 |
| Eudicotyledons | Rubiaceae      | <i>Luculia</i>   | <i>Luculia yunnanensis</i>      | Zhouw0002 | JF976882 | JN045280 | JF942332 | JF954418 |
| Eudicotyledons | Rubiaceae      | <i>Luculia</i>   | <i>Luculia yunnanensis</i>      | Zhouw0004 | JF976880 | JN045278 | JF942330 | JF954416 |
| Eudicotyledons | Rubiaceae      | <i>Luculia</i>   | <i>Luculia yunnanensis</i>      | Zhouw0005 | JF976879 | JN045277 | JF942329 | JF954415 |
| Eudicotyledons | Rubiaceae      | <i>Luculia</i>   | <i>Luculia yunnanensis</i>      | Zhouw0003 | JF976881 | JN045279 | JF942331 | JF954417 |
| Eudicotyledons | Rubiaceae      | <i>Luculia</i>   | <i>Luculia pinceana</i>         | Zhouw0009 | JF976871 | JN045269 | JF942321 | JF954407 |
| Eudicotyledons | Rubiaceae      | <i>Luculia</i>   | <i>Luculia pinceana</i>         | Zhouw0010 | JF976870 | JN045268 | JF942320 | JF954406 |
| Eudicotyledons | Rubiaceae      | <i>Luculia</i>   | <i>Luculia pinceana</i>         | Zhouw0008 | JF976872 | JN045270 | JF942322 | JF954408 |
| Eudicotyledons | Rubiaceae      | <i>Luculia</i>   | <i>Luculia pinceana</i>         | Zhouw0007 | JF976873 | JN045271 | JF942323 | JF954409 |
| Eudicotyledons | Rubiaceae      | <i>Luculia</i>   | <i>Luculia pinceana</i>         | Zhouw0011 | JF976869 | JN045267 | JF942319 | JF954405 |
| Eudicotyledons | Caprifoliaceae | <i>Lonicera</i>  | <i>Lonicera rupicola</i>        | Z288      | JF976868 | JN045258 | JF942310 | JF954401 |
| Eudicotyledons | Caprifoliaceae | <i>Lonicera</i>  | <i>Lonicera rupicola</i>        | Z291      | JF976866 | JN045255 | JF942307 | JF954398 |
| Eudicotyledons | Caprifoliaceae | <i>Lonicera</i>  | <i>Lonicera rupicola</i>        | Z290      | JF976867 | JN045256 | JF942308 | JF954399 |
| Eudicotyledons | Caprifoliaceae | <i>Lonicera</i>  | <i>Lonicera hispida</i>         | D1947     | JF976864 | JN045249 | JF942301 | JF954393 |
| Eudicotyledons | Caprifoliaceae | <i>Lonicera</i>  | <i>Lonicera hispida</i>         | Z281      | JF976863 | JN045248 | JF942300 | JF954392 |
| Eudicotyledons | Caprifoliaceae | <i>Lonicera</i>  | <i>Lonicera hispida</i>         | Z282      | JF976862 | JN045247 | JF942299 | JF954391 |
| Eudicotyledons | Caprifoliaceae | <i>Lonicera</i>  | <i>Lonicera hispida</i>         | Z283      | JF976861 | JN045246 | JF942298 | JF954390 |
| Eudicotyledons | Oleaceae       | <i>Ligustrum</i> | <i>Ligustrum xingrenense</i>    | OLgz_031  | JF830335 | JF830292 | JF830443 | JF830520 |
| Eudicotyledons | Oleaceae       | <i>Ligustrum</i> | <i>Ligustrum xingrenense</i>    | OLgz_025  | JF830337 | JF830291 | JF830442 | JF830519 |

|                |          |                  |                               |                 |          |          |          |          |
|----------------|----------|------------------|-------------------------------|-----------------|----------|----------|----------|----------|
| Eudicotyledons | Oleaceae | <i>Ligustrum</i> | <i>Ligustrum xingrenense</i>  | OLgz_021        | JF830336 | JF830293 | JF830444 | JF830521 |
| Eudicotyledons | Oleaceae | <i>Ligustrum</i> | <i>Ligustrum</i>              | OL_0803         | JF830400 | JF830269 | JF830420 | JF830497 |
| Eudicotyledons | Oleaceae | <i>Ligustrum</i> | <i>Ligustrum</i>              | QYLIST_01       | JF830401 | JF830267 | JF830418 | JF830495 |
| Eudicotyledons | Oleaceae | <i>Ligustrum</i> | <i>Ligustrum</i>              | QYLIST_02       | JF830402 | JF830268 | JF830419 | JF830496 |
| Eudicotyledons | Oleaceae | <i>Ligustrum</i> | <i>Ligustrum sempervirens</i> | Ye & Liu 455-1  | JF830381 | JF830259 | JF830410 | JF830488 |
| Eudicotyledons | Oleaceae | <i>Ligustrum</i> | <i>Ligustrum sempervirens</i> | Ye & Liu 455-2  | JF830383 | JF830258 | JF830409 | JF830487 |
| Eudicotyledons | Oleaceae | <i>Ligustrum</i> | <i>Ligustrum sempervirens</i> | Ye & Liu 455-3  | JF830382 | JF830260 | JF830411 | JF830489 |
| Eudicotyledons | Oleaceae | <i>Ligustrum</i> | <i>Ligustrum robustum</i>     | IMDXPG1602      | JF976854 | JN045239 | JF942293 | JF954385 |
| Eudicotyledons | Oleaceae | <i>Ligustrum</i> | <i>Ligustrum robustum</i>     | IMDXPG1603      | JF976853 | JN045238 | JF942292 | JF954384 |
| Eudicotyledons | Oleaceae | <i>Ligustrum</i> | <i>Ligustrum robustum</i>     | IMDXPG1601      | JF976855 | JN045240 | JF942294 | JF954386 |
| Eudicotyledons | Oleaceae | <i>Ligustrum</i> | <i>Ligustrum qiuhou</i>       | Dong & Ren 0139 | JF830357 | JF830275 | JF830426 | JF830503 |
| Eudicotyledons | Oleaceae | <i>Ligustrum</i> | <i>Ligustrum qiuhou</i>       | Chen 20100001   | JF830358 | JF830270 | JF830421 | JF830498 |
| Eudicotyledons | Oleaceae | <i>Ligustrum</i> | <i>Ligustrum qiuhou</i>       | QYLIQU_01       | JF830355 | JF830271 | JF830422 | JF830499 |
| Eudicotyledons | Oleaceae | <i>Ligustrum</i> | <i>Ligustrum qiuhou</i>       | QYLIQU_02       | JF830354 | JF830272 | JF830423 | JF830500 |
| Eudicotyledons | Oleaceae | <i>Ligustrum</i> | <i>Ligustrum qiuhou</i>       | PS0977MT01      | GQ434621 | GQ43522  | GQ43654  | GQ43417  |
| Eudicotyledons | Oleaceae | <i>Ligustrum</i> | <i>Ligustrum ovalifolium</i>  | OLlgs_003       | JF830390 | JF830305 | JF830456 | JF830533 |
| Eudicotyledons | Oleaceae | <i>Ligustrum</i> | <i>Ligustrum ovalifolium</i>  | OLOV_12         | JF830394 | JF830312 | JF830463 | JF830540 |
| Eudicotyledons | Oleaceae | <i>Ligustrum</i> | <i>Ligustrum ovalifolium</i>  | OLOV_09         | JF830393 | JF830309 | JF830460 | JF830537 |
| Eudicotyledons | Oleaceae | <i>Ligustrum</i> | <i>Ligustrum ovalifolium</i>  | Chen 2010036    | JF830396 | JF830307 | JF830458 | JF830535 |
| Eudicotyledons | Oleaceae | <i>Ligustrum</i> | <i>Ligustrum ovalifolium</i>  | QYLIOV_04       | JF830392 | JF830304 | JF830455 | JF830532 |
| Eudicotyledons | Oleaceae | <i>Ligustrum</i> | <i>Ligustrum ovalifolium</i>  | QYLIOV_02       | JF830391 | JF830306 | JF830457 | JF830534 |
| Eudicotyledons | Oleaceae | <i>Ligustrum</i> | <i>Ligustrum ovalifolium</i>  | QYLIOV_03       | JF830388 | JF830310 | JF830461 | JF830538 |
| Eudicotyledons | Oleaceae | <i>Ligustrum</i> | <i>Ligustrum lucidum</i>      | IMDXPG1501      | JF976848 | JN045229 | JF942289 | JF954378 |
| Eudicotyledons | Oleaceae | <i>Ligustrum</i> | <i>Ligustrum lucidum</i>      | IMDXPG1503      | JF976846 | JN045227 | JF942287 | JF954376 |
| Eudicotyledons | Oleaceae | <i>Ligustrum</i> | <i>Ligustrum lucidum</i>      | IMDXPG1502      | JF976847 | JN045228 | JF942288 | JF954377 |
| Eudicotyledons | Oleaceae | <i>Ligustrum</i> | <i>Ligustrum lucidum</i>      | OLLU_012        | JF830345 | JF830331 | JF830482 | JF830558 |
| Eudicotyledons | Oleaceae | <i>Ligustrum</i> | <i>Ligustrum lucidum</i>      | OLLU_011        | JF830344 | JF830327 | JF830478 | JF830554 |
| Eudicotyledons | Oleaceae | <i>Ligustrum</i> | <i>Ligustrum lucidum</i>      | OLLU_005        | JF830343 | JF830332 | JF830483 | JF830559 |
| Eudicotyledons | Oleaceae | <i>Ligustrum</i> | <i>Ligustrum lucidum</i>      | OLLU_004        | JF830347 | JF830329 | JF830480 | JF830556 |
| Eudicotyledons | Oleaceae | <i>Ligustrum</i> | <i>Ligustrum lucidum</i>      | OLLU_001        | JF830341 | JF830333 | JF830484 | JF830560 |
| Eudicotyledons | Oleaceae | <i>Ligustrum</i> | <i>Ligustrum lucidum</i>      | OLLU_003        | JF830346 | JF830328 | JF830479 | JF830555 |
| Eudicotyledons | Oleaceae | <i>Ligustrum</i> | <i>Ligustrum lucidum</i>      | OLLU_009        | JF830342 | JF830330 | JF830481 | JF830557 |
| Eudicotyledons | Oleaceae | <i>Ligustrum</i> | <i>Ligustrum japonicum</i>    | OLJA_010        | JF830405 | JF830326 | JF830477 | JF830553 |
| Eudicotyledons | Oleaceae | <i>Ligustrum</i> | <i>Ligustrum japonicum</i>    | OLJA_013        | JF830403 | JF830322 | JF830473 | JF830550 |
| Eudicotyledons | Oleaceae | <i>Ligustrum</i> | <i>Ligustrum japonicum</i>    | OLJA_008        | JF830406 | JF830323 | JF830474 | JF830551 |
| Eudicotyledons | Oleaceae | <i>Ligustrum</i> | <i>Ligustrum japonicum</i>    | OLJA_005        | JF830407 | JF830324 | JF830475 | JF830552 |
| Eudicotyledons | Oleaceae | <i>Ligustrum</i> | <i>Ligustrum henryi</i>       | QYLIHE_007      | JF830373 | JF830266 | JF830417 | JF830494 |
| Eudicotyledons | Oleaceae | <i>Ligustrum</i> | <i>Ligustrum henryi</i>       | IMDXPG2203      | JF976842 | JN045222 | JF942284 | JF954373 |
| Eudicotyledons | Oleaceae | <i>Ligustrum</i> | <i>Ligustrum henryi</i>       | IMDXPG2202      | JF976843 | JN045223 | JF942285 | JF954374 |
| Eudicotyledons | Oleaceae | <i>Ligustrum</i> | <i>Ligustrum henryi</i>       | QYLIHE_001      | JF830372 | JF830265 | JF830416 | JF830493 |

|                |            |                  |                               |              |          |          |          |          |
|----------------|------------|------------------|-------------------------------|--------------|----------|----------|----------|----------|
| Eudicotyledons | Oleaceae   | <i>Ligustrum</i> | <i>Ligustrum henryi</i>       | QYLIHE_003   | JF830371 | JF830263 | JF830414 | JF830491 |
| Eudicotyledons | Oleaceae   | <i>Ligustrum</i> | <i>Ligustrum henryi</i>       | QYLIHE_005   | JF830374 | JF830262 | JF830413 | JF830490 |
| Eudicotyledons | Oleaceae   | <i>Ligustrum</i> | <i>Ligustrum henryi</i>       | QYLIHE_004   | JF830375 | JF830264 | JF830415 | JF830492 |
| Eudicotyledons | Oleaceae   | <i>Ligustrum</i> | <i>Ligustrum gracile</i>      | OL_0301      | JF830348 | JF830316 | JF830467 | JF830544 |
| Eudicotyledons | Oleaceae   | <i>Ligustrum</i> | <i>Ligustrum gracile</i>      | OL_0304      | JF830350 | JF830318 | JF830469 | JF830546 |
| Eudicotyledons | Oleaceae   | <i>Ligustrum</i> | <i>Ligustrum gracile</i>      | Ye & Liu_509 | JF830349 | JF830317 | JF830468 | JF830545 |
| Eudicotyledons | Oleaceae   | <i>Ligustrum</i> | <i>Ligustrum expansum</i>     | OLyc_124     | JF830359 | JF830279 | JF830430 | JF830507 |
| Eudicotyledons | Oleaceae   | <i>Ligustrum</i> | <i>Ligustrum expansum</i>     | OLhn_007     | JF830360 | JF830280 | JF830431 | JF830508 |
| Eudicotyledons | Oleaceae   | <i>Ligustrum</i> | <i>Ligustrum expansum</i>     | OLhn_001     | JF830361 | JF830281 | JF830432 | JF830509 |
| Eudicotyledons | Oleaceae   | <i>Ligustrum</i> | <i>Ligustrum delavayanum</i>  | OLlgs_001    | JF830384 | JF830294 | JF830445 | JF830522 |
| Eudicotyledons | Oleaceae   | <i>Ligustrum</i> | <i>Ligustrum delavayanum</i>  | OLjfs_045    | JF830386 | JF830295 | JF830446 | JF830523 |
| Eudicotyledons | Oleaceae   | <i>Ligustrum</i> | <i>Ligustrum delavayanum</i>  | OL_2110      | JF830385 | JF830297 | JF830448 | JF830525 |
| Eudicotyledons | Oleaceae   | <i>Ligustrum</i> | <i>Ligustrum delavayanum</i>  | OL_2108      | JF830387 | JF830296 | JF830447 | JF830524 |
| Eudicotyledons | Oleaceae   | <i>Ligustrum</i> | <i>Ligustrum confusum</i>     | OLyn_119     | JF830353 | JF830278 | JF830429 | JF830506 |
| Eudicotyledons | Oleaceae   | <i>Ligustrum</i> | <i>Ligustrum confusum</i>     | OLlj_046     | JF830351 | JF830276 | JF830427 | JF830504 |
| Eudicotyledons | Oleaceae   | <i>Ligustrum</i> | <i>Ligustrum confusum</i>     | OLyn_108     | JF830352 | JF830277 | JF830428 | JF830505 |
| Eudicotyledons | Asteraceae | <i>Ligularia</i> | <i>Ligularia virgaurea</i>    | PG090939     | JF976840 | JN045219 | JF942283 | JF954372 |
| Eudicotyledons | Asteraceae | <i>Ligularia</i> | <i>Ligularia virgaurea</i>    | PG090960     | JF976838 | JN045217 | JF942281 | JF954370 |
| Eudicotyledons | Asteraceae | <i>Ligularia</i> | <i>Ligularia virgaurea</i>    | PG090954     | JF976839 | JN045218 | JF942282 | JF954371 |
| Eudicotyledons | Asteraceae | <i>Ligularia</i> | <i>Ligularia virgaurea</i>    | PG090966     | JF976837 | JN045216 | JF942280 | JF954369 |
| Eudicotyledons | Asteraceae | <i>Ligularia</i> | <i>Ligularia vellea</i>       | PG090914     | JF976835 | JN045214 | JF942278 | JF954367 |
| Eudicotyledons | Asteraceae | <i>Ligularia</i> | <i>Ligularia vellea</i>       | PG090911     | JF976836 | JN045215 | JF942279 | JF954368 |
| Eudicotyledons | Asteraceae | <i>Ligularia</i> | <i>Ligularia vellea</i>       | PG090932     | JF976834 | JN045213 | JF942277 | JF954366 |
| Eudicotyledons | Asteraceae | <i>Ligularia</i> | <i>Ligularia tongolensis</i>  | PG090949     | JF976831 | JN045210 | JF942274 | JF954363 |
| Eudicotyledons | Asteraceae | <i>Ligularia</i> | <i>Ligularia tongolensis</i>  | PG090965     | JF976830 | JN045209 | JF942273 | JF954362 |
| Eudicotyledons | Asteraceae | <i>Ligularia</i> | <i>Ligularia tongolensis</i>  | PG090906     | JF976833 | JN045212 | JF942276 | JF954365 |
| Eudicotyledons | Asteraceae | <i>Ligularia</i> | <i>Ligularia subspicata</i>   | PG090981     | JF976824 | JN045203 | JF942267 | JF954356 |
| Eudicotyledons | Asteraceae | <i>Ligularia</i> | <i>Ligularia subspicata</i>   | PG090959     | JF976826 | JN045205 | JF942269 | JF954358 |
| Eudicotyledons | Asteraceae | <i>Ligularia</i> | <i>Ligularia subspicata</i>   | PG090972     | JF976825 | JN045204 | JF942268 | JF954357 |
| Eudicotyledons | Asteraceae | <i>Ligularia</i> | <i>Ligularia subspicata</i>   | PG090912     | JF976829 | JN045208 | JF942272 | JF954361 |
| Eudicotyledons | Asteraceae | <i>Ligularia</i> | <i>Ligularia subspicata</i>   | PG090938     | JF976827 | JN045206 | JF942270 | JF954359 |
| Eudicotyledons | Asteraceae | <i>Ligularia</i> | <i>Ligularia subspicata</i>   | PG090925     | JF976828 | JN045207 | JF942271 | JF954360 |
| Eudicotyledons | Asteraceae | <i>Ligularia</i> | <i>Ligularia pleurocaulis</i> | PG090958     | JF976822 | JN045201 | JF942265 | JF954354 |
| Eudicotyledons | Asteraceae | <i>Ligularia</i> | <i>Ligularia pleurocaulis</i> | PG090940     | JF976823 | JN045202 | JF942266 | JF954355 |
| Eudicotyledons | Asteraceae | <i>Ligularia</i> | <i>Ligularia dictyoneura</i>  | PG090968     | JF976814 | JN045189 | JF942253 | JF954342 |
| Eudicotyledons | Asteraceae | <i>Ligularia</i> | <i>Ligularia dictyoneura</i>  | PG090922     | JF976815 | JN045191 | JF942255 | JF954344 |
| Eudicotyledons | Asteraceae | <i>Ligularia</i> | <i>Ligularia cymbulifera</i>  | PG090937     | JF976810 | JN045185 | JF942249 | JF954338 |
| Eudicotyledons | Asteraceae | <i>Ligularia</i> | <i>Ligularia cymbulifera</i>  | PG090975     | JF976807 | JN045182 | JF942246 | JF954335 |
| Eudicotyledons | Asteraceae | <i>Ligularia</i> | <i>Ligularia cymbulifera</i>  | PG090915     | JF976812 | JN045187 | JF942251 | JF954340 |
| Eudicotyledons | Asteraceae | <i>Ligularia</i> | <i>Ligularia cymbulifera</i>  | PG090910     | JF976813 | JN045188 | JF942252 | JF954341 |

|                |               |                    |                                 |          |          |          |          |          |
|----------------|---------------|--------------------|---------------------------------|----------|----------|----------|----------|----------|
| Eudicotyledons | Asteraceae    | <i>Ligularia</i>   | <i>Ligularia cymbulifera</i>    | PG090936 | JF976811 | JN045186 | JF942250 | JF954339 |
| Eudicotyledons | Asteraceae    | <i>Ligularia</i>   | <i>Ligularia cymbulifera</i>    | PG090962 | JF976808 | JN045183 | JF942247 | JF954336 |
| Eudicotyledons | Rubiaceae     | <i>Leptodermis</i> | <i>Leptodermis vestita</i>      | WRJ1120C | JF976805 | JN045178 | JF942242 | JF954331 |
| Eudicotyledons | Rubiaceae     | <i>Leptodermis</i> | <i>Leptodermis vestita</i>      | WRJ1119D | JF976806 | JN045179 | JF942243 | JF954332 |
| Eudicotyledons | Rubiaceae     | <i>Leptodermis</i> | <i>Leptodermis scabrida</i>     | WRJ42    | JF976798 | JN045171 | JF942237 | JF954326 |
| Eudicotyledons | Rubiaceae     | <i>Leptodermis</i> | <i>Leptodermis scabrida</i>     | WRJ38C   | JF976800 | JN045173 | JF942239 | JF954328 |
| Eudicotyledons | Rubiaceae     | <i>Leptodermis</i> | <i>Leptodermis scabrida</i>     | WRJ38D   | JF976799 | JN045172 | JF942238 | JF954327 |
| Eudicotyledons | Rubiaceae     | <i>Leptodermis</i> | <i>Leptodermis pilosa</i>       | WRJ55C   | JF976786 | JN045157 | JF942226 | JF954315 |
| Eudicotyledons | Rubiaceae     | <i>Leptodermis</i> | <i>Leptodermis pilosa</i>       | WRJ2C    | JF976787 | JN045158 | JF942227 | JF954316 |
| Eudicotyledons | Rubiaceae     | <i>Leptodermis</i> | <i>Leptodermis ovata</i>        | WRJ1106C | JF976785 | JN045156 | JF942225 | JF954314 |
| Eudicotyledons | Rubiaceae     | <i>Leptodermis</i> | <i>Leptodermis ovata</i>        | WRJ1107D | JF976784 | JN045155 | JF942224 | JF954313 |
| Eudicotyledons | Rubiaceae     | <i>Leptodermis</i> | <i>Leptodermis ludlowii</i>     | WRJ43D   | JF976801 | JN045174 | JF942240 | JF954329 |
| Eudicotyledons | Rubiaceae     | <i>Leptodermis</i> | <i>Leptodermis ludlowii</i>     | WRJ43C   | JF976802 | JN045175 | JF942241 | JF954330 |
| Eudicotyledons | Rubiaceae     | <i>Leptodermis</i> | <i>Leptodermis hirsutiflora</i> | WRJ44D   | JF976782 | JN045153 | JF942222 | JF954311 |
| Eudicotyledons | Rubiaceae     | <i>Leptodermis</i> | <i>Leptodermis hirsutiflora</i> | WRJ44C   | JF976783 | JN045154 | JF942223 | JF954312 |
| Eudicotyledons | Rubiaceae     | <i>Leptodermis</i> | <i>Leptodermis buxifolia</i>    | WRJ45D   | JF976778 | JN045149 | JF942220 | JF954309 |
| Eudicotyledons | Rubiaceae     | <i>Leptodermis</i> | <i>Leptodermis buxifolia</i>    | WRJ45C   | JF976779 | JN045150 | JF942221 | JF954310 |
| Eudicotyledons | Brassicaceae  | <i>Lepidium</i>    | <i>Lepidium ruderale</i>        | D1577    | JF976777 | JN045148 | JF942219 | JF954308 |
| Eudicotyledons | Brassicaceae  | <i>Lepidium</i>    | <i>Lepidium ruderale</i>        | Z770     | JF976776 | JN045147 | JF942218 | JF954307 |
| Eudicotyledons | Brassicaceae  | <i>Lepidium</i>    | <i>Lepidium ruderale</i>        | Z772     | JF976774 | JN045145 | JF942216 | JF954305 |
| Eudicotyledons | Brassicaceae  | <i>Lepidium</i>    | <i>Lepidium ruderale</i>        | Z771     | JF976775 | JN045146 | JF942217 | JF954306 |
| Eudicotyledons | Brassicaceae  | <i>Lepidium</i>    | <i>Lepidium perfoliatum</i>     | Z767     | JF976773 | JN045144 | JF942215 | JF954304 |
| Eudicotyledons | Brassicaceae  | <i>Lepidium</i>    | <i>Lepidium perfoliatum</i>     | Z769     | JF976771 | JN045142 | JF942213 | JF954302 |
| Eudicotyledons | Brassicaceae  | <i>Lepidium</i>    | <i>Lepidium perfoliatum</i>     | Z768     | JF976772 | JN045143 | JF942214 | JF954303 |
| Eudicotyledons | Brassicaceae  | <i>Lepidium</i>    | <i>Lepidium apetalum</i>        | D1318    | JF976756 | JN045128 | JF942200 | JF954289 |
| Eudicotyledons | Brassicaceae  | <i>Lepidium</i>    | <i>Lepidium apetalum</i>        | A375     | JF976767 | JN045138 | JF942209 | JF954299 |
| Eudicotyledons | Brassicaceae  | <i>Lepidium</i>    | <i>Lepidium apetalum</i>        | A377     | JF976765 | JN045136 | JF942207 | JF954297 |
| Eudicotyledons | Brassicaceae  | <i>Lepidium</i>    | <i>Lepidium apetalum</i>        | A376     | JF976766 | JN045137 | JF942208 | JF954298 |
| Eudicotyledons | Brassicaceae  | <i>Lepidium</i>    | <i>Lepidium apetalum</i>        | A385     | JF976757 | JN045129 | JF942201 | JF954290 |
| Eudicotyledons | Brassicaceae  | <i>Lepidium</i>    | <i>Lepidium apetalum</i>        | A380     | JF976762 | JN045134 | JF942205 | JF954295 |
| Eudicotyledons | Brassicaceae  | <i>Lepidium</i>    | <i>Lepidium apetalum</i>        | A382     | JF976760 | JN045132 | JF942203 | JF954293 |
| Eudicotyledons | Brassicaceae  | <i>Lepidium</i>    | <i>Lepidium apetalum</i>        | Z766     | JF976753 | JN045126 | JF942197 | JF954287 |
| Eudicotyledons | Brassicaceae  | <i>Lepidium</i>    | <i>Lepidium apetalum</i>        | A374     | JF976768 | JN045139 | JF942210 | JF954300 |
| Eudicotyledons | Brassicaceae  | <i>Lepidium</i>    | <i>Lepidium apetalum</i>        | A378     | JF976764 | JN045135 | JF942206 | JF954296 |
| Eudicotyledons | Brassicaceae  | <i>Lepidium</i>    | <i>Lepidium apetalum</i>        | A381     | JF976761 | JN045133 | JF942204 | JF954294 |
| Eudicotyledons | Brassicaceae  | <i>Lepidium</i>    | <i>Lepidium apetalum</i>        | Z765     | JF976754 | JN045127 | JF942198 | JF954288 |
| Eudicotyledons | Brassicaceae  | <i>Lepidium</i>    | <i>Lepidium apetalum</i>        | A384     | JF976758 | JN045130 | JF942202 | JF954291 |
| Eudicotyledons | Brassicaceae  | <i>Lepidium</i>    | <i>Lepidium apetalum</i>        | Z764     | JF976769 | JN045140 | JF942211 | JF954301 |
| Eudicotyledons | Aquifoliaceae | <i>Ilex</i>        | <i>Ilex cornuta</i>             | Z148     | JF976683 | JN044939 | JF941994 | JF954088 |
| Eudicotyledons | Aquifoliaceae | <i>Ilex</i>        | <i>Ilex cornuta</i>             | Z147     | JF976684 | JN044940 | JF941995 | JF954089 |

|                |               |                  |                               |           |          |          |          |          |
|----------------|---------------|------------------|-------------------------------|-----------|----------|----------|----------|----------|
| Eudicotyledons | Aquifoliaceae | <i>Ilex</i>      | <i>Ilex cornuta</i>           | Z145      | JF976686 | JN044942 | JF941997 | JF954091 |
| Eudicotyledons | Aquifoliaceae | <i>Ilex</i>      | <i>Ilex cornuta</i>           | Z143      | JF976688 | JN044943 | JF941999 | JF954093 |
| Eudicotyledons | Aquifoliaceae | <i>Ilex</i>      | <i>Ilex cornuta</i>           | Z149      | JF976682 | JN044938 | JF941993 | JF954087 |
| Eudicotyledons | Aquifoliaceae | <i>Ilex</i>      | <i>Ilex cornuta</i>           | Z146      | JF976685 | JN044941 | JF941996 | JF954090 |
| Eudicotyledons | Aquifoliaceae | <i>Ilex</i>      | <i>Ilex chinensis</i>         | Z142      | JF976677 | JN044933 | JF941987 | JF954082 |
| Eudicotyledons | Aquifoliaceae | <i>Ilex</i>      | <i>Ilex chinensis</i>         | Z141      | JF976678 | JN044934 | JF941988 | JF954083 |
| Eudicotyledons | Aquifoliaceae | <i>Ilex</i>      | <i>Ilex chinensis</i>         | Z138      | JF976680 | JN044936 | JF941991 | JF954085 |
| Eudicotyledons | Aquifoliaceae | <i>Ilex</i>      | <i>Ilex chinensis</i>         | Z139      | JF976679 | JN044935 | JF941990 | JF954084 |
| Eudicotyledons | Aquifoliaceae | <i>Ilex</i>      | <i>Ilex chinensis</i>         | Z137      | JF976681 | JN044937 | JF941992 | JF954086 |
| Eudicotyledons | Hypericaceae  | <i>Hypericum</i> | <i>Hypericum przewalskii</i>  | A327      | JF976672 | JN044932 | JF941982 | JF954079 |
| Eudicotyledons | Hypericaceae  | <i>Hypericum</i> | <i>Hypericum przewalskii</i>  | A328      | JF976671 | JN044931 | JF941981 | JF954078 |
| Eudicotyledons | Hypericaceae  | <i>Hypericum</i> | <i>Hypericum przewalskii</i>  | A329      | JF976670 | JN044930 | JF941980 | JF954077 |
| Eudicotyledons | Hypericaceae  | <i>Hypericum</i> | <i>Hypericum monogynum</i>    | A326      | JF976668 | JN044928 | JF941978 | JF954075 |
| Eudicotyledons | Hypericaceae  | <i>Hypericum</i> | <i>Hypericum monogynum</i>    | A323      | JF976669 | JN044929 | JF941979 | JF954076 |
| Eudicotyledons | Hydrangeaceae | <i>Hydrangea</i> | <i>Hydrangea heteromalla</i>  | D1682     | JF976655 | JN044926 | JF941962 | JF954071 |
| Eudicotyledons | Hydrangeaceae | <i>Hydrangea</i> | <i>Hydrangea heteromalla</i>  | D1242     | JF976656 | JN044927 | JF941963 | JF954072 |
| Eudicotyledons | Hydrangeaceae | <i>Hydrangea</i> | <i>Hydrangea aspera</i>       | H4        | JF976654 | JN044923 | JF941959 | JF954068 |
| Eudicotyledons | Hydrangeaceae | <i>Hydrangea</i> | <i>Hydrangea aspera</i>       | H5        | JF976653 | JN044922 | JF941958 | JF954067 |
| Eudicotyledons | Hydrangeaceae | <i>Hydrangea</i> | <i>Hydrangea anomala</i>      | D978      | JF976652 | JN044921 | JF941957 | JF954066 |
| Eudicotyledons | Hydrangeaceae | <i>Hydrangea</i> | <i>Hydrangea anomala</i>      | H1        | JF976651 | JN044920 | JF941956 | JF954065 |
| Eudicotyledons | Hydrangeaceae | <i>Hydrangea</i> | <i>Hydrangea anomala</i>      | H21       | JF976650 | JN044919 | JF941955 | JF954064 |
| Eudicotyledons | Elaeagnaceae  | <i>Hippophae</i> | <i>Hippophae tibetana</i>     | LiujqH004 | JF976646 | JN044915 | JF941951 | JF954060 |
| Eudicotyledons | Elaeagnaceae  | <i>Hippophae</i> | <i>Hippophae tibetana</i>     | LiujqH005 | JF976645 | JN044914 | JF941950 | JF954059 |
| Eudicotyledons | Elaeagnaceae  | <i>Hippophae</i> | <i>Hippophae tibetana</i>     | LiujqH001 | JF976649 | JN044918 | JF941954 | JF954063 |
| Eudicotyledons | Elaeagnaceae  | <i>Hippophae</i> | <i>Hippophae tibetana</i>     | LiujqH002 | JF976648 | JN044917 | JF941953 | JF954062 |
| Eudicotyledons | Elaeagnaceae  | <i>Hippophae</i> | <i>Hippophae tibetana</i>     | LiujqH003 | JF976647 | JN044916 | JF941952 | JF954061 |
| Eudicotyledons | Elaeagnaceae  | <i>Hippophae</i> | <i>Hippophae salicifolia</i>  | LiujqH024 | JF976641 | JN044910 | JF941946 | JF954055 |
| Eudicotyledons | Elaeagnaceae  | <i>Hippophae</i> | <i>Hippophae salicifolia</i>  | LiujqH022 | JF976643 | JN044912 | JF941948 | JF954057 |
| Eudicotyledons | Elaeagnaceae  | <i>Hippophae</i> | <i>Hippophae salicifolia</i>  | LiujqH023 | JF976642 | JN044911 | JF941947 | JF954056 |
| Eudicotyledons | Elaeagnaceae  | <i>Hippophae</i> | <i>Hippophae salicifolia</i>  | LiujqH021 | JF976644 | JN044913 | JF941949 | JF954058 |
| Eudicotyledons | Elaeagnaceae  | <i>Hippophae</i> | <i>Hippophae salicifolia</i>  | LiujqH025 | JF976640 | JN044909 | JF941945 | JF954054 |
| Eudicotyledons | Cucurbitaceae | <i>Hemsleya</i>  | <i>Hemsleya zhejiangensis</i> | LiHT0513  | JF976603 | JN044883 | JF941905 | JF954014 |
| Eudicotyledons | Cucurbitaceae | <i>Hemsleya</i>  | <i>Hemsleya zhejiangensis</i> | LiHT0511  | JF976605 | JN044885 | JF941907 | JF954016 |
| Eudicotyledons | Cucurbitaceae | <i>Hemsleya</i>  | <i>Hemsleya zhejiangensis</i> | LiHT0512  | JF976604 | JN044884 | JF941906 | JF954015 |
| Eudicotyledons | Cucurbitaceae | <i>Hemsleya</i>  | <i>Hemsleya turbinata</i>     | LiHT10151 | JF976601 | JN044881 | JF941903 | JF954012 |
| Eudicotyledons | Cucurbitaceae | <i>Hemsleya</i>  | <i>Hemsleya turbinata</i>     | LiHT10150 | JF976602 | JN044882 | JF941904 | JF954013 |
| Eudicotyledons | Cucurbitaceae | <i>Hemsleya</i>  | <i>Hemsleya turbinata</i>     | LiHT10153 | JF976599 | JN044879 | JF941901 | JF954010 |
| Eudicotyledons | Cucurbitaceae | <i>Hemsleya</i>  | <i>Hemsleya turbinata</i>     | LiHT10152 | JF976600 | JN044880 | JF941902 | JF954011 |
| Eudicotyledons | Cucurbitaceae | <i>Hemsleya</i>  | <i>Hemsleya sp. HTL-2007</i>  | LiHT0543  | JF976564 | JN044844 | JF941866 | JF953975 |
| Eudicotyledons | Cucurbitaceae | <i>Hemsleya</i>  | <i>Hemsleya sp. HTL-2007</i>  | LiHT0545  | JF976562 | JN044842 | JF941864 | JF953973 |

|                |               |                 |                               |             |          |          |          |          |
|----------------|---------------|-----------------|-------------------------------|-------------|----------|----------|----------|----------|
| Eudicotyledons | Cucurbitaceae | <i>Hemsleya</i> | <i>Hemsleya sp. HTL-2007</i>  | LiHT0544    | JF976563 | JN044843 | JF941865 | JF953974 |
| Eudicotyledons | Cucurbitaceae | <i>Hemsleya</i> | <i>Hemsleya pengxianensis</i> | LiHT0533    | JF976597 | JN044877 | JF941899 | JF954008 |
| Eudicotyledons | Cucurbitaceae | <i>Hemsleya</i> | <i>Hemsleya pengxianensis</i> | LiHT1054    | JF976596 | JN044876 | JF941898 | JF954007 |
| Eudicotyledons | Cucurbitaceae | <i>Hemsleya</i> | <i>Hemsleya pengxianensis</i> | LiHT0532    | JF976598 | JN044878 | JF941900 | JF954009 |
| Eudicotyledons | Cucurbitaceae | <i>Hemsleya</i> | <i>Hemsleya panlongqi</i>     | LiHT0540    | JF976595 | JN044875 | JF941897 | JF954006 |
| Eudicotyledons | Cucurbitaceae | <i>Hemsleya</i> | <i>Hemsleya panlongqi</i>     | LiHT0541    | JF976594 | JN044874 | JF941896 | JF954005 |
| Eudicotyledons | Cucurbitaceae | <i>Hemsleya</i> | <i>Hemsleya panlongqi</i>     | LiHT0542    | JF976593 | JN044873 | JF941895 | JF954004 |
| Eudicotyledons | Cucurbitaceae | <i>Hemsleya</i> | <i>Hemsleya panacis-</i>      | LiHT10133-1 | JF976592 | JN044872 | JF941894 | JF954003 |
| Eudicotyledons | Cucurbitaceae | <i>Hemsleya</i> | <i>Hemsleya panacis-</i>      | LiHT10133-3 | JF976590 | JN044870 | JF941892 | JF954001 |
| Eudicotyledons | Cucurbitaceae | <i>Hemsleya</i> | <i>Hemsleya panacis-</i>      | LiHT10133-2 | JF976591 | JN044871 | JF941893 | JF954002 |
| Eudicotyledons | Cucurbitaceae | <i>Hemsleya</i> | <i>Hemsleya panacis-</i>      | LiHT10136   | JF976589 | JN044869 | JF941891 | JF954000 |
| Eudicotyledons | Cucurbitaceae | <i>Hemsleya</i> | <i>Hemsleya omeiensis</i>     | LiHT0536    | JF976587 | JN044867 | JF941889 | JF953998 |
| Eudicotyledons | Cucurbitaceae | <i>Hemsleya</i> | <i>Hemsleya omeiensis</i>     | LiHT0539    | JF976586 | JN044866 | JF941888 | JF953997 |
| Eudicotyledons | Cucurbitaceae | <i>Hemsleya</i> | <i>Hemsleya omeiensis</i>     | LiHT0535    | JF976588 | JN044868 | JF941890 | JF953999 |
| Eudicotyledons | Cucurbitaceae | <i>Hemsleya</i> | <i>Hemsleya mitrata</i>       | LiHT0553    | JF976582 | JN044862 | JF941884 | JF953993 |
| Eudicotyledons | Cucurbitaceae | <i>Hemsleya</i> | <i>Hemsleya mitrata</i>       | LiHT0552    | JF976583 | JN044863 | JF941885 | JF953994 |
| Eudicotyledons | Cucurbitaceae | <i>Hemsleya</i> | <i>Hemsleya mitrata</i>       | LiHT0551    | JF976584 | JN044864 | JF941886 | JF953995 |
| Eudicotyledons | Cucurbitaceae | <i>Hemsleya</i> | <i>Hemsleya mitrata</i>       | LiHT0550    | JF976585 | JN044865 | JF941887 | JF953996 |
| Eudicotyledons | Cucurbitaceae | <i>Hemsleya</i> | <i>Hemsleya macrosperma</i>   | LiHT0557    | JF976581 | JN044861 | JF941883 | JF953992 |
| Eudicotyledons | Cucurbitaceae | <i>Hemsleya</i> | <i>Hemsleya macrosperma</i>   | LiHT0558    | JF976580 | JN044860 | JF941882 | JF953991 |
| Eudicotyledons | Cucurbitaceae | <i>Hemsleya</i> | <i>Hemsleya macrosperma</i>   | LiHT0571    | JF976579 | JN044859 | JF941881 | JF953990 |
| Eudicotyledons | Cucurbitaceae | <i>Hemsleya</i> | <i>Hemsleya macrosperma</i>   | LiHT0572    | JF976578 | JN044858 | JF941880 | JF953989 |
| Eudicotyledons | Cucurbitaceae | <i>Hemsleya</i> | <i>Hemsleya macrocarpa</i>    | LiHT10149   | JF976574 | JN044854 | JF941876 | JF953985 |
| Eudicotyledons | Cucurbitaceae | <i>Hemsleya</i> | <i>Hemsleya macrocarpa</i>    | LiHT10159   | JF976573 | JN044853 | JF941875 | JF953984 |
| Eudicotyledons | Cucurbitaceae | <i>Hemsleya</i> | <i>Hemsleya macrocarpa</i>    | LiHT10162   | JF976572 | JN044852 | JF941874 | JF953983 |
| Eudicotyledons | Cucurbitaceae | <i>Hemsleya</i> | <i>Hemsleya macrocarpa</i>    | LiHT0583    | JF976577 | JN044857 | JF941879 | JF953988 |
| Eudicotyledons | Cucurbitaceae | <i>Hemsleya</i> | <i>Hemsleya macrocarpa</i>    | LiHT05837   | JF976575 | JN044855 | JF941877 | JF953986 |
| Eudicotyledons | Cucurbitaceae | <i>Hemsleya</i> | <i>Hemsleya macrocarpa</i>    | LiHT05836   | JF976576 | JN044856 | JF941878 | JF953987 |
| Eudicotyledons | Cucurbitaceae | <i>Hemsleya</i> | <i>Hemsleya longicarpa</i>    | LiHT0534    | JF976571 | JN044851 | JF941873 | JF953982 |
| Eudicotyledons | Cucurbitaceae | <i>Hemsleya</i> | <i>Hemsleya longicarpa</i>    | LiHT1055    | JF976570 | JN044850 | JF941872 | JF953981 |
| Eudicotyledons | Cucurbitaceae | <i>Hemsleya</i> | <i>Hemsleya lijiangensis</i>  | LiHT10201-1 | JF976566 | JN044846 | JF941868 | JF953977 |
| Eudicotyledons | Cucurbitaceae | <i>Hemsleya</i> | <i>Hemsleya lijiangensis</i>  | LiHT0546    | JF976569 | JN044849 | JF941871 | JF953980 |
| Eudicotyledons | Cucurbitaceae | <i>Hemsleya</i> | <i>Hemsleya lijiangensis</i>  | LiHT0547    | JF976568 | JN044848 | JF941870 | JF953979 |
| Eudicotyledons | Cucurbitaceae | <i>Hemsleya</i> | <i>Hemsleya lijiangensis</i>  | LiHT0548    | JF976567 | JN044847 | JF941869 | JF953978 |
| Eudicotyledons | Cucurbitaceae | <i>Hemsleya</i> | <i>Hemsleya lijiangensis</i>  | LiHT10202-2 | JF976565 | JN044845 | JF941867 | JF953976 |
| Eudicotyledons | Cucurbitaceae | <i>Hemsleya</i> | <i>Hemsleya graciliflora</i>  | LiHT0568-2  | JF976560 | JN044840 | JF941862 | JF953971 |
| Eudicotyledons | Cucurbitaceae | <i>Hemsleya</i> | <i>Hemsleya graciliflora</i>  | LiHT0569A   | JF976558 | JN044838 | JF941860 | JF953969 |
| Eudicotyledons | Cucurbitaceae | <i>Hemsleya</i> | <i>Hemsleya graciliflora</i>  | LiHT0568    | JF976561 | JN044841 | JF941863 | JF953972 |
| Eudicotyledons | Cucurbitaceae | <i>Hemsleya</i> | <i>Hemsleya graciliflora</i>  | LiHT0569    | JF976559 | JN044839 | JF941861 | JF953970 |
| Eudicotyledons | Cucurbitaceae | <i>Hemsleya</i> | <i>Hemsleya gigantea</i>      | LiHT0526    | JF976557 | JN044837 | JF941859 | JF953968 |

|                |               |                 |                              |             |          |          |          |          |
|----------------|---------------|-----------------|------------------------------|-------------|----------|----------|----------|----------|
| Eudicotyledons | Cucurbitaceae | <i>Hemsleya</i> | <i>Hemsleya gigantea</i>     | LiHT0527    | JF976556 | JN044836 | JF941858 | JF953967 |
| Eudicotyledons | Cucurbitaceae | <i>Hemsleya</i> | <i>Hemsleya gigantea</i>     | LiHT0528    | JF976555 | JN044835 | JF941857 | JF953966 |
| Eudicotyledons | Cucurbitaceae | <i>Hemsleya</i> | <i>Hemsleya gigantea</i>     | LiHT0529    | JF976554 | JN044834 | JF941856 | JF953965 |
| Eudicotyledons | Cucurbitaceae | <i>Hemsleya</i> | <i>Hemsleya endecaphylla</i> | LiHT10184   | JF976553 | JN044833 | JF941855 | JF953964 |
| Eudicotyledons | Cucurbitaceae | <i>Hemsleya</i> | <i>Hemsleya endecaphylla</i> | LiHT10185   | JF976552 | JN044832 | JF941854 | JF953963 |
| Eudicotyledons | Cucurbitaceae | <i>Hemsleya</i> | <i>Hemsleya ellipsoidea</i>  | LiHT0517    | JF976548 | JN044828 | JF941850 | JF953959 |
| Eudicotyledons | Cucurbitaceae | <i>Hemsleya</i> | <i>Hemsleya ellipsoidea</i>  | LiHT0516    | JF976549 | JN044829 | JF941851 | JF953960 |
| Eudicotyledons | Cucurbitaceae | <i>Hemsleya</i> | <i>Hemsleya ellipsoidea</i>  | LiHT0515    | JF976550 | JN044830 | JF941852 | JF953961 |
| Eudicotyledons | Cucurbitaceae | <i>Hemsleya</i> | <i>Hemsleya ellipsoidea</i>  | LiHT0514    | JF976551 | JN044831 | JF941853 | JF953962 |
| Eudicotyledons | Cucurbitaceae | <i>Hemsleya</i> | <i>Hemsleya ellipsoidea</i>  | LiHT1060    | JF976547 | JN044827 | JF941849 | JF953958 |
| Eudicotyledons | Cucurbitaceae | <i>Hemsleya</i> | <i>Hemsleya dipterygia</i>   | LiHT0564    | JF976544 | JN044824 | JF941846 | JF953955 |
| Eudicotyledons | Cucurbitaceae | <i>Hemsleya</i> | <i>Hemsleya dipterygia</i>   | LiHT0562    | JF976546 | JN044826 | JF941848 | JF953957 |
| Eudicotyledons | Cucurbitaceae | <i>Hemsleya</i> | <i>Hemsleya dipterygia</i>   | LiHT0563    | JF976545 | JN044825 | JF941847 | JF953956 |
| Eudicotyledons | Cucurbitaceae | <i>Hemsleya</i> | <i>Hemsleya chinensis</i>    | LiHT0518    | JF976543 | JN044823 | JF941845 | JF953954 |
| Eudicotyledons | Cucurbitaceae | <i>Hemsleya</i> | <i>Hemsleya chinensis</i>    | LiHT0522    | JF976539 | JN044819 | JF941841 | JF953950 |
| Eudicotyledons | Cucurbitaceae | <i>Hemsleya</i> | <i>Hemsleya chinensis</i>    | LiHT0523    | JF976538 | JN044818 | JF941840 | JF953949 |
| Eudicotyledons | Cucurbitaceae | <i>Hemsleya</i> | <i>Hemsleya chinensis</i>    | LiHT0520    | JF976541 | JN044821 | JF941843 | JF953952 |
| Eudicotyledons | Cucurbitaceae | <i>Hemsleya</i> | <i>Hemsleya chinensis</i>    | LiHT0521    | JF976540 | JN044820 | JF941842 | JF953951 |
| Eudicotyledons | Cucurbitaceae | <i>Hemsleya</i> | <i>Hemsleya chinensis</i>    | LiHT0524    | JF976537 | JN044817 | JF941839 | JF953948 |
| Eudicotyledons | Cucurbitaceae | <i>Hemsleya</i> | <i>Hemsleya chinensis</i>    | LiHT0525    | JF976536 | JN044816 | JF941838 | JF953947 |
| Eudicotyledons | Cucurbitaceae | <i>Hemsleya</i> | <i>Hemsleya chinensis</i>    | LiHT0519    | JF976542 | JN044822 | JF941844 | JF953953 |
| Eudicotyledons | Cucurbitaceae | <i>Hemsleya</i> | <i>Hemsleya chengyihana</i>  | LiHT10144   | JF976531 | JN044811 | JF941833 | JF953942 |
| Eudicotyledons | Cucurbitaceae | <i>Hemsleya</i> | <i>Hemsleya chengyihana</i>  | LiHT0555    | JF976534 | JN044814 | JF941836 | JF953945 |
| Eudicotyledons | Cucurbitaceae | <i>Hemsleya</i> | <i>Hemsleya chengyihana</i>  | LiHT0554    | JF976535 | JN044815 | JF941837 | JF953946 |
| Eudicotyledons | Cucurbitaceae | <i>Hemsleya</i> | <i>Hemsleya chengyihana</i>  | LiHT10140   | JF976533 | JN044813 | JF941835 | JF953944 |
| Eudicotyledons | Cucurbitaceae | <i>Hemsleya</i> | <i>Hemsleya chengyihana</i>  | LiHT10141   | JF976532 | JN044812 | JF941834 | JF953943 |
| Eudicotyledons | Cucurbitaceae | <i>Hemsleya</i> | <i>Hemsleya carnosiflora</i> | LiHT0581-1  | JF976530 | JN044810 | JF941832 | JF953941 |
| Eudicotyledons | Cucurbitaceae | <i>Hemsleya</i> | <i>Hemsleya carnosiflora</i> | LiHT0581-2  | JF976529 | JN044809 | JF941831 | JF953940 |
| Eudicotyledons | Cucurbitaceae | <i>Hemsleya</i> | <i>Hemsleya carnosiflora</i> | LiHT0584    | JF976528 | JN044808 | JF941830 | JF953939 |
| Eudicotyledons | Cucurbitaceae | <i>Hemsleya</i> | <i>Hemsleya carnosiflora</i> | LiHT0585    | JF976527 | JN044807 | JF941829 | JF953938 |
| Eudicotyledons | Cucurbitaceae | <i>Hemsleya</i> | <i>Hemsleya amabilis</i>     | LiHT10190   | JF976521 | JN044801 | JF941823 | JF953932 |
| Eudicotyledons | Cucurbitaceae | <i>Hemsleya</i> | <i>Hemsleya amabilis</i>     | LiHT10197   | JF976519 | JN044799 | JF941821 | JF953930 |
| Eudicotyledons | Cucurbitaceae | <i>Hemsleya</i> | <i>Hemsleya amabilis</i>     | LiHT10196   | JF976520 | JN044800 | JF941822 | JF953931 |
| Eudicotyledons | Cucurbitaceae | <i>Hemsleya</i> | <i>Hemsleya amabilis</i>     | LiHT10201-2 | JF976516 | JN044796 | JF941818 | JF953927 |
| Eudicotyledons | Cucurbitaceae | <i>Hemsleya</i> | <i>Hemsleya amabilis</i>     | LiHT10189   | JF976522 | JN044802 | JF941824 | JF953933 |
| Eudicotyledons | Cucurbitaceae | <i>Hemsleya</i> | <i>Hemsleya amabilis</i>     | LiHT0586    | JF976523 | JN044803 | JF941825 | JF953934 |
| Eudicotyledons | Cucurbitaceae | <i>Hemsleya</i> | <i>Hemsleya amabilis</i>     | LiHT0559    | JF976526 | JN044806 | JF941828 | JF953937 |
| Eudicotyledons | Cucurbitaceae | <i>Hemsleya</i> | <i>Hemsleya amabilis</i>     | LiHT10199-1 | JF976518 | JN044798 | JF941820 | JF953929 |
| Eudicotyledons | Cucurbitaceae | <i>Hemsleya</i> | <i>Hemsleya amabilis</i>     | LiHT10199-2 | JF976517 | JN044797 | JF941819 | JF953928 |
| Eudicotyledons | Cucurbitaceae | <i>Hemsleya</i> | <i>Hemsleya amabilis</i>     | LiHT0561    | JF976524 | JN044804 | JF941826 | JF953935 |



|                |               |                   |                               |                 |          |          |          |          |
|----------------|---------------|-------------------|-------------------------------|-----------------|----------|----------|----------|----------|
| Eudicotyledons | Cucurbitaceae | <i>Hemsleya</i>   | <i>Hemsleya amabilis</i>      | LiHT0560        | JF976525 | JN044805 | JF941827 | JF953936 |
| Eudicotyledons | Cucurbitaceae | <i>Hemsleya</i>   | <i>Hemsleya amabilis</i>      | LiHT10202-1     | JF976515 | JN044795 | JF941817 | JF953926 |
| Eudicotyledons | Rubiaceae     | <i>Hedyotis</i>   | <i>Hedyotis yangchunensis</i> | WRJ1270-1       | JF976514 | JN044792 | JF941814 | JF953925 |
| Eudicotyledons | Rubiaceae     | <i>Hedyotis</i>   | <i>Hedyotis yangchunensis</i> | WRJ1270-2       | JF976513 | JN044791 | JF941813 | JF953924 |
| Eudicotyledons | Rubiaceae     | <i>Hedyotis</i>   | <i>Hedyotis uncinella</i>     | WRJ1217         | JF976509 | JN044789 | JF941807 | JF953920 |
| Eudicotyledons | Rubiaceae     | <i>Hedyotis</i>   | <i>Hedyotis uncinella</i>     | WRJ0015         | JF976510 | JN044790 | JF941808 | JF953921 |
| Eudicotyledons | Rubiaceae     | <i>Hedyotis</i>   | <i>Hedyotis shiuyingiae</i>   | WRJ1255-2       | JF976503 | JN044783 | JF941801 | JF953914 |
| Eudicotyledons | Rubiaceae     | <i>Hedyotis</i>   | <i>Hedyotis shiuyingiae</i>   | WRJ1255-1       | JF976504 | JN044784 | JF941802 | JF953915 |
| Eudicotyledons | Rubiaceae     | <i>Hedyotis</i>   | <i>Hedyotis shenzhenensis</i> | WRJ1262-1       | JF976502 | JN044782 | JF941800 | JF953913 |
| Eudicotyledons | Rubiaceae     | <i>Hedyotis</i>   | <i>Hedyotis shenzhenensis</i> | WRJ1262-2       | JF976501 | JN044781 | JF941799 | JF953912 |
| Eudicotyledons | Rubiaceae     | <i>Hedyotis</i>   | <i>Hedyotis pulcherrima</i>   | WRJ1233-2       | JF976499 | JN044779 | JF941797 | JF953910 |
| Eudicotyledons | Rubiaceae     | <i>Hedyotis</i>   | <i>Hedyotis pulcherrima</i>   | WRJ1233-1       | JF976500 | JN044780 | JF941798 | JF953911 |
| Eudicotyledons | Rubiaceae     | <i>Hedyotis</i>   | <i>Hedyotis effusa</i>        | WRJ1268-2       | JF976495 | JN044775 | JF941793 | JF953906 |
| Eudicotyledons | Rubiaceae     | <i>Hedyotis</i>   | <i>Hedyotis effusa</i>        | WRJ1268-1       | JF976496 | JN044776 | JF941794 | JF953907 |
| Eudicotyledons | Rubiaceae     | <i>Hedyotis</i>   | <i>Hedyotis costata</i>       | WRJGBOWS1447    | JF976493 | JN044773 | JF941791 | JF953904 |
| Eudicotyledons | Rubiaceae     | <i>Hedyotis</i>   | <i>Hedyotis costata</i>       | WRJ1149         | JF976494 | JN044774 | JF941792 | JF953905 |
| Eudicotyledons | Rubiaceae     | <i>Hedyotis</i>   | <i>Hedyotis caudatifolia</i>  | WRJ1269         | JF976485 | JN044765 | JF941783 | JF953898 |
| Eudicotyledons | Rubiaceae     | <i>Hedyotis</i>   | <i>Hedyotis caudatifolia</i>  | WRJ1229         | JF976486 | JN044766 | JF941784 | JF953899 |
| Eudicotyledons | Rubiaceae     | <i>Hedyotis</i>   | <i>Hedyotis cantoniensis</i>  | WRJ1250         | JF976484 | JN044764 | JF941782 | JF953897 |
| Eudicotyledons | Rubiaceae     | <i>Hedyotis</i>   | <i>Hedyotis cantoniensis</i>  | WRJ1263         | JF976483 | JN044763 | JF941781 | JF953896 |
| Eudicotyledons | Rubiaceae     | <i>Hedyotis</i>   | <i>Hedyotis auricularia</i>   | WRJ0013         | JF976477 | JN044759 | JF941775 | JF953890 |
| Eudicotyledons | Rubiaceae     | <i>Hedyotis</i>   | <i>Hedyotis auricularia</i>   | WRJ1185         | JF976476 | JN044758 | JF941774 | JF953889 |
| Eudicotyledons | Gentianaceae  | <i>Gentiana</i>   | <i>Gentiana triflora</i>      | 2005-2703A      | GQ864019 | GQ86403  | JN162109 | JN162095 |
| Eudicotyledons | Gentianaceae  | <i>Gentiana</i>   | <i>Gentiana triflora</i>      | 2005-2703B      | GQ864020 | GQ86403  | JN162110 | JN162096 |
| Eudicotyledons | Gentianaceae  | <i>Gentiana</i>   | <i>Gentiana scabra</i>        | 2005-2702A      | GQ864015 | GQ86402  | JN162105 | JN162093 |
| Eudicotyledons | Gentianaceae  | <i>Gentiana</i>   | <i>Gentiana scabra</i>        | 2005-2702B      | GQ864016 | GQ86402  | JN162106 | JN162094 |
| Eudicotyledons | Gentianaceae  | <i>Gentiana</i>   | <i>Gentiana rigescens</i>     | 2005-2704A      | GQ864021 | GQ86403  | JN162111 | JN162099 |
| Eudicotyledons | Gentianaceae  | <i>Gentiana</i>   | <i>Gentiana rigescens</i>     | 2005-2704B      | GQ864022 | GQ86403  | JN162112 | JN162100 |
| Eudicotyledons | Gentianaceae  | <i>Gentiana</i>   | <i>Gentiana manshurica</i>    | 2005-2701C      | GQ864017 | GQ86402  | JN162107 | JN162097 |
| Eudicotyledons | Gentianaceae  | <i>Gentiana</i>   | <i>Gentiana manshurica</i>    | 2005-2701D      | GQ864018 | GQ86403  | JN162108 | JN162098 |
| Eudicotyledons | Ericaceae     | <i>Gaultheria</i> | <i>Gaultheria wardii</i>      | LuLu-LL-07ZQ-3  | JF976454 | JN044726 | JF941743 | JF953865 |
| Eudicotyledons | Ericaceae     | <i>Gaultheria</i> | <i>Gaultheria wardii</i>      | LuLu-LL-07ZQ-2  | JF976455 | JN044727 | JF941744 | JF953866 |
| Eudicotyledons | Ericaceae     | <i>Gaultheria</i> | <i>Gaultheria wardii</i>      | LuLu-LL-07ZQ-1  | JF976456 | JN044728 | JF941745 | JF953867 |
| Eudicotyledons | Ericaceae     | <i>Gaultheria</i> | <i>Gaultheria wardii</i>      | LuLu-LL-07ZQ-4  | JF976453 | JN044725 | JF941742 | JF953864 |
| Eudicotyledons | Ericaceae     | <i>Gaultheria</i> | <i>Gaultheria wardii</i>      | LuLu-06-0067-4  | JF976461 | JN044733 | JF941750 | JF953872 |
| Eudicotyledons | Ericaceae     | <i>Gaultheria</i> | <i>Gaultheria wardii</i>      | LuLu-06-0067-5  | JF976460 | JN044732 | JF941749 | JF953871 |
| Eudicotyledons | Ericaceae     | <i>Gaultheria</i> | <i>Gaultheria wardii</i>      | LuLu-06-0067-3  | JF976452 | JN044724 | JF941741 | JF953863 |
| Eudicotyledons | Ericaceae     | <i>Gaultheria</i> | <i>Gaultheria wardii</i>      | LuLu-LL-07301-3 | JF976459 | JN044731 | JF941748 | JF953870 |
| Eudicotyledons | Ericaceae     | <i>Gaultheria</i> | <i>Gaultheria wardii</i>      | LuLu-LL-07301-4 | JF976458 | JN044730 | JF941747 | JF953869 |
| Eudicotyledons | Ericaceae     | <i>Gaultheria</i> | <i>Gaultheria wardii</i>      | LuLu-LL-07301-5 | JF976457 | JN044729 | JF941746 | JF953868 |

|                |           |                   |                                   |                   |          |          |          |          |
|----------------|-----------|-------------------|-----------------------------------|-------------------|----------|----------|----------|----------|
| Eudicotyledons | Ericaceae | <i>Gaultheria</i> | <i>Gaultheria trigonoclada</i>    | LuLu-LL-07216-4   | JF976450 | JN044720 | JF941737 | JF953861 |
| Eudicotyledons | Ericaceae | <i>Gaultheria</i> | <i>Gaultheria trigonoclada</i>    | LuLu-LL-07216-5   | JF976449 | JN044719 | JF941736 | JF953860 |
| Eudicotyledons | Ericaceae | <i>Gaultheria</i> | <i>Gaultheria trigonoclada</i>    | LuLu-LL-07216-3   | JF976451 | JN044721 | JF941738 | JF953862 |
| Eudicotyledons | Ericaceae | <i>Gaultheria</i> | <i>Gaultheria trichophylla</i>    | LuLu-LL-07155-3   | JF976447 | JN044716 | JF941733 | JF953858 |
| Eudicotyledons | Ericaceae | <i>Gaultheria</i> | <i>Gaultheria trichophylla</i>    | LuLu-06-0019-2    | JF976448 | JN044717 | JF941734 | JF953859 |
| Eudicotyledons | Ericaceae | <i>Gaultheria</i> | <i>Gaultheria tetramera</i>       | LuLu-Liuj-09490-1 | JF976444 | JN044707 | JF941724 | JF953855 |
| Eudicotyledons | Ericaceae | <i>Gaultheria</i> | <i>Gaultheria tetramera</i>       | LuLu-06-0070-2    | JF976446 | JN044709 | JF941726 | JF953857 |
| Eudicotyledons | Ericaceae | <i>Gaultheria</i> | <i>Gaultheria tetramera</i>       | LuLu-06-0070-3    | JF976445 | JN044708 | JF941725 | JF953856 |
| Eudicotyledons | Ericaceae | <i>Gaultheria</i> | <i>Gaultheria suborbicularis</i>  | LuLu-LL-07307-3   | JF976441 | JN044703 | JF941720 | JF953852 |
| Eudicotyledons | Ericaceae | <i>Gaultheria</i> | <i>Gaultheria suborbicularis</i>  | LuLu-LL-07307-2   | JF976442 | JN044704 | JF941721 | JF953853 |
| Eudicotyledons | Ericaceae | <i>Gaultheria</i> | <i>Gaultheria suborbicularis</i>  | LuLu-LL-07307-1   | JF976443 | JN044705 | JF941722 | JF953854 |
| Eudicotyledons | Ericaceae | <i>Gaultheria</i> | <i>Gaultheria suborbicularis</i>  | LuLu-LL-07307-4   | JF976440 | JN044702 | JF941719 | JF953851 |
| Eudicotyledons | Ericaceae | <i>Gaultheria</i> | <i>Gaultheria straminea</i>       | LuLu-LL-07306-4   | JF976438 | JN044700 | JF941717 | JF953849 |
| Eudicotyledons | Ericaceae | <i>Gaultheria</i> | <i>Gaultheria straminea</i>       | LuLu-LL-07306-5   | JF976437 | JN044699 | JF941716 | JF953848 |
| Eudicotyledons | Ericaceae | <i>Gaultheria</i> | <i>Gaultheria straminea</i>       | LuLu-LL-07306-3   | JF976439 | JN044701 | JF941718 | JF953850 |
| Eudicotyledons | Ericaceae | <i>Gaultheria</i> | <i>Gaultheria sinensis</i>        | LuLu-06-0040-2    | JF976435 | JN044696 | JF941713 | JF953846 |
| Eudicotyledons | Ericaceae | <i>Gaultheria</i> | <i>Gaultheria sinensis</i>        | LuLu-06-0021-3    | JF976436 | JN044697 | JF941714 | JF953847 |
| Eudicotyledons | Ericaceae | <i>Gaultheria</i> | <i>Gaultheria sinensis</i>        | LuLu-LL-07133-3   | JF976434 | JN044695 | JF941712 | JF953845 |
| Eudicotyledons | Ericaceae | <i>Gaultheria</i> | <i>Gaultheria sinensis</i>        | LuLu-LL06-15-2    | JF976433 | JN044694 | JF941711 | JF953844 |
| Eudicotyledons | Ericaceae | <i>Gaultheria</i> | <i>Gaultheria semi-infera</i>     | LuLu-06-0017-2    | JF976432 | JN044689 | JF941706 | JF953843 |
| Eudicotyledons | Ericaceae | <i>Gaultheria</i> | <i>Gaultheria semi-infera</i>     | LuLu-LL-07312-2   | JF976428 | JN044685 | JF941702 | JF953839 |
| Eudicotyledons | Ericaceae | <i>Gaultheria</i> | <i>Gaultheria semi-infera</i>     | LuLu-LL-06QQ-2    | JF976429 | JN044686 | JF941703 | JF953840 |
| Eudicotyledons | Ericaceae | <i>Gaultheria</i> | <i>Gaultheria semi-infera</i>     | LuLu-LL-06QQ-1    | JF976430 | JN044687 | JF941704 | JF953841 |
| Eudicotyledons | Ericaceae | <i>Gaultheria</i> | <i>Gaultheria semi-infera</i>     | LuLu-06-103-2     | JF976431 | JN044688 | JF941705 | JF953842 |
| Eudicotyledons | Ericaceae | <i>Gaultheria</i> | <i>Gaultheria pyrolifolia</i>     | LuLu-LL-07117-3   | JF976427 | JN044681 | JF941698 | JF953838 |
| Eudicotyledons | Ericaceae | <i>Gaultheria</i> | <i>Gaultheria pyrolifolia</i>     | LuLu-LL-07117-4   | JF976426 | JN044680 | JF941697 | JF953837 |
| Eudicotyledons | Ericaceae | <i>Gaultheria</i> | <i>Gaultheria pyrolifolia</i>     | LuLu-LL-07117-5   | JF976425 | JN044679 | JF941696 | JF953836 |
| Eudicotyledons | Ericaceae | <i>Gaultheria</i> | <i>Gaultheria pseudonotabilis</i> | LuLu-06-0045-1    | JF976424 | JN044677 | JF941694 | JF953835 |
| Eudicotyledons | Ericaceae | <i>Gaultheria</i> | <i>Gaultheria pseudonotabilis</i> | LuLu-06-0045-2    | JF976423 | JN044676 | JF941693 | JF953834 |
| Eudicotyledons | Ericaceae | <i>Gaultheria</i> | <i>Gaultheria pseudonotabilis</i> | LuLu-06-0045-4    | JF976422 | JN044675 | JF941692 | JF953833 |
| Eudicotyledons | Ericaceae | <i>Gaultheria</i> | <i>Gaultheria pseudonotabilis</i> | LuLu-06-0045-5    | JF976421 | JN044674 | JF941691 | JF953832 |
| Eudicotyledons | Ericaceae | <i>Gaultheria</i> | <i>Gaultheria praticola</i>       | LuLu-LL-07140-3   | JF976415 | JN044668 | JF941685 | JF953826 |
| Eudicotyledons | Ericaceae | <i>Gaultheria</i> | <i>Gaultheria praticola</i>       | LuLu-LL-07140-1   | JF976416 | JN044669 | JF941686 | JF953827 |
| Eudicotyledons | Ericaceae | <i>Gaultheria</i> | <i>Gaultheria praticola</i>       | LuLu-LL-07140-4   | JF976414 | JN044667 | JF941684 | JF953825 |
| Eudicotyledons | Ericaceae | <i>Gaultheria</i> | <i>Gaultheria praticola</i>       | LuLu-06-0056-1    | JF976420 | JN044673 | JF941690 | JF953831 |
| Eudicotyledons | Ericaceae | <i>Gaultheria</i> | <i>Gaultheria praticola</i>       | LuLu-06-0056-2    | JF976419 | JN044672 | JF941689 | JF953830 |
| Eudicotyledons | Ericaceae | <i>Gaultheria</i> | <i>Gaultheria praticola</i>       | LuLu-06-0056-4    | JF976418 | JN044671 | JF941688 | JF953829 |
| Eudicotyledons | Ericaceae | <i>Gaultheria</i> | <i>Gaultheria praticola</i>       | LuLu-06-0056-5    | JF976417 | JN044670 | JF941687 | JF953828 |
| Eudicotyledons | Ericaceae | <i>Gaultheria</i> | <i>Gaultheria praticola</i>       | LuLu-LL-07140-5   | JF976413 | JN044666 | JF941683 | JF953824 |
| Eudicotyledons | Ericaceae | <i>Gaultheria</i> | <i>Gaultheria nummularioides</i>  | LuLu-LL-07304-3   | JF976410 | JN044663 | JF941680 | JF953821 |

|                |           |                   |                                  |                   |          |          |          |          |
|----------------|-----------|-------------------|----------------------------------|-------------------|----------|----------|----------|----------|
| Eudicotyledons | Ericaceae | <i>Gaultheria</i> | <i>Gaultheria nummularioides</i> | LuLu-07-010-3     | JF976412 | JN044665 | JF941682 | JF953823 |
| Eudicotyledons | Ericaceae | <i>Gaultheria</i> | <i>Gaultheria nummularioides</i> | LuLu-GLGS20182-1  | JF976411 | JN044664 | JF941681 | JF953822 |
| Eudicotyledons | Ericaceae | <i>Gaultheria</i> | <i>Gaultheria</i>                | LuLu-LL06-01-2    | JF976406 | JN044652 | JF941669 | JF953817 |
| Eudicotyledons | Ericaceae | <i>Gaultheria</i> | <i>Gaultheria</i>                | LuLu-LL06-01-3    | JF976405 | JN044651 | JF941668 | JF953816 |
| Eudicotyledons | Ericaceae | <i>Gaultheria</i> | <i>Gaultheria leucocarpa</i>     | LuLu-Liu1001-1    | JF976398 | JN044643 | JF941660 | JF953810 |
| Eudicotyledons | Ericaceae | <i>Gaultheria</i> | <i>Gaultheria leucocarpa</i>     | LuLu-LL06-10-2    | JF976393 | JN044638 | JF941655 | JF953805 |
| Eudicotyledons | Ericaceae | <i>Gaultheria</i> | <i>Gaultheria leucocarpa</i>     | LuLu-Liu1001-2    | JF976397 | JN044642 | JF941659 | JF953809 |
| Eudicotyledons | Ericaceae | <i>Gaultheria</i> | <i>Gaultheria leucocarpa</i>     | LuLu-LL06-09-1    | JF976396 | JN044641 | JF941658 | JF953808 |
| Eudicotyledons | Ericaceae | <i>Gaultheria</i> | <i>Gaultheria leucocarpa</i>     | LuLu-LL06-09-2    | JF976395 | JN044640 | JF941657 | JF953807 |
| Eudicotyledons | Ericaceae | <i>Gaultheria</i> | <i>Gaultheria leucocarpa</i>     | LuLu-LTX001-2     | JF976391 | JN044636 | JF941653 | JF953804 |
| Eudicotyledons | Ericaceae | <i>Gaultheria</i> | <i>Gaultheria leucocarpa</i>     | LuLu-LU2001-2     | JF976385 | JN044630 | JF941647 | JF953798 |
| Eudicotyledons | Ericaceae | <i>Gaultheria</i> | <i>Gaultheria leucocarpa</i>     | LuLu-LU002-1      | JF976390 | JN044635 | JF941652 | JF953803 |
| Eudicotyledons | Ericaceae | <i>Gaultheria</i> | <i>Gaultheria leucocarpa</i>     | LuLu-LU002-2      | JF976389 | JN044634 | JF941651 | JF953802 |
| Eudicotyledons | Ericaceae | <i>Gaultheria</i> | <i>Gaultheria leucocarpa</i>     | LuLu-03-1607-1    | JF976404 | JN044649 | JF941666 | JF953815 |
| Eudicotyledons | Ericaceae | <i>Gaultheria</i> | <i>Gaultheria leucocarpa</i>     | LuLu-03-1607-2    | JF976403 | JN044648 | JF941665 | JF953814 |
| Eudicotyledons | Ericaceae | <i>Gaultheria</i> | <i>Gaultheria leucocarpa</i>     | LuLu-LU2001-1     | JF976386 | JN044631 | JF941648 | JF953799 |
| Eudicotyledons | Ericaceae | <i>Gaultheria</i> | <i>Gaultheria leucocarpa</i>     | LuLu-HE001-2      | JF976399 | JN044644 | JF941661 | JF953811 |
| Eudicotyledons | Ericaceae | <i>Gaultheria</i> | <i>Gaultheria leucocarpa</i>     | LuLu-LU1001-1     | JF976388 | JN044633 | JF941650 | JF953801 |
| Eudicotyledons | Ericaceae | <i>Gaultheria</i> | <i>Gaultheria leucocarpa</i>     | LuLu-LU1001-2     | JF976387 | JN044632 | JF941649 | JF953800 |
| Eudicotyledons | Ericaceae | <i>Gaultheria</i> | <i>Gaultheria leucocarpa</i>     | LuLu-LL06-10-1    | JF976394 | JN044639 | JF941656 | JF953806 |
| Eudicotyledons | Ericaceae | <i>Gaultheria</i> | <i>Gaultheria leucocarpa</i>     | LuLu-07-011-1     | JF976402 | JN044647 | JF941664 | JF953813 |
| Eudicotyledons | Ericaceae | <i>Gaultheria</i> | <i>Gaultheria leucocarpa</i>     | LuLu-07-011-2     | JF976401 | JN044646 | JF941663 | JF953812 |
| Eudicotyledons | Ericaceae | <i>Gaultheria</i> | <i>Gaultheria jingdongensis</i>  | LuLu-06-19A-3     | JF976383 | JN044628 | JF941645 | JF953797 |
| Eudicotyledons | Ericaceae | <i>Gaultheria</i> | <i>Gaultheria jingdongensis</i>  | LuLu-06-19A-4     | JF976382 | JN044627 | JF941644 | JF953796 |
| Eudicotyledons | Ericaceae | <i>Gaultheria</i> | <i>Gaultheria hypochlora</i>     | LuLu-LL-06-0012-3 | JF976381 | JN044625 | JF941642 | JF953795 |
| Eudicotyledons | Ericaceae | <i>Gaultheria</i> | <i>Gaultheria hypochlora</i>     | LuLu-LL-07135-3   | JF976380 | JN044624 | JF941641 | JF953794 |
| Eudicotyledons | Ericaceae | <i>Gaultheria</i> | <i>Gaultheria hookeri</i>        | LuLu-03-1500-2    | JF976379 | JN044619 | JF941636 | JF953793 |
| Eudicotyledons | Ericaceae | <i>Gaultheria</i> | <i>Gaultheria hookeri</i>        | LuLu-LL-07089-3   | JF976376 | JN044616 | JF941633 | JF953790 |
| Eudicotyledons | Ericaceae | <i>Gaultheria</i> | <i>Gaultheria hookeri</i>        | LuLu-LL-06DYK-1   | JF976378 | JN044618 | JF941635 | JF953792 |
| Eudicotyledons | Ericaceae | <i>Gaultheria</i> | <i>Gaultheria hookeri</i>        | LuLu-LL-06DYK-2   | JF976377 | JN044617 | JF941634 | JF953791 |
| Eudicotyledons | Ericaceae | <i>Gaultheria</i> | <i>Gaultheria heteromera</i>     | LuLu-LL-07316A-3  | JF976374 | JN044611 | JF941628 | JF953788 |
| Eudicotyledons | Ericaceae | <i>Gaultheria</i> | <i>Gaultheria heteromera</i>     | LuLu-LL-07316A-2  | JF976375 | JN044612 | JF941629 | JF953789 |
| Eudicotyledons | Ericaceae | <i>Gaultheria</i> | <i>Gaultheria heteromera</i>     | LuLu-LL-07316A-4  | JF976373 | JN044610 | JF941627 | JF953787 |
| Eudicotyledons | Ericaceae | <i>Gaultheria</i> | <i>Gaultheria griffithiana</i>   | LuLu-06-100-1     | JF976369 | JN044605 | JF941622 | JF953783 |
| Eudicotyledons | Ericaceae | <i>Gaultheria</i> | <i>Gaultheria griffithiana</i>   | LuLu-LL-07169-3   | JF976364 | JN044600 | JF941617 | JF953778 |
| Eudicotyledons | Ericaceae | <i>Gaultheria</i> | <i>Gaultheria griffithiana</i>   | LuLu-06-0026-2    | JF976372 | JN044608 | JF941625 | JF953786 |
| Eudicotyledons | Ericaceae | <i>Gaultheria</i> | <i>Gaultheria griffithiana</i>   | LuLu-06-008-2     | JF976370 | JN044606 | JF941623 | JF953784 |
| Eudicotyledons | Ericaceae | <i>Gaultheria</i> | <i>Gaultheria griffithiana</i>   | LuLu-06-008-1     | JF976371 | JN044607 | JF941624 | JF953785 |
| Eudicotyledons | Ericaceae | <i>Gaultheria</i> | <i>Gaultheria griffithiana</i>   | LuLu-06-100-2     | JF976368 | JN044604 | JF941621 | JF953782 |
| Eudicotyledons | Ericaceae | <i>Gaultheria</i> | <i>Gaultheria griffithiana</i>   | LuLu-LL-06DSF-2   | JF976365 | JN044601 | JF941618 | JF953779 |

|                |              |                   |                                  |                   |          |          |          |          |
|----------------|--------------|-------------------|----------------------------------|-------------------|----------|----------|----------|----------|
| Eudicotyledons | Ericaceae    | <i>Gaultheria</i> | <i>Gaultheria griffithiana</i>   | LuLu-LiuJ-09511-1 | JF976367 | JN044603 | JF941620 | JF953781 |
| Eudicotyledons | Ericaceae    | <i>Gaultheria</i> | <i>Gaultheria griffithiana</i>   | LuLu-LL-06DSF-1   | JF976366 | JN044602 | JF941619 | JF953780 |
| Eudicotyledons | Ericaceae    | <i>Gaultheria</i> | <i>Gaultheria fragrantissima</i> | LuLu-LJJMC-1      | JF976357 | JN044590 | JF941607 | JF953771 |
| Eudicotyledons | Ericaceae    | <i>Gaultheria</i> | <i>Gaultheria fragrantissima</i> | LuLu-LJJMC-2      | JF976356 | JN044589 | JF941606 | JF953770 |
| Eudicotyledons | Ericaceae    | <i>Gaultheria</i> | <i>Gaultheria fragrantissima</i> | LuLu-LL-07305-3   | JF976355 | JN044588 | JF941605 | JF953769 |
| Eudicotyledons | Ericaceae    | <i>Gaultheria</i> | <i>Gaultheria fragrantissima</i> | LuLu-LU001-2      | JF976352 | JN044585 | JF941602 | JF953766 |
| Eudicotyledons | Ericaceae    | <i>Gaultheria</i> | <i>Gaultheria fragrantissima</i> | LuLu-LU001-1      | JF976353 | JN044586 | JF941603 | JF953767 |
| Eudicotyledons | Ericaceae    | <i>Gaultheria</i> | <i>Gaultheria fragrantissima</i> | LuLu-06-0027-2    | JF976361 | JN044594 | JF941611 | JF953775 |
| Eudicotyledons | Ericaceae    | <i>Gaultheria</i> | <i>Gaultheria fragrantissima</i> | LuLu-06-002-1     | JF976363 | JN044596 | JF941613 | JF953777 |
| Eudicotyledons | Ericaceae    | <i>Gaultheria</i> | <i>Gaultheria fragrantissima</i> | LuLu-06-002-2     | JF976362 | JN044595 | JF941612 | JF953776 |
| Eudicotyledons | Ericaceae    | <i>Gaultheria</i> | <i>Gaultheria fragrantissima</i> | LuLu-LL06-07-2    | JF976354 | JN044587 | JF941604 | JF953768 |
| Eudicotyledons | Ericaceae    | <i>Gaultheria</i> | <i>Gaultheria fragrantissima</i> | LuLu-07-008-2     | JF976358 | JN044591 | JF941608 | JF953772 |
| Eudicotyledons | Ericaceae    | <i>Gaultheria</i> | <i>Gaultheria fragrantissima</i> | LuLu-07-007-3     | JF976360 | JN044593 | JF941610 | JF953774 |
| Eudicotyledons | Ericaceae    | <i>Gaultheria</i> | <i>Gaultheria dumicola</i>       | LuLu-07-009-3     | JF976349 | JN044575 | JF941592 | JF953763 |
| Eudicotyledons | Ericaceae    | <i>Gaultheria</i> | <i>Gaultheria dumicola</i>       | LuLu-06-66-3      | JF976350 | JN044576 | JF941593 | JF953764 |
| Eudicotyledons | Ericaceae    | <i>Gaultheria</i> | <i>Gaultheria dumicola</i>       | LuLu-06-101-3     | JF976351 | JN044577 | JF941594 | JF953765 |
| Eudicotyledons | Ericaceae    | <i>Gaultheria</i> | <i>Gaultheria dolichopoda</i>    | LuLu-06-0005-4    | JF976346 | JN044568 | JF941585 | JF953760 |
| Eudicotyledons | Ericaceae    | <i>Gaultheria</i> | <i>Gaultheria dolichopoda</i>    | LuLu-06-0005-2    | JF976348 | JN044570 | JF941587 | JF953762 |
| Eudicotyledons | Ericaceae    | <i>Gaultheria</i> | <i>Gaultheria dolichopoda</i>    | LuLu-06-0005-3    | JF976347 | JN044569 | JF941586 | JF953761 |
| Eudicotyledons | Ericaceae    | <i>Gaultheria</i> | <i>Gaultheria codonantha</i>     | LuLu-LL-07303-5   | JF976343 | JN044562 | JF941579 | JF953757 |
| Eudicotyledons | Ericaceae    | <i>Gaultheria</i> | <i>Gaultheria codonantha</i>     | LuLu-LL-07303-4   | JF976344 | JN044563 | JF941580 | JF953758 |
| Eudicotyledons | Ericaceae    | <i>Gaultheria</i> | <i>Gaultheria codonantha</i>     | LuLu-LL-07303-3   | JF976345 | JN044564 | JF941581 | JF953759 |
| Eudicotyledons | Ericaceae    | <i>Gaultheria</i> | <i>Gaultheria cardiosepala</i>   | LuLu-Zhang001-1   | JF976340 | JN044558 | JF941575 | JF953754 |
| Eudicotyledons | Ericaceae    | <i>Gaultheria</i> | <i>Gaultheria cardiosepala</i>   | LuLu-05-0016-2    | JF976342 | JN044560 | JF941577 | JF953756 |
| Eudicotyledons | Ericaceae    | <i>Gaultheria</i> | <i>Gaultheria cardiosepala</i>   | LuLu-06-0022-3    | JF976341 | JN044559 | JF941576 | JF953755 |
| Eudicotyledons | Ericaceae    | <i>Gaultheria</i> | <i>Gaultheria brevistipes</i>    | LuLu-LL-07300-4   | JF976338 | JN044554 | JF941571 | JF953752 |
| Eudicotyledons | Ericaceae    | <i>Gaultheria</i> | <i>Gaultheria brevistipes</i>    | LuLu-LL-07300-5   | JF976337 | JN044553 | JF941570 | JF953751 |
| Eudicotyledons | Ericaceae    | <i>Gaultheria</i> | <i>Gaultheria brevistipes</i>    | LuLu-LL-07300-3   | JF976339 | JN044555 | JF941572 | JF953753 |
| Eudicotyledons | Moraceae     | <i>Ficus</i>      | <i>Ficus variolosa</i>           | LHQ2010055        | JF976331 | JN044545 | JF941561 | JF953748 |
| Eudicotyledons | Moraceae     | <i>Ficus</i>      | <i>Ficus variolosa</i>           | LHQ2009336        | JF976333 | JN044547 | JF941563 | JF953749 |
| Eudicotyledons | Moraceae     | <i>Ficus</i>      | <i>Ficus tinctoria</i>           | LHQ2009260        | JF976330 | JN044544 | JF941560 | JF953747 |
| Eudicotyledons | Moraceae     | <i>Ficus</i>      | <i>Ficus tinctoria</i>           | LHQ2009278        | JF976329 | JN044543 | JF941559 | JF953746 |
| Eudicotyledons | Moraceae     | <i>Ficus</i>      | <i>Ficus tinctoria</i>           | LHQ2009443        | JF976328 | JN044542 | JF941558 | JF953745 |
| Eudicotyledons | Moraceae     | <i>Ficus</i>      | <i>Ficus semicordata</i>         | LHQ2009346        | JF976327 | JN044539 | JF941555 | JF953744 |
| Eudicotyledons | Moraceae     | <i>Ficus</i>      | <i>Ficus semicordata</i>         | LHQ2009454        | JF976325 | JN044536 | JF941552 | JF953742 |
| Eudicotyledons | Moraceae     | <i>Ficus</i>      | <i>Ficus cyrtophylla</i>         | LHQ2009397        | JF976318 | JN044514 | JF941525 | JF953729 |
| Eudicotyledons | Moraceae     | <i>Ficus</i>      | <i>Ficus cyrtophylla</i>         | LHQ2009303        | JF976319 | JN044515 | JF941526 | JF953730 |
| Eudicotyledons | Brassicaceae | <i>Draba</i>      | <i>Draba nemorosa</i>            | Z762              | JF976275 | JN044450 | JF941445 | JF953669 |
| Eudicotyledons | Brassicaceae | <i>Draba</i>      | <i>Draba nemorosa</i>            | Z763              | JF976274 | JN044449 | JF941444 | JF953668 |
| Eudicotyledons | Brassicaceae | <i>Draba</i>      | <i>Draba lanceolata</i>          | A191              | JF976272 | JN044447 | JF941442 | JF953666 |

|                |               |                   |                                 |                |          |          |          |          |
|----------------|---------------|-------------------|---------------------------------|----------------|----------|----------|----------|----------|
| Eudicotyledons | Brassicaceae  | <i>Draba</i>      | <i>Draba lanceolata</i>         | A190           | JF976273 | JN044448 | JF941443 | JF953667 |
| Eudicotyledons | Brassicaceae  | <i>Draba</i>      | <i>Draba lanceolata</i>         | A192           | JF976271 | JN044446 | JF941441 | JF953665 |
| Eudicotyledons | Brassicaceae  | <i>Draba</i>      | <i>Draba lanceolata</i>         | A194           | JF976269 | JN044445 | JF941439 | JF953663 |
| Eudicotyledons | Solanaceae    | <i>Datura</i>     | <i>Datura stramonium</i>        | PS1145MT03     | JN244320 | JN244370 | JN244353 | JN244334 |
| Eudicotyledons | Solanaceae    | <i>Datura</i>     | <i>Datura stramonium</i>        | PS1145MT01     | JN244318 | JN244368 | JN244351 | JN244349 |
| Eudicotyledons | Solanaceae    | <i>Datura</i>     | <i>Datura stramonium</i>        | PS1145MT02     | JN244319 | JN244369 | JN244352 | JN244350 |
| Eudicotyledons | Solanaceae    | <i>Datura</i>     | <i>Datura stramonium</i>        | PS1145MT05     | JN244322 | JN244372 | JN244355 | JN244336 |
| Eudicotyledons | Solanaceae    | <i>Datura</i>     | <i>Datura stramonium</i>        | PS1145MT04     | JN244321 | JN244371 | JN244354 | JN244335 |
| Eudicotyledons | Solanaceae    | <i>Datura</i>     | <i>Datura stramonium</i>        | PS1145MT06     | JN244323 | JN244373 | JN244356 | JN244337 |
| Eudicotyledons | Solanaceae    | <i>Datura</i>     | <i>Datura stramonium</i>        | PS1145MT07     | JN244324 | JN244374 | JN244357 | JN244338 |
| Eudicotyledons | Solanaceae    | <i>Datura</i>     | <i>Datura metel</i>             | PS1152MT01     | GQ434671 | GQ43528  | JN244364 | GQ43422  |
| Eudicotyledons | Solanaceae    | <i>Datura</i>     | <i>Datura metel</i>             | PS1152MT03     | JN244331 | JN244381 | JN244365 | JN244346 |
| Eudicotyledons | Solanaceae    | <i>Datura</i>     | <i>Datura metel</i>             | PS1152MT05     | JN244333 | JN244383 | JN244367 | JN244348 |
| Eudicotyledons | Solanaceae    | <i>Datura</i>     | <i>Datura metel</i>             | PS1152MT04     | JN244332 | JN244382 | JN244366 | JN244347 |
| Eudicotyledons | Solanaceae    | <i>Datura</i>     | <i>Datura inoxia</i>            | PS1146MT02     | JN244326 | JN244376 | JN244359 | JN244340 |
| Eudicotyledons | Solanaceae    | <i>Datura</i>     | <i>Datura inoxia</i>            | PS1146MT03     | JN244327 | JN244377 | JN244360 | JN244341 |
| Eudicotyledons | Solanaceae    | <i>Datura</i>     | <i>Datura inoxia</i>            | PS1146MT01     | JN244325 | JN244375 | JN244358 | JN244339 |
| Eudicotyledons | Campanulaceae | <i>Cyananthus</i> | <i>Cyananthus macrocalyx</i>    | SunH-07ZX-2426 | JF976208 | JN044360 | JF941348 | JF953626 |
| Eudicotyledons | Campanulaceae | <i>Cyananthus</i> | <i>Cyananthus macrocalyx</i>    | SunH-SC0058    | JF976207 | JN044359 | JF941347 | JF953625 |
| Eudicotyledons | Campanulaceae | <i>Cyananthus</i> | <i>Cyananthus macrocalyx</i>    | SunH-SC11162   | JF976206 | JN044358 | JF941346 | JF953624 |
| Eudicotyledons | Campanulaceae | <i>Cyananthus</i> | <i>Cyananthus macrocalyx</i>    | SunH-YN11237   | JF976205 | JN044357 | JF941345 | JF953623 |
| Eudicotyledons | Campanulaceae | <i>Cyananthus</i> | <i>Cyananthus lichiangensis</i> | SunH-SC11104   | JF976200 | JN044353 | JF941340 | JF953618 |
| Eudicotyledons | Campanulaceae | <i>Cyananthus</i> | <i>Cyananthus lichiangensis</i> | SunH-YN11216   | JF976198 | JN044351 | JF941338 | JF953616 |
| Eudicotyledons | Campanulaceae | <i>Cyananthus</i> | <i>Cyananthus lichiangensis</i> | SunH-SC0068    | JF976201 | JN044354 | JF941341 | JF953619 |
| Eudicotyledons | Campanulaceae | <i>Cyananthus</i> | <i>Cyananthus lichiangensis</i> | SunH-SC11193   | JF976199 | JN044352 | JF941339 | JF953617 |
| Eudicotyledons | Campanulaceae | <i>Cyananthus</i> | <i>Cyananthus inflatus</i>      | NieZL-817      | JF976197 | JN044350 | JF941337 | JF953615 |
| Eudicotyledons | Campanulaceae | <i>Cyananthus</i> | <i>Cyananthus inflatus</i>      | ZhouZ-001      | JF976194 | JN044346 | JF941333 | JF953611 |
| Eudicotyledons | Campanulaceae | <i>Cyananthus</i> | <i>Cyananthus inflatus</i>      | NieZL-955      | JF976196 | JN044349 | JF941336 | JF953614 |
| Eudicotyledons | Campanulaceae | <i>Cyananthus</i> | <i>Cyananthus inflatus</i>      | SunH-YN11236   | JF976195 | JN044347 | JF941334 | JF953612 |
| Eudicotyledons | Campanulaceae | <i>Cyananthus</i> | <i>Cyananthus incanus</i>       | NieZL-757      | JF976192 | JN044344 | JF941331 | JF953609 |
| Eudicotyledons | Campanulaceae | <i>Cyananthus</i> | <i>Cyananthus incanus</i>       | NieZL-858      | JF976191 | JN044343 | JF941330 | JF953608 |
| Eudicotyledons | Campanulaceae | <i>Cyananthus</i> | <i>Cyananthus incanus</i>       | NieZL-1045     | JF976193 | JN044345 | JF941332 | JF953610 |
| Eudicotyledons | Campanulaceae | <i>Cyananthus</i> | <i>Cyananthus incanus</i>       | NieZL-913      | JF976190 | JN044342 | JF941329 | JF953607 |
| Eudicotyledons | Campanulaceae | <i>Cyananthus</i> | <i>Cyananthus incanus</i>       | SunH-SC11225   | JF976189 | JN044341 | JF941328 | JF953606 |
| Eudicotyledons | Campanulaceae | <i>Cyananthus</i> | <i>Cyananthus hookeri</i>       | NieZL-1028     | JF976188 | JN044340 | JF941327 | JF953605 |
| Eudicotyledons | Campanulaceae | <i>Cyananthus</i> | <i>Cyananthus hookeri</i>       | SunH-07ZX-2383 | JF976186 | JN044339 | JF941325 | JF953603 |
| Eudicotyledons | Campanulaceae | <i>Cyananthus</i> | <i>Cyananthus hookeri</i>       | SunH-SC11194   | JF976184 | JN044337 | JF941323 | JF953601 |
| Eudicotyledons | Campanulaceae | <i>Cyananthus</i> | <i>Cyananthus hookeri</i>       | SunH-SC11160   | JF976185 | JN044338 | JF941324 | JF953602 |
| Eudicotyledons | Campanulaceae | <i>Cyananthus</i> | <i>Cyananthus dolichosceles</i> | SunH-SC11198   | JF976181 | JN044332 | JF941318 | JF953597 |
| Eudicotyledons | Campanulaceae | <i>Cyananthus</i> | <i>Cyananthus dolichosceles</i> | SunH-SC11215   | JF976180 | JN044331 | JF941317 | JF953596 |

|                |               |                    |                                 |              |          |          |          |          |
|----------------|---------------|--------------------|---------------------------------|--------------|----------|----------|----------|----------|
| Eudicotyledons | Campanulaceae | <i>Cyananthus</i>  | <i>Cyananthus dolichosceles</i> | SunH-SC11103 | JF976183 | JN044334 | JF941320 | JF953598 |
| Eudicotyledons | Meliaceae     | <i>Cipadessa</i>   | <i>Cipadessa cinerascens</i>    | W18          | JF976159 | JN044305 | JF941283 | JF953560 |
| Eudicotyledons | Meliaceae     | <i>Cipadessa</i>   | <i>Cipadessa cinerascens</i>    | W19          | JF976158 | JN044304 | JF941282 | JF953559 |
| Eudicotyledons | Meliaceae     | <i>Cipadessa</i>   | <i>Cipadessa baccifera</i>      | W63          | JF976155 | JN044301 | JF941279 | JF953556 |
| Eudicotyledons | Meliaceae     | <i>Cipadessa</i>   | <i>Cipadessa baccifera</i>      | C464         | JF976157 | JN044303 | JF941281 | JF953558 |
| Eudicotyledons | Meliaceae     | <i>Cipadessa</i>   | <i>Cipadessa baccifera</i>      | W62          | JF976156 | JN044302 | JF941280 | JF953557 |
| Eudicotyledons | Meliaceae     | <i>Cipadessa</i>   | <i>Cipadessa baccifera</i>      | W64          | JF976154 | JN044300 | JF941278 | JF953555 |
| Eudicotyledons | Meliaceae     | <i>Cipadessa</i>   | <i>Cipadessa baccifera</i>      | W65          | JF976153 | JN044299 | JF941277 | JF953554 |
| Eudicotyledons | Amaranthaceae | <i>Chenopodium</i> | <i>Chenopodium glaucum</i>      | Z440         | JF976149 | JN044295 | JF941273 | JF953550 |
| Eudicotyledons | Amaranthaceae | <i>Chenopodium</i> | <i>Chenopodium glaucum</i>      | Z439         | JF976150 | JN044296 | JF941274 | JF953551 |
| Eudicotyledons | Amaranthaceae | <i>Chenopodium</i> | <i>Chenopodium glaucum</i>      | Z438         | JF976151 | JN044297 | JF941275 | JF953552 |
| Eudicotyledons | Amaranthaceae | <i>Chenopodium</i> | <i>Chenopodium glaucum</i>      | D1163        | JF976152 | JN044298 | JF941276 | JF953553 |
| Eudicotyledons | Amaranthaceae | <i>Chenopodium</i> | <i>Chenopodium foliosum</i>     | D1587        | JF976147 | JN044293 | JF941271 | JF953548 |
| Eudicotyledons | Amaranthaceae | <i>Chenopodium</i> | <i>Chenopodium foliosum</i>     | D1560        | JF976148 | JN044294 | JF941272 | JF953549 |
| Eudicotyledons | Amaranthaceae | <i>Chenopodium</i> | <i>Chenopodium album</i>        | A105         | JF976141 | JN044287 | JF941266 | JF953542 |
| Eudicotyledons | Amaranthaceae | <i>Chenopodium</i> | <i>Chenopodium album</i>        | A99          | JF976136 | JN044281 | JF941260 | JF953536 |
| Eudicotyledons | Amaranthaceae | <i>Chenopodium</i> | <i>Chenopodium album</i>        | A98          | JF976137 | JN044282 | JF941261 | JF953537 |
| Eudicotyledons | Amaranthaceae | <i>Chenopodium</i> | <i>Chenopodium album</i>        | A96          | JF976138 | JN044284 | JF941263 | JF953539 |
| Eudicotyledons | Amaranthaceae | <i>Chenopodium</i> | <i>Chenopodium album</i>        | Z433         | JF976131 | JN044276 | JF941255 | JF953532 |
| Eudicotyledons | Amaranthaceae | <i>Chenopodium</i> | <i>Chenopodium album</i>        | Z432         | JF976132 | JN044277 | JF941256 | JF953533 |
| Eudicotyledons | Amaranthaceae | <i>Chenopodium</i> | <i>Chenopodium album</i>        | Z431         | JF976133 | JN044278 | JF941257 | JF953534 |
| Eudicotyledons | Amaranthaceae | <i>Chenopodium</i> | <i>Chenopodium album</i>        | Z437         | JF976127 | JN044272 | JF941251 | JF953528 |
| Eudicotyledons | Amaranthaceae | <i>Chenopodium</i> | <i>Chenopodium album</i>        | Z436         | JF976128 | JN044273 | JF941252 | JF953529 |
| Eudicotyledons | Amaranthaceae | <i>Chenopodium</i> | <i>Chenopodium album</i>        | Z435         | JF976129 | JN044274 | JF941253 | JF953530 |
| Eudicotyledons | Amaranthaceae | <i>Chenopodium</i> | <i>Chenopodium album</i>        | Z434         | JF976130 | JN044275 | JF941254 | JF953531 |
| Eudicotyledons | Amaranthaceae | <i>Chenopodium</i> | <i>Chenopodium album</i>        | A106         | JF976140 | JN044286 | JF941265 | JF953541 |
| Eudicotyledons | Amaranthaceae | <i>Chenopodium</i> | <i>Chenopodium album</i>        | A107         | JF976139 | JN044285 | JF941264 | JF953540 |
| Eudicotyledons | Amaranthaceae | <i>Chenopodium</i> | <i>Chenopodium album</i>        | A104         | JF976142 | JN044288 | JF941267 | JF953543 |
| Eudicotyledons | Amaranthaceae | <i>Chenopodium</i> | <i>Chenopodium album</i>        | A102         | JF976144 | JN044290 | JF941269 | JF953545 |
| Eudicotyledons | Amaranthaceae | <i>Chenopodium</i> | <i>Chenopodium album</i>        | A103         | JF976143 | JN044289 | JF941268 | JF953544 |
| Eudicotyledons | Amaranthaceae | <i>Chenopodium</i> | <i>Chenopodium album</i>        | A100         | JF976146 | JN044292 | JF941270 | JF953547 |
| Eudicotyledons | Amaranthaceae | <i>Chenopodium</i> | <i>Chenopodium album</i>        | D1162        | JF976135 | JN044280 | JF941259 | JF953535 |
| Eudicotyledons | Ericaceae     | <i>Cassiope</i>    | <i>Cassiope selaginoides</i>    | B015         | JF976093 | JN044185 | JF941144 | JF953438 |
| Eudicotyledons | Ericaceae     | <i>Cassiope</i>    | <i>Cassiope selaginoides</i>    | B012         | JF976094 | JN044186 | JF941145 | JF953439 |
| Eudicotyledons | Ericaceae     | <i>Cassiope</i>    | <i>Cassiope selaginoides</i>    | B025         | JF976088 | JN044181 | JF941140 | JF953433 |
| Eudicotyledons | Ericaceae     | <i>Cassiope</i>    | <i>Cassiope selaginoides</i>    | B021         | JF976092 | JN044184 | JF941143 | JF953437 |
| Eudicotyledons | Ericaceae     | <i>Cassiope</i>    | <i>Cassiope selaginoides</i>    | B022         | JF976091 | JN044183 | JF941142 | JF953436 |
| Eudicotyledons | Ericaceae     | <i>Cassiope</i>    | <i>Cassiope selaginoides</i>    | B023         | JF976090 | JN044182 | JF941141 | JF953435 |
| Eudicotyledons | Ericaceae     | <i>Cassiope</i>    | <i>Cassiope pectinata</i>       | B017         | JF976086 | JN044179 | JF941138 | JF953431 |
| Eudicotyledons | Ericaceae     | <i>Cassiope</i>    | <i>Cassiope pectinata</i>       | B016         | JF976087 | JN044180 | JF941139 | JF953432 |

|                |              |                  |                                |                       |          |          |          |          |
|----------------|--------------|------------------|--------------------------------|-----------------------|----------|----------|----------|----------|
| Eudicotyledons | Ericaceae    | <i>Cassiope</i>  | <i>Cassiope fastigiata</i>     | B011                  | JF976084 | JN044177 | JF941136 | JF953430 |
| Eudicotyledons | Ericaceae    | <i>Cassiope</i>  | <i>Cassiope fastigiata</i>     | B013                  | JF976083 | JN044176 | JF941135 | JF953429 |
| Eudicotyledons | Ericaceae    | <i>Cassiope</i>  | <i>Cassiope dendrotricha</i>   | B020                  | JF976081 | JN044173 | JF941132 | JF953426 |
| Eudicotyledons | Ericaceae    | <i>Cassiope</i>  | <i>Cassiope dendrotricha</i>   | B019                  | JF976082 | JN044174 | JF941133 | JF953427 |
| Eudicotyledons | Brassicaceae | <i>Cardamine</i> | <i>Cardamine tangutorum</i>    | A85                   | JF976079 | JN044171 | JF941130 | JF953425 |
| Eudicotyledons | Brassicaceae | <i>Cardamine</i> | <i>Cardamine tangutorum</i>    | A86                   | JF976078 | JN044170 | JF941129 | JF953424 |
| Eudicotyledons | Brassicaceae | <i>Cardamine</i> | <i>Cardamine tangutorum</i>    | A87                   | JF976077 | JN044169 | JF941128 | JF953423 |
| Eudicotyledons | Brassicaceae | <i>Cardamine</i> | <i>Cardamine macrophylla</i>   | D322                  | JF976075 | JN044167 | JF941126 | JF953421 |
| Eudicotyledons | Brassicaceae | <i>Cardamine</i> | <i>Cardamine macrophylla</i>   | D1706                 | JF976076 | JN044168 | JF941127 | JF953422 |
| Eudicotyledons | Brassicaceae | <i>Cardamine</i> | <i>Cardamine impatiens</i>     | Z752                  | JF976071 | JN044162 | JF941121 | JF953416 |
| Eudicotyledons | Brassicaceae | <i>Cardamine</i> | <i>Cardamine impatiens</i>     | Z751                  | JF976072 | JN044163 | JF941122 | JF953417 |
| Eudicotyledons | Brassicaceae | <i>Cardamine</i> | <i>Cardamine impatiens</i>     | Z749                  | JF976073 | JN044165 | JF941124 | JF953419 |
| Eudicotyledons | Brassicaceae | <i>Cardamine</i> | <i>Cardamine impatiens</i>     | Z748                  | JF976074 | JN044166 | JF941125 | JF953420 |
| Eudicotyledons | Polygonaceae | <i>Bistorta</i>  | <i>Bistorta vivipara</i>       | D1426                 | JF977874 | JN046450 | JF943527 | JF955598 |
| Eudicotyledons | Polygonaceae | <i>Bistorta</i>  | <i>Bistorta vivipara</i>       | D1548                 | JF977873 | JN046449 | JF943526 | JF955597 |
| Eudicotyledons | Polygonaceae | <i>Bistorta</i>  | <i>Bistorta vivipara</i>       | D1612                 | JF977872 | JN046448 | JF943525 | JF955596 |
| Eudicotyledons | Polygonaceae | <i>Bistorta</i>  | <i>Bistorta macrophylla</i>    | A462                  | JF977855 | JN046429 | JF943506 | JF955587 |
| Eudicotyledons | Polygonaceae | <i>Bistorta</i>  | <i>Bistorta macrophylla</i>    | A455                  | JF977861 | JN046434 | JF943511 | JF955593 |
| Eudicotyledons | Polygonaceae | <i>Bistorta</i>  | <i>Bistorta macrophylla</i>    | A461                  | JF977856 | JN046430 | JF943507 | JF955588 |
| Eudicotyledons | Polygonaceae | <i>Bistorta</i>  | <i>Bistorta macrophylla</i>    | A463                  | JF977854 | JN046428 | JF943505 | JF955586 |
| Eudicotyledons | Polygonaceae | <i>Bistorta</i>  | <i>Bistorta macrophylla</i>    | A458                  | JF977858 | JN046432 | JF943509 | JF955590 |
| Eudicotyledons | Polygonaceae | <i>Bistorta</i>  | <i>Bistorta macrophylla</i>    | A457                  | JF977859 | JN046433 | JF943510 | JF955591 |
| Eudicotyledons | Polygonaceae | <i>Bistorta</i>  | <i>Bistorta macrophylla</i>    | A459                  | JF977857 | JN046431 | JF943508 | JF955589 |
| Eudicotyledons | Begoniaceae  | <i>Begonia</i>   | <i>Begonia villifolia</i>      | SYM-CKF-275           | JF976059 | JN044143 | JF941106 | JF953395 |
| Eudicotyledons | Begoniaceae  | <i>Begonia</i>   | <i>Begonia villifolia</i>      | SYM-GBOWS0813-sample3 | JF976055 | JN044139 | JF941104 | JF953394 |
| Eudicotyledons | Begoniaceae  | <i>Begonia</i>   | <i>Begonia platycarpa</i>      | SYM-B2005-016-sample1 | JF976038 | JN044119 | JF941088 | JF953378 |
| Eudicotyledons | Begoniaceae  | <i>Begonia</i>   | <i>Begonia platycarpa</i>      | SYM-B2005-016-sample3 | JF976036 | JN044117 | JF941086 | JF953376 |
| Eudicotyledons | Begoniaceae  | <i>Begonia</i>   | <i>Begonia platycarpa</i>      | SYM-B2005-016-sample2 | JF976037 | JN044118 | JF941087 | JF953377 |
| Eudicotyledons | Begoniaceae  | <i>Begonia</i>   | <i>Begonia platycarpa</i>      | SYM-B2005-029-sample3 | JF976033 | JN044115 | JF941083 | JF953373 |
| Eudicotyledons | Begoniaceae  | <i>Begonia</i>   | <i>Begonia platycarpa</i>      | SYM-B2005-029-sample1 | JF976035 | JN044116 | JF941085 | JF953375 |
| Eudicotyledons | Begoniaceae  | <i>Begonia</i>   | <i>Begonia megalophyllaria</i> | SYM-D-33-sample4      | JF976023 | JN044100 | JF941052 | JF953355 |
| Eudicotyledons | Begoniaceae  | <i>Begonia</i>   | <i>Begonia megalophyllaria</i> | SYM-82887             | JF976027 | JN044104 | JF941056 | JF953359 |
| Eudicotyledons | Begoniaceae  | <i>Begonia</i>   | <i>Begonia megalophyllaria</i> | SYM-GBOWS341          | JF976022 | JN044099 | JF941051 | JF953354 |
| Eudicotyledons | Begoniaceae  | <i>Begonia</i>   | <i>Begonia megalophyllaria</i> | SYM-D-33-sample1      | JF976026 | JN044103 | JF941055 | JF953358 |
| Eudicotyledons | Begoniaceae  | <i>Begonia</i>   | <i>Begonia megalophyllaria</i> | SYM-D-33-sample2      | JF976025 | JN044102 | JF941054 | JF953357 |
| Eudicotyledons | Begoniaceae  | <i>Begonia</i>   | <i>Begonia megalophyllaria</i> | SYM-D-33-sample3      | JF976024 | JN044101 | JF941053 | JF953356 |
| Eudicotyledons | Begoniaceae  | <i>Begonia</i>   | <i>Begonia masoniana</i>       | SYM-B2005-12-sample2  | JF976020 | JN044097 | JF941048 | JF953351 |
| Eudicotyledons | Begoniaceae  | <i>Begonia</i>   | <i>Begonia masoniana</i>       | SYM-B2005-53-sample1  | JF976019 | JN044096 | JF941047 | JF953350 |
| Eudicotyledons | Begoniaceae  | <i>Begonia</i>   | <i>Begonia masoniana</i>       | SYM-B2005-53-sample2  | JF976021 | JN044098 | JF941050 | JF953353 |
| Eudicotyledons | Begoniaceae  | <i>Begonia</i>   | <i>Begonia longistyla</i>      | SYM-40778-sample5     | JF976016 | JN044088 | JF941032 | JF953342 |

|                |               |                   |                               |                        |          |          |          |          |
|----------------|---------------|-------------------|-------------------------------|------------------------|----------|----------|----------|----------|
| Eudicotyledons | Begoniaceae   | <i>Begonia</i>    | <i>Begonia longistyla</i>     | SYM-40778-sample6      | JF976015 | JN044087 | JF941031 | JF953341 |
| Eudicotyledons | Begoniaceae   | <i>Begonia</i>    | <i>Begonia longistyla</i>     | SYM-40778-sample1      | JF976018 | JN044092 | JF941036 | JF953346 |
| Eudicotyledons | Begoniaceae   | <i>Begonia</i>    | <i>Begonia longistyla</i>     | SYM-40778-sample3      | JF976017 | JN044090 | JF941034 | JF953344 |
| Eudicotyledons | Begoniaceae   | <i>Begonia</i>    | <i>Begonia longicarpa</i>     | SYM-GBOWS1279-sample3  | JF976011 | JN044076 | JF941022 | JF953331 |
| Eudicotyledons | Begoniaceae   | <i>Begonia</i>    | <i>Begonia longicarpa</i>     | SYM-GBOWS1279-sample2  | JF976012 | JN044077 | JF941023 | JF953332 |
| Eudicotyledons | Begoniaceae   | <i>Begonia</i>    | <i>Begonia longicarpa</i>     | SYM-GBOWS1279-sample1  | JF976013 | JN044078 | JF941024 | JF953333 |
| Eudicotyledons | Begoniaceae   | <i>Begonia</i>    | <i>Begonia hekouensis</i>     | SYM-GBOWS1236-sample8  | JF975997 | JN044063 | JF941009 | JF953323 |
| Eudicotyledons | Begoniaceae   | <i>Begonia</i>    | <i>Begonia hekouensis</i>     | SYM-GBOWS1236-sample9  | JF975996 | JN044062 | JF941008 | JF953322 |
| Eudicotyledons | Begoniaceae   | <i>Begonia</i>    | <i>Begonia hekouensis</i>     | SYM-GBOWS1236-sample1  | JF976000 | JN044067 | JF941013 | JF953326 |
| Eudicotyledons | Begoniaceae   | <i>Begonia</i>    | <i>Begonia hekouensis</i>     | SYM-GBOWS1236-sample20 | JF975998 | JN044065 | JF941011 | JF953325 |
| Eudicotyledons | Begoniaceae   | <i>Begonia</i>    | <i>Begonia daweishanensis</i> | SYM-D-34-sample3       | JF975977 | JN044036 | JF940981 | JF953302 |
| Eudicotyledons | Begoniaceae   | <i>Begonia</i>    | <i>Begonia daweishanensis</i> | SYM-D-34-sample2       | JF975978 | JN044037 | JF940982 | JF953303 |
| Eudicotyledons | Begoniaceae   | <i>Begonia</i>    | <i>Begonia daweishanensis</i> | SYM-D-34-sample1       | JF975979 | JN044038 | JF940983 | JF953304 |
| Eudicotyledons | Begoniaceae   | <i>Begonia</i>    | <i>Begonia daweishanensis</i> | SYM-D-34-sample6       | JF975974 | JN044033 | JF940979 | JF953299 |
| Eudicotyledons | Begoniaceae   | <i>Begonia</i>    | <i>Begonia daweishanensis</i> | SYM-D-34-sample4       | JF975976 | JN044035 | JF940980 | JF953301 |
| Eudicotyledons | Begoniaceae   | <i>Begonia</i>    | <i>Begonia crystallina</i>    | SYM-D-012-sample2      | JF975966 | JN044023 | JF940966 | JF953296 |
| Eudicotyledons | Begoniaceae   | <i>Begonia</i>    | <i>Begonia crystallina</i>    | SYM-D-012-sample1      | JF975967 | JN044024 | JF940967 | JF953297 |
| Eudicotyledons | Begoniaceae   | <i>Begonia</i>    | <i>Begonia biflora</i>        | SYM-32236-sample2      | JF975963 | JN044014 | JF940954 | JF953286 |
| Eudicotyledons | Begoniaceae   | <i>Begonia</i>    | <i>Begonia biflora</i>        | SYM-32236-sample3      | JF975962 | JN044013 | JF940953 | JF953285 |
| Eudicotyledons | Begoniaceae   | <i>Begonia</i>    | <i>Begonia biflora</i>        | SYM-32236-sample6      | JF975960 | JN044010 | JF940951 | JF953283 |
| Eudicotyledons | Begoniaceae   | <i>Begonia</i>    | <i>Begonia biflora</i>        | SYM-32236-sample4      | JF975961 | JN044012 | JF940952 | JF953284 |
| Eudicotyledons | Begoniaceae   | <i>Begonia</i>    | <i>Begonia biflora</i>        | SYM-20484              | JF975965 | JN044016 | JF940956 | JF953287 |
| Eudicotyledons | Begoniaceae   | <i>Begonia</i>    | <i>Begonia biflora</i>        | SYM-44123              | JF975959 | JN044009 | JF940950 | JF953282 |
| Eudicotyledons | Begoniaceae   | <i>Begonia</i>    | <i>Begonia baviensis</i>      | SYM-D-57-sample2       | JF975957 | JN044007 | JF940947 | JF953279 |
| Eudicotyledons | Begoniaceae   | <i>Begonia</i>    | <i>Begonia baviensis</i>      | SYM-D-57-sample1       | JF975958 | JN044008 | JF940948 | JF953280 |
| Eudicotyledons | Begoniaceae   | <i>Begonia</i>    | <i>Begonia baviensis</i>      | SYM-GBOWS1324-sample1  | JF975956 | JN044006 | JF940946 | JF953278 |
| Eudicotyledons | Begoniaceae   | <i>Begonia</i>    | <i>Begonia baviensis</i>      | SYM-GBOWS1324-sample2  | JF975954 | JN044004 | JF940944 | JF953276 |
| Eudicotyledons | Begoniaceae   | <i>Begonia</i>    | <i>Begonia baviensis</i>      | SYM-GBOWS1324-sample3  | JF975953 | JN044003 | JF940943 | JF953275 |
| Eudicotyledons | Begoniaceae   | <i>Begonia</i>    | <i>Begonia baviensis</i>      | SYM-GBOWS1324-sample13 | JF975955 | JN044005 | JF940945 | JF953277 |
| Eudicotyledons | Amaranthaceae | <i>Amaranthus</i> | <i>Amaranthus tricolor</i>    | Z30                    | JF975876 | JN043909 | JF940812 | JF953165 |
| Eudicotyledons | Amaranthaceae | <i>Amaranthus</i> | <i>Amaranthus tricolor</i>    | Z31                    | JF975875 | JN043908 | JF940811 | JF953164 |
| Eudicotyledons | Amaranthaceae | <i>Amaranthus</i> | <i>Amaranthus tricolor</i>    | Z34                    | JF975874 | JN043905 | JF940808 | JF953161 |
| Eudicotyledons | Amaranthaceae | <i>Amaranthus</i> | <i>Amaranthus tricolor</i>    | Z35                    | JF975873 | JN043904 | JF940807 | JF953160 |
| Eudicotyledons | Amaranthaceae | <i>Amaranthus</i> | <i>Amaranthus tricolor</i>    | Z36                    | JF975872 | JN043903 | JF940806 | JF953159 |
| Eudicotyledons | Amaranthaceae | <i>Amaranthus</i> | <i>Amaranthus tricolor</i>    | Z37                    | JF975871 | JN043902 | JF940805 | JF953158 |
| Eudicotyledons | Amaranthaceae | <i>Amaranthus</i> | <i>Amaranthus spinosus</i>    | Z27                    | JF975865 | JN043896 | JF940799 | JF953152 |
| Eudicotyledons | Amaranthaceae | <i>Amaranthus</i> | <i>Amaranthus spinosus</i>    | Z26                    | JF975866 | JN043897 | JF940800 | JF953153 |
| Eudicotyledons | Amaranthaceae | <i>Amaranthus</i> | <i>Amaranthus spinosus</i>    | Z25                    | JF975867 | JN043898 | JF940801 | JF953154 |
| Eudicotyledons | Amaranthaceae | <i>Amaranthus</i> | <i>Amaranthus spinosus</i>    | Z24                    | JF975868 | JN043899 | JF940802 | JF953155 |
| Eudicotyledons | Amaranthaceae | <i>Amaranthus</i> | <i>Amaranthus spinosus</i>    | Z23                    | JF975869 | JN043900 | JF940803 | JF953156 |



|                |               |                   |                                 |            |          |          |          |          |
|----------------|---------------|-------------------|---------------------------------|------------|----------|----------|----------|----------|
| Eudicotyledons | Amaranthaceae | <i>Amaranthus</i> | <i>Amaranthus spinosus</i>      | Z22        | JF975870 | JN043901 | JF940804 | JF953157 |
| Eudicotyledons | Amaranthaceae | <i>Amaranthus</i> | <i>Amaranthus spinosus</i>      | Z29        | JF975863 | JN043894 | JF940797 | JF953150 |
| Eudicotyledons | Amaranthaceae | <i>Amaranthus</i> | <i>Amaranthus spinosus</i>      | Z28        | JF975864 | JN043895 | JF940798 | JF953151 |
| Eudicotyledons | Amaranthaceae | <i>Amaranthus</i> | <i>Amaranthus retroflexus</i>   | Z50        | JF975859 | JN043886 | JF940789 | JF953142 |
| Eudicotyledons | Amaranthaceae | <i>Amaranthus</i> | <i>Amaranthus retroflexus</i>   | Z47        | JF975860 | JN043889 | JF940792 | JF953145 |
| Eudicotyledons | Amaranthaceae | <i>Amaranthus</i> | <i>Amaranthus retroflexus</i>   | Z46        | JF975861 | JN043890 | JF940793 | JF953146 |
| Eudicotyledons | Amaranthaceae | <i>Amaranthus</i> | <i>Amaranthus retroflexus</i>   | Z44        | JF975862 | JN043892 | JF940795 | JF953148 |
| Eudicotyledons | Amaranthaceae | <i>Amaranthus</i> | <i>Amaranthus hybridus</i>      | Z21        | JF975857 | JN043883 | JF940786 | JF953140 |
| Eudicotyledons | Amaranthaceae | <i>Amaranthus</i> | <i>Amaranthus hybridus</i>      | Z20        | JF975858 | JN043884 | JF940787 | JF953141 |
| Eudicotyledons | Amaranthaceae | <i>Amaranthus</i> | <i>Amaranthus albus</i>         | Z4         | JF975853 | JN043879 | JF940782 | JF953136 |
| Eudicotyledons | Amaranthaceae | <i>Amaranthus</i> | <i>Amaranthus albus</i>         | Z2         | JF975855 | JN043881 | JF940784 | JF953138 |
| Eudicotyledons | Amaranthaceae | <i>Amaranthus</i> | <i>Amaranthus albus</i>         | Z3         | JF975854 | JN043880 | JF940783 | JF953137 |
| Eudicotyledons | Amaranthaceae | <i>Amaranthus</i> | <i>Amaranthus albus</i>         | Z1         | JF975856 | JN043882 | JF940785 | JF953139 |
| Eudicotyledons | Ranunculaceae | <i>Aconitum</i>   | <i>Aconitum sinomontanum</i>    | Yangqe0166 | JF975824 | JN043775 | JF940678 | JF953043 |
| Eudicotyledons | Ranunculaceae | <i>Aconitum</i>   | <i>Aconitum sinomontanum</i>    | Yangqe0167 | JF975823 | JN043774 | JF940677 | JF953042 |
| Eudicotyledons | Ranunculaceae | <i>Aconitum</i>   | <i>Aconitum sinomontanum</i>    | Yangqe0195 | JF975821 | JN043772 | JF940675 | JF953040 |
| Eudicotyledons | Ranunculaceae | <i>Aconitum</i>   | <i>Aconitum sinomontanum</i>    | Yangqe0194 | JF975822 | JN043773 | JF940676 | JF953041 |
| Eudicotyledons | Ranunculaceae | <i>Aconitum</i>   | <i>Aconitum scaposum</i>        | Yangqe0168 | JF975818 | JN043769 | JF940674 | JF953039 |
| Eudicotyledons | Ranunculaceae | <i>Aconitum</i>   | <i>Aconitum scaposum</i>        | Yangqe0201 | JF975815 | JN043766 | JF940670 | JF953037 |
| Eudicotyledons | Ranunculaceae | <i>Aconitum</i>   | <i>Aconitum scaposum</i>        | Yangqe0200 | JF975816 | JN043767 | JF940671 | JF953038 |
| Eudicotyledons | Ranunculaceae | <i>Aconitum</i>   | <i>Aconitum monticola</i>       | Yangqe0174 | JF975814 | JN043765 | JF940669 | JF953036 |
| Eudicotyledons | Ranunculaceae | <i>Aconitum</i>   | <i>Aconitum monticola</i>       | Yangqe0191 | JF975813 | JN043764 | JF940668 | JF953035 |
| Eudicotyledons | Ranunculaceae | <i>Aconitum</i>   | <i>Aconitum longecassidatum</i> | Yangqe0228 | JF975808 | JN043758 | JF940662 | JF953030 |
| Eudicotyledons | Ranunculaceae | <i>Aconitum</i>   | <i>Aconitum longecassidatum</i> | Yangqe0165 | JF975811 | JN043761 | JF940665 | JF953032 |
| Eudicotyledons | Ranunculaceae | <i>Aconitum</i>   | <i>Aconitum longecassidatum</i> | Yangqe0198 | JF975809 | JN043759 | JF940663 | JF953031 |
| Eudicotyledons | Ranunculaceae | <i>Aconitum</i>   | <i>Aconitum longecassidatum</i> | Yangqe0229 | JF975807 | JN043757 | JF940661 | JF953029 |
| Eudicotyledons | Ranunculaceae | <i>Aconitum</i>   | <i>Aconitum longecassidatum</i> | Yangqe0164 | JF975812 | JN043762 | JF940666 | JF953033 |
| Eudicotyledons | Ranunculaceae | <i>Aconitum</i>   | <i>Aconitum barbatum</i>        | Yangqe0209 | JF975799 | JN043748 | JF940653 | JF953020 |
| Eudicotyledons | Ranunculaceae | <i>Aconitum</i>   | <i>Aconitum barbatum</i>        | Yangqe0208 | JF975800 | JN043749 | JF940654 | JF953021 |
| Eudicotyledons | Ranunculaceae | <i>Aconitum</i>   | <i>Aconitum barbatum</i>        | Yangqe0177 | JF975802 | JN043751 | JF940655 | JF953023 |
| Eudicotyledons | Ranunculaceae | <i>Aconitum</i>   | <i>Aconitum barbatum</i>        | Yangqe0176 | JF975803 | JN043752 | JF940656 | JF953024 |
| Eudicotyledons | Ranunculaceae | <i>Aconitum</i>   | <i>Aconitum barbatum</i>        | Yangqe0210 | JF975798 | JN043747 | JF940652 | JF953019 |
| Eudicotyledons | Ranunculaceae | <i>Aconitum</i>   | <i>Aconitum angustius</i>       | Yangqe0223 | JF975790 | JN043739 | JF940644 | JF953011 |
| Eudicotyledons | Ranunculaceae | <i>Aconitum</i>   | <i>Aconitum angustius</i>       | Yangqe0212 | JF975794 | JN043743 | JF940648 | JF953015 |
| Eudicotyledons | Ranunculaceae | <i>Aconitum</i>   | <i>Aconitum angustius</i>       | Yangqe0213 | JF975793 | JN043742 | JF940647 | JF953014 |
| Eudicotyledons | Ranunculaceae | <i>Aconitum</i>   | <i>Aconitum angustius</i>       | Yangqe0211 | JF975795 | JN043744 | JF940649 | JF953016 |
| Eudicotyledons | Ranunculaceae | <i>Aconitum</i>   | <i>Aconitum angustius</i>       | Yangqe0214 | JF975792 | JN043741 | JF940646 | JF953013 |
| Eudicotyledons | Ranunculaceae | <i>Aconitum</i>   | <i>Aconitum angustius</i>       | Yangqe0222 | JF975791 | JN043740 | JF940645 | JF953012 |
| Eudicotyledons | Ranunculaceae | <i>Aconitum</i>   | <i>Aconitum angustius</i>       | Yangqe0227 | JF975787 | JN043736 | JF940641 | JF953008 |
| Eudicotyledons | Ranunculaceae | <i>Aconitum</i>   | <i>Aconitum angustius</i>       | Yangqe0226 | JF975788 | JN043737 | JF940642 | JF953009 |

|                |                |                     |                                |            |          |          |          |          |
|----------------|----------------|---------------------|--------------------------------|------------|----------|----------|----------|----------|
| Eudicotyledons | Ranunculaceae  | <i>Aconitum</i>     | <i>Aconitum angustius</i>      | Yangqe0225 | JF975789 | JN043738 | JF940643 | JF953010 |
| Eudicotyledons | Ranunculaceae  | <i>Aconitum</i>     | <i>Aconitum angustius</i>      | Yangqe0185 | JF975796 | JN043745 | JF940650 | JF953017 |
| Eudicotyledons | Ranunculaceae  | <i>Aconitum</i>     | <i>Aconitum albobviolaceum</i> | Yangqe0172 | JF975785 | JN043734 | JF940639 | JF953006 |
| Eudicotyledons | Ranunculaceae  | <i>Aconitum</i>     | <i>Aconitum albobviolaceum</i> | Yangqe0202 | JF975784 | JN043733 | JF940638 | JF953005 |
| Eudicotyledons | Ranunculaceae  | <i>Aconitum</i>     | <i>Aconitum albobviolaceum</i> | Yangqe0171 | JF975786 | JN043735 | JF940640 | JF953007 |
| Eudicotyledons | Ranunculaceae  | <i>Aconitum</i>     | <i>Aconitum albobviolaceum</i> | Yangqe0203 | JF975783 | JN043732 | JF940637 | JF953004 |
| Eudicotyledons | Ranunculaceae  | <i>Aconitum</i>     | <i>Aconitum albobviolaceum</i> | Yangqe0204 | JF975782 | JN043731 | JF940636 | JF953003 |
| Eudicotyledons | Aceraceae      | <i>Acer</i>         | <i>Acer tataricum</i>          | Z86        | JF975780 | JN043729 | JF940633 | JF953000 |
| Eudicotyledons | Aceraceae      | <i>Acer</i>         | <i>Acer tataricum</i>          | Z85        | JF975781 | JN043730 | JF940634 | JF953001 |
| Eudicotyledons | Aceraceae      | <i>Acer</i>         | <i>Acer pectinatum</i>         | Z52        | JF975779 | JN043727 | JF940631 | JF952997 |
| Eudicotyledons | Aceraceae      | <i>Acer</i>         | <i>Acer pectinatum</i>         | Z53        | JF975778 | JN043726 | JF940630 | JF952996 |
| Eudicotyledons | Aceraceae      | <i>Acer</i>         | <i>Acer fabri</i>              | Z89        | JF975776 | JN043724 | JF940626 | JF952992 |
| Eudicotyledons | Aceraceae      | <i>Acer</i>         | <i>Acer fabri</i>              | Z88        | JF975777 | JN043725 | JF940627 | JF952993 |
| Eudicotyledons | Aceraceae      | <i>Acer</i>         | <i>Acer fabri</i>              | Z92        | JF975774 | JN043722 | JF940624 | JF952990 |
| Eudicotyledons | Aceraceae      | <i>Acer</i>         | <i>Acer fabri</i>              | Z91        | JF975775 | JN043723 | JF940625 | JF952991 |
| Eudicotyledons | Aceraceae      | <i>Acer</i>         | <i>Acer davidii</i>            | Z79        | JF975770 | JN043713 | JF940614 | JF952981 |
| Eudicotyledons | Aceraceae      | <i>Acer</i>         | <i>Acer davidii</i>            | Z72        | JF975773 | JN043719 | JF940621 | JF952987 |
| Eudicotyledons | Aceraceae      | <i>Acer</i>         | <i>Acer davidii</i>            | Z73        | JF975772 | JN043718 | JF940620 | JF952986 |
| Eudicotyledons | Aceraceae      | <i>Acer</i>         | <i>Acer davidii</i>            | Z75        | JF975771 | JN043716 | JF940618 | JF952984 |
| Gymnosperms    | Cephalotaxacea | <i>Cephalotaxus</i> | <i>Cephalotaxus sinensis</i>   | C123       | JF976116 | JN044261 | JF941240 | JF953517 |
| Gymnosperms    | Cephalotaxacea | <i>Cephalotaxus</i> | <i>Cephalotaxus sinensis</i>   | C125       | JF976115 | JN044260 | JF941239 | JF953516 |
| Gymnosperms    | Cephalotaxacea | <i>Cephalotaxus</i> | <i>Cephalotaxus sinensis</i>   | C035       | JF976125 | JN044270 | JF941249 | JF953526 |
| Gymnosperms    | Cephalotaxacea | <i>Cephalotaxus</i> | <i>Cephalotaxus sinensis</i>   | C037       | JF976124 | JN044269 | JF941248 | JF953525 |
| Gymnosperms    | Cephalotaxacea | <i>Cephalotaxus</i> | <i>Cephalotaxus sinensis</i>   | C032       | JF976126 | JN044271 | JF941250 | JF953527 |
| Gymnosperms    | Cephalotaxacea | <i>Cephalotaxus</i> | <i>Cephalotaxus sinensis</i>   | C057       | JF976122 | JN044267 | JF941246 | JF953523 |
| Gymnosperms    | Cephalotaxacea | <i>Cephalotaxus</i> | <i>Cephalotaxus sinensis</i>   | C052       | JF976123 | JN044268 | JF941247 | JF953524 |
| Gymnosperms    | Cephalotaxacea | <i>Cephalotaxus</i> | <i>Cephalotaxus sinensis</i>   | C113       | JF976117 | JN044262 | JF941241 | JF953518 |
| Gymnosperms    | Cephalotaxacea | <i>Cephalotaxus</i> | <i>Cephalotaxus sinensis</i>   | C083       | JF976121 | JN044266 | JF941245 | JF953522 |
| Gymnosperms    | Cephalotaxacea | <i>Cephalotaxus</i> | <i>Cephalotaxus sinensis</i>   | C107       | JF976119 | JN044264 | JF941243 | JF953520 |
| Gymnosperms    | Cephalotaxacea | <i>Cephalotaxus</i> | <i>Cephalotaxus sinensis</i>   | C096       | JF976120 | JN044265 | JF941244 | JF953521 |
| Gymnosperms    | Cephalotaxacea | <i>Cephalotaxus</i> | <i>Cephalotaxus sinensis</i>   | C109       | JF976118 | JN044263 | JF941242 | JF953519 |
| Gymnosperms    | Cephalotaxacea | <i>Cephalotaxus</i> | <i>Cephalotaxus oliveri</i>    | C041       | JF976114 | JN044259 | JF941238 | JF953515 |
| Gymnosperms    | Cephalotaxacea | <i>Cephalotaxus</i> | <i>Cephalotaxus oliveri</i>    | C044       | JF976113 | JN044258 | JF941237 | JF953514 |
| Gymnosperms    | Cephalotaxacea | <i>Cephalotaxus</i> | <i>Cephalotaxus mannii</i>     | C124       | JF976107 | JN044249 | JF941228 | JF953505 |
| Gymnosperms    | Cephalotaxacea | <i>Cephalotaxus</i> | <i>Cephalotaxus mannii</i>     | C021       | JF976110 | JN044255 | JF941234 | JF953511 |
| Gymnosperms    | Cephalotaxacea | <i>Cephalotaxus</i> | <i>Cephalotaxus mannii</i>     | C019       | JF976111 | JN044256 | JF941235 | JF953512 |
| Gymnosperms    | Cephalotaxacea | <i>Cephalotaxus</i> | <i>Cephalotaxus mannii</i>     | C111       | JF976108 | JN044250 | JF941229 | JF953506 |
| Gymnosperms    | Cephalotaxacea | <i>Cephalotaxus</i> | <i>Cephalotaxus mannii</i>     | 5456       | #N/A     | #N/A     | #N/A     | #N/A     |
| Gymnosperms    | Cephalotaxacea | <i>Cephalotaxus</i> | <i>Cephalotaxus mannii</i>     | KIB-C039   | JF976109 | JN044251 | JF941230 | JF953507 |
| Gymnosperms    | Cephalotaxacea | <i>Cephalotaxus</i> | <i>Cephalotaxus lanceolata</i> | C116       | JF976105 | JN044247 | JF941226 | JF953503 |

|                |                 |                     |                                |                             |          |          |          |          |
|----------------|-----------------|---------------------|--------------------------------|-----------------------------|----------|----------|----------|----------|
| Gymnosperms    | Cephalotaxaceae | <i>Cephalotaxus</i> | <i>Cephalotaxus lanceolata</i> | C031                        | JF976106 | JN044248 | JF941227 | JF953504 |
| Gymnosperms    | Cephalotaxaceae | <i>Cephalotaxus</i> | <i>Cephalotaxus fortunei</i>   | C002                        | JF976101 | JN044243 | JF941222 | JF953499 |
| Gymnosperms    | Cephalotaxaceae | <i>Cephalotaxus</i> | <i>Cephalotaxus fortunei</i>   | KIB-C017                    | JF976097 | JN044239 | JF941218 | JF953495 |
| Gymnosperms    | Cephalotaxaceae | <i>Cephalotaxus</i> | <i>Cephalotaxus fortunei</i>   | KIB-C008                    | JF976100 | JN044242 | JF941221 | JF953498 |
| Gymnosperms    | Cephalotaxaceae | <i>Cephalotaxus</i> | <i>Cephalotaxus fortunei</i>   | C018                        | JF976096 | JN044238 | JF941217 | JF953494 |
| Gymnosperms    | Cephalotaxaceae | <i>Cephalotaxus</i> | <i>Cephalotaxus fortunei</i>   | C011                        | JF976099 | JN044241 | JF941220 | JF953497 |
| Gymnosperms    | Cephalotaxaceae | <i>Cephalotaxus</i> | <i>Cephalotaxus fortunei</i>   | C014                        | JF976098 | JN044240 | JF941219 | JF953496 |
| Gymnosperms    | Cephalotaxaceae | <i>Cephalotaxus</i> | <i>Cephalotaxus fortunei</i>   | C087                        | JF976095 | JN044237 | JF941216 | JF953493 |
| Gymnosperms    | Taxaceae        | <i>Amentotaxus</i>  | <i>Amentotaxus yunnanensis</i> | Am21                        | JF975889 | JN043923 | JF940826 | JF953179 |
| Gymnosperms    | Taxaceae        | <i>Amentotaxus</i>  | <i>Amentotaxus yunnanensis</i> | Am22                        | JF975888 | JN043922 | JF940825 | JF953178 |
| Gymnosperms    | Taxaceae        | <i>Amentotaxus</i>  | <i>Amentotaxus poilanei</i>    | Am12                        | JF975887 | JN043921 | JF940824 | JF953177 |
| Gymnosperms    | Taxaceae        | <i>Amentotaxus</i>  | <i>Amentotaxus poilanei</i>    | Am19                        | JF975886 | JN043920 | JF940823 | JF953176 |
| Gymnosperms    | Taxaceae        | <i>Amentotaxus</i>  | <i>Amentotaxus poilanei</i>    | Am20                        | JF975885 | JN043919 | JF940822 | JF953175 |
| Gymnosperms    | Taxaceae        | <i>Amentotaxus</i>  | <i>Amentotaxus formosana</i>   | Am09                        | JF975884 | JN043917 | JF940820 | JF953173 |
| Gymnosperms    | Taxaceae        | <i>Amentotaxus</i>  | <i>Amentotaxus formosana</i>   | Am11                        | JF975882 | JN043915 | JF940818 | JF953171 |
| Gymnosperms    | Taxaceae        | <i>Amentotaxus</i>  | <i>Amentotaxus formosana</i>   | Am10                        | JF975883 | JN043916 | JF940819 | JF953172 |
| Gymnosperms    | Taxaceae        | <i>Amentotaxus</i>  | <i>Amentotaxus argotaenia</i>  | Am03                        | JF975880 | JN043913 | JF940816 | JF953169 |
| Gymnosperms    | Taxaceae        | <i>Amentotaxus</i>  | <i>Amentotaxus argotaenia</i>  | Am01                        | JF975881 | JN043914 | JF940817 | JF953170 |
| Gymnosperms    | Taxaceae        | <i>Amentotaxus</i>  | <i>Amentotaxus argotaenia</i>  | Am06                        | JF975877 | JN043910 | JF940813 | JF953166 |
| Gymnosperms    | Taxaceae        | <i>Amentotaxus</i>  | <i>Amentotaxus argotaenia</i>  | Am04                        | JF975879 | JN043912 | JF940815 | JF953168 |
| Gymnosperms    | Taxaceae        | <i>Amentotaxus</i>  | <i>Amentotaxus argotaenia</i>  | Am05                        | JF975878 | JN043911 | JF940814 | JF953167 |
| Monocotyledons | Amaryllidaceae  | <i>Allium</i>       | <i>Allium cyaneum</i>          | Li Q-Q 092201               | HQ690268 | HQ690365 | HQ69049  | HQ69031  |
| Monocotyledons | Amaryllidaceae  | <i>Allium</i>       | <i>Allium cyaneum</i>          | Li Q-Q 09080806             | HQ690563 | HQ690626 | HQ69044  | HQ69071  |
| Monocotyledons | Amaryllidaceae  | <i>Allium</i>       | <i>Allium cyaneum</i>          | Ma X-G 09080403             | HQ690267 | HQ690364 | HQ69048  | HQ69031  |
| Monocotyledons | Amaryllidaceae  | <i>Allium</i>       | <i>Allium victorialis</i>      | Li Q-Q MH09072524           | HQ690550 | HQ690620 | HQ69043  | HQ69070  |
| Monocotyledons | Amaryllidaceae  | <i>Allium</i>       | <i>Allium victorialis</i>      | Zhao L-H LQQ10081501        | HQ690559 | HQ690390 | HQ69043  | HQ69070  |
| Monocotyledons | Amaryllidaceae  | <i>Allium</i>       | <i>Allium victorialis</i>      | Zhao L-H 10071904           | HQ690558 | HQ690389 | HQ69042  | HQ69069  |
| Monocotyledons | Amaryllidaceae  | <i>Allium</i>       | <i>Allium mairei</i>           | Peng L LQQ2010082801        | HQ690289 | HQ690394 | HQ69051  | HQ69034  |
| Monocotyledons | Amaryllidaceae  | <i>Allium</i>       | <i>Allium mairei</i>           | Wang Z-X 2010091008         | HQ690574 | HQ690659 | HQ69046  | HQ69074  |
| Monocotyledons | Amaryllidaceae  | <i>Allium</i>       | <i>Allium mairei</i>           | Wang Z-X WZX2010091102      | HQ690290 | HQ690395 | HQ69051  | HQ69034  |
| Monocotyledons | Amaryllidaceae  | <i>Allium</i>       | <i>Allium ramosum</i>          | Wang C-B 09068              | HQ690285 | HQ690385 | HQ69051  | HQ69033  |
| Monocotyledons | Amaryllidaceae  | <i>Allium</i>       | <i>Allium ramosum</i>          | Wang C-B 09056              | HQ690284 | HQ690384 | HQ69050  | HQ69033  |
| Monocotyledons | Amaryllidaceae  | <i>Allium</i>       | <i>Allium ramosum</i>          | Li Q-Q & Wei X-Q 2009060502 | HQ690565 | HQ690628 | HQ69044  | HQ69071  |
| Monocotyledons | Amaryllidaceae  | <i>Allium</i>       | <i>Allium wallichii</i>        | Li Q-Q BT09072818           | HQ690250 | HQ690345 | HQ69046  | HQ69029  |
| Monocotyledons | Amaryllidaceae  | <i>Allium</i>       | <i>Allium wallichii</i>        | Li Q-Q YC09072907           | HQ690251 | HQ690346 | HQ69047  | HQ69029  |
| Monocotyledons | Amaryllidaceae  | <i>Allium</i>       | <i>Allium wallichii</i>        | Yu Y yy10080905             | HQ690252 | HQ690347 | HQ69047  | HQ69029  |
| Monocotyledons | Amaryllidaceae  | <i>Allium</i>       | <i>Allium wallichii</i>        | Li Q-Q MH09072515           | HQ690249 | HQ690344 | HQ69046  | HQ69029  |
| Monocotyledons | Amaryllidaceae  | <i>Allium</i>       | <i>Allium wallichii</i>        | Li Q-Q YL09072630           | HQ690566 | HQ690629 | HQ69044  | HQ69071  |
| Monocotyledons | Amaryllidaceae  | <i>Allium</i>       | <i>Allium wallichii</i>        | Liu S & Gao P 20100903-     | HQ690253 | HQ690348 | HQ69047  | HQ69029  |

|                |                |                 |                               |                             |          |          |          |          |
|----------------|----------------|-----------------|-------------------------------|-----------------------------|----------|----------|----------|----------|
| Monocotyledons | Amaryllidaceae | <i>Allium</i>   | <i>Allium macranthum</i>      | Li Q-Q 092206               | HQ690255 | HQ690630 | HQ69047  | HQ69029  |
| Monocotyledons | Amaryllidaceae | <i>Allium</i>   | <i>Allium macranthum</i>      | Li Q-Q 092303               | HQ690254 | HQ690350 | HQ69047  | HQ69029  |
| Monocotyledons | Amaryllidaceae | <i>Allium</i>   | <i>Allium macranthum</i>      | Li Q-Q 09080901             | HQ690562 | HQ690349 | HQ69044  | HQ69071  |
| Monocotyledons | Amaryllidaceae | <i>Allium</i>   | <i>Allium macranthum</i>      | Gao Y-D G2010081702         | HQ690256 | HQ690351 | HQ69047  | HQ69029  |
| Monocotyledons | Amaryllidaceae | <i>Allium</i>   | <i>Allium sikkimense</i>      | Gao Y-D G2010090201         | HQ690264 | HQ690360 | HQ69048  | HQ69030  |
| Monocotyledons | Amaryllidaceae | <i>Allium</i>   | <i>Allium sikkimense</i>      | Li Q-Q BW09080105           | HQ690572 | HQ690355 | HQ69048  | HQ69030  |
| Monocotyledons | Amaryllidaceae | <i>Allium</i>   | <i>Allium sikkimense</i>      | Li Q-Q & Wei X-Q 092207     | HQ690259 | HQ690354 | HQ69047  | HQ69030  |
| Monocotyledons | Amaryllidaceae | <i>Allium</i>   | <i>Allium sikkimense</i>      | Li Q-Q 09080804             | HQ690263 | HQ690359 | HQ69048  | HQ69030  |
| Monocotyledons | Amaryllidaceae | <i>Allium</i>   | <i>Allium sikkimense</i>      | Peng L PL2010083003         | HQ690261 | HQ690357 | HQ69048  | HQ69030  |
| Monocotyledons | Amaryllidaceae | <i>Allium</i>   | <i>Allium sikkimense</i>      | Huang D-Q 2010091201        | HQ690260 | HQ690356 | HQ69048  | HQ69030  |
| Monocotyledons | Amaryllidaceae | <i>Allium</i>   | <i>Allium sikkimense</i>      | Li Q-Q 2008082201           | HQ690262 | HQ690358 | HQ69048  | HQ69030  |
| Monocotyledons | Amaryllidaceae | <i>Allium</i>   | <i>Allium sikkimense</i>      | Li Q-Q 2008081602           | HQ690257 | HQ690352 | HQ69047  | HQ69030  |
| Monocotyledons | Amaryllidaceae | <i>Allium</i>   | <i>Allium condensatum</i>     | Wang C-B 0922               | HQ690573 | HQ690658 | HQ69046  | HQ69074  |
| Monocotyledons | Amaryllidaceae | <i>Allium</i>   | <i>Allium condensatum</i>     | Zhao L-H LQQ100718          | HQ690291 | HQ690397 | HQ69051  | HQ69034  |
| Monocotyledons | Amaryllidaceae | <i>Allium</i>   | <i>Allium forrestii</i>       | Gao Y-D G2010090202         | HQ690265 | HQ690362 | HQ69048  | HQ69031  |
| Monocotyledons | Amaryllidaceae | <i>Allium</i>   | <i>Allium forrestii</i>       | Ma X-G m10083103            | HQ690266 | HQ690363 | HQ69048  | HQ69031  |
| Monocotyledons | Amaryllidaceae | <i>Allium</i>   | <i>Allium maowenense</i>      | Li Q-Q 2008082104           | HQ690278 | HQ690377 | HQ69050  | HQ69032  |
| Monocotyledons | Amaryllidaceae | <i>Allium</i>   | <i>Allium maowenense</i>      | Huang D-Q 2010091401        | HQ690280 | HQ690379 | HQ69050  | HQ69032  |
| Monocotyledons | Amaryllidaceae | <i>Allium</i>   | <i>Allium maowenense</i>      | Ma X-G mxg09101301          | HQ690279 | HQ690378 | HQ69050  | HQ69032  |
| Monocotyledons | Amaryllidaceae | <i>Allium</i>   | <i>Allium maowenense</i>      | Li Q-Q 2008081904           | HQ690277 | HQ690376 | HQ69050  | HQ69032  |
| Monocotyledons | Amaryllidaceae | <i>Allium</i>   | <i>Allium prattii</i>         | Gao Y-D 20100718            | HQ690552 | HQ690622 | HQ69043  | HQ69070  |
| Monocotyledons | Amaryllidaceae | <i>Allium</i>   | <i>Allium prattii</i>         | Xu Y P090809                | HQ690540 | HQ690591 | HQ69041  | HQ69067  |
| Monocotyledons | Amaryllidaceae | <i>Allium</i>   | <i>Allium prattii</i>         | Li Q-Q & Wei X-Q 2009060903 | HQ690531 | HQ690584 | HQ69040  | HQ69066  |
| Monocotyledons | Amaryllidaceae | <i>Allium</i>   | <i>Allium prattii</i>         | Liu S & Gao P 10903         | HQ690551 | HQ690621 | HQ69043  | HQ69070  |
| Monocotyledons | Amaryllidaceae | <i>Allium</i>   | <i>Allium prattii</i>         | Li Q-Q & Wei X-Q 2009062101 | HQ690532 | HQ690586 | HQ69040  | HQ69067  |
| Monocotyledons | Amaryllidaceae | <i>Allium</i>   | <i>Allium prattii</i>         | Li Q-Q BT09072812           | HQ690541 | HQ690596 | HQ69041  | HQ69068  |
| Monocotyledons | Amaryllidaceae | <i>Allium</i>   | <i>Allium prattii</i>         | Li Q-Q BT09072810           | HQ690534 | HQ690588 | HQ69041  | HQ69067  |
| Monocotyledons | Amaryllidaceae | <i>Allium</i>   | <i>Allium prattii</i>         | Li Q-Q BW09080104           | HQ690538 | HQ690594 | HQ69041  | HQ69067  |
| Monocotyledons | Amaryllidaceae | <i>Allium</i>   | <i>Allium prattii</i>         | Li Q-Q YC09072921           | HQ690535 | HQ690589 | HQ69041  | HQ69067  |
| Monocotyledons | Amaryllidaceae | <i>Allium</i>   | <i>Allium prattii</i>         | Li Q-Q BW09080102           | HQ690537 | HQ690590 | HQ69041  | HQ69067  |
| Monocotyledons | Amaryllidaceae | <i>Allium</i>   | <i>Allium rude</i>            | Li Q-Q 2008081902           | HQ690269 | HQ690366 | HQ69049  | HQ69031  |
| Monocotyledons | Amaryllidaceae | <i>Allium</i>   | <i>Allium rude</i>            | Huang D-Q 2010091402        | HQ690271 | HQ690369 | HQ69049  | HQ69031  |
| Monocotyledons | Amaryllidaceae | <i>Allium</i>   | <i>Allium rude</i>            | Li Q-Q 2008082103           | HQ690270 | HQ690367 | HQ69049  | HQ69031  |
| Monocotyledons | Amaryllidaceae | <i>Allium</i>   | <i>Allium rude</i>            | Li Q-Q 092202               | HQ690561 | HQ690623 | HQ69044  | HQ69070  |
| Monocotyledons | Amaryllidaceae | <i>Allium</i>   | <i>Allium xichuanense</i>     | Li Q-Q 2008081901           | HQ690564 | HQ690627 | HQ69044  | HQ69071  |
| Monocotyledons | Amaryllidaceae | <i>Allium</i>   | <i>Allium xichuanense</i>     | Li Q-Q 092203               | HQ690273 | HQ690371 | HQ69049  | HQ69032  |
| Monocotyledons | Amaryllidaceae | <i>Allium</i>   | <i>Allium xichuanense</i>     | Li Q-Q 092103               | HQ690272 | HQ690370 | HQ69049  | HQ69031  |
| Monocotyledons | Asparagaceae   | <i>Tupistra</i> | <i>Tupistra pingbianensis</i> | zhangcq0012                 | JF978993 | JN047474 | JF944736 | JF956764 |

|                |               |                 |                               |              |          |          |          |          |
|----------------|---------------|-----------------|-------------------------------|--------------|----------|----------|----------|----------|
| Monocotyledons | Asparagaceae  | <i>Tupistra</i> | <i>Tupistra pingbianensis</i> | zhangcq0013  | JF978992 | JN047473 | JF944735 | JF956763 |
| Monocotyledons | Asparagaceae  | <i>Tupistra</i> | <i>Tupistra pingbianensis</i> | zhangcq0011  | JF978994 | JN047475 | JF944737 | JF956765 |
| Monocotyledons | Asparagaceae  | <i>Tupistra</i> | <i>Tupistra pingbianensis</i> | zhangcq0014  | JF978991 | JN047472 | JF944734 | JF956762 |
| Monocotyledons | Asparagaceae  | <i>Tupistra</i> | <i>Tupistra longispica</i>    | zhangcq0017  | JF978989 | JN047470 | JF944731 | JF956760 |
| Monocotyledons | Asparagaceae  | <i>Tupistra</i> | <i>Tupistra longispica</i>    | zhangcq0020  | JF978986 | JN047467 | JF944728 | JF956757 |
| Monocotyledons | Asparagaceae  | <i>Tupistra</i> | <i>Tupistra longispica</i>    | zhangcq0018  | JF978988 | JN047469 | JF944730 | JF956759 |
| Monocotyledons | Asparagaceae  | <i>Tupistra</i> | <i>Tupistra longispica</i>    | zhangcq0019  | JF978987 | JN047468 | JF944729 | JF956758 |
| Monocotyledons | Asparagaceae  | <i>Tupistra</i> | <i>Tupistra longispica</i>    | zhangcq0016  | JF978990 | JN047471 | JF944732 | JF956761 |
| Monocotyledons | Dioscoreaceae | <i>Tacca</i>    | <i>Tacca subflabellata</i>    | ZL-tacca-012 | JF978886 | JN047361 | JF944623 | JF956653 |
| Monocotyledons | Dioscoreaceae | <i>Tacca</i>    | <i>Tacca subflabellata</i>    | ZL014        | JF978884 | JN047359 | JF944621 | JF956652 |
| Monocotyledons | Dioscoreaceae | <i>Tacca</i>    | <i>Tacca subflabellata</i>    | ZL-tacca-011 | JF978887 | JN047362 | JF944624 | JF956654 |
| Monocotyledons | Dioscoreaceae | <i>Tacca</i>    | <i>Tacca plantaginea</i>      | ZL002        | JF978882 | JN047357 | JF944619 | JF956650 |
| Monocotyledons | Dioscoreaceae | <i>Tacca</i>    | <i>Tacca plantaginea</i>      | ZL001        | JF978883 | JN047358 | JF944620 | JF956651 |
| Monocotyledons | Dioscoreaceae | <i>Tacca</i>    | <i>Tacca plantaginea</i>      | ZL047        | JF978877 | JN047352 | JF944614 | JF956645 |
| Monocotyledons | Dioscoreaceae | <i>Tacca</i>    | <i>Tacca plantaginea</i>      | ZL006        | JF978880 | JN047355 | JF944617 | JF956648 |
| Monocotyledons | Dioscoreaceae | <i>Tacca</i>    | <i>Tacca plantaginea</i>      | ZL005        | JF978881 | JN047356 | JF944618 | JF956649 |
| Monocotyledons | Dioscoreaceae | <i>Tacca</i>    | <i>Tacca plantaginea</i>      | ZL-tacca-009 | JF978879 | JN047354 | JF944616 | JF956647 |
| Monocotyledons | Dioscoreaceae | <i>Tacca</i>    | <i>Tacca plantaginea</i>      | ZL-tacca-010 | JF978878 | JN047353 | JF944615 | JF956646 |
| Monocotyledons | Dioscoreaceae | <i>Tacca</i>    | <i>Tacca integrifolia</i>     | ZL036        | JF978862 | JN047329 | JF944593 | JF956624 |
| Monocotyledons | Dioscoreaceae | <i>Tacca</i>    | <i>Tacca integrifolia</i>     | ZL034        | JF978864 | JN047331 | JF944595 | JF956626 |
| Monocotyledons | Dioscoreaceae | <i>Tacca</i>    | <i>Tacca integrifolia</i>     | ZL035        | JF978863 | JN047330 | JF944594 | JF956625 |
| Monocotyledons | Dioscoreaceae | <i>Tacca</i>    | <i>Tacca integrifolia</i>     | ZL033        | JF978865 | JN047332 | JF944596 | JF956627 |
| Monocotyledons | Dioscoreaceae | <i>Tacca</i>    | <i>Tacca integrifolia</i>     | ZL031        | JF978867 | JN047334 | JF944598 | JF956629 |
| Monocotyledons | Dioscoreaceae | <i>Tacca</i>    | <i>Tacca integrifolia</i>     | ZL008        | JF978875 | JN047342 | JF944606 | JF956636 |
| Monocotyledons | Dioscoreaceae | <i>Tacca</i>    | <i>Tacca integrifolia</i>     | ZL030        | JF978868 | JN047335 | JF944599 | JF956630 |
| Monocotyledons | Dioscoreaceae | <i>Tacca</i>    | <i>Tacca integrifolia</i>     | ZL007        | JF978876 | JN047343 | JF944607 | JF956637 |
| Monocotyledons | Dioscoreaceae | <i>Tacca</i>    | <i>Tacca integrifolia</i>     | ZL023        | JF978873 | JN047340 | JF944604 | JF956634 |
| Monocotyledons | Dioscoreaceae | <i>Tacca</i>    | <i>Tacca integrifolia</i>     | ZL032        | JF978866 | JN047333 | JF944597 | JF956628 |
| Monocotyledons | Dioscoreaceae | <i>Tacca</i>    | <i>Tacca integrifolia</i>     | ZL025        | JF978871 | JN047338 | JF944602 | JF956632 |
| Monocotyledons | Dioscoreaceae | <i>Tacca</i>    | <i>Tacca integrifolia</i>     | ZL024        | JF978872 | JN047339 | JF944603 | JF956633 |
| Monocotyledons | Dioscoreaceae | <i>Tacca</i>    | <i>Tacca integrifolia</i>     | ZL022        | JF978874 | JN047341 | JF944605 | JF956635 |
| Monocotyledons | Dioscoreaceae | <i>Tacca</i>    | <i>Tacca integrifolia</i>     | ZL029        | JF978869 | JN047336 | JF944600 | JF956631 |
| Monocotyledons | Dioscoreaceae | <i>Tacca</i>    | <i>Tacca chantieri</i>        | ZL050        | JF978860 | JN047327 | JF944591 | JF956622 |
| Monocotyledons | Dioscoreaceae | <i>Tacca</i>    | <i>Tacca chantieri</i>        | ZL051        | JF978859 | JN047326 | JF944590 | JF956621 |
| Monocotyledons | Dioscoreaceae | <i>Tacca</i>    | <i>Tacca chantieri</i>        | ZL-tacca-052 | JF978858 | JN047325 | JF944589 | JF956620 |
| Monocotyledons | Dioscoreaceae | <i>Tacca</i>    | <i>Tacca chantieri</i>        | ZL053        | JF978857 | JN047324 | JF944588 | JF956619 |
| Monocotyledons | Dioscoreaceae | <i>Tacca</i>    | <i>Tacca chantieri</i>        | ZL-tacca-049 | JF978861 | JN047328 | JF944592 | JF956623 |
| Monocotyledons | Dioscoreaceae | <i>Tacca</i>    | <i>Tacca amplipectata</i>     | ZL038        | JF978855 | JN047322 | JF944586 | JF956617 |
| Monocotyledons | Dioscoreaceae | <i>Tacca</i>    | <i>Tacca amplipectata</i>     | ZL037        | JF978856 | JN047323 | JF944587 | JF956618 |
| Monocotyledons | Dioscoreaceae | <i>Tacca</i>    | <i>Tacca amplipectata</i>     | ZL044        | JF978849 | JN047316 | JF944580 | JF956611 |

|                |               |               |                             |               |          |          |          |          |
|----------------|---------------|---------------|-----------------------------|---------------|----------|----------|----------|----------|
| Monocotyledons | Dioscoreaceae | <i>Tacca</i>  | <i>Tacca amplioplacenta</i> | ZL043         | JF978850 | JN047317 | JF944581 | JF956612 |
| Monocotyledons | Dioscoreaceae | <i>Tacca</i>  | <i>Tacca amplioplacenta</i> | ZL045         | JF978848 | JN047315 | JF944579 | JF956610 |
| Monocotyledons | Dioscoreaceae | <i>Tacca</i>  | <i>Tacca amplioplacenta</i> | ZL042         | JF978851 | JN047318 | JF944582 | JF956613 |
| Monocotyledons | Dioscoreaceae | <i>Tacca</i>  | <i>Tacca amplioplacenta</i> | ZL046         | JF978847 | JN047314 | JF944578 | JF956609 |
| Monocotyledons | Dioscoreaceae | <i>Tacca</i>  | <i>Tacca amplioplacenta</i> | ZL-tacca-041  | JF978852 | JN047319 | JF944583 | JF956614 |
| Monocotyledons | Dioscoreaceae | <i>Tacca</i>  | <i>Tacca amplioplacenta</i> | ZL039         | JF978854 | JN047321 | JF944585 | JF956616 |
| Monocotyledons | Dioscoreaceae | <i>Tacca</i>  | <i>Tacca amplioplacenta</i> | ZL040         | JF978853 | JN047320 | JF944584 | JF956615 |
| Monocotyledons | Smilacaceae   | <i>Smilax</i> | <i>Smilax lanceifolia</i>   | FCX-Li39926   | JF978724 | JN047206 | JF944382 | JF956420 |
| Monocotyledons | Smilacaceae   | <i>Smilax</i> | <i>Smilax lanceifolia</i>   | FCX-Fu08TS068 | JF978726 | JN047207 | JF944384 | JF956422 |
| Monocotyledons | Smilacaceae   | <i>Smilax</i> | <i>Smilax glabra</i>        | FCX-Fu810307  | JF978700 | JN047204 | JF944361 | JF956400 |
| Monocotyledons | Smilacaceae   | <i>Smilax</i> | <i>Smilax glabra</i>        | FCX-BQ0905194 | JF978702 | JN047205 | JF944363 | JF956402 |
| Monocotyledons | Melanthiaceae | <i>Paris</i>  | <i>Paris vietnamensis</i>   | JYH77A        | JF977364 | JN045777 | JF942827 | JF954951 |
| Monocotyledons | Melanthiaceae | <i>Paris</i>  | <i>Paris vietnamensis</i>   | JYH75A        | JF977367 | JN045780 | JF942829 | JF954954 |
| Monocotyledons | Melanthiaceae | <i>Paris</i>  | <i>Paris vietnamensis</i>   | JYH75C        | JF977365 | JN045778 | JF942828 | JF954952 |
| Monocotyledons | Melanthiaceae | <i>Paris</i>  | <i>Paris vaniotii</i>       | JYH85C        | JF977359 | JN045772 | JF942825 | JF954946 |
| Monocotyledons | Melanthiaceae | <i>Paris</i>  | <i>Paris vaniotii</i>       | JYH85A        | JF977361 | JN045774 | JF942826 | JF954948 |
| Monocotyledons | Melanthiaceae | <i>Paris</i>  | <i>Paris thibetica</i>      | JYH60D        | JF977356 | JN045769 | JF942823 | JF954943 |
| Monocotyledons | Melanthiaceae | <i>Paris</i>  | <i>Paris thibetica</i>      | JYH60B        | JF977357 | JN045770 | JF942824 | JF954944 |
| Monocotyledons | Melanthiaceae | <i>Paris</i>  | <i>Paris thibetica</i>      | JYH67F        | JF977353 | JN045766 | JF942820 | JF954940 |
| Monocotyledons | Melanthiaceae | <i>Paris</i>  | <i>Paris thibetica</i>      | JYH67D        | JF977355 | JN045768 | JF942822 | JF954942 |
| Monocotyledons | Melanthiaceae | <i>Paris</i>  | <i>Paris thibetica</i>      | JYH67E        | JF977354 | JN045767 | JF942821 | JF954941 |
| Monocotyledons | Melanthiaceae | <i>Paris</i>  | <i>Paris thibetica</i>      | JYH69B        | JF977351 | JN045764 | JF942819 | JF954938 |
| Monocotyledons | Melanthiaceae | <i>Paris</i>  | <i>Paris thibetica</i>      | JYH69C        | JF977350 | JN045763 | JF942818 | JF954937 |
| Monocotyledons | Melanthiaceae | <i>Paris</i>  | <i>Paris rugosa</i>         | JYH80C        | JF977347 | JN045760 | JF942815 | JF954934 |
| Monocotyledons | Melanthiaceae | <i>Paris</i>  | <i>Paris rugosa</i>         | JYH80A        | JF977349 | JN045762 | JF942817 | JF954936 |
| Monocotyledons | Melanthiaceae | <i>Paris</i>  | <i>Paris rugosa</i>         | JYH80B        | JF977348 | JN045761 | JF942816 | JF954935 |
| Monocotyledons | Melanthiaceae | <i>Paris</i>  | <i>Paris quadrifolia</i>    | JYH79C        | JF977344 | JN045757 | JF942812 | JF954931 |
| Monocotyledons | Melanthiaceae | <i>Paris</i>  | <i>Paris quadrifolia</i>    | JYH79A        | JF977346 | JN045759 | JF942814 | JF954933 |
| Monocotyledons | Melanthiaceae | <i>Paris</i>  | <i>Paris quadrifolia</i>    | JYH79B        | JF977345 | JN045758 | JF942813 | JF954932 |
| Monocotyledons | Melanthiaceae | <i>Paris</i>  | <i>Paris marmorata</i>      | JYH50A        | JF977314 | JN045737 | JF942785 | JF954901 |
| Monocotyledons | Melanthiaceae | <i>Paris</i>  | <i>Paris marmorata</i>      | JYH50C        | JF977312 | JN045735 | JF942784 | JF954899 |
| Monocotyledons | Melanthiaceae | <i>Paris</i>  | <i>Paris marmorata</i>      | JYH49A        | JF977316 | JN045739 | JF942788 | JF954904 |
| Monocotyledons | Melanthiaceae | <i>Paris</i>  | <i>Paris mairei</i>         | JYH53B        | JF977307 | JN045733 | JF942781 | JF954894 |
| Monocotyledons | Melanthiaceae | <i>Paris</i>  | <i>Paris mairei</i>         | JYH63C        | JF977305 | JN045731 | JF942780 | JF954892 |
| Monocotyledons | Melanthiaceae | <i>Paris</i>  | <i>Paris luquanensis</i>    | JYH82B        | JF977298 | JN045727 | JF942777 | JF954885 |
| Monocotyledons | Melanthiaceae | <i>Paris</i>  | <i>Paris luquanensis</i>    | JYH82A        | JF977299 | JN045728 | JF942778 | JF954886 |
| Monocotyledons | Melanthiaceae | <i>Paris</i>  | <i>Paris luquanensis</i>    | JYH82C        | JF977297 | JN045726 | JF942776 | JF954884 |
| Monocotyledons | Melanthiaceae | <i>Paris</i>  | <i>Paris incompleta</i>     | JYH81B        | JF977295 | JN045724 | JF942774 | JF954882 |
| Monocotyledons | Melanthiaceae | <i>Paris</i>  | <i>Paris incompleta</i>     | JYH81A        | JF977296 | JN045725 | JF942775 | JF954883 |
| Monocotyledons | Melanthiaceae | <i>Paris</i>  | <i>Paris fargesii</i>       | JYH87A        | JF977293 | JN045722 | JF942773 | JF954880 |

|                |               |                    |                                  |                |          |          |          |          |
|----------------|---------------|--------------------|----------------------------------|----------------|----------|----------|----------|----------|
| Monocotyledons | Melanthiaceae | <i>Paris</i>       | <i>Paris fargesii</i>            | JYH87B         | JF977292 | JN045721 | JF942772 | JF954879 |
| Monocotyledons | Melanthiaceae | <i>Paris</i>       | <i>Paris fargesii</i>            | JYH87C         | JF977291 | JN045720 | JF942771 | JF954878 |
| Monocotyledons | Melanthiaceae | <i>Paris</i>       | <i>Paris fargesii</i>            | JYH90A         | JF977290 | JN045719 | JF942770 | JF954877 |
| Monocotyledons | Melanthiaceae | <i>Paris</i>       | <i>Paris fargesii</i>            | JYH90B         | JF977289 | JN045718 | JF942769 | JF954876 |
| Monocotyledons | Melanthiaceae | <i>Paris</i>       | <i>Paris fargesii</i>            | JYH90C         | JF977288 | JN045717 | JF942768 | JF954875 |
| Monocotyledons | Melanthiaceae | <i>Paris</i>       | <i>Paris dunniana</i>            | JYH76B         | JF977286 | JN045715 | JF942766 | JF954873 |
| Monocotyledons | Melanthiaceae | <i>Paris</i>       | <i>Paris dunniana</i>            | JYH76A         | JF977287 | JN045716 | JF942767 | JF954874 |
| Monocotyledons | Melanthiaceae | <i>Paris</i>       | <i>Paris delavayi</i>            | JYH89B         | JF977277 | JN045707 | JF942762 | JF954864 |
| Monocotyledons | Melanthiaceae | <i>Paris</i>       | <i>Paris delavayi</i>            | JYH89A         | JF977278 | JN045708 | JF942763 | JF954865 |
| Monocotyledons | Melanthiaceae | <i>Paris</i>       | <i>Paris caobangensis</i>        | JYH78B         | JF977269 | JN045699 | JF942760 | JF954856 |
| Monocotyledons | Melanthiaceae | <i>Paris</i>       | <i>Paris caobangensis</i>        | JYH78A         | JF977270 | JN045700 | JF942761 | JF954857 |
| Monocotyledons | Asparagaceae  | <i>Maianthemum</i> | <i>Maianthemum racemosum</i>     | Nie & Meng 524 | EU850031 | EU850238 | EU85009  | EU85026  |
| Monocotyledons | Asparagaceae  | <i>Maianthemum</i> | <i>Maianthemum racemosum</i>     | MengY-n369     | JF977038 | JN045467 | JF942524 | JF954615 |
| Monocotyledons | Asparagaceae  | <i>Maianthemum</i> | <i>Maianthemum racemosum</i>     | MengY-n311     | JF977039 | JN045468 | JF942525 | JF954616 |
| Monocotyledons | Asparagaceae  | <i>Maianthemum</i> | <i>Maianthemum racemosum</i>     | Wen 8562       | EU850030 | EU850237 | EU85009  | EU85026  |
| Monocotyledons | Asparagaceae  | <i>Maianthemum</i> | <i>Maianthemum purpureum</i>     | MengY-z6       | JF977032 | JN045460 | JF942517 | JF954609 |
| Monocotyledons | Asparagaceae  | <i>Maianthemum</i> | <i>Maianthemum purpureum</i>     | MengY-z5       | JF977033 | JN045461 | JF942518 | JF954610 |
| Monocotyledons | Asparagaceae  | <i>Maianthemum</i> | <i>Maianthemum purpureum</i>     | MengY-n268     | JF977034 | JN045463 | JF942520 | JF954612 |
| Monocotyledons | Asparagaceae  | <i>Maianthemum</i> | <i>Maianthemum purpureum</i>     | MengY-n265     | JF977036 | JN045465 | JF942522 | JF954614 |
| Monocotyledons | Asparagaceae  | <i>Maianthemum</i> | <i>Maianthemum purpureum</i>     | Meng 05 1      | EU850014 | EU850221 | EU85008  | EU85025  |
| Monocotyledons | Asparagaceae  | <i>Maianthemum</i> | <i>Maianthemum purpureum</i>     | MengY-n267     | JF977035 | JN045464 | JF942521 | JF954613 |
| Monocotyledons | Asparagaceae  | <i>Maianthemum</i> | <i>Maianthemum japonicum</i>     | Zhangsr0258    | JF977028 | JN045456 | JF942513 | JF954606 |
| Monocotyledons | Asparagaceae  | <i>Maianthemum</i> | <i>Maianthemum japonicum</i>     | Zhangsr0261    | JF977027 | JN045454 | JF942511 | JF954604 |
| Monocotyledons | Asparagaceae  | <i>Maianthemum</i> | <i>Maianthemum japonicum</i>     | Meng 223       | EU850024 | EU850231 | EU85009  | EU85026  |
| Monocotyledons | Asparagaceae  | <i>Maianthemum</i> | <i>Maianthemum japonicum</i>     | MengY-n207     | JF977031 | JN045459 | JF942516 | JF954608 |
| Monocotyledons | Asparagaceae  | <i>Maianthemum</i> | <i>Maianthemum henryi</i>        | Wen 9017       | EU850010 | EU850217 | EU85007  | EU85024  |
| Monocotyledons | Asparagaceae  | <i>Maianthemum</i> | <i>Maianthemum henryi</i>        | MengY-n398     | JF977025 | JN045452 | JF942509 | JF954602 |
| Monocotyledons | Asparagaceae  | <i>Maianthemum</i> | <i>Maianthemum henryi</i>        | MengY-z2       | JF977023 | JN045450 | JF942506 | JF954599 |
| Monocotyledons | Asparagaceae  | <i>Maianthemum</i> | <i>Maianthemum henryi</i>        | Nie & Meng 311 | EU850017 | EU850224 | EU85008  | EU85025  |
| Monocotyledons | Asparagaceae  | <i>Maianthemum</i> | <i>Maianthemum gongshanense</i>  | Nie & Meng 301 | EU850007 | EU850214 | 6        | 6        |
| Monocotyledons | Asparagaceae  | <i>Maianthemum</i> | <i>Maianthemum gongshanense</i>  | MengY-n192     | JF977022 | JN045446 | JF942502 | JF954595 |
| Monocotyledons | Asparagaceae  | <i>Maianthemum</i> | <i>Maianthemum gigas</i>         | Martinez 39002 | EU850034 | EU850241 | EU85009  | EU85027  |
| Monocotyledons | Asparagaceae  | <i>Maianthemum</i> | <i>Maianthemum gigas</i>         | MengY-n394     | JF977021 | JN045445 | JF942501 | JF954594 |
| Monocotyledons | Asparagaceae  | <i>Maianthemum</i> | <i>Maianthemum bifolium</i>      | Meng 211       | EU850028 | EU850235 | EU85009  | EU85026  |
| Monocotyledons | Asparagaceae  | <i>Maianthemum</i> | <i>Maianthemum bifolium</i>      | Wen 8530       | EU850027 | EU850234 | EU85009  | EU85026  |
| Monocotyledons | Asparagaceae  | <i>Maianthemum</i> | <i>Maianthemum bifolium</i>      | MengY-n280     | JF977019 | JN045443 | JF942499 | JF954592 |
| Monocotyledons | Asparagaceae  | <i>Maianthemum</i> | <i>Maianthemum atropurpureum</i> | MengY-z11      | JF977013 | JN045435 | JF942494 | JF954586 |

|                |              |                    |                                  |                 |          |          |          |          |
|----------------|--------------|--------------------|----------------------------------|-----------------|----------|----------|----------|----------|
| Monocotyledons | Asparagaceae | <i>Maianthemum</i> | <i>Maianthemum atropurpureum</i> | MengY-n208      | JF977017 | JN045439 | JF942495 | JF954589 |
| Monocotyledons | Asparagaceae | <i>Maianthemum</i> | <i>Maianthemum atropurpureum</i> | MengY-z13       | JF977012 | JN045434 | JF942493 | JF954585 |
| Monocotyledons | Asparagaceae | <i>Maianthemum</i> | <i>Maianthemum atropurpureum</i> | Nie_ & Meng_309 | EU850016 | EU850223 | EU850082 | EU850255 |
| Monocotyledons | Poaceae      | <i>Kengyilia</i>   | <i>Kengyilia thoroldiana</i>     | ZYH-2884        | JF976751 | JN045122 | JF942193 | JF954283 |
| Monocotyledons | Poaceae      | <i>Kengyilia</i>   | <i>Kengyilia thoroldiana</i>     | ZYH-2888        | JF976750 | JN045121 | JF942192 | JF954282 |
| Monocotyledons | Poaceae      | <i>Kengyilia</i>   | <i>Kengyilia thoroldiana</i>     | PI531686        | EF011703 | HQ652814 | HQ65272  | HQ65264  |
| Monocotyledons | Poaceae      | <i>Kengyilia</i>   | <i>Kengyilia thoroldiana</i>     | ZYH-2878        | JF976752 | JN045123 | JF942194 | JF954284 |
| Monocotyledons | Poaceae      | <i>Kengyilia</i>   | <i>Kengyilia stenachyra</i>      | ZYH-2128        | JF976749 | JN045120 | JF942191 | JF954281 |
| Monocotyledons | Poaceae      | <i>Kengyilia</i>   | <i>Kengyilia stenachyra</i>      | W622128         | EF011702 | HQ652820 | HQ65273  | HQ65265  |
| Monocotyledons | Poaceae      | <i>Kengyilia</i>   | <i>Kengyilia stenachyra</i>      | ZYH-2305        | JF976748 | JN045119 | JF942190 | JF954280 |
| Monocotyledons | Poaceae      | <i>Kengyilia</i>   | <i>Kengyilia stenachyra</i>      | ZYH-3122        | JF976747 | JN045118 | JF942189 | JF954279 |
| Monocotyledons | Poaceae      | <i>Kengyilia</i>   | <i>Kengyilia rigidula</i>        | ZYH-3111        | JF976746 | JN045117 | JF942188 | JF954278 |
| Monocotyledons | Poaceae      | <i>Kengyilia</i>   | <i>Kengyilia rigidula</i>        | W622130         | EF011701 | HQ652830 | HQ65273  | HQ65265  |
| Monocotyledons | Poaceae      | <i>Kengyilia</i>   | <i>Kengyilia rigidula</i>        | ZYH-3127        | JF976744 | JN045115 | JF942186 | JF954276 |
| Monocotyledons | Poaceae      | <i>Kengyilia</i>   | <i>Kengyilia rigidula</i>        | ZYH-3113        | JF976745 | JN045116 | JF942187 | JF954277 |
| Monocotyledons | Poaceae      | <i>Kengyilia</i>   | <i>Kengyilia rigidula</i>        | ZY3113          | AY740887 | HQ221849 | HQ65275  | HQ65267  |
| Monocotyledons | Poaceae      | <i>Kengyilia</i>   | <i>Kengyilia mutica</i>          | ZYH-2875        | JF976743 | JN045114 | JF942185 | JF954275 |
| Monocotyledons | Poaceae      | <i>Kengyilia</i>   | <i>Kengyilia mutica</i>          | ZYH-2889        | JF976742 | JN045113 | JF942184 | JF954274 |
| Monocotyledons | Poaceae      | <i>Kengyilia</i>   | <i>Kengyilia mutica</i>          | Y2873           | EF011707 | HQ652867 | HQ65273  | HQ65265  |
| Monocotyledons | Poaceae      | <i>Kengyilia</i>   | <i>Kengyilia melanthera</i>      | ZYH-9509        | JF976737 | JN045108 | JF942179 | JF954269 |
| Monocotyledons | Poaceae      | <i>Kengyilia</i>   | <i>Kengyilia melanthera</i>      | ZYH-2708        | JF976739 | JN045110 | JF942181 | JF954271 |
| Monocotyledons | Poaceae      | <i>Kengyilia</i>   | <i>Kengyilia melanthera</i>      | ZYH-3044        | JF976738 | JN045109 | JF942180 | JF954270 |
| Monocotyledons | Poaceae      | <i>Kengyilia</i>   | <i>Kengyilia longiglumis</i>     | ZY3119          | EF011697 | HQ652863 | HQ65275  | HQ65267  |
| Monocotyledons | Poaceae      | <i>Kengyilia</i>   | <i>Kengyilia longiglumis</i>     | ZYH-3104        | JF976736 | JN045107 | JF942178 | JF954268 |
| Monocotyledons | Poaceae      | <i>Kengyilia</i>   | <i>Kengyilia longiglumis</i>     | ZYH-3119        | JF976735 | JN045106 | JF942177 | JF954267 |
| Monocotyledons | Poaceae      | <i>Kengyilia</i>   | <i>Kengyilia longiglumis</i>     | ZYH-3121        | JF976734 | JN045105 | JF942176 | JF954266 |
| Monocotyledons | Poaceae      | <i>Kengyilia</i>   | <i>Kengyilia laxiflora</i>       | ZYH-8242        | JF976733 | JN045104 | JF942175 | JF954265 |
| Monocotyledons | Poaceae      | <i>Kengyilia</i>   | <i>Kengyilia laxiflora</i>       | ZYH-8243        | JF976732 | JN045103 | JF942174 | JF954264 |
| Monocotyledons | Poaceae      | <i>Kengyilia</i>   | <i>Kengyilia kokonorica</i>      | Y2880           | EF011706 | HQ652857 | HQ65274  | HQ65266  |
| Monocotyledons | Poaceae      | <i>Kengyilia</i>   | <i>Kengyilia kokonorica</i>      | ZYH-2880        | JF976729 | JN045099 | JF942171 | JF954260 |
| Monocotyledons | Poaceae      | <i>Kengyilia</i>   | <i>Kengyilia kokonorica</i>      | ZYH-2980        | JF976728 | JN045098 | JF942170 | JF954259 |
| Monocotyledons | Poaceae      | <i>Kengyilia</i>   | <i>Kengyilia kokonorica</i>      | ZYH-2870        | JF976731 | JN045101 | JF942173 | JF954262 |
| Monocotyledons | Poaceae      | <i>Kengyilia</i>   | <i>Kengyilia kokonorica</i>      | ZYH-2872        | JF976730 | JN045100 | JF942172 | JF954261 |
| Monocotyledons | Poaceae      | <i>Kengyilia</i>   | <i>Kengyilia hirsuta</i>         | ZYH-2368        | JF976726 | JN045096 | JF942168 | JF954257 |
| Monocotyledons | Poaceae      | <i>Kengyilia</i>   | <i>Kengyilia hirsuta</i>         | ZYH-1618        | JF976727 | JN045097 | JF942169 | JF954258 |
| Monocotyledons | Poaceae      | <i>Kengyilia</i>   | <i>Kengyilia hirsuta</i>         | ZYH-3068        | JF976725 | JN045095 | JF942167 | JF954256 |
| Monocotyledons | Poaceae      | <i>Kengyilia</i>   | <i>Kengyilia grandiglumis</i>    | ZYH-2853        | JF976724 | JN045094 | JF942166 | JF954255 |



|                |                |                  |                                 |                       |          |          |          |          |
|----------------|----------------|------------------|---------------------------------|-----------------------|----------|----------|----------|----------|
| Monocotyledons | Poaceae        | <i>Kengyilia</i> | <i>Kengyilia grandiglumis</i>   | ZYH-2857              | JF976722 | JN045092 | JF942164 | JF954253 |
| Monocotyledons | Poaceae        | <i>Kengyilia</i> | <i>Kengyilia grandiglumis</i>   | ZYH-2856              | JF976723 | JN045093 | JF942165 | JF954254 |
| Monocotyledons | Poaceae        | <i>Kengyilia</i> | <i>Kengyilia gobicola</i>       | Y9503                 | EF015600 | HQ652850 | HQ65276  | HQ65268  |
| Monocotyledons | Poaceae        | <i>Kengyilia</i> | <i>Kengyilia gobicola</i>       | ZYH-9502              | JF976721 | JN045091 | JF942163 | JF954252 |
| Monocotyledons | Poaceae        | <i>Kengyilia</i> | <i>Kengyilia gobicola</i>       | ZYH-9503              | JF976720 | JN045090 | JF942162 | JF954251 |
| Monocotyledons | Poaceae        | <i>Kengyilia</i> | <i>Kengyilia geminata</i>       | ZYH-3096              | JF976719 | JN045089 | JF942161 | JF954250 |
| Monocotyledons | Poaceae        | <i>Kengyilia</i> | <i>Kengyilia geminata</i>       | ZYH-3097              | JF976718 | JN045088 | JF942160 | JF954249 |
| Monocotyledons | Poaceae        | <i>Kengyilia</i> | <i>Kengyilia batalinii</i>      | PI565002              | EF011693 | HQ652846 | HQ65275  | HQ65268  |
| Monocotyledons | Poaceae        | <i>Kengyilia</i> | <i>Kengyilia batalinii</i>      | ZYH-7361              | JF976715 | JN045085 | JF942157 | JF954246 |
| Monocotyledons | Poaceae        | <i>Kengyilia</i> | <i>Kengyilia batalinii</i>      | ZYH-5002              | JF976716 | JN045086 | JF942158 | JF954247 |
| Monocotyledons | Poaceae        | <i>Kengyilia</i> | <i>Kengyilia batalinii</i>      | ZYH-1563              | JF976717 | JN045087 | JF942159 | JF954248 |
| Monocotyledons | Poaceae        | <i>Kengyilia</i> | <i>Kengyilia alataavica</i>     | ZYH-1562              | JF976714 | JN045084 | JF942156 | JF954245 |
| Monocotyledons | Poaceae        | <i>Kengyilia</i> | <i>Kengyilia alataavica</i>     | PI565001              | EF011694 | HQ652842 | HQ65275  | HQ65267  |
| Monocotyledons | Poaceae        | <i>Kengyilia</i> | <i>Kengyilia alataavica</i>     | ZYH-5001              | JF976713 | JN045083 | JF942155 | JF954244 |
| Monocotyledons | Araceae        | <i>Arisaema</i>  | <i>Arisaema flavum</i>          | D1472                 | JF975899 | JN043994 | JF940894 | JF953250 |
| Monocotyledons | Araceae        | <i>Arisaema</i>  | <i>Arisaema flavum</i>          | D1012                 | JF975900 | JN043995 | JF940896 | JF953251 |
| Monocotyledons | Araceae        | <i>Arisaema</i>  | <i>Arisaema erubescens</i>      | D300                  | JF975892 | JN043992 | JF940887 | JF953245 |
| Monocotyledons | Araceae        | <i>Arisaema</i>  | <i>Arisaema erubescens</i>      | A65                   | JF975897 | JN043993 | JF940892 | JF953249 |
| Monocotyledons | Zingiberaceae  | <i>Alpinia</i>   | <i>Alpinia zerumbet</i>         | PS0532MT04            | GU180368 | GU180445 | GU18054  | GU18041  |
| Monocotyledons | Zingiberaceae  | <i>Alpinia</i>   | <i>Alpinia zerumbet</i>         | PS0532MT03            | GU180367 | GU180444 | GU18053  | GU18041  |
| Monocotyledons | Zingiberaceae  | <i>Alpinia</i>   | <i>Alpinia officinarum</i>      | PS0519MT01            | GQ434443 | GU180427 | GU18051  | GU18039  |
| Monocotyledons | Zingiberaceae  | <i>Alpinia</i>   | <i>Alpinia officinarum</i>      | PS0519MT04            | GU180360 | GU180428 | GU18051  | GU18039  |
| Monocotyledons | Zingiberaceae  | <i>Alpinia</i>   | <i>Alpinia galanga</i>          | PS0515MT05            | GQ434441 | GQ43504  | GQ43640  | GU18038  |
| Monocotyledons | Zingiberaceae  | <i>Alpinia</i>   | <i>Alpinia galanga</i>          | PS0515MT04            | GU180358 | GU180424 | GU18051  | GU18038  |
| Monocotyledons | Zingiberaceae  | <i>Alpinia</i>   | <i>Alpinia galanga</i>          | PS0515MT03            | GU180357 | GQ43504  | GU18051  | GU18038  |
| Monocotyledons | Zingiberaceae  | <i>Alpinia</i>   | <i>Alpinia galanga</i>          | PS0515MT02            | GU180356 | GQ43503  | GU18051  | GU18038  |
| Monocotyledons | Amaryllidaceae | <i>Allium</i>    | <i>Allium przewalskianum</i>    | Wei X-Q WXQ2009072702 | HQ690282 | HQ690381 | HQ69050  | HQ69033  |
| Monocotyledons | Amaryllidaceae | <i>Allium</i>    | <i>Allium przewalskianum</i>    | Wei X-Q 2009072802    | HQ690281 | HQ690380 | HQ69050  | HQ69032  |
| Monocotyledons | Amaryllidaceae | <i>Allium</i>    | <i>Allium przewalskianum</i>    | Wang C-B 09098        | HQ690568 | HQ690633 | HQ69045  | HQ69071  |
| Monocotyledons | Amaryllidaceae | <i>Allium</i>    | <i>Allium przewalskianum</i>    | Wei X-Q WXQ2009072505 | HQ690283 | HQ690382 | HQ69050  | HQ69033  |
| Monocotyledons | Alismataceae   | <i>Alisma</i>    | <i>Alisma plantago-aquatica</i> | WQF2083               | JF975838 | JN043783 | JF940699 | JF953060 |
| Monocotyledons | Alismataceae   | <i>Alisma</i>    | <i>Alisma plantago-aquatica</i> | WQF2086               | JF975837 | JN043782 | JF940698 | JF953059 |
| Monocotyledons | Alismataceae   | <i>Alisma</i>    | <i>Alisma plantago-aquatica</i> | WQF2147               | JF975833 | JN043778 | JF940694 | JF953058 |
| Monocotyledons | Alismataceae   | <i>Alisma</i>    | <i>Alisma gramineum</i>         | WQF2160               | JF975831 | JN043776 | JF940692 | JF953056 |
| Monocotyledons | Alismataceae   | <i>Alisma</i>    | <i>Alisma gramineum</i>         | WQF2053               | JF975832 | JN043777 | JF940693 | JF953057 |
