# Supplementary material for: Utility of the trnH–psbA Intergenic Spacer Region and Its Combinations as Plant DNA Barcodes: A Meta-Analysis
Source: PubMed Central journal article supplement (PMC3498263; doi:10.1371/journal.pone.0048833), 2012-11-14
Supplement: pone.0048833.s005.pdf [file pone.0048833.s005.pdf]

**Table S5.** Percentages of species with inversions in different families.

| <b>Family</b>    | <b>No. of species</b> | <b>No. of sequences</b> | <b>No. of species having inversions in their sequences</b> | <b>Percentage of species having inversions (%)</b> |
|------------------|-----------------------|-------------------------|------------------------------------------------------------|----------------------------------------------------|
| Heliconiaceae    | 2                     | 4                       | 2                                                          | 100.0                                              |
| Melianthaceae    | 3                     | 10                      | 2                                                          | 66.7                                               |
| Podocarpaceae    | 2                     | 13                      | 1                                                          | 50.0                                               |
| Papaveraceae     | 2                     | 5                       | 1                                                          | 50.0                                               |
| Loranthaceae     | 10                    | 37                      | 5                                                          | 50.0                                               |
| Hypoxiaceae      | 2                     | 123                     | 1                                                          | 50.0                                               |
| Stemonaceae      | 2                     | 5                       | 1                                                          | 50.0                                               |
| Arecaceae        | 19                    | 66                      | 8                                                          | 42.1                                               |
| Saxifragaceae    | 10                    | 102                     | 4                                                          | 40.0                                               |
| Polytrichaceae   | 3                     | 12                      | 1                                                          | 33.3                                               |
| Paeoniaceae      | 6                     | 36                      | 2                                                          | 33.3                                               |
| Gesneriaceae     | 18                    | 45                      | 6                                                          | 33.3                                               |
| Lamiaceae        | 100                   | 429                     | 30                                                         | 30.0                                               |
| Hyacinthaceae    | 10                    | 59                      | 3                                                          | 30.0                                               |
| Oleaceae         | 54                    | 308                     | 15                                                         | 27.8                                               |
| Gentianaceae     | 19                    | 56                      | 5                                                          | 26.3                                               |
| Onagraceae       | 4                     | 11                      | 1                                                          | 25.0                                               |
| Melanthiaceae    | 25                    | 132                     | 6                                                          | 24.0                                               |
| Ranunculaceae    | 65                    | 363                     | 13                                                         | 20.0                                               |
| Brassicaceae     | 20                    | 84                      | 4                                                          | 20.0                                               |
| Melastomataceae  | 5                     | 15                      | 1                                                          | 20.0                                               |
| Araceae          | 26                    | 97                      | 5                                                          | 19.2                                               |
| Rutaceae         | 11                    | 47                      | 2                                                          | 18.2                                               |
| Bromeliaceae     | 39                    | 94                      | 7                                                          | 17.9                                               |
| Hydrocharitaceae | 6                     | 26                      | 1                                                          | 16.7                                               |
| Caryophyllaceae  | 19                    | 247                     | 3                                                          | 15.8                                               |
| Meliaceae        | 7                     | 32                      | 1                                                          | 14.3                                               |
| Polygonaceae     | 29                    | 148                     | 4                                                          | 13.8                                               |
| Apiaceae         | 29                    | 103                     | 4                                                          | 13.8                                               |
| Crassulaceae     | 9                     | 32                      | 1                                                          | 11.1                                               |
| Moraceae         | 30                    | 502                     | 3                                                          | 10.0                                               |
| Potamogetonaceae | 10                    | 25                      | 1                                                          | 10.0                                               |
| Cephalotaxaceae  | 10                    | 59                      | 1                                                          | 10.0                                               |
| Tamaricaceae     | 11                    | 56                      | 1                                                          | 9.1                                                |
| Fagaceae         | 23                    | 173                     | 2                                                          | 8.7                                                |
| Malvaceae        | 59                    | 232                     | 5                                                          | 8.5                                                |
| Loasaceae        | 24                    | 88                      | 2                                                          | 8.3                                                |
| Asparagaceae     | 28                    | 142                     | 2                                                          | 7.1                                                |
| Phyllanthaceae   | 14                    | 53                      | 1                                                          | 7.1                                                |
| Plantaginaceae   | 43                    | 720                     | 3                                                          | 7.0                                                |
| Rosaceae         | 130                   | 580                     | 9                                                          | 6.9                                                |
| Caprifoliaceae   | 15                    | 73                      | 1                                                          | 6.7                                                |
| Iridaceae        | 31                    | 128                     | 2                                                          | 6.5                                                |
| Fabaceae         | 130                   | 515                     | 8                                                          | 6.2                                                |
| Solanaceae       | 82                    | 746                     | 5                                                          | 6.1                                                |
| Orobanchaceae    | 121                   | 508                     | 7                                                          | 5.8                                                |
| Pinaceae         | 62                    | 359                     | 3                                                          | 4.8                                                |
| Ericaceae        | 145                   | 785                     | 7                                                          | 4.8                                                |
| Primulaceae      | 102                   | 361                     | 4                                                          | 3.9                                                |
| Begoniaceae      | 29                    | 144                     | 1                                                          | 3.4                                                |
| Rubiaceae        | 59                    | 199                     | 2                                                          | 3.4                                                |
| Vitaceae         | 92                    | 423                     | 3                                                          | 3.3                                                |
| Orchidaceae      | 188                   | 488                     | 6                                                          | 3.2                                                |

|                  |     |      |   |     |
|------------------|-----|------|---|-----|
| Celastraceae     | 35  | 232  | 1 | 2.9 |
| Poaceae          | 110 | 494  | 3 | 2.7 |
| Asteraceae       | 282 | 1654 | 4 | 1.4 |
| Cucurbitaceae    | 84  | 475  | 1 | 1.2 |
| Dicranaceae      | 3   | 64   | 0 | 0.0 |
| Mniaceae         | 3   | 9    | 0 | 0.0 |
| Polypodiaceae    | 3   | 9    | 0 | 0.0 |
| Cupressaceae     | 15  | 73   | 0 | 0.0 |
| Ephedraceae      | 6   | 15   | 0 | 0.0 |
| Betulaceae       | 47  | 205  | 0 | 0.0 |
| Amaranthaceae    | 12  | 77   | 0 | 0.0 |
| Cactaceae        | 30  | 117  | 0 | 0.0 |
| Rhamnaceae       | 2   | 7    | 0 | 0.0 |
| Passifloraceae   | 8   | 41   | 0 | 0.0 |
| Salicaceae       | 25  | 59   | 0 | 0.0 |
| Sapotaceae       | 17  | 45   | 0 | 0.0 |
| Myrtaceae        | 13  | 34   | 0 | 0.0 |
| Combretaceae     | 6   | 16   | 0 | 0.0 |
| Santalaceae      | 2   | 8    | 0 | 0.0 |
| Euphorbiaceae    | 5   | 13   | 0 | 0.0 |
| Linaceae         | 3   | 15   | 0 | 0.0 |
| Anacardiaceae    | 3   | 9    | 0 | 0.0 |
| Burseraceae      | 23  | 375  | 0 | 0.0 |
| Geraniaceae      | 4   | 10   | 0 | 0.0 |
| Oxalidaceae      | 5   | 31   | 0 | 0.0 |
| Araliaceae       | 34  | 124  | 0 | 0.0 |
| Apocynaceae      | 19  | 51   | 0 | 0.0 |
| Convolvulaceae   | 8   | 69   | 0 | 0.0 |
| Acanthaceae      | 7   | 24   | 0 | 0.0 |
| Adoxaceae        | 22  | 99   | 0 | 0.0 |
| Aquifoliaceae    | 13  | 44   | 0 | 0.0 |
| Proteaceae       | 2   | 6    | 0 | 0.0 |
| Campanulaceae    | 12  | 40   | 0 | 0.0 |
| Platanaceae      | 3   | 16   | 0 | 0.0 |
| Plumbaginaceae   | 3   | 57   | 0 | 0.0 |
| Alismataceae     | 10  | 51   | 0 | 0.0 |
| Cyperaceae       | 24  | 66   | 0 | 0.0 |
| Musaceae         | 17  | 72   | 0 | 0.0 |
| Zingiberaceae    | 79  | 297  | 0 | 0.0 |
| Amaryllidaceae   | 15  | 36   | 0 | 0.0 |
| Dioscoreaceae    | 31  | 197  | 0 | 0.0 |
| Liliaceae        | 51  | 258  | 0 | 0.0 |
| Smilacaceae      | 3   | 10   | 0 | 0.0 |
| Pandanaceae      | 2   | 5    | 0 | 0.0 |
| Typhaceae        | 2   | 6    | 0 | 0.0 |
| Commelinaceae    | 3   | 7    | 0 | 0.0 |
| Sphagnaceae      | 2   | 4    | 0 | 0.0 |
| Pteridaceae      | 21  | 70   | 0 | 0.0 |
| Juncaceae        | 2   | 5    | 0 | 0.0 |
| Juglandaceae     | 5   | 11   | 0 | 0.0 |
| Ebenaceae        | 3   | 7    | 0 | 0.0 |
| Styracaceae      | 2   | 5    | 0 | 0.0 |
| Symplocaceae     | 5   | 204  | 0 | 0.0 |
| Boraginaceae     | 2   | 48   | 0 | 0.0 |
| Verbenaceae      | 2   | 4    | 0 | 0.0 |
| Chrysobalanaceae | 6   | 14   | 0 | 0.0 |

|                  |    |     |   |     |
|------------------|----|-----|---|-----|
| Grossulariaceae  | 10 | 32  | 0 | 0.0 |
| Hydrangeaceae    | 13 | 36  | 0 | 0.0 |
| Violaceae        | 7  | 14  | 0 | 0.0 |
| Taxaceae         | 15 | 68  | 0 | 0.0 |
| Araucariaceae    | 16 | 46  | 0 | 0.0 |
| Balsaminaceae    | 2  | 4   | 0 | 0.0 |
| Cymodoceaceae    | 2  | 13  | 0 | 0.0 |
| Elaeagnaceae     | 2  | 10  | 0 | 0.0 |
| Elaeocarpaceae   | 2  | 4   | 0 | 0.0 |
| Eriocaulaceae    | 2  | 6   | 0 | 0.0 |
| Loganiaceae      | 4  | 13  | 0 | 0.0 |
| Nothofagaceae    | 8  | 47  | 0 | 0.0 |
| Theaceae         | 19 | 65  | 0 | 0.0 |
| Xanthorrhoeaceae | 9  | 29  | 0 | 0.0 |
| Zosteraceae      | 3  | 8   | 0 | 0.0 |
| Dryopteridaceae  | 26 | 64  | 0 | 0.0 |
| Hymenophyllaceae | 9  | 34  | 0 | 0.0 |
| Lindsaeaceae     | 24 | 56  | 0 | 0.0 |
| Lomariopsidaceae | 2  | 4   | 0 | 0.0 |
| Brachytheciaceae | 4  | 12  | 0 | 0.0 |
| Thymelaeaceae    | 5  | 56  | 0 | 0.0 |
| Colchicaceae     | 25 | 61  | 0 | 0.0 |
| Berberidaceae    | 14 | 83  | 0 | 0.0 |
| Aspleniaceae     | 6  | 18  | 0 | 0.0 |
| Hamamelidaceae   | 9  | 61  | 0 | 0.0 |
| Cornaceae        | 13 | 46  | 0 | 0.0 |
| Acoraceae        | 4  | 44  | 0 | 0.0 |
| Zygophyllaceae   | 8  | 122 | 0 | 0.0 |
| Orthotrichaceae  | 12 | 41  | 0 | 0.0 |
| Hypnaceae        | 4  | 9   | 0 | 0.0 |
| Grimmiaceae      | 17 | 116 | 0 | 0.0 |
| Caryocaraceae    | 4  | 104 | 0 | 0.0 |
| Stachyuraceae    | 3  | 10  | 0 | 0.0 |
| Altingiaceae     | 4  | 33  | 0 | 0.0 |
| Nitrariaceae     | 6  | 23  | 0 | 0.0 |
| Ptychomniaceae   | 4  | 10  | 0 | 0.0 |
| Woodsiaceae      | 4  | 20  | 0 | 0.0 |
| Hypericaceae     | 2  | 5   | 0 | 0.0 |
| Lygodiaceae      | 3  | 17  | 0 | 0.0 |
| Aceraceae        | 19 | 445 | 0 | 0.0 |
