# Supplementary material for: Utility of the trnH–psbA Intergenic Spacer Region and Its Combinations as Plant DNA Barcodes: A Meta-Analysis
Source: PubMed Central journal article supplement (PMC3498263; doi:10.1371/journal.pone.0048833), 2012-11-14
Supplement: pone.0048833.s006.pdf [file pone.0048833.s006.pdf]

**Table S6.** Percentages of species with inversions in different genera.

| <b>Genus</b>         | <b>No. of species</b> | <b>No. of sequence</b> | <b>No. of species having inversions in their sequences</b> | <b>Percentage of species having inversions (%)</b> |
|----------------------|-----------------------|------------------------|------------------------------------------------------------|----------------------------------------------------|
| <i>Heliconia</i>     | 2                     | 4                      | 2                                                          | 100.0                                              |
| <i>Gentianopsis</i>  | 3                     | 9                      | 3                                                          | 100.0                                              |
| <i>Helixanthera</i>  | 2                     | 7                      | 2                                                          | 100.0                                              |
| <i>Wallichia</i>     | 2                     | 5                      | 2                                                          | 100.0                                              |
| <i>Cristaria</i>     | 2                     | 4                      | 2                                                          | 100.0                                              |
| <i>Mentha</i>        | 9                     | 85                     | 7                                                          | 77.8                                               |
| <i>Chaenomeles</i>   | 3                     | 10                     | 2                                                          | 66.7                                               |
| <i>Melianthus</i>    | 3                     | 10                     | 2                                                          | 66.7                                               |
| <i>Conradina</i>     | 6                     | 20                     | 4                                                          | 66.7                                               |
| <i>Origanum</i>      | 5                     | 22                     | 3                                                          | 60.0                                               |
| <i>Thymus</i>        | 5                     | 25                     | 3                                                          | 60.0                                               |
| <i>Podocarpus</i>    | 2                     | 13                     | 1                                                          | 50.0                                               |
| <i>Papaver</i>       | 2                     | 5                      | 1                                                          | 50.0                                               |
| <i>Capsella</i>      | 4                     | 13                     | 2                                                          | 50.0                                               |
| <i>Euonymus</i>      | 2                     | 29                     | 1                                                          | 50.0                                               |
| <i>Thinopyrum</i>    | 2                     | 37                     | 1                                                          | 50.0                                               |
| <i>Cymbidium</i>     | 2                     | 4                      | 1                                                          | 50.0                                               |
| <i>Eranthis</i>      | 4                     | 41                     | 2                                                          | 50.0                                               |
| <i>Schizolobium</i>  | 2                     | 12                     | 1                                                          | 50.0                                               |
| <i>Pitcairnia</i>    | 2                     | 4                      | 1                                                          | 50.0                                               |
| <i>Cardamine</i>     | 4                     | 15                     | 2                                                          | 50.0                                               |
| <i>Pauridia</i>      | 2                     | 123                    | 1                                                          | 50.0                                               |
| <i>Stemona</i>       | 2                     | 5                      | 1                                                          | 50.0                                               |
| <i>Arenga</i>        | 8                     | 30                     | 4                                                          | 50.0                                               |
| <i>Bistorta</i>      | 2                     | 12                     | 1                                                          | 50.0                                               |
| <i>Oxyria</i>        | 2                     | 56                     | 1                                                          | 50.0                                               |
| <i>Wolffia</i>       | 4                     | 18                     | 2                                                          | 50.0                                               |
| <i>Brosimum</i>      | 2                     | 212                    | 1                                                          | 50.0                                               |
| <i>Macrosolen</i>    | 2                     | 6                      | 1                                                          | 50.0                                               |
| <i>Scurrula</i>      | 2                     | 5                      | 1                                                          | 50.0                                               |
| <i>Chamerion</i>     | 2                     | 7                      | 1                                                          | 50.0                                               |
| <i>Phlomis</i>       | 2                     | 27                     | 1                                                          | 50.0                                               |
| <i>Caesalpinia</i>   | 7                     | 75                     | 3                                                          | 42.9                                               |
| <i>Festuca</i>       | 5                     | 20                     | 2                                                          | 40.0                                               |
| <i>Caryota</i>       | 5                     | 21                     | 2                                                          | 40.0                                               |
| <i>Mitella</i>       | 10                    | 102                    | 4                                                          | 40.0                                               |
| <i>Clinopodium</i>   | 5                     | 13                     | 2                                                          | 40.0                                               |
| <i>Fraxinus</i>      | 37                    | 213                    | 14                                                         | 37.8                                               |
| <i>Silene</i>        | 8                     | 197                    | 3                                                          | 37.5                                               |
| <i>Cyrtandra</i>     | 16                    | 41                     | 6                                                          | 37.5                                               |
| <i>Aechmea</i>       | 14                    | 36                     | 5                                                          | 35.7                                               |
| <i>Polytrichum</i>   | 3                     | 12                     | 1                                                          | 33.3                                               |
| <i>Coptis</i>        | 6                     | 39                     | 2                                                          | 33.3                                               |
| <i>Ranunculus</i>    | 6                     | 15                     | 2                                                          | 33.3                                               |
| <i>Paeonia</i>       | 6                     | 36                     | 2                                                          | 33.3                                               |
| <i>Billbergia</i>    | 3                     | 8                      | 1                                                          | 33.3                                               |
| <i>Valeriana</i>     | 3                     | 13                     | 1                                                          | 33.3                                               |
| <i>Schotia</i>       | 6                     | 49                     | 2                                                          | 33.3                                               |
| <i>Salvia</i>        | 18                    | 49                     | 6                                                          | 33.3                                               |
| <i>Aeonium</i>       | 3                     | 6                      | 1                                                          | 33.3                                               |
| <i>Angelica</i>      | 3                     | 9                      | 1                                                          | 33.3                                               |
| <i>Hypochaeris</i>   | 3                     | 88                     | 1                                                          | 33.3                                               |
| <i>Melastoma</i>     | 3                     | 10                     | 1                                                          | 33.3                                               |
| <i>Carapa</i>        | 3                     | 18                     | 1                                                          | 33.3                                               |
| <i>Isodon</i>        | 12                    | 55                     | 4                                                          | 33.3                                               |
| <i>Aconitum</i>      | 22                    | 170                    | 7                                                          | 31.8                                               |
| <i>Paris</i>         | 16                    | 81                     | 5                                                          | 31.3                                               |
| <i>Hyacinthoides</i> | 10                    | 59                     | 3                                                          | 30.0                                               |
| <i>Citrus</i>        | 7                     | 36                     | 2                                                          | 28.6                                               |

|                     |     |     |   |      |
|---------------------|-----|-----|---|------|
| <i>Lenna</i>        | 7   | 29  | 2 | 28.6 |
| <i>Rubus</i>        | 7   | 39  | 2 | 28.6 |
| <i>Canavalia</i>    | 4   | 15  | 1 | 25.0 |
| <i>Pyracantha</i>   | 4   | 23  | 1 | 25.0 |
| <i>Cayratia</i>     | 4   | 15  | 1 | 25.0 |
| <i>Taxillus</i>     | 4   | 19  | 1 | 25.0 |
| <i>Agalinis</i>     | 27  | 90  | 6 | 22.2 |
| <i>Veronica</i>     | 10  | 70  | 2 | 20.0 |
| <i>Asparagus</i>    | 5   | 29  | 1 | 20.0 |
| <i>Polygonum</i>    | 5   | 19  | 1 | 20.0 |
| <i>Ampelopsis</i>   | 10  | 36  | 2 | 20.0 |
| <i>Wolffiella</i>   | 5   | 20  | 1 | 20.0 |
| <i>Petunia</i>      | 12  | 507 | 2 | 16.7 |
| <i>Najas</i>        | 6   | 26  | 1 | 16.7 |
| <i>Gentiana</i>     | 6   | 14  | 1 | 16.7 |
| <i>Heracleum</i>    | 6   | 17  | 1 | 16.7 |
| <i>Peucedanum</i>   | 6   | 19  | 1 | 16.7 |
| <i>Veratrum</i>     | 6   | 45  | 1 | 16.7 |
| <i>Althaea</i>      | 6   | 23  | 1 | 16.7 |
| <i>Cliffortia</i>   | 13  | 26  | 2 | 15.4 |
| <i>Polygonatum</i>  | 7   | 31  | 1 | 14.3 |
| <i>Malva</i>        | 14  | 72  | 2 | 14.3 |
| <i>Encelia</i>      | 7   | 20  | 1 | 14.3 |
| <i>Potentilla</i>   | 15  | 89  | 2 | 13.3 |
| <i>Castanopsis</i>  | 15  | 54  | 2 | 13.3 |
| <i>Oncidium</i>     | 39  | 93  | 5 | 12.8 |
| <i>Osmorhiza</i>    | 8   | 31  | 1 | 12.5 |
| <i>Oldenlandia</i>  | 9   | 39  | 1 | 11.1 |
| <i>Pinus</i>        | 20  | 102 | 2 | 10.0 |
| <i>Potamogeton</i>  | 10  | 25  | 1 | 10.0 |
| <i>Lycium</i>       | 10  | 32  | 1 | 10.0 |
| <i>Swertia</i>      | 10  | 33  | 1 | 10.0 |
| <i>Cephalotaxus</i> | 10  | 59  | 1 | 10.0 |
| <i>Blumea</i>       | 10  | 22  | 1 | 10.0 |
| <i>Synthyris</i>    | 10  | 549 | 1 | 10.0 |
| <i>Myricaria</i>    | 11  | 56  | 1 | 9.1  |
| <i>Solanum</i>      | 23  | 85  | 2 | 8.7  |
| <i>Mentzelia</i>    | 24  | 88  | 2 | 8.3  |
| <i>Persicaria</i>   | 12  | 37  | 1 | 8.3  |
| <i>Hedyotis</i>     | 13  | 54  | 1 | 7.7  |
| <i>Primula</i>      | 54  | 205 | 4 | 7.4  |
| <i>Ficus</i>        | 28  | 290 | 2 | 7.1  |
| <i>Phyllanthus</i>  | 14  | 53  | 1 | 7.1  |
| <i>Rhododendron</i> | 101 | 351 | 7 | 6.9  |
| <i>Ligustrum</i>    | 15  | 86  | 1 | 6.7  |
| <i>Iris</i>         | 31  | 128 | 2 | 6.5  |
| <i>Picea</i>        | 21  | 123 | 1 | 4.8  |
| <i>Sinosenecio</i>  | 24  | 76  | 1 | 4.2  |
| <i>Inga</i>         | 27  | 84  | 1 | 3.7  |
| <i>Begonia</i>      | 29  | 144 | 1 | 3.4  |
| <i>Momordica</i>    | 30  | 94  | 1 | 3.3  |
| <i>Pedicularis</i>  | 83  | 301 | 1 | 1.2  |
| <i>Dicranum</i>     | 3   | 64  | 0 | 0.0  |
| <i>Plagiomnium</i>  | 3   | 9   | 0 | 0.0  |
| <i>Dryopteris</i>   | 26  | 64  | 0 | 0.0  |
| <i>Abies</i>        | 21  | 134 | 0 | 0.0  |
| <i>Ephedra</i>      | 6   | 15  | 0 | 0.0  |
| <i>Betula</i>       | 4   | 13  | 0 | 0.0  |
| <i>Quercus</i>      | 4   | 102 | 0 | 0.0  |
| <i>Alnus</i>        | 23  | 110 | 0 | 0.0  |
| <i>Chenopodium</i>  | 4   | 31  | 0 | 0.0  |
| <i>Amaranthus</i>   | 5   | 37  | 0 | 0.0  |

|                       |    |     |   |     |
|-----------------------|----|-----|---|-----|
| <i>Dianthus</i>       | 9  | 46  | 0 | 0.0 |
| <i>Cerastium</i>      | 2  | 4   | 0 | 0.0 |
| <i>Vitis</i>          | 31 | 243 | 0 | 0.0 |
| <i>Parthenocissus</i> | 5  | 15  | 0 | 0.0 |
| <i>Rhamnus</i>        | 2  | 7   | 0 | 0.0 |
| <i>Rumex</i>          | 5  | 14  | 0 | 0.0 |
| <i>Rheum</i>          | 3  | 10  | 0 | 0.0 |
| <i>Gossypium</i>      | 4  | 37  | 0 | 0.0 |
| <i>Bryonia</i>        | 10 | 145 | 0 | 0.0 |
| <i>Trichosanthes</i>  | 9  | 38  | 0 | 0.0 |
| <i>Passiflora</i>     | 8  | 41  | 0 | 0.0 |
| <i>Populus</i>        | 5  | 13  | 0 | 0.0 |
| <i>Brassica</i>       | 2  | 5   | 0 | 0.0 |
| <i>Raphanus</i>       | 2  | 9   | 0 | 0.0 |
| <i>Manilkara</i>      | 3  | 8   | 0 | 0.0 |
| <i>Fragaria</i>       | 4  | 10  | 0 | 0.0 |
| <i>Malus</i>          | 3  | 7   | 0 | 0.0 |
| <i>Prunus</i>         | 19 | 89  | 0 | 0.0 |
| <i>Rosa</i>           | 17 | 41  | 0 | 0.0 |
| <i>Parnassia</i>      | 33 | 203 | 0 | 0.0 |
| <i>Ribes</i>          | 10 | 32  | 0 | 0.0 |
| <i>Acacia</i>         | 17 | 67  | 0 | 0.0 |
| <i>Albizia</i>        | 3  | 8   | 0 | 0.0 |
| <i>Leucaena</i>       | 5  | 19  | 0 | 0.0 |
| <i>Trifolium</i>      | 2  | 8   | 0 | 0.0 |
| <i>Wisteria</i>       | 5  | 16  | 0 | 0.0 |
| <i>Eucalyptus</i>     | 3  | 7   | 0 | 0.0 |
| <i>Linum</i>          | 3  | 15  | 0 | 0.0 |
| <i>Bursera</i>        | 15 | 354 | 0 | 0.0 |
| <i>Acer</i>           | 19 | 445 | 0 | 0.0 |
| <i>Geranium</i>       | 4  | 10  | 0 | 0.0 |
| <i>Oxalis</i>         | 5  | 31  | 0 | 0.0 |
| <i>Hydrocotyle</i>    | 4  | 29  | 0 | 0.0 |
| <i>Hedera</i>         | 6  | 15  | 0 | 0.0 |
| <i>Panax</i>          | 7  | 33  | 0 | 0.0 |
| <i>Capsicum</i>       | 12 | 42  | 0 | 0.0 |
| <i>Datura</i>         | 3  | 20  | 0 | 0.0 |
| <i>Hyoscyamus</i>     | 2  | 4   | 0 | 0.0 |
| <i>Convolvulus</i>    | 5  | 61  | 0 | 0.0 |
| <i>Leonurus</i>       | 2  | 6   | 0 | 0.0 |
| <i>Scutellaria</i>    | 5  | 28  | 0 | 0.0 |
| <i>Antirrhinum</i>    | 19 | 65  | 0 | 0.0 |
| <i>Sambucus</i>       | 5  | 29  | 0 | 0.0 |
| <i>Viburnum</i>       | 17 | 70  | 0 | 0.0 |
| <i>Ambrosia</i>       | 2  | 8   | 0 | 0.0 |
| <i>Arctium</i>        | 2  | 6   | 0 | 0.0 |
| <i>Artemisia</i>      | 3  | 8   | 0 | 0.0 |
| <i>Helianthus</i>     | 2  | 5   | 0 | 0.0 |
| <i>Lactuca</i>        | 3  | 9   | 0 | 0.0 |
| <i>Ligularia</i>      | 13 | 41  | 0 | 0.0 |
| <i>Arnica</i>         | 9  | 18  | 0 | 0.0 |
| <i>Cornus</i>         | 6  | 16  | 0 | 0.0 |
| <i>Nyssa</i>          | 7  | 30  | 0 | 0.0 |
| <i>Ilex</i>           | 13 | 44  | 0 | 0.0 |
| <i>Lobelia</i>        | 4  | 10  | 0 | 0.0 |
| <i>Hamamelis</i>      | 4  | 15  | 0 | 0.0 |
| <i>Liquidambar</i>    | 4  | 33  | 0 | 0.0 |
| <i>Platanus</i>       | 3  | 16  | 0 | 0.0 |
| <i>Alocasia</i>       | 2  | 7   | 0 | 0.0 |
| <i>Colocasia</i>      | 2  | 4   | 0 | 0.0 |
| <i>Acorus</i>         | 4  | 44  | 0 | 0.0 |
| <i>Spirodela</i>      | 2  | 10  | 0 | 0.0 |

|                      |    |     |   |     |
|----------------------|----|-----|---|-----|
| <i>Oryza</i>         | 2  | 8   | 0 | 0.0 |
| <i>Panicum</i>       | 2  | 4   | 0 | 0.0 |
| <i>Poa</i>           | 3  | 11  | 0 | 0.0 |
| <i>Setaria</i>       | 2  | 4   | 0 | 0.0 |
| <i>Bambusa</i>       | 7  | 15  | 0 | 0.0 |
| <i>Cenchrus</i>      | 3  | 6   | 0 | 0.0 |
| <i>Cyperus</i>       | 6  | 13  | 0 | 0.0 |
| <i>Musa</i>          | 17 | 72  | 0 | 0.0 |
| <i>Dioscorea</i>     | 25 | 139 | 0 | 0.0 |
| <i>Allium</i>        | 3  | 12  | 0 | 0.0 |
| <i>Lilium</i>        | 2  | 28  | 0 | 0.0 |
| <i>Pandanus</i>      | 2  | 5   | 0 | 0.0 |
| <i>Typha</i>         | 2  | 6   | 0 | 0.0 |
| <i>Commelina</i>     | 3  | 7   | 0 | 0.0 |
| <i>Carpinus</i>      | 8  | 31  | 0 | 0.0 |
| <i>Echinodorus</i>   | 8  | 39  | 0 | 0.0 |
| <i>Epilobium</i>     | 2  | 4   | 0 | 0.0 |
| <i>Halodule</i>      | 2  | 13  | 0 | 0.0 |
| <i>Juniperus</i>     | 10 | 54  | 0 | 0.0 |
| <i>Sabal</i>         | 2  | 4   | 0 | 0.0 |
| <i>Achillea</i>      | 10 | 62  | 0 | 0.0 |
| <i>Ardisia</i>       | 2  | 5   | 0 | 0.0 |
| <i>Carex</i>         | 18 | 53  | 0 | 0.0 |
| <i>Cassiope</i>      | 4  | 14  | 0 | 0.0 |
| <i>Chrysanthemum</i> | 7  | 46  | 0 | 0.0 |
| <i>Chrysophyllum</i> | 3  | 7   | 0 | 0.0 |
| <i>Colchicum</i>     | 19 | 46  | 0 | 0.0 |
| <i>Corylus</i>       | 4  | 9   | 0 | 0.0 |
| <i>Cupressus</i>     | 5  | 19  | 0 | 0.0 |
| <i>Diospyros</i>     | 3  | 7   | 0 | 0.0 |
| <i>Enkianthus</i>    | 2  | 8   | 0 | 0.0 |
| <i>Erica</i>         | 3  | 213 | 0 | 0.0 |
| <i>Eupatorium</i>    | 3  | 9   | 0 | 0.0 |
| <i>Gaultheria</i>    | 29 | 184 | 0 | 0.0 |
| <i>Gazania</i>       | 10 | 20  | 0 | 0.0 |
| <i>Juncus</i>        | 2  | 5   | 0 | 0.0 |
| <i>Ostrya</i>        | 5  | 14  | 0 | 0.0 |
| <i>Ruellia</i>       | 7  | 24  | 0 | 0.0 |
| <i>Syrax</i>         | 2  | 5   | 0 | 0.0 |
| <i>Tragopogon</i>    | 8  | 22  | 0 | 0.0 |
| <i>Viola</i>         | 7  | 14  | 0 | 0.0 |
| <i>Sphagnum</i>      | 2  | 4   | 0 | 0.0 |
| <i>Adiantum</i>      | 3  | 6   | 0 | 0.0 |
| <i>Pteris</i>        | 3  | 9   | 0 | 0.0 |
| <i>Lygodium</i>      | 3  | 17  | 0 | 0.0 |
| <i>Alisma</i>        | 2  | 12  | 0 | 0.0 |
| <i>Tillandsia</i>    | 3  | 6   | 0 | 0.0 |
| <i>Agrostis</i>      | 2  | 5   | 0 | 0.0 |
| <i>Calamagrostis</i> | 3  | 11  | 0 | 0.0 |
| <i>Dendrocalamus</i> | 2  | 5   | 0 | 0.0 |
| <i>Elymus</i>        | 4  | 10  | 0 | 0.0 |
| <i>Stipa</i>         | 2  | 8   | 0 | 0.0 |
| <i>Zizania</i>       | 3  | 25  | 0 | 0.0 |
| <i>Maianthemum</i>   | 13 | 68  | 0 | 0.0 |
| <i>Cyananthus</i>    | 8  | 30  | 0 | 0.0 |
| <i>Juglans</i>       | 5  | 11  | 0 | 0.0 |
| <i>Senecio</i>       | 6  | 18  | 0 | 0.0 |
| <i>Lepidium</i>      | 4  | 26  | 0 | 0.0 |
| <i>Astragalus</i>    | 4  | 19  | 0 | 0.0 |
| <i>Fagus</i>         | 4  | 17  | 0 | 0.0 |
| <i>Asclepias</i>     | 2  | 6   | 0 | 0.0 |
| <i>Glechoma</i>      | 2  | 6   | 0 | 0.0 |

|                        |    |     |   |     |
|------------------------|----|-----|---|-----|
| <i>Teucrium</i>        | 4  | 8   | 0 | 0.0 |
| <i>Verbena</i>         | 2  | 4   | 0 | 0.0 |
| <i>Berberis</i>        | 14 | 83  | 0 | 0.0 |
| <i>Anemone</i>         | 7  | 40  | 0 | 0.0 |
| <i>Licania</i>         | 4  | 10  | 0 | 0.0 |
| <i>Hydrangea</i>       | 11 | 32  | 0 | 0.0 |
| <i>Amelanchier</i>     | 4  | 8   | 0 | 0.0 |
| <i>Crataegus</i>       | 26 | 192 | 0 | 0.0 |
| <i>Photinia</i>        | 5  | 11  | 0 | 0.0 |
| <i>Sorbaria</i>        | 3  | 9   | 0 | 0.0 |
| <i>Mandragora</i>      | 2  | 7   | 0 | 0.0 |
| <i>Galium</i>          | 2  | 5   | 0 | 0.0 |
| <i>Psychotria</i>      | 7  | 18  | 0 | 0.0 |
| <i>Amentotaxus</i>     | 4  | 19  | 0 | 0.0 |
| <i>Taxus</i>           | 7  | 39  | 0 | 0.0 |
| <i>Haworthia</i>       | 9  | 29  | 0 | 0.0 |
| <i>Araucaria</i>       | 16 | 46  | 0 | 0.0 |
| <i>Elaeocarpus</i>     | 2  | 4   | 0 | 0.0 |
| <i>Strychnos</i>       | 4  | 13  | 0 | 0.0 |
| <i>Nolana</i>          | 15 | 38  | 0 | 0.0 |
| <i>Nothofagus</i>      | 8  | 47  | 0 | 0.0 |
| <i>Plantago</i>        | 4  | 36  | 0 | 0.0 |
| <i>Zostera</i>         | 3  | 8   | 0 | 0.0 |
| <i>Crepidomanes</i>    | 4  | 12  | 0 | 0.0 |
| <i>Asplenium</i>       | 6  | 18  | 0 | 0.0 |
| <i>Lindsaea</i>        | 22 | 52  | 0 | 0.0 |
| <i>Odontosoria</i>     | 2  | 4   | 0 | 0.0 |
| <i>Nephrolepis</i>     | 2  | 4   | 0 | 0.0 |
| <i>Impatiens</i>       | 2  | 4   | 0 | 0.0 |
| <i>Santalum</i>        | 2  | 8   | 0 | 0.0 |
| <i>Phalaenopsis</i>    | 3  | 26  | 0 | 0.0 |
| <i>Cheilanthes</i>     | 15 | 55  | 0 | 0.0 |
| <i>Urochloa</i>        | 2  | 5   | 0 | 0.0 |
| <i>Dendrobium</i>      | 18 | 47  | 0 | 0.0 |
| <i>Glyceria</i>        | 12 | 86  | 0 | 0.0 |
| <i>Nassella</i>        | 5  | 13  | 0 | 0.0 |
| <i>Pseudoroegneria</i> | 2  | 4   | 0 | 0.0 |
| <i>Cypripedium</i>     | 6  | 13  | 0 | 0.0 |
| <i>Bulbophyllum</i>    | 13 | 30  | 0 | 0.0 |
| <i>Encyclia</i>        | 2  | 6   | 0 | 0.0 |
| <i>Cattleya</i>        | 4  | 8   | 0 | 0.0 |
| <i>Hymenophyllum</i>   | 3  | 15  | 0 | 0.0 |
| <i>Eragrostis</i>      | 4  | 13  | 0 | 0.0 |
| <i>Ajuga</i>           | 2  | 6   | 0 | 0.0 |
| <i>Sporobolus</i>      | 2  | 4   | 0 | 0.0 |
| <i>Ocimum</i>          | 2  | 17  | 0 | 0.0 |
| <i>Rosmarinus</i>      | 2  | 8   | 0 | 0.0 |
| <i>Lea</i>             | 2  | 5   | 0 | 0.0 |
| <i>Salix</i>           | 18 | 42  | 0 | 0.0 |
| <i>Arctotis</i>        | 18 | 38  | 0 | 0.0 |
| <i>Carlina</i>         | 4  | 8   | 0 | 0.0 |
| <i>Centaurea</i>       | 8  | 65  | 0 | 0.0 |
| <i>Cirsium</i>         | 4  | 11  | 0 | 0.0 |
| <i>Doniophyton</i>     | 2  | 4   | 0 | 0.0 |
| <i>Erigeron</i>        | 3  | 15  | 0 | 0.0 |
| <i>Haplocarpha</i>     | 4  | 8   | 0 | 0.0 |
| <i>Inula</i>           | 4  | 11  | 0 | 0.0 |
| <i>Lychnophora</i>     | 3  | 214 | 0 | 0.0 |
| <i>Saussurea</i>       | 2  | 4   | 0 | 0.0 |
| <i>Santolina</i>       | 10 | 39  | 0 | 0.0 |
| <i>Eryngium</i>        | 2  | 13  | 0 | 0.0 |
| <i>Luculia</i>         | 2  | 10  | 0 | 0.0 |

|                      |    |     |   |     |
|----------------------|----|-----|---|-----|
| <i>Morinda</i>       | 6  | 18  | 0 | 0.0 |
| <i>Mussaenda</i>     | 10 | 30  | 0 | 0.0 |
| <i>Canarium</i>      | 3  | 6   | 0 | 0.0 |
| <i>Nitraria</i>      | 3  | 8   | 0 | 0.0 |
| <i>Peganum</i>       | 3  | 15  | 0 | 0.0 |
| <i>Trichilia</i>     | 2  | 7   | 0 | 0.0 |
| <i>Cipadessa</i>     | 2  | 7   | 0 | 0.0 |
| <i>Tacca</i>         | 6  | 58  | 0 | 0.0 |
| <i>Castilleja</i>    | 3  | 47  | 0 | 0.0 |
| <i>Limonium</i>      | 3  | 57  | 0 | 0.0 |
| <i>Suaeda</i>        | 3  | 9   | 0 | 0.0 |
| <i>Delphinium</i>    | 18 | 46  | 0 | 0.0 |
| <i>Glycyrrhiza</i>   | 2  | 7   | 0 | 0.0 |
| <i>Dendropanax</i>   | 14 | 36  | 0 | 0.0 |
| <i>Schefflera</i>    | 3  | 11  | 0 | 0.0 |
| <i>Pulsatilla</i>    | 2  | 12  | 0 | 0.0 |
| <i>Andira</i>        | 2  | 6   | 0 | 0.0 |
| <i>Hippophae</i>     | 2  | 10  | 0 | 0.0 |
| <i>Hohenbergia</i>   | 2  | 4   | 0 | 0.0 |
| <i>Nidularium</i>    | 5  | 11  | 0 | 0.0 |
| <i>Vriesea</i>       | 10 | 25  | 0 | 0.0 |
| <i>Pleurospermum</i> | 4  | 14  | 0 | 0.0 |
| <i>Lonicera</i>      | 12 | 60  | 0 | 0.0 |
| <i>Erythronium</i>   | 6  | 48  | 0 | 0.0 |
| <i>Smilax</i>        | 3  | 10  | 0 | 0.0 |
| <i>Trillium</i>      | 3  | 6   | 0 | 0.0 |
| <i>Taraxacum</i>     | 2  | 7   | 0 | 0.0 |
| <i>Hypnum</i>        | 4  | 9   | 0 | 0.0 |
| <i>Torreya</i>       | 4  | 10  | 0 | 0.0 |
| <i>Sonchus</i>       | 3  | 15  | 0 | 0.0 |
| <i>Arisaema</i>      | 4  | 9   | 0 | 0.0 |
| <i>Kengyilia</i>     | 15 | 101 | 0 | 0.0 |
| <i>Corylopsis</i>    | 3  | 10  | 0 | 0.0 |
| <i>Pieris</i>        | 6  | 15  | 0 | 0.0 |
| <i>Piptatherum</i>   | 2  | 5   | 0 | 0.0 |
| <i>Alstonia</i>      | 2  | 6   | 0 | 0.0 |
| <i>Orthotrichum</i>  | 10 | 33  | 0 | 0.0 |
| <i>Brachythecium</i> | 4  | 12  | 0 | 0.0 |
| <i>Lamium</i>        | 16 | 46  | 0 | 0.0 |
| <i>Chamaecrista</i>  | 2  | 4   | 0 | 0.0 |
| <i>Dalbergia</i>     | 8  | 31  | 0 | 0.0 |
| <i>Lespedeza</i>     | 4  | 8   | 0 | 0.0 |
| <i>Senna</i>         | 11 | 29  | 0 | 0.0 |
| <i>Vitex</i>         | 3  | 8   | 0 | 0.0 |
| <i>Symplocos</i>     | 5  | 204 | 0 | 0.0 |
| <i>Hypericum</i>     | 2  | 5   | 0 | 0.0 |
| <i>Sanguisorba</i>   | 2  | 6   | 0 | 0.0 |
| <i>Androcymbium</i>  | 6  | 15  | 0 | 0.0 |
| <i>Lloydia</i>       | 2  | 5   | 0 | 0.0 |
| <i>Solidago</i>      | 11 | 314 | 0 | 0.0 |
| <i>Craspedia</i>     | 2  | 4   | 0 | 0.0 |
| <i>Leucogenes</i>    | 3  | 15  | 0 | 0.0 |
| <i>Raoulia</i>       | 2  | 6   | 0 | 0.0 |
| <i>Schima</i>        | 3  | 9   | 0 | 0.0 |
| <i>Stewartia</i>     | 16 | 56  | 0 | 0.0 |
| <i>Lysimachia</i>    | 39 | 112 | 0 | 0.0 |
| <i>Schizophragma</i> | 2  | 4   | 0 | 0.0 |
| <i>Leptodermis</i>   | 8  | 19  | 0 | 0.0 |
| <i>Lavatera</i>      | 7  | 19  | 0 | 0.0 |
| <i>Fockea</i>        | 3  | 9   | 0 | 0.0 |
| <i>Vincetoxicum</i>  | 3  | 6   | 0 | 0.0 |
| <i>Loropetalum</i>   | 2  | 36  | 0 | 0.0 |

|                        |    |     |   |     |
|------------------------|----|-----|---|-----|
| <i>Hemsleya</i>        | 21 | 112 | 0 | 0.0 |
| <i>Schistidium</i>     | 3  | 11  | 0 | 0.0 |
| <i>Alcea</i>           | 9  | 18  | 0 | 0.0 |
| <i>Deparia</i>         | 4  | 20  | 0 | 0.0 |
| <i>Digitaria</i>       | 3  | 7   | 0 | 0.0 |
| <i>Larrea</i>          | 2  | 109 | 0 | 0.0 |
| <i>Zygophyllum</i>     | 6  | 13  | 0 | 0.0 |
| <i>Daphne</i>          | 5  | 56  | 0 | 0.0 |
| <i>Spathelia</i>       | 4  | 11  | 0 | 0.0 |
| <i>Aspalathus</i>      | 2  | 4   | 0 | 0.0 |
| <i>Caryocar</i>        | 4  | 104 | 0 | 0.0 |
| <i>Symphyotrichum</i>  | 9  | 24  | 0 | 0.0 |
| <i>Ostryopsis</i>      | 3  | 28  | 0 | 0.0 |
| <i>Cordia</i>          | 2  | 48  | 0 | 0.0 |
| <i>Couepia</i>         | 2  | 4   | 0 | 0.0 |
| <i>Gagea</i>           | 41 | 177 | 0 | 0.0 |
| <i>Lycoris</i>         | 12 | 24  | 0 | 0.0 |
| <i>Grewia</i>          | 3  | 8   | 0 | 0.0 |
| <i>Grabowskia</i>      | 3  | 11  | 0 | 0.0 |
| <i>Aspidosperma</i>    | 2  | 4   | 0 | 0.0 |
| <i>Pouteria</i>        | 6  | 16  | 0 | 0.0 |
| <i>Stachyurus</i>      | 3  | 10  | 0 | 0.0 |
| <i>Draba</i>           | 2  | 6   | 0 | 0.0 |
| <i>Cistanche</i>       | 4  | 23  | 0 | 0.0 |
| <i>Malope</i>          | 2  | 6   | 0 | 0.0 |
| <i>Alpinia</i>         | 23 | 83  | 0 | 0.0 |
| <i>Ptychomnion</i>     | 4  | 10  | 0 | 0.0 |
| <i>Boesenbergia</i>    | 5  | 11  | 0 | 0.0 |
| <i>Kaempferia</i>      | 19 | 74  | 0 | 0.0 |
| <i>Anthemis</i>        | 2  | 4   | 0 | 0.0 |
| <i>Tanacetum</i>       | 8  | 16  | 0 | 0.0 |
| <i>Combretum</i>       | 6  | 16  | 0 | 0.0 |
| <i>Curcuma</i>         | 9  | 61  | 0 | 0.0 |
| <i>Croton</i>          | 5  | 13  | 0 | 0.0 |
| <i>Tupistra</i>        | 3  | 14  | 0 | 0.0 |
| <i>Mikania</i>         | 2  | 10  | 0 | 0.0 |
| <i>Gigantochloa</i>    | 2  | 8   | 0 | 0.0 |
| <i>Opuntia</i>         | 4  | 17  | 0 | 0.0 |
| <i>Gagnepainia</i>     | 2  | 6   | 0 | 0.0 |
| <i>Omphalogramma</i>   | 7  | 39  | 0 | 0.0 |
| <i>Jacquemontia</i>    | 3  | 8   | 0 | 0.0 |
| <i>Casearia</i>        | 2  | 4   | 0 | 0.0 |
| <i>Hyphaene</i>        | 2  | 6   | 0 | 0.0 |
| <i>Grimmia</i>         | 7  | 73  | 0 | 0.0 |
| <i>Anthyllis</i>       | 9  | 21  | 0 | 0.0 |
| <i>Psidium</i>         | 2  | 4   | 0 | 0.0 |
| <i>Caralluma</i>       | 4  | 8   | 0 | 0.0 |
| <i>Tolpis</i>          | 5  | 10  | 0 | 0.0 |
| <i>Prosthechea</i>     | 3  | 7   | 0 | 0.0 |
| <i>Ampelocissus</i>    | 2  | 4   | 0 | 0.0 |
| <i>Cischweinfia</i>    | 3  | 6   | 0 | 0.0 |
| <i>Cuitlauzina</i>     | 3  | 6   | 0 | 0.0 |
| <i>Cyrtochilum</i>     | 10 | 25  | 0 | 0.0 |
| <i>Fernandezia</i>     | 2  | 4   | 0 | 0.0 |
| <i>Lockhartia</i>      | 2  | 4   | 0 | 0.0 |
| <i>Ornithocephalus</i> | 3  | 7   | 0 | 0.0 |
| <i>Trichocentrum</i>   | 3  | 6   | 0 | 0.0 |
| <i>Trichopilia</i>     | 3  | 10  | 0 | 0.0 |
| <i>Picconia</i>        | 2  | 9   | 0 | 0.0 |
| <i>Mammillaria</i>     | 2  | 4   | 0 | 0.0 |
| <i>Paspalum</i>        | 5  | 14  | 0 | 0.0 |
| <i>Calliandra</i>      | 2  | 4   | 0 | 0.0 |

|                          |    |     |   |     |
|--------------------------|----|-----|---|-----|
| <i>Cissus</i>            | 8  | 19  | 0 | 0.0 |
| <i>Tetrastigma</i>       | 30 | 86  | 0 | 0.0 |
| <i>Pfeiffera</i>         | 6  | 13  | 0 | 0.0 |
| <i>Rhipsalis</i>         | 11 | 27  | 0 | 0.0 |
| <i>Lepismium</i>         | 3  | 8   | 0 | 0.0 |
| <i>Comparettia</i>       | 4  | 8   | 0 | 0.0 |
| <i>Erycina</i>           | 6  | 15  | 0 | 0.0 |
| <i>Gomesa</i>            | 20 | 43  | 0 | 0.0 |
| <i>Ionopsis</i>          | 3  | 7   | 0 | 0.0 |
| <i>Miltoniopsis</i>      | 2  | 4   | 0 | 0.0 |
| <i>Odontoglossum</i>     | 2  | 4   | 0 | 0.0 |
| <i>Rhynchosteles</i>     | 3  | 9   | 0 | 0.0 |
| <i>Tolumnia</i>          | 4  | 8   | 0 | 0.0 |
| <i>Pyrosia</i>           | 3  | 9   | 0 | 0.0 |
| <i>Eperua</i>            | 2  | 8   | 0 | 0.0 |
| <i>Protium</i>           | 5  | 15  | 0 | 0.0 |
| <i>Caucaea</i>           | 3  | 6   | 0 | 0.0 |
| <i>Galinsoga</i>         | 2  | 5   | 0 | 0.0 |
| <i>Melampodium</i>       | 14 | 234 | 0 | 0.0 |
| <i>Syzygium</i>          | 3  | 9   | 0 | 0.0 |
| <i>Paepalanthus</i>      | 2  | 6   | 0 | 0.0 |
| <i>Amomum</i>            | 21 | 62  | 0 | 0.0 |
| <i>Enceliopsis</i>       | 2  | 4   | 0 | 0.0 |
| <i>Aronia</i>            | 3  | 6   | 0 | 0.0 |
| <i>Hoodia</i>            | 3  | 12  | 0 | 0.0 |
| <i>Rhodiola</i>          | 6  | 26  | 0 | 0.0 |
| <i>Faurea</i>            | 2  | 6   | 0 | 0.0 |
| <i>Thladiantha</i>       | 14 | 86  | 0 | 0.0 |
| <i>Tarasa</i>            | 6  | 13  | 0 | 0.0 |
| <i>Aulosepalum</i>       | 4  | 8   | 0 | 0.0 |
| <i>Micropholis</i>       | 5  | 14  | 0 | 0.0 |
| <i>Rhynchostylis</i>     | 3  | 15  | 0 | 0.0 |
| <i>Miconia</i>           | 2  | 5   | 0 | 0.0 |
| <i>Cota</i>              | 2  | 6   | 0 | 0.0 |
| <i>Palaua</i>            | 3  | 7   | 0 | 0.0 |
| <i>Searsia</i>           | 3  | 9   | 0 | 0.0 |
| <i>Elephantopus</i>      | 2  | 9   | 0 | 0.0 |
| <i>Holcoglossum</i>      | 7  | 33  | 0 | 0.0 |
| <i>Glossoloma</i>        | 2  | 4   | 0 | 0.0 |
| <i>Myrcia</i>            | 5  | 14  | 0 | 0.0 |
| <i>Jarava</i>            | 5  | 15  | 0 | 0.0 |
| <i>Jacobaea</i>          | 2  | 4   | 0 | 0.0 |
| <i>Leochilus</i>         | 2  | 4   | 0 | 0.0 |
| <i>Tripogon</i>          | 2  | 10  | 0 | 0.0 |
| <i>Polyphlebium</i>      | 2  | 7   | 0 | 0.0 |
| <i>Mariosousa</i>        | 2  | 4   | 0 | 0.0 |
| <i>Vachellia</i>         | 2  | 17  | 0 | 0.0 |
| <i>Pugionium</i>         | 2  | 10  | 0 | 0.0 |
| <i>Amelichloa</i>        | 3  | 17  | 0 | 0.0 |
| <i>Sorosaris</i>         | 4  | 16  | 0 | 0.0 |
| <i>Grandiphyllum</i>     | 2  | 4   | 0 | 0.0 |
| <i>Dasiphora</i>         | 2  | 14  | 0 | 0.0 |
| <i>Niphotrichum</i>      | 3  | 14  | 0 | 0.0 |
| <i>Bucklandiella</i>     | 2  | 6   | 0 | 0.0 |
| <i>Codriophorus</i>      | 2  | 12  | 0 | 0.0 |
| <i>Pityopsis</i>         | 5  | 12  | 0 | 0.0 |
| <i>Chaetoseris</i>       | 2  | 4   | 0 | 0.0 |
| <i>Razafimandibsonia</i> | 2  | 6   | 0 | 0.0 |
| <i>Nyholmiella</i>       | 2  | 8   | 0 | 0.0 |
| <i>Pterygiella</i>       | 4  | 47  | 0 | 0.0 |
| <i>Pappostipa</i>        | 4  | 23  | 0 | 0.0 |
| <i>Pilosocereus</i>      | 4  | 48  | 0 | 0.0 |



|                         |   |    |   |     |
|-------------------------|---|----|---|-----|
| <i>Nabalus</i>          | 7 | 16 | 0 | 0.0 |
| <i>Talipariti</i>       | 3 | 25 | 0 | 0.0 |
| <i>Syncalathium</i>     | 7 | 24 | 0 | 0.0 |
| <i>Paraholcoglossum</i> | 2 | 9  | 0 | 0.0 |
| <i>Tsiorchis</i>        | 2 | 9  | 0 | 0.0 |
