# Supplementary material for: Utility of the trnH–psbA Intergenic Spacer Region and Its Combinations as Plant DNA Barcodes: A Meta-Analysis
Source: PubMed Central journal article supplement (PMC3498263; doi:10.1371/journal.pone.0048833), 2012-11-14
Supplement: pone.0048833.s007.pdf [file pone.0048833.s007.pdf]

**Table S7.** Percentages of sequences with *rps19* insertions in different families.

| <b>Family</b>    | <b>No. of sequences</b> | <b>No. of sequences with <i>rps19</i></b> | <b>Percentage of sequences with <i>rps19</i> insertions (%)</b> |
|------------------|-------------------------|-------------------------------------------|-----------------------------------------------------------------|
| Poaceae          | 494                     | 494                                       | 100.0                                                           |
| Orchidaceae      | 488                     | 488                                       | 100.0                                                           |
| Asparagaceae     | 142                     | 142                                       | 100.0                                                           |
| Hypoxidaceae     | 123                     | 123                                       | 100.0                                                           |
| Bromeliaceae     | 94                      | 94                                        | 100.0                                                           |
| Arecaceae        | 66                      | 66                                        | 100.0                                                           |
| Hyacinthaceae    | 59                      | 59                                        | 100.0                                                           |
| Amaryllidaceae   | 36                      | 36                                        | 100.0                                                           |
| Xanthorrhoeaceae | 29                      | 29                                        | 100.0                                                           |
| Commelinaceae    | 7                       | 7                                         | 100.0                                                           |
| Typhaceae        | 6                       | 6                                         | 100.0                                                           |
| Eriocaulaceae    | 6                       | 6                                         | 100.0                                                           |
| Juncaceae        | 5                       | 5                                         | 100.0                                                           |
| Stemonaceae      | 5                       | 5                                         | 100.0                                                           |
| Zingiberaceae    | 297                     | 294                                       | 99.0                                                            |
| Iridaceae        | 128                     | 120                                       | 93.8                                                            |
| Zygophyllaceae   | 122                     | 109                                       | 89.3                                                            |
| Cyperaceae       | 66                      | 53                                        | 80.3                                                            |
| Musaceae         | 72                      | 54                                        | 75.0                                                            |
| Acoraceae        | 44                      | 33                                        | 75.0                                                            |
| Smilacaceae      | 10                      | 7                                         | 70.0                                                            |
| Melanthiaceae    | 132                     | 87                                        | 65.9                                                            |
| Pandanaceae      | 5                       | 3                                         | 60.0                                                            |
| Fagaceae         | 173                     | 90                                        | 52.0                                                            |
| Liliaceae        | 258                     | 76                                        | 29.5                                                            |
| Dioscoreaceae    | 197                     | 56                                        | 28.4                                                            |
| Aquifoliaceae    | 44                      | 10                                        | 22.7                                                            |
| Colchicaceae     | 61                      | 12                                        | 19.7                                                            |
| Melastomataceae  | 15                      | 1                                         | 6.7                                                             |
| Polygonaceae     | 148                     | 7                                         | 4.7                                                             |
| Acanthaceae      | 24                      | 1                                         | 4.2                                                             |
| Apiaceae         | 103                     | 4                                         | 3.9                                                             |
| Grossulariaceae  | 32                      | 1                                         | 3.1                                                             |
| Amaranthaceae    | 77                      | 1                                         | 1.3                                                             |
| Araceae          | 97                      | 1                                         | 1.0                                                             |
| Rosaceae         | 580                     | 5                                         | 0.9                                                             |
| Rubiaceae        | 199                     | 1                                         | 0.5                                                             |
| Lamiaceae        | 429                     | 2                                         | 0.5                                                             |
| Asteraceae       | 1654                    | 7                                         | 0.4                                                             |
| Fabaceae         | 515                     | 1                                         | 0.2                                                             |
| Solanaceae       | 746                     | 1                                         | 0.1                                                             |
| Polytrichaceae   | 12                      | 0                                         | 0.0                                                             |
| Dicranaceae      | 64                      | 0                                         | 0.0                                                             |
| Mniaceae         | 9                       | 0                                         | 0.0                                                             |
| Polypodiaceae    | 9                       | 0                                         | 0.0                                                             |
| Pinaceae         | 359                     | 0                                         | 0.0                                                             |
| Podocarpaceae    | 13                      | 0                                         | 0.0                                                             |
| Cupressaceae     | 73                      | 0                                         | 0.0                                                             |
| Ephedraceae      | 15                      | 0                                         | 0.0                                                             |
| Ranunculaceae    | 363                     | 0                                         | 0.0                                                             |
| Papaveraceae     | 5                       | 0                                         | 0.0                                                             |
| Moraceae         | 502                     | 0                                         | 0.0                                                             |

|                  |     |   |     |
|------------------|-----|---|-----|
| Betulaceae       | 205 | 0 | 0.0 |
| Caryophyllaceae  | 247 | 0 | 0.0 |
| Cactaceae        | 117 | 0 | 0.0 |
| Vitaceae         | 423 | 0 | 0.0 |
| Rhamnaceae       | 7   | 0 | 0.0 |
| Malvaceae        | 232 | 0 | 0.0 |
| Cucurbitaceae    | 475 | 0 | 0.0 |
| Begoniaceae      | 144 | 0 | 0.0 |
| Passifloraceae   | 41  | 0 | 0.0 |
| Salicaceae       | 59  | 0 | 0.0 |
| Brassicaceae     | 84  | 0 | 0.0 |
| Sapotaceae       | 45  | 0 | 0.0 |
| Crassulaceae     | 32  | 0 | 0.0 |
| Saxifragaceae    | 102 | 0 | 0.0 |
| Myrtaceae        | 34  | 0 | 0.0 |
| Onagraceae       | 11  | 0 | 0.0 |
| Combretaceae     | 16  | 0 | 0.0 |
| Santalaceae      | 8   | 0 | 0.0 |
| Loranthaceae     | 37  | 0 | 0.0 |
| Euphorbiaceae    | 13  | 0 | 0.0 |
| Linaceae         | 15  | 0 | 0.0 |
| Anacardiaceae    | 9   | 0 | 0.0 |
| Burseraceae      | 375 | 0 | 0.0 |
| Geraniaceae      | 10  | 0 | 0.0 |
| Oxalidaceae      | 31  | 0 | 0.0 |
| Araliaceae       | 124 | 0 | 0.0 |
| Apocynaceae      | 51  | 0 | 0.0 |
| Convolvulaceae   | 69  | 0 | 0.0 |
| Oleaceae         | 308 | 0 | 0.0 |
| Caprifoliaceae   | 73  | 0 | 0.0 |
| Adoxaceae        | 99  | 0 | 0.0 |
| Celastraceae     | 232 | 0 | 0.0 |
| Proteaceae       | 6   | 0 | 0.0 |
| Primulaceae      | 361 | 0 | 0.0 |
| Ericaceae        | 785 | 0 | 0.0 |
| Campanulaceae    | 40  | 0 | 0.0 |
| Platanaceae      | 16  | 0 | 0.0 |
| Plumbaginaceae   | 57  | 0 | 0.0 |
| Alismataceae     | 51  | 0 | 0.0 |
| Heliconiaceae    | 4   | 0 | 0.0 |
| Sphagnaceae      | 4   | 0 | 0.0 |
| Pteridaceae      | 70  | 0 | 0.0 |
| Potamogetonaceae | 25  | 0 | 0.0 |
| Juglandaceae     | 11  | 0 | 0.0 |
| Ebenaceae        | 7   | 0 | 0.0 |
| Styracaceae      | 5   | 0 | 0.0 |
| Symplocaceae     | 204 | 0 | 0.0 |
| Gentianaceae     | 56  | 0 | 0.0 |
| Boraginaceae     | 48  | 0 | 0.0 |
| Verbenaceae      | 4   | 0 | 0.0 |
| Chrysobalanaceae | 14  | 0 | 0.0 |
| Hydrangeaceae    | 36  | 0 | 0.0 |
| Rutaceae         | 47  | 0 | 0.0 |
| Violaceae        | 14  | 0 | 0.0 |
| Paeoniaceae      | 36  | 0 | 0.0 |
| Taxaceae         | 68  | 0 | 0.0 |

|                  |     |   |     |
|------------------|-----|---|-----|
| Araucariaceae    | 46  | 0 | 0.0 |
| Balsaminaceae    | 4   | 0 | 0.0 |
| Cymodoceaceae    | 13  | 0 | 0.0 |
| Elaeagnaceae     | 10  | 0 | 0.0 |
| Elaeocarpaceae   | 4   | 0 | 0.0 |
| Gesneriaceae     | 45  | 0 | 0.0 |
| Hydrocharitaceae | 26  | 0 | 0.0 |
| Loganiaceae      | 13  | 0 | 0.0 |
| Nothofagaceae    | 47  | 0 | 0.0 |
| Theaceae         | 65  | 0 | 0.0 |
| Zosteraceae      | 8   | 0 | 0.0 |
| Dryopteridaceae  | 64  | 0 | 0.0 |
| Hymenophyllaceae | 34  | 0 | 0.0 |
| Lindsaeaceae     | 56  | 0 | 0.0 |
| Lomariopsidaceae | 4   | 0 | 0.0 |
| Brachytheciaceae | 12  | 0 | 0.0 |
| Loasaceae        | 88  | 0 | 0.0 |
| Thymelaeaceae    | 56  | 0 | 0.0 |
| Berberidaceae    | 83  | 0 | 0.0 |
| Aspleniaceae     | 18  | 0 | 0.0 |
| Hamamelidaceae   | 61  | 0 | 0.0 |
| Cornaceae        | 46  | 0 | 0.0 |
| Meliaceae        | 32  | 0 | 0.0 |
| Cephalotaxaceae  | 59  | 0 | 0.0 |
| Orthotrichaceae  | 41  | 0 | 0.0 |
| Hypnaceae        | 9   | 0 | 0.0 |
| Tamaricaceae     | 56  | 0 | 0.0 |
| Grimmiaceae      | 116 | 0 | 0.0 |
| Caryocaraceae    | 104 | 0 | 0.0 |
| Meliantaceae     | 10  | 0 | 0.0 |
| Stachyuraceae    | 10  | 0 | 0.0 |
| Altingiaceae     | 33  | 0 | 0.0 |
| Nitrariaceae     | 23  | 0 | 0.0 |
| Orobanchaceae    | 508 | 0 | 0.0 |
| Ptychomniaceae   | 10  | 0 | 0.0 |
| Plantaginaceae   | 720 | 0 | 0.0 |
| Phyllanthaceae   | 53  | 0 | 0.0 |
| Woodsiaceae      | 20  | 0 | 0.0 |
| Hypericaceae     | 5   | 0 | 0.0 |
| Lygodiaceae      | 17  | 0 | 0.0 |
| Aceraceae        | 445 | 0 | 0.0 |
