# Supplementary material for: Utility of the trnH–psbA Intergenic Spacer Region and Its Combinations as Plant DNA Barcodes: A Meta-Analysis
Source: PubMed Central journal article supplement (PMC3498263; doi:10.1371/journal.pone.0048833), 2012-11-14
Supplement: pone.0048833.s008.pdf [file pone.0048833.s008.pdf]

**Table S8.** Percentages of sequences with *rps19* insertions in different genera.

| <b>Genus</b>           | <b>No. of sequences</b> | <b>No. of sequences with <i>rps19</i> insertion</b> | <b>Percentage of sequences with <i>rps19</i> insertions (%)</b> |
|------------------------|-------------------------|-----------------------------------------------------|-----------------------------------------------------------------|
| <i>Oryza</i>           | 8                       | 8                                                   | 100.0                                                           |
| <i>Panicum</i>         | 4                       | 4                                                   | 100.0                                                           |
| <i>Poa</i>             | 11                      | 11                                                  | 100.0                                                           |
| <i>Setaria</i>         | 4                       | 4                                                   | 100.0                                                           |
| <i>Bambusa</i>         | 15                      | 15                                                  | 100.0                                                           |
| <i>Cenchrus</i>        | 6                       | 6                                                   | 100.0                                                           |
| <i>Thinopyrum</i>      | 37                      | 37                                                  | 100.0                                                           |
| <i>Festuca</i>         | 20                      | 20                                                  | 100.0                                                           |
| <i>Allium</i>          | 12                      | 12                                                  | 100.0                                                           |
| <i>Asparagus</i>       | 29                      | 29                                                  | 100.0                                                           |
| <i>Lilium</i>          | 28                      | 28                                                  | 100.0                                                           |
| <i>Caryota</i>         | 21                      | 21                                                  | 100.0                                                           |
| <i>Typha</i>           | 6                       | 6                                                   | 100.0                                                           |
| <i>Commelina</i>       | 7                       | 7                                                   | 100.0                                                           |
| <i>Sabal</i>           | 4                       | 4                                                   | 100.0                                                           |
| <i>Carex</i>           | 53                      | 53                                                  | 100.0                                                           |
| <i>Juncus</i>          | 5                       | 5                                                   | 100.0                                                           |
| <i>Cymbidium</i>       | 4                       | 4                                                   | 100.0                                                           |
| <i>Aechmea</i>         | 36                      | 36                                                  | 100.0                                                           |
| <i>Billbergia</i>      | 8                       | 8                                                   | 100.0                                                           |
| <i>Tillandsia</i>      | 6                       | 6                                                   | 100.0                                                           |
| <i>Agrostis</i>        | 5                       | 5                                                   | 100.0                                                           |
| <i>Calamagrostis</i>   | 11                      | 11                                                  | 100.0                                                           |
| <i>Dendrocalamus</i>   | 5                       | 5                                                   | 100.0                                                           |
| <i>Elymus</i>          | 10                      | 10                                                  | 100.0                                                           |
| <i>Stipa</i>           | 8                       | 8                                                   | 100.0                                                           |
| <i>Zizania</i>         | 25                      | 25                                                  | 100.0                                                           |
| <i>Maianthemum</i>     | 68                      | 68                                                  | 100.0                                                           |
| <i>Polygonatum</i>     | 31                      | 31                                                  | 100.0                                                           |
| <i>Haworthia</i>       | 29                      | 29                                                  | 100.0                                                           |
| <i>Phalaenopsis</i>    | 26                      | 26                                                  | 100.0                                                           |
| <i>Urochloa</i>        | 5                       | 5                                                   | 100.0                                                           |
| <i>Dendrobium</i>      | 47                      | 47                                                  | 100.0                                                           |
| <i>Glyceria</i>        | 86                      | 86                                                  | 100.0                                                           |
| <i>Nassella</i>        | 13                      | 13                                                  | 100.0                                                           |
| <i>Pseudoroegneria</i> | 4                       | 4                                                   | 100.0                                                           |
| <i>Cypripedium</i>     | 13                      | 13                                                  | 100.0                                                           |
| <i>Bulbophyllum</i>    | 30                      | 30                                                  | 100.0                                                           |
| <i>Encyclia</i>        | 6                       | 6                                                   | 100.0                                                           |
| <i>Cattleya</i>        | 8                       | 8                                                   | 100.0                                                           |
| <i>Eragrostis</i>      | 13                      | 13                                                  | 100.0                                                           |
| <i>Sporobolus</i>      | 4                       | 4                                                   | 100.0                                                           |
| <i>Oncidium</i>        | 93                      | 93                                                  | 100.0                                                           |
| <i>Hohenbergia</i>     | 4                       | 4                                                   | 100.0                                                           |
| <i>Nidularium</i>      | 11                      | 11                                                  | 100.0                                                           |
| <i>Pitcairnia</i>      | 4                       | 4                                                   | 100.0                                                           |
| <i>Vriesea</i>         | 25                      | 25                                                  | 100.0                                                           |
| <i>Erythronium</i>     | 48                      | 48                                                  | 100.0                                                           |
| <i>Paris</i>           | 81                      | 81                                                  | 100.0                                                           |
| <i>Trillium</i>        | 6                       | 6                                                   | 100.0                                                           |
| <i>Kengyilia</i>       | 101                     | 101                                                 | 100.0                                                           |
| <i>Piptatherum</i>     | 5                       | 5                                                   | 100.0                                                           |

|                         |     |     |       |
|-------------------------|-----|-----|-------|
| <i>Digitaria</i>        | 7   | 7   | 100.0 |
| <i>Larrea</i>           | 109 | 109 | 100.0 |
| <i>Pauridia</i>         | 123 | 123 | 100.0 |
| <i>Hyacinthoides</i>    | 59  | 59  | 100.0 |
| <i>Lycoris</i>          | 24  | 24  | 100.0 |
| <i>Stemona</i>          | 5   | 5   | 100.0 |
| <i>Boesenbergia</i>     | 11  | 11  | 100.0 |
| <i>Tupistra</i>         | 14  | 14  | 100.0 |
| <i>Gigantochloa</i>     | 8   | 8   | 100.0 |
| <i>Gagnepainia</i>      | 6   | 6   | 100.0 |
| <i>Arenga</i>           | 30  | 30  | 100.0 |
| <i>Hyphaene</i>         | 6   | 6   | 100.0 |
| <i>Wallichia</i>        | 5   | 5   | 100.0 |
| <i>Prosthechea</i>      | 7   | 7   | 100.0 |
| <i>Cischweinfia</i>     | 6   | 6   | 100.0 |
| <i>Cuitlauzina</i>      | 6   | 6   | 100.0 |
| <i>Cyrtochilum</i>      | 25  | 25  | 100.0 |
| <i>Fernandezia</i>      | 4   | 4   | 100.0 |
| <i>Lockhartia</i>       | 4   | 4   | 100.0 |
| <i>Ornithocephalus</i>  | 7   | 7   | 100.0 |
| <i>Trichocentrum</i>    | 6   | 6   | 100.0 |
| <i>Trichopilia</i>      | 10  | 10  | 100.0 |
| <i>Paspalum</i>         | 14  | 14  | 100.0 |
| <i>Comparettia</i>      | 8   | 8   | 100.0 |
| <i>Erycina</i>          | 15  | 15  | 100.0 |
| <i>Gomesa</i>           | 43  | 43  | 100.0 |
| <i>Ionopsis</i>         | 7   | 7   | 100.0 |
| <i>Miltoniopsis</i>     | 4   | 4   | 100.0 |
| <i>Odontoglossum</i>    | 4   | 4   | 100.0 |
| <i>Rhynchostele</i>     | 9   | 9   | 100.0 |
| <i>Tolumnia</i>         | 8   | 8   | 100.0 |
| <i>Caucaea</i>          | 6   | 6   | 100.0 |
| <i>Paepalanthus</i>     | 6   | 6   | 100.0 |
| <i>Amomum</i>           | 62  | 62  | 100.0 |
| <i>Aulosepalum</i>      | 8   | 8   | 100.0 |
| <i>Rhynhostylis</i>     | 15  | 15  | 100.0 |
| <i>Holcoglossum</i>     | 33  | 33  | 100.0 |
| <i>Jarava</i>           | 15  | 15  | 100.0 |
| <i>Leochilus</i>        | 4   | 4   | 100.0 |
| <i>Tripogon</i>         | 10  | 10  | 100.0 |
| <i>Amelichloa</i>       | 17  | 17  | 100.0 |
| <i>Grandiphyllum</i>    | 4   | 4   | 100.0 |
| <i>Pappostipa</i>       | 23  | 23  | 100.0 |
| <i>Paraholcoglossum</i> | 9   | 9   | 100.0 |
| <i>Tsiorchis</i>        | 9   | 9   | 100.0 |
| <i>Alpinia</i>          | 83  | 82  | 98.8  |
| <i>Kaempferia</i>       | 74  | 73  | 98.6  |
| <i>Curcuma</i>          | 61  | 60  | 98.4  |
| <i>Iris</i>             | 128 | 120 | 93.8  |
| <i>Quercus</i>          | 102 | 90  | 88.2  |
| <i>Tacca</i>            | 58  | 49  | 84.5  |
| <i>Acorus</i>           | 44  | 33  | 75.0  |
| <i>Musa</i>             | 72  | 54  | 75.0  |
| <i>Smilax</i>           | 10  | 7   | 70.0  |
| <i>Pandanus</i>         | 5   | 3   | 60.0  |
| <i>Androcymbium</i>     | 15  | 8   | 53.3  |

|                       |     |    |      |
|-----------------------|-----|----|------|
| <i>Rumex</i>          | 14  | 6  | 42.9 |
| <i>Pleurospermum</i>  | 14  | 4  | 28.6 |
| <i>Jacobaea</i>       | 4   | 1  | 25.0 |
| <i>Ilex</i>           | 44  | 10 | 22.7 |
| <i>Galium</i>         | 5   | 1  | 20.0 |
| <i>Arctium</i>        | 6   | 1  | 16.7 |
| <i>Glechoma</i>       | 6   | 1  | 16.7 |
| <i>Trifolium</i>      | 8   | 1  | 12.5 |
| <i>Eupatorium</i>     | 9   | 1  | 11.1 |
| <i>Sorbaria</i>       | 9   | 1  | 11.1 |
| <i>Melastoma</i>      | 10  | 1  | 10.0 |
| <i>Cirsium</i>        | 11  | 1  | 9.1  |
| <i>Colchicum</i>      | 46  | 4  | 8.7  |
| <i>Sonchus</i>        | 15  | 1  | 6.7  |
| <i>Senecio</i>        | 18  | 1  | 5.6  |
| <i>Polygonum</i>      | 19  | 1  | 5.3  |
| <i>Dioscorea</i>      | 139 | 7  | 5.0  |
| <i>Ruellia</i>        | 24  | 1  | 4.2  |
| <i>Lemna</i>          | 29  | 1  | 3.4  |
| <i>Chenopodium</i>    | 31  | 1  | 3.2  |
| <i>Ribes</i>          | 32  | 1  | 3.1  |
| <i>Rosa</i>           | 41  | 1  | 2.4  |
| <i>Prunus</i>         | 89  | 2  | 2.2  |
| <i>Achillea</i>       | 62  | 1  | 1.6  |
| <i>Solanum</i>        | 85  | 1  | 1.2  |
| <i>Mentha</i>         | 85  | 1  | 1.2  |
| <i>Potentilla</i>     | 89  | 1  | 1.1  |
| <i>Citrus</i>         | 36  | 0  | 0.0  |
| <i>Polytrichum</i>    | 12  | 0  | 0.0  |
| <i>Dicranum</i>       | 64  | 0  | 0.0  |
| <i>Plagiomnium</i>    | 9   | 0  | 0.0  |
| <i>Dryopteris</i>     | 64  | 0  | 0.0  |
| <i>Abies</i>          | 134 | 0  | 0.0  |
| <i>Picea</i>          | 123 | 0  | 0.0  |
| <i>Pinus</i>          | 102 | 0  | 0.0  |
| <i>Podocarpus</i>     | 13  | 0  | 0.0  |
| <i>Ephedra</i>        | 15  | 0  | 0.0  |
| <i>Coptis</i>         | 39  | 0  | 0.0  |
| <i>Ranunculus</i>     | 15  | 0  | 0.0  |
| <i>Papaver</i>        | 5   | 0  | 0.0  |
| <i>Ficus</i>          | 290 | 0  | 0.0  |
| <i>Betula</i>         | 13  | 0  | 0.0  |
| <i>Alnus</i>          | 110 | 0  | 0.0  |
| <i>Amaranthus</i>     | 37  | 0  | 0.0  |
| <i>Dianthus</i>       | 46  | 0  | 0.0  |
| <i>Silene</i>         | 197 | 0  | 0.0  |
| <i>Cerastium</i>      | 4   | 0  | 0.0  |
| <i>Vitis</i>          | 243 | 0  | 0.0  |
| <i>Parthenocissus</i> | 15  | 0  | 0.0  |
| <i>Rhamnus</i>        | 7   | 0  | 0.0  |
| <i>Rheum</i>          | 10  | 0  | 0.0  |
| <i>Gossypium</i>      | 37  | 0  | 0.0  |
| <i>Bryonia</i>        | 145 | 0  | 0.0  |
| <i>Momordica</i>      | 94  | 0  | 0.0  |
| <i>Trichosanthes</i>  | 38  | 0  | 0.0  |
| <i>Begonia</i>        | 144 | 0  | 0.0  |

|                     |     |   |     |
|---------------------|-----|---|-----|
| <i>Passiflora</i>   | 41  | 0 | 0.0 |
| <i>Populus</i>      | 13  | 0 | 0.0 |
| <i>Brassica</i>     | 5   | 0 | 0.0 |
| <i>Capsella</i>     | 13  | 0 | 0.0 |
| <i>Raphanus</i>     | 9   | 0 | 0.0 |
| <i>Manilkara</i>    | 8   | 0 | 0.0 |
| <i>Fragaria</i>     | 10  | 0 | 0.0 |
| <i>Malus</i>        | 7   | 0 | 0.0 |
| <i>Parnassia</i>    | 203 | 0 | 0.0 |
| <i>Acacia</i>       | 67  | 0 | 0.0 |
| <i>Albizia</i>      | 8   | 0 | 0.0 |
| <i>Canavalia</i>    | 15  | 0 | 0.0 |
| <i>Leucaena</i>     | 19  | 0 | 0.0 |
| <i>Wisteria</i>     | 16  | 0 | 0.0 |
| <i>Eucalyptus</i>   | 7   | 0 | 0.0 |
| <i>Linum</i>        | 15  | 0 | 0.0 |
| <i>Bursera</i>      | 354 | 0 | 0.0 |
| <i>Acer</i>         | 445 | 0 | 0.0 |
| <i>Geranium</i>     | 10  | 0 | 0.0 |
| <i>Oxalis</i>       | 31  | 0 | 0.0 |
| <i>Hydrocotyle</i>  | 29  | 0 | 0.0 |
| <i>Hedera</i>       | 15  | 0 | 0.0 |
| <i>Panax</i>        | 33  | 0 | 0.0 |
| <i>Capsicum</i>     | 42  | 0 | 0.0 |
| <i>Datura</i>       | 20  | 0 | 0.0 |
| <i>Hyoscyamus</i>   | 4   | 0 | 0.0 |
| <i>Petunia</i>      | 507 | 0 | 0.0 |
| <i>Convolvulus</i>  | 61  | 0 | 0.0 |
| <i>Leonurus</i>     | 6   | 0 | 0.0 |
| <i>Scutellaria</i>  | 28  | 0 | 0.0 |
| <i>Antirrhinum</i>  | 65  | 0 | 0.0 |
| <i>Veronica</i>     | 70  | 0 | 0.0 |
| <i>Sambucus</i>     | 29  | 0 | 0.0 |
| <i>Viburnum</i>     | 70  | 0 | 0.0 |
| <i>Ambrosia</i>     | 8   | 0 | 0.0 |
| <i>Artemisia</i>    | 8   | 0 | 0.0 |
| <i>Helianthus</i>   | 5   | 0 | 0.0 |
| <i>Lactuca</i>      | 9   | 0 | 0.0 |
| <i>Ligularia</i>    | 41  | 0 | 0.0 |
| <i>Arnica</i>       | 18  | 0 | 0.0 |
| <i>Cornus</i>       | 16  | 0 | 0.0 |
| <i>Nyssa</i>        | 30  | 0 | 0.0 |
| <i>Euonymus</i>     | 29  | 0 | 0.0 |
| <i>Rhododendron</i> | 351 | 0 | 0.0 |
| <i>Lobelia</i>      | 10  | 0 | 0.0 |
| <i>Hamamelis</i>    | 15  | 0 | 0.0 |
| <i>Liquidambar</i>  | 33  | 0 | 0.0 |
| <i>Platanus</i>     | 16  | 0 | 0.0 |
| <i>Alocasia</i>     | 7   | 0 | 0.0 |
| <i>Colocasia</i>    | 4   | 0 | 0.0 |
| <i>Spirodela</i>    | 10  | 0 | 0.0 |
| <i>Cyperus</i>      | 13  | 0 | 0.0 |
| <i>Heliconia</i>    | 4   | 0 | 0.0 |
| <i>Carpinus</i>     | 31  | 0 | 0.0 |
| <i>Echinodorus</i>  | 39  | 0 | 0.0 |
| <i>Epilobium</i>    | 4   | 0 | 0.0 |

|                      |     |   |     |
|----------------------|-----|---|-----|
| <i>Halodule</i>      | 13  | 0 | 0.0 |
| <i>Juniperus</i>     | 54  | 0 | 0.0 |
| <i>Najas</i>         | 26  | 0 | 0.0 |
| <i>Potamogeton</i>   | 25  | 0 | 0.0 |
| <i>Ardisia</i>       | 5   | 0 | 0.0 |
| <i>Cassiope</i>      | 14  | 0 | 0.0 |
| <i>Chrysanthemum</i> | 46  | 0 | 0.0 |
| <i>Chrysophyllum</i> | 7   | 0 | 0.0 |
| <i>Corylus</i>       | 9   | 0 | 0.0 |
| <i>Cupressus</i>     | 19  | 0 | 0.0 |
| <i>Diospyros</i>     | 7   | 0 | 0.0 |
| <i>Enkianthus</i>    | 8   | 0 | 0.0 |
| <i>Erica</i>         | 213 | 0 | 0.0 |
| <i>Gaultheria</i>    | 184 | 0 | 0.0 |
| <i>Gazania</i>       | 20  | 0 | 0.0 |
| <i>Ligustrum</i>     | 86  | 0 | 0.0 |
| <i>Ostrya</i>        | 14  | 0 | 0.0 |
| <i>Paeonia</i>       | 36  | 0 | 0.0 |
| <i>Styrax</i>        | 5   | 0 | 0.0 |
| <i>Tragopogon</i>    | 22  | 0 | 0.0 |
| <i>Viola</i>         | 14  | 0 | 0.0 |
| <i>Sphagnum</i>      | 4   | 0 | 0.0 |
| <i>Adiantum</i>      | 6   | 0 | 0.0 |
| <i>Pteris</i>        | 9   | 0 | 0.0 |
| <i>Lygodium</i>      | 17  | 0 | 0.0 |
| <i>Alisma</i>        | 12  | 0 | 0.0 |
| <i>Cyananthus</i>    | 30  | 0 | 0.0 |
| <i>Juglans</i>       | 11  | 0 | 0.0 |
| <i>Lepidium</i>      | 26  | 0 | 0.0 |
| <i>Valeriana</i>     | 13  | 0 | 0.0 |
| <i>Schotia</i>       | 49  | 0 | 0.0 |
| <i>Astragalus</i>    | 19  | 0 | 0.0 |
| <i>Fagus</i>         | 17  | 0 | 0.0 |
| <i>Asclepias</i>     | 6   | 0 | 0.0 |
| <i>Gentiana</i>      | 14  | 0 | 0.0 |
| <i>Salvia</i>        | 49  | 0 | 0.0 |
| <i>Teucrium</i>      | 8   | 0 | 0.0 |
| <i>Verbena</i>       | 4   | 0 | 0.0 |
| <i>Berberis</i>      | 83  | 0 | 0.0 |
| <i>Anemone</i>       | 40  | 0 | 0.0 |
| <i>Licania</i>       | 10  | 0 | 0.0 |
| <i>Aeonium</i>       | 6   | 0 | 0.0 |
| <i>Hydrangea</i>     | 32  | 0 | 0.0 |
| <i>Amelanchier</i>   | 8   | 0 | 0.0 |
| <i>Crataegus</i>     | 192 | 0 | 0.0 |
| <i>Photinia</i>      | 11  | 0 | 0.0 |
| <i>Rubus</i>         | 39  | 0 | 0.0 |
| <i>Lycium</i>        | 32  | 0 | 0.0 |
| <i>Mandragora</i>    | 7   | 0 | 0.0 |
| <i>Psychotria</i>    | 18  | 0 | 0.0 |
| <i>Amentotaxus</i>   | 19  | 0 | 0.0 |
| <i>Taxus</i>         | 39  | 0 | 0.0 |
| <i>Araucaria</i>     | 46  | 0 | 0.0 |
| <i>Elaeocarpus</i>   | 4   | 0 | 0.0 |
| <i>Strychnos</i>     | 13  | 0 | 0.0 |
| <i>Nolana</i>        | 38  | 0 | 0.0 |

|                      |     |   |     |
|----------------------|-----|---|-----|
| <i>Nothofagus</i>    | 47  | 0 | 0.0 |
| <i>Plantago</i>      | 36  | 0 | 0.0 |
| <i>Zostera</i>       | 8   | 0 | 0.0 |
| <i>Crepidomanes</i>  | 12  | 0 | 0.0 |
| <i>Asplenium</i>     | 18  | 0 | 0.0 |
| <i>Lindsaea</i>      | 52  | 0 | 0.0 |
| <i>Odontosoria</i>   | 4   | 0 | 0.0 |
| <i>Nephrolepis</i>   | 4   | 0 | 0.0 |
| <i>Impatiens</i>     | 4   | 0 | 0.0 |
| <i>Santalum</i>      | 8   | 0 | 0.0 |
| <i>Chaenomeles</i>   | 10  | 0 | 0.0 |
| <i>Cheilanthes</i>   | 55  | 0 | 0.0 |
| <i>Eranthis</i>      | 41  | 0 | 0.0 |
| <i>Mentzelia</i>     | 88  | 0 | 0.0 |
| <i>Hymenophyllum</i> | 15  | 0 | 0.0 |
| <i>Ajuga</i>         | 6   | 0 | 0.0 |
| <i>Fraxinus</i>      | 213 | 0 | 0.0 |
| <i>Ocimum</i>        | 17  | 0 | 0.0 |
| <i>Origanum</i>      | 22  | 0 | 0.0 |
| <i>Rosmarinus</i>    | 8   | 0 | 0.0 |
| <i>Leea</i>          | 5   | 0 | 0.0 |
| <i>Swertia</i>       | 33  | 0 | 0.0 |
| <i>Salix</i>         | 42  | 0 | 0.0 |
| <i>Mitella</i>       | 102 | 0 | 0.0 |
| <i>Heracleum</i>     | 17  | 0 | 0.0 |
| <i>Angelica</i>      | 9   | 0 | 0.0 |
| <i>Arctotis</i>      | 38  | 0 | 0.0 |
| <i>Carlina</i>       | 8   | 0 | 0.0 |
| <i>Centaurea</i>     | 65  | 0 | 0.0 |
| <i>Doniophyton</i>   | 4   | 0 | 0.0 |
| <i>Erigeron</i>      | 15  | 0 | 0.0 |
| <i>Haplocarpha</i>   | 8   | 0 | 0.0 |
| <i>Inula</i>         | 11  | 0 | 0.0 |
| <i>Lychnophora</i>   | 214 | 0 | 0.0 |
| <i>Saussurea</i>     | 4   | 0 | 0.0 |
| <i>Santolina</i>     | 39  | 0 | 0.0 |
| <i>Eryngium</i>      | 13  | 0 | 0.0 |
| <i>Pedicularis</i>   | 301 | 0 | 0.0 |
| <i>Luculia</i>       | 10  | 0 | 0.0 |
| <i>Morinda</i>       | 18  | 0 | 0.0 |
| <i>Mussaenda</i>     | 30  | 0 | 0.0 |
| <i>Oldenlandia</i>   | 39  | 0 | 0.0 |
| <i>Canarium</i>      | 6   | 0 | 0.0 |
| <i>Nitraria</i>      | 8   | 0 | 0.0 |
| <i>Peganum</i>       | 15  | 0 | 0.0 |
| <i>Trichilia</i>     | 7   | 0 | 0.0 |
| <i>Cipadessa</i>     | 7   | 0 | 0.0 |
| <i>Agalinis</i>      | 90  | 0 | 0.0 |
| <i>Castilleja</i>    | 47  | 0 | 0.0 |
| <i>Limonium</i>      | 57  | 0 | 0.0 |
| <i>Suaeda</i>        | 9   | 0 | 0.0 |
| <i>Delphinium</i>    | 46  | 0 | 0.0 |
| <i>Glycyrrhiza</i>   | 7   | 0 | 0.0 |
| <i>Dendropanax</i>   | 36  | 0 | 0.0 |
| <i>Schefflera</i>    | 11  | 0 | 0.0 |
| <i>Schizolobium</i>  | 12  | 0 | 0.0 |

|                      |     |   |     |
|----------------------|-----|---|-----|
| <i>Pulsatilla</i>    | 12  | 0 | 0.0 |
| <i>Andira</i>        | 6   | 0 | 0.0 |
| <i>Hippophae</i>     | 10  | 0 | 0.0 |
| <i>Cyrtandra</i>     | 41  | 0 | 0.0 |
| <i>Aconitum</i>      | 170 | 0 | 0.0 |
| <i>Osmorhiza</i>     | 31  | 0 | 0.0 |
| <i>Peucedanum</i>    | 19  | 0 | 0.0 |
| <i>Lonicera</i>      | 60  | 0 | 0.0 |
| <i>Primula</i>       | 205 | 0 | 0.0 |
| <i>Taraxacum</i>     | 7   | 0 | 0.0 |
| <i>Hypnum</i>        | 9   | 0 | 0.0 |
| <i>Thymus</i>        | 25  | 0 | 0.0 |
| <i>Cephalotaxus</i>  | 59  | 0 | 0.0 |
| <i>Torreya</i>       | 10  | 0 | 0.0 |
| <i>Arisaema</i>      | 9   | 0 | 0.0 |
| <i>Veratrum</i>      | 45  | 0 | 0.0 |
| <i>Cardamine</i>     | 15  | 0 | 0.0 |
| <i>Gentianopsis</i>  | 9   | 0 | 0.0 |
| <i>Corylopsis</i>    | 10  | 0 | 0.0 |
| <i>Pieris</i>        | 15  | 0 | 0.0 |
| <i>Alstonia</i>      | 6   | 0 | 0.0 |
| <i>Orthotrichum</i>  | 33  | 0 | 0.0 |
| <i>Brachythecium</i> | 12  | 0 | 0.0 |
| <i>Lamium</i>        | 46  | 0 | 0.0 |
| <i>Caesalpinia</i>   | 75  | 0 | 0.0 |
| <i>Chamaecrista</i>  | 4   | 0 | 0.0 |
| <i>Dalbergia</i>     | 31  | 0 | 0.0 |
| <i>Lespedeza</i>     | 8   | 0 | 0.0 |
| <i>Senna</i>         | 29  | 0 | 0.0 |
| <i>Vitex</i>         | 8   | 0 | 0.0 |
| <i>Symplocos</i>     | 204 | 0 | 0.0 |
| <i>Hypericum</i>     | 5   | 0 | 0.0 |
| <i>Sanguisorba</i>   | 6   | 0 | 0.0 |
| <i>Hedyotis</i>      | 54  | 0 | 0.0 |
| <i>Hypochaeris</i>   | 88  | 0 | 0.0 |
| <i>Phyllanthus</i>   | 53  | 0 | 0.0 |
| <i>Lloydia</i>       | 5   | 0 | 0.0 |
| <i>Solidago</i>      | 314 | 0 | 0.0 |
| <i>Craspedia</i>     | 4   | 0 | 0.0 |
| <i>Leucogenes</i>    | 15  | 0 | 0.0 |
| <i>Raoulia</i>       | 6   | 0 | 0.0 |
| <i>Schima</i>        | 9   | 0 | 0.0 |
| <i>Stewartia</i>     | 56  | 0 | 0.0 |
| <i>Lysimachia</i>    | 112 | 0 | 0.0 |
| <i>Schizophragma</i> | 4   | 0 | 0.0 |
| <i>Leptodermis</i>   | 19  | 0 | 0.0 |
| <i>Persicaria</i>    | 37  | 0 | 0.0 |
| <i>Lavatera</i>      | 19  | 0 | 0.0 |
| <i>Fockea</i>        | 9   | 0 | 0.0 |
| <i>Vincetoxicum</i>  | 6   | 0 | 0.0 |
| <i>Loropetalum</i>   | 36  | 0 | 0.0 |
| <i>Hemsleya</i>      | 112 | 0 | 0.0 |
| <i>Schistidium</i>   | 11  | 0 | 0.0 |
| <i>Alcea</i>         | 18  | 0 | 0.0 |
| <i>Deparia</i>       | 20  | 0 | 0.0 |
| <i>Zygophyllum</i>   | 13  | 0 | 0.0 |

|                       |     |   |     |
|-----------------------|-----|---|-----|
| <i>Daphne</i>         | 56  | 0 | 0.0 |
| <i>Spathelia</i>      | 11  | 0 | 0.0 |
| <i>Aspalathus</i>     | 4   | 0 | 0.0 |
| <i>Helixanthera</i>   | 7   | 0 | 0.0 |
| <i>Caryocar</i>       | 104 | 0 | 0.0 |
| <i>Blumea</i>         | 22  | 0 | 0.0 |
| <i>Symphyotrichum</i> | 24  | 0 | 0.0 |
| <i>Ostryopsis</i>     | 28  | 0 | 0.0 |
| <i>Cordia</i>         | 48  | 0 | 0.0 |
| <i>Couepia</i>        | 4   | 0 | 0.0 |
| <i>Gagea</i>          | 177 | 0 | 0.0 |
| <i>Grewia</i>         | 8   | 0 | 0.0 |
| <i>Grabowskia</i>     | 11  | 0 | 0.0 |
| <i>Aspidosperma</i>   | 4   | 0 | 0.0 |
| <i>Melianthus</i>     | 10  | 0 | 0.0 |
| <i>Pouteria</i>       | 16  | 0 | 0.0 |
| <i>Stachyurus</i>     | 10  | 0 | 0.0 |
| <i>Draba</i>          | 6   | 0 | 0.0 |
| <i>Cistanche</i>      | 23  | 0 | 0.0 |
| <i>Malope</i>         | 6   | 0 | 0.0 |
| <i>Ptychomnion</i>    | 10  | 0 | 0.0 |
| <i>Malva</i>          | 72  | 0 | 0.0 |
| <i>Sinosenecio</i>    | 76  | 0 | 0.0 |
| <i>Anthemis</i>       | 4   | 0 | 0.0 |
| <i>Tanacetum</i>      | 16  | 0 | 0.0 |
| <i>Combretum</i>      | 16  | 0 | 0.0 |
| <i>Croton</i>         | 13  | 0 | 0.0 |
| <i>Mikania</i>        | 10  | 0 | 0.0 |
| <i>Opuntia</i>        | 17  | 0 | 0.0 |
| <i>Omphalogramma</i>  | 39  | 0 | 0.0 |
| <i>Jacquemontia</i>   | 8   | 0 | 0.0 |
| <i>Casearia</i>       | 4   | 0 | 0.0 |
| <i>Castanopsis</i>    | 54  | 0 | 0.0 |
| <i>Grimmia</i>        | 73  | 0 | 0.0 |
| <i>Anthyllis</i>      | 21  | 0 | 0.0 |
| <i>Psidium</i>        | 4   | 0 | 0.0 |
| <i>Caralluma</i>      | 8   | 0 | 0.0 |
| <i>Tolpis</i>         | 10  | 0 | 0.0 |
| <i>Ampelopsis</i>     | 36  | 0 | 0.0 |
| <i>Ampelocissus</i>   | 4   | 0 | 0.0 |
| <i>Picconia</i>       | 9   | 0 | 0.0 |
| <i>Mammillaria</i>    | 4   | 0 | 0.0 |
| <i>Cliffortia</i>     | 26  | 0 | 0.0 |
| <i>Bistorta</i>       | 12  | 0 | 0.0 |
| <i>Oxyria</i>         | 56  | 0 | 0.0 |
| <i>Pyracantha</i>     | 23  | 0 | 0.0 |
| <i>Althaea</i>        | 23  | 0 | 0.0 |
| <i>Calliandra</i>     | 4   | 0 | 0.0 |
| <i>Cayratia</i>       | 15  | 0 | 0.0 |
| <i>Cissus</i>         | 19  | 0 | 0.0 |
| <i>Tetrastigma</i>    | 86  | 0 | 0.0 |
| <i>Pfeiffera</i>      | 13  | 0 | 0.0 |
| <i>Rhipsalis</i>      | 27  | 0 | 0.0 |
| <i>Lepismium</i>      | 8   | 0 | 0.0 |
| <i>Pyrrrosia</i>      | 9   | 0 | 0.0 |
| <i>Wolffia</i>        | 18  | 0 | 0.0 |



|                         |     |   |     |
|-------------------------|-----|---|-----|
| <i>Wolffiella</i>       | 20  | 0 | 0.0 |
| <i>Eperua</i>           | 8   | 0 | 0.0 |
| <i>Inga</i>             | 84  | 0 | 0.0 |
| <i>Synthyris</i>        | 549 | 0 | 0.0 |
| <i>Protium</i>          | 15  | 0 | 0.0 |
| <i>Galinsoga</i>        | 5   | 0 | 0.0 |
| <i>Melampodium</i>      | 234 | 0 | 0.0 |
| <i>Syzygium</i>         | 9   | 0 | 0.0 |
| <i>Clinopodium</i>      | 13  | 0 | 0.0 |
| <i>Conradina</i>        | 20  | 0 | 0.0 |
| <i>Encelia</i>          | 20  | 0 | 0.0 |
| <i>Myricaria</i>        | 56  | 0 | 0.0 |
| <i>Enceliopsis</i>      | 4   | 0 | 0.0 |
| <i>Aronia</i>           | 6   | 0 | 0.0 |
| <i>Brosimum</i>         | 212 | 0 | 0.0 |
| <i>Hoodia</i>           | 12  | 0 | 0.0 |
| <i>Carapa</i>           | 18  | 0 | 0.0 |
| <i>Rhodiola</i>         | 26  | 0 | 0.0 |
| <i>Isodon</i>           | 55  | 0 | 0.0 |
| <i>Faurea</i>           | 6   | 0 | 0.0 |
| <i>Thladiantha</i>      | 86  | 0 | 0.0 |
| <i>Tarasa</i>           | 13  | 0 | 0.0 |
| <i>Macrosolen</i>       | 6   | 0 | 0.0 |
| <i>Scurrula</i>         | 5   | 0 | 0.0 |
| <i>Taxillus</i>         | 19  | 0 | 0.0 |
| <i>Micropholis</i>      | 14  | 0 | 0.0 |
| <i>Chamerion</i>        | 7   | 0 | 0.0 |
| <i>Cristaria</i>        | 4   | 0 | 0.0 |
| <i>Miconia</i>          | 5   | 0 | 0.0 |
| <i>Cota</i>             | 6   | 0 | 0.0 |
| <i>Palaua</i>           | 7   | 0 | 0.0 |
| <i>Searsia</i>          | 9   | 0 | 0.0 |
| <i>Phlomis</i>          | 27  | 0 | 0.0 |
| <i>Elephantopus</i>     | 9   | 0 | 0.0 |
| <i>Glossoloma</i>       | 4   | 0 | 0.0 |
| <i>Myrcia</i>           | 14  | 0 | 0.0 |
| <i>Polyphlebium</i>     | 7   | 0 | 0.0 |
| <i>Mariosousa</i>       | 4   | 0 | 0.0 |
| <i>Vachellia</i>        | 17  | 0 | 0.0 |
| <i>Pugionium</i>        | 10  | 0 | 0.0 |
| <i>Sorosseris</i>       | 16  | 0 | 0.0 |
| <i>Dasiphora</i>        | 14  | 0 | 0.0 |
| <i>Niphotrichum</i>     | 14  | 0 | 0.0 |
| <i>Bucklandiella</i>    | 6   | 0 | 0.0 |
| <i>Codriophorus</i>     | 12  | 0 | 0.0 |
| <i>Pityopsis</i>        | 12  | 0 | 0.0 |
| <i>Chaetoseris</i>      | 4   | 0 | 0.0 |
| <i>Razafimandimbiso</i> | 6   | 0 | 0.0 |
| <i>Nyholmiella</i>      | 8   | 0 | 0.0 |
| <i>Pterygiella</i>      | 47  | 0 | 0.0 |
| <i>Pilosocereus</i>     | 48  | 0 | 0.0 |
| <i>Nabalus</i>          | 16  | 0 | 0.0 |
| <i>Talipariti</i>       | 25  | 0 | 0.0 |
| <i>Syncalathium</i>     | 24  | 0 | 0.0 |
