# Supplementary material for: Utility of the trnH–psbA Intergenic Spacer Region and Its Combinations as Plant DNA Barcodes: A Meta-Analysis
Source: PubMed Central journal article supplement (PMC3498263; doi:10.1371/journal.pone.0048833), 2012-11-14
Supplement: pone.0048833.s009.pdf [file pone.0048833.s009.pdf]

**Table S9.** Intra- and interspecific distances of congeneric species in the five major plant taxonomic groups.

| <b>Taxa</b>                    | <b>Eudicotyledons</b> | <b>Monocotyledons</b> | <b>Gymnosperms</b> | <b>Ferns</b>  | <b>Mosses</b> |
|--------------------------------|-----------------------|-----------------------|--------------------|---------------|---------------|
| Theta                          | 0.0145±0.0590         | 0.0080±0.0216         | 0.0027±0.0073      | 0.0045±0.0145 | 0.0113±0.0245 |
| Coalescent depth               | 0.0238±0.0871         | 0.0135±0.0418         | 0.0070±0.0360      | 0.0071±0.0267 | 0.0174±0.0352 |
| All interspecific distance     | 0.0447±0.1021         | 0.0283±0.0407         | 0.0086±0.0171      | 0.0302±0.0430 | 0.0206±0.0197 |
| Theta prime                    | 0.0474±0.0736         | 0.0246±0.0306         | 0.0151±0.0147      | 0.0790±0.0959 | 0.0297±0.0261 |
| Minimum interspecific distance | 0.0104±0.0280         | 0.0068±0.0183         | 0.0028±0.0080      | 0.0269±0.0572 | 0.0108±0.0147 |
