# Supplementary material for: Utility of the trnH–psbA Intergenic Spacer Region and Its Combinations as Plant DNA Barcodes: A Meta-Analysis
Source: PubMed Central journal article supplement (PMC3498263; doi:10.1371/journal.pone.0048833), 2012-11-14
Supplement: pone.0048833.s010.pdf [file pone.0048833.s010.pdf]

**Table S10.** Identification success rates of *trnH-psbA* using BLAST and BLAST+P distance in selected families with fewer than 20 species.

| Family           | No. of genera | No. of species | No. of samples | BLAST       | BLAST+ P distance |
|------------------|---------------|----------------|----------------|-------------|-------------------|
|                  |               |                |                | Success (%) | Success (%)       |
| Caryophyllaceae  | 3             | 19             | 247            | 52.6        | 69.2              |
| Apocynaceae      | 7             | 19             | 51             | 49.0        | 58.8              |
| Arecaceae        | 5             | 19             | 66             | 51.5        | 60.6              |
| Gentianaceae     | 3             | 19             | 56             | 71.4        | 91.1              |
| Theaceae         | 2             | 19             | 65             | 43.1        | 47.7              |
| Aceraceae        | 1             | 19             | 445            | 51.7        | 54.2              |
| Gesneriaceae     | 2             | 18             | 45             | 48.9        | 57.8              |
| Sapotaceae       | 4             | 17             | 45             | 48.9        | 68.9              |
| Musaceae         | 1             | 17             | 72             | 23.6        | 51.4              |
| Grimmiaceae      | 5             | 17             | 116            | 68.1        | 76.7              |
| Araucariaceae    | 1             | 16             | 46             | 28.3        | 34.8              |
| Cupressaceae     | 2             | 15             | 73             | 67.1        | 67.1              |
| Caprifoliaceae   | 2             | 15             | 73             | 76.7        | 80.8              |
| Amoryllidaceae   | 2             | 15             | 36             | 38.9        | 58.3              |
| Taxaceae         | 3             | 15             | 68             | 50.0        | 58.8              |
| Berberidaceae    | 1             | 14             | 83             | 10.8        | 12.0              |
| Phyllanthaceae   | 1             | 14             | 53             | 96.2        | 100.0             |
| Myrtaceae        | 4             | 13             | 34             | 82.4        | 88.2              |
| Aquifoliaceae    | 1             | 13             | 44             | 43.2        | 70.5              |
| Hydrangeaceae    | 2             | 13             | 36             | 77.8        | 83.3              |
| Cornaceae        | 2             | 13             | 46             | 39.1        | 43.5              |
| Amaranthaceae    | 3             | 12             | 77             | 61.0        | 61.0              |
| Campanulaceae    | 2             | 12             | 40             | 82.5        | 85.0              |
| Orthotrichaceae  | 2             | 12             | 41             | 41.5        | 51.2              |
| Rutaceae         | 2             | 11             | 47             | 57.4        | 76.6              |
| Tamaricaceae     | 1             | 11             | 56             | 58.9        | 67.9              |
| Saxifragaceae    | 1             | 10             | 102            | 61.8        | 92.2              |
| Loranthaceae     | 4             | 10             | 37             | 100.0       | 100.0             |
| Alismataceae     | 2             | 10             | 51             | 25.5        | 25.5              |
| Potamogetonaceae | 1             | 10             | 25             | 68.0        | 68.0              |
| Grossulariaceae  | 1             | 10             | 32             | 65.6        | 65.6              |
| Hyacinthaceae    | 1             | 10             | 59             | 81.4        | 86.4              |
| Cephalotaxaceae  | 1             | 10             | 59             | 18.6        | 18.6              |
| Crassulaceae     | 2             | 9              | 32             | 93.8        | 96.9              |
| Xanthorrhoeaceae | 1             | 9              | 29             | 48.3        | 48.3              |
| Hymenophyllaceae | 3             | 9              | 34             | 100.0       | 100.0             |
| Hamamelidaceae   | 3             | 9              | 61             | 63.9        | 68.9              |
| Passifloraceae   | 1             | 8              | 41             | 100.0       | 100.0             |
| Convolvulaceae   | 2             | 8              | 69             | 27.5        | 31.9              |
| Nothofagaceae    | 1             | 8              | 47             | 21.3        | 21.3              |
| Zygophyllaceae   | 2             | 8              | 122            | 96.7        | 96.7              |
| Acanthaceae      | 1             | 7              | 24             | 33.3        | 50.0              |
| Violaceae        | 1             | 7              | 14             | 57.1        | 100.0             |
| Meliaceae        | 3             | 7              | 32             | 78.1        | 90.6              |
| Ephedraceae      | 1             | 6              | 15             | 40.0        | 40.0              |
| Combretaceae     | 1             | 6              | 16             | 93.8        | 93.8              |
| Chrysobalanaceae | 2             | 6              | 14             | 100.0       | 100.0             |
| Paeoniaceae      | 1             | 6              | 36             | 55.6        | 100.0             |
| Hydrocharitaceae | 1             | 6              | 26             | 84.6        | 84.6              |

|                  |   |   |     |       |       |
|------------------|---|---|-----|-------|-------|
| Aspleniaceae     | 1 | 6 | 18  | 100.0 | 100.0 |
| Nitrariaceae     | 2 | 6 | 23  | 26.1  | 82.6  |
| Euphorbiaceae    | 1 | 5 | 13  | 100.0 | 100.0 |
| Oxalidaceae      | 1 | 5 | 31  | 96.8  | 100.0 |
| Juglandaceae     | 1 | 5 | 11  | 54.5  | 54.5  |
| Symplocaceae     | 1 | 5 | 204 | 84.8  | 100.0 |
| Thymelaeaceae    | 1 | 5 | 56  | 91.1  | 100.0 |
| Melastomataceae  | 2 | 5 | 15  | 86.7  | 100.0 |
| Onagraceae       | 2 | 4 | 11  | 100.0 | 100.0 |
| Geraniaceae      | 1 | 4 | 10  | 70.0  | 100.0 |
| Loganiaceae      | 1 | 4 | 13  | 84.6  | 100.0 |
| Brachytheciaceae | 1 | 4 | 12  | 83.3  | 100.0 |
| Acoraceae        | 1 | 4 | 44  | 75.0  | 75.0  |
| Hypnaceae        | 1 | 4 | 9   | 22.2  | 22.2  |
| Caryocaraceae    | 1 | 4 | 104 | 39.4  | 47.1  |
| Altingiaceae     | 1 | 4 | 33  | 87.9  | 87.9  |
| Ptychomniaceae   | 1 | 4 | 10  | 40.0  | 40.0  |
| Woodsiaceae      | 1 | 4 | 20  | 100.0 | 100.0 |
| Polytrichaceae   | 1 | 3 | 12  | 91.7  | 100.0 |
| Dicranaceae      | 1 | 3 | 64  | 100.0 | 100.0 |
| Mniaceae         | 1 | 3 | 9   | 100.0 | 100.0 |
| Polypodiaceae    | 1 | 3 | 9   | 66.7  | 66.7  |
| Linaceae         | 1 | 3 | 15  | 13.3  | 13.3  |
| Anacardiaceae    | 1 | 3 | 9   | 0.0   | 100.0 |
| Platanaceae      | 1 | 3 | 16  | 0.0   | 0.0   |
| Plumbaginaceae   | 1 | 3 | 57  | 12.3  | 87.7  |
| Smilacaceae      | 1 | 3 | 10  | 100.0 | 100.0 |
| Commelinaceae    | 1 | 3 | 7   | 100.0 | 100.0 |
| Ebenaceae        | 1 | 3 | 7   | 28.6  | 28.6  |
| Zosteraceae      | 1 | 3 | 8   | 100.0 | 100.0 |
| Melianthaceae    | 1 | 3 | 10  | 30.0  | 100.0 |
| Stachyuraceae    | 1 | 3 | 10  | 30.0  | 50.0  |
| Lygodiaceae      | 1 | 3 | 17  | 100.0 | 100.0 |
| Podocarpaceae    | 1 | 2 | 13  | 100.0 | 100.0 |
| Papaveraceae     | 1 | 2 | 5   | 100.0 | 100.0 |
| Rhamnaceae       | 1 | 2 | 7   | 100.0 | 100.0 |
| Santalaceae      | 1 | 2 | 8   | 100.0 | 100.0 |
| Proteaceae       | 1 | 2 | 6   | 0.0   | 0.0   |
| Heliconiaceae    | 1 | 2 | 4   | 100.0 | 100.0 |
| Hypoxidaceae     | 1 | 2 | 123 | 0.0   | 46.3  |
| Pandanaceae      | 1 | 2 | 5   | 100.0 | 100.0 |
| Typhaceae        | 1 | 2 | 6   | 50.0  | 50.0  |
| Sphagnaceae      | 1 | 2 | 4   | 100.0 | 100.0 |
| Juncaceae        | 1 | 2 | 5   | 100.0 | 100.0 |
| Styracaceae      | 1 | 2 | 5   | 100.0 | 100.0 |
| Boraginaceae     | 1 | 2 | 48  | 100.0 | 100.0 |
| Verbenaceae      | 1 | 2 | 4   | 100.0 | 100.0 |
| Balsaminaceae    | 1 | 2 | 4   | 100.0 | 100.0 |
| Cymodoceaceae    | 1 | 2 | 13  | 100.0 | 100.0 |
| Elaeagnaceae     | 1 | 2 | 10  | 100.0 | 100.0 |
| Elaeocarpaceae   | 1 | 2 | 4   | 100.0 | 100.0 |
| Eriocaulaceae    | 1 | 2 | 6   | 100.0 | 100.0 |
| Lomariopsidaceae | 1 | 2 | 4   | 50.0  | 50.0  |

|              |   |   |   |       |       |
|--------------|---|---|---|-------|-------|
| Stemonaceae  | 1 | 2 | 5 | 100.0 | 100.0 |
| Hypericaceae | 1 | 2 | 5 | 100.0 | 100.0 |
