# Supplementary material for: Utility of the trnH–psbA Intergenic Spacer Region and Its Combinations as Plant DNA Barcodes: A Meta-Analysis
Source: PubMed Central journal article supplement (PMC3498263; doi:10.1371/journal.pone.0048833), 2012-11-14
Supplement: pone.0048833.s011.pdf [file pone.0048833.s011.pdf]

**Table S11.** Identification success rates of *trnH-psbA* using BLAST and BLAST+P distance in genera with fewer than 20 species.

| Genus               | No. of species | No. of samples | BLAST       | BLAST+ P distance |
|---------------------|----------------|----------------|-------------|-------------------|
|                     |                |                | Success (%) | Success (%)       |
| <i>Prunus</i>       | 19             | 89             | 33.7        | 41.6              |
| <i>Acer</i>         | 19             | 445            | 51.7        | 54.2              |
| <i>Antirrhinum</i>  | 19             | 65             | 24.6        | 24.6              |
| <i>Colchicum</i>    | 19             | 46             | 58.7        | 60.9              |
| <i>Kaempferia</i>   | 19             | 74             | 24.3        | 51.4              |
| <i>Carex</i>        | 18             | 53             | 3.8         | 52.8              |
| <i>Salvia</i>       | 18             | 49             | 75.5        | 81.6              |
| <i>Dendrobium</i>   | 18             | 47             | 95.7        | 95.7              |
| <i>Salix</i>        | 18             | 42             | 61.9        | 69.0              |
| <i>Arctotis</i>     | 18             | 38             | 28.9        | 31.6              |
| <i>Delphinium</i>   | 18             | 46             | 19.6        | 28.3              |
| <i>Rosa</i>         | 17             | 41             | 22.0        | 56.1              |
| <i>Acacia</i>       | 17             | 67             | 95.5        | 100.0             |
| <i>Viburnum</i>     | 17             | 70             | 18.6        | 54.3              |
| <i>Musa</i>         | 17             | 72             | 23.6        | 51.4              |
| <i>Araucaria</i>    | 16             | 46             | 28.3        | 34.8              |
| <i>Cyrtandra</i>    | 16             | 41             | 43.9        | 53.7              |
| <i>Paris</i>        | 16             | 81             | 22.2        | 49.4              |
| <i>Lamium</i>       | 16             | 46             | 37.0        | 60.9              |
| <i>Stewartia</i>    | 16             | 56             | 41.1        | 44.6              |
| <i>Bursera</i>      | 15             | 354            | 85.6        | 88.7              |
| <i>Ligustrum</i>    | 15             | 86             | 52.3        | 54.7              |
| <i>Potentilla</i>   | 15             | 89             | 36.0        | 49.4              |
| <i>Nolana</i>       | 15             | 38             | 36.8        | 52.6              |
| <i>Cheilanthes</i>  | 15             | 55             | 43.6        | 45.5              |
| <i>Kengyilia</i>    | 15             | 101            | 21.8        | 28.7              |
| <i>Castanopsis</i>  | 15             | 54             | 7.4         | 40.7              |
| <i>Aechmea</i>      | 14             | 36             | 22.2        | 33.3              |
| <i>Berberis</i>     | 14             | 83             | 10.8        | 12.0              |
| <i>Dendropanax</i>  | 14             | 36             | 41.7        | 41.7              |
| <i>Phyllanthus</i>  | 14             | 53             | 96.2        | 100.0             |
| <i>Malva</i>        | 14             | 72             | 18.1        | 44.4              |
| <i>Melampodium</i>  | 14             | 234            | 95.7        | 95.7              |
| <i>Thladiantha</i>  | 14             | 86             | 58.1        | 96.5              |
| <i>Ligularia</i>    | 13             | 41             | 22.0        | 26.8              |
| <i>Ilex</i>         | 13             | 44             | 43.2        | 70.5              |
| <i>Maianthemum</i>  | 13             | 68             | 32.4        | 45.6              |
| <i>Bulbophyllum</i> | 13             | 30             | 90.0        | 90.0              |
| <i>Hedyotis</i>     | 13             | 54             | 50.0        | 88.9              |
| <i>Cliffortia</i>   | 13             | 26             | 76.9        | 88.5              |
| <i>Capsicum</i>     | 12             | 42             | 71.4        | 71.4              |
| <i>Petunia</i>      | 12             | 507            | 9.9         | 25.2              |
| <i>Glyceria</i>     | 12             | 86             | 9.3         | 9.3               |
| <i>Lonicera</i>     | 12             | 60             | 71.7        | 76.7              |
| <i>Persicaria</i>   | 12             | 37             | 48.6        | 70.3              |
| <i>Lycoris</i>      | 12             | 24             | 16.7        | 45.8              |
| <i>Isodon</i>       | 12             | 55             | 49.1        | 58.2              |
| <i>Hydrangea</i>    | 11             | 32             | 75.0        | 81.3              |
| <i>Senna</i>        | 11             | 29             | 75.9        | 100.0             |

|                       |    |     |       |       |
|-----------------------|----|-----|-------|-------|
| <i>Solidago</i>       | 11 | 314 | 2.2   | 5.1   |
| <i>Rhipsalis</i>      | 11 | 27  | 55.6  | 74.1  |
| <i>Myricaria</i>      | 11 | 56  | 58.9  | 67.9  |
| <i>Bryonia</i>        | 10 | 145 | 64.1  | 64.1  |
| <i>Ribes</i>          | 10 | 32  | 65.6  | 65.6  |
| <i>Veronica</i>       | 10 | 70  | 28.6  | 42.9  |
| <i>Juniperus</i>      | 10 | 54  | 55.6  | 55.6  |
| <i>Potamogeton</i>    | 10 | 25  | 68.0  | 68.0  |
| <i>Achillea</i>       | 10 | 62  | 8.1   | 22.6  |
| <i>Gazania</i>        | 10 | 20  | 25.0  | 55.0  |
| <i>Lycium</i>         | 10 | 32  | 78.1  | 84.4  |
| <i>Swertia</i>        | 10 | 33  | 72.7  | 97.0  |
| <i>Mitella</i>        | 10 | 102 | 61.8  | 92.2  |
| <i>Santolina</i>      | 10 | 39  | 10.3  | 10.3  |
| <i>Mussaenda</i>      | 10 | 30  | 56.7  | 73.3  |
| <i>Vriesea</i>        | 10 | 25  | 20.0  | 20.0  |
| <i>Cephalotaxus</i>   | 10 | 59  | 18.6  | 18.6  |
| <i>Orthotrichum</i>   | 10 | 33  | 45.5  | 57.6  |
| <i>Blumea</i>         | 10 | 22  | 100.0 | 100.0 |
| <i>Hyacinthoides</i>  | 10 | 59  | 81.4  | 86.4  |
| <i>Ampelopsis</i>     | 10 | 36  | 30.6  | 50.0  |
| <i>Cyrtochilum</i>    | 10 | 25  | 76.0  | 76.0  |
| <i>Synthyris</i>      | 10 | 549 | 19.5  | 23.7  |
| <i>Dianthus</i>       | 9  | 46  | 13.0  | 69.6  |
| <i>Trichosanthes</i>  | 9  | 38  | 81.6  | 81.6  |
| <i>Arnica</i>         | 9  | 18  | 38.9  | 50.0  |
| <i>Mentha</i>         | 9  | 85  | 49.4  | 61.2  |
| <i>Haworthia</i>      | 9  | 29  | 48.3  | 48.3  |
| <i>Oldenlandia</i>    | 9  | 39  | 64.1  | 92.3  |
| <i>Alcea</i>          | 9  | 18  | 5.6   | 5.6   |
| <i>Symphyotrichum</i> | 9  | 24  | 8.3   | 33.3  |
| <i>Curcuma</i>        | 9  | 61  | 19.7  | 42.6  |
| <i>Anthyllis</i>      | 9  | 21  | 90.5  | 100.0 |
| <i>Silene</i>         | 8  | 197 | 60.9  | 68.5  |
| <i>Passiflora</i>     | 8  | 41  | 100.0 | 100.0 |
| <i>Carpinus</i>       | 8  | 31  | 45.2  | 74.2  |
| <i>Echinodorus</i>    | 8  | 39  | 30.8  | 30.8  |
| <i>Tragopogon</i>     | 8  | 22  | 90.9  | 95.5  |
| <i>Cyananthus</i>     | 8  | 30  | 76.7  | 80.0  |
| <i>Nothofagus</i>     | 8  | 47  | 21.3  | 21.3  |
| <i>Centaurea</i>      | 8  | 65  | 33.8  | 38.5  |
| <i>Osmorhiza</i>      | 8  | 31  | 35.5  | 58.1  |
| <i>Dalbergia</i>      | 8  | 31  | 93.5  | 93.5  |
| <i>Leptodermis</i>    | 8  | 19  | 89.5  | 100.0 |
| <i>Tanacetum</i>      | 8  | 16  | 12.5  | 50.0  |
| <i>Arenga</i>         | 8  | 30  | 20.0  | 26.7  |
| <i>Cissus</i>         | 8  | 19  | 100.0 | 100.0 |
| <i>Citrus</i>         | 7  | 36  | 52.8  | 75.0  |
| <i>Panax</i>          | 7  | 33  | 66.7  | 66.7  |
| <i>Nyssa</i>          | 7  | 30  | 6.7   | 13.3  |
| <i>Lemna</i>          | 7  | 29  | 79.3  | 79.3  |
| <i>Bambusa</i>        | 7  | 15  | 26.7  | 26.7  |
| <i>Chrysanthemum</i>  | 7  | 46  | 21.7  | 32.6  |

|                       |   |    |       |       |
|-----------------------|---|----|-------|-------|
| <i>Ruellia</i>        | 7 | 24 | 33.3  | 50.0  |
| <i>Viola</i>          | 7 | 14 | 57.1  | 100.0 |
| <i>Polygonatum</i>    | 7 | 31 | 29.0  | 29.0  |
| <i>Anemone</i>        | 7 | 40 | 62.5  | 85.0  |
| <i>Rubus</i>          | 7 | 39 | 94.9  | 94.9  |
| <i>Psychotria</i>     | 7 | 18 | 88.9  | 100.0 |
| <i>Taxus</i>          | 7 | 39 | 43.6  | 59.0  |
| <i>Caesalpinia</i>    | 7 | 75 | 85.3  | 100.0 |
| <i>Lavatera</i>       | 7 | 19 | 31.6  | 73.7  |
| <i>Omphalogramma</i>  | 7 | 39 | 82.1  | 100.0 |
| <i>Grimmia</i>        | 7 | 73 | 80.8  | 80.8  |
| <i>Encelia</i>        | 7 | 20 | 25.0  | 45.0  |
| <i>Holcoglossum</i>   | 7 | 33 | 42.4  | 42.4  |
| <i>Nabalus</i>        | 7 | 16 | 31.3  | 31.3  |
| <i>Syncalathium</i>   | 7 | 24 | 75.0  | 87.5  |
| <i>Ephedra</i>        | 6 | 15 | 40.0  | 40.0  |
| <i>Coptis</i>         | 6 | 39 | 66.7  | 69.2  |
| <i>Ranunculus</i>     | 6 | 15 | 46.7  | 60.0  |
| <i>Hedera</i>         | 6 | 15 | 26.7  | 26.7  |
| <i>Cornus</i>         | 6 | 16 | 100.0 | 100.0 |
| <i>Cyperus</i>        | 6 | 13 | 100.0 | 100.0 |
| <i>Najas</i>          | 6 | 26 | 84.6  | 84.6  |
| <i>Paeonia</i>        | 6 | 36 | 55.6  | 100.0 |
| <i>Senecio</i>        | 6 | 18 | 61.1  | 72.2  |
| <i>Schotia</i>        | 6 | 49 | 18.4  | 49.0  |
| <i>Gentiana</i>       | 6 | 14 | 71.4  | 71.4  |
| <i>Asplenium</i>      | 6 | 18 | 100.0 | 100.0 |
| <i>Cypripedium</i>    | 6 | 13 | 100.0 | 100.0 |
| <i>Heracleum</i>      | 6 | 17 | 23.5  | 29.4  |
| <i>Morinda</i>        | 6 | 18 | 0.0   | 5.6   |
| <i>Tacca</i>          | 6 | 58 | 60.3  | 79.3  |
| <i>Peucedanum</i>     | 6 | 19 | 100.0 | 100.0 |
| <i>Erythronium</i>    | 6 | 48 | 29.2  | 31.3  |
| <i>Veratrum</i>       | 6 | 45 | 31.1  | 31.1  |
| <i>Pieris</i>         | 6 | 15 | 80.0  | 86.7  |
| <i>Androcymbium</i>   | 6 | 15 | 100.0 | 100.0 |
| <i>Zygophyllum</i>    | 6 | 13 | 69.2  | 69.2  |
| <i>Pouteria</i>       | 6 | 16 | 50.0  | 56.3  |
| <i>Combretum</i>      | 6 | 16 | 93.8  | 93.8  |
| <i>Althaea</i>        | 6 | 23 | 21.7  | 52.2  |
| <i>Pfeiffera</i>      | 6 | 13 | 7.7   | 69.2  |
| <i>Erycina</i>        | 6 | 15 | 100.0 | 100.0 |
| <i>Conradina</i>      | 6 | 20 | 50.0  | 65.0  |
| <i>Rhodiola</i>       | 6 | 26 | 92.3  | 96.2  |
| <i>Tarasa</i>         | 6 | 13 | 69.2  | 100.0 |
| <i>Amaranthus</i>     | 5 | 37 | 18.9  | 18.9  |
| <i>Parthenocissus</i> | 5 | 15 | 46.7  | 46.7  |
| <i>Rumex</i>          | 5 | 14 | 64.3  | 64.3  |
| <i>Populus</i>        | 5 | 13 | 84.6  | 100.0 |
| <i>Leucaena</i>       | 5 | 19 | 10.5  | 10.5  |
| <i>Wisteria</i>       | 5 | 16 | 68.8  | 75.0  |
| <i>Oxalis</i>         | 5 | 31 | 96.8  | 100.0 |
| <i>Convolvulus</i>    | 5 | 61 | 26.2  | 26.2  |

|                     |   |     |       |       |
|---------------------|---|-----|-------|-------|
| <i>Scutellaria</i>  | 5 | 28  | 92.9  | 100.0 |
| <i>Sambucus</i>     | 5 | 29  | 62.1  | 96.6  |
| <i>Festuca</i>      | 5 | 20  | 25.0  | 25.0  |
| <i>Asparagus</i>    | 5 | 29  | 82.8  | 89.7  |
| <i>Caryota</i>      | 5 | 21  | 81.0  | 85.7  |
| <i>Cupressus</i>    | 5 | 19  | 100.0 | 100.0 |
| <i>Ostrya</i>       | 5 | 14  | 42.9  | 100.0 |
| <i>Juglans</i>      | 5 | 11  | 54.5  | 54.5  |
| <i>Photinia</i>     | 5 | 11  | 54.5  | 63.6  |
| <i>Nassella</i>     | 5 | 13  | 23.1  | 23.1  |
| <i>Origanum</i>     | 5 | 22  | 63.6  | 68.2  |
| <i>Polygonum</i>    | 5 | 19  | 100.0 | 100.0 |
| <i>Nidularium</i>   | 5 | 11  | 0.0   | 0.0   |
| <i>Thymus</i>       | 5 | 25  | 44.0  | 80.0  |
| <i>Symplocos</i>    | 5 | 204 | 84.8  | 100.0 |
| <i>Daphne</i>       | 5 | 56  | 91.1  | 100.0 |
| <i>Boesenbergia</i> | 5 | 11  | 54.5  | 100.0 |
| <i>Croton</i>       | 5 | 13  | 100.0 | 100.0 |
| <i>Tolpis</i>       | 5 | 10  | 60.0  | 80.0  |
| <i>Paspalum</i>     | 5 | 14  | 42.9  | 42.9  |
| <i>Wolffiella</i>   | 5 | 20  | 60.0  | 70.0  |
| <i>Protium</i>      | 5 | 15  | 60.0  | 100.0 |
| <i>Clinopodium</i>  | 5 | 13  | 100.0 | 100.0 |
| <i>Micropholis</i>  | 5 | 14  | 71.4  | 71.4  |
| <i>Myrcia</i>       | 5 | 14  | 85.7  | 85.7  |
| <i>Jarava</i>       | 5 | 15  | 60.0  | 60.0  |
| <i>Pityopsis</i>    | 5 | 12  | 0.0   | 16.7  |
| <i>Betula</i>       | 4 | 13  | 30.8  | 30.8  |
| <i>Quercus</i>      | 4 | 102 | 93.1  | 93.1  |
| <i>Chenopodium</i>  | 4 | 31  | 100.0 | 100.0 |
| <i>Gossypium</i>    | 4 | 37  | 2.7   | 32.4  |
| <i>Capsella</i>     | 4 | 13  | 53.8  | 76.9  |
| <i>Fragaria</i>     | 4 | 10  | 10.0  | 80.0  |
| <i>Canavalia</i>    | 4 | 15  | 6.7   | 33.3  |
| <i>Geranium</i>     | 4 | 10  | 70.0  | 100.0 |
| <i>Hydrocotyle</i>  | 4 | 29  | 72.4  | 100.0 |
| <i>Lobelia</i>      | 4 | 10  | 100.0 | 100.0 |
| <i>Hamamelis</i>    | 4 | 15  | 0.0   | 20.0  |
| <i>Liquidambar</i>  | 4 | 33  | 87.9  | 87.9  |
| <i>Acorus</i>       | 4 | 44  | 75.0  | 75.0  |
| <i>Cassiope</i>     | 4 | 14  | 35.7  | 35.7  |
| <i>Corylus</i>      | 4 | 9   | 44.4  | 55.6  |
| <i>Elymus</i>       | 4 | 10  | 70.0  | 80.0  |
| <i>Lepidium</i>     | 4 | 26  | 50.0  | 50.0  |
| <i>Astragalus</i>   | 4 | 19  | 100.0 | 100.0 |
| <i>Fagus</i>        | 4 | 17  | 23.5  | 29.4  |
| <i>Teucrium</i>     | 4 | 8   | 75.0  | 100.0 |
| <i>Licania</i>      | 4 | 10  | 100.0 | 100.0 |
| <i>Amelanchier</i>  | 4 | 8   | 25.0  | 50.0  |
| <i>Amentotaxus</i>  | 4 | 19  | 63.2  | 63.2  |
| <i>Strychnos</i>    | 4 | 13  | 84.6  | 100.0 |
| <i>Plantago</i>     | 4 | 36  | 63.9  | 66.7  |
| <i>Crepidomanes</i> | 4 | 12  | 100.0 | 100.0 |

|                      |   |     |       |       |
|----------------------|---|-----|-------|-------|
| <i>Eranthis</i>      | 4 | 41  | 100.0 | 100.0 |
| <i>Cattleya</i>      | 4 | 8   | 75.0  | 100.0 |
| <i>Eragrostis</i>    | 4 | 13  | 100.0 | 100.0 |
| <i>Carlina</i>       | 4 | 8   | 100.0 | 100.0 |
| <i>Cirsium</i>       | 4 | 11  | 90.9  | 90.9  |
| <i>Haplocarpha</i>   | 4 | 8   | 100.0 | 100.0 |
| <i>Inula</i>         | 4 | 11  | 100.0 | 100.0 |
| <i>Pleurospermum</i> | 4 | 14  | 100.0 | 100.0 |
| <i>Hypnum</i>        | 4 | 9   | 22.2  | 22.2  |
| <i>Torreya</i>       | 4 | 10  | 50.0  | 50.0  |
| <i>Arisaema</i>      | 4 | 9   | 33.3  | 100.0 |
| <i>Cardamine</i>     | 4 | 15  | 80.0  | 100.0 |
| <i>Brachythecium</i> | 4 | 12  | 83.3  | 100.0 |
| <i>Lespedeza</i>     | 4 | 8   | 50.0  | 62.5  |
| <i>Deparia</i>       | 4 | 20  | 100.0 | 100.0 |
| <i>Spathelia</i>     | 4 | 11  | 72.7  | 81.8  |
| <i>Caryocar</i>      | 4 | 104 | 39.4  | 47.1  |
| <i>Cistanche</i>     | 4 | 23  | 100.0 | 100.0 |
| <i>Ptychomnion</i>   | 4 | 10  | 40.0  | 40.0  |
| <i>Opuntia</i>       | 4 | 17  | 0.0   | 17.6  |
| <i>Caralluma</i>     | 4 | 8   | 50.0  | 75.0  |
| <i>Pyracantha</i>    | 4 | 23  | 4.3   | 21.7  |
| <i>Cayratia</i>      | 4 | 15  | 100.0 | 100.0 |
| <i>Comparettia</i>   | 4 | 8   | 100.0 | 100.0 |
| <i>Tolumnia</i>      | 4 | 8   | 100.0 | 100.0 |
| <i>Wolffia</i>       | 4 | 18  | 100.0 | 100.0 |
| <i>Aulosepalum</i>   | 4 | 8   | 87.5  | 87.5  |
| <i>Taxillus</i>      | 4 | 19  | 100.0 | 100.0 |
| <i>Soroseris</i>     | 4 | 16  | 31.3  | 31.3  |
| <i>Pterygiella</i>   | 4 | 47  | 19.1  | 19.1  |
| <i>Pappostipa</i>    | 4 | 23  | 52.2  | 52.2  |
| <i>Pilosocereus</i>  | 4 | 48  | 52.1  | 52.1  |
| <i>Polytrichum</i>   | 3 | 12  | 100.0 | 100.0 |
| <i>Dicranum</i>      | 3 | 64  | 100.0 | 100.0 |
| <i>Plagiomnium</i>   | 3 | 9   | 100.0 | 100.0 |
| <i>Rheum</i>         | 3 | 10  | 20.0  | 100.0 |
| <i>Manilkara</i>     | 3 | 8   | 37.5  | 62.5  |
| <i>Malus</i>         | 3 | 7   | 42.9  | 100.0 |
| <i>Albizia</i>       | 3 | 8   | 50.0  | 100.0 |
| <i>Eucalyptus</i>    | 3 | 7   | 71.4  | 71.4  |
| <i>Linum</i>         | 3 | 15  | 13.3  | 13.3  |
| <i>Datura</i>        | 3 | 20  | 75.0  | 75.0  |
| <i>Artemisia</i>     | 3 | 8   | 100.0 | 100.0 |
| <i>Lactuca</i>       | 3 | 9   | 100.0 | 100.0 |
| <i>Platanus</i>      | 3 | 16  | 0.0   | 0.0   |
| <i>Poa</i>           | 3 | 11  | 54.5  | 54.5  |
| <i>Cenchrus</i>      | 3 | 6   | 50.0  | 50.0  |
| <i>Allium</i>        | 3 | 12  | 83.3  | 83.3  |
| <i>Commelina</i>     | 3 | 7   | 100.0 | 100.0 |
| <i>Chrysophyllum</i> | 3 | 7   | 14.3  | 100.0 |
| <i>Diospyros</i>     | 3 | 7   | 28.6  | 28.6  |
| <i>Erica</i>         | 3 | 213 | 88.3  | 98.6  |
| <i>Eupatorium</i>    | 3 | 9   | 100.0 | 100.0 |

|                        |   |     |       |       |
|------------------------|---|-----|-------|-------|
| <i>Adiantum</i>        | 3 | 6   | 100.0 | 100.0 |
| <i>Pteris</i>          | 3 | 9   | 100.0 | 100.0 |
| <i>Lygodium</i>        | 3 | 17  | 100.0 | 100.0 |
| <i>Billbergia</i>      | 3 | 8   | 12.5  | 62.5  |
| <i>Tillandsia</i>      | 3 | 6   | 100.0 | 100.0 |
| <i>Calamagrostis</i>   | 3 | 11  | 27.3  | 27.3  |
| <i>Zizania</i>         | 3 | 25  | 8.0   | 48.0  |
| <i>Valeriana</i>       | 3 | 13  | 100.0 | 100.0 |
| <i>Aeonium</i>         | 3 | 6   | 100.0 | 100.0 |
| <i>Sorbaria</i>        | 3 | 9   | 100.0 | 100.0 |
| <i>Zostera</i>         | 3 | 8   | 100.0 | 100.0 |
| <i>Phalaenopsis</i>    | 3 | 26  | 46.2  | 69.2  |
| <i>Chaenomeles</i>     | 3 | 10  | 100.0 | 100.0 |
| <i>Hymenophyllum</i>   | 3 | 15  | 100.0 | 100.0 |
| <i>Angelica</i>        | 3 | 9   | 88.9  | 100.0 |
| <i>Erigeron</i>        | 3 | 15  | 13.3  | 13.3  |
| <i>Lychnophora</i>     | 3 | 214 | 23.8  | 100.0 |
| <i>Canarium</i>        | 3 | 6   | 50.0  | 50.0  |
| <i>Nitraria</i>        | 3 | 8   | 12.5  | 50.0  |
| <i>Peganum</i>         | 3 | 15  | 33.3  | 100.0 |
| <i>Castilleja</i>      | 3 | 47  | 10.6  | 10.6  |
| <i>Limonium</i>        | 3 | 57  | 12.3  | 87.7  |
| <i>Suaeda</i>          | 3 | 9   | 100.0 | 100.0 |
| <i>Schefflera</i>      | 3 | 11  | 100.0 | 100.0 |
| <i>Smilax</i>          | 3 | 10  | 100.0 | 100.0 |
| <i>Trillium</i>        | 3 | 6   | 100.0 | 100.0 |
| <i>Sonchus</i>         | 3 | 15  | 33.3  | 33.3  |
| <i>Gentianopsis</i>    | 3 | 9   | 66.7  | 100.0 |
| <i>Corylopsis</i>      | 3 | 10  | 30.0  | 30.0  |
| <i>Vitex</i>           | 3 | 8   | 37.5  | 75.0  |
| <i>Hypochaeris</i>     | 3 | 88  | 63.6  | 67.0  |
| <i>Leucogenes</i>      | 3 | 15  | 13.3  | 20.0  |
| <i>Schima</i>          | 3 | 9   | 55.6  | 66.7  |
| <i>Fockea</i>          | 3 | 9   | 100.0 | 100.0 |
| <i>Vincetoxicum</i>    | 3 | 6   | 50.0  | 50.0  |
| <i>Schistidium</i>     | 3 | 11  | 36.4  | 36.4  |
| <i>Digitaria</i>       | 3 | 7   | 100.0 | 100.0 |
| <i>Ostryopsis</i>      | 3 | 28  | 21.4  | 71.4  |
| <i>Grewia</i>          | 3 | 8   | 37.5  | 100.0 |
| <i>Grabowskia</i>      | 3 | 11  | 18.2  | 18.2  |
| <i>Melianthus</i>      | 3 | 10  | 30.0  | 100.0 |
| <i>Stachyurus</i>      | 3 | 10  | 30.0  | 50.0  |
| <i>Tupistra</i>        | 3 | 14  | 28.6  | 42.9  |
| <i>Jacquemontia</i>    | 3 | 8   | 37.5  | 75.0  |
| <i>Melastoma</i>       | 3 | 10  | 80.0  | 100.0 |
| <i>Prosthechea</i>     | 3 | 7   | 100.0 | 100.0 |
| <i>Cischweinfia</i>    | 3 | 6   | 33.3  | 33.3  |
| <i>Cuitlauzina</i>     | 3 | 6   | 100.0 | 100.0 |
| <i>Ornithocephalus</i> | 3 | 7   | 100.0 | 100.0 |
| <i>Trichocentrum</i>   | 3 | 6   | 33.3  | 33.3  |
| <i>Trichopilia</i>     | 3 | 10  | 100.0 | 100.0 |
| <i>Lepismium</i>       | 3 | 8   | 100.0 | 100.0 |
| <i>Ionopsis</i>        | 3 | 7   | 100.0 | 100.0 |

|                       |   |    |       |       |
|-----------------------|---|----|-------|-------|
| <i>Rhynchostele</i>   | 3 | 9  | 100.0 | 100.0 |
| <i>Pyrrosia</i>       | 3 | 9  | 66.7  | 66.7  |
| <i>Caucaea</i>        | 3 | 6  | 33.3  | 50.0  |
| <i>Syzygium</i>       | 3 | 9  | 77.8  | 100.0 |
| <i>Aronia</i>         | 3 | 6  | 0.0   | 16.7  |
| <i>Hoodia</i>         | 3 | 12 | 0.0   | 0.0   |
| <i>Carapa</i>         | 3 | 18 | 100.0 | 100.0 |
| <i>Rhynchosytilis</i> | 3 | 15 | 100.0 | 100.0 |
| <i>Palaua</i>         | 3 | 7  | 14.3  | 100.0 |
| <i>Searsia</i>        | 3 | 9  | 0.0   | 100.0 |
| <i>Amelichloa</i>     | 3 | 17 | 0.0   | 0.0   |
| <i>Niphotrichum</i>   | 3 | 14 | 85.7  | 85.7  |
| <i>Talipariti</i>     | 3 | 25 | 8.0   | 8.0   |
| <i>Podocarpus</i>     | 2 | 13 | 100.0 | 100.0 |
| <i>Papaver</i>        | 2 | 5  | 100.0 | 100.0 |
| <i>Cerastium</i>      | 2 | 4  | 100.0 | 100.0 |
| <i>Rhamnus</i>        | 2 | 7  | 100.0 | 100.0 |
| <i>Brassica</i>       | 2 | 5  | 100.0 | 100.0 |
| <i>Raphanus</i>       | 2 | 9  | 44.4  | 44.4  |
| <i>Trifolium</i>      | 2 | 8  | 100.0 | 100.0 |
| <i>Hyoscyamus</i>     | 2 | 4  | 25.0  | 25.0  |
| <i>Leonurus</i>       | 2 | 6  | 100.0 | 100.0 |
| <i>Ambrosia</i>       | 2 | 8  | 12.5  | 12.5  |
| <i>Arctium</i>        | 2 | 6  | 33.3  | 33.3  |
| <i>Helianthus</i>     | 2 | 5  | 100.0 | 100.0 |
| <i>Euonymus</i>       | 2 | 29 | 100.0 | 100.0 |
| <i>Alocasia</i>       | 2 | 7  | 71.4  | 85.7  |
| <i>Colocasia</i>      | 2 | 4  | 100.0 | 100.0 |
| <i>Spirodela</i>      | 2 | 10 | 100.0 | 100.0 |
| <i>Oryza</i>          | 2 | 8  | 62.5  | 62.5  |
| <i>Panicum</i>        | 2 | 4  | 75.0  | 75.0  |
| <i>Setaria</i>        | 2 | 4  | 100.0 | 100.0 |
| <i>Thinopyrum</i>     | 2 | 37 | 8.1   | 100.0 |
| <i>Heliconia</i>      | 2 | 4  | 100.0 | 100.0 |
| <i>Lilium</i>         | 2 | 28 | 100.0 | 100.0 |
| <i>Pandanus</i>       | 2 | 5  | 100.0 | 100.0 |
| <i>Typha</i>          | 2 | 6  | 50.0  | 50.0  |
| <i>Epilobium</i>      | 2 | 4  | 100.0 | 100.0 |
| <i>Halodule</i>       | 2 | 13 | 100.0 | 100.0 |
| <i>Sabal</i>          | 2 | 4  | 75.0  | 75.0  |
| <i>Ardisia</i>        | 2 | 5  | 100.0 | 100.0 |
| <i>Enkianthus</i>     | 2 | 8  | 100.0 | 100.0 |
| <i>Juncus</i>         | 2 | 5  | 100.0 | 100.0 |
| <i>Styrax</i>         | 2 | 5  | 100.0 | 100.0 |
| <i>Sphagnum</i>       | 2 | 4  | 100.0 | 100.0 |
| <i>Cymbidium</i>      | 2 | 4  | 100.0 | 100.0 |
| <i>Alisma</i>         | 2 | 12 | 8.3   | 8.3   |
| <i>Agrostis</i>       | 2 | 5  | 20.0  | 20.0  |
| <i>Dendrocalamus</i>  | 2 | 5  | 100.0 | 100.0 |
| <i>Stipa</i>          | 2 | 8  | 100.0 | 100.0 |
| <i>Asclepias</i>      | 2 | 6  | 33.3  | 33.3  |
| <i>Glechoma</i>       | 2 | 6  | 100.0 | 100.0 |
| <i>Verbena</i>        | 2 | 4  | 100.0 | 100.0 |

|                        |   |     |       |       |
|------------------------|---|-----|-------|-------|
| <i>Mandragora</i>      | 2 | 7   | 100.0 | 100.0 |
| <i>Galium</i>          | 2 | 5   | 40.0  | 60.0  |
| <i>Elaeocarpus</i>     | 2 | 4   | 100.0 | 100.0 |
| <i>Odontosoria</i>     | 2 | 4   | 50.0  | 50.0  |
| <i>Nephrolepis</i>     | 2 | 4   | 50.0  | 50.0  |
| <i>Impatiens</i>       | 2 | 4   | 100.0 | 100.0 |
| <i>Santalum</i>        | 2 | 8   | 100.0 | 100.0 |
| <i>Urochloa</i>        | 2 | 5   | 100.0 | 100.0 |
| <i>Pseudoroegneria</i> | 2 | 4   | 0.0   | 25.0  |
| <i>Encyclia</i>        | 2 | 6   | 100.0 | 100.0 |
| <i>Ajuga</i>           | 2 | 6   | 100.0 | 100.0 |
| <i>Sporobolus</i>      | 2 | 4   | 100.0 | 100.0 |
| <i>Ocimum</i>          | 2 | 17  | 35.3  | 52.9  |
| <i>Rosmarinus</i>      | 2 | 8   | 25.0  | 25.0  |
| <i>Leea</i>            | 2 | 5   | 100.0 | 100.0 |
| <i>Doniophyton</i>     | 2 | 4   | 100.0 | 100.0 |
| <i>Saussurea</i>       | 2 | 4   | 100.0 | 100.0 |
| <i>Eryngium</i>        | 2 | 13  | 100.0 | 100.0 |
| <i>Luculia</i>         | 2 | 10  | 0.0   | 0.0   |
| <i>Trichilia</i>       | 2 | 7   | 100.0 | 100.0 |
| <i>Cipadessa</i>       | 2 | 7   | 0.0   | 57.1  |
| <i>Glycyrrhiza</i>     | 2 | 7   | 85.7  | 85.7  |
| <i>Schizolobium</i>    | 2 | 12  | 66.7  | 100.0 |
| <i>Pulsatilla</i>      | 2 | 12  | 8.3   | 58.3  |
| <i>Andira</i>          | 2 | 6   | 100.0 | 100.0 |
| <i>Hippophae</i>       | 2 | 10  | 100.0 | 100.0 |
| <i>Hohenbergia</i>     | 2 | 4   | 25.0  | 100.0 |
| <i>Pitcairnia</i>      | 2 | 4   | 50.0  | 100.0 |
| <i>Taraxacum</i>       | 2 | 7   | 100.0 | 100.0 |
| <i>Piptatherum</i>     | 2 | 5   | 60.0  | 100.0 |
| <i>Alstonia</i>        | 2 | 6   | 50.0  | 100.0 |
| <i>Chamaecrista</i>    | 2 | 4   | 25.0  | 100.0 |
| <i>Hypericum</i>       | 2 | 5   | 100.0 | 100.0 |
| <i>Sanguisorba</i>     | 2 | 6   | 100.0 | 100.0 |
| <i>Lloydia</i>         | 2 | 5   | 100.0 | 100.0 |
| <i>Craspedia</i>       | 2 | 4   | 0.0   | 0.0   |
| <i>Raoulia</i>         | 2 | 6   | 0.0   | 66.7  |
| <i>Schizophragma</i>   | 2 | 4   | 100.0 | 100.0 |
| <i>Loropetalum</i>     | 2 | 36  | 100.0 | 100.0 |
| <i>Larrea</i>          | 2 | 109 | 100.0 | 100.0 |
| <i>Pauridia</i>        | 2 | 123 | 0.0   | 46.3  |
| <i>Aspalathus</i>      | 2 | 4   | 100.0 | 100.0 |
| <i>Helixanthera</i>    | 2 | 7   | 100.0 | 100.0 |
| <i>Cordia</i>          | 2 | 48  | 100.0 | 100.0 |
| <i>Couepia</i>         | 2 | 4   | 100.0 | 100.0 |
| <i>Aspidosperma</i>    | 2 | 4   | 100.0 | 100.0 |
| <i>Stemona</i>         | 2 | 5   | 100.0 | 100.0 |
| <i>Draba</i>           | 2 | 6   | 100.0 | 100.0 |
| <i>Malope</i>          | 2 | 6   | 100.0 | 100.0 |
| <i>Anthemis</i>        | 2 | 4   | 100.0 | 100.0 |
| <i>Mikania</i>         | 2 | 10  | 0.0   | 0.0   |
| <i>Gigantochloa</i>    | 2 | 8   | 37.5  | 37.5  |
| <i>Gagnepainia</i>     | 2 | 6   | 100.0 | 100.0 |



|                          |   |     |       |       |
|--------------------------|---|-----|-------|-------|
| <i>Casearia</i>          | 2 | 4   | 100.0 | 100.0 |
| <i>Hyphaene</i>          | 2 | 6   | 100.0 | 100.0 |
| <i>Wallichia</i>         | 2 | 5   | 40.0  | 100.0 |
| <i>Psidium</i>           | 2 | 4   | 100.0 | 100.0 |
| <i>Ampelocissus</i>      | 2 | 4   | 100.0 | 100.0 |
| <i>Fernandezia</i>       | 2 | 4   | 100.0 | 100.0 |
| <i>Lockhartia</i>        | 2 | 4   | 100.0 | 100.0 |
| <i>Picconia</i>          | 2 | 9   | 100.0 | 100.0 |
| <i>Mammillaria</i>       | 2 | 4   | 100.0 | 100.0 |
| <i>Bistorta</i>          | 2 | 12  | 16.7  | 41.7  |
| <i>Oxyria</i>            | 2 | 56  | 96.4  | 100.0 |
| <i>Calliandra</i>        | 2 | 4   | 100.0 | 100.0 |
| <i>Milioniopsis</i>      | 2 | 4   | 0.0   | 0.0   |
| <i>Odontoglossum</i>     | 2 | 4   | 100.0 | 100.0 |
| <i>Eperua</i>            | 2 | 8   | 100.0 | 100.0 |
| <i>Galinsoga</i>         | 2 | 5   | 0.0   | 20.0  |
| <i>Paepalanthus</i>      | 2 | 6   | 100.0 | 100.0 |
| <i>Enceliopsis</i>       | 2 | 4   | 100.0 | 100.0 |
| <i>Brosimum</i>          | 2 | 212 | 43.4  | 100.0 |
| <i>Faurea</i>            | 2 | 6   | 0.0   | 0.0   |
| <i>Macrosolen</i>        | 2 | 6   | 100.0 | 100.0 |
| <i>Scurrula</i>          | 2 | 5   | 100.0 | 100.0 |
| <i>Chamerion</i>         | 2 | 7   | 100.0 | 100.0 |
| <i>Cristaria</i>         | 2 | 4   | 100.0 | 100.0 |
| <i>Miconia</i>           | 2 | 5   | 100.0 | 100.0 |
| <i>Cota</i>              | 2 | 6   | 100.0 | 100.0 |
| <i>Phlomis</i>           | 2 | 27  | 100.0 | 100.0 |
| <i>Elephantopus</i>      | 2 | 9   | 100.0 | 100.0 |
| <i>Glossoloma</i>        | 2 | 4   | 100.0 | 100.0 |
| <i>Jacobaea</i>          | 2 | 4   | 100.0 | 100.0 |
| <i>Leochilus</i>         | 2 | 4   | 100.0 | 100.0 |
| <i>Tripogon</i>          | 2 | 10  | 0.0   | 0.0   |
| <i>Polyphlebium</i>      | 2 | 7   | 100.0 | 100.0 |
| <i>Mariosousa</i>        | 2 | 4   | 0.0   | 100.0 |
| <i>Vachellia</i>         | 2 | 17  | 88.2  | 100.0 |
| <i>Pugionium</i>         | 2 | 10  | 0.0   | 0.0   |
| <i>Grandiphyllum</i>     | 2 | 4   | 100.0 | 100.0 |
| <i>Dasiphora</i>         | 2 | 14  | 64.3  | 78.6  |
| <i>Bucklandiella</i>     | 2 | 6   | 100.0 | 100.0 |
| <i>Codriophorus</i>      | 2 | 12  | 100.0 | 100.0 |
| <i>Chaetoseris</i>       | 2 | 4   | 100.0 | 100.0 |
| <i>Razafimandibsonia</i> | 2 | 6   | 66.7  | 66.7  |
| <i>Nyholmiella</i>       | 2 | 8   | 25.0  | 25.0  |
| <i>Paraholcoglossum</i>  | 2 | 9   | 100.0 | 100.0 |
| <i>Tsiorchis</i>         | 2 | 9   | 100.0 | 100.0 |
