# Supplementary material for: Utility of the trnH–psbA Intergenic Spacer Region and Its Combinations as Plant DNA Barcodes: A Meta-Analysis
Source: PubMed Central journal article supplement (PMC3498263; doi:10.1371/journal.pone.0048833), 2012-11-14
Supplement: pone.0048833.s012.pdf [file pone.0048833.s012.pdf]

**Table S12.** Detailed information on the identification success rate of single markers at the family level and the corresponding statistical test results.

| Family          | N   | ITS2 and <i>trnH-psbA</i> |                              |        |                         | <i>matK</i> and <i>trnH-psbA</i> |                              |        |                                | <i>rbcL</i> and <i>trnH-psbA</i> |                              |        |                                |
|-----------------|-----|---------------------------|------------------------------|--------|-------------------------|----------------------------------|------------------------------|--------|--------------------------------|----------------------------------|------------------------------|--------|--------------------------------|
|                 |     | ITS2 success (%)          | <i>trnH-psbA</i> success (%) | 2-Tail | Result                  | <i>matK</i> success (%)          | <i>trnH-psbA</i> success (%) | 2-Tail | Result                         | <i>rbcL</i> success (%)          | <i>trnH-psbA</i> success (%) | 2-Tail | Result                         |
| Ranunculaceae   | 34  | 44.1                      | 47.1                         | 1      | N/S                     | 23.5                             | 47.1                         | 0.0746 | N/S                            | 11.8                             | 47.1                         | 0.0029 | <i>trnH-psbA</i> > <i>rbcL</i> |
| Moraceae        | 9   | 100.0                     | 100.0                        | N/A    | N/A                     | 100.0                            | 100.0                        | N/A    | N/A                            | 22.2                             | 100.0                        | 0.0023 | <i>trnH-psbA</i> > <i>rbcL</i> |
| Betulaceae      | 20  | 50.0                      | 65.0                         | 0.5231 | N/S                     | 0.0                              | 65.0                         | <.0001 | <i>trnH-psbA</i> > <i>matK</i> | 10.0                             | 65.0                         | 0.0008 | <i>trnH-psbA</i> > <i>rbcL</i> |
| Amaranthaceae   | 53  | 77.4                      | 64.2                         | 0.1998 | N/S                     | 75.5                             | 64.2                         | 0.2901 | N/S                            | 52.8                             | 64.2                         | 0.3244 | N/S                            |
| Caryophyllaceae | 19  | 89.5                      | 100.0                        | 0.4865 | N/S                     | 89.5                             | 100.0                        | 0.4865 | N/S                            | 52.6                             | 100.0                        | 0.0011 | <i>trnH-psbA</i> > <i>rbcL</i> |
| Polygonaceae    | 23  | 95.7                      | 73.9                         | 0.0959 | N/S                     | 69.6                             | 73.9                         | 1      | N/S                            | 73.9                             | 73.9                         | 1      | N/S                            |
| Cucurbitaceae   | 175 | 33.7                      | 84.0                         | <.0001 | <i>trnH-psbA</i> > ITS2 | 62.9                             | 84.0                         | <.0001 | <i>trnH-psbA</i> > <i>matK</i> | 14.3                             | 84.0                         | <.0001 | <i>trnH-psbA</i> > <i>rbcL</i> |
| Begoniaceae     | 46  | 100.0                     | 23.9                         | <.0001 | <i>trnH-psbA</i> < ITS2 | 21.7                             | 23.9                         | 1      | N/S                            | 30.4                             | 23.9                         | 0.6398 | N/S                            |
| Brassicaceae    | 46  | 43.5                      | 52.2                         | 0.5315 | N/S                     | 39.1                             | 52.2                         | 0.2953 | N/S                            | 34.8                             | 52.2                         | 0.1406 | N/S                            |
| Rosaceae        | 17  | 100.0                     | 64.7                         | 0.0184 | <i>trnH-psbA</i> < ITS2 | 100.0                            | 64.7                         | 0.0184 | <i>trnH-psbA</i> < <i>matK</i> | 41.2                             | 64.7                         | 0.3028 | N/S                            |
| Crassulaceae    | 6   | 100.0                     | 100.0                        | N/A    | N/A                     | 100.0                            | 100.0                        | N/A    | N/A                            | 66.7                             | 100.0                        | 0.4545 | N/S                            |
| Apiaceae        | 56  | 92.9                      | 67.9                         | 0.0015 | <i>trnH-psbA</i> < ITS2 | 76.8                             | 67.9                         | 0.3985 | N/S                            | 58.9                             | 67.9                         | 0.4329 | N/S                            |
| Araliaceae      | 4   | 100.0                     | 25.0                         | 0.1429 | N/S                     | 25.0                             | 25.0                         | 1      | N/S                            | 100.0                            | 25.0                         | 0.1429 | N/S                            |
| Solanaceae      | 25  | 100.0                     | 100.0                        | N/A    | N/A                     | 100.0                            | 100.0                        | N/A    | N/A                            | 72.0                             | 100.0                        | 0.0096 | <i>trnH-psbA</i> > <i>rbcL</i> |
| Oleaceae        | 58  | 82.8                      | 81.0                         | 1      | N/S                     | 53.4                             | 81.0                         | 0.0028 | <i>trnH-psbA</i> > <i>matK</i> | 46.6                             | 81.0                         | 0.0002 | <i>trnH-psbA</i> > <i>rbcL</i> |
| Caprifoliaceae  | 7   | 100.0                     | 100.0                        | N/A    | N/A                     | 100.0                            | 100.0                        | N/A    | N/A                            | 100.0                            | 100.0                        | N/A    | N/A                            |
| Adoxaceae       | 46  | 82.6                      | 80.4                         | 1      | N/S                     | 45.7                             | 80.4                         | 0.001  | <i>trnH-psbA</i> > <i>matK</i> | 6.5                              | 80.4                         | <.0001 | <i>trnH-psbA</i> > <i>rbcL</i> |
| Asteraceae      | 100 | 92.0                      | 53.0                         | <.0001 | <i>trnH-psbA</i> < ITS2 | 48.0                             | 53.0                         | 0.5717 | N/S                            | 18.0                             | 53.0                         | <.0001 | <i>trnH-psbA</i> > <i>rbcL</i> |
| Aquifoliaceae   | 11  | 27.3                      | 100.0                        | 0.001  | <i>trnH-psbA</i> > ITS2 | 100.0                            | 100.0                        | N/A    | N/A                            | 100.0                            | 100.0                        | N/A    | N/A                            |
| Celastraceae    | 160 | 88.1                      | 87.5                         | 1      | N/S                     | 58.8                             | 87.5                         | <.0001 | <i>trnH-psbA</i> > <i>matK</i> | 42.5                             | 87.5                         | <.0001 | <i>trnH-psbA</i> > <i>rbcL</i> |
| Primulaceae     | 134 | 97.0                      | 88.8                         | 0.0153 | <i>trnH-psbA</i> < ITS2 | 83.6                             | 88.8                         | 0.288  | N/S                            | 67.9                             | 88.8                         | <.0001 | <i>trnH-psbA</i> > <i>rbcL</i> |
| Ericaceae       | 341 | 29.6                      | 41.9                         | 0.001  | <i>trnH-psbA</i> > ITS2 | 43.1                             | 41.9                         | 0.8163 | N/S                            | 20.8                             | 41.9                         | <.0001 | <i>trnH-psbA</i> > <i>rbcL</i> |
| Campanulaceae   | 24  | 91.7                      | 75.0                         | 0.2448 | N/S                     | 58.3                             | 75.0                         | 0.3587 | N/S                            | 54.2                             | 75.0                         | 0.227  | N/S                            |

|                 |     |       |       |        |                         |       |       |        |                                |       |       |        |                                |
|-----------------|-----|-------|-------|--------|-------------------------|-------|-------|--------|--------------------------------|-------|-------|--------|--------------------------------|
| Alismataceae    | 5   | 100.0 | 0.0   | 0.0079 | <i>trnH-psbA</i> < ITS2 | 0.0   | 0.0   | N/A    | N/A                            | 0.0   | 0.0   | N/A    | N/A                            |
| Araceae         | 4   | 100.0 | 100.0 | N/A    | N/A                     | 100.0 | 100.0 | N/A    | N/A                            | 100.0 | 100.0 | N/A    | N/A                            |
| Poaceae         | 48  | 62.5  | 39.6  | 0.0406 | <i>trnH-psbA</i> < ITS2 | 25.0  | 39.6  | 0.1899 | N/S                            | 31.3  | 39.6  | 0.5224 | N/S                            |
| Zingiberaceae   | 8   | 100.0 | 100.0 | N/A    | N/A                     | 100.0 | 100.0 | N/A    | N/A                            | 100.0 | 100.0 | N/A    | N/A                            |
| Amaryllidaceae  | 59  | 79.7  | 64.4  | 0.1    | N/S                     | 55.9  | 64.4  | 0.4521 | N/S                            | 64.4  | 64.4  | 1      | N/S                            |
| Dioscoreaceae   | 39  | 87.2  | 82.1  | 0.7549 | N/S                     | 56.4  | 82.1  | 0.0262 | <i>trnH-psbA</i> > <i>matK</i> | 28.2  | 82.1  | <.0001 | <i>trnH-psbA</i> > <i>rbcl</i> |
| Smilacaceae     | 4   | 100.0 | 100.0 | N/A    | N/A                     | 100.0 | 100.0 | N/A    | N/A                            | 100.0 | 100.0 | N/A    | N/A                            |
| Gentianaceae    | 8   | 37.5  | 50.0  | 1      | N/S                     | 100.0 | 50.0  | 0.0769 | N/S                            | 25.0  | 50.0  | 0.6084 | N/S                            |
| Grossulariaceae | 7   | 100.0 | 100.0 | N/A    | N/A                     | 100.0 | 100.0 | N/A    | N/A                            | 100.0 | 100.0 | N/A    | N/A                            |
| Hydrangeaceae   | 7   | 42.9  | 57.1  | 1      | N/S                     | 85.7  | 57.1  | 0.5594 | N/S                            | 42.9  | 57.1  | 1      | N/S                            |
| Rubiaceae       | 92  | 69.6  | 68.5  | 1      | N/S                     | 59.8  | 68.5  | 0.2819 | N/S                            | 33.7  | 68.5  | <.0001 | <i>trnH-psbA</i> > <i>rbcl</i> |
| Taxaceae        | 13  | 100.0 | 46.2  | 0.0052 | <i>trnH-psbA</i> < ITS2 | 38.5  | 46.2  | 1      | N/S                            | 23.1  | 46.2  | 0.411  | N/S                            |
| Elaeagnaceae    | 10  | 100.0 | 100.0 | N/A    | N/A                     | 100.0 | 100.0 | N/A    | N/A                            | 100.0 | 100.0 | N/A    | N/A                            |
| Asparagaceae    | 38  | 89.5  | 60.5  | 0.0071 | <i>trnH-psbA</i> < ITS2 | 86.8  | 60.5  | 0.0178 | <i>trnH-psbA</i> < <i>matK</i> | 55.3  | 60.5  | 0.8165 | N/S                            |
| Cornaceae       | 6   | 100.0 | 16.7  | 0.0152 | <i>trnH-psbA</i> < ITS2 | 33.3  | 16.7  | 1      | N/S                            | 33.3  | 16.7  | 1      | N/S                            |
| Meliaceae       | 7   | 71.4  | 57.1  | 1      | N/S                     | 42.9  | 57.1  | 1      | N/S                            | 14.3  | 57.1  | 0.2657 | N/S                            |
| Zygophyllaceae  | 10  | 50.0  | 60.0  | 1      | N/S                     | 30.0  | 60.0  | 0.3698 | N/S                            | 20.0  | 60.0  | 0.1698 | N/S                            |
| Cephalotaxaceae | 29  | 34.5  | 13.8  | 0.1233 | N/S                     | 100.0 | 13.8  | <.0001 | <i>trnH-psbA</i> < <i>matK</i> | 6.9   | 13.8  | 0.6701 | N/S                            |
| Melanthiaceae   | 40  | 82.5  | 50.0  | 0.0041 | <i>trnH-psbA</i> < ITS2 | 30.0  | 50.0  | 0.1095 | N/S                            | 37.5  | 50.0  | 0.3675 | N/S                            |
| Stachyuraceae   | 5   | 100.0 | 60.0  | 0.4444 | N/S                     | 0.0   | 60.0  | 0.1667 | N/S                            | 40.0  | 60.0  | 1      | N/S                            |
| Nitrariaceae    | 5   | 0.0   | 100.0 | 0.0079 | <i>trnH-psbA</i> > ITS2 | 20.0  | 100.0 | 0.0476 | <i>trnH-psbA</i> > <i>matK</i> | 0.0   | 100.0 | 0.0079 | <i>trnH-psbA</i> > <i>rbcl</i> |
| Orobanchaceae   | 315 | 86.7  | 85.7  | 0.8175 | N/S                     | 75.2  | 85.7  | 0.0012 | <i>trnH-psbA</i> > <i>matK</i> | 50.5  | 85.7  | <.0001 | <i>trnH-psbA</i> > <i>rbcl</i> |
| Hypericaceae    | 5   | 100.0 | 100.0 | N/A    | N/A                     | 100.0 | 100.0 | N/A    | N/A                            | 100.0 | 100.0 | N/A    | N/A                            |
| Aceraceae       | 12  | 100.0 | 100.0 | N/A    | N/A                     | 100.0 | 100.0 | N/A    | N/A                            | 75.0  | 100.0 | 0.2174 | N/S                            |

N/A: Not Applicable, N/S: Not Significant.
