# Supplementary material for: Utility of the trnH–psbA Intergenic Spacer Region and Its Combinations as Plant DNA Barcodes: A Meta-Analysis
Source: PubMed Central journal article supplement (PMC3498263; doi:10.1371/journal.pone.0048833), 2012-11-14
Supplement: pone.0048833.s013.pdf [file pone.0048833.s013.pdf]

**Table S13.** Detailed information on the identification success rate of single markers at the genus level and the corresponding statistical test results.

| Genus        | N   | ITS2 and <i>trnH-psbA</i> |                              |        |                         | <i>matK</i> and <i>trnH-psbA</i> |                              |        |                                | <i>rbcL</i> and <i>trnH-psbA</i> |                              |        |                                |
|--------------|-----|---------------------------|------------------------------|--------|-------------------------|----------------------------------|------------------------------|--------|--------------------------------|----------------------------------|------------------------------|--------|--------------------------------|
|              |     | ITS2 success (%)          | <i>trnH-psbA</i> success (%) | 2-Tail | Result                  | <i>matK</i> success (%)          | <i>trnH-psbA</i> success (%) | 2-Tail | Result                         | <i>rbcL</i> success (%)          | <i>trnH-psbA</i> success (%) | 2-Tail | Result                         |
| Ficus        | 9   | 100.0                     | 100.0                        | N/A    | N/A                     | 100.0                            | 100.0                        | N/A    | N/A                            | 22.2                             | 100.0                        | 0.0023 | <i>trnH-psbA</i> > <i>rbcL</i> |
| Chenopodium  | 24  | 100.0                     | 100.0                        | N/A    | N/A                     | 100.0                            | 100.0                        | N/A    | N/A                            | 100.0                            | 100.0                        | N/A    | N/A                            |
| Amaranthus   | 24  | 50.0                      | 20.8                         | 0.0687 | N/S                     | 45.8                             | 20.8                         | 0.1246 | N/S                            | 0.0                              | 20.8                         | 0.0496 | <i>trnH-psbA</i> > <i>rbcL</i> |
| Silene       | 19  | 89.5                      | 100.0                        | 0.4865 | N/S                     | 89.5                             | 100.0                        | 0.4865 | N/S                            | 52.6                             | 100.0                        | 0.0011 | <i>trnH-psbA</i> > <i>rbcL</i> |
| Rheum        | 6   | 100.0                     | 100.0                        | N/A    | N/A                     | 100.0                            | 100.0                        | N/A    | N/A                            | 100.0                            | 100.0                        | N/A    | N/A                            |
| Begonia      | 46  | 100.0                     | 23.9                         | <.0001 | <i>trnH-psbA</i> < ITS2 | 21.7                             | 23.9                         | 1      | N/S                            | 30.4                             | 23.9                         | 0.6398 | N/S                            |
| Prunus       | 17  | 100.0                     | 64.7                         | 0.0184 | <i>trnH-psbA</i> < ITS2 | 100.0                            | 64.7                         | 0.0184 | <i>trnH-psbA</i> < <i>matK</i> | 41.2                             | 64.7                         | 0.3028 | N/S                            |
| Parnassia    | 160 | 88.1                      | 87.5                         | 1      | N/S                     | 58.8                             | 87.5                         | <.0001 | <i>trnH-psbA</i> > <i>matK</i> | 42.5                             | 87.5                         | <.0001 | <i>trnH-psbA</i> > <i>rbcL</i> |
| Ribes        | 7   | 100.0                     | 100.0                        | N/A    | N/A                     | 100.0                            | 100.0                        | N/A    | N/A                            | 100.0                            | 100.0                        | N/A    | N/A                            |
| Acer         | 12  | 100.0                     | 100.0                        | N/A    | N/A                     | 100.0                            | 100.0                        | N/A    | N/A                            | 75.0                             | 100.0                        | 0.2174 | N/S                            |
| Panax        | 4   | 100.0                     | 25.0                         | 0.1429 | N/S                     | 25.0                             | 25.0                         | 1      | N/S                            | 100.0                            | 25.0                         | 0.1429 | N/S                            |
| Datura       | 14  | 100.0                     | 100.0                        | N/A    | N/A                     | 100.0                            | 100.0                        | N/A    | N/A                            | 50.0                             | 100.0                        | 0.0058 | <i>trnH-psbA</i> > <i>rbcL</i> |
| Solanum      | 11  | 100.0                     | 100.0                        | N/A    | N/A                     | 100.0                            | 100.0                        | N/A    | N/A                            | 100.0                            | 100.0                        | N/A    | N/A                            |
| Sambucus     | 22  | 81.8                      | 95.5                         | 0.3449 | N/S                     | 50.0                             | 95.5                         | 0.0015 | <i>trnH-psbA</i> > <i>matK</i> | 0.0                              | 95.5                         | <.0001 | <i>trnH-psbA</i> > <i>rbcL</i> |
| Viburnum     | 24  | 83.3                      | 66.7                         | 0.3177 | N/S                     | 41.7                             | 66.7                         | 0.1468 | N/S                            | 12.5                             | 66.7                         | 0.0003 | <i>trnH-psbA</i> > <i>rbcL</i> |
| Ligularia    | 26  | 100.0                     | 30.8                         | <.0001 | <i>trnH-psbA</i> < ITS2 | 42.3                             | 30.8                         | 0.5653 | N/S                            | 19.2                             | 30.8                         | 0.523  | N/S                            |
| Nyssa        | 6   | 100.0                     | 16.7                         | 0.0152 | <i>trnH-psbA</i> < ITS2 | 33.3                             | 16.7                         | 1      | N/S                            | 33.3                             | 16.7                         | 1      | N/S                            |
| Ilex         | 11  | 27.3                      | 100.0                        | 0.001  | <i>trnH-psbA</i> > ITS2 | 100.0                            | 100.0                        | N/A    | N/A                            | 100.0                            | 100.0                        | N/A    | N/A                            |
| Rhododendron | 211 | 24.2                      | 47.4                         | <.0001 | <i>trnH-psbA</i> > ITS2 | 36.0                             | 47.4                         | 0.023  | <i>trnH-psbA</i> > <i>matK</i> | 20.4                             | 47.4                         | <.0001 | <i>trnH-psbA</i> > <i>rbcL</i> |
| Allium       | 59  | 79.7                      | 64.4                         | 0.1    | N/S                     | 55.9                             | 64.4                         | 0.4521 | N/S                            | 64.4                             | 64.4                         | 1      | N/S                            |
| Cassiope     | 12  | 33.3                      | 41.7                         | 1      | N/S                     | 50.0                             | 41.7                         | 1      | N/S                            | 50.0                             | 41.7                         | 1      | N/S                            |
| Gaultheria   | 118 | 39.0                      | 32.2                         | 0.3413 | N/S                     | 55.1                             | 32.2                         | 0.0006 | <i>trnH-psbA</i> < <i>matK</i> | 18.6                             | 32.2                         | 0.0245 | <i>trnH-psbA</i> > <i>rbcL</i> |
| Ligustrum    | 58  | 82.8                      | 81.0                         | 1      | N/S                     | 53.4                             | 81.0                         | 0.0028 | <i>trnH-psbA</i> > <i>matK</i> | 46.6                             | 81.0                         | 0.0002 | <i>trnH-psbA</i> > <i>rbcL</i> |

|               |     |       |       |        |                         |       |       |        |                                |       |       |        |                                |
|---------------|-----|-------|-------|--------|-------------------------|-------|-------|--------|--------------------------------|-------|-------|--------|--------------------------------|
| Alisma        | 5   | 100.0 | 0.0   | 0.0079 | <i>trnH-psbA</i> < ITS2 | 0.0   | 0.0   | N/A    | N/A                            | 0.0   | 0.0   | N/A    | N/A                            |
| Maianthemum   | 29  | 86.2  | 48.3  | 0.0045 | <i>trnH-psbA</i> < ITS2 | 82.8  | 48.3  | 0.0119 | <i>trnH-psbA</i> < <i>matK</i> | 41.4  | 48.3  | 0.7921 | N/S                            |
| Cyananthus    | 24  | 91.7  | 75.0  | 0.2448 | N/S                     | 58.3  | 75.0  | 0.3587 | N/S                            | 54.2  | 75.0  | 0.227  | N/S                            |
| Lepidium      | 21  | 33.3  | 42.9  | 0.7513 | N/S                     | 23.8  | 42.9  | 0.3264 | N/S                            | 23.8  | 42.9  | 0.3264 | N/S                            |
| Gentiana      | 8   | 37.5  | 50.0  | 1      | N/S                     | 100.0 | 50.0  | 0.0769 | N/S                            | 25.0  | 50.0  | 0.6084 | N/S                            |
| Hydrangea     | 7   | 42.9  | 57.1  | 1      | N/S                     | 85.7  | 57.1  | 0.5594 | N/S                            | 42.9  | 57.1  | 1      | N/S                            |
| Amentotaxus   | 13  | 100.0 | 46.2  | 0.0052 | <i>trnH-psbA</i> < ITS2 | 38.5  | 46.2  | 1      | N/S                            | 23.1  | 46.2  | 0.411  | N/S                            |
| Pedicularis   | 298 | 87.9  | 89.6  | 0.6042 | N/S                     | 77.2  | 89.6  | <.0001 | <i>trnH-psbA</i> > <i>matK</i> | 53.4  | 89.6  | <.0001 | <i>trnH-psbA</i> > <i>rbcL</i> |
| Luculia       | 10  | 20.0  | 0.0   | 0.4737 | N/S                     | 0.0   | 0.0   | N/A    | N/A                            | 0.0   | 0.0   | N/A    | N/A                            |
| Morinda       | 13  | 61.5  | 15.4  | 0.0414 | <i>trnH-psbA</i> < ITS2 | 46.2  | 15.4  | 0.2016 | N/S                            | 7.7   | 15.4  | 1      | N/S                            |
| Mussaenda     | 21  | 28.6  | 81.0  | 0.0016 | <i>trnH-psbA</i> > ITS2 | 57.1  | 81.0  | 0.1809 | N/S                            | 14.3  | 81.0  | <.0001 | <i>trnH-psbA</i> > <i>rbcL</i> |
| Oldenlandia   | 13  | 100.0 | 76.9  | 0.22   | N/S                     | 100.0 | 76.9  | 0.22   | N/S                            | 69.2  | 76.9  | 1      | N/S                            |
| Nitraria      | 5   | 0.0   | 100.0 | 0.0079 | <i>trnH-psbA</i> > ITS2 | 20.0  | 100.0 | 0.0476 | <i>trnH-psbA</i> > <i>matK</i> | 0.0   | 100.0 | 0.0079 | <i>trnH-psbA</i> > <i>rbcL</i> |
| Cipadessa     | 7   | 71.4  | 57.1  | 1      | N/S                     | 42.9  | 57.1  | 1      | N/S                            | 14.3  | 57.1  | 0.2657 | N/S                            |
| Tacca         | 39  | 87.2  | 82.1  | 0.7549 | N/S                     | 56.4  | 82.1  | 0.0262 | <i>trnH-psbA</i> > <i>matK</i> | 28.2  | 82.1  | <.0001 | <i>trnH-psbA</i> > <i>rbcL</i> |
| Suaeda        | 5   | 100.0 | 100.0 | N/A    | N/A                     | 100.0 | 100.0 | N/A    | N/A                            | 80.0  | 100.0 | 1      | N/S                            |
| Hippophae     | 10  | 100.0 | 100.0 | N/A    | N/A                     | 100.0 | 100.0 | N/A    | N/A                            | 100.0 | 100.0 | N/A    | N/A                            |
| Aconitum      | 34  | 44.1  | 47.1  | 1      | N/S                     | 23.5  | 47.1  | 0.0746 | N/S                            | 11.8  | 47.1  | 0.0029 | <i>trnH-psbA</i> > <i>rbcL</i> |
| Osmorhiza     | 26  | 100.0 | 46.2  | <.0001 | <i>trnH-psbA</i> < ITS2 | 65.4  | 46.2  | 0.264  | N/S                            | 42.3  | 46.2  | 1      | N/S                            |
| Peucedanum    | 19  | 78.9  | 78.9  | 1      | N/S                     | 78.9  | 78.9  | 1      | N/S                            | 57.9  | 78.9  | 0.2953 | N/S                            |
| Pleurospermum | 11  | 100.0 | 100.0 | N/A    | N/A                     | 100.0 | 100.0 | N/A    | N/A                            | 100.0 | 100.0 | N/A    | N/A                            |
| Lonicera      | 7   | 100.0 | 100.0 | N/A    | N/A                     | 100.0 | 100.0 | N/A    | N/A                            | 100.0 | 100.0 | N/A    | N/A                            |
| Primula       | 134 | 97.0  | 88.8  | 0.0153 | <i>trnH-psbA</i> < ITS2 | 83.6  | 88.8  | 0.288  | N/S                            | 67.9  | 88.8  | <.0001 | <i>trnH-psbA</i> > <i>rbcL</i> |
| Smilax        | 4   | 100.0 | 100.0 | N/A    | N/A                     | 100.0 | 100.0 | N/A    | N/A                            | 100.0 | 100.0 | N/A    | N/A                            |
| Paris         | 40  | 82.5  | 50.0  | 0.0041 | <i>trnH-psbA</i> < ITS2 | 30.0  | 50.0  | 0.1095 | N/S                            | 37.5  | 50.0  | 0.3675 | N/S                            |
| Cephalotaxus  | 29  | 34.5  | 13.8  | 0.1233 | N/S                     | 100.0 | 13.8  | <.0001 | <i>trnH-psbA</i> < <i>matK</i> | 6.9   | 13.8  | 0.6701 | N/S                            |
| Arisaema      | 4   | 100.0 | 100.0 | N/A    | N/A                     | 100.0 | 100.0 | N/A    | N/A                            | 100.0 | 100.0 | N/A    | N/A                            |

|              |    |       |       |        |                         |       |       |        |                                |       |       |        |                                |
|--------------|----|-------|-------|--------|-------------------------|-------|-------|--------|--------------------------------|-------|-------|--------|--------------------------------|
| Kengyilia    | 48 | 62.5  | 39.6  | 0.0406 | <i>trnH-psbA</i> < ITS2 | 25.0  | 39.6  | 0.1899 | N/S                            | 31.3  | 39.6  | 0.5224 | N/S                            |
| Cardamine    | 9  | 77.8  | 100.0 | 0.4706 | N/S                     | 77.8  | 100.0 | 0.4706 | N/S                            | 55.6  | 100.0 | 0.0824 | N/S                            |
| Hypericum    | 5  | 100.0 | 100.0 | N/A    | N/A                     | 100.0 | 100.0 | N/A    | N/A                            | 100.0 | 100.0 | N/A    | N/A                            |
| Hedyotis     | 20 | 100.0 | 95.0  | 1      | N/S                     | 80.0  | 95.0  | 0.3416 | N/S                            | 85.0  | 95.0  | 0.605  | N/S                            |
| Leptodermis  | 15 | 100.0 | 100.0 | N/A    | N/A                     | 53.3  | 100.0 | 0.0063 | <i>trnH-psbA</i> > <i>matK</i> | 6.7   | 100.0 | <.0001 | <i>trnH-psbA</i> > <i>rbcL</i> |
| Hemsleya     | 91 | 12.1  | 72.5  | <.0001 | <i>trnH-psbA</i> > ITS2 | 48.4  | 72.5  | 0.0014 | <i>trnH-psbA</i> > <i>matK</i> | 5.5   | 72.5  | <.0001 | <i>trnH-psbA</i> > <i>rbcL</i> |
| Zygophyllum  | 10 | 50.0  | 60.0  | 1      | N/S                     | 30.0  | 60.0  | 0.3698 | N/S                            | 20.0  | 60.0  | 0.1698 | N/S                            |
| Ostryopsis   | 20 | 50.0  | 65.0  | 0.5231 | N/S                     | 0.0   | 65.0  | <.0001 | <i>trnH-psbA</i> > <i>matK</i> | 10.0  | 65.0  | 0.0008 | <i>trnH-psbA</i> > <i>rbcL</i> |
| Stachyurus   | 5  | 100.0 | 60.0  | 0.4444 | N/S                     | 0.0   | 60.0  | 0.1667 | N/S                            | 40.0  | 60.0  | 1      | N/S                            |
| Draba        | 6  | 100.0 | 100.0 | N/A    | N/A                     | 100.0 | 100.0 | N/A    | N/A                            | 100.0 | 100.0 | N/A    | N/A                            |
| Alpinia      | 8  | 100.0 | 100.0 | N/A    | N/A                     | 100.0 | 100.0 | N/A    | N/A                            | 100.0 | 100.0 | N/A    | N/A                            |
| Sinosenecio  | 60 | 90.0  | 58.3  | 0.0001 | <i>trnH-psbA</i> < ITS2 | 46.7  | 58.3  | 0.2727 | N/S                            | 6.7   | 58.3  | <.0001 | <i>trnH-psbA</i> > <i>rbcL</i> |
| Tupistra     | 9  | 100.0 | 100.0 | N/A    | N/A                     | 100.0 | 100.0 | N/A    | N/A                            | 100.0 | 100.0 | N/A    | N/A                            |
| Bistorta     | 10 | 90.0  | 40.0  | 0.0573 | N/S                     | 30.0  | 40.0  | 1      | N/S                            | 40.0  | 40.0  | 1      | N/S                            |
| Oxyria       | 7  | 100.0 | 100.0 | N/A    | N/A                     | 100.0 | 100.0 | N/A    | N/A                            | 100.0 | 100.0 | N/A    | N/A                            |
| Rhodiola     | 6  | 100.0 | 100.0 | N/A    | N/A                     | 100.0 | 100.0 | N/A    | N/A                            | 66.7  | 100.0 | 0.4545 | N/S                            |
| Thladiantha  | 84 | 57.1  | 96.4  | <.0001 | <i>trnH-psbA</i> > ITS2 | 78.6  | 96.4  | 0.0007 | <i>trnH-psbA</i> > <i>matK</i> | 23.8  | 96.4  | <.0001 | <i>trnH-psbA</i> > <i>rbcL</i> |
| Pugionium    | 10 | 0.0   | 0.0   | N/A    | N/A                     | 0.0   | 0.0   | N/A    | N/A                            | 0.0   | 0.0   | N/A    | N/A                            |
| Soroseris    | 6  | 66.7  | 33.3  | 0.5671 | N/S                     | 16.7  | 33.3  | 1      | N/S                            | 16.7  | 33.3  | 1      | N/S                            |
| Pterygiella  | 17 | 64.7  | 17.6  | 0.0134 | <i>trnH-psbA</i> < ITS2 | 41.2  | 17.6  | 0.2587 | N/S                            | 0.0   | 17.6  | 0.2273 | N/S                            |
| Syncalathium | 8  | 100.0 | 100.0 | N/A    | N/A                     | 100.0 | 100.0 | N/A    | N/A                            | 100.0 | 100.0 | N/A    | N/A                            |

N/A: Not Applicable, N/S: Not Significant.
