# Supplementary material for: Utility of the trnH–psbA Intergenic Spacer Region and Its Combinations as Plant DNA Barcodes: A Meta-Analysis
Source: PubMed Central journal article supplement (PMC3498263; doi:10.1371/journal.pone.0048833), 2012-11-14
Supplement: pone.0048833.s014.pdf [file pone.0048833.s014.pdf]

**Table S14.** Detailed information on the identification success rate of two-locus combinations at the family level and the corresponding statistical test results.

| Family          | N   | <i>trnH-psbA</i> +ITS2 and <i>trnH-psbA</i> + <i>matK</i> |                                            |        |                                                        | <i>trnH-psbA</i> +ITS2 and <i>trnH-psbA</i> + <i>rbcl</i> |                                            |        |                                                        | <i>matK</i> + <i>rbcl</i> and <i>trnH-psbA</i> +ITS2 |                                    |        |                                                   |
|-----------------|-----|-----------------------------------------------------------|--------------------------------------------|--------|--------------------------------------------------------|-----------------------------------------------------------|--------------------------------------------|--------|--------------------------------------------------------|------------------------------------------------------|------------------------------------|--------|---------------------------------------------------|
|                 |     | <i>trnH-psbA</i> +ITS2 success (%)                        | <i>trnH-psbA</i> + <i>matK</i> success (%) | 2-Tail | Result                                                 | <i>trnH-psbA</i> +ITS2 success (%)                        | <i>trnH-psbA</i> + <i>rbcl</i> success (%) | 2-Tail | Result                                                 | <i>matK</i> + <i>rbcl</i> success (%)                | <i>trnH-psbA</i> +ITS2 success (%) | 2-Tail | Result                                            |
| Ranunculaceae   | 34  | 58.8                                                      | 52.9                                       | 0.8073 | N/S                                                    | 58.8                                                      | 47.1                                       | 0.4664 | N/S                                                    | 23.5                                                 | 58.8                               | 0.006  | <i>trnH-psbA</i> +ITS2> <i>matK</i> + <i>rbcl</i> |
| Moraceae        | 9   | 100.0                                                     | 100.0                                      | N/A    | N/A                                                    | 100.0                                                     | 100.0                                      | N/A    | N/A                                                    | 100.0                                                | 100.0                              | N/A    | N/A                                               |
| Betulaceae      | 20  | 65.0                                                      | 65.0                                       | 1      | N/S                                                    | 65.0                                                      | 70.0                                       | 1      | N/S                                                    | 10.0                                                 | 65.0                               | 8E-04  | <i>trnH-psbA</i> +ITS2> <i>matK</i> + <i>rbcl</i> |
| Amaranthaceae   | 53  | 79.2                                                      | 75.5                                       | 0.8169 | N/S                                                    | 79.2                                                      | 64.2                                       | 0.1305 | N/S                                                    | 75.5                                                 | 79.2                               | 0.817  | N/S                                               |
| Caryophyllaceae | 19  | 100.0                                                     | 100.0                                      | N/A    | N/A                                                    | 100.0                                                     | 100.0                                      | N/A    | N/A                                                    | 89.5                                                 | 100.0                              | 0.487  | N/S                                               |
| Polygonaceae    | 23  | 95.7                                                      | 78.3                                       | 0.1868 | N/S                                                    | 95.7                                                      | 78.3                                       | 0.1868 | N/S                                                    | 78.3                                                 | 95.7                               | 0.187  | N/S                                               |
| Cucurbitaceae   | 175 | 84.6                                                      | 84.6                                       | 1      | N/S                                                    | 84.6                                                      | 84.0                                       | 1      | N/S                                                    | 64.0                                                 | 84.6                               | <.0001 | <i>trnH-psbA</i> +ITS2> <i>matK</i> + <i>rbcl</i> |
| Begoniaceae     | 46  | 100.0                                                     | 45.7                                       | <.0001 | <i>trnH-psbA</i> +ITS2> <i>trnH-psbA</i> + <i>matK</i> | 100.0                                                     | 54.3                                       | <.0001 | <i>trnH-psbA</i> +ITS2> <i>trnH-psbA</i> + <i>rbcl</i> | 30.4                                                 | 100.0                              | <.0001 | <i>trnH-psbA</i> +ITS2> <i>matK</i> + <i>rbcl</i> |
| Brassicaceae    | 46  | 54.3                                                      | 52.2                                       | 1      | N/S                                                    | 54.3                                                      | 52.2                                       | 1      | N/S                                                    | 39.1                                                 | 54.3                               | 0.21   | N/S                                               |
| Rosaceae        | 17  | 100.0                                                     | 100.0                                      | N/A    | N/A                                                    | 100.0                                                     | 64.7                                       | 0.0184 | <i>trnH-psbA</i> +ITS2> <i>trnH-psbA</i> + <i>rbcl</i> | 100.0                                                | 100.0                              | N/A    | N/A                                               |
| Crassulaceae    | 6   | 100.0                                                     | 100.0                                      | N/A    | N/A                                                    | 100.0                                                     | 100.0                                      | N/A    | N/A                                                    | 100.0                                                | 100.0                              | N/A    | N/A                                               |
| Apiaceae        | 56  | 98.2                                                      | 82.1                                       | 0.0082 | <i>trnH-psbA</i> +ITS2> <i>trnH-psbA</i> + <i>matK</i> | 98.2                                                      | 73.2                                       | 0.0002 | <i>trnH-psbA</i> +ITS2> <i>trnH-psbA</i> + <i>rbcl</i> | 85.7                                                 | 98.2                               | 0.032  | <i>trnH-psbA</i> +ITS2> <i>matK</i> + <i>rbcl</i> |
| Araliaceae      | 4   | 100.0                                                     | 50.0                                       | 0.4286 | N/S                                                    | 100.0                                                     | 100.0                                      | N/A    | N/A                                                    | 100.0                                                | 100.0                              | N/A    | N/A                                               |
| Solanaceae      | 25  | 100.0                                                     | 100.0                                      | N/A    | N/A                                                    | 100.0                                                     | 100.0                                      | N/A    | N/A                                                    | 100.0                                                | 100.0                              | N/A    | N/A                                               |
| Oleaceae        | 58  | 91.4                                                      | 86.2                                       | 0.5577 | N/S                                                    | 91.4                                                      | 82.8                                       | 0.2681 | N/S                                                    | 79.3                                                 | 91.4                               | 0.113  | N/S                                               |
| Caprifoliaceae  | 7   | 100.0                                                     | 100.0                                      | N/A    | N/A                                                    | 100.0                                                     | 100.0                                      | N/A    | N/A                                                    | 100.0                                                | 100.0                              | N/A    | N/A                                               |
| Adoxaceae       | 46  | 93.5                                                      | 80.4                                       | 0.119  | N/S                                                    | 93.5                                                      | 80.4                                       | 0.119  | N/S                                                    | 45.7                                                 | 93.5                               | <.0001 | <i>trnH-psbA</i> +ITS2> <i>matK</i> + <i>rbcl</i> |
| Asteraceae      | 100 | 96.0                                                      | 70.0                                       | <.0001 | <i>trnH-psbA</i> +ITS2> <i>trnH-psbA</i> + <i>matK</i> | 96.0                                                      | 53.0                                       | <.0001 | <i>trnH-psbA</i> +ITS2> <i>trnH-psbA</i> + <i>rbcl</i> | 48.0                                                 | 96.0                               | <.0001 | <i>trnH-psbA</i> +ITS2> <i>matK</i> + <i>rbcl</i> |
| Aquifoliaceae   | 11  | 100.0                                                     | 100.0                                      | N/A    | N/A                                                    | 100.0                                                     | 100.0                                      | N/A    | N/A                                                    | 100.0                                                | 100.0                              | N/A    | N/A                                               |
| Celastraceae    | 160 | 98.1                                                      | 90.6                                       | 0.006  | <i>trnH-psbA</i> +ITS2> <i>trnH-psbA</i> + <i>matK</i> | 98.1                                                      | 88.8                                       | 0.001  | <i>trnH-psbA</i> +ITS2> <i>trnH-psbA</i> + <i>rbcl</i> | 71.9                                                 | 98.1                               | <.0001 | <i>trnH-psbA</i> +ITS2> <i>matK</i> + <i>rbcl</i> |
| Primulaceae     | 134 | 100.0                                                     | 89.6                                       | <.0001 | <i>trnH-psbA</i> +ITS2> <i>trnH-psbA</i> + <i>matK</i> | 100.0                                                     | 91.8                                       | 0.0008 | <i>trnH-psbA</i> +ITS2> <i>trnH-psbA</i> + <i>rbcl</i> | 87.3                                                 | 100.0                              | <.0001 | <i>trnH-psbA</i> +ITS2> <i>matK</i> + <i>rbcl</i> |
| Ericaceae       | 341 | 52.2                                                      | 57.2                                       | 0.2184 | N/S                                                    | 52.2                                                      | 46.6                                       | 0.168  | N/S                                                    | 44.6                                                 | 52.2                               | 0.055  | N/S                                               |

|                 |     |       |       |        |                                                |       |       |        |                                                        |       |       |        |                                                   |
|-----------------|-----|-------|-------|--------|------------------------------------------------|-------|-------|--------|--------------------------------------------------------|-------|-------|--------|---------------------------------------------------|
| Campanulaceae   | 24  | 100.0 | 79.2  | 0.0496 | <i>trnH-psbA</i> +ITS2> <i>trnH-psbA</i> +matK | 100.0 | 75.0  | 0.0219 | <i>trnH-psbA</i> +ITS2> <i>trnH-psbA</i> + <i>rbcl</i> | 62.5  | 100.0 | 0.002  | <i>trnH-psbA</i> +ITS2> <i>matK</i> + <i>rbcl</i> |
| Alismataceae    | 5   | 100.0 | 0.0   | 0.0079 | <i>trnH-psbA</i> +ITS2> <i>trnH-psbA</i> +matK | 100.0 | 0.0   | 0.0079 | <i>trnH-psbA</i> +ITS2> <i>trnH-psbA</i> + <i>rbcl</i> | 0.0   | 100.0 | 0.008  | <i>trnH-psbA</i> +ITS2> <i>matK</i> + <i>rbcl</i> |
| Araceae         | 4   | 100.0 | 100.0 | N/A    | N/A                                            | 100.0 | 100.0 | N/A    | N/A                                                    | 100.0 | 100.0 | N/A    | N/A                                               |
| Poaceae         | 48  | 75.0  | 47.9  | 0.0114 | <i>trnH-psbA</i> +ITS2> <i>trnH-psbA</i> +matK | 75.0  | 56.3  | 0.0849 | N/S                                                    | 45.8  | 75.0  | 0.006  | <i>trnH-psbA</i> +ITS2> <i>matK</i> + <i>rbcl</i> |
| Zingiberaceae   | 8   | 100.0 | 100.0 | N/A    | N/A                                            | 100.0 | 100.0 | N/A    | N/A                                                    | 100.0 | 100.0 | N/A    | N/A                                               |
| Amaryllidaceae  | 59  | 86.4  | 67.8  | 0.0273 | <i>trnH-psbA</i> +ITS2> <i>trnH-psbA</i> +matK | 86.4  | 78.0  | 0.3359 | N/S                                                    | 72.9  | 86.4  | 0.108  | N/S                                               |
| Dioscoreaceae   | 39  | 89.7  | 92.3  | 1      | N/S                                            | 89.7  | 82.1  | 0.517  | N/S                                                    | 56.4  | 89.7  | 0.002  | <i>trnH-psbA</i> +ITS2> <i>matK</i> + <i>rbcl</i> |
| Smilacaceae     | 4   | 100.0 | 100.0 | N/A    | N/A                                            | 100.0 | 100.0 | N/A    | N/A                                                    | 100.0 | 100.0 | N/A    | N/A                                               |
| Gentianaceae    | 8   | 50.0  | 100.0 | 0.0769 | N/S                                            | 50.0  | 50.0  | 1      | N/S                                                    | 100.0 | 50.0  | 0.077  | N/S                                               |
| Grossulariaceae | 7   | 100.0 | 100.0 | N/A    | N/A                                            | 100.0 | 100.0 | N/A    | N/A                                                    | 100.0 | 100.0 | N/A    | N/A                                               |
| Hydrangeaceae   | 7   | 57.1  | 85.7  | 0.5594 | N/S                                            | 57.1  | 57.1  | 1      | N/S                                                    | 85.7  | 57.1  | 0.559  | N/S                                               |
| Rubiaceae       | 92  | 82.6  | 79.3  | 0.7076 | N/S                                            | 82.6  | 72.8  | 0.1559 | N/S                                                    | 68.5  | 82.6  | 0.039  | <i>trnH-psbA</i> +ITS2> <i>matK</i> + <i>rbcl</i> |
| Taxaceae        | 13  | 100.0 | 46.2  | 0.0052 | <i>trnH-psbA</i> +ITS2> <i>trnH-psbA</i> +matK | 100.0 | 46.2  | 0.0052 | <i>trnH-psbA</i> +ITS2> <i>trnH-psbA</i> + <i>rbcl</i> | 38.5  | 100.0 | 0.002  | <i>trnH-psbA</i> +ITS2> <i>matK</i> + <i>rbcl</i> |
| Elaeagnaceae    | 10  | 100.0 | 100.0 | N/A    | N/A                                            | 100.0 | 100.0 | N/A    | N/A                                                    | 100.0 | 100.0 | N/A    | N/A                                               |
| Asparagaceae    | 38  | 92.1  | 86.8  | 0.711  | N/S                                            | 92.1  | 68.4  | 0.019  | <i>trnH-psbA</i> +ITS2> <i>trnH-psbA</i> + <i>rbcl</i> | 86.8  | 92.1  | 0.711  | N/S                                               |
| Cornaceae       | 6   | 100.0 | 33.3  | 0.0606 | N/S                                            | 100.0 | 33.3  | 0.0606 | N/S                                                    | 33.3  | 100.0 | 0.061  | N/S                                               |
| Meliaceae       | 7   | 85.7  | 57.1  | 0.5594 | N/S                                            | 85.7  | 57.1  | 0.5594 | N/S                                                    | 57.1  | 85.7  | 0.559  | N/S                                               |
| Zygophyllaceae  | 10  | 70.0  | 60.0  | 1      | N/S                                            | 70.0  | 60.0  | 1      | N/S                                                    | 30.0  | 70.0  | 0.179  | N/S                                               |
| Cephalotaxaceae | 29  | 41.4  | 100.0 | <.0001 | <i>trnH-psbA</i> +ITS2< <i>trnH-psbA</i> +matK | 41.4  | 13.8  | 0.0379 | <i>trnH-psbA</i> +ITS2> <i>trnH-psbA</i> + <i>rbcl</i> | 100.0 | 41.4  | <.0001 | <i>trnH-psbA</i> +ITS2< <i>matK</i> + <i>rbcl</i> |
| Melanthiaceae   | 40  | 90.0  | 50.0  | 0.0002 | <i>trnH-psbA</i> +ITS2> <i>trnH-psbA</i> +matK | 90.0  | 52.5  | 0.0004 | <i>trnH-psbA</i> +ITS2> <i>trnH-psbA</i> + <i>rbcl</i> | 45.0  | 90.0  | <.0001 | <i>trnH-psbA</i> +ITS2> <i>matK</i> + <i>rbcl</i> |
| Stachyuraceae   | 5   | 100.0 | 60.0  | 0.4444 | N/S                                            | 100.0 | 80.0  | 1      | N/S                                                    | 40.0  | 100.0 | 0.167  | N/S                                               |
| Nitrariaceae    | 5   | 100.0 | 100.0 | N/A    | N/A                                            | 100.0 | 100.0 | N/A    | N/A                                                    | 20.0  | 100.0 | 0.048  | <i>trnH-psbA</i> +ITS2> <i>matK</i> + <i>rbcl</i> |
| Orobanchaceae   | 315 | 95.2  | 91.1  | 0.0569 | N/S                                            | 95.2  | 86.3  | 0.0002 | <i>trnH-psbA</i> +ITS2> <i>trnH-psbA</i> + <i>rbcl</i> | 75.9  | 95.2  | <.0001 | <i>trnH-psbA</i> +ITS2> <i>matK</i> + <i>rbcl</i> |
| Hypericaceae    | 5   | 100.0 | 100.0 | N/A    | N/A                                            | 100.0 | 100.0 | N/A    | N/A                                                    | 100.0 | 100.0 | N/A    | N/A                                               |
| Aceraceae       | 12  | 100.0 | 100.0 | N/A    | N/A                                            | 100.0 | 100.0 | N/A    | N/A                                                    | 100.0 | 100.0 | N/A    | N/A                                               |

N/A: Not Applicable, N/S: Not Significant.
