# Supplementary material for: Utility of the trnH–psbA Intergenic Spacer Region and Its Combinations as Plant DNA Barcodes: A Meta-Analysis
Source: PubMed Central journal article supplement (PMC3498263; doi:10.1371/journal.pone.0048833), 2012-11-14
Supplement: pone.0048833.s015.pdf [file pone.0048833.s015.pdf]

**Table S15.** Detailed information on the identification success rate of two-locus combinations at the genus level and the corresponding statistical test results.

| Genus        | N   | <i>trnH-psbA</i> +ITS2 and <i>trnH-psbA</i> + <i>matK</i> |                                            |        |                                                        | <i>trnH-psbA</i> +ITS2 and <i>trnH-psbA</i> + <i>rbcL</i> |                                            |        |                                                        | <i>matK</i> + <i>rbcL</i> and <i>trnH-psbA</i> +ITS2 |                                    |        |                                                   |
|--------------|-----|-----------------------------------------------------------|--------------------------------------------|--------|--------------------------------------------------------|-----------------------------------------------------------|--------------------------------------------|--------|--------------------------------------------------------|------------------------------------------------------|------------------------------------|--------|---------------------------------------------------|
|              |     | <i>trnH-psbA</i> +ITS2 success (%)                        | <i>trnH-psbA</i> + <i>matK</i> success (%) | 2-Tail | Result                                                 | <i>trnH-psbA</i> +ITS2 success (%)                        | <i>trnH-psbA</i> + <i>rbcL</i> success (%) | 2-Tail | Result                                                 | <i>matK</i> + <i>rbcL</i> success (%)                | <i>trnH-psbA</i> +ITS2 success (%) | 2-Tail | Result                                            |
| Ficus        | 9   | 100.0                                                     | 100.0                                      | N/A    | N/A                                                    | 100.0                                                     | 100.0                                      | N/A    | N/A                                                    | 100.0                                                | 100.0                              | N/A    | N/A                                               |
| Chenopodium  | 24  | 100.0                                                     | 100.0                                      | N/A    | N/A                                                    | 100.0                                                     | 100.0                                      | N/A    | N/A                                                    | 100.0                                                | 100.0                              | N/A    | N/A                                               |
| Amaranthus   | 24  | 54.2                                                      | 45.8                                       | 0.7732 | N/S                                                    | 54.2                                                      | 20.8                                       | 0.0355 | <i>trnH-psbA</i> +ITS2> <i>trnH-psbA</i> + <i>rbcL</i> | 45.8                                                 | 54.2                               | 0.7732 | N/S                                               |
| Silene       | 19  | 100.0                                                     | 100.0                                      | N/A    | N/A                                                    | 100.0                                                     | 100.0                                      | N/A    | N/A                                                    | 89.5                                                 | 100.0                              | 0.4865 | N/S                                               |
| Rheum        | 6   | 100.0                                                     | 100.0                                      | N/A    | N/A                                                    | 100.0                                                     | 100.0                                      | N/A    | N/A                                                    | 100.0                                                | 100.0                              | N/A    | N/A                                               |
| Begonia      | 46  | 100.0                                                     | 45.7                                       | <.0001 | <i>trnH-psbA</i> +ITS2> <i>trnH-psbA</i> + <i>matK</i> | 100.0                                                     | 54.3                                       | <.0001 | <i>trnH-psbA</i> +ITS2> <i>trnH-psbA</i> + <i>rbcL</i> | 30.4                                                 | 100.0                              | <.0001 | <i>trnH-psbA</i> +ITS2> <i>matK</i> + <i>rbcL</i> |
| Prunus       | 17  | 100.0                                                     | 100.0                                      | N/A    | N/A                                                    | 100.0                                                     | 64.7                                       | 0.0184 | <i>trnH-psbA</i> +ITS2> <i>trnH-psbA</i> + <i>rbcL</i> | 100.0                                                | 100.0                              | N/A    | N/A                                               |
| Parnassia    | 160 | 98.1                                                      | 90.6                                       | 0.006  | <i>trnH-psbA</i> +ITS2> <i>trnH-psbA</i> + <i>matK</i> | 98.1                                                      | 88.8                                       | 0.001  | <i>trnH-psbA</i> +ITS2> <i>trnH-psbA</i> + <i>rbcL</i> | 71.9                                                 | 98.1                               | <.0001 | <i>trnH-psbA</i> +ITS2> <i>matK</i> + <i>rbcL</i> |
| Ribes        | 7   | 100.0                                                     | 100.0                                      | N/A    | N/A                                                    | 100.0                                                     | 100.0                                      | N/A    | N/A                                                    | 100.0                                                | 100.0                              | N/A    | N/A                                               |
| Acer         | 12  | 100.0                                                     | 100.0                                      | N/A    | N/A                                                    | 100.0                                                     | 100.0                                      | N/A    | N/A                                                    | 100.0                                                | 100.0                              | N/A    | N/A                                               |
| Panax        | 4   | 100.0                                                     | 50.0                                       | 0.4286 | N/S                                                    | 100.0                                                     | 100.0                                      | N/A    | N/A                                                    | 100.0                                                | 100.0                              | N/A    | N/A                                               |
| Datura       | 14  | 100.0                                                     | 100.0                                      | N/A    | N/A                                                    | 100.0                                                     | 100.0                                      | N/A    | N/A                                                    | 100.0                                                | 100.0                              | N/A    | N/A                                               |
| Solanum      | 11  | 100.0                                                     | 100.0                                      | N/A    | N/A                                                    | 100.0                                                     | 100.0                                      | N/A    | N/A                                                    | 100.0                                                | 100.0                              | N/A    | N/A                                               |
| Sambucus     | 22  | 95.5                                                      | 95.5                                       | 1      | N/S                                                    | 95.5                                                      | 95.5                                       | 1      | N/S                                                    | 50.0                                                 | 95.5                               | 0.0015 | <i>trnH-psbA</i> +ITS2> <i>matK</i> + <i>rbcL</i> |
| Viburnum     | 24  | 91.7                                                      | 66.7                                       | 0.0723 | N/S                                                    | 91.7                                                      | 66.7                                       | 0.0723 | N/S                                                    | 41.7                                                 | 91.7                               | 0.0005 | <i>trnH-psbA</i> +ITS2> <i>matK</i> + <i>rbcL</i> |
| Ligularia    | 26  | 100.0                                                     | 53.8                                       | <.0001 | <i>trnH-psbA</i> +ITS2> <i>trnH-psbA</i> + <i>matK</i> | 100.0                                                     | 30.8                                       | <.0001 | <i>trnH-psbA</i> +ITS2> <i>trnH-psbA</i> + <i>rbcL</i> | 42.3                                                 | 100.0                              | <.0001 | <i>trnH-psbA</i> +ITS2> <i>matK</i> + <i>rbcL</i> |
| Nyssa        | 6   | 100.0                                                     | 33.3                                       | 0.0606 | N/S                                                    | 100.0                                                     | 33.3                                       | 0.0606 | N/S                                                    | 33.3                                                 | 100.0                              | 0.0606 | N/S                                               |
| Ilex         | 11  | 100.0                                                     | 100.0                                      | N/A    | N/A                                                    | 100.0                                                     | 100.0                                      | N/A    | N/A                                                    | 100.0                                                | 100.0                              | N/A    | N/A                                               |
| Rhododendron | 211 | 52.6                                                      | 57.3                                       | 0.3786 | N/S                                                    | 52.6                                                      | 50.7                                       | 0.7701 | N/S                                                    | 36.5                                                 | 52.6                               | 0.0012 | <i>trnH-psbA</i> +ITS2> <i>matK</i> + <i>rbcL</i> |
| Allium       | 59  | 86.4                                                      | 67.8                                       | 0.0273 | <i>trnH-psbA</i> +ITS2> <i>trnH-psbA</i> + <i>matK</i> | 86.4                                                      | 78.0                                       | 0.3359 | N/S                                                    | 72.9                                                 | 86.4                               | 0.1082 | N/S                                               |
| Cassiope     | 12  | 75.0                                                      | 58.3                                       | 0.6668 | N/S                                                    | 75.0                                                      | 58.3                                       | 0.6668 | N/S                                                    | 66.7                                                 | 75.0                               | 1      | N/S                                               |
| Gaultheria   | 118 | 49.2                                                      | 56.8                                       | 0.2968 | N/S                                                    | 49.2                                                      | 38.1                                       | 0.115  | N/S                                                    | 56.8                                                 | 49.2                               | 0.2968 | N/S                                               |

|               |     |       |       |        |                                                        |       |       |        |                                                        |       |       |        |                                                   |
|---------------|-----|-------|-------|--------|--------------------------------------------------------|-------|-------|--------|--------------------------------------------------------|-------|-------|--------|---------------------------------------------------|
| Ligustrum     | 58  | 91.4  | 86.2  | 0.5577 | N/S                                                    | 91.4  | 82.8  | 0.2681 | N/S                                                    | 79.3  | 91.4  | 0.1133 | N/S                                               |
| Alisma        | 5   | 100.0 | 0.0   | 0.0079 | <i>trnH-psbA</i> +ITS2> <i>trnH-psbA</i> + <i>matK</i> | 100.0 | 0.0   | 0.0079 | <i>trnH-psbA</i> +ITS2> <i>trnH-psbA</i> + <i>rbcL</i> | 0.0   | 100.0 | 0.0079 | <i>trnH-psbA</i> +ITS2> <i>matK</i> + <i>rbcL</i> |
| Maianthemum   | 29  | 89.7  | 82.8  | 0.7057 | N/S                                                    | 89.7  | 58.6  | 0.0148 | <i>trnH-psbA</i> +ITS2> <i>trnH-psbA</i> + <i>rbcL</i> | 82.8  | 89.7  | 0.7057 | N/S                                               |
| Cyananthus    | 24  | 100.0 | 79.2  | 0.0496 | <i>trnH-psbA</i> +ITS2> <i>trnH-psbA</i> + <i>matK</i> | 100.0 | 75.0  | 0.0219 | <i>trnH-psbA</i> +ITS2> <i>trnH-psbA</i> + <i>rbcL</i> | 62.5  | 100.0 | 0.0016 | <i>trnH-psbA</i> +ITS2> <i>matK</i> + <i>rbcL</i> |
| Lepidium      | 21  | 47.6  | 42.9  | 1      | N/S                                                    | 47.6  | 42.9  | 1      | N/S                                                    | 23.8  | 47.6  | 0.1971 | N/S                                               |
| Gentiana      | 8   | 50.0  | 100.0 | 0.0769 | N/S                                                    | 50.0  | 50.0  | 1      | N/S                                                    | 100.0 | 50.0  | 0.0769 | N/S                                               |
| Hydrangea     | 7   | 57.1  | 85.7  | 0.5594 | N/S                                                    | 57.1  | 57.1  | 1      | N/S                                                    | 85.7  | 57.1  | 0.5594 | N/S                                               |
| Amentotaxus   | 13  | 100.0 | 46.2  | 0.0052 | <i>trnH-psbA</i> +ITS2> <i>trnH-psbA</i> + <i>matK</i> | 100.0 | 46.2  | 0.0052 | <i>trnH-psbA</i> +ITS2> <i>trnH-psbA</i> + <i>rbcL</i> | 38.5  | 100.0 | 0.0016 | <i>trnH-psbA</i> +ITS2> <i>matK</i> + <i>rbcL</i> |
| Pedicularis   | 298 | 97.0  | 94.0  | 0.1136 | N/S                                                    | 97.0  | 90.3  | 0.0012 | <i>trnH-psbA</i> +ITS2> <i>trnH-psbA</i> + <i>rbcL</i> | 77.9  | 97.0  | <.0001 | <i>trnH-psbA</i> +ITS2> <i>matK</i> + <i>rbcL</i> |
| Luculia       | 10  | 20.0  | 0.0   | 0.4737 | N/S                                                    | 20.0  | 0.0   | 0.4737 | N/S                                                    | 0.0   | 20.0  | 0.4737 | N/S                                               |
| Morinda       | 13  | 69.2  | 53.8  | 0.6882 | N/S                                                    | 69.2  | 15.4  | 0.0154 | <i>trnH-psbA</i> +ITS2> <i>trnH-psbA</i> + <i>rbcL</i> | 46.2  | 69.2  | 0.4283 | N/S                                               |
| Mussaenda     | 21  | 81.0  | 85.7  | 1      | N/S                                                    | 81.0  | 90.5  | 0.6628 | N/S                                                    | 71.4  | 81.0  | 0.7186 | N/S                                               |
| Oldenlandia   | 13  | 100.0 | 100.0 | N/A    | N/A                                                    | 100.0 | 84.6  | 0.48   | N/S                                                    | 100.0 | 100.0 | N/A    | N/A                                               |
| Nitraria      | 5   | 100.0 | 100.0 | N/A    | N/A                                                    | 100.0 | 100.0 | N/A    | N/A                                                    | 20.0  | 100.0 | 0.0476 | <i>trnH-psbA</i> +ITS2> <i>matK</i> + <i>rbcL</i> |
| Cipadessa     | 7   | 85.7  | 57.1  | 0.5594 | N/S                                                    | 85.7  | 57.1  | 0.5594 | N/S                                                    | 57.1  | 85.7  | 0.5594 | N/S                                               |
| Tacca         | 39  | 89.7  | 92.3  | 1      | N/S                                                    | 89.7  | 82.1  | 0.517  | N/S                                                    | 56.4  | 89.7  | 0.0018 | <i>trnH-psbA</i> +ITS2> <i>matK</i> + <i>rbcL</i> |
| Suaeda        | 5   | 100.0 | 100.0 | N/A    | N/A                                                    | 100.0 | 100.0 | N/A    | N/A                                                    | 100.0 | 100.0 | N/A    | N/A                                               |
| Hippophae     | 10  | 100.0 | 100.0 | N/A    | N/A                                                    | 100.0 | 100.0 | N/A    | N/A                                                    | 100.0 | 100.0 | N/A    | N/A                                               |
| Aconitum      | 34  | 58.8  | 52.9  | 0.8073 | N/S                                                    | 58.8  | 47.1  | 0.4664 | N/S                                                    | 23.5  | 58.8  | 0.0062 | <i>trnH-psbA</i> +ITS2> <i>matK</i> + <i>rbcL</i> |
| Osmorhiza     | 26  | 100.0 | 76.9  | 0.0226 | <i>trnH-psbA</i> +ITS2> <i>trnH-psbA</i> + <i>matK</i> | 100.0 | 57.7  | 0.0003 | <i>trnH-psbA</i> +ITS2> <i>trnH-psbA</i> + <i>rbcL</i> | 84.6  | 100.0 | 0.1104 | N/S                                               |
| Peucedanum    | 19  | 94.7  | 78.9  | 0.3398 | N/S                                                    | 94.7  | 78.9  | 0.3398 | N/S                                                    | 78.9  | 94.7  | 0.3398 | N/S                                               |
| Pleurospermum | 11  | 100.0 | 100.0 | N/A    | N/A                                                    | 100.0 | 100.0 | N/A    | N/A                                                    | 100.0 | 100.0 | N/A    | N/A                                               |
| Lonicera      | 7   | 100.0 | 100.0 | N/A    | N/A                                                    | 100.0 | 100.0 | N/A    | N/A                                                    | 100.0 | 100.0 | N/A    | N/A                                               |
| Primula       | 134 | 100.0 | 89.6  | <.0001 | <i>trnH-psbA</i> +ITS2> <i>trnH-psbA</i> + <i>matK</i> | 100.0 | 91.8  | 0.0008 | <i>trnH-psbA</i> +ITS2> <i>trnH-psbA</i> + <i>rbcL</i> | 87.3  | 100.0 | <.0001 | <i>trnH-psbA</i> +ITS2> <i>matK</i> + <i>rbcL</i> |
| Smilax        | 4   | 100.0 | 100.0 | N/A    | N/A                                                    | 100.0 | 100.0 | N/A    | N/A                                                    | 100.0 | 100.0 | N/A    | N/A                                               |
| Paris         | 40  | 90.0  | 50.0  | 0.0002 | <i>trnH-psbA</i> +ITS2> <i>trnH-psbA</i> + <i>matK</i> | 90.0  | 52.5  | 0.0004 | <i>trnH-psbA</i> +ITS2> <i>trnH-psbA</i> + <i>rbcL</i> | 45.0  | 90.0  | <.0001 | <i>trnH-psbA</i> +ITS2> <i>matK</i> + <i>rbcL</i> |
| Cephalotaxus  | 29  | 41.4  | 100.0 | <.0001 | <i>trnH-psbA</i> +ITS2< <i>trnH-psbA</i> + <i>matK</i> | 41.4  | 13.8  | 0.0379 | <i>trnH-psbA</i> +ITS2> <i>trnH-psbA</i> + <i>rbcL</i> | 100.0 | 41.4  | <.0001 | <i>trnH-psbA</i> +ITS2< <i>matK</i> + <i>rbcL</i> |

|              |    |       |       |        |                                                        |       |       |        |                                                        |       |       |        |                                                   |
|--------------|----|-------|-------|--------|--------------------------------------------------------|-------|-------|--------|--------------------------------------------------------|-------|-------|--------|---------------------------------------------------|
| Arisaema     | 4  | 100.0 | 100.0 | N/A    | N/A                                                    | 100.0 | 100.0 | N/A    | N/A                                                    | 100.0 | 100.0 | N/A    | N/A                                               |
| Kengyilia    | 48 | 75.0  | 47.9  | 0.0114 | <i>trnH-psbA</i> +ITS2> <i>trnH-psbA</i> + <i>matK</i> | 75.0  | 56.3  | 0.0849 | N/S                                                    | 45.8  | 75.0  | 0.0063 | <i>trnH-psbA</i> +ITS2> <i>matK</i> + <i>rbcL</i> |
| Cardamine    | 9  | 100.0 | 100.0 | N/A    | N/A                                                    | 100.0 | 100.0 | N/A    | N/A                                                    | 77.8  | 100.0 | 0.4706 | N/S                                               |
| Hypericum    | 5  | 100.0 | 100.0 | N/A    | N/A                                                    | 100.0 | 100.0 | N/A    | N/A                                                    | 100.0 | 100.0 | N/A    | N/A                                               |
| Hedyotis     | 20 | 100.0 | 100.0 | N/A    | N/A                                                    | 100.0 | 100.0 | N/A    | N/A                                                    | 100.0 | 100.0 | N/A    | N/A                                               |
| Leptodermis  | 15 | 100.0 | 100.0 | N/A    | N/A                                                    | 100.0 | 100.0 | N/A    | N/A                                                    | 60.0  | 100.0 | 0.0169 | <i>trnH-psbA</i> +ITS2> <i>matK</i> + <i>rbcL</i> |
| Hemsleya     | 91 | 72.5  | 73.6  | 1      | N/S                                                    | 72.5  | 72.5  | 1      | N/S                                                    | 50.5  | 72.5  | 0.0036 | <i>trnH-psbA</i> +ITS2> <i>matK</i> + <i>rbcL</i> |
| Zygophyllum  | 10 | 70.0  | 60.0  | 1      | N/S                                                    | 70.0  | 60.0  | 1      | N/S                                                    | 30.0  | 70.0  | 0.1789 | N/S                                               |
| Ostryopsis   | 20 | 65.0  | 65.0  | 1      | N/S                                                    | 65.0  | 70.0  | 1      | N/S                                                    | 10.0  | 65.0  | 0.0008 | <i>trnH-psbA</i> +ITS2> <i>matK</i> + <i>rbcL</i> |
| Stachyurus   | 5  | 100.0 | 60.0  | 0.4444 | N/S                                                    | 100.0 | 80.0  | 1      | N/S                                                    | 40.0  | 100.0 | 0.1667 | N/S                                               |
| Draba        | 6  | 100.0 | 100.0 | N/A    | N/A                                                    | 100.0 | 100.0 | N/A    | N/A                                                    | 100.0 | 100.0 | N/A    | N/A                                               |
| Alpinia      | 8  | 100.0 | 100.0 | N/A    | N/A                                                    | 100.0 | 100.0 | N/A    | N/A                                                    | 100.0 | 100.0 | N/A    | N/A                                               |
| Sinosenecio  | 60 | 96.7  | 76.7  | 0.0022 | <i>trnH-psbA</i> +ITS2> <i>trnH-psbA</i> + <i>matK</i> | 96.7  | 58.3  | <.0001 | <i>trnH-psbA</i> +ITS2> <i>trnH-psbA</i> + <i>rbcL</i> | 46.7  | 96.7  | <.0001 | <i>trnH-psbA</i> +ITS2> <i>matK</i> + <i>rbcL</i> |
| Tupistra     | 9  | 100.0 | 100.0 | N/A    | Na                                                     | 100.0 | 100.0 | N/A    | N/A                                                    | 100.0 | 100.0 | N/A    | N/A                                               |
| Bistorta     | 10 | 90.0  | 50.0  | 0.1409 | N/S                                                    | 90.0  | 50.0  | 0.1409 | N/S                                                    | 50.0  | 90.0  | 0.1409 | N/S                                               |
| Oxyria       | 7  | 100.0 | 100.0 | N/A    | N/A                                                    | 100.0 | 100.0 | N/A    | N/A                                                    | 100.0 | 100.0 | N/A    | N/A                                               |
| Rhodiola     | 6  | 100.0 | 100.0 | N/A    | N/A                                                    | 100.0 | 100.0 | N/A    | N/A                                                    | 100.0 | 100.0 | N/A    | N/A                                               |
| Thladiantha  | 84 | 97.6  | 96.4  | 1      | N/S                                                    | 97.6  | 96.4  | 1      | N/S                                                    | 78.6  | 97.6  | 0.0002 | <i>trnH-psbA</i> +ITS2> <i>matK</i> + <i>rbcL</i> |
| Pugonium     | 10 | 0.0   | 0.0   | N/A    | N/A                                                    | 0.0   | 0.0   | N/A    | N/A                                                    | 0.0   | 0.0   | N/A    | N/A                                               |
| Sorosaris    | 6  | 66.7  | 33.3  | 0.5671 | N/S                                                    | 66.7  | 33.3  | 0.5671 | N/S                                                    | 16.7  | 66.7  | 0.2424 | N/S                                               |
| Pterygiella  | 17 | 64.7  | 41.2  | 0.3028 | N/S                                                    | 64.7  | 17.6  | 0.0134 | <i>trnH-psbA</i> +ITS2> <i>trnH-psbA</i> + <i>rbcL</i> | 41.2  | 64.7  | 0.3028 | N/S                                               |
| Syncalathium | 8  | 100.0 | 100.0 | N/A    | N/A                                                    | 100.0 | 100.0 | N/A    | N/A                                                    | 100.0 | 100.0 | N/A    | N/A                                               |

N/A: Not Applicable, N/S: Not Significant.
